# Supplementary material for: Integrated transcriptome profiling identifies novel regulatory hubs mediating salt stress responses during germination and early seedling development in wheat
Source: Research Square preprint supplement (doi:10.21203/rs.3.rs-8546897/v1), 2026-01-22
Supplement: Supplementary file 1 [file 227472953dcef04176b83c26.xlsx]

## Sheet: Sheet1
	The annotation of 607 target genes
Gene ID	Annotation
	The homologous genes and corresponding descriptions in Arabidopsis thaliana			The homologous genes and corresponding descriptions in Oryza sativa
TraesCS1A02G015400	AT1G09630	RABA2A	Ras-related protein RABA2a	LOC_Os05g01480	ras-related protein
TraesCS1A02G038200	AT5G02560	HTA12	Probable histone H2A.4	LOC_Os01g31800	Core histone H2A/H2B/H3/H4 domain containing protein
TraesCS1A02G039800	AT2G28630	KCS12	3-ketoacyl-CoA synthase 12	LOC_Os03g26530	3-ketoacyl-CoA synthase
TraesCS1A02G082300	AT1G48330		unknown protein%3B BEST Arabidopsis thaliana protein match is: unknown protein (TAIR:AT3G17580.1)%3B Has 40 Blast hits to 40 proteins in 11 species: Archae - 0%3B Bacteria - 0%3B Metazoa - 0%3B Fungi - 0%3B Plants - 40%3B Viruses - 0%3B Other Eukaryotes - 0 (source /.../ BLink).	LOC_Os05g04680	expressed protein
TraesCS1A02G099100	AT5G16910	CSLD2	Cellulose synthase-like protein D2	LOC_Os07g36630	CSLF8 - cellulose synthase-like family F; beta1
TraesCS1A02G113100	AT2G46330	AGP16	Arabinogalactan peptide 16	LOC_Os05g12580	expressed protein
TraesCS1A02G132400	AT3G54560	H2AV	Histone H2A variant 1	LOC_Os10g28230	Core histone H2A/H2B/H3/H4 domain containing protein
TraesCS1A02G176000	AT4G12420	SKU5	Monocopper oxidase-like protein SKU5	LOC_Os10g36390	monocopper oxidase
TraesCS1A02G197700	AT2G02040	NPF8.3	Protein NRT1/ PTR FAMILY 8.3	LOC_Os10g42900	peptide transporter PTR2
TraesCS1A02G204700	AT1G20330	SMT2	24-methylenesterol C-methyltransferase 2	LOC_Os03g04340	C-methyltransferase
TraesCS1A02G205100	AT2G17730	NIP2	NEP1-interacting protein 2	LOC_Os10g39770	zinc finger
TraesCS1A02G209100	AT5G38710	POX2	Proline dehydrogenase 2%2C mitochondrial	LOC_Os10g40360	proline oxidase
TraesCS1A02G212300	AT1G65680	EXPB2	Putative expansin-B2	LOC_Os10g40710	expansin precursor
TraesCS1A02G212600	AT1G65680	EXPB2	Putative expansin-B2	LOC_Os10g40730	expansin precursor
TraesCS1A02G221600	AT2G45050	GATA2	GATA transcription factor 2	LOC_Os10g40810	GATA zinc finger domain containing protein
TraesCS1A02G229100	AT5G22880	H2B	Histone H2B.10	LOC_Os01g05900	Core histone H2A/H2B/H3/H4 domain containing protein
TraesCS1A02G236000	AT4G03110	BRN1	RNA-binding protein BRN1	LOC_Os05g30980	RNA recognition motif containing protein
TraesCS1A02G251900	AT1G03220		Eukaryotic aspartyl protease family protein	LOC_Os05g33400	basic 7S globulin precursor
TraesCS1A02G264000	AT1G44900	MCM2	DNA replication licensing factor MCM2	LOC_Os11g29380	MCM2 - Putative minichromosome maintenance MCM complex subunit 2
TraesCS1A02G272000	AT5G67360	SBT1.7	Subtilisin-like protease SBT1.7	LOC_Os05g36010	OsSub47 - Putative Subtilisin homologue
TraesCS1A02G284500	AT3G46550	FLA4	Fasciclin-like arabinogalactan protein 4	LOC_Os05g38500	fasciclin-like arabinogalactan protein
TraesCS1A02G291700	AT1G07660		Histone H4	LOC_Os05g39050	Core histone H2A/H2B/H3/H4 domain containing protein
TraesCS1A02G295400	AT1G07660		Histone H4	LOC_Os05g39050	Core histone H2A/H2B/H3/H4 domain containing protein
TraesCS1A02G355700	AT2G34700		Pollen Ole e 1 allergen and extensin family protein	LOC_Os05g45480	POEI45 - Pollen Ole e I allergen and extensin family protein precursor
TraesCS1A02G361600	AT3G45980	H2B	Histone H2B.6	LOC_Os01g05610	Core histone H2A/H2B/H3/H4 domain containing protein
TraesCS1B02G024200	AT1G72260	THI2.1	Thionin-2.1	LOC_Os06g31280	THION1 - Plant thionin family protein precursor
TraesCS1B02G100600	AT1G09540	MYB61	myb domain protein 61	LOC_Os05g04820	MYB family transcription factor
TraesCS1B02G158000	AT4G19810		Glycosyl hydrolase family protein with chitinase insertion domain	LOC_Os10g28050	chitinase 2
TraesCS1B02G204100	AT4G12420	SKU5	Monocopper oxidase-like protein SKU5	LOC_Os10g36390	monocopper oxidase
TraesCS1B02G213600	AT4G19120	ERD3	Probable methyltransferase PMT21	LOC_Os02g45310	dehydration response related protein
TraesCS1B02G218300	AT1G20330	SMT2	24-methylenesterol C-methyltransferase 2	LOC_Os03g04340	C-methyltransferase
TraesCS1B02G218700	AT2G17730	NIP2	NEP1-interacting protein 2	LOC_Os10g39770	zinc finger
TraesCS1B02G223300	AT5G38710	POX2	Proline dehydrogenase 2%2C mitochondrial	LOC_Os10g40360	proline oxidase
TraesCS1B02G226100	AT1G65680	EXPB2	Putative expansin-B2	LOC_Os10g40730	expansin precursor
TraesCS1B02G232700	AT4G16780	HAT4	Homeobox-leucine zipper protein HAT4	LOC_Os10g41230	homeobox associated leucine zipper
TraesCS1B02G234800	AT2G45050	GATA2	GATA transcription factor 2	LOC_Os10g40810	GATA zinc finger domain containing protein
TraesCS1B02G238900	AT1G02610		RING/FYVE/PHD zinc finger superfamily protein	LOC_Os05g28730	zinc finger
TraesCS1B02G246900	AT3G26700		Protein kinase superfamily protein	LOC_Os05g30820	protein kinase
TraesCS1B02G247700	AT1G08860	BON3	Protein BONZAI 3	LOC_Os05g30970	copine
TraesCS1B02G255700	AT5G26230	MAKR1	Probable membrane-associated kinase regulator 1	LOC_Os05g32440	expressed protein
TraesCS1B02G263100	AT1G03220		Eukaryotic aspartyl protease family protein	LOC_Os05g33400	basic 7S globulin precursor
TraesCS1B02G278800				LOC_Os10g08780	expressed protein
TraesCS1B02G286300	AT2G27690	CYP94C1	Cytochrome P450 94C1	LOC_Os05g37250	cytochrome P450
TraesCS1B02G297100	AT1G07660		Histone H4	LOC_Os05g39050	Core histone H2A/H2B/H3/H4 domain containing protein
TraesCS1B02G301100	AT1G07660		Histone H4	LOC_Os05g39050	Core histone H2A/H2B/H3/H4 domain containing protein
TraesCS1B02G304700	AT1G07660		Histone H4	LOC_Os05g39050	Core histone H2A/H2B/H3/H4 domain containing protein
TraesCS1B02G357400	AT5G27670	HTA7	Probable histone H2A.5	LOC_Os05g02300	Core histone H2A/H2B/H3/H4 domain containing protein
TraesCS1B02G375900	AT1G09200	HTR2	Histone H3.2	LOC_Os01g64640	histone H3
TraesCS1B02G376700	AT1G09200	HTR2	Histone H3.2	LOC_Os01g64640	histone H3
TraesCS1B02G378300	AT3G46030	HTB11	Histone H2B.7	LOC_Os01g05610	Core histone H2A/H2B/H3/H4 domain containing protein
TraesCS1B02G386400	AT3G46030	HTB11	Histone H2B.7	LOC_Os01g05610	Core histone H2A/H2B/H3/H4 domain containing protein
TraesCS1B02G407500	AT5G45910		GDSL esterase/lipase At5g45910	LOC_Os06g06290	GDSL-like lipase/acylhydrolase
TraesCS1B02G416600	AT5G22880	H2B	Histone H2B.10	LOC_Os01g05610	Core histone H2A/H2B/H3/H4 domain containing protein
TraesCS1B02G424900	AT5G03170	FLA11	Fasciclin-like arabinogalactan protein 11	LOC_Os05g48890	fasciclin domain containing protein
TraesCS1B02G425000	AT5G03170	FLA11	Fasciclin-like arabinogalactan protein 11	LOC_Os05g48900	fasciclin domain containing protein
TraesCS1B02G445200	AT3G25690	CHUP1	Protein CHUP1%2C chloroplastic	LOC_Os12g01449	chloroplast unusual positioning protein
TraesCS1B02G455200	AT1G64110		P-loop containing nucleoside triphosphate hydrolases superfamily protein	LOC_Os05g50750	AAA family ATPase
TraesCS1B02G476400	AT5G07990	CYP75B1	Flavonoid 3'-monooxygenase	LOC_Os10g17260	cytochrome P450
TraesCS1D02G011100	AT4G14440	ECI3	Enoyl-CoA delta isomerase 3	LOC_Os11g16960	carnitine racemase like protein
TraesCS1D02G039800	AT5G02560	HTA12	Probable histone H2A.4	LOC_Os01g31800	Core histone H2A/H2B/H3/H4 domain containing protein
TraesCS1D02G040000	AT3G53620	PPA4	Soluble inorganic pyrophosphatase 4	LOC_Os05g02310	soluble inorganic pyrophosphatase
TraesCS1D02G094700	AT3G62760	GSTF13	Glutathione S-transferase F13	LOC_Os01g27210	glutathione S-transferase
TraesCS1D02G095000	AT3G62760	GSTF13	Glutathione S-transferase F13	LOC_Os05g05620	glutathione S-transferase
TraesCS1D02G107100	AT5G16910	CSLD2	Cellulose synthase-like protein D2	LOC_Os07g36630	CSLF8 - cellulose synthase-like family F; beta1
TraesCS1D02G114500	AT2G46330	AGP16	Arabinogalactan peptide 16	LOC_Os05g12580	expressed protein
TraesCS1D02G141400	AT1G02260		Divalent ion symporter	LOC_Os03g05390	Citrate transporter protein
TraesCS1D02G162800	AT4G12420	SKU5	Monocopper oxidase-like protein SKU5	LOC_Os10g36390	monocopper oxidase
TraesCS1D02G190600	AT1G10360	GSTU18	Glutathione S-transferase U18	LOC_Os10g38730	glutathione S-transferase
TraesCS1D02G194600	AT5G22880	H2B	Histone H2B.10	LOC_Os01g05610	Core histone H2A/H2B/H3/H4 domain containing protein
TraesCS1D02G201200	AT2G02040	NPF8.3	Protein NRT1/ PTR FAMILY 8.3	LOC_Os10g42900	peptide transporter PTR2
TraesCS1D02G202300	AT4G19120	ERD3	Probable methyltransferase PMT21	LOC_Os02g45310	dehydration response related protein
TraesCS1D02G208000	AT1G20330	SMT2	24-methylenesterol C-methyltransferase 2	LOC_Os03g04340	C-methyltransferase
TraesCS1D02G212400	AT5G38710	POX2	Proline dehydrogenase 2%2C mitochondrial	LOC_Os10g40360	proline oxidase
TraesCS1D02G223200	AT2G45050	GATA2	GATA transcription factor 2	LOC_Os10g40810	GATA zinc finger domain containing protein
TraesCS1D02G230900	AT3G16770	RAP2-3	Ethylene-responsive transcription factor RAP2-3	LOC_Os05g29810	AP2 domain containing protein
TraesCS1D02G233300	AT5G22880	H2B	Histone H2B.10	LOC_Os08g38300	Core histone H2A/H2B/H3/H4 domain containing protein
TraesCS1D02G262000	AT1G07660		Histone H4	LOC_Os05g39050	Core histone H2A/H2B/H3/H4 domain containing protein
TraesCS1D02G366300	AT3G46030	HTB11	Histone H2B.7	LOC_Os01g05610	Core histone H2A/H2B/H3/H4 domain containing protein
TraesCS1D02G373900	AT3G46030	HTB11	Histone H2B.7	LOC_Os01g05630	Core histone H2A/H2B/H3/H4 domain containing protein
TraesCS1D02G389900	AT5G45910		GDSL esterase/lipase At5g45910	LOC_Os06g06290	GDSL-like lipase/acylhydrolase
TraesCS1D02G396600	AT5G22880	H2B	Histone H2B.10	LOC_Os08g38300	Core histone H2A/H2B/H3/H4 domain containing protein
TraesCS1D02G404300	AT5G57530	XTH12	Probable xyloglucan endotransglucosylase/hydrolase protein 12	LOC_Os08g13920	glycosyl hydrolases family 16
TraesCS1D02G421900	AT1G52820		2-oxoglutarate (2OG) and Fe(II)-dependent oxygenase superfamily protein	LOC_Os05g50090	oxidoreductase
TraesCS2A02G051600	AT5G54160	OMT1	Flavone 3'-O-methyltransferase 1	LOC_Os08g06100	O-methyltransferase
TraesCS2A02G051700	AT1G06640		1-aminocyclopropane-1-carboxylate oxidase homolog 2	LOC_Os03g48430	1-aminocyclopropane-1-carboxylate oxidase homolog 4
TraesCS2A02G066600	AT1G20190	EXPA11	Expansin-A11	LOC_Os04g15840	expansin precursor
TraesCS2A02G076600	AT4G17260		Lactate/malate dehydrogenase family protein	LOC_Os02g01510	lactate/malate dehydrogenase
TraesCS2A02G104100	AT5G58300		Probable inactive receptor kinase At5g58300	LOC_Os07g48310	inactive receptor kinase At2g26730 precursor
TraesCS2A02G145800	AT3G21240	4CL2	4-coumarate--CoA ligase 2	LOC_Os08g34790	AMP-binding domain containing protein
TraesCS2A02G199600	AT5G06870	PGIP2	Polygalacturonase inhibitor 2	LOC_Os07g38130	polygalacturonase inhibitor 1 precursor
TraesCS2A02G206700	AT4G28100		Uncharacterized GPI-anchored protein At4g28100	LOC_Os07g37156	expressed protein
TraesCS2A02G214700	AT1G54690	HTA3	Probable histone H2AXb	LOC_Os07g36130	core histone H2A/H2B/H3/H4
TraesCS2A02G264500	AT1G27040	NPF4.5	Protein NRT1/ PTR FAMILY 4.5	LOC_Os11g17970	POT family protein
TraesCS2A02G270100				LOC_Os04g21710	expressed protein
TraesCS2A02G271300	AT3G02550	LBD41	LOB domain-containing protein 41	LOC_Os01g32770	DUF260 domain containing protein
TraesCS2A02G290100	AT3G12920	BRG3	Probable BOI-related E3 ubiquitin-protein ligase 3	LOC_Os04g33030	protein binding protein
TraesCS2A02G352000	AT3G07570		Cytochrome b561 and DOMON domain-containing protein At3g07570	LOC_Os04g41810	expressed protein
TraesCS2A02G355800	AT4G25980	PER43	Peroxidase superfamily protein	LOC_Os12g08920	peroxidase precursor
TraesCS2A02G379900	AT3G53420	PIP2-1	Aquaporin PIP2-1	LOC_Os04g44060	aquaporin protein
TraesCS2A02G381100	AT2G37040	PAL1	Phenylalanine ammonia-lyase 1	LOC_Os04g43800	phenylalanine ammonia-lyase
TraesCS2A02G400600	AT1G12740	CYP87A2	cytochrome P450%2C family 87%2C subfamily A%2C polypeptide 2	LOC_Os04g48170	cytochrome P450
TraesCS2A02G453400	AT5G47060		Protein of unknown function (DUF581)	LOC_Os04g49680	DUF581 domain containing protein
TraesCS2A02G455300	AT4G15080	PAT19	Probable protein S-acyltransferase 19	LOC_Os04g49560	zinc finger family protein
TraesCS2A02G461800	AT5G46330	FLS2	LRR receptor-like serine/threonine-protein kinase FLS2	LOC_Os04g52780	leucine-rich repeat receptor protein kinase EXS precursor
TraesCS2A02G467000	AT5G42180	PER64	Peroxidase 64	LOC_Os02g58720	peroxidase precursor
TraesCS2A02G504700	AT2G18890		Protein kinase superfamily protein	LOC_Os04g56060	protein kinase domain containing protein
TraesCS2A02G521500	AT1G74500	PRE3	Transcription factor PRE3	LOC_Os04g54900	bHLH family protein
TraesCS2A02G531600	AT4G10265		Wound-responsive family protein	LOC_Os04g54300	wound induced protein
TraesCS2A02G532200	AT4G10265		Wound-responsive family protein	LOC_Os04g54300	wound induced protein
TraesCS2A02G551100	AT5G62920	ARR6	Two-component response regulator ARR6	LOC_Os04g57720	OsRR6 type-A response regulator
TraesCS2B02G010100	AT1G04180	YUC9	Probable indole-3-pyruvate monooxygenase YUCCA9	LOC_Os04g03980	flavin monooxygenase
TraesCS2B02G072400	AT3G51970	ASAT1	Acyl-CoA--sterol O-acyltransferase 1	LOC_Os04g20880	wax synthase isoform 1
TraesCS2B02G126400	AT2G40435		BEST Arabidopsis thaliana protein match is: transcription regulators (TAIR:AT3G56220.1)%3B Has 289 Blast hits to 289 proteins in 30 species: Archae - 0%3B Bacteria - 0%3B Metazoa - 0%3B Fungi - 0%3B Plants - 289%3B Viruses - 0%3B Other Eukaryotes - 0 (source: NCB /.../k).	LOC_Os07g47960	basic helix-loop-helix domain containing protein
TraesCS2B02G128300	AT3G16660		Pollen Ole e 1 allergen and extensin family protein	LOC_Os07g47750	POEI49 - Pollen Ole e I allergen and extensin family protein precursor
TraesCS2B02G169400	AT2G26770	SCAB1	Stomatal closure-related actin-binding protein 1	LOC_Os07g44830	proline-rich family protein
TraesCS2B02G170800	AT1G31550		GDSL esterase/lipase At1g31550	LOC_Os07g44780	GDSL-like lipase/acylhydrolase
TraesCS2B02G171200	AT3G21240	4CL2	4-coumarate--CoA ligase 2	LOC_Os08g34790	AMP-binding domain containing protein
TraesCS2B02G182500	AT2G30490	CYP73A5	Trans-cinnamate 4-monooxygenase	LOC_Os02g26810	cytochrome P450
TraesCS2B02G186900	AT4G39700		Heavy metal transport/detoxification superfamily protein	LOC_Os03g26650	heavy metal-associated domain containing protein
TraesCS2B02G224000	AT2G37040	PAL1	Phenylalanine ammonia-lyase 1	LOC_Os04g43800	phenylalanine ammonia-lyase
TraesCS2B02G224300	AT2G37040	PAL1	Phenylalanine ammonia-lyase 1	LOC_Os04g43800	phenylalanine ammonia-lyase
TraesCS2B02G226900	AT5G06870	PGIP2	Polygalacturonase inhibitor 2	LOC_Os07g38130	polygalacturonase inhibitor 1 precursor
TraesCS2B02G236500	AT5G16910	CSLD2	Cellulose synthase-like protein D2	LOC_Os07g36750	CSLF3 - cellulose synthase-like family F; beta1
TraesCS2B02G239700	AT1G54690	HTA3	Probable histone H2AXb	LOC_Os07g36130	core histone H2A/H2B/H3/H4
TraesCS2B02G244500	AT1G11545	XTH8	Probable xyloglucan endotransglucosylase/hydrolase protein 8	LOC_Os07g34580	glycosyl hydrolases family 16
TraesCS2B02G273100	AT4G20940		Leucine-rich receptor-like protein kinase family protein	LOC_Os07g05190	leucine-rich repeat family protein
TraesCS2B02G284700	AT2G32300	UCC1	uclacyanin 1	LOC_Os07g01440	plastocyanin-like domain containing protein
TraesCS2B02G289800	AT3G02550	LBD41	LOB domain-containing protein 41	LOC_Os01g32770	DUF260 domain containing protein
TraesCS2B02G300400	AT1G67320		Probable DNA primase large subunit	LOC_Os07g22400	POLA3 - Putative DNA polymerase alpha complex subunit
TraesCS2B02G326200	AT1G59740	NPF4.3	Protein NRT1/ PTR FAMILY 4.3	LOC_Os04g36040	peptide transporter PTR2
TraesCS2B02G338500	AT1G34580	STP5	Sugar transport protein 5	LOC_Os04g38220	transporter family protein
TraesCS2B02G352000	AT5G55480	GDPDL4	Glycerophosphodiester phosphodiesterase GDPDL4	LOC_Os04g39610	glycerophosphoryl diester phosphodiesterase family protein
TraesCS2B02G359400	AT3G48360	BT2	BTB/POZ and TAZ domain-containing protein 2	LOC_Os04g40630	BTBZ4 - Bric-a-Brac
TraesCS2B02G370200	AT3G07570		Cytochrome b561 and DOMON domain-containing protein At3g07570	LOC_Os04g41810	expressed protein
TraesCS2B02G372500	AT4G25980	PER43	Peroxidase superfamily protein	LOC_Os12g08920	peroxidase precursor
TraesCS2B02G378600	AT4G06744		Uncharacterized protein At4g06744	LOC_Os04g42620	uncharacterized protein At4g06744 precursor
TraesCS2B02G396000	AT4G21200	GA2OX8	Gibberellin 2-beta-dioxygenase 8	LOC_Os04g44150	gibberellin 2-beta-dioxygenase 7
TraesCS2B02G398400	AT2G37040	PAL1	Phenylalanine ammonia-lyase 1	LOC_Os04g43800	phenylalanine ammonia-lyase
TraesCS2B02G412600	AT1G33055		unknown protein%3B FUNCTIONS IN: molecular_function unknown%3B INVOLVED IN: anaerobic respiration%3B LOCATED IN: endomembrane system%3B EXPRESSED IN: 13 plant structures%3B EXPRESSED DURING: 6 growth stages%3B Has 20 Blast hits to 20 proteins in 8 species: Arch /.../%3B Bacteria - 0%3B Metazoa - 0%3B Fungi - 0%3B Plants - 20%3B Viruses - 0%3B Other Eukaryotes - 0 (source: NCBI BLink).	LOC_Os07g28614	expressed protein
TraesCS2B02G418700	AT1G12740	CYP87A2	cytochrome P450%2C family 87%2C subfamily A%2C polypeptide 2	LOC_Os04g48170	cytochrome P450
TraesCS2B02G441600	AT5G24600		Protein of unknown function%2C DUF599	LOC_Os08g05780	expressed protein
TraesCS2B02G474800	AT5G47060		Protein of unknown function (DUF581)	LOC_Os04g49680	DUF581 domain containing protein
TraesCS2B02G510200	AT4G03210	XTH9	Xyloglucan endotransglucosylase/hydrolase protein 9	LOC_Os04g53950	glycosyl hydrolases family 16 protein
TraesCS2B02G513900	AT4G10270		Wound-responsive family protein	LOC_Os04g54300	wound induced protein
TraesCS2B02G551700
TraesCS2B02G553100	AT1G02640	BXL2	Probable beta-D-xylosidase 2	LOC_Os11g19210	beta-D-xylosidase
TraesCS2B02G553700			LOC_Os04g54620	expressed protein
TraesCS2B02G561400	AT4G10270		Wound-responsive family protein	LOC_Os04g54280	retrotransposon protein
TraesCS2B02G599900	AT5G44640	BGLU13	Beta-glucosidase 13	LOC_Os04g39880	Os4bglu12 - beta-glucosidase
TraesCS2B02G600200	AT5G44640	BGLU13	Beta-glucosidase 13	LOC_Os04g39880	Os4bglu12 - beta-glucosidase
TraesCS2B02G613900	AT1G71695	PER12	Peroxidase 12	LOC_Os04g59150	peroxidase precursor
TraesCS2D02G032800			ChrUn.fgenesh.mRNA	expressed protein
TraesCS2D02G043500	AT2G42250	CYP712A1	cytochrome P450%2C family 712%2C subfamily A%2C polypeptide 1	LOC_Os04g01140	cytochrome P450 93A2
TraesCS2D02G057000	AT5G24090	CHIB1	Acidic endochitinase	LOC_Os11g47580	glycosyl hydrolase
TraesCS2D02G064900	AT4G39330	CAD9	Probable cinnamyl alcohol dehydrogenase 9	LOC_Os04g15920	dehydrogenase
TraesCS2D02G065000	AT1G20190	EXPA11	Expansin-A11	LOC_Os04g15840	expansin precursor
TraesCS2D02G087500	AT2G38310	PYL4	Abscisic acid receptor PYL4	LOC_Os03g18600	cyclase/dehydrase family protein
TraesCS2D02G101100	AT2G39050		hydroxyproline-rich glycoprotein family protein	LOC_Os07g48490	stress responsive protein
TraesCS2D02G110000	AT3G16770	RAP2-3	Ethylene-responsive transcription factor RAP2-3	LOC_Os07g47790	AP2 domain containing protein
TraesCS2D02G150400	AT3G21240	4CL2	4-coumarate--CoA ligase 2	LOC_Os08g34790	AMP-binding domain containing protein
TraesCS2D02G155000
TraesCS2D02G204400	AT3G53260	PAL2	Phenylalanine ammonia-lyase 2	LOC_Os04g43800	phenylalanine ammonia-lyase
TraesCS2D02G204700	AT2G37040	PAL1	Phenylalanine ammonia-lyase 1	LOC_Os04g43800	phenylalanine ammonia-lyase
TraesCS2D02G207200	AT5G06870	PGIP2	Polygalacturonase inhibitor 2	LOC_Os07g38130	polygalacturonase inhibitor 1 precursor
TraesCS2D02G217100	AT5G16910	CSLD2	Cellulose synthase-like protein D2	LOC_Os07g36750	CSLF3 - cellulose synthase-like family F; beta1
TraesCS2D02G218700	AT2G37040	PAL1	Phenylalanine ammonia-lyase 1	LOC_Os04g43800	phenylalanine ammonia-lyase
TraesCS2D02G220500	AT1G54690	HTA3	Probable histone H2AXb	LOC_Os07g36130	core histone H2A/H2B/H3/H4
TraesCS2D02G224300	AT1G11545	XTH8	Probable xyloglucan endotransglucosylase/hydrolase protein 8	LOC_Os07g34580	glycosyl hydrolases family 16
TraesCS2D02G241800	AT5G49160	DMT1	DNA (cytosine-5)-methyltransferase 1	LOC_Os07g08500	C-5 cytosine-specific DNA methylase
TraesCS2D02G259400	AT1G27040	NPF4.5	Protein NRT1/ PTR FAMILY 4.5	LOC_Os11g18044	peptide transporter PTR2
TraesCS2D02G270100	AT3G02550	LBD41	LOB domain-containing protein 41	LOC_Os01g32770	DUF260 domain containing protein
TraesCS2D02G274900	AT2G31980	CYS2	Cysteine proteinase inhibitor 2	LOC_Os04g28250	cysteine proteinase inhibitor precursor
TraesCS2D02G297000	AT1G09200	HTR2	Histone H3.2	LOC_Os01g64640	histone H3
TraesCS2D02G321800	AT5G15140		Galactose mutarotase-like superfamily protein	LOC_Os02g36600	aldose 1-epimerase
TraesCS2D02G322800	AT4G05190	ATK5	Kinesin-5	LOC_Os04g53760	kinesin motor domain containing protein
TraesCS2D02G332500	AT5G55480	GDPDL4	Glycerophosphodiester phosphodiesterase GDPDL4	LOC_Os04g39610	glycerophosphoryl diester phosphodiesterase family protein
TraesCS2D02G337000	AT4G24710		P-loop containing nucleoside triphosphate hydrolases superfamily protein	LOC_Os04g40290	AAA-type ATPase family protein
TraesCS2D02G339700	AT3G48360	BT2	BTB/POZ and TAZ domain-containing protein 2	LOC_Os04g40630	BTBZ4 - Bric-a-Brac
TraesCS2D02G350200	AT3G07570		Cytochrome b561 and DOMON domain-containing protein At3g07570	LOC_Os04g41810	expressed protein
TraesCS2D02G358200	AT4G06744		Uncharacterized protein At4g06744	LOC_Os04g42620	uncharacterized protein At4g06744 precursor
TraesCS2D02G375300	AT4G21200	GA2OX8	Gibberellin 2-beta-dioxygenase 8	LOC_Os04g44150	gibberellin 2-beta-dioxygenase 7
TraesCS2D02G377500	AT2G37040	PAL1	Phenylalanine ammonia-lyase 1	LOC_Os04g43800	phenylalanine ammonia-lyase
TraesCS2D02G377600	AT2G37040	PAL1	Phenylalanine ammonia-lyase 1	LOC_Os04g43800	phenylalanine ammonia-lyase
TraesCS2D02G395200	AT2G18050	HIS1-3	histone H1-3	LOC_Os04g18090	histone H1
TraesCS2D02G417100	AT4G38810		Calcium-binding EF-hand family protein	LOC_Os10g09850	EF hand family protein
TraesCS2D02G433600	AT5G13140		Pollen Ole e 1 allergen and extensin family protein	LOC_Os12g28770	POEI19 - Pollen Ole e I allergen and extensin family protein precursor
TraesCS2D02G443000	AT2G34830	WRKY35	Probable WRKY transcription factor 35	LOC_Os04g50920	WRKY37
TraesCS2D02G444300	AT1G79180	ATMYB63	myb domain protein 63	LOC_Os04g50770	MYB family transcription factor
TraesCS2D02G453100	AT5G47060		Protein of unknown function (DUF581)	LOC_Os04g49680	DUF581 domain containing protein
TraesCS2D02G453200	AT5G47060		Protein of unknown function (DUF581)	LOC_Os04g49680	DUF581 domain containing protein
TraesCS2D02G453300	AT5G47060		Protein of unknown function (DUF581)	LOC_Os04g49680	DUF581 domain containing protein
TraesCS2D02G461100
TraesCS2D02G484000	AT4G03210	XTH9	Xyloglucan endotransglucosylase/hydrolase protein 9	LOC_Os04g53950	glycosyl hydrolases family 16 protein
TraesCS2D02G525300	AT1G02640	BXL2	Probable beta-D-xylosidase 2	LOC_Os11g19210	beta-D-xylosidase
TraesCS2D02G564700	AT3G16570	RALF23	Rapid alkalinization factor 23	LOC_Os11g26880	RALFL14 - Rapid ALkalinization Factor RALF family protein precursor
TraesCS2D02G594400	AT5G44640	BGLU13	Beta-glucosidase 13	LOC_Os04g39880	Os4bglu12 - beta-glucosidase
TraesCS3A02G045500				LOC_Os01g03680	BBTI8 - Bowman-Birk type bran trypsin inhibitor precursor
TraesCS3A02G084800	AT2G45510	CYP704A2	cytochrome P450%2C family 704%2C subfamily A%2C polypeptide 2	LOC_Os04g48460	cytochrome P450
TraesCS3A02G105600	AT2G26180	IQD6	IQ-domain 6	LOC_Os01g09790	IQ calmodulin-binding motif domain containing protein
TraesCS3A02G116400	AT3G10040		sequence-specific DNA binding transcription factors	LOC_Os01g21590	homeodomain
TraesCS3A02G119500	AT3G62160		HXXXD-type acyl-transferase family protein	LOC_Os01g08380	transferase family protein
TraesCS3A02G141300	AT5G45910		GDSL esterase/lipase At5g45910	LOC_Os01g11710	GDSL-like lipase/acylhydrolase
TraesCS3A02G177700	AT1G55550		P-loop containing nucleoside triphosphate hydrolases superfamily protein	LOC_Os01g15540	kinesin motor domain containing protein
TraesCS3A02G180200	AT2G18150	PER15	Peroxidase 15	LOC_Os01g15830	peroxidase precursor
TraesCS3A02G185900	AT2G39040	PER24	Peroxidase 24	LOC_Os01g16450	peroxidase precursor
TraesCS3A02G233000	AT1G14920	GAI	DELLA protein GAI	LOC_Os01g45860	GRAS family transcription factor domain containing protein
TraesCS3A02G238300	AT5G53290	CRF3	Ethylene-responsive transcription factor CRF3	LOC_Os01g46870	AP2 domain containing protein
TraesCS3A02G255100	AT4G36470		S-adenosyl-L-methionine-dependent methyltransferases superfamily protein	LOC_Os01g50610	SAM dependent carboxyl methyltransferase
TraesCS3A02G260100	AT3G12500	CHI-B	Basic endochitinase B	LOC_Os06g51060	CHIT8 - Chitinase family protein precursor
TraesCS3A02G260200	AT3G12500	CHI-B	Basic endochitinase B	LOC_Os06g51050	CHIT7 - Chitinase family protein precursor
TraesCS3A02G268100	AT3G12700		Eukaryotic aspartyl protease family protein	LOC_Os05g48330	aspartyl protease family protein
TraesCS3A02G275900	AT3G16490	IQD26	IQ-domain 26	LOC_Os01g53980	IQ calmodulin-binding motif family protein
TraesCS3A02G293700	AT3G58120	BZIP61	Basic leucine zipper 61	LOC_Os01g55150	bZIP transcription factor domain containing protein
TraesCS3A02G303200	AT3G02230	RGP1	UDP-arabinopyranose mutase 1	LOC_Os03g40270	alpha-1
TraesCS3A02G305600	AT1G52240	ATROPGEF11	RHO guanyl-nucleotide exchange factor 11	LOC_Os01g55510	dynein light chain type 1 domain containing protein
TraesCS3A02G328700	AT3G12710		DNA glycosylase superfamily protein	LOC_Os01g58550	methyladenine glycosylase
TraesCS3A02G352200	AT3G07990	SCPL27	Serine carboxypeptidase-like 27	LOC_Os01g61690	OsSCP5 - Putative Serine Carboxypeptidase homologue
TraesCS3A02G357400	AT5G22880	H2B	Histone H2B.10	LOC_Os08g38300	Core histone H2A/H2B/H3/H4 domain containing protein
TraesCS3A02G357500	AT5G22880	H2B	Histone H2B.10	LOC_Os08g38300	Core histone H2A/H2B/H3/H4 domain containing protein
TraesCS3A02G377400	AT1G09200	HTR2	Histone H3.2	LOC_Os01g64640	histone H3
TraesCS3A02G386300	AT4G26140	BGAL12	Beta-galactosidase 12	LOC_Os03g15020	beta-galactosidase precursor
TraesCS3A02G411700	AT1G03230		Eukaryotic aspartyl protease family protein	LOC_Os01g71090	xylanase inhibitor
TraesCS3A02G460900	AT3G26700		Protein kinase superfamily protein	LOC_Os01g70970	protein kinase
TraesCS3A02G483000	AT4G16260		Glycosyl hydrolase superfamily protein	LOC_Os01g71670	glycosyl hydrolases family 17
TraesCS3A02G495400	AT3G28040		Probably inactive leucine-rich repeat receptor-like protein kinase At3g28040	LOC_Os01g72700	expressed protein
TraesCS3A02G497200
TraesCS3B02G041700	AT1G68560	XYL1	Alpha-xylosidase 1	LOC_Os01g03950	glycosyl hydrolase
TraesCS3B02G041800				LOC_Os01g03980	expressed protein
TraesCS3B02G108700	AT5G57550	XTH25	Probable xyloglucan endotransglucosylase/hydrolase protein 25	LOC_Os08g13920	glycosyl hydrolases family 16
TraesCS3B02G108800	AT5G57550	XTH25	Probable xyloglucan endotransglucosylase/hydrolase protein 25	LOC_Os08g13920	glycosyl hydrolases family 16
TraesCS3B02G114600	AT5G22880	H2B	Histone H2B.10	LOC_Os01g05630	Core histone H2A/H2B/H3/H4 domain containing protein
TraesCS3B02G141100	AT4G37110		Zinc-finger domain of monoamine-oxidase A repressor R1	LOC_Os11g36030	protein binding protein
TraesCS3B02G141800	AT1G15550	GA3OX1	Gibberellin 3-beta-dioxygenase 1	LOC_Os01g08220	gibberellin 3-beta-dioxygenase 2-2
TraesCS3B02G145500	AT3G62270	BOR2	Probable boron transporter 2	LOC_Os01g08020	boron transporter protein
TraesCS3B02G164500	AT3G15030	TCP4	Transcription factor TCP4	LOC_Os01g11550	TCP family transcription factor
TraesCS3B02G168300	AT3G14920		Peptide-N4-(N-acetyl-beta-glucosaminyl)asparagine amidase A protein	LOC_Os01g10950	peptide-N4-asparagine amidase A
TraesCS3B02G173900	AT4G11150	VHA-E1	V-type proton ATPase subunit E1	LOC_Os01g12260	vacuolar ATP synthase subunit E
TraesCS3B02G209900	AT2G18150	PER15	Peroxidase 15	LOC_Os01g15830	peroxidase precursor
TraesCS3B02G212400				LOC_Os01g16140	expressed protein
TraesCS3B02G243500	AT4G13340	LRX3	Leucine-rich repeat extensin-like protein 3	LOC_Os01g41120	retrotransposon protein
TraesCS3B02G262400	AT1G14920	GAI	DELLA protein GAI	LOC_Os01g45860	GRAS family transcription factor domain containing protein
TraesCS3B02G266800	AT4G23750	CRF2	Ethylene-responsive transcription factor CRF2	LOC_Os01g46870	AP2 domain containing protein
TraesCS3B02G287100	AT4G36470		S-adenosyl-L-methionine-dependent methyltransferases superfamily protein	LOC_Os01g50610	SAM dependent carboxyl methyltransferase
TraesCS3B02G293200	AT3G12500	CHI-B	Basic endochitinase B	LOC_Os06g51050	CHIT7 - Chitinase family protein precursor
TraesCS3B02G322900	AT3G24450		Heavy metal transport/detoxification superfamily protein	LOC_Os01g52160	heavy metal-associated domain containing protein
TraesCS3B02G328400	AT3G58120	BZIP61	Basic leucine zipper 61	LOC_Os01g55150	bZIP transcription factor domain containing protein
TraesCS3B02G352700	AT4G21380	SD18	Receptor-like serine/threonine-protein kinase SD1-8	LOC_Os01g57510	receptor protein kinase
TraesCS3B02G359100	AT3G12710		DNA glycosylase superfamily protein	LOC_Os01g58550	methyladenine glycosylase
TraesCS3B02G361500	AT5G15100	PIN5	Putative auxin efflux carrier component 5	LOC_Os01g58860	auxin efflux carrier component
TraesCS3B02G390000	AT5G22880	H2B	Histone H2B.10	LOC_Os01g05610	Core histone H2A/H2B/H3/H4 domain containing protein
TraesCS3B02G396200	AT3G46830	RABA2C	Ras-related protein RABA2c	LOC_Os01g62950	ras-related protein
TraesCS3B02G413400	AT1G77600		ARM repeat superfamily protein	LOC_Os01g64900	HEAT
TraesCS3B02G414800	AT1G22540	NPF5.10	Protein NRT1/ PTR FAMILY 5.10	LOC_Os01g65100	peptide transporter
TraesCS3B02G418500	AT3G08910		DNAJ heat shock family protein	LOC_Os01g65480	dnaJ domain containing protein
TraesCS3B02G420700	AT1G58360	AAP1	Amino acid permease 1	LOC_Os01g65670	amino acid transporter
TraesCS3B02G422400	AT5G14360		Ubiquitin-like superfamily protein	LOC_Os01g67950	ubiquitin family protein
TraesCS3B02G468300	AT4G22190		unknown protein%3B Has 283 Blast hits to 154 proteins in 44 species: Archae - 0%3B Bacteria - 2%3B Metazoa - 24%3B Fungi - 12%3B Plants - 48%3B Viruses - 0%3B Other Eukaryotes - 197 (source: NCBI BLink).	LOC_Os01g69290	antifreeze glycoprotein
TraesCS3B02G488100	AT5G48930	HST	Shikimate O-hydroxycinnamoyltransferase	LOC_Os08g43040	transferase family protein
TraesCS3B02G558400	AT1G23480	CSLA3	Probable mannan synthase 3	LOC_Os08g33740	CSLA11 - cellulose synthase-like family A
TraesCS3B02G586300	AT3G19430		late embryogenesis abundant protein-related / LEA protein-related	LOC_Os01g73700	RCLEA2 - Root cap and Late embryogenesis related family protein precursor
TraesCS3D02G068900	AT3G06400	CHR11	Putative chromatin-remodeling complex ATPase chain	LOC_Os01g27040	chromatin-remodeling complex ATPase chain
TraesCS3D02G075900	AT5G22880	H2B	Histone H2B.10	LOC_Os01g05630	Core histone H2A/H2B/H3/H4 domain containing protein
TraesCS3D02G174300	AT1G78520		Carbohydrate-binding X8 domain superfamily protein	LOC_Os01g14140	X8 domain containing protein
TraesCS3D02G185100	AT2G18150	PER15	Peroxidase 15	LOC_Os01g15830	peroxidase precursor
TraesCS3D02G203400	AT2G16440	MCM4	DNA replication licensing factor MCM4	LOC_Os01g36390	MCM4 - Putative minichromosome maintenance MCM complex subunit 4
TraesCS3D02G221000				LOC_Os01g45700	expressed protein
TraesCS3D02G224000	AT2G18360		alpha/beta-Hydrolases superfamily protein	LOC_Os01g44960	hydrolase
TraesCS3D02G225200	AT2G42960		Probable receptor-like protein kinase At2g42960	LOC_Os01g44110	serine/threonine-protein kinase
TraesCS3D02G244900	AT5G03170	FLA11	Fasciclin-like arabinogalactan protein 11	LOC_Os01g47780	fasciclin domain containing protein
TraesCS3D02G256000	AT4G36470		S-adenosyl-L-methionine-dependent methyltransferases superfamily protein	LOC_Os01g50610	SAM dependent carboxyl methyltransferase
TraesCS3D02G293500	AT3G58120	BZIP61	Basic leucine zipper 61	LOC_Os01g55150	bZIP transcription factor domain containing protein
TraesCS3D02G300600	AT2G23170	GH3.3	Indole-3-acetic acid-amido synthetase GH3.3	LOC_Os07g40290	OsGH3.8 - Probable indole-3-acetic acid-amido synthetase
TraesCS3D02G316900	AT4G21380	SD18	Receptor-like serine/threonine-protein kinase SD1-8	LOC_Os01g57510	receptor protein kinase
TraesCS3D02G340800	AT1G07660		Histone H4	LOC_Os05g39050	Core histone H2A/H2B/H3/H4 domain containing protein
TraesCS3D02G346200	AT3G07990	SCPL27	Serine carboxypeptidase-like 27	LOC_Os01g61690	OsSCP5 - Putative Serine Carboxypeptidase homologue
TraesCS3D02G360900	AT5G01210		HXXXD-type acyl-transferase family protein	LOC_Os01g63480	transferase family protein
TraesCS3D02G361300	AT2G38110	GPAT6	Glycerol-3-phosphate 2-O-acyltransferase 6	LOC_Os01g63580	glycerol-3-phosphate acyltransferase
TraesCS3D02G364300	AT2G27690	CYP94C1	Cytochrome P450 94C1	LOC_Os01g63930	cytochrome P450
TraesCS3D02G373800	AT1G77600		ARM repeat superfamily protein	LOC_Os01g64900	HEAT
TraesCS3D02G425600				LOC_Os01g69290	antifreeze glycoprotein
TraesCS4A02G015500				LOC_Os03g07590	expressed protein
TraesCS4A02G015600				LOC_Os03g07590	expressed protein
TraesCS4A02G016600	AT1G69780	ATHB-13	Homeobox-leucine zipper protein ATHB-13	LOC_Os03g07450	homeobox associated leucine zipper
TraesCS4A02G067900	AT1G32860		Glucan endo-1%2C3-beta-glucosidase 11	LOC_Os03g14210	glycosyl hydrolases family 17
TraesCS4A02G071100	AT4G38650		Glycosyl hydrolase family 10 protein	LOC_Os03g14010	glycosyl hydrolase family 10 protein
TraesCS4A02G100100	AT5G02560	HTA12	Probable histone H2A.4	LOC_Os05g02300	Core histone H2A/H2B/H3/H4 domain containing protein
TraesCS4A02G106800	AT3G54770	ARP1	Probable RNA-binding protein ARP1	LOC_Os03g17760	RNA recognition motif containing protein
TraesCS4A02G116400				LOC_Os03g18850	pathogenesis-related Bet v I family protein
TraesCS4A02G170900	AT5G49360	BXL1	Beta-D-xylosidase 1	LOC_Os11g44950	glycosyl hydrolase family 3 protein
TraesCS4A02G175400	AT2G24440		selenium binding	LOC_Os11g47770	selT/selW/selH selenoprotein domain containing protein
TraesCS4A02G196400	AT5G05340	PER52	Peroxidase 52	LOC_Os11g02130	peroxidase precursor
TraesCS4A02G238500	AT5G50300	AZG2	Adenine/guanine permease AZG2	LOC_Os11g24060	permease domain containing protein
TraesCS4A02G263200	AT1G73480		alpha/beta-Hydrolases superfamily protein	LOC_Os03g51010	hydrolase
TraesCS4A02G264400	AT3G18780	ACT2	Actin-2	LOC_Os01g64630	actin
TraesCS4A02G270800	AT2G06925	PLA2-ALPHA	Phospholipase A2-alpha	LOC_Os03g50030	phospholipase A2
TraesCS4A02G272900	AT3G18080	BGLU44	Beta-glucosidase 44	LOC_Os07g46280	Os7bglu26 - beta-mannosidase/glucosidase/exoglucanase
TraesCS4A02G295300	AT3G22550		Protein of unknown function (DUF581)	LOC_Os03g46260	DUF581 domain containing protein
TraesCS4A02G300400	AT3G03680		C2 calcium/lipid-binding plant phosphoribosyltransferase family protein	LOC_Os05g30750	anthranilate phosphoribosyltransferase
TraesCS4A02G313200	AT1G04610	YUC3	Probable indole-3-pyruvate monooxygenase YUCCA3	LOC_Os07g25540	flavin monooxygenase
TraesCS4A02G410800	AT2G36830	TIP1-1	Aquaporin TIP1-1	LOC_Os03g05290	aquaporin protein
TraesCS4A02G442700	AT1G22360	UGT85A2	UDP-glycosyltransferase 85A2	LOC_Os04g25380	cytokinin-O-glucosyltransferase 2
TraesCS4A02G485900	AT1G62660	BFRUCT3	Acid beta-fructofuranosidase 3%2C vacuolar	LOC_Os02g01590	glycosyl hydrolases
TraesCS4A02G486000	AT1G62660	BFRUCT3	Acid beta-fructofuranosidase 3%2C vacuolar	LOC_Os02g01590	glycosyl hydrolases
TraesCS4B02G013400	AT3G03680		C2 calcium/lipid-binding plant phosphoribosyltransferase family protein	LOC_Os05g30750	anthranilate phosphoribosyltransferase
TraesCS4B02G018400	AT3G22550		Protein of unknown function (DUF581)	LOC_Os03g46260	DUF581 domain containing protein
TraesCS4B02G032000	AT2G28150		Domain of unknown function (DUF966)	LOC_Os03g48600	domain of unknown function DUF966 domain containing protein
TraesCS4B02G059100	AT3G62760	GSTF13	Glutathione S-transferase F13	LOC_Os01g27260	glutathione S-transferase
TraesCS4B02G127100	AT5G64570	BXL4	Beta-D-xylosidase 4	LOC_Os11g18730	glycosyl hydrolase family 3 protein
TraesCS4B02G187800				LOC_Os03g18850	pathogenesis-related Bet v I family protein
TraesCS4B02G189800	AT2G38310	PYL4	Abscisic acid receptor PYL4	LOC_Os03g18600	cyclase/dehydrase family protein
TraesCS4B02G191300	AT3G63530	BB	E3 ubiquitin ligase BIG BROTHER	LOC_Os03g07790	zinc finger
TraesCS4B02G204100	AT5G02560	HTA12	Probable histone H2A.4	LOC_Os05g02300	Core histone H2A/H2B/H3/H4 domain containing protein
TraesCS4B02G227000	AT4G38650		Glycosyl hydrolase family 10 protein	LOC_Os03g14010	glycosyl hydrolase family 10 protein
TraesCS4B02G243300	AT1G05370		Sec14p-like phosphatidylinositol transfer family protein	LOC_Os03g11950	SEC14 cytosolic factor family protein
TraesCS4B02G287600	AT1G69780	ATHB-13	Homeobox-leucine zipper protein ATHB-13	LOC_Os03g07450	homeobox associated leucine zipper
TraesCS4B02G288400				LOC_Os03g07590	expressed protein
TraesCS4B02G289700	AT3G52110		unknown protein%3B Has 191 Blast hits to 174 proteins in 54 species: Archae - 0%3B Bacteria - 7%3B Metazoa - 45%3B Fungi - 7%3B Plants - 40%3B Viruses - 0%3B Other Eukaryotes - 92 (source: NCBI BLink).	LOC_Os03g07810	expressed protein
TraesCS4B02G304600
TraesCS4B02G305200
TraesCS4B02G310900	AT2G36830	TIP1-1	Aquaporin TIP1-1	LOC_Os03g05290	aquaporin protein
TraesCS4B02G323400	AT5G48485	DIR1	Putative lipid-transfer protein DIR1	LOC_Os07g18750	LTPL42 - Protease inhibitor/seed storage/LTP family protein precursor
TraesCS4B02G324000	AT2G02130	PDF2.3	Defensin-like protein 1	LOC_Os03g03810	DEF8 - Defensin and Defensin-like DEFL family
TraesCS4B02G335300	AT4G25310		2-oxoglutarate (2OG) and Fe(II)-dependent oxygenase superfamily protein	LOC_Os03g63900	1-aminocyclopropane-1-carboxylate oxidase 2
TraesCS4B02G367600	AT1G62510		Bifunctional inhibitor/lipid-transfer protein/seed storage 2S albumin superfamily protein	LOC_Os03g01320	LTPL116 - Protease inhibitor/seed storage/LTP family protein precursor
TraesCS4B02G374400	AT3G60530	GATA4	GATA transcription factor 4	LOC_Os10g40810	GATA zinc finger domain containing protein
TraesCS4B02G399500	AT1G64640	ENODL8	early nodulin-like protein 8	LOC_Os03g02400	plastocyanin-like domain containing protein
TraesCS4D02G011200	AT3G03680		C2 calcium/lipid-binding plant phosphoribosyltransferase family protein	LOC_Os05g30750	anthranilate phosphoribosyltransferase
TraesCS4D02G018800	AT2G22770	NAI1	Transcription factor NAI1	LOC_Os03g46860	helix-loop-helix DNA-binding protein
TraesCS4D02G038500	AT3G18080	BGLU44	Beta-glucosidase 44	LOC_Os03g49600	Os3bglu7 - beta-glucosidase
TraesCS4D02G039900	AT5G22090		Protein FAF-like%2C chloroplastic	LOC_Os03g49830	expressed protein
TraesCS4D02G050600	AT5G15490	UGD3	UDP-glucose 6-dehydrogenase 3	LOC_Os12g25690	UDP-glucose 6-dehydrogenase
TraesCS4D02G054600	AT1G63850		BTB/POZ domain-containing protein At1g63850	LOC_Os03g51380	expressed protein
TraesCS4D02G056900	AT2G22750	BHLH18	Transcription factor bHLH18	LOC_Os03g51580	helix-loop-helix DNA-binding domain containing protein
TraesCS4D02G061600	AT3G14920		Peptide-N4-(N-acetyl-beta-glucosaminyl)asparagine amidase A protein	LOC_Os01g10960	peptide-N4-asparagine amidase A
TraesCS4D02G066100	AT1G08560	KN	Syntaxin-related protein KNOLLE	LOC_Os03g52650	syntaxin-related protein
TraesCS4D02G074900	AT5G50300	AZG2	Adenine/guanine permease AZG2	LOC_Os11g24060	permease domain containing protein
TraesCS4D02G075000	AT1G67590		Remorin family protein	LOC_Os03g02840	remorin family protein
TraesCS4D02G092000	AT1G71960	ABCG25	ABC transporter G family member 25	LOC_Os11g07600	ABC-2 type transporter domain containing protein
TraesCS4D02G143900	AT5G64570	BXL4	Beta-D-xylosidase 4	LOC_Os11g18730	glycosyl hydrolase family 3 protein
TraesCS4D02G178800	AT5G46170		F-box protein At5g46170	LOC_Os03g20500	OsFBX82 - F-box domain containing protein
TraesCS4D02G186500	AT3G62550		Adenine nucleotide alpha hydrolases-like superfamily protein	LOC_Os03g19270	universal stress protein domain containing protein
TraesCS4D02G186900	AT4G02100		Heat shock protein DnaJ with tetratricopeptide repeat	LOC_Os03g19200	DNAJ heat shock N-terminal domain-containing protein
TraesCS4D02G189200				LOC_Os03g18850	pathogenesis-related Bet v I family protein
TraesCS4D02G191200	AT2G38310	PYL4	Abscisic acid receptor PYL4	LOC_Os03g18600	cyclase/dehydrase family protein
TraesCS4D02G198000	AT3G54770	ARP1	Probable RNA-binding protein ARP1	LOC_Os03g17760	RNA recognition motif containing protein
TraesCS4D02G227200	AT2G21050	LAX2	Auxin transporter-like protein 2	LOC_Os01g63770	transmembrane amino acid transporter protein
TraesCS4D02G241100	AT3G17840	RLK902	Probable inactive receptor kinase RLK902	LOC_Os03g12250	atypical receptor-like kinase MARK
TraesCS4D02G242100	AT3G25900	HMT-1	Homocysteine S-methyltransferase 1	LOC_Os03g12110	homocysteine S-methyltransferase protein
TraesCS4D02G287300				LOC_Os03g07590	expressed protein
TraesCS4D02G303000
TraesCS4D02G319600	AT5G48485	DIR1	Putative lipid-transfer protein DIR1	LOC_Os07g18750	LTPL42 - Protease inhibitor/seed storage/LTP family protein precursor
TraesCS4D02G321000	AT2G02130	PDF2.3	Defensin-like protein 1	LOC_Os03g03810	DEF8 - Defensin and Defensin-like DEFL family
TraesCS4D02G327700	AT2G30870	GSTF10	Glutathione S-transferase F10	LOC_Os03g04220	glutathione S-transferase
TraesCS4D02G348000				LOC_Os03g02660	expressed protein
TraesCS4D02G352200	AT5G07390	RBOHA	Respiratory burst oxidase homolog protein A	LOC_Os12g35610	respiratory burst oxidase
TraesCS4D02G360100	AT2G45180		Bifunctional inhibitor/lipid-transfer protein/seed storage 2S albumin superfamily protein	LOC_Os04g46830	LTPL122 - Protease inhibitor/seed storage/LTP family protein precursor
TraesCS4D02G361900	AT1G65680	EXPB2	Putative expansin-B2	LOC_Os10g40730	expansin precursor
TraesCS4D02G362800	AT2G45050	GATA2	GATA transcription factor 2	LOC_Os10g40810	GATA zinc finger domain containing protein
TraesCS5A02G100000	AT2G37170	PIP2-2	Aquaporin PIP2-2	LOC_Os07g26630	aquaporin protein
TraesCS5A02G129500	AT2G27690	CYP94C1	Cytochrome P450 94C1	LOC_Os12g05440	cytochrome P450
TraesCS5A02G168200	AT3G07720		Galactose oxidase/kelch repeat superfamily protein	LOC_Os09g07460	kelch repeat protein
TraesCS5A02G169500	AT5G48220		Aldolase-type TIM barrel family protein	LOC_Os09g08130	indole-3-glycerol phosphate synthase
TraesCS5A02G213300	AT1G72490		unknown protein%3B BEST Arabidopsis thaliana protein match is: unknown protein (TAIR:AT1G17400.1)%3B Has 75 Blast hits to 75 proteins in 21 species: Archae - 0%3B Bacteria - 0%3B Metazoa - 3%3B Fungi - 4%3B Plants - 58%3B Viruses - 0%3B Other Eukaryotes - 10 (sourc /.../I BLink).	LOC_Os09g26840	expressed protein
TraesCS5A02G221900	AT1G79720		Eukaryotic aspartyl protease family protein	LOC_Os09g25570	aspartic proteinase
TraesCS5A02G234300	AT1G05010	ACO4	1-aminocyclopropane-1-carboxylate oxidase 4	LOC_Os09g27820	1-aminocyclopropane-1-carboxylate oxidase protein
TraesCS5A02G242300	AT1G47480	CXE2	Probable carboxylesterase 2	LOC_Os09g28690	gibberellin receptor GID1L2
TraesCS5A02G246800	AT5G65420	CYCD4-1	Cyclin-D4-1	LOC_Os09g29100	cyclin
TraesCS5A02G265800	AT1G26560	BGLU40	Beta-glucosidase 40	LOC_Os09g31410	Os9bglu29 - beta-glucosidase homologue
TraesCS5A02G268200	AT1G76470		NAD(P)-binding Rossmann-fold superfamily protein	LOC_Os09g31490	reductase
TraesCS5A02G288200	AT5G14130	PER55	Peroxidase 55	LOC_Os09g32964	peroxidase precursor
TraesCS5A02G314600	AT2G47520	ERF071	Ethylene-responsive transcription factor ERF071	LOC_Os01g21120	AP2 domain containing protein
TraesCS5A02G330600
TraesCS5A02G337400	AT3G14390	LYSA1	Diaminopimelate decarboxylase 1%2C chloroplastic	LOC_Os09g37120	pyridoxal-dependent decarboxylase protein
TraesCS5A02G352100	AT3G51880	HMGB1	High mobility group B protein 1	LOC_Os09g37910	HMG1/2
TraesCS5A02G353600	AT1G07660		Histone H4	LOC_Os05g39050	Core histone H2A/H2B/H3/H4 domain containing protein
TraesCS5A02G375600	AT4G21120	CAT1	Cationic amino acid transporter 1	LOC_Os12g41890	amino acid permease family protein
TraesCS5A02G403400	AT5G66560		BTB/POZ domain-containing protein At5g66560	LOC_Os03g55830	BTBN10 - Bric-a-Brac
TraesCS5A02G444300	AT2G18050	HIS1-3	histone H1-3	LOC_Os03g58470	retrotransposon protein
TraesCS5A02G460600	AT1G75150		unknown protein%3B Has 38228 Blast hits to 24529 proteins in 1168 species: Archae - 169%3B Bacteria - 4103%3B Metazoa - 14594%3B Fungi - 5866%3B Plants - 1861%3B Viruses - 317%3B Other Eukaryotes - 11318 (source: NCBI BLink).	LOC_Os03g59480	expressed protein
TraesCS5A02G478500	AT5G59880	ADF3	Actin-depolymerizing factor 3	LOC_Os03g60580	actin-depolymerizing factor
TraesCS5A02G486800	AT3G11340		UDP-Glycosyltransferase superfamily protein	LOC_Os03g60960	cytokinin-N-glucosyltransferase 1
TraesCS5A02G495400	AT5G48485	DIR1	Putative lipid-transfer protein DIR1	LOC_Os07g18750	LTPL42 - Protease inhibitor/seed storage/LTP family protein precursor
TraesCS5A02G503300	AT5G65640	BHLH93	Transcription factor bHLH93	LOC_Os03g04310	BHLH transcription factor
TraesCS5A02G526000	AT1G63120	ATRBL2	RHOMBOID-like 2	LOC_Os03g02530	OsRhmbd7 - Putative Rhomboid homologue
TraesCS5A02G538600	AT2G45050	GATA2	GATA transcription factor 2	LOC_Os10g40810	GATA zinc finger domain containing protein
TraesCS5B02G088500	AT2G28790		Pathogenesis-related thaumatin superfamily protein	LOC_Os12g38120	thaumatin family domain containing protein
TraesCS5B02G097900	AT3G03080		Zinc-binding dehydrogenase family protein	LOC_Os12g12590	NADP-dependent oxidoreductase
TraesCS5B02G142200	AT3G58120	BZIP61	Basic leucine zipper 61	LOC_Os02g14910	bZIP transcription factor family protein
TraesCS5B02G165000	AT3G07720		Galactose oxidase/kelch repeat superfamily protein	LOC_Os09g07460	kelch repeat protein
TraesCS5B02G170100	AT2G05990	MOD1	Enoyl-	LOC_Os09g10600	enoyl-acyl-carrier-protein reductase NADH
TraesCS5B02G199100	AT1G70210	CYCD1-1	Cyclin-D1-1	LOC_Os08g32540	cyclin
TraesCS5B02G224200	AT2G24260	BHLH66	Transcription factor bHLH66	LOC_Os09g25040	joka8
TraesCS5B02G236100	AT1G46264	HSFB4	Heat stress transcription factor B-4	LOC_Os09g28200	HSF-type DNA-binding domain containing protein
TraesCS5B02G240200	AT1G47480	CXE2	Probable carboxylesterase 2	LOC_Os09g28690	gibberellin receptor GID1L2
TraesCS5B02G243900	AT5G10440	CYCD4-2	Cyclin-D4-2	LOC_Os09g29100	cyclin
TraesCS5B02G335500	AT1G65470	FAS1	Chromatin assembly factor 1 subunit FAS1	LOC_Os01g67100	expressed protein
TraesCS5B02G355900	AT1G07750		RmlC-like cupins superfamily protein	LOC_Os09g37976	cupin domain containing protein
TraesCS5B02G386800	AT3G04730	IAA16	Auxin-responsive protein IAA16	LOC_Os03g53150	OsIAA13 - Auxin-responsive Aux/IAA gene family member
TraesCS5B02G389500	AT5G11460		Protein of unknown function (DUF581)	LOC_Os03g53520	expressed protein
TraesCS5B02G468300	AT2G37040	PAL1	Phenylalanine ammonia-lyase 1	LOC_Os04g43800	phenylalanine ammonia-lyase
TraesCS5B02G468400	AT2G37040	PAL1	Phenylalanine ammonia-lyase 1	LOC_Os02g41630	phenylalanine ammonia-lyase
TraesCS5B02G473100	AT5G59870	HTA6	Probable histone H2A.7	LOC_Os01g31800	Core histone H2A/H2B/H3/H4 domain containing protein
TraesCS5B02G478300				LOC_Os01g04040	BBTI11 - Bowman-Birk type bran trypsin inhibitor precursor
TraesCS5B02G500700	AT3G11340		UDP-Glycosyltransferase superfamily protein	LOC_Os03g60960	cytokinin-N-glucosyltransferase 1
TraesCS5D02G038400	AT5G57550	XTH25	Probable xyloglucan endotransglucosylase/hydrolase protein 25	LOC_Os08g13920	glycosyl hydrolases family 16
TraesCS5D02G063200	AT5G59910	HTB4	Histone H2B.11	LOC_Os01g05900	Core histone H2A/H2B/H3/H4 domain containing protein
TraesCS5D02G067800	AT3G26330	CYP71B37	Cytochrome P450 71B37	LOC_Os03g39650	cytochrome P450
TraesCS5D02G103800	AT3G03080		Zinc-binding dehydrogenase family protein	LOC_Os12g12590	NADP-dependent oxidoreductase
TraesCS5D02G105900	AT5G07390	RBOHA	Respiratory burst oxidase homolog protein A	LOC_Os11g33120	respiratory burst oxidase
TraesCS5D02G110600	AT1G08880	HTA5	Probable histone H2AXa	LOC_Os12g34510	Core histone H2A/H2B/H3/H4 domain containing protein
TraesCS5D02G148700	AT2G42380	BZIP34	Basic leucine zipper 34	LOC_Os02g14910	bZIP transcription factor family protein
TraesCS5D02G171100	AT3G42660		transducin family protein / WD-40 repeat family protein	LOC_Os09g06560	WD domain
TraesCS5D02G182800	AT3G54780		Zinc finger (C3HC4-type RING finger) family protein	LOC_Os09g12720	zinc finger
TraesCS5D02G218100	AT4G37980	CAD7	Cinnamyl alcohol dehydrogenase 7	LOC_Os09g23560	dehydrogenase
TraesCS5D02G229700	AT1G79720		Eukaryotic aspartyl protease family protein	LOC_Os09g25570	aspartic proteinase
TraesCS5D02G248700	AT1G47480	CXE2	Probable carboxylesterase 2	LOC_Os09g28690	gibberellin receptor GID1L2
TraesCS5D02G252700	AT5G02560	HTA12	Probable histone H2A.4	LOC_Os05g02300	Core histone H2A/H2B/H3/H4 domain containing protein
TraesCS5D02G264000	AT5G59810	SBT5.4	Subtilisin-like protease SBT5.4	LOC_Os09g30250	OsSub58 - Putative Subtilisin homologue
TraesCS5D02G280600	AT4G33260	CDC20-2	Cell division cycle 20.2%2C cofactor of APC complex	LOC_Os02g47180	WD repeat-containing protein
TraesCS5D02G293200	AT5G52540		Protein of unknown function (DUF819)	LOC_Os06g01790	expressed protein
TraesCS5D02G373100	AT2G28370		CASP-like protein 5A2	LOC_Os10g20250	membrane associated DUF588 domain containing protein
TraesCS5D02G387500	AT4G14750	IQD19	IQ-domain 19	LOC_Os03g43580	IQ calmodulin-binding motif family protein
TraesCS5D02G388700	AT3G22400	LOX5	Linoleate 9S-lipoxygenase 5%2C chloroplastic	LOC_Os03g52860	lipoxygenase
TraesCS5D02G392000	AT3G04730	IAA16	Auxin-responsive protein IAA16	LOC_Os03g53150	OsIAA13 - Auxin-responsive Aux/IAA gene family member
TraesCS5D02G398500	AT3G47010		Glycosyl hydrolase family protein	LOC_Os01g56510	periplasmic beta-glucosidase precursor
TraesCS5D02G413600	AT2G15970	COR413PM1	Cold-regulated 413 plasma membrane protein 1	LOC_Os03g55850	cold acclimation protein WCOR413
TraesCS5D02G430300	AT3G54950	PLP7	Patatin-like protein 7	LOC_Os03g57080	PLA IIIA/PLP7
TraesCS5D02G474800	AT5G27670	HTA7	Probable histone H2A.5	LOC_Os01g31800	Core histone H2A/H2B/H3/H4 domain containing protein
TraesCS5D02G491900	AT5G59880	ADF3	Actin-depolymerizing factor 3	LOC_Os03g60580	actin-depolymerizing factor
TraesCS5D02G521700	AT5G42830		HXXXD-type acyl-transferase family protein	LOC_Os08g01980	transferase family protein
TraesCS5D02G565300	AT3G05020	ACP1	Acyl carrier protein 1%2C chloroplastic	LOC_Os03g63930	acyl carrier protein
TraesCS6A02G041700	AT4G35090	CAT2	Catalase-2	LOC_Os02g02400	catalase isozyme A
TraesCS6A02G055200	AT1G07660		Histone H4	LOC_Os05g39050	Core histone H2A/H2B/H3/H4 domain containing protein
TraesCS6A02G086200	AT3G45980	H2B	Histone H2B.6	LOC_Os01g05630	Core histone H2A/H2B/H3/H4 domain containing protein
TraesCS6A02G093300	AT5G40450		unknown protein%3B FUNCTIONS IN: molecular_function unknown%3B INVOLVED IN: biological_process unknown%3B LOCATED IN: chloroplast%2C plasma membrane%3B EXPRESSED IN: 24 plant structures%3B EXPRESSED DURING: 13 growth stages%3B Has 30201 Blast hits to 17322 protei /.../780 species: Archae - 12%3B Bacteria - 1396%3B Metazoa - 17338%3B Fungi - 3422%3B Plants - 5037%3B Viruses - 0%3B Other Eukaryotes…	LOC_Os02g03840	expressed protein
TraesCS6A02G108000	AT1G12040	LRX1	Leucine-rich repeat extensin-like protein 1	LOC_Os02g04540	retrotransposon protein
TraesCS6A02G113000	AT5G20730	ARF7	Auxin response factor 7	LOC_Os02g04810	auxin response factor 5
TraesCS6A02G117200	AT5G02560	HTA12	Probable histone H2A.4	LOC_Os01g31800	Core histone H2A/H2B/H3/H4 domain containing protein
TraesCS6A02G150200				LOC_Os06g44320	expressed protein
TraesCS6A02G155800	AT1G09200	HTR2	Histone H3.2	LOC_Os01g64640	histone H3
TraesCS6A02G173800	AT5G67300	MYB44	Transcription factor MYB44	LOC_Os02g09480	myb-like DNA-binding domain containing protein
TraesCS6A02G177500	AT4G32460		Protein of unknown function%2C DUF642	LOC_Os02g11040	expressed protein
TraesCS6A02G217100	AT1G65680	EXPB2	Putative expansin-B2	LOC_Os03g01270	expansin precursor
TraesCS6A02G248400	AT4G12430	TPPF	Probable trehalose-phosphate phosphatase F	LOC_Os02g44230	CPuORF22 - conserved peptide uORF-containing transcript
TraesCS6A02G282800	AT5G55230	MAP65-1	65-kDa microtubule-associated protein 1	LOC_Os02g48830	microtubule associated protein
TraesCS6A02G297500	AT2G32300	UCC1	uclacyanin 1	LOC_Os09g29390	plastocyanin-like domain containing protein
TraesCS6A02G298400	AT5G13930	CHS	Chalcone synthase	LOC_Os07g17010	chalcone synthase
TraesCS6A02G305600	AT5G66390	PER72	Peroxidase 72	LOC_Os01g36240	peroxidase precursor
TraesCS6A02G311000	AT1G71250		GDSL esterase/lipase At1g71250	LOC_Os02g50690	GDSL-like lipase/acylhydrolase
TraesCS6A02G316800	AT4G08950	EXO	Protein EXORDIUM	LOC_Os02g52000	phosphate-induced protein 1 conserved region domain containing protein
TraesCS6A02G326200	AT1G77760	NIA1	Nitrate reductase	LOC_Os02g53130	nitrate reductase
TraesCS6A02G337400				LOC_Os12g27440	expressed protein
TraesCS6A02G367300	AT5G34940	AtGUS3	Heparanase-like protein 3	LOC_Os02g55870	heparanase-like protein precursor
TraesCS6A02G371000				LOC_Os10g08780	expressed protein
TraesCS6A02G408300	AT5G57530	XTH12	Probable xyloglucan endotransglucosylase/hydrolase protein 12	LOC_Os08g13920	glycosyl hydrolases family 16
TraesCS6B02G079200	AT1G07660		Histone H4	LOC_Os05g39050	Core histone H2A/H2B/H3/H4 domain containing protein
TraesCS6B02G081800	AT1G09200	HTR2	Histone H3.2	LOC_Os01g64640	histone H3
TraesCS6B02G082600	AT5G22880	H2B	Histone H2B.10	LOC_Os05g49860	Core histone H2A/H2B/H3/H4 domain containing protein
TraesCS6B02G084300	AT1G07660		Histone H4	LOC_Os05g39050	Core histone H2A/H2B/H3/H4 domain containing protein
TraesCS6B02G115800	AT5G22880	H2B	Histone H2B.10	LOC_Os08g38300	Core histone H2A/H2B/H3/H4 domain containing protein
TraesCS6B02G122200	AT5G40450		unknown protein%3B FUNCTIONS IN: molecular_function unknown%3B INVOLVED IN: biological_process unknown%3B LOCATED IN: chloroplast%2C plasma membrane%3B EXPRESSED IN: 24 plant structures%3B EXPRESSED DURING: 13 growth stages%3B Has 30201 Blast hits to 17322 protei /.../780 species: Archae - 12%3B Bacteria - 1396%3B Metazoa - 17338%3B Fungi - 3422%3B Plants - 5037%3B Viruses - 0%3B Other Eukaryotes…	LOC_Os02g03840	expressed protein
TraesCS6B02G136600	AT1G12040	LRX1	Leucine-rich repeat extensin-like protein 1	LOC_Os02g04540	retrotransposon protein
TraesCS6B02G138700	AT5G08000	PDCB2	PLASMODESMATA CALLOSE-BINDING PROTEIN 2	LOC_Os03g30830	X8 domain containing protein
TraesCS6B02G144900	AT5G59870	HTA6	Probable histone H2A.7	LOC_Os05g02300	Core histone H2A/H2B/H3/H4 domain containing protein
TraesCS6B02G145200	AT5G59870	HTA6	Probable histone H2A.7	LOC_Os05g02300	Core histone H2A/H2B/H3/H4 domain containing protein
TraesCS6B02G166200	AT5G05340	PER52	Peroxidase 52	LOC_Os02g14160	peroxidase precursor
TraesCS6B02G171200	AT5G14860		UDP-Glycosyltransferase superfamily protein	LOC_Os06g39070	UDP-glucoronosyl and UDP-glucosyl transferase
TraesCS6B02G201600	AT3G19450	CAD4	Cinnamyl alcohol dehydrogenase 4	LOC_Os02g09490	dehydrogenase
TraesCS6B02G207200	AT4G32460		Protein of unknown function%2C DUF642	LOC_Os02g11040	expressed protein
TraesCS6B02G259000	AT3G53420	PIP2-1	Aquaporin PIP2-1	LOC_Os04g44060	aquaporin protein
TraesCS6B02G280400	AT1G02640	BXL2	Probable beta-D-xylosidase 2	LOC_Os01g19220	beta-D-xylosidase
TraesCS6B02G287900	AT2G44300		Bifunctional inhibitor/lipid-transfer protein/seed storage 2S albumin superfamily protein	LOC_Os07g09970	LTPL84 - Protease inhibitor/seed storage/LTP family protein precursor
TraesCS6B02G308500	AT4G35320		unknown protein%3B BEST Arabidopsis thaliana protein match is: unknown protein (TAIR:AT2G17300.1)%3B Has 30201 Blast hits to 17322 proteins in 780 species: Archae - 12%3B Bacteria - 1396%3B Metazoa - 17338%3B Fungi - 3422%3B Plants - 5037%3B Viruses - 0%3B Other Eu /.../es - 2996 (source: NCBI BLink).	LOC_Os02g48470	expressed protein
TraesCS6B02G336500	AT2G03090	EXPA15	Expansin-A15	LOC_Os02g51040	expansin precursor
TraesCS6B02G347100	AT1G35140	EXL1	Protein EXORDIUM-like 1	LOC_Os02g52040	phosphate-induced protein 1 conserved region domain containing protein
TraesCS6B02G361400	AT1G21910	ERF012	Ethylene-responsive transcription factor ERF012	LOC_Os06g10780	AP2 domain containing protein
TraesCS6B02G393500	AT2G07690	MCM5	DNA replication licensing factor MCM5	LOC_Os02g55410	MCM5 - Putative minichromosome maintenance MCM complex subunit 5
TraesCS6B02G422000	AT1G09560	GLP4	Germin-like protein subfamily 2 member 1	LOC_Os01g18170	Cupin domain containing protein
TraesCS6B02G454200	AT5G57530	XTH12	Probable xyloglucan endotransglucosylase/hydrolase protein 12	LOC_Os08g13920	glycosyl hydrolases family 16
TraesCS6D02G040600	AT5G22880	H2B	Histone H2B.10	LOC_Os05g49860	Core histone H2A/H2B/H3/H4 domain containing protein
TraesCS6D02G040700	AT5G27670	HTA7	Probable histone H2A.5	LOC_Os01g31800	Core histone H2A/H2B/H3/H4 domain containing protein
TraesCS6D02G040800	AT5G59870	HTA6	Probable histone H2A.7	LOC_Os05g02300	Core histone H2A/H2B/H3/H4 domain containing protein
TraesCS6D02G046200	AT3G46030	HTB11	Histone H2B.7	LOC_Os01g05630	Core histone H2A/H2B/H3/H4 domain containing protein
TraesCS6D02G078300	AT4G17260		Lactate/malate dehydrogenase family protein	LOC_Os02g01510	lactate/malate dehydrogenase
TraesCS6D02G089000	AT5G40450		unknown protein%3B FUNCTIONS IN: molecular_function unknown%3B INVOLVED IN: biological_process unknown%3B LOCATED IN: chloroplast%2C plasma membrane%3B EXPRESSED IN: 24 plant structures%3B EXPRESSED DURING: 13 growth stages%3B Has 30201 Blast hits to 17322 protei /.../780 species: Archae - 12%3B Bacteria - 1396%3B Metazoa - 17338%3B Fungi - 3422%3B Plants - 5037%3B Viruses - 0%3B Other Eukaryotes…	LOC_Os02g03840	expressed protein
TraesCS6D02G096000	AT1G12040	LRX1	Leucine-rich repeat extensin-like protein 1	LOC_Os02g04540	retrotransposon protein
TraesCS6D02G106800	AT5G59870	HTA6	Probable histone H2A.7	LOC_Os05g02300	Core histone H2A/H2B/H3/H4 domain containing protein
TraesCS6D02G127100	AT5G05340	PER52	Peroxidase 52	LOC_Os02g14160	peroxidase precursor
TraesCS6D02G145800	AT1G09200	HTR2	Histone H3.2	LOC_Os01g64640	histone H3
TraesCS6D02G193100	AT5G50200	NRT3.1	High-affinity nitrate transporter 3.1	LOC_Os04g40410	high affinity nitrate transporter
TraesCS6D02G222400	AT1G33260		Probable receptor-like protein kinase At1g33260	LOC_Os02g43290	protein kinase domain containing protein
TraesCS6D02G248800	AT5G53520	OPT8	Oligopeptide transporter 8	LOC_Os03g54000	oligopeptide transporter
TraesCS6D02G280900	AT4G39730		Lipase/lipooxygenase%2C PLAT/LH2 family protein	LOC_Os02g51710	wound/stress protein
TraesCS6D02G296200	AT4G08950	EXO	Protein EXORDIUM	LOC_Os02g52010	phosphate-induced protein 1 conserved region domain containing protein
TraesCS6D02G297800				LOC_Os10g05130	expressed protein
TraesCS6D02G300900	AT3G19210	CHR25	Protein CHROMATIN REMODELING 25	LOC_Os02g52510	SNF2 family N-terminal domain containing protein
TraesCS6D02G349500	AT5G11090		serine-rich protein-related	LOC_Os02g55610	serine-rich protein
TraesCS6D02G367700	AT1G09560	GLP4	Germin-like protein subfamily 2 member 1	LOC_Os01g18170	Cupin domain containing protein
TraesCS6D02G367800	AT1G09560	GLP4	Germin-like protein subfamily 2 member 1	LOC_Os01g18170	Cupin domain containing protein
TraesCS6D02G370100				LOC_Os02g56940	expressed protein
TraesCS6D02G392100	AT5G57530	XTH12	Probable xyloglucan endotransglucosylase/hydrolase protein 12	LOC_Os08g13920	glycosyl hydrolases family 16
TraesCS7A02G009200	AT1G62660	BFRUCT3	Acid beta-fructofuranosidase 3%2C vacuolar	LOC_Os02g01590	glycosyl hydrolases
TraesCS7A02G009800	AT1G12240	BFRUCT4	Acid beta-fructofuranosidase 4%2C vacuolar	LOC_Os02g01590	glycosyl hydrolases
TraesCS7A02G055400	AT5G52060	BAG1	BAG family molecular chaperone regulator 1	LOC_Os06g03640	BAG domain containing protein
TraesCS7A02G056100	AT1G22360	UGT85A2	UDP-glycosyltransferase 85A2	LOC_Os04g25380	cytokinin-O-glucosyltransferase 2
TraesCS7A02G069300	AT4G34710	SPE2	Arginine decarboxylase 2	LOC_Os06g04070	pyridoxal-dependent decarboxylase protein
TraesCS7A02G091900	AT5G25940		early nodulin-related	LOC_Os06g04950	early nodulin 93 ENOD93 protein
TraesCS7A02G092000	AT5G25940		early nodulin-related	LOC_Os06g05000	early nodulin 93 ENOD93 protein
TraesCS7A02G092700	AT5G25940		early nodulin-related	LOC_Os06g04950	early nodulin 93 ENOD93 protein
TraesCS7A02G093300	AT5G25940		early nodulin-related	LOC_Os06g04950	early nodulin 93 ENOD93 protein
TraesCS7A02G134600	AT3G11590		unknown protein%3B LOCATED IN: plasma membrane%3B EXPRESSED IN: 22 plant structures%3B EXPRESSED DURING: 13 growth stages%3B BEST Arabidopsis thaliana protein match is: unknown protein (TAIR:AT5G22310.1)%3B Has 22320 Blast hits to 15179 proteins in 1213 speci /.../chae - 372%3B Bacteria - 2307%3B Metazoa - 10906%3B Fungi - 1700%3B Plants - 1146%3B Viruses - 65%3B Other Eukaryotes - 5824 (source: …	LOC_Os02g30280	expressed protein
TraesCS7A02G168500	AT1G21880	LYM1	LysM domain-containing GPI-anchored protein 1	LOC_Os06g10660	lysM domain-containing GPI-anchored protein 1 precursor
TraesCS7A02G169100	AT1G44800		WAT1-related protein At1g44800	LOC_Os06g10750	integral membrane protein DUF6 containing protein
TraesCS7A02G178500	AT4G08950	EXO	Protein EXORDIUM	LOC_Os06g11660	phosphate-induced protein 1 conserved region domain containing protein
TraesCS7A02G183100	AT1G53210		sodium/calcium exchanger family protein / calcium-binding EF hand family protein	LOC_Os02g14980	calcium-binding EF hand family protein
TraesCS7A02G197800	AT3G02100	UGT83A1	UDP-glycosyltransferase 83A1	LOC_Os03g55030	UDP-glucoronosyl and UDP-glucosyl transferase domain containing protein
TraesCS7A02G207700	AT1G74790	HIPL1	HIPL1 protein	LOC_Os07g09520	expressed protein
TraesCS7A02G240400	AT4G34050	CCOAOMT1	Caffeoyl-CoA O-methyltransferase 1	LOC_Os08g38910	caffeoyl-CoA O-methyltransferase
TraesCS7A02G245400	AT3G57830		Leucine-rich repeat protein kinase family protein	LOC_Os08g39590	inactive receptor kinase At2g26730 precursor
TraesCS7A02G255700	AT3G07390	AIR12	auxin-responsive family protein	LOC_Os08g41290	AIR12
TraesCS7A02G266300	AT1G08760		Plant protein of unknown function (DUF936)	LOC_Os08g42870	expressed protein
TraesCS7A02G331300	AT3G16240	TIP2-1	Aquaporin TIP2-1	LOC_Os06g22960	aquaporin protein
TraesCS7A02G342000	AT5G52860	ABCG8	ABC transporter G family member 8	LOC_Os06g30730	ABC-2 type transporter domain containing protein
TraesCS7A02G343600	AT2G46330	AGP16	Arabinogalactan peptide 16	LOC_Os02g16500	expressed protein
TraesCS7A02G353400	AT5G05340	PER52	Peroxidase 52	LOC_Os06g35520	peroxidase precursor
TraesCS7A02G357200	AT5G56550	OXS3	oxidative stress 3	LOC_Os06g36390	expressed protein
TraesCS7A02G363500	AT2G19580	TET2	Tetraspanin-2	LOC_Os06g37510	tetraspanin family protein
TraesCS7A02G427600	AT5G57560	XTH22	Xyloglucan endotransglucosylase/hydrolase protein 22	LOC_Os06g48160	glycosyl hydrolases family 16
TraesCS7A02G437900	AT5G02560	HTA12	Probable histone H2A.4	LOC_Os05g02300	Core histone H2A/H2B/H3/H4 domain containing protein
TraesCS7A02G438000	AT5G02560	HTA12	Probable histone H2A.4	LOC_Os05g02300	Core histone H2A/H2B/H3/H4 domain containing protein
TraesCS7A02G438400	AT5G02560	HTA12	Probable histone H2A.4	LOC_Os05g02300	Core histone H2A/H2B/H3/H4 domain containing protein
TraesCS7A02G442500	AT5G27380	GSH2	Glutathione synthetase%2C chloroplastic	LOC_Os12g16200	glutathione synthetase
TraesCS7A02G455400	AT3G63430		unknown protein%3B BEST Arabidopsis thaliana protein match is: unknown protein (TAIR:AT1G74160.1)%3B Has 135 Blast hits to 119 proteins in 22 species: Archae - 0%3B Bacteria - 2%3B Metazoa - 3%3B Fungi - 3%3B Plants - 119%3B Viruses - 0%3B Other Eukaryotes - 8 (sou /.../CBI BLink).	LOC_Os11g37670	expressed protein
TraesCS7A02G459400	AT2G23630	sks16	SKU5 similar 16	LOC_Os06g46500	monocopper oxidase
TraesCS7A02G463800	AT4G30270	XTH24	Xyloglucan endotransglucosylase/hydrolase protein 24	LOC_Os08g14200	glycosyl hydrolases family 16
TraesCS7A02G479700	AT2G03530	UPS2	Ureide permease 2	LOC_Os12g31860	ureide permease
TraesCS7A02G491000	AT5G22880	H2B	Histone H2B.10	LOC_Os01g05610	Core histone H2A/H2B/H3/H4 domain containing protein
TraesCS7A02G491100	AT5G22880	H2B	Histone H2B.10	LOC_Os01g05610	Core histone H2A/H2B/H3/H4 domain containing protein
TraesCS7A02G516300	AT1G13245	RTFL17	ROTUNDIFOLIA like 17
TraesCS7B02G024500	AT1G58290	HEMA1	Glutamyl-tRNA reductase 1%2C chloroplastic	LOC_Os10g35840	shikimate/quinate 5-dehydrogenase
TraesCS7B02G074500	AT1G77640	ERF013	Ethylene-responsive transcription factor ERF013	LOC_Os06g10780	AP2 domain containing protein
TraesCS7B02G104600	AT2G32990	AtGH9B8	Endoglucanase 11	LOC_Os02g50490	endoglucanase
TraesCS7B02G122600	AT4G18910	NIP1-2	Aquaporin NIP1-2	LOC_Os02g13870	aquaporin protein
TraesCS7B02G127200	AT3G18440	ALMT9	Aluminum-activated malate transporter 9	LOC_Os02g49790	aluminum-activated malate transporter
TraesCS7B02G152200	AT3G07390	AIR12	auxin-responsive family protein	LOC_Os08g41290	AIR12
TraesCS7B02G153200	AT2G22795		unknown protein%3B BEST Arabidopsis thaliana protein match is: unknown protein (TAIR:AT4G37820.1)%3B Has 799854 Blast hits to 188815 proteins in 4452 species: Archae - 4529%3B Bacteria - 144236%3B Metazoa - 287749%3B Fungi - 87083%3B Plants - 43826%3B Viruses - 3 /.../ther Eukaryotes - 228769 (source: NCBI BLink).	LOC_Os08g41400	expressed protein
TraesCS7B02G188400	AT3G03050	CSLD3	Cellulose synthase-like protein D3	LOC_Os08g06380	CSLF6 - cellulose synthase-like family F; beta1
TraesCS7B02G215700	AT1G12420	ACR8	ACT domain-containing protein ACR8	LOC_Os03g14370	ACT domain containing protein
TraesCS7B02G235100	AT5G45910		GDSL esterase/lipase At5g45910	LOC_Os06g34120	GDSL-like lipase/acylhydrolase
TraesCS7B02G240900	AT5G52860	ABCG8	ABC transporter G family member 8	LOC_Os06g30730	ABC-2 type transporter domain containing protein
TraesCS7B02G265000	AT2G36870	XTH32	Probable xyloglucan endotransglucosylase/hydrolase protein 32	LOC_Os07g29750	glycosyl hydrolases family 16
TraesCS7B02G294800	AT5G38530	TSBtype2	tryptophan synthase beta type 2	LOC_Os06g42560	tryptophan synthase beta chain 2
TraesCS7B02G299500	AT2G30490	CYP73A5	Trans-cinnamate 4-monooxygenase	LOC_Os02g26810	cytochrome P450
TraesCS7B02G303800	AT5G12950		Putative glycosyl hydrolase of unknown function (DUF1680)	LOC_Os06g41020	DUF1680 domain containing protein
TraesCS7B02G325800	AT5G06730	PER54	Peroxidase 54	LOC_Os10g02040	peroxidase precursor
TraesCS7B02G327700	AT4G25810	XTH23	Probable xyloglucan endotransglucosylase/hydrolase protein 23	LOC_Os06g48160	glycosyl hydrolases family 16
TraesCS7B02G336700	AT5G02560	HTA12	Probable histone H2A.4	LOC_Os05g02300	Core histone H2A/H2B/H3/H4 domain containing protein
TraesCS7B02G336900	AT5G02560	HTA12	Probable histone H2A.4	LOC_Os05g02300	Core histone H2A/H2B/H3/H4 domain containing protein
TraesCS7B02G359700	AT2G23630	sks16	SKU5 similar 16	LOC_Os06g46500	monocopper oxidase
TraesCS7B02G371700	AT5G13930	CHS	Chalcone synthase	LOC_Os07g34140	chalcone synthase
TraesCS7B02G384700	AT4G12470	AZI1	pEARLI1-like lipid transfer protein 1	LOC_Os03g01300	LTPL114 - Protease inhibitor/seed storage/LTP family protein precursor
TraesCS7B02G398100	AT5G57090	PIN2	Auxin efflux carrier component 2	LOC_Os06g12610	auxin efflux carrier component
TraesCS7B02G408400	AT1G54690	HTA3	Probable histone H2AXb	LOC_Os12g34510	Core histone H2A/H2B/H3/H4 domain containing protein
TraesCS7D02G008700	AT1G62660	BFRUCT3	Acid beta-fructofuranosidase 3%2C vacuolar	LOC_Os02g01590	glycosyl hydrolases
TraesCS7D02G009400	AT1G12240	BFRUCT4	Acid beta-fructofuranosidase 4%2C vacuolar	LOC_Os02g01590	glycosyl hydrolases
TraesCS7D02G031000	AT3G07040	RPM1	Disease resistance protein RPM1	LOC_Os06g03500	NBS-LRR disease resistance protein
TraesCS7D02G051000	AT1G22360	UGT85A2	UDP-glycosyltransferase 85A2	LOC_Os04g25970	cytokinin-O-glucosyltransferase 2
TraesCS7D02G087500	AT5G25940		early nodulin-related	LOC_Os06g04990	early nodulin 93 ENOD93 protein
TraesCS7D02G087800	AT5G25940		early nodulin-related	LOC_Os06g05000	early nodulin 93 ENOD93 protein
TraesCS7D02G088000	AT5G25940		early nodulin-related	LOC_Os06g04950	early nodulin 93 ENOD93 protein
TraesCS7D02G088500	AT5G25940		early nodulin-related	LOC_Os06g04950	early nodulin 93 ENOD93 protein
TraesCS7D02G097400	AT5G57550	XTH25	Probable xyloglucan endotransglucosylase/hydrolase protein 25	LOC_Os08g13920	glycosyl hydrolases family 16
TraesCS7D02G116800	AT1G09200	HTR2	Histone H3.2	LOC_Os01g64640	histone H3
TraesCS7D02G145600	AT1G07240	UGT71C5	UDP-glycosyltransferase 71C5	LOC_Os07g32620	anthocyanidin 5
TraesCS7D02G164500				LOC_Os03g18850	pathogenesis-related Bet v I family protein
TraesCS7D02G169400	AT1G21880	LYM1	LysM domain-containing GPI-anchored protein 1	LOC_Os06g10660	lysM domain-containing GPI-anchored protein 1 precursor
TraesCS7D02G192400	AT3G48040	ARAC8	Rac-like GTP-binding protein ARAC8	LOC_Os06g12790	ras-related protein
TraesCS7D02G221900	AT3G18440	ALMT9	Aluminum-activated malate transporter 9	LOC_Os02g49790	aluminum-activated malate transporter
TraesCS7D02G246600	AT3G54560	H2AV	Histone H2A variant 1	LOC_Os10g28230	Core histone H2A/H2B/H3/H4 domain containing protein
TraesCS7D02G294300	AT3G03050	CSLD3	Cellulose synthase-like protein D3	LOC_Os07g36630	CSLF8 - cellulose synthase-like family F; beta1
TraesCS7D02G315000	AT3G62160		HXXXD-type acyl-transferase family protein	LOC_Os01g42870	transferase family protein
TraesCS7D02G317300	AT1G33700		Beta-glucosidase%2C GBA2 type family protein	LOC_Os08g01940	non-lysosomal glucosylceramidase
TraesCS7D02G336000	AT2G46330	AGP16	Arabinogalactan peptide 16	LOC_Os02g16500	expressed protein
TraesCS7D02G339600	AT3G16240	TIP2-1	Aquaporin TIP2-1	LOC_Os06g22960	aquaporin protein
TraesCS7D02G355000	AT5G62550		unknown protein%3B FUNCTIONS IN: molecular_function unknown%3B INVOLVED IN: biological_process unknown%3B LOCATED IN: plasma membrane%3B EXPRESSED IN: 17 plant structures%3B EXPRESSED DURING: 9 growth stages%3B Has 14949 Blast hits to 9947 proteins in 971 speci /.../chae - 43%3B Bacteria - 3248%3B Metazoa - 4424%3B Fungi - 1542%3B Plants - 562%3B Viruses - 55%3B Other Eukaryotes - 5075 (source: N…	LOC_Os06g38960	expressed protein
TraesCS7D02G360100	AT2G36870	XTH32	Probable xyloglucan endotransglucosylase/hydrolase protein 32	LOC_Os07g29750	glycosyl hydrolases family 16
TraesCS7D02G368800	AT5G44410		FAD-binding Berberine family protein	LOC_Os06g35630	reticuline oxidase-like protein precursor
TraesCS7D02G369400	AT5G05340	PER52	Peroxidase 52	LOC_Os06g35520	peroxidase precursor
TraesCS7D02G393100	AT2G30490	CYP73A5	Trans-cinnamate 4-monooxygenase	LOC_Os02g26810	cytochrome P450
TraesCS7D02G401000	AT5G17540		HXXXD-type acyl-transferase family protein	LOC_Os06g49660	transferase family protein
TraesCS7D02G417400	AT2G38380	PER22	Peroxidase 22	LOC_Os10g02040	peroxidase precursor
TraesCS7D02G419900	AT4G25810	XTH23	Probable xyloglucan endotransglucosylase/hydrolase protein 23	LOC_Os06g48160	glycosyl hydrolases family 16
TraesCS7D02G427900	AT5G02560	HTA12	Probable histone H2A.4	LOC_Os05g02300	Core histone H2A/H2B/H3/H4 domain containing protein
TraesCS7D02G442300	AT1G05260	PER3	Peroxidase 3	LOC_Os06g46799	peroxidase precursor
TraesCS7D02G452700			LOC_Os06g46250	expressed protein
TraesCS7D02G461200	AT4G33420	PER47	Peroxidase 47	LOC_Os01g19020	peroxidase precursor
TraesCS7D02G465400	AT1G10370	GSTU17	Glutathione S-transferase U17	LOC_Os10g38710	glutathione S-transferase
TraesCS7D02G477300	AT5G22880	H2B	Histone H2B.10	LOC_Os01g05610	Core histone H2A/H2B/H3/H4 domain containing protein
TraesCSU02G024200	AT1G06640		1-aminocyclopropane-1-carboxylate oxidase homolog 2	LOC_Os03g48430	1-aminocyclopropane-1-carboxylate oxidase homolog 4
TraesCSU02G036600	AT5G44640	BGLU13	Beta-glucosidase 13	LOC_Os04g39880	Os4bglu12 - beta-glucosidase
TraesCSU02G057800
TraesCSU02G093700	AT5G05810	ATL43	RING/U-box superfamily protein	LOC_Os06g48065	Zinc finger
TraesCSU02G104800	AT4G00820	iqd17	IQ-domain 17	LOC_Os08g02250	IQ calmodulin-binding motif domain containing protein
TraesCSU02G114300	AT2G36380	ABCG34	ABC transporter G family member 34	LOC_Os08g43120	Plant PDR ABC transporter associated domain containing protein
TraesCSU02G114400	AT2G34500	CYP710A1	Cytochrome P450 710A1	LOC_Os01g11340	cytochrome P450
TraesCSU02G114600	AT1G64640	ENODL8	early nodulin-like protein 8	LOC_Os03g02400	plastocyanin-like domain containing protein
TraesCSU02G121200	AT1G07660		Histone H4	LOC_Os05g39050	Core histone H2A/H2B/H3/H4 domain containing protein
