# Supplementary material for: Integrated transcriptome profiling identifies novel regulatory hubs mediating salt stress responses during germination and early seedling development in wheat
Source: Research Square preprint supplement (doi:10.21203/rs.3.rs-8546897/v1), 2026-01-22
Supplement: Supplementary file 2 [file 65b1a9747e2b41129494f838.xlsx]

## Sheet: all-salt-RNAseq-mapping-statist
Table S1 statistics of reads alignment for RNA-seq
Library	Raw reads	High-quanlity reads		mapped reads		uniquely mapped reads
	Number	Number	Percent	Number	Percent	Number	Percent
Water-10h-rep1	134782652	133991654	0.994131	125627468	0.932074	109974422	0.815939
Water-10h-rep2	141062884	139967002	0.992231	129992492	0.921522	113013209	0.801155
Water-10h-rep3	146767082	145874836	0.993921	136721687	0.931556	118094141	0.804636
Salt-10h-rep1	134075774	133326982	0.994415	124956325	0.931983	109774341	0.818749
Salt-10h-rep2	143139604	142270940	0.993931	133187378	0.930472	115723787	0.808468
Salt-10h-rep3	144526818	143496400	0.99287	134551001	0.930976	118457485	0.819623
Water-14h-rep1	134918482	133882880	0.992324	125525741	0.930382	109685834	0.812979
Water-14h-rep2	135809670	134867170	0.99306	124770669	0.918717	107169868	0.789118
Water-14h-rep3	136005014	135117656	0.993476	126811748	0.932405	111044308	0.816472
Salt-14h-rep1	135876120	135194636	0.994985	126596103	0.931702	104918521	0.772163
Salt-14h-rep2	148542364	147828458	0.995194	137832013	0.927897	114014645	0.767556
Salt-14h-rep3	138599742	137959712	0.995382	129508175	0.934404	108516156	0.782946
Water-18h-rep1	137577036	136397328	0.991425	126208950	0.917369	108625913	0.789564
Water-18h-rep2	146303908	145045378	0.991398	135007202	0.922786	118083737	0.807113
Water-18h-rep3	149127972	147840234	0.991365	136656994	0.916374	117682654	0.789139
Salt-18h-rep1	155167044	153890084	0.99177	142149432	0.916106	123087552	0.793258
Salt-18h-rep2	139310424	138474062	0.993996	129030219	0.926206	106989281	0.767992
Salt-18h-rep3	139087902	137869152	0.991238	127947196	0.919902	111115235	0.798885
Water-leaf-1	138927758	137888960	0.992523	131417087	0.945938	98245068	0.707167
Water-leaf-2	151885506	150491200	0.99082	142638999	0.939122	107661998	0.708837
Water-leaf-3	147974418	146931910	0.992955	140608822	0.950224	103873210	0.701967
Salt-leaf-1	163149986	161607276	0.990544	151229411	0.926935	118186685	0.724405
Salt-leaf-2	146714386	145614836	0.992506	135819790	0.925743	112980092	0.770068
Salt-leaf-3	145774698	144606446	0.991986	135542994	0.929812	110533538	0.758249
Water-root-1	123756888	122738202	0.991769	89093370	0.719906	74762224	0.604106
Water-root-2	145053940	143601546	0.989987	117626669	0.810917	93709648	0.646033
Water-root-3	151601916	150054250	0.989791	120415707	0.794289	103134640	0.680299
Salt-root-1	123962022	122625058	0.989215	53210599	0.429249	47516914	0.383318
Salt-root-2	125874690	124403934	0.988316	47138993	0.374491	42237236	0.33555
Salt-root-3	120872546	119614668	0.989593	46314615	0.383169	41337891	0.341996
