# Supplementary material for: Integrated transcriptome profiling identifies novel regulatory hubs mediating salt stress responses during germination and early seedling development in wheat
Source: Research Square preprint supplement (doi:10.21203/rs.3.rs-8546897/v1), 2026-01-22
Supplement: Supplementary file 3 [file 7694926936414040bd05c1bc.xlsx]

## Sheet: 10 HAI
	The information of salt-regulated DEGs at 10HAI.
Gene ID	Log2 (Fold Change)	P-value	FDR	Regulation	Annotation
					The homologous genes and corresponding descriptions in Arabidopsis thaliana			The homologous genes and corresponding descriptions in Oryza sativa
TraesCS7A02G476100	8.15514	2.433e-10	4.43301e-07	Up				LOC_Os02g18630	OsFBX44 - F-box domain containing protein
TraesCS5B02G563600	7.72556	1.70696e-06	0.000573502	Up	AT5G35450	RPP8L3	Disease resistance RPP8-like protein 3	LOC_Os08g14850	resistance protein
TraesCS7A02G008500	7.62052	5.14469e-12	2.1193e-08	Up	AT3G46730	RPP13L3	Putative disease resistance RPP13-like protein 3	LOC_Os11g37880	stripe rust resistance protein Yr10
TraesCS7D02G424100	7.51299	1.33435e-06	0.000468956	Up	AT1G57790		F-box/kelch-repeat protein At1g57790	LOC_Os11g37390	OsFBDUF54 - F-box and DUF domain containing protein
TraesCS2B02G558000	7.45674	3.92629e-06	0.00106286	Up				LOC_Os04g54380	aluminum resistance protein
TraesCS5D02G046600	7.44831	0.000169166	0.0137476	Up	AT1G52780		Protein of unknown function (DUF2921)	LOC_Os07g39250	expressed protein
TraesCS6D02G025900	7.41311	4.85401e-05	0.00606446	Up				LOC_Os04g12460	Leucine Rich Repeat family protein
TraesCS1A02G056200	7.38312	1.61778e-05	0.00285435	Up
TraesCS5D02G456500	7.37373	1.92042e-06	0.000627421	Up	ATCG00780	RPL14	50S ribosomal protein L14%2C chloroplastic	LOC_Os01g57956	chloroplast 50S ribosomal protein L14
TraesCS5D02G171700	7.35688	0.000152734	0.0129668	Up				LOC_Os08g03990	expressed protein
TraesCS1D02G423100	7.23523	1.00447e-06	0.000379161	Up	AT2G03220	FUT1	Galactoside 2-alpha-L-fucosyltransferase	LOC_Os02g17534	xyloglucan fucosyltransferase
TraesCS1D02G425500	7.22143	1.78517e-10	3.52371e-07	Up	AT4G34880		Amidase family protein	LOC_Os10g06710	amidase
TraesCS2A02G067900	7.21612	1.81449e-08	1.62184e-05	Up	AT3G47110		Putative receptor-like protein kinase At3g47110	LOC_Os04g15660	receptor kinase
TraesCS2A02G471400	7.21082	3.35269e-10	5.86964e-07	Up	AT5G58290	RPT3	26S protease regulatory subunit 6B homolog	LOC_Os02g21970	26S protease regulatory subunit 6B
TraesCS1B02G465200	7.14145	7.57295e-05	0.00807353	Up	AT4G34100	SUD1	Probable E3 ubiquitin ligase SUD1	LOC_Os08g01040	zinc finger
TraesCS5B02G327000	7.1396	2.97991e-05	0.00425844	Up	AT3G23880		F-box/kelch-repeat protein At3g23880	LOC_Os07g09814	OsFBX221 - F-box domain containing protein
TraesCS1A02G302700	7.1155	7.22667e-05	0.00784528	Up	AT5G58280		Putative B3 domain-containing protein At5g58280	LOC_Os05g40280	B3 DNA binding domain containing protein
TraesCS4B02G213100	7.07254	4.73356e-07	0.00021666	Up	AT3G09085		Protein of unknown function (DUF962)	LOC_Os03g15910	membrane protein
TraesCS7B02G172300	7.07127	4.57339e-05	0.0058319	Up	AT2G17080		Arabidopsis protein of unknown function (DUF241)	LOC_Os08g43870	carrier
TraesCS7D02G509200	7.03434	0.00042314	0.0247966	Up				LOC_Os01g43010	transposon protein
TraesCS4A02G100700	6.97448	0.00089909	0.0401628	Up	AT3G19500	BHLH113	Transcription factor bHLH113	LOC_Os03g17130	bHelix-loop-helix transcription factor
TraesCS6B02G066700	6.96627	4.86449e-05	0.00606446	Up	AT2G13540	ABH1	Nuclear cap-binding protein subunit 1	LOC_Os03g22570	MIF4G domain containing protein
TraesCS6B02G087000	6.96562	0.000770862	0.0364998	Up	AT2G17080		Arabidopsis protein of unknown function (DUF241)	LOC_Os08g43870	carrier
TraesCS5B02G276800	6.95663	2.39695e-09	3.06894e-06	Up				LOC_Os05g46090	Leucine Rich Repeat domain containing protein
TraesCS5D02G551200	6.95605	1.20532e-05	0.00234956	Up	AT2G36990	SIGF	RNA polymerase sigma factor sigF%2C chloroplastic	LOC_Os08g14450	RNA polymerase sigma factor
TraesCS4A02G197000	6.94339	4.49359e-06	0.0011761	Up	AT1G13790	FDM4	Factor of DNA methylation 4	LOC_Os01g44230	transcription factor X1
TraesCS3A02G414500	6.92557	4.64952e-07	0.000213846	Up				LOC_Os07g35190	expressed protein
TraesCS5B02G351100	6.92096	4.54511e-05	0.00581148	Up	AT3G45020		Ribosomal L18p/L5e family protein	LOC_Os09g37740	ribosomal L18p/L5e family protein
TraesCS7D02G065400	6.90089	5.96736e-06	0.00142414	Up	AT1G32860		Glucan endo-1%2C3-beta-glucosidase 11	LOC_Os06g04080	glycosyl hydrolases family 17
TraesCS7D02G049000	6.89243	4.26167e-05	0.00557377	Up	AT1G09930	OPT2	Oligopeptide transporter 2	LOC_Os03g54000	oligopeptide transporter
TraesCS5B02G037300	6.88202	0.00017863	0.0142966	Up				LOC_Os01g01950	expressed protein
TraesCS6B02G467900	6.87616	0.000570515	0.0299827	Up	AT3G07040	RPM1	Disease resistance protein RPM1	LOC_Os12g37740	resistance protein LR10
TraesCS7A02G460900	6.86458	3.75454e-05	0.00507768	Up	AT5G02800	CDL1	Serine/threonine-protein kinase CDL1	LOC_Os07g49470	protein kinase APK1B
TraesCS1D02G051500	6.84696	5.30149e-07	0.000235723	Up	AT3G46730	RPP13L3	Putative disease resistance RPP13-like protein 3	LOC_Os11g46200	Leucine Rich Repeat family protein
TraesCS1A02G186400	6.84183	1.1443e-06	0.000420225	Up	AT1G10370	GSTU17	Glutathione S-transferase U17	LOC_Os10g38710	glutathione S-transferase
TraesCS5D02G524600	6.82947	6.17884e-09	6.57776e-06	Up	AT4G00240	PLDBETA2	Phospholipase D beta 2	LOC_Os10g38060	phospholipase D
TraesCS5B02G295700	6.81791	6.24649e-05	0.00719113	Up	AT3G14460		Putative disease resistance protein At3g14460	LOC_Os11g44580	go35 NBS-LRR
TraesCS1B02G044200	6.79545	2.54108e-07	0.000137575	Up	AT3G14470	RPPL1	Putative disease resistance RPP13-like protein 1	LOC_Os04g30660	NBS type disease resistance protein
TraesCS7D02G270600	6.79263	5.25225e-06	0.00130611	Up	AT4G11660	HSFB2B	Heat stress transcription factor B-2b	LOC_Os08g43334	HSF-type DNA-binding domain containing protein
TraesCS5B02G462600	6.7767	5.52388e-05	0.0065876	Up	AT2G44310		Calcium-binding EF-hand family protein	LOC_Os03g29770	EF hand family protein
TraesCS6B02G444100	6.77086	5.14416e-09	5.73399e-06	Up	AT1G02260		Divalent ion symporter	LOC_Os02g57620	Citrate transporter protein
TraesCS5D02G424600	6.76248	0.000507686	0.0279984	Up				LOC_Os03g56860	expressed protein
TraesCS2A02G457500	6.75657	3.17787e-06	0.000899062	Up	AT2G27170	SMC3	Structural maintenance of chromosomes protein 3	LOC_Os02g04080	chromosome segregation protein sudA
TraesCS3B02G138700	6.74016	7.31239e-05	0.0079089	Up	AT2G21790	RNR1	Ribonucleoside-diphosphate reductase large subunit	LOC_Os06g07210	ribonucleoside-diphosphate reductase large subunit
TraesCS7A02G561900	6.71671	0.000581219	0.0303406	Up	AT1G50180		Putative disease resistance protein At1g50180	LOC_Os11g41540	disease resistance RPP8-like protein 3
TraesCS1D02G235500	6.70985	0.000567003	0.0298567	Up	AT3G26700		Protein kinase superfamily protein	LOC_Os05g30820	protein kinase
TraesCS6B02G367700	6.70962	0.000508816	0.0280281	Up	AT5G45540		Protein of unknown function (DUF594)	LOC_Os07g08270	expressed protein
TraesCS7A02G089800	6.70753	7.36048e-08	5.24343e-05	Up	AT2G45790	PMM	Phosphomannomutase	LOC_Os04g58580	phosphomannomutase
TraesCS2A02G121400	6.69547	2.17394e-05	0.00346755	Up	AT1G78760		Putative F-box/FBD/LRR-repeat protein At1g78760	LOC_Os08g09760	OsFBX275 - F-box domain containing protein
TraesCS7D02G391500	6.69506	1.66701e-06	0.000562073	Up	AT2G33590		NAD(P)-binding Rossmann-fold superfamily protein	LOC_Os06g41810	reductase
TraesCS7D02G005500	6.67843	4.64535e-05	0.00589195	Up	AT3G46530	RPP13	Disease resistance protein RPP13	LOC_Os11g27430	NB-ARC domain containing protein
TraesCS3B02G472700	6.66889	8.97537e-05	0.00905623	Up				LOC_Os07g18570	expressed protein
TraesCS1A02G276200	6.63782	6.27599e-09	6.60694e-06	Up	AT2G27500		Glucan endo-1%2C3-beta-glucosidase 14	LOC_Os01g64170	glycosyl hydrolases family 17
TraesCS1A02G271700	6.61812	4.79459e-09	5.40796e-06	Up	AT5G17210		Protein of unknown function (DUF1218)	LOC_Os05g35960	expressed protein
TraesCS5B02G318300	6.59781	0.000514162	0.0281426	Up	AT5G54830		Cytochrome b561%2C DM13 and DOMON domain-containing protein At5g54830	LOC_Os06g44040	DOMON domain containing protein
TraesCS6B02G035800	6.59434	0.000211399	0.0160766	Up	AT3G07040	RPM1	Disease resistance protein RPM1	LOC_Os08g42670	resistance protein
TraesCS5D02G059700	6.57492	1.80554e-08	1.62184e-05	Up	AT1G56010	NAC021	NAC domain-containing protein 21/22	LOC_Os12g41680	No apical meristem protein
TraesCS6D02G210200	6.57139	0.000821448	0.0378465	Up	AT1G21270	WAK2	Wall-associated receptor kinase 2	LOC_Os02g41500	OsWAK13 - OsWAK receptor-like protein kinase
TraesCS6B02G307700	6.5676	5.29306e-05	0.0064212	Up	AT3G11460	PCMP-H52	Putative pentatricopeptide repeat-containing protein At3g11460	LOC_Os11g14980	pentatricopeptide
TraesCS1D02G023500	6.54729	8.67967e-06	0.00186901	Up				LOC_Os04g54759	expressed protein
TraesCS3B02G072400	6.54003	4.97859e-07	0.00022462	Up				LOC_Os01g05064	expressed protein
TraesCS7A02G472200	6.53195	6.52479e-05	0.00737706	Up	AT3G06190	BPM2	BTB/POZ and MATH domain-containing protein 2	LOC_Os06g14060	MBTB10 - Bric-a-Brac
TraesCS6B02G385500	6.52982	2.63532e-06	0.00079897	Up	AT2G37710	LECRK41	L-type lectin-domain containing receptor kinase IV.1	LOC_Os07g38810	lectin receptor-type protein kinase
TraesCS6D02G249300	6.52892	2.30771e-05	0.00359616	Up	AT5G16810		Protein kinase superfamily protein	LOC_Os02g46750	expressed protein
TraesCS3A02G136700	6.52608	1.65405e-05	0.00289676	Up	AT4G14430	ECI2	Enoyl-CoA delta isomerase 2%2C peroxisomal	LOC_Os01g10830	carnitine racemase like protein
TraesCS1B02G470300	6.50862	1.66771e-05	0.00290458	Up	AT3G14470	RPPL1	Putative disease resistance RPP13-like protein 1	LOC_Os11g10770	disease resistance protein RGA3
TraesCS2A02G302700	6.48044	2.39406e-07	0.000132648	Up	AT1G49740		PLC-like phosphodiesterases superfamily protein	LOC_Os04g35100	phospholipase C
TraesCS6A02G187400	6.48009	0.000126942	0.0115093	Up	AT5G25930		Protein kinase family protein with leucine-rich repeat domain	LOC_Os02g12910	receptor-like protein kinase 5 precursor
TraesCS4A02G344000	6.46114	4.4e-05	0.00567959	Up	AT1G73030	CHMP1B	ESCRT-related protein CHMP1B	LOC_Os06g43590	SNF7 domain containing protein
TraesCS6A02G078700	6.45737	1.27558e-05	0.00243171	Up	AT2G19130		G-type lectin S-receptor-like serine/threonine-protein kinase At2g19130	LOC_Os01g12290	S-locus lectin protein kinase family protein
TraesCS3D02G479800	6.44768	9.41394e-05	0.00942144	Up	AT2G01170	BAT1	Amino-acid permease BAT1	LOC_Os01g71760	amino acid permease family protein
TraesCS5A02G152200	6.43823	6.85341e-05	0.00761235	Up	AT2G30130	LBD12	LOB domain-containing protein 12	LOC_Os03g45750	DUF260 domain containing protein
TraesCS5B02G132900	6.4359	2.75747e-05	0.00404427	Up	AT2G41310	ARR8	Two-component response regulator ARR8	LOC_Os11g04720	OsRR10 type-A response regulator
TraesCS7D02G085900	6.42632	6.03644e-08	4.50338e-05	Up	AT1G21240	WAK3	Wall-associated receptor kinase 3	LOC_Os02g02120	OsWAK11 - OsWAK receptor-like protein kinase
TraesCS5B02G436800	6.40944	1.89266e-05	0.00316264	Up	AT2G32030		Acyl-CoA N-acyltransferases (NAT) superfamily protein	LOC_Os03g58010	acetyltransferase
TraesCS6A02G083100	6.37738	9.03656e-06	0.00192833	Up	AT4G12080	AHL1	AT-hook motif nuclear-localized protein 1	LOC_Os02g03270	AT hook motif domain containing protein
TraesCS2D02G274600	6.34967	6.29314e-06	0.0014686	Up	AT1G68920	BHLH49	Transcription factor bHLH49	LOC_Os04g28280	BEE 3
TraesCS7A02G051100	6.34934	9.6988e-05	0.00952252	Up	AT2G20830		transferases%3Bfolic acid binding	LOC_Os06g03740	folic acid binding protein
TraesCS2B02G347000	6.34123	6.07282e-06	0.00144204	Up	AT3G28150	AXY4L	Protein ALTERED XYLOGLUCAN 4-like	LOC_Os04g39130	expressed protein
TraesCS6A02G301100	6.32456	2.22339e-06	0.000709024	Up				LOC_Os02g51740	VQ domain containing protein
TraesCS6B02G259100	6.32097	1.93126e-05	0.00319569	Up	AT2G02220	PSKR1	Phytosulfokine receptor 1	LOC_Os02g41890	phytosulfokine receptor precursor
TraesCS5B02G332800	6.29901	1.62907e-06	0.000553219	Up				LOC_Os09g36950	expressed protein
TraesCS4D02G025500	6.29781	0.000419541	0.0247048	Up	AT5G62720		Integral membrane HPP family protein	LOC_Os03g48030	integral membrane HPP family protein
TraesCS2A02G193200	6.29086	8.65444e-07	0.000333323	Up	AT1G32120		FUNCTIONS IN: molecular_function unknown%3B INVOLVED IN: biological_process unknown%3B LOCATED IN: membrane%3B EXPRESSED IN: 14 plant structures%3B EXPRESSED DURING: 4 anthesis%2C C globular stage%2C F mature embryo stage%2C petal differentiation and expansion st /.../ expanded cotyledon stage%3B CONTAINS InterPro DOMAIN/s: Aminotransferase-like%2C plant mobile domain (InterPro:IPR019557)%2C Prot…	LOC_Os11g40570	plant viral response family protein
TraesCS5D02G339500	6.28754	5.01036e-05	0.0061731	Up	AT4G08850		Probable LRR receptor-like serine/threonine-protein kinase At4g08850	LOC_Os10g03050	leucine-rich repeat receptor protein kinase EXS precursor
TraesCS3D02G298300	6.28204	7.01585e-07	0.000290272	Up	AT5G55570		unknown protein%3B LOCATED IN: chloroplast%3B Has 35333 Blast hits to 34131 proteins in 2444 species: Archae - 798%3B Bacteria - 22429%3B Metazoa - 974%3B Fungi - 991%3B Plants - 531%3B Viruses - 0%3B Other Eukaryotes - 9610 (source: NCBI BLink).	LOC_Os01g55670	expressed protein
TraesCS4A02G106100	6.27588	5.34402e-05	0.00645149	Up				LOC_Os03g17670	expressed protein
TraesCS2D02G376900	6.26916	7.17875e-06	0.0016431	Up	AT2G28305	LOG1	Cytokinin riboside 5'-monophosphate phosphoribohydrolase LOG1	LOC_Os04g43840	possible lysine decarboxylase domain containing protein
TraesCS2D02G292300	6.26612	1.04933e-05	0.00213805	Up	AT3G52740		unknown protein%3B BEST Arabidopsis thaliana protein match is: unknown protein (TAIR:AT3G44450.1)%3B Has 65 Blast hits to 65 proteins in 13 species: Archae - 0%3B Bacteria - 0%3B Metazoa - 0%3B Fungi - 0%3B Plants - 65%3B Viruses - 0%3B Other Eukaryotes - 0 (source /.../ BLink).	LOC_Os04g33610	expressed protein
TraesCS3A02G139900	6.2654	7.00542e-05	0.00771219	Up	AT2G27940	ATL57	RING-H2 finger protein ATL57	LOC_Os01g11520	RING-H2 finger protein
TraesCS5D02G237600	6.25872	1.99863e-05	0.0032705	Up	AT1G23110		unknown protein%3B FUNCTIONS IN: molecular_function unknown%3B LOCATED IN: chloroplast%3B BEST Arabidopsis thaliana protein match is: unknown protein (TAIR:AT1G70900.1)%3B Has 59 Blast hits to 59 proteins in 15 species: Archae - 0%3B Bacteria - 0%3B Metazoa - 0 /.../i - 0%3B Plants - 59%3B Viruses - 0%3B Other Eukaryotes - 0 (source: NCBI BLink).	LOC_Os08g33640	expressed protein
TraesCS1B02G336200	6.25711	0.000103633	0.0100499	Up				LOC_Os05g42340	ubiquitin E3 ligase ICP0
TraesCS1D02G251200	6.25321	2.88546e-07	0.000150212	Up	AT5G45500		RNI-like superfamily protein	LOC_Os04g41380	Leucine Rich Repeat family protein
TraesCS2B02G043100	6.24772	4.69379e-05	0.00592167	Up	AT5G50380	ATEXO70F1	exocyst subunit exo70 family protein F1	LOC_Os04g02070	expressed protein
TraesCS4A02G405600	6.24545	0.000341148	0.0217513	Up
TraesCS5B02G294700	6.24274	0.000327353	0.0212897	Up	AT1G02850	BGLU11	Beta-glucosidase 11	LOC_Os09g33680	Os9bglu31 - beta-glucosidase
TraesCS5A02G031700	6.2423	2.29044e-05	0.00357642	Up	AT3G17630	CHX19	Cation/H(+) antiporter 19	LOC_Os12g42200	ATCHX
TraesCS7A02G151900	6.23904	0.00118407	0.0478202	Up	AT1G30550		S-adenosyl-L-methionine-dependent methyltransferases superfamily protein	LOC_Os06g08800	RNA cap guanine-N2 methyltransferase domain containing protein
TraesCS6A02G066700	6.23783	4.55466e-08	3.50842e-05	Up	AT3G51530		F-box/FBD/LRR-repeat protein At3g51530	LOC_Os12g36000	expressed protein
TraesCS7D02G240400	6.23568	0.000914238	0.0405336	Up	AT2G37790	AKR4C10	Aldo-keto reductase family 4 member C10	LOC_Os01g62880	oxidoreductase
TraesCS6B02G217100	6.22335	1.77222e-06	0.000585055	Up	AT5G25930		Protein kinase family protein with leucine-rich repeat domain	LOC_Os02g12910	receptor-like protein kinase 5 precursor
TraesCS2D02G072500	6.2167	2.33892e-06	0.000731364	Up	AT1G74190	AtRLP15	receptor like protein 15	LOC_Os04g55420	leucine-rich repeat family protein
TraesCS5A02G457100	6.21367	2.11603e-05	0.00340961	Up	AT2G38840		Guanylate-binding family protein	LOC_Os07g08400	GTP binding protein
TraesCS2A02G457400	6.20084	0.000889051	0.0398836	Up				LOC_Os05g48790	expressed protein
TraesCS3D02G390700	6.18875	2.63768e-07	0.000139614	Up	AT2G31560		Protein of unknown function (DUF1685)	LOC_Os11g17930	expressed protein
TraesCS6B02G298300	6.18291	0.00104963	0.0444166	Up	AT1G78140		Uncharacterized methyltransferase At1g78140%2C chloroplastic	LOC_Os08g31750	methyltransferase
TraesCS2A02G473700	6.17367	9.80861e-06	0.00204698	Up				LOC_Os04g53496	NBS-LRR disease resistance protein
TraesCS6B02G127100	6.16478	2.32304e-06	0.000728803	Up				LOC_Os02g04130	DUF1645 domain containing protein
TraesCS6A02G265800	6.15507	2.4646e-05	0.00375024	Up	AT5G53520	OPT8	Oligopeptide transporter 8	LOC_Os03g54000	oligopeptide transporter
TraesCS5A02G116200	6.1465	1.75366e-05	0.00299373	Up
TraesCS1D02G159500	6.14415	1.45656e-06	0.000501828	Up				LOC_Os10g34700	expressed protein
TraesCS6A02G109700	6.13498	0.00122726	0.0488975	Up	AT2G38300		myb-like HTH transcriptional regulator family protein	LOC_Os02g14490	MYB family transcription factor
TraesCS5B02G525600	6.13149	0.000255591	0.0181191	Up	AT4G00240	PLDBETA2	Phospholipase D beta 2	LOC_Os10g38060	phospholipase D
TraesCS3D02G459300	6.12691	0.00100608	0.0431323	Up				LOC_Os08g33280	ulp1 protease family
TraesCS3D02G387300	6.11494	5.84941e-05	0.0068756	Up	AT3G57790		Pectin lyase-like superfamily protein	LOC_Os09g31270	polygalacturonase
TraesCS4D02G235500	6.11279	1.9123e-05	0.00317865	Up	AT1G75180		Erythronate-4-phosphate dehydrogenase family protein	LOC_Os03g12700	expressed protein
TraesCS7D02G101300	6.11027	2.25471e-05	0.00355587	Up	AT5G56630	PFK7	ATP-dependent 6-phosphofructokinase 7	LOC_Os06g05860	6-phosphofructokinase
TraesCS4B02G253900	6.10321	6.93896e-05	0.00768896	Up	AT1G52820		2-oxoglutarate (2OG) and Fe(II)-dependent oxygenase superfamily protein	LOC_Os08g32160	oxidoreductase
TraesCS7A02G366200	6.0994	2.4591e-07	0.000134676	Up	AT3G47090		Leucine-rich repeat protein kinase family protein	LOC_Os02g12400	receptor-like protein kinase precursor
TraesCS5A02G052600	6.09422	5.34463e-06	0.00131187	Up				LOC_Os05g15510	cellulase
TraesCS6A02G147100	6.08417	0.000151359	0.0128616	Up				LOC_Os12g08980	syntaxin-related protein KNOLLE
TraesCS6A02G106000	6.07494	0.00062863	0.0320388	Up	AT2G21045	STR19	Rhodanese-like domain-containing protein 19%2C mitochondrial	LOC_Os02g01220	rhodanese-like domain containing protein
TraesCS3A02G108600	6.0534	3.96008e-06	0.00106895	Up	AT1G10780		F-box protein At1g10780	LOC_Os08g36570	F-box protein
TraesCS5A02G510300	6.0529	0.000824616	0.0379083	Up	AT1G78610	MSL6	Mechanosensitive ion channel protein 6	LOC_Os02g44770	uncharacterized mscS family protein
TraesCS5B02G567200	6.05211	0.000711633	0.0348059	Up	AT3G14470	RPPL1	Putative disease resistance RPP13-like protein 1	LOC_Os01g71114	disease resistance protein RGA4
TraesCS4A02G034700	6.03737	0.00094043	0.0412891	Up	AT4G38540		FAD/NAD(P)-binding oxidoreductase family protein	LOC_Os03g05910	expressed protein
TraesCS7B02G335500	6.03677	9.97769e-06	0.00207768	Up	AT1G44350	ILL6	IAA-amino acid hydrolase ILR1-like 6	LOC_Os06g47620	peptidase
TraesCS6D02G394400	6.03602	0.000537581	0.0290268	Up	AT3G14470	RPPL1	Putative disease resistance RPP13-like protein 1	LOC_Os04g53160	NBS-LRR disease resistance protein
TraesCS1D02G190200	6.03536	0.000447845	0.0257005	Up	AT1G10370	GSTU17	Glutathione S-transferase U17	LOC_Os10g38710	glutathione S-transferase
TraesCS4A02G308300	6.03373	4.86457e-05	0.00606446	Up	AT3G14470	RPPL1	Putative disease resistance RPP13-like protein 1	LOC_Os06g49380	NBS-LRR disease resistance protein
TraesCS2A02G566200	6.02573	1.47637e-06	0.000506441	Up	AT1G71930	NAC030	NAC domain-containing protein 30	LOC_Os08g01330	no apical meristem protein
TraesCS6D02G281100	6.02481	6.34725e-05	0.0072455	Up	AT1G35910	TPPD	Probable trehalose-phosphate phosphatase D	LOC_Os02g51680	uncharacterized glycosyl hydrolase Rv2006/MT2062
TraesCS4A02G236700	6.02271	7.91191e-05	0.00830146	Up	AT1G47230	CYCA3-4	Cyclin-A3-4	LOC_Os03g41100	cyclin
TraesCS3B02G182400	5.99785	0.00116758	0.0473469	Up	AT2G25810	TIP4-1	Aquaporin TIP4-1	LOC_Os01g13130	aquaporin protein
TraesCS1D02G109900	5.98619	8.94919e-05	0.00904001	Up	AT3G17470	CRSH	Probable GTP diphosphokinase CRSH%2C chloroplastic	LOC_Os05g06890	relA-SpoT like protein RSH4
TraesCS2B02G157100	5.97922	0.000153706	0.0130143	Up	AT3G63470	SCPL40	Serine carboxypeptidase-like 40	LOC_Os07g46350	OsSCP40 - Putative Serine Carboxypeptidase homologue
TraesCS6B02G367100	5.97902	0.000129462	0.0116657	Up	AT2G05940		Protein kinase superfamily protein	LOC_Os02g53750	tyrosine protein kinase domain containing protein
TraesCS5B02G405500	5.97733	8.63712e-07	0.000333323	Up	AT5G43150		unknown protein%3B FUNCTIONS IN: molecular_function unknown%3B INVOLVED IN: biological_process unknown%3B LOCATED IN: mitochondrion%3B EXPRESSED IN: 22 plant structures%3B EXPRESSED DURING: 13 growth stages%3B Has 1807 Blast hits to 1807 proteins in 277 species /.../ae - 0%3B Bacteria - 0%3B Metazoa - 736%3B Fungi - 347%3B Plants - 385%3B Viruses - 0%3B Other Eukaryotes - 339 (source: NCBI BLink).	LOC_Os07g02460	expressed protein
TraesCS1A02G211500	5.97565	0.000263356	0.0184907	Up	AT4G16600	PGSIP7	Putative glucuronosyltransferase PGSIP7	LOC_Os10g40640	glycosyl transferase 8 domain containing protein
TraesCS6D02G325800	5.97096	0.00015839	0.0132115	Up	ATCG00580	PSBE	photosystem II reaction center protein E	LOC_Os06g39728	cytochrome b559 subunit alpha
TraesCS2D02G392600	5.94512	5.49808e-05	0.00658561	Up	AT2G35910	ATL70	RING-H2 finger protein ATL70	LOC_Os04g49170	zinc finger
TraesCS1B02G272000	5.94275	0.000916724	0.0406015	Up	AT5G24270	CBL4	Calcineurin B-like protein 4	LOC_Os02g18880	calcineurin B
TraesCS2B02G105400	5.93843	0.000135554	0.011936	Up	AT3G42670	CLSY1	SNF2 domain-containing protein CLASSY 1	LOC_Os07g49210	helicase conserved C-terminal domain containing protein
TraesCS4A02G030100	5.9334	1.31105e-05	0.00248433	Up	AT5G48720	XRI1	Protein XRI1	LOC_Os04g30790	expressed protein
TraesCS3A02G438500	5.93048	0.000122819	0.011243	Up	AT3G50950	RPP13L4	Disease resistance RPP13-like protein 4	LOC_Os11g38580	NBS-LRR type disease resistance protein
TraesCS3B02G199600	5.9296	0.000566535	0.0298567	Up	AT1G78780		pathogenesis-related family protein	LOC_Os01g14590	pathogen-related protein
TraesCS2A02G294800	5.92805	0.000699216	0.0344324	Up	AT3G52720	ACA1	Alpha carbonic anhydrase 1%2C chloroplastic	LOC_Os02g33030	bifunctional monodehydroascorbate reductase and carbonic anhydrasenectarin-3 precursor
TraesCS7A02G363300	5.91202	0.000136216	0.0119499	Up	AT5G40860		unknown protein%3B BEST Arabidopsis thaliana protein match is: unknown protein (TAIR:AT3G27210.1)%3B Has 69 Blast hits to 69 proteins in 12 species: Archae - 0%3B Bacteria - 0%3B Metazoa - 0%3B Fungi - 0%3B Plants - 67%3B Viruses - 0%3B Other Eukaryotes - 2 (source /.../ BLink).	LOC_Os12g25180	expressed protein
TraesCS1A02G356300	5.90592	6.26022e-06	0.00146452	Up	AT1G34300		G-type lectin S-receptor-like serine/threonine-protein kinase At1g34300	LOC_Os01g47840	S-locus-like receptor protein kinase
TraesCS3D02G506500	5.90328	2.14033e-05	0.00343708	Up	AT3G21690		MATE efflux family protein	LOC_Os03g37640	MATE efflux family protein
TraesCS1A02G352200	5.86779	0.000165202	0.0135352	Up	AT5G24270	CBL4	Calcineurin B-like protein 4	LOC_Os05g45810	calcineurin B
TraesCS5D02G199900	5.86589	8.94975e-05	0.00904001	Up	AT4G39830		Cupredoxin superfamily protein	LOC_Os09g20090	L-ascorbate oxidase precursor
TraesCS1B02G144500	5.85571	2.26339e-07	0.000126145	Up	AT1G10970	ZIP4	zinc transporter 4 precursor	LOC_Os05g10940	metal cation transporter
TraesCS3D02G346300	5.84459	0.00123828	0.0491344	Up	AT1G68660		Ribosomal protein L12/ ATP-dependent Clp protease adaptor protein ClpS family protein	LOC_Os01g61700	ATP-dependent Clp protease adaptor protein ClpS containing protein
TraesCS6A02G178600	5.84365	1.64511e-05	0.00288645	Up
TraesCS6A02G291300	5.81039	0.000160089	0.0133115	Up
TraesCS4B02G314300	5.80255	0.000343737	0.0218722	Up	AT1G22360	UGT85A2	UDP-glycosyltransferase 85A2	LOC_Os02g51930	cytokinin-O-glucosyltransferase 2
TraesCS5A02G230700	5.79944	0.000690144	0.034098	Up	AT1G59780		Putative disease resistance protein At1g59780	LOC_Os11g10770	disease resistance protein RGA3
TraesCS7D02G332500	5.79781	0.000710518	0.03479	Up	AT4G40070	ATL32	RING-H2 finger protein ATL32	LOC_Os06g34640	zinc finger
TraesCS3D02G105100	5.7935	0.000553087	0.0294501	Up	AT1G68810	BHLH30	Transcription factor bHLH30	LOC_Os01g06640	basic helix-loop-helix
TraesCS3A02G255300	5.78693	3.22731e-07	0.000160934	Up	AT3G14770	SWEET2	Bidirectional sugar transporter SWEET2	LOC_Os01g50460	nodulin MtN3 family protein
TraesCS7D02G546400	5.77869	0.000115987	0.0108375	Up	AT3G14460		Putative disease resistance protein At3g14460	LOC_Os04g53496	NBS-LRR disease resistance protein
TraesCS6B02G082600	5.7715	5.50988e-05	0.0065876	Up	AT5G22880	H2B	Histone H2B.10	LOC_Os05g49860	Core histone H2A/H2B/H3/H4 domain containing protein
TraesCS1B02G281200	5.76674	0.000656379	0.033046	Up	AT5G17210		Protein of unknown function (DUF1218)	LOC_Os05g35800	expressed protein
TraesCS5A02G248000	5.76371	1.9082e-05	0.00317865	Up				LOC_Os09g29300	clathrin assembly protein
TraesCS2B02G243000	5.75191	7.45969e-06	0.00168682	Up	AT4G23180	CRK10	Cysteine-rich receptor-like protein kinase 10	LOC_Os07g34980	TKL_IRAK_DUF26-lh.9 - DUF26 kinases have homology to DUF26 containing loci
TraesCS6A02G123300	5.74039	0.000202747	0.0156429	Up	AT5G06320	NHL3	NDR1/HIN1-like 3	LOC_Os12g06220	harpin-induced protein 1 domain containing protein
TraesCS3A02G362000	5.73973	3.03245e-06	0.000874776	Up	AT3G23160		Protein of unknown function (DUF668)	LOC_Os01g62670	avr9/Cf-9 rapidly elicited protein
TraesCS5B02G366600	5.71313	0.000233604	0.0171938	Up	AT1G79480		Carbohydrate-binding X8 domain superfamily protein	LOC_Os09g38784	retrotransposon protein
TraesCS6A02G157700	5.71018	0.000956254	0.0418095	Up	AT1G16290		FUNCTIONS IN: molecular_function unknown%3B INVOLVED IN: biological_process unknown%3B LOCATED IN: chloroplast%2C vacuole%3B EXPRESSED IN: 19 plant structures%3B EXPRESSED DURING: 11 growth stages%3B CONTAINS InterPro DOMAIN/s: Lytic transglycosylase-like%2C cata /.../(InterPro:IPR008258)%3B Has 171 Blast hits to 155 proteins in 40 species: Archae - 0%3B Bacteria - 54%3B Metazoa - 0%3B Fungi - 0%…	LOC_Os02g07480	transglycosylase SLT domain containing protein
TraesCS1B02G211600	5.71005	0.000245806	0.0176566	Up	AT4G23270	CRK19	Cysteine-rich receptor-like protein kinase 19	LOC_Os10g05250	protein kinase domain containing protein
TraesCS7D02G000800	5.6961	4.72275e-05	0.00594239	Up	AT4G21410	CRK29	Cysteine-rich receptor-like protein kinase 29	LOC_Os11g39420	jacalin-like lectin domain containing protein
TraesCS3A02G140000	5.69228	0.000264838	0.018491	Up	AT2G27940	ATL57	RING-H2 finger protein ATL57	LOC_Os01g11520	RING-H2 finger protein
TraesCSU02G135200	5.69185	0.000300247	0.0200757	Up	AT3G14470	RPPL1	Putative disease resistance RPP13-like protein 1	LOC_Os03g63150	powdery mildew resistance protein PM3b
TraesCSU02G018700	5.68269	1.22193e-05	0.00236272	Up	AT3G46730	RPP13L3	Putative disease resistance RPP13-like protein 3	LOC_Os12g17480	MLA12
TraesCS3D02G281900	5.6733	0.000156344	0.0131537	Up	AT1G29280	WRKY65	Probable WRKY transcription factor 65	LOC_Os01g53040	WRKY14
TraesCS5A02G215200	5.6576	0.000130358	0.0116722	Up	AT2G05940		Protein kinase superfamily protein	LOC_Os09g27010	tyrosine protein kinase domain containing protein
TraesCS5B02G516200	5.6552	0.00116886	0.0473469	Up	AT2G45680	TCP9	Transcription factor TCP9	LOC_Os08g43160	TCP family transcription factor
TraesCS7A02G103200	5.64906	8.28001e-05	0.00859253	Up	AT3G14470	RPPL1	Putative disease resistance RPP13-like protein 1	LOC_Os12g25170	NB-ARC domain containing disease resistance protein
TraesCS2A02G039400	5.6422	0.000345292	0.0219417	Up	AT1G61810	BGLU45	Beta-glucosidase 45	LOC_Os04g43390	Os4bglu16 - monolignol beta-glucoside homologue
TraesCS6B02G129111	5.63833	0.000194083	0.0151117	Up
TraesCS1B02G382500	5.62403	0.0010717	0.0450683	Up	AT3G14470	RPPL1	Putative disease resistance RPP13-like protein 1	LOC_Os03g37720	NBS-LRR type disease resistance protein Rps1-k-1
TraesCS6B02G359000	5.6141	8.64204e-05	0.00884232	Up	AT5G43260		chaperone protein dnaJ-related	LOC_Os02g30320	drought-induced protein 1
TraesCS1B02G262500	5.61387	0.000281046	0.0192411	Up	AT5G45540		Protein of unknown function (DUF594)	LOC_Os01g72380	expressed protein
TraesCS3B02G431500	5.60787	0.000122936	0.011243	Up				LOC_Os12g03400	expressed protein
TraesCS3A02G268800	5.60501	8.33855e-05	0.00861974	Up	AT4G21700		Protein of unknown function (DUF2921)	LOC_Os01g48620	expressed protein
TraesCS4D02G194100	5.59635	0.00115321	0.0470436	Up	AT1G07120		FUNCTIONS IN: molecular_function unknown%3B INVOLVED IN: biological_process unknown%3B LOCATED IN: chloroplast envelope%3B EXPRESSED IN: inflorescence meristem%2C petal%2C leaf whorl%2C flower%3B EXPRESSED DURING: 4 anthesis%2C petal differentiation and expansion s /.../BEST Arabidopsis thaliana protein match is: Tetratricopeptide repeat (TPR)-like superfamily protein (TAIR:AT4G18570.1)%3B Has 28…	LOC_Os03g18300	chloroplast unusual positioning protein
TraesCS1A02G144500	5.59568	8.33788e-07	0.000326438	Up	AT2G20370	KAM1	Xyloglucan galactosyltransferase KATAMARI1	LOC_Os10g32110	exostosin family domain containing protein
TraesCS6A02G177000	5.59536	8.56492e-06	0.00185643	Up	AT3G15620	UVR3	(6-4)DNA photolyase	LOC_Os02g10990	FAD binding domain of DNA photolyase domain containing protein
TraesCS7A02G224900	5.59508	0.00038712	0.023619	Up	AT1G19640	JMT	Jasmonate O-methyltransferase	LOC_Os06g22440	SAM dependent carboxyl methyltransferase
TraesCS1A02G273800	5.58941	0.000411508	0.0244691	Up	AT3G09110		Protein of unknown function (DUF674)	LOC_Os04g50800	expressed protein
TraesCS4B02G064400	5.58912	2.74305e-05	0.00402935	Up				LOC_Os03g52380	PIII5 - Proteinase inhibitor II family protein precursor
TraesCS3A02G229300	5.58601	4.32583e-05	0.00562987	Up	AT2G34830	WRKY35	Probable WRKY transcription factor 35	LOC_Os01g43550	WRKY12
TraesCS6B02G318500	5.56968	6.90019e-05	0.00765533	Up	AT3G14460		Putative disease resistance protein At3g14460	LOC_Os10g04490	expressed protein
TraesCS2D02G542500	5.56808	0.000205059	0.0157571	Up	AT5G50380	ATEXO70F1	exocyst subunit exo70 family protein F1	LOC_Os05g30640	leucine zipper protein-like
TraesCS7B02G123300	5.56554	2.45155e-05	0.00374636	Up	AT5G47740		Adenine nucleotide alpha hydrolases-like superfamily protein	LOC_Os06g18820	serine threonine kinase
TraesCS1B02G291800	5.5609	3.95187e-05	0.00526666	Up	AT4G21105		cytochrome-c oxidases%3Belectron carriers	LOC_Os02g06650	COX VIIa
TraesCS3B02G119700	5.54646	0.000108289	0.0103674	Up	AT3G27890	NQR	NADPH:quinone oxidoreductase	LOC_Os01g72430	NADPH quinone oxidoreductase
TraesCS3A02G102200	5.54124	6.15224e-06	0.0014464	Up	AT5G54960	PDC2	Pyruvate decarboxylase 2	LOC_Os01g06660	thiamine pyrophosphate enzyme
TraesCS1A02G113600	5.53587	8.56732e-05	0.00881718	Up	AT4G24670	TAR2	Tryptophan aminotransferase-related protein 2	LOC_Os01g07500	alliin lyase precursor
TraesCS3B02G416900	5.53391	0.000760886	0.0362455	Up	AT5G19000	BPM1	BTB/POZ and MATH domain-containing protein 1	LOC_Os10g29380	MBTB52 - Bric-a-Brac
TraesCS7D02G488500	5.53228	0.000106267	0.0102217	Up	AT1G54690	HTA3	Probable histone H2AXb	LOC_Os12g34510	Core histone H2A/H2B/H3/H4 domain containing protein
TraesCS2A02G555300	5.53224	0.00124999	0.0494288	Up	AT1G50320	ATHX	Thioredoxin X%2C chloroplastic	LOC_Os04g57930	thioredoxin
TraesCS2D02G332300	5.52666	0.000271338	0.0187925	Up	AT5G56270	WRKY2	Probable WRKY transcription factor 2	LOC_Os04g39570	WRKY35
TraesCS1D02G275700	5.52562	4.71104e-05	0.00593553	Up	AT2G27500		Glucan endo-1%2C3-beta-glucosidase 14	LOC_Os01g64170	glycosyl hydrolases family 17
TraesCS6D02G135800	5.51796	2.89296e-05	0.0041975	Up	AT5G13110	G6PD2	Glucose-6-phosphate 1-dehydrogenase 2%2C chloroplastic	LOC_Os03g29950	glucose-6-phosphate 1-dehydrogenase
TraesCS5B02G413200	5.51282	0.000598283	0.0310093	Up	AT5G42765		INVOLVED IN: biological_process unknown%3B LOCATED IN: thylakoid%2C chloroplast thylakoid membrane%2C chloroplast%3B EXPRESSED IN: 22 plant structures%3B EXPRESSED DURING: 13 growth stages%3B CONTAINS InterPro DOMAIN/s: Twin-arginine translocation pathway%2C sign /.../uence (InterPro:IPR006311)%3B Has 30201 Blast hits to 17322 proteins in 780 species: Archae - 12%3B Bacteria - 1396%3B Metazoa - 1…	LOC_Os03g56320	expressed protein
TraesCS7A02G278900	5.50773	0.000216364	0.0163213	Up	AT3G44380		Late embryogenesis abundant (LEA) hydroxyproline-rich glycoprotein family	LOC_Os08g44410	harpin-induced protein 1 domain containing protein
TraesCS6A02G283500	5.50192	6.0548e-06	0.00144138	Up	AT5G10770		Eukaryotic aspartyl protease family protein	LOC_Os02g48870	aspartic proteinase nepenthesin-2 precursor
TraesCS1D02G002600	5.49696	3.00612e-08	2.43434e-05	Up	AT3G10640	VPS60.1	SNF7 family protein	LOC_Os05g01250	SNF7 domain containing protein
TraesCS2A02G491500	5.48264	0.00026127	0.0183773	Up				LOC_Os09g04310	expressed protein
TraesCS1A02G276600	5.48129	0.000108657	0.0103674	Up	AT1G08320	TGA9	bZIP transcription factor family protein	LOC_Os05g37170	transcription factor
TraesCS3B02G570600	5.47239	5.223e-05	0.00635248	Up	AT1G61480		G-type lectin S-receptor-like serine/threonine-protein kinase At1g61480	LOC_Os11g39490	jacalin-like lectin domain containing protein
TraesCS1A02G390500	5.45832	2.961e-05	0.00423861	Up	AT1G14870	PCR2	Protein PLANT CADMIUM RESISTANCE 2	LOC_Os02g36940	uncharacterized Cys-rich domain containing protein
TraesCS4D02G004600	5.45709	0.0004899	0.0273121	Up				LOC_Os09g26999	keratin-associated protein 5-4
TraesCS2D02G297100	5.4494	0.000802154	0.0373469	Up	AT2G19130		G-type lectin S-receptor-like serine/threonine-protein kinase At2g19130	LOC_Os05g07420	S-domain receptor-like protein kinase
TraesCS7B02G424300	5.44675	3.66908e-07	0.000179191	Up				LOC_Os07g36830	OsFBX250 - F-box domain containing protein
TraesCS5B02G125400	5.4401	0.0010822	0.0453291	Up	AT3G52525	OFP6	Transcription repressor OFP6	LOC_Os12g06160	DUF623 domain containing protein
TraesCS6B02G057400	5.43508	5.10132e-06	0.00127865	Up	AT1G21680		DPP6 N-terminal domain-like protein	LOC_Os03g28980	WD40-like Beta Propeller Repeat family protein
TraesCS4D02G231400	5.43485	0.000268113	0.0186236	Up	AT1G14700	PAP3	Purple acid phosphatase 3	LOC_Os03g13540	Ser/Thr protein phosphatase family protein
TraesCS3B02G247300	5.41988	7.44658e-05	0.00800833	Up
TraesCS2D02G359000	5.41647	0.000171134	0.0138452	Up	AT5G12890	UGT92A1	UDP-glycosyltransferase 92A1	LOC_Os04g42690	UDP-glucoronosyl and UDP-glucosyl transferase domain containing protein
TraesCS5B02G083300	5.41613	0.000239459	0.0174444	Up	AT5G08050		Protein of unknown function (DUF1118)	LOC_Os12g38640	expressed protein
TraesCS7D02G421800	5.41086	1.21707e-05	0.00235813	Up	AT5G57345		unknown protein%3B Has 30201 Blast hits to 17322 proteins in 780 species: Archae - 12%3B Bacteria - 1396%3B Metazoa - 17338%3B Fungi - 3422%3B Plants - 5037%3B Viruses - 0%3B Other Eukaryotes - 2996 (source: NCBI BLink).	LOC_Os06g47970	expressed protein
TraesCS1A02G012900	5.40617	0.000429645	0.025066	Up	AT4G14430	ECI2	Enoyl-CoA delta isomerase 2%2C peroxisomal	LOC_Os11g16960	carnitine racemase like protein
TraesCS5A02G064300	5.39844	0.00116306	0.0472535	Up	AT4G28430	RTNLB18	Reticulon-like protein B18	LOC_Os02g19990	reticulon domain containing protein
TraesCS4B02G061500	5.39807	9.91436e-05	0.00970399	Up	AT5G09640	SCPL19	Serine carboxypeptidase-like 19	LOC_Os03g52040	OsSCP19 - Putative Serine Carboxypeptidase homologue
TraesCS6D02G270100	5.39294	1.49839e-05	0.00271446	Up	AT3G14460		Putative disease resistance protein At3g14460	LOC_Os10g04490	expressed protein
TraesCS1B02G465000	5.38742	1.54211e-05	0.00277247	Up	AT3G50930	BCS1	cytochrome BC1 synthesis	LOC_Os05g51130	mitochondrial chaperone BCS1
TraesCS7D02G092700	5.38545	0.000628405	0.0320388	Up	AT5G27560		Domain of unknown function (DUF1995)	LOC_Os06g05390	expressed protein
TraesCS4A02G327200	5.36477	1.71543e-05	0.00296048	Up	AT3G47570		Probable LRR receptor-like serine/threonine-protein kinase At3g47570	LOC_Os11g10310	receptor-like protein kinase 2 precursor
TraesCS3A02G144900	5.36105	0.000630677	0.0320914	Up				LOC_Os01g12110	expressed protein
TraesCS3A02G200600	5.35983	3.22416e-06	0.000908018	Up
TraesCS4B02G088700	5.35906	0.000728123	0.0353597	Up	AT1G07160		Probable protein phosphatase 2C 2	LOC_Os11g13820	protein phosphatase 2C
TraesCS5A02G113200	5.35118	1.03033e-05	0.0021174	Up	AT1G44170	ALDH3H1	Aldehyde dehydrogenase family 3 member H1	LOC_Os12g07810	aldehyde dehydrogenase
TraesCS2A02G424800	5.34055	0.000130687	0.0116812	Up	AT3G22142		Bifunctional inhibitor/lipid-transfer protein/seed storage 2S albumin superfamily protein	LOC_Os04g52260	LTPL124 - Protease inhibitor/seed storage/LTP family protein precursor
TraesCS4A02G001300	5.33827	0.000968291	0.0421636	Up	AT1G06160	ERF094	Ethylene-responsive transcription factor ERF094	LOC_Os09g39850	AP2 domain containing protein
TraesCS3D02G494400	5.33518	1.7484e-05	0.00299079	Up	AT2G32640		Lycopene beta/epsilon cyclase protein	LOC_Os08g32630	FAD dependent oxidoreductase
TraesCS3B02G427400	5.33037	0.000542759	0.0292017	Up				LOC_Os01g67390	POEI32 - Pollen Ole e I allergen and extensin family protein precursor
TraesCS6A02G259200	5.32673	0.00053029	0.028809	Up	AT2G42360	ATL41	E3 ubiquitin-protein ligase ATL41	LOC_Os02g45780	zinc finger
TraesCS2A02G127500	5.31487	0.000784295	0.0368961	Up	AT4G04880		adenosine/AMP deaminase family protein	LOC_Os07g46630	AMP deaminase
TraesCS5B02G007500	5.29644	0.000327215	0.0212897	Up	AT3G04710	TPR10	ankyrin repeat family protein	LOC_Os12g43940	ankyrin repeat domain-containing protein
TraesCS2A02G432800	5.29506	0.000114698	0.0107596	Up	AT2G19330	PIRL6	Plant intracellular Ras-group-related LRR protein 6	LOC_Os04g51580	leucine rich repeat containing protein
TraesCS3B02G476000	5.29375	0.000536745	0.02901	Up	AT3G26744	SCRM	Transcription factor ICE1	LOC_Os01g70310	inducer of CBF expression 2
TraesCS4D02G091800	5.2832	0.00114093	0.0468772	Up
TraesCS3A02G056000	5.27707	0.000265178	0.0185012	Up	AT2G38090		Duplicated homeodomain-like superfamily protein	LOC_Os01g04930	MYB family transcription factor
TraesCS1D02G205800	5.277	0.00121812	0.0486558	Up	AT2G02060		Homeodomain-like superfamily protein	LOC_Os10g39550	MYB family transcription factor
TraesCS1B02G264300	5.27536	1.6939e-05	0.002934	Up	AT1G75130	CYP721A1	cytochrome P450%2C family 721%2C subfamily A%2C polypeptide 1	LOC_Os05g33600	cytochrome P450 72A1
TraesCS4B02G311900	5.27306	0.000424867	0.0248638	Up	AT3G47570		Probable LRR receptor-like serine/threonine-protein kinase At3g47570	LOC_Os11g36150	receptor-like protein kinase 2 precursor
TraesCS5A02G281700	5.27271	0.000671663	0.0335286	Up	AT5G43580		Serine protease inhibitor%2C potato inhibitor I-type family protein	LOC_Os12g25090	expressed protein
TraesCS1D02G282000	5.26542	0.000157111	0.0131731	Up	AT5G02090		unknown protein%3B Has 30 Blast hits to 30 proteins in 10 species: Archae - 0%3B Bacteria - 0%3B Metazoa - 0%3B Fungi - 0%3B Plants - 30%3B Viruses - 0%3B Other Eukaryotes - 0 (source: NCBI BLink).	LOC_Os05g38264	expressed protein
TraesCS1A02G282300	5.25866	0.000269135	0.0186809	Up	AT2G37770	AKR4C9	Aldo-keto reductase family 4 member C9	LOC_Os05g38230	oxidoreductase
TraesCS5A02G440600	5.25386	4.03663e-06	0.00107734	Up	AT3G14470	RPPL1	Putative disease resistance RPP13-like protein 1	LOC_Os06g41480	vrga1
TraesCS3D02G461200	5.23591	0.000370045	0.0229695	Up	AT3G11340		UDP-Glycosyltransferase superfamily protein	LOC_Os07g13800	cytokinin-N-glucosyltransferase
TraesCS2D02G085800	5.2341	0.000504405	0.0278823	Up	AT1G32100	PRR1	Pinoresinol reductase 1	LOC_Os12g16410	isoflavone reductase
TraesCS3D02G072100	5.21845	0.000228308	0.0169127	Up	AT3G51550	FER	Receptor-like protein kinase FERONIA	LOC_Os05g25450	TKL_IRAK_CrRLK1L-1.3 - The CrRLK1L-1 subfamily has homology to the CrRLK1L homolog
TraesCS7A02G216100	5.2148	0.000674902	0.0336108	Up	AT5G47740		Adenine nucleotide alpha hydrolases-like superfamily protein	LOC_Os06g18820	serine threonine kinase
TraesCS7D02G290000	5.20547	0.000275481	0.0189686	Up	AT1G51550		F-box/kelch-repeat protein At1g51550	LOC_Os08g13360	kelch repeat protein
TraesCS7D02G439400	5.19822	0.000253246	0.0180178	Up	AT4G15550	UGT75D1	UDP-glycosyltransferase 75D1	LOC_Os02g10880	UDP-glucoronosyl and UDP-glucosyl transferase domain containing protein
TraesCSU02G200800	5.19477	0.000249884	0.0178688	Up	AT1G55210	DIR20	Dirigent protein 20	LOC_Os07g42570	dirigent
TraesCS7A02G413300	5.19274	0.000148857	0.0127635	Up	AT2G02040	NPF8.3	Protein NRT1/ PTR FAMILY 8.3	LOC_Os06g49250	peptide transporter PTR2
TraesCS1D02G223400	5.19044	0.000172094	0.0138886	Up	AT2G40095		Alpha/beta hydrolase related protein	LOC_Os10g39090	hydrolase
TraesCS7B02G265000	5.18895	0.000133551	0.0118367	Up	AT2G36870	XTH32	Probable xyloglucan endotransglucosylase/hydrolase protein 32	LOC_Os07g29750	glycosyl hydrolases family 16
TraesCS5A02G324300	5.18085	0.00104003	0.0441087	Up	AT2G45360		Protein of unknown function (DUF1442)	LOC_Os02g25780	expressed protein
TraesCS1A02G311900	5.16233	3.89758e-05	0.00520846	Up	AT2G16770	bZIP23	Basic-leucine zipper (bZIP) transcription factor family protein	LOC_Os05g41540	bZIP transcription factor domain containing protein
TraesCSU02G052700	5.14865	0.000680065	0.0337879	Up
TraesCS5D02G044700	5.14689	0.000451701	0.0258591	Up	AT3G20150		Kinesin motor family protein	LOC_Os03g39020	Kinesin motor domain domain containing protein
TraesCS5D02G059000	5.14455	0.000410846	0.0244691	Up				LOC_Os08g09440	expressed protein
TraesCS2A02G425800	5.13511	7.15014e-12	2.77913e-08	Up	AT2G14720	VSR4	Vacuolar-sorting receptor 4	LOC_Os11g02464	vacuolar-sorting receptor precursor
TraesCS7A02G127100	5.13393	0.000192771	0.015082	Up	AT1G34300		G-type lectin S-receptor-like serine/threonine-protein kinase At1g34300	LOC_Os01g48040	S-locus-like receptor protein kinase
TraesCS1B02G048200	5.12764	0.000412434	0.0244811	Up	AT2G37040	PAL1	Phenylalanine ammonia-lyase 1	LOC_Os04g43800	phenylalanine ammonia-lyase
TraesCS1A02G430100	5.12458	0.000317845	0.0208984	Up	AT3G50940		P-loop containing nucleoside triphosphate hydrolases superfamily protein	LOC_Os05g51130	mitochondrial chaperone BCS1
TraesCS1D02G210900	5.12056	0.000412643	0.0244811	Up	AT5G52420		unknown protein%3B FUNCTIONS IN: molecular_function unknown%3B INVOLVED IN: biological_process unknown%3B LOCATED IN: endoplasmic reticulum%3B EXPRESSED IN: 24 plant structures%3B EXPRESSED DURING: 13 growth stages%3B BEST Arabidopsis thaliana protein match is: /.../wn protein (TAIR:AT5G23920.1)%3B Has 30201 Blast hits to 17322 proteins in 780 species: Archae - 12%3B Bacteria - 1396%3B Metazoa - …	LOC_Os10g40040	expressed protein
TraesCS2D02G137300	5.10988	0.000319448	0.0209602	Up	AT2G37710	LECRK41	L-type lectin-domain containing receptor kinase IV.1	LOC_Os07g38810	lectin receptor-type protein kinase
TraesCS1B02G113800	5.10313	0.000332994	0.0215164	Up	AT3G62760	GSTF13	Glutathione S-transferase F13	LOC_Os05g05620	glutathione S-transferase
TraesCS5B02G136900	5.09291	0.00124405	0.0492423	Up	AT3G56930	PAT04	Probable protein S-acyltransferase 4	LOC_Os11g03910	zinc finger DHHC domain-containing protein
TraesCS5B02G174300	5.0912	0.000454845	0.0259754	Up	AT1G64230	UBC28	Ubiquitin-conjugating enzyme E2 28	LOC_Os09g12230	ubiquitin-conjugating enzyme
TraesCS3A02G095700	5.09033	0.000321615	0.021044	Up	AT3G46730	RPP13L3	Putative disease resistance RPP13-like protein 3	LOC_Os01g70080	NB-ARC domain containing protein
TraesCS5D02G225100	5.08405	0.000717621	0.0349932	Up	AT5G57500		Galactosyltransferase family protein	LOC_Os09g26300	hypro1
TraesCS6A02G082000	5.08238	0.00110486	0.0459773	Up	AT1G64950	CYP89A5	cytochrome P450%2C family 89%2C subfamily A%2C polypeptide 5	LOC_Os04g03890	cytochrome P450
TraesCS6D02G133100	5.07639	0.000257256	0.0182031	Up	AT1G78600	BBX22	B-box zinc finger protein 22	LOC_Os12g10660	B-box zinc finger family protein
TraesCS2A02G358100	5.0759	0.000186499	0.0147619	Up	AT1G80050	APT2	Adenine phosphoribosyltransferase 2	LOC_Os02g40010	phosphoribosyl transferase
TraesCS2A02G125400	5.06604	0.000231229	0.0170657	Up	AT3G12860		NOP56-like pre RNA processing ribonucleoprotein	LOC_Os03g22880	nucleolar protein 5A
TraesCS4A02G325900	5.06225	0.000472805	0.0266012	Up	AT2G19130		G-type lectin S-receptor-like serine/threonine-protein kinase At2g19130	LOC_Os01g12290	S-locus lectin protein kinase family protein
TraesCS3A02G183200	5.04211	0.000313681	0.0207152	Up	AT4G02860		Phenazine biosynthesis PhzC/PhzF protein	LOC_Os01g16146	phenazine biosynthesis protein
TraesCS4D02G026100	5.04031	0.000405748	0.0244393	Up	AT4G14770	TCX2	Protein tesmin/TSO1-like CXC 2	LOC_Os07g07974	tesmin/TSO1-like CXC domain containing protein
TraesCS4D02G264000	5.02963	0.000720778	0.0350809	Up	AT1G78000	SULTR1%3B2	Sulfate transporter 1.2	LOC_Os08g31410	sulfate transporter
TraesCS1B02G262400	5.02961	0.000997269	0.0429543	Up	AT3G14470	RPPL1	Putative disease resistance RPP13-like protein 1	LOC_Os04g41370	Leucine Rich Repeat family protein
TraesCS6D02G008500	5.02702	0.000544552	0.0292152	Up	AT2G17850	STR17	Rhodanese-like domain-containing protein 17	LOC_Os12g24020	rhodanese-like domain containing protein
TraesCS1A02G158200	5.02219	0.000433447	0.0252249	Up				LOC_Os10g34010	expressed protein
TraesCS2D02G479200	5.01662	0.000568221	0.0298927	Up				LOC_Os04g53730	expressed protein
TraesCS5B02G529200	5.01402	0.000584904	0.0304658	Up	AT1G11350	SD113	G-type lectin S-receptor-like serine/threonine-protein kinase SD1-13	LOC_Os11g39490	jacalin-like lectin domain containing protein
TraesCS5D02G121500	5.0038	0.000235252	0.0172517	Up	AT1G78160	APUM7	Putative pumilio homolog 7%2C chloroplastic	LOC_Os12g31000	pumilio-family RNA binding repeat domain containing protein
TraesCS1B02G217900	4.99767	0.000526869	0.0287127	Up	AT2G16990		Major facilitator superfamily protein	LOC_Os02g44730	tetracycline transporter protein
TraesCS2B02G100200	4.99709	3.17887e-06	0.000899062	Up	AT1G50180		Putative disease resistance protein At1g50180	LOC_Os11g37880	stripe rust resistance protein Yr10
TraesCS1B02G267500	4.99699	0.000571218	0.0299837	Up	AT4G14170	PCMP-E17	Pentatricopeptide repeat-containing protein At4g14170	LOC_Os05g33920	pentatricopeptide
TraesCS1A02G354100	4.99625	0.0003749	0.0231553	Up	AT3G14460		Putative disease resistance protein At3g14460	LOC_Os07g02630	expressed protein
TraesCS2B02G425700	4.99527	0.000308927	0.0205113	Up				LOC_Os10g34614	csAtPR5
TraesCS3A02G125700	4.99394	0.000803633	0.037379	Up	AT2G36760	UGT73C2	UDP-glycosyltransferase 73C2	LOC_Os05g08480	cytokinin-O-glucosyltransferase 1
TraesCS2A02G351600	4.97468	0.0012384	0.0491344	Up	AT5G25460		Protein of unknown function%2C DUF642	LOC_Os04g41759	expressed protein
TraesCS5B02G431000	4.94691	5.44703e-06	0.00132707	Up	AT3G03770		Probable inactive leucine-rich repeat receptor-like protein kinase At3g03770	LOC_Os03g57780	protein kinase
TraesCS6D02G002223	4.94094	0.00112616	0.046454	Up
TraesCS7B02G284700	4.93917	6.65777e-05	0.00746505	Up	AT4G21700		Protein of unknown function (DUF2921)	LOC_Os01g48620	expressed protein
TraesCS6A02G224000	4.93715	0.000554506	0.0294821	Up	AT3G23250	MYB15	myb domain protein 15	LOC_Os02g41510	MYB family transcription factor
TraesCS5B02G089200	4.93404	0.000584058	0.0304385	Up	AT5G59780	MYB59	Transcription factor MYB59	LOC_Os12g37970	MYB family transcription factor
TraesCS6D02G132700	4.92342	1.69013e-05	0.002934	Up				LOC_Os05g45990	OsFBX171 - F-box domain containing protein
TraesCS2B02G184300	4.92319	9.77652e-05	0.00958889	Up	AT2G38900		Serine protease inhibitor%2C potato inhibitor I-type family protein	LOC_Os01g42860	inhibitor I family protein
TraesCS3A02G085700	4.91386	0.000303272	0.0202066	Up	AT2G22190	TPPE	Probable trehalose-phosphate phosphatase E	LOC_Os02g51680	uncharacterized glycosyl hydrolase Rv2006/MT2062
TraesCS2D02G601500	4.88722	0.000686879	0.0340659	Up	AT1G63220		C2 domain-containing protein At1g63220	LOC_Os04g58570	C2 domain containing protein
TraesCS5B02G407400	4.87919	0.000723346	0.0351637	Up	AT2G26500		cytochrome b6f complex subunit (petM)%2C putative	LOC_Os03g55720	cytochrome b6f complex subunit
TraesCS1A02G035700	4.87739	0.000247032	0.0177313	Up	AT1G21240	WAK3	Wall-associated receptor kinase 3	ChrUn.fgenesh.mRNA	expressed protein
TraesCS7D02G272800	4.8712	9.50607e-05	0.00946073	Up				LOC_Os08g43630	expressed protein
TraesCS3B02G439100	4.85937	0.000879914	0.0396237	Up	AT2G03880	PCMP-H44	Pentatricopeptide repeat-containing protein At2g03880%2C mitochondrial	LOC_Os01g66160	pentatricopeptide
TraesCS7D02G157300	4.85915	0.000166442	0.0135945	Up	AT1G53820	ATL60	RING-H2 finger protein ATL60	LOC_Os06g09310	zinc finger
TraesCS3B02G410500	4.85333	0.000436711	0.0253689	Up	AT4G29230	anac075	NAC domain containing protein 75	LOC_Os01g09550	no apical meristem protein
TraesCS2A02G167300	4.83044	1.11098e-05	0.00222538	Up	AT1G72310	ATL3	RING-H2 finger protein ATL3	LOC_Os07g42610	RING finger protein
TraesCS3B02G037000	4.82247	0.000438401	0.0254182	Up				LOC_Os01g03380	BBTI6 - Bowman-Birk type bran trypsin inhibitor precursor
TraesCS6A02G315900	4.8077	0.000863608	0.0391687	Up				LOC_Os02g52170	expressed protein
TraesCS7B02G123100	4.79544	0.000516918	0.0282608	Up	AT3G16520	UGT88A1	UDP-glycosyltransferase 88A1	LOC_Os06g18140	UDP-glucoronosyl and UDP-glucosyl transferase domain containing protein
TraesCS7D02G391200	4.79326	0.000129156	0.0116657	Up				LOC_Os04g11660	OsFBX119 - F-box domain containing protein
TraesCS3A02G146800	4.77935	0.000788143	0.0370012	Up	AT1G17745	PGDH2	D-3-phosphoglycerate dehydrogenase 2%2C chloroplastic	LOC_Os08g34720	D-3-phosphoglycerate dehydrogenase
TraesCS3D02G238400	4.76619	0.000280622	0.0192387	Up	AT5G41790	CIP1	COP1-interactive protein 1	LOC_Os01g46810	viral A-type inclusion protein repeat containing protein
TraesCS3B02G359100	4.76397	2.67951e-06	0.000803801	Up	AT3G12710		DNA glycosylase superfamily protein	LOC_Os01g58550	methyladenine glycosylase
TraesCS6D02G329700	4.73047	0.000302721	0.0201841	Up	AT2G48020		Sugar transporter ERD6-like 7	LOC_Os11g42430	transporter family protein
TraesCS7B02G211100	4.72982	0.0011451	0.0469339	Up	AT2G39760	BPM3	BTB/POZ and MATH domain-containing protein 3	LOC_Os08g03470	MBTB15 - Bric-a-Brac
TraesCS6B02G152700	4.72514	0.000153051	0.0129704	Up	AT1G72300	PSYR1	Tyrosine-sulfated glycopeptide receptor 1	LOC_Os02g06090	phytosulfokine receptor precursor
TraesCS4A02G331100	4.72329	0.000747954	0.0360468	Up	AT1G66950	ABCG39	ABC transporter G family member 39	LOC_Os07g33780	pleiotropic drug resistance protein 5
TraesCS1D02G211200	4.71806	0.000168474	0.0137251	Up	AT2G45910	PUB33	U-box domain-containing protein 33	LOC_Os10g40490	U-box domain containing protein
TraesCS4A02G059600	4.70362	0.000297307	0.0199072	Up	AT4G37790	HAT22	Homeobox-leucine zipper protein HAT22	LOC_Os03g12860	homeobox associated leucine zipper
TraesCS7B02G061300	4.69777	0.000678345	0.0337378	Up	AT1G09200	HTR2	Histone H3.2	LOC_Os01g64640	histone H3
TraesCS3B02G589500	4.69754	0.00082265	0.0378547	Up	AT3G46730	RPP13L3	Putative disease resistance RPP13-like protein 3	LOC_Os08g42670	resistance protein
TraesCS4D02G002100	4.68019	0.000290264	0.0195879	Up
TraesCS4D02G076700	4.65877	0.000407177	0.0244691	Up	AT2G24960		unknown protein%3B BEST Arabidopsis thaliana protein match is: unknown protein (TAIR:AT4G02210.2)%3B Has 1453 Blast hits to 509 proteins in 26 species: Archae - 0%3B Bacteria - 0%3B Metazoa - 1%3B Fungi - 39%3B Plants - 1363%3B Viruses - 0%3B Other Eukaryotes - 50 /.../e: NCBI BLink).	LOC_Os02g56830	transposon protein
TraesCS5D02G376900	4.65191	0.000141671	0.0122919	Up	ATCG00660	RPL20	50S ribosomal protein L20%2C chloroplastic	LOC_Os08g15306	chloroplast 50S ribosomal protein L20
TraesCS3A02G020400	4.64945	0.000910809	0.0404518	Up	AT2G20370	KAM1	Xyloglucan galactosyltransferase KATAMARI1	LOC_Os10g32080	xyloglucan galactosyltransferase KATAMARI1
TraesCS2B02G510100	4.64293	0.000513699	0.0281364	Up	AT3G20660	2025-10-04	Organic cation/carnitine transporter 4	LOC_Os04g53930	organic cation transporter protein
TraesCS4D02G240900	4.63668	0.000649024	0.032831	Up	AT3G56630	CYP94D2	cytochrome P450%2C family 94%2C subfamily D%2C polypeptide 2	LOC_Os03g12260	cytochrome P450 protein
TraesCS2A02G384900	4.63038	0.00116359	0.0472546	Up	AT1G04020	BARD1	BRCA1-associated RING domain protein 1	LOC_Os04g43300	BRCA1 C Terminus domain containing protein
TraesCS5B02G242000	4.61757	0.00125336	0.0495003	Up	AT1G71050	HIPP20	Heavy metal transport/detoxification superfamily protein	LOC_Os01g32330	heavy metal-associated domain containing protein
TraesCS7D02G291700	4.61656	1.98775e-11	6.2777e-08	Up				LOC_Os02g57760	O-methyltransferase
TraesCS6B02G248700	4.61586	0.000844441	0.0385578	Up	AT3G08010	ATAB2	RNA binding	LOC_Os02g39740	psaB translation factor
TraesCS2A02G291900	4.60673	0.000757236	0.0361983	Up	AT1G08250	ADT6	Arogenate dehydratase/prephenate dehydratase 6%2C chloroplastic	LOC_Os04g33390	prephenate dehydratase domain containing protein
TraesCS2D02G314600	4.60636	0.00095607	0.0418095	Up	AT1G44790		ChaC-like family protein	LOC_Os04g37580	cation transport regulator-like protein 1
TraesCS2D02G402500	4.59992	8.3699e-06	0.00182773	Up				LOC_Os04g47450	expressed protein
TraesCS7D02G341100	4.56259	0.00115173	0.0470354	Up	AT3G47570		Probable LRR receptor-like serine/threonine-protein kinase At3g47570	LOC_Os06g38590	receptor-like protein kinase precursor
TraesCS1B02G166000	4.55943	0.000158406	0.0132115	Up	AT1G04500		CCT motif family protein	LOC_Os10g32900	CCT motif family protein
TraesCS5A02G423600	4.54983	0.000513735	0.0281364	Up	AT2G34620		Mitochondrial transcription termination factor family protein	LOC_Os03g57149	mTERF domain containing protein
TraesCS3A02G183800	4.54268	0.000441308	0.0254952	Up	AT5G47560	TDT	Tonoplast dicarboxylate transporter	LOC_Os09g31130	citrate transporter
TraesCS5D02G039300	4.52834	0.000261235	0.0183773	Up	AT4G18370	DEGP5	Protease Do-like 5%2C chloroplastic	LOC_Os12g42210	OsDegp15 - Putative Deg protease homologue
TraesCS2A02G489000	4.52753	0.000962271	0.0419951	Up	AT1G55120	CWINV3	Beta-fructofuranosidase%2C insoluble isoenzyme CWINV3	LOC_Os09g08072	glycosyl hydrolases
TraesCS1D02G363800	4.51541	0.000783235	0.0368829	Up	AT5G63370	CDKG1	Cyclin-dependent kinase G1	LOC_Os12g23700	cyclin-dependent kinase G-2
TraesCS1B02G235800	4.50436	0.000664054	0.033219	Up	AT1G07090	LSH6	Protein LIGHT-DEPENDENT SHORT HYPOCOTYLS 6	LOC_Os05g28040	DUF640 domain containing protein
TraesCS3B02G549400	4.49202	1.43595e-05	0.00266791	Up	AT3G55850	LAF3	Amidohydrolase family	LOC_Os01g72350	amidohydrolase
TraesCS4B02G145000	4.476	0.00112644	0.046454	Up	AT5G56510	APUM12	Pumilio homolog 12	LOC_Os11g37090	pumilio-family RNA binding repeat domain containing protein
TraesCS2D02G191700	4.46822	0.000502507	0.0278099	Up	AT1G24625	ZFP7	Zinc finger protein 7	LOC_Os07g40300	ZOS7-10 - C2H2 zinc finger protein
TraesCS5A02G261700	4.46214	0.00103593	0.0439916	Up	AT1G58410	RXW24L	Probable disease resistance protein RXW24L	LOC_Os10g10360	NBS-LRR disease resistance protein
TraesCS2D02G205600	4.45028	1.23043e-05	0.0023743	Up	AT3G63170	FAP1	Fatty-acid-binding protein 1	LOC_Os07g38390	chalcone isomerase
TraesCS5A02G024300	4.43068	0.000236333	0.0173041	Up	AT5G17860	CCX1	Cation/calcium exchanger 1	LOC_Os12g42910	sodium/calcium exchanger protein
TraesCS7B02G285700	4.42845	0.000845304	0.0385669	Up	AT2G05790		O-Glycosyl hydrolases family 17 protein	LOC_Os07g35350	glucan endo-1
TraesCS7A02G567500	4.41691	7.02978e-06	0.00162054	Up	AT3G55350		PIF / Ping-Pong family of plant transposases	LOC_Os11g47780	pollen signalling protein with adenylyl cyclase activity
TraesCS5D02G487600	4.39317	0.000895656	0.0400849	Up				LOC_Os01g07300	uncharacterized 50.6 kDa protein in the 5region of gyrA and gyrB
TraesCS5D02G136700	4.37897	0.000100789	0.0098244	Up	AT3G52820	PAP22	Purple acid phosphatase 22	LOC_Os11g05400	Ser/Thr protein phosphatase family protein
TraesCS5D02G147000	4.35545	0.000772886	0.0365131	Up	AT3G62920		unknown protein%3B Has 25 Blast hits to 25 proteins in 11 species: Archae - 0%3B Bacteria - 0%3B Metazoa - 0%3B Fungi - 0%3B Plants - 25%3B Viruses - 0%3B Other Eukaryotes - 0 (source: NCBI BLink).	LOC_Os05g30810	expressed protein
TraesCS2B02G383500	4.32637	0.000917054	0.0406015	Up	AT4G13510	AMT1-1	Ammonium transporter 1 member 1	LOC_Os04g43070	ammonium transporter protein
TraesCS3D02G524000	4.29687	2.04537e-05	0.00333547	Up	AT5G40690		CONTAINS InterPro DOMAIN/s: EF-Hand 1%2C calcium-binding site (InterPro:IPR018247)%3B BEST Arabidopsis thaliana protein match is: unknown protein (TAIR:AT2G41730.1)%3B Has 1807 Blast hits to 1807 proteins in 277 species: Archae - 0%3B Bacteria - 0%3B Metazoa /.../ Fungi - 347%3B Plants - 385%3B Viruses - 0%3B Other Eukaryotes - 339 (source: NCBI BLink).	LOC_Os05g23130	expressed protein
TraesCS3B02G128600	4.26574	5.00188e-06	0.00125705	Up				LOC_Os12g03400	expressed protein
TraesCS6A02G240900	4.26181	0.00126714	0.0498987	Up	AT1G65730	YSL7	Probable metal-nicotianamine transporter YSL7	LOC_Os04g44330	transposon protein
TraesCS6A02G002000	4.25359	0.00121034	0.0485991	Up				LOC_Os02g01080	expressed protein
TraesCS4D02G330000	4.24191	0.000110255	0.0104777	Up	AT2G17705		unknown protein%3B FUNCTIONS IN: molecular_function unknown%3B INVOLVED IN: biological_process unknown%3B LOCATED IN: plasma membrane%3B EXPRESSED IN: cultured cell%3B BEST Arabidopsis thaliana protein match is: unknown protein (TAIR:AT4G08330.1)%3B Has 135 Bla /.../s to 135 proteins in 32 species: Archae - 5%3B Bacteria - 29%3B Metazoa - 0%3B Fungi - 0%3B Plants - 91%3B Viruses - 0%3B Other Euka…	LOC_Os03g04370	protein-methionine-S-oxide reductase
TraesCS2A02G222500	4.23937	7.73924e-06	0.00173348	Up	AT1G61930		Protein of unknown function%2C DUF584	LOC_Os07g33270	DUF584 domain containing protein
TraesCS1B02G359100	4.22352	4.34272e-05	0.0056441	Up	AT1G16800		P-loop containing nucleoside triphosphate hydrolases superfamily protein	LOC_Os03g32526	tRNA-splicing endonuclease positive effector-related
TraesCS2D02G492800	4.20898	1.53479e-05	0.00276455	Up	AT5G56550	OXS3	oxidative stress 3	LOC_Os02g13370	expressed protein
TraesCS3A02G243000	4.17033	0.000135962	0.0119387	Up	AT5G50890		alpha/beta-Hydrolases superfamily protein	LOC_Os01g47610	lipase class 3 family protein
TraesCS4B02G358700	4.15691	0.000281064	0.0192411	Up				LOC_Os10g25060	expressed protein
TraesCS6A02G093300	4.15597	8.39596e-08	5.72291e-05	Up	AT5G40450		unknown protein%3B FUNCTIONS IN: molecular_function unknown%3B INVOLVED IN: biological_process unknown%3B LOCATED IN: chloroplast%2C plasma membrane%3B EXPRESSED IN: 24 plant structures%3B EXPRESSED DURING: 13 growth stages%3B Has 30201 Blast hits to 17322 protei /.../780 species: Archae - 12%3B Bacteria - 1396%3B Metazoa - 17338%3B Fungi - 3422%3B Plants - 5037%3B Viruses - 0%3B Other Eukaryotes…	LOC_Os02g03840	expressed protein
TraesCS1A02G412200	4.15276	9.36356e-06	0.00197586	Up	AT2G27430		ARM repeat superfamily protein	LOC_Os05g49810	armadillo/beta-catenin-like repeat containing protein
TraesCS4B02G308400	4.15198	0.000862405	0.0391667	Up	AT2G20370	KAM1	Xyloglucan galactosyltransferase KATAMARI1	LOC_Os03g05070	exostosin family domain containing protein
TraesCS2B02G133500	4.14314	5.37397e-07	0.000235723	Up	AT5G64040	PSAN	Photosystem I reaction center subunit N%2C chloroplastic	LOC_Os12g08770	photosystem I reaction center subunit N
TraesCS4B02G161700	4.11409	7.52103e-07	0.000304525	Up	AT1G04910		Uncharacterized protein At1g04910	LOC_Os11g29120	growth regulator related protein
TraesCS4B02G158700	4.10323	0.000338642	0.0216644	Up	ATCG00220	PSBM	Photosystem II reaction center protein M
TraesCS2D02G307400	4.10021	0.000131163	0.0117127	Up	AT1G59740	NPF4.3	Protein NRT1/ PTR FAMILY 4.3	LOC_Os04g36040	peptide transporter PTR2
TraesCS3A02G365300	4.08237	1.09376e-05	0.00220019	Up	AT3G09220	LAC7	Laccase-7	LOC_Os01g63190	laccase precursor protein
TraesCS2A02G370000	4.06594	0.00042221	0.0247966	Up	AT3G61250	AtMYB17	myb domain protein 17	LOC_Os04g45060	MYB family transcription factor
TraesCS4B02G393500	4.06305	5.9523e-07	0.000257514	Up	AT4G15210	BAM5	Beta-amylase 5	LOC_Os07g35940	beta-amylase
TraesCS7D02G394700	4.05719	0.000566967	0.0298567	Up
TraesCS2D02G130300	4.0215	1.99544e-05	0.0032705	Up	AT2G31750	UGT74D1	UDP-glycosyltransferase 74D1	LOC_Os07g46610	cis-zeatin O-glucosyltransferase
TraesCS7B02G103500	3.98369	0.00121765	0.0486558	Up	AT3G48160	E2FE	E2F transcription factor-like E2FE	LOC_Os06g13670	E2F family transcription factor protein
TraesCS3D02G519400	3.97476	0.000131471	0.0117181	Up				LOC_Os07g36920	OsFBX255 - F-box domain containing protein
TraesCS3A02G228100	3.97113	1.43609e-05	0.00266791	Up	AT3G14690	CYP72A15	Cytochrome P450 72A15	LOC_Os01g43700	cytochrome P450 72A1
TraesCS5A02G170900	3.9498	0.00116225	0.0472409	Up				LOC_Os09g08550	OsFBX308 - F-box domain containing protein
TraesCS6A02G222000	3.94918	0.000221747	0.0166127	Up	AT2G02220	PSKR1	Phytosulfokine receptor 1	LOC_Os02g41890	phytosulfokine receptor precursor
TraesCS5A02G475600	3.94371	0.000218759	0.0164496	Up	AT3G55120	CHI1	Chalcone--flavonone isomerase 1	LOC_Os03g60509	expressed protein
TraesCS5D02G148900	3.94067	0.000687296	0.0340659	Up	AT5G53950	NAC098	Protein CUP-SHAPED COTYLEDON 2	LOC_Os12g03050	no apical meristem protein
TraesCSU02G199500	3.91422	0.000267656	0.0186055	Up	AT5G02810	APRR7	Two-component response regulator-like APRR7	LOC_Os07g49460	response regulator receiver domain containing protein
TraesCS1D02G231700	3.90348	5.55009e-11	1.25202e-07	Up	AT3G06880		Transducin/WD40 repeat-like superfamily protein	LOC_Os05g30010	WD domain
TraesCS3A02G154800	3.89721	0.00025062	0.0178805	Up	AT3G16175		Thioesterase superfamily protein	LOC_Os01g12920	thioesterase family protein
TraesCS5A02G242900	3.88497	0.00103634	0.0439916	Up	AT1G47480	CXE2	Probable carboxylesterase 2	LOC_Os09g28740	gibberellin receptor GID1L2
TraesCS3A02G437400	3.86933	0.000354394	0.0223551	Up	AT1G10370	GSTU17	Glutathione S-transferase U17	LOC_Os10g38710	glutathione S-transferase
TraesCS1B02G480200	3.8205	0.000461365	0.0262221	Up	AT3G54120	RTNLB12	Reticulon-like protein B12	LOC_Os04g29920	reticulon domain containing protein
TraesCS1A02G251200	3.80244	0.00108558	0.0454305	Up	AT1G54780	TLP18.3	UPF0603 protein At1g54780%2C chloroplastic	LOC_Os05g33280	thylakoid lumen protein
TraesCS7A02G160300	3.79778	7.27499e-06	0.00165691	Up	AT4G16410		unknown protein%3B CONTAINS InterPro DOMAIN/s: Protein of unknown function DUF751 (InterPro:IPR008470)%3B Has 30201 Blast hits to 17322 proteins in 780 species: Archae - 12%3B Bacteria - 1396%3B Metazoa - 17338%3B Fungi - 3422%3B Plants - 5037%3B Viruses - 0%3B Oth /.../aryotes - 2996 (source: NCBI BLink).	LOC_Os07g41630	expressed protein
TraesCS5A02G552600	3.7923	0.000339867	0.0217135	Up				LOC_Os03g01980	KIP1
TraesCS6D02G263700	3.75794	9.10742e-07	0.00034794	Up	AT5G10770		Eukaryotic aspartyl protease family protein	LOC_Os02g48860	aspartic proteinase nepenthesin-2 precursor
TraesCS4B02G290500	3.72854	4.83009e-05	0.00604534	Up				LOC_Os03g07870	expressed protein
TraesCS2A02G536500	3.72696	0.000223094	0.0166566	Up	AT4G21390	B120	G-type lectin S-receptor-like serine/threonine-protein kinase B120	LOC_Os04g53998	kinase
TraesCS2B02G332200	3.72594	0.000472224	0.0265843	Up	AT4G05460	SKIP19	F-box protein SKIP19	LOC_Os08g09450	OsFBL41 - F-box domain and LRR containing protein
TraesCS3B02G096600	3.68625	1.21601e-05	0.00235813	Up	AT2G29400	TOPP1	Serine/threonine-protein phosphatase PP1 isozyme 1	LOC_Os06g06880	Ser/Thr protein phosphatase family protein
TraesCS6A02G210000	3.66677	0.000264478	0.018491	Up	AT5G50200	NRT3.1	High-affinity nitrate transporter 3.1	LOC_Os04g40410	high affinity nitrate transporter
TraesCS7B02G117900	3.65719	0.000171356	0.0138452	Up	ATCG00170	RPOC2	DNA-directed RNA polymerase subunit beta''	LOC_Os08g05940	retrotransposon protein
TraesCS6A02G145100	3.6438	0.000202327	0.0156232	Up	AT2G12400		unknown protein%3B FUNCTIONS IN: molecular_function unknown%3B INVOLVED IN: biological_process unknown%3B LOCATED IN: endomembrane system%3B EXPRESSED IN: 25 plant structures%3B EXPRESSED DURING: 13 growth stages%3B BEST Arabidopsis thaliana protein match is: u /.../ protein (TAIR:AT2G25270.1)%3B Has 177 Blast hits to 172 proteins in 23 species: Archae - 0%3B Bacteria - 2%3B Metazoa - 3%3B Fungi …	LOC_Os02g09080	expressed protein
TraesCS6A02G076600	3.63562	0.000350811	0.0222213	Up				LOC_Os03g46510	OsFBX103 - F-box domain containing protein
TraesCS5A02G256900	3.59862	0.00095365	0.0417455	Up	AT1G55670	PSAG	Photosystem I reaction center subunit V%2C chloroplastic	LOC_Os09g30340	photosystem I reaction center subunit
TraesCS3A02G335500	3.59313	0.00120469	0.0484059	Up	AT4G29990		Leucine-rich repeat transmembrane protein kinase protein	LOC_Os01g59570	senescence-induced receptor-like serine/threonine-protein kinase precursor
TraesCS7D02G329400	3.54866	0.000760901	0.0362455	Up	AT1G30080		Glycosyl hydrolase superfamily protein	LOC_Os06g34020	glycosyl hydrolases family 17
TraesCS1B02G351900	3.50949	2.98249e-07	0.000152745	Up	AT5G58950		Protein kinase superfamily protein	LOC_Os05g44290	protein kinase domain containing protein
TraesCS2A02G098700	3.48742	0.000308167	0.0204895	Up	AT1G69790		Protein kinase superfamily protein	LOC_Os07g48730	tyrosine protein kinase domain containing protein
TraesCS3D02G203300	3.4411	3.86577e-07	0.000184058	Up				LOC_Os01g36220	bZIP transcription factor domain containing protein
TraesCS2B02G216900	3.40732	0.00105884	0.0446665	Up				LOC_Os10g34602	csAtPR5
TraesCS1B02G389100	3.38503	0.0012032	0.0483864	Up	AT5G60335		Thioesterase superfamily protein	LOC_Os05g09370	kinase
TraesCS4A02G446700	3.38406	7.9971e-05	0.0083723	Up	AT3G43190	SUS4	Sucrose synthase 4	LOC_Os03g28330	sucrose synthase
TraesCS1A02G364700	3.36953	1.46019e-05	0.00269683	Up	AT1G15400		Uncharacterized protein At1g15400	LOC_Os05g46500	expressed protein
TraesCS5A02G149300	3.34688	2.46992e-05	0.00375024	Up	AT2G38420		Pentatricopeptide repeat-containing protein At2g38420%2C mitochondrial	LOC_Os02g35750	pentatricopeptide repeat domain containing protein
TraesCS4A02G494200	3.34485	0.00106045	0.0447146	Up	AT3G46730	RPP13L3	Putative disease resistance RPP13-like protein 3	LOC_Os11g46210	NB-ARC domain containing protein
TraesCS4B02G308500	3.34163	0.000625624	0.0319824	Up	AT2G20370	KAM1	Xyloglucan galactosyltransferase KATAMARI1	LOC_Os03g05060	exostosin family domain containing protein
TraesCS5A02G343000	3.33003	0.000129886	0.0116722	Up	AT4G20780	CML42	Calcium-binding protein CML42	LOC_Os05g24780	OsCML21 - Calmodulin-related calcium sensor protein
TraesCS1D02G037300	3.32088	0.000139727	0.0121566	Up	AT3G46430		unknown protein%3B FUNCTIONS IN: molecular_function unknown%3B INVOLVED IN: biological_process unknown%3B LOCATED IN: mitochondrion%2C mitochondrial respiratory chain complex III%3B EXPRESSED IN: 25 plant structures%3B EXPRESSED DURING: 15 growth stages%3B BEST A /.../psis thaliana protein match is: unknown protein (TAIR:AT5G59613.2)%3B Has 51 Blast hits to 51 proteins in 16 species: Archae - 0%3…	LOC_Os03g40920	expressed protein
TraesCS5B02G510500	3.30526	0.000753536	0.0361125	Up				LOC_Os12g40080	B3 DNA binding domain containing protein
TraesCS3A02G390200	3.28811	2.84671e-05	0.00415585	Up	AT2G23140	PUB4	U-box domain-containing protein 4	LOC_Os08g01900	armadillo/beta-catenin repeat family protein
TraesCS5A02G492300	3.28252	0.000545062	0.029226	Up	AT4G20960	PYRD	Riboflavin biosynthesis protein PYRD%2C chloroplastic	LOC_Os03g02600	riboflavin biosynthesis protein ribD
TraesCS1A02G157900	3.2808	1.55868e-05	0.00278115	Up	AT5G03230		Protein of unknown function%2C DUF584	LOC_Os10g33990	DUF584 domain containing protein
TraesCS3D02G036000	3.2787	6.38432e-05	0.00727905	Up	AT4G00970	CRK41	Cysteine-rich receptor-like protein kinase 41	LOC_Os02g48080	cysteine-rich receptor-like protein kinase 7 precursor
TraesCS7A02G078200	3.26401	0.000218531	0.0164456	Up	AT4G10730		Protein kinase superfamily protein	LOC_Os03g02320	STE_PAK_Ste20_STLK.3 - STE kinases include homologs to sterile 7
TraesCS4A02G323800	3.25886	0.00105717	0.0446325	Up	AT3G02910		Putative gamma-glutamylcyclotransferase At3g02910	LOC_Os03g63700	AIG2-like family domain containing protein
TraesCS7B02G042100	3.22127	0.000896234	0.0400919	Up	AT5G20400		2-oxoglutarate (2OG) and Fe(II)-dependent oxygenase superfamily protein	LOC_Os06g07932	flavonol synthase/flavanone 3-hydroxylase
TraesCS7D02G229400	3.1929	2.31689e-05	0.00359863	Up				LOC_Os06g22390	expressed protein
TraesCS2D02G383100	3.1909	0.000114858	0.0107639	Up				LOC_Os11g26990	expressed protein
TraesCS2D02G173200	3.16595	0.000970572	0.0422212	Up	AT5G66840		SAP domain-containing protein	LOC_Os07g42760	expressed protein
TraesCS5A02G062600	3.1138	7.51288e-05	0.0080388	Up	AT2G23450	WAKL14	Wall-associated receptor kinase-like 14	LOC_Os12g40419	protein kinase domain containing protein
TraesCS1B02G194400	3.10928	0.000540034	0.0291213	Up	AT1G10360	GSTU18	Glutathione S-transferase U18	LOC_Os10g38489	glutathione S-transferase GSTU6
TraesCS1A02G048300	3.09431	0.00013194	0.0117489	Up	AT3G22980		Ribosomal protein S5/Elongation factor G/III/V family protein	LOC_Os03g44780	elongation factor Tu family protein
TraesCS7B02G461800	3.092	0.000367381	0.0228999	Up	AT5G13700	PAO1	Polyamine oxidase 1	LOC_Os09g20284	amine oxidase
TraesCS5A02G440800	3.02803	5.06691e-05	0.00622547	Up	AT4G02610	TRPA1	Tryptophan synthase alpha chain	LOC_Os03g58320	indole-3-glycerol phosphate lyase
TraesCS1D02G151600	3.01642	0.000323524	0.0211397	Up	AT4G02890	UBQ14	Polyubiquitin 11	LOC_Os10g33620	ubiquitin family protein
TraesCS7B02G373700	2.99874	0.00126682	0.0498987	Up	AT3G06190	BPM2	BTB/POZ and MATH domain-containing protein 2	LOC_Os06g14060	MBTB10 - Bric-a-Brac
TraesCS3A02G390000	2.9846	0.00110936	0.0460797	Up	AT5G07610		F-box protein At5g07610	LOC_Os01g65510	OsFBX31 - F-box domain containing protein
TraesCS6A02G184000	2.97128	0.00011055	0.0104952	Up	AT3G47110		Putative receptor-like protein kinase At3g47110	LOC_Os02g12400	receptor-like protein kinase precursor
TraesCS4A02G495100	2.95786	2.58157e-07	0.000137757	Up	AT4G15370	BARS1	Baruol synthase	LOC_Os11g08569	cycloartenol synthase
TraesCSU02G165700	2.94276	1.46475e-07	9.01823e-05	Up				LOC_Os02g15160	OsFBX40 - F-box domain containing protein
TraesCS7B02G072300	2.90144	0.000491041	0.027335	Up	AT5G06700	TBR	Protein trichome birefringence	LOC_Os06g10560	leaf senescence related protein
TraesCS5A02G343500	2.88725	7.00202e-05	0.00771219	Up	AT1G29430	SAUR62	Auxin-responsive protein SAUR62	LOC_Os09g37350	OsSAUR40 - Auxin-responsive SAUR gene family member
TraesCS1D02G312500	2.88337	8.34263e-05	0.00861974	Up	AT4G29900	ACA10	Calcium-transporting ATPase 10%2C plasma membrane-type	LOC_Os05g41580	calcium-transporting ATPase
TraesCS6A02G376200	2.85088	2.06652e-05	0.00336416	Up	AT1G21270	WAK2	Wall-associated receptor kinase 2	LOC_Os02g56630	OsWAK24 - OsWAK receptor-like protein kinase
TraesCS5A02G032500	2.84915	0.000209554	0.0160116	Up	AT1G72250		Di-glucose binding protein with Kinesin motor domain	LOC_Os12g42160	kinesin motor domain containing protein
TraesCS2D02G596400	2.80224	0.000161062	0.0133743	Up	AT2G35980	YLS9	Protein YLS9	LOC_Os04g58850	harpin-induced protein 1 domain containing protein
TraesCS1B02G396000	2.77021	0.000381949	0.0234382	Up	AT3G22830	HSFA6B	Heat stress transcription factor A-6b	LOC_Os10g28340	heat stress transcription factor
TraesCS5A02G514800	2.75989	0.000326697	0.0212897	Up	AT2G40095		Alpha/beta hydrolase related protein	LOC_Os03g03200	hydrolase
TraesCS3B02G116400	2.73091	5.27053e-05	0.00640207	Up	AT2G23010	SCPL9	Serine carboxypeptidase-like 9	LOC_Os10g01110	OsSCP44 - Putative Serine Carboxypeptidase homologue
TraesCS6D02G127800	2.7277	0.000664058	0.033219	Up	AT1G10370	GSTU17	Glutathione S-transferase U17	LOC_Os10g38670	glutathione S-transferase
TraesCS2B02G512400	2.68597	0.00090522	0.0403225	Up	AT4G21380	SD18	Receptor-like serine/threonine-protein kinase SD1-8	LOC_Os04g54070	receptor-like kinase
TraesCS6B02G200000	2.67904	3.53138e-05	0.00485608	Up	AT5G57850	DAAT	D-amino-acid transaminase%2C chloroplastic	LOC_Os02g17330	aminotransferase domain containing protein
TraesCS2B02G446100	2.6622	0.00102247	0.0436177	Up	AT2G14720	VSR4	Vacuolar-sorting receptor 4	LOC_Os10g20630	vacuolar-sorting receptor precursor
TraesCS2A02G069100	2.65835	0.000882338	0.0396952	Up	AT5G20480	EFR	LRR receptor-like serine/threonine-protein kinase EFR	LOC_Os06g38760	retrotransposon protein
TraesCS3A02G279600	2.65079	8.58025e-05	0.00881718	Up	AT3G16520	UGT88A1	UDP-glycosyltransferase 88A1	LOC_Os01g53420	anthocyanidin 5
TraesCS2D02G207600	2.64132	0.000114495	0.0107512	Up	AT1G04940	TIC20-I	Protein TIC 20-I%2C chloroplastic	LOC_Os07g38110	tic20
TraesCS2D02G456800	2.63974	0.00126265	0.0498149	Up	AT5G06740	LECRKS5	Probable L-type lectin-domain containing receptor kinase S.5	LOC_Os04g49480	legume lectins beta domain containing protein
TraesCS6D02G261400	2.60499	0.000556066	0.0295485	Up	AT4G12070		unknown protein%3B INVOLVED IN: biological_process unknown%3B LOCATED IN: plasma membrane%3B EXPRESSED IN: 22 plant structures%3B EXPRESSED DURING: 13 growth stages%3B Has 30201 Blast hits to 17322 proteins in 780 species: Archae - 12%3B Bacteria - 1396%3B Metazo /.../338%3B Fungi - 3422%3B Plants - 5037%3B Viruses - 0%3B Other Eukaryotes - 2996 (source: NCBI BLink).	LOC_Os02g48640	expressed protein
TraesCS4B02G027900	2.57454	1.61284e-05	0.00285094	Up	AT5G04500		Glycosyltransferase family protein 64 protein C5	LOC_Os03g48010	exostosin
TraesCS7A02G413200	2.56973	1.1914e-05	0.00233837	Up	AT2G02040	NPF8.3	Protein NRT1/ PTR FAMILY 8.3	LOC_Os06g49220	peptide transporter
TraesCS7B02G186100	2.5483	0.000239497	0.0174444	Up				LOC_Os04g30300	retrotransposon protein
TraesCS3B02G239800	2.52916	0.000667765	0.0333692	Up	AT1G72790		hydroxyproline-rich glycoprotein family protein	LOC_Os01g40190	retrotransposon protein
TraesCS2A02G287200	2.51353	0.000178696	0.0142966	Up	AT1G71050	HIPP20	Heavy metal transport/detoxification superfamily protein	LOC_Os01g32330	heavy metal-associated domain containing protein
TraesCS4B02G305400	2.50741	6.25892e-07	0.00026598	Up				LOC_Os03g08970	expressed protein
TraesCS1D02G395200	2.47641	0.00121519	0.0486088	Up	AT3G12700		Eukaryotic aspartyl protease family protein	LOC_Os05g48330	aspartyl protease family protein
TraesCS6D02G095800	2.47109	0.00111787	0.0462911	Up	AT1G69740	HEMB1	Delta-aminolevulinic acid dehydratase 1%2C chloroplastic	LOC_Os06g49110	delta-aminolevulinic acid dehydratase
TraesCS3A02G157300	2.4537	0.000381954	0.0234382	Up	AT2G33770	UBC24	Probable ubiquitin-conjugating enzyme E2 24	LOC_Os01g13280	ubiquitin conjugating enzyme protein
TraesCS4A02G357400	2.40389	3.01736e-05	0.00429898	Up				LOC_Os03g61900	expressed protein
TraesCS3A02G287400	2.3919	1.3053e-05	0.00247839	Up	AT5G56760	SAT5	Serine acetyltransferase 5	LOC_Os01g52260	serine acetyltransferase protein
TraesCS3B02G563200	2.37181	0.000211214	0.0160766	Up	AT3G21690		MATE efflux family protein	LOC_Os03g37640	MATE efflux family protein
TraesCS2B02G048600	2.35021	0.000702062	0.0345187	Up	AT5G67150		HXXXD-type acyl-transferase family protein	LOC_Os08g01980	transferase family protein
TraesCS3A02G173500	2.34918	5.18437e-05	0.0063136	Up	AT3G66654	CYP21-4	Peptidyl-prolyl cis-trans isomerase CYP21-4	LOC_Os01g15029	expressed protein
TraesCSU02G106400	2.33728	0.000411667	0.0244691	Up	AT1G13080	CYP71B2	Cytochrome P450 71B2	LOC_Os06g30500	cytochrome P450
TraesCS3B02G144800	2.28312	8.83647e-05	0.00898305	Up	AT2G36780	UGT73C3	UDP-glycosyltransferase 73C3	LOC_Os01g08110	flavonol-3-O-glycoside-7-O-glucosyltransferase 1
TraesCS7A02G315900	2.19336	0.000439584	0.0254421	Up	AT5G01420		Glutaredoxin family protein	LOC_Os03g44650	glutaredoxin
TraesCS7A02G440800	2.18873	0.00081773	0.0378325	Up	AT5G18160		F-box protein At5g18160	LOC_Os04g11790	OsFBX120 - F-box domain containing protein
TraesCS1D02G223000	2.18548	0.000707915	0.0346984	Up	AT4G16640		Matrixin family protein	LOC_Os10g40830	metalloendoproteinase 1 precursor
TraesCS7D02G377500	2.13955	0.000713731	0.0348753	Up	AT5G14420	RGLG2	E3 ubiquitin-protein ligase RGLG2	LOC_Os06g40650	copine-1
TraesCS2A02G225300	2.09449	0.000214661	0.0162706	Up	AT1G75460		ATP-dependent protease La (LON) domain protein	LOC_Os07g32560	ATP-dependent protease
TraesCS7D02G352400	2.07453	0.00064478	0.0327036	Up	AT1G80440		F-box/kelch-repeat protein At1g80440	LOC_Os06g39370	OsFBK16 - F-box domain and kelch repeat containing protein
TraesCS3D02G218900	2.02759	3.41581e-05	0.00473149	Up
TraesCS1A02G395100	1.95684	0.000104324	0.0100963	Up	AT2G30750	CYP71A12	cytochrome P450%2C family 71%2C subfamily A%2C polypeptide 12	LOC_Os06g43384	cytochrome P450
TraesCS2D02G351100	1.94046	0.000331934	0.0214672	Up	AT1G65540		LETM1-like protein	LOC_Os04g41950	calcium-binding mitochondrial protein anon-60Da
TraesCS3B02G474500	1.93302	0.000432964	0.025213	Up	AT1G21230	WAK5	Wall-associated receptor kinase 5	LOC_Os02g42150	OsWAK14 - OsWAK receptor-like protein kinase
TraesCS3A02G478900	1.923	6.44098e-05	0.00730847	Up	AT1G50180		Putative disease resistance protein At1g50180	LOC_Os10g03570	RGH1A
TraesCS3B02G426900	1.91402	0.000558193	0.029627	Up	AT1G05805	BHLH128	Transcription factor bHLH128	LOC_Os01g67480	helix-loop-helix DNA-binding domain containing protein
TraesCS6B02G075400	1.87465	3.21172e-05	0.0045091	Up				LOC_Os02g15160	OsFBX40 - F-box domain containing protein
TraesCS7A02G046300	1.80563	0.000157082	0.0131731	Up	AT3G07040	RPM1	Disease resistance protein RPM1	LOC_Os10g21400	disease resistance protein RPM1
TraesCS6B02G247000	1.73815	0.000550748	0.0293648	Up	AT3G26380		Melibiase family protein	LOC_Os01g33420	glycosyl hydrolase family protein 27
TraesCS4A02G228600	1.73479	0.000353832	0.0223345	Up	AT2G44130		F-box/kelch-repeat protein At2g44130	LOC_Os11g14140	OsFBK25 - F-box domain and kelch repeat containing protein
TraesCS7D02G126300	1.71916	0.000362811	0.0227648	Up	AT5G67140		F-box protein At5g67140	LOC_Os06g07000	OsFBL28 - F-box domain and LRR containing protein
TraesCS1D02G301400	1.69272	7.91187e-05	0.00830146	Up	AT5G58300		Probable inactive receptor kinase At5g58300	LOC_Os07g48310	inactive receptor kinase At2g26730 precursor
TraesCS1B02G475800	1.65361	0.000120855	0.0111603	Up	AT5G12010		unknown protein%3B INVOLVED IN: response to salt stress%3B LOCATED IN: chloroplast%2C plasma membrane%2C membrane%3B EXPRESSED IN: 23 plant structures%3B EXPRESSED DURING: 13 growth stages%3B BEST Arabidopsis thaliana protein match is: unknown protein (TAIR:AT4G2 /.../)%3B Has 1807 Blast hits to 1807 proteins in 277 species: Archae - 0%3B Bacteria - 0%3B Metazoa - 736%3B Fungi - 347%3B Plants - 3…	LOC_Os01g40070	expressed protein
TraesCS5B02G413900	1.62612	0.000169473	0.0137511	Up	AT5G42710		unknown protein%3B Has 1807 Blast hits to 1807 proteins in 277 species: Archae - 0%3B Bacteria - 0%3B Metazoa - 736%3B Fungi - 347%3B Plants - 385%3B Viruses - 0%3B Other Eukaryotes - 339 (source: NCBI BLink).	LOC_Os03g56430	expressed protein
TraesCS7D02G533700	1.62567	0.00110548	0.0459789	Up
TraesCS3B02G353800	1.58923	0.000571537	0.0299839	Up	AT4G21250		Sulfite exporter TauE/SafE family protein	LOC_Os01g57710	membrane protein
TraesCS4B02G005000	1.55396	0.000124334	0.011338	Up	AT3G14470	RPPL1	Putative disease resistance RPP13-like protein 1	LOC_Os11g47780	pollen signalling protein with adenylyl cyclase activity
TraesCS3A02G048700	1.48018	1.08741e-05	0.00219208	Up	AT1G18390		Probable serine/threonine-protein kinase At1g18390	LOC_Os01g04409	OsWAK1 - OsWAK receptor-like cytoplasmic kinase OsWAK-RLCK
TraesCS5D02G229500	1.45644	0.000657419	0.0330748	Up	AT2G24860		DnaJ/Hsp40 cysteine-rich domain superfamily protein	LOC_Os09g25590	tsi1-interacting protein TSIP1
TraesCS5D02G506500	1.4536	0.00020694	0.0158503	Up				LOC_Os07g23900	OsFBX234 - F-box domain containing protein
TraesCS1D02G047300	1.44271	0.000922749	0.0407523	Up	AT5G19160	TBL11	Protein trichome birefringence-like 11	LOC_Os11g05080	powdery mildew resistant protein 5
TraesCS3B02G475400	1.42964	0.00117331	0.0474463	Up	AT2G35730		Heavy metal transport/detoxification superfamily protein	LOC_Os01g70240	expressed protein
TraesCS2D02G210000	1.39215	5.65642e-05	0.00669904	Up	AT2G20890	THF1	Protein THYLAKOID FORMATION 1%2C chloroplastic	LOC_Os07g37250	THYLAKOID FORMATION1
TraesCS4B02G212000	1.39158	8.94141e-05	0.00904001	Up	AT5G55390	EDM2	Protein ENHANCED DOWNY MILDEW 2	LOC_Os03g15990	EDM2
TraesCS1A02G413700	1.38427	0.00036454	0.0228129	Up	AT5G64440	FAAH	Fatty acid amide hydrolase	LOC_Os12g07150	amidase family protein
TraesCS6A02G116700	1.3691	0.000259153	0.0182964	Up	AT3G57062		unknown protein%3B FUNCTIONS IN: molecular_function unknown%3B INVOLVED IN: biological_process unknown%3B LOCATED IN: endomembrane system%3B Has 30201 Blast hits to 17322 proteins in 780 species: Archae - 12%3B Bacteria - 1396%3B Metazoa - 17338%3B Fungi - 3422%3B /.../ - 5037%3B Viruses - 0%3B Other Eukaryotes - 2996 (source: NCBI BLink).
TraesCS5A02G103000	1.33918	0.000570899	0.0299836	Up	AT3G12350		F-box protein At3g12350	LOC_Os12g32630	OsFBX448 - F-box domain containing protein
TraesCS2B02G441000	1.32601	0.000438401	0.0254182	Up	AT3G12800	SDRB	Peroxisomal 2%2C4-dienoyl-CoA reductase	LOC_Os04g52400	oxidoreductase
TraesCS7A02G229600	1.3205	0.000715382	0.0349379	Up	AT4G23180	CRK10	Cysteine-rich receptor-like protein kinase 10	LOC_Os06g30130	cysteine-rich receptor-like protein kinase 10 precursor
TraesCS2A02G183700	1.30859	0.000453597	0.0259207	Up	AT4G33925		unknown protein%3B Has 30201 Blast hits to 17322 proteins in 780 species: Archae - 12%3B Bacteria - 1396%3B Metazoa - 17338%3B Fungi - 3422%3B Plants - 5037%3B Viruses - 0%3B Other Eukaryotes - 2996 (source: NCBI BLink).	LOC_Os07g40300	ZOS7-10 - C2H2 zinc finger protein
TraesCS6D02G312800	1.28272	0.00112671	0.046454	Up	AT3G19290	ABF4	ABSCISIC ACID-INSENSITIVE 5-like protein 7	LOC_Os02g52780	bZIP transcription factor
TraesCS1B02G229400	1.27399	0.00127042	0.0499401	Up	AT1G10940	SRK2A	Serine/threonine-protein kinase SRK2A	LOC_Os10g41490	CAMK_CAMK_like.41 - CAMK includes calcium/calmodulin depedent protein kinases
TraesCS1B02G439800	1.2509	6.54474e-05	0.0073908	Up	AT4G01120	GBF2	G-box-binding factor 2	LOC_Os05g49420	transcription factor
TraesCS1B02G187600	1.21525	8.44537e-06	0.00183946	Up	AT3G47160		RING/U-box superfamily protein	LOC_Os10g35670	zinc finger
TraesCS5D02G112200	1.1837	3.58401e-06	0.000992895	Up	AT1G80570	FBL14	F-box/LRR-repeat protein 14	LOC_Os12g33220	F-box/LRR-repeat protein 14
TraesCS6A02G360000	1.1597	0.00112825	0.0464568	Up	AT4G31020		alpha/beta-Hydrolases superfamily protein	LOC_Os02g55330	OsPOP6 - Putative Prolyl Oligopeptidase homologue
TraesCS6D02G278300	1.15876	0.00120098	0.0483178	Up	AT5G18200		ADP-glucose phosphorylase	LOC_Os07g07550	galactose-1-phosphate uridyl transferase
TraesCS2D02G467800	1.1472	0.000366013	0.0228598	Up	AT2G43640	SRP14	Signal recognition particle 14 kDa protein	LOC_Os04g53220	signal recognition particle 14 kDa protein
TraesCS2A02G355000	1.13716	0.00044315	0.0255549	Up	AT5G10810	ATER	Enhancer of rudimentary homolog	LOC_Os02g39830	enhancer of rudimentary protein
TraesCS7D02G107600	1.10427	4.27052e-05	0.00557377	Up	AT2G33990	iqd9	IQ-domain 9	LOC_Os06g06160	IQ calmodulin-binding motif domain containing protein
TraesCS4B02G141600	1.1007	1.05532e-05	0.00214565	Up	AT2G29050	ATRBL1	RHOMBOID-like 1	LOC_Os11g47840	OsRhmbd18 - Putative Rhomboid homologue
TraesCS6A02G026300	1.07576	0.00083279	0.0381719	Up	AT3G45090		P-loop NTPase domain-containing protein LPA1 homolog 2	LOC_Os09g39870	2-phosphoglycerate kinase-related
TraesCS5B02G060500	1.07257	0.000138971	0.0121131	Up	AT1G27040	NPF4.5	Protein NRT1/ PTR FAMILY 4.5	LOC_Os04g41450	TGF-beta receptor
TraesCS4B02G110800	1.0586	0.000838726	0.0383708	Up	AT5G64090		FUNCTIONS IN: molecular_function unknown%3B INVOLVED IN: biological_process unknown%3B LOCATED IN: plasma membrane%3B EXPRESSED IN: 23 plant structures%3B EXPRESSED DURING: 13 growth stages%3B CONTAINS InterPro DOMAIN/s: Hyccin (InterPro:IPR018619)%3B BEST Arab /.../s thaliana protein match is: unknown protein (TAIR:AT5G21050.1)%3B Has 1807 Blast hits to 1807 proteins in 277 species: Archae - 0%3…	LOC_Os11g06860	expressed protein
TraesCS2A02G421400	1.05418	0.000263662	0.0184907	Up	AT3G22200	POP2	Gamma-aminobutyrate transaminase POP2%2C mitochondrial	LOC_Os08g10510	aminotransferase
TraesCS5D02G101100	1.04499	0.000778593	0.0367008	Up	AT1G56345		RNA pseudouridine synthase 1	LOC_Os12g37380	RNA pseudouridine synthase
TraesCS7D02G508800	1.04246	0.000822151	0.0378501	Up	AT1G10170	NFXL1	NF-X1-type zinc finger protein NFXL1	LOC_Os06g14190	NF-X1-type zinc finger protein
TraesCS5A02G123900	1.03134	0.00031144	0.0206204	Up	AT2G21195		unknown protein%3B Has 28 Blast hits to 28 proteins in 11 species: Archae - 0%3B Bacteria - 0%3B Metazoa - 0%3B Fungi - 0%3B Plants - 28%3B Viruses - 0%3B Other Eukaryotes - 0 (source: NCBI BLink).	LOC_Os07g16150	expressed protein
TraesCS7B02G137700	1.01047	0.00112217	0.046408	Up	AT3G20260		Protein of unknown function (DUF1666)	LOC_Os08g40820	expressed protein
TraesCS3D02G440400	1.00742	0.000174815	0.0140483	Up	AT3G07040	RPM1	Disease resistance protein RPM1	LOC_Os04g14220	disease resistance protein RPM1
TraesCS2A02G284900	1.00016	0.000560636	0.0296801	Up	AT3G27020	YSL6	Probable metal-nicotianamine transporter YSL6	LOC_Os04g32060	transposon protein
TraesCS1A02G190000	-1.00087	0.000445601	0.0256237	Down	AT4G10650	DGP2	DAR GTPase 2%2C mitochondrial	LOC_Os10g42170	GTPase of unknown function domain containing protein
TraesCS7A02G145700	-1.00357	0.000174411	0.0140278	Down	AT4G31985	RPL39C	60S ribosomal protein L39-1	LOC_Os02g55370	60S ribosomal protein L39
TraesCS1D02G340400	-1.01322	6.11113e-05	0.00708697	Down	AT1G06410	TPS7	Probable alpha%2Calpha-trehalose-phosphate synthase	LOC_Os02g54820	trehalose-6-phosphate synthase
TraesCS1D02G161900	-1.01882	0.000130281	0.0116722	Down	AT5G08370	AGAL2	Alpha-galactosidase 2	LOC_Os10g35110	alpha-galactosidase precursor
TraesCS3B02G158400	-1.03949	0.000997397	0.0429543	Down	AT3G49910	RPL26A	60S ribosomal protein L26-1	LOC_Os01g04730	ribosomal protein L24
TraesCS7A02G008900	-1.0409	4.27095e-05	0.00557377	Down	AT4G12420	SKU5	Monocopper oxidase-like protein SKU5	LOC_Os06g01490	monocopper oxidase
TraesCS7B02G135900	-1.04674	0.00123138	0.0489996	Down	AT4G34050	CCOAOMT1	Caffeoyl-CoA O-methyltransferase 1	LOC_Os08g38900	caffeoyl-CoA O-methyltransferase
TraesCS4B02G204400	-1.0476	0.001004	0.0431013	Down	AT2G28720		Histone H2B.3	LOC_Os08g38300	Core histone H2A/H2B/H3/H4 domain containing protein
TraesCSU02G105800	-1.05614	0.000772108	0.0365131	Down	AT4G38270	GAUT3	Probable galacturonosyltransferase 3	LOC_Os10g21890	glycosyl transferase family 8
TraesCS6A02G356500	-1.07101	0.000872988	0.0394431	Down	AT4G30610	SCPL24	Serine carboxypeptidase 24	LOC_Os02g55130	OsSCP10 - Putative Serine Carboxypeptidase homologue
TraesCS7B02G221800	-1.07752	0.00079882	0.0372649	Down	AT4G10170		SNARE-like superfamily protein	LOC_Os08g01880	synaptobrevin-related family protein
TraesCS5B02G290300	-1.07798	0.000534913	0.0289669	Down	AT1G30620	MUR4	UDP-arabinose 4-epimerase 1	LOC_Os07g04690	UDP-arabinose 4-epimerase 1
TraesCS7B02G294800	-1.09146	7.89605e-05	0.00830146	Down	AT5G38530	TSBtype2	tryptophan synthase beta type 2	LOC_Os06g42560	tryptophan synthase beta chain 2
TraesCS2D02G237200	-1.1074	0.000131399	0.0117181	Down	AT4G25120	SRS2	P-loop containing nucleoside triphosphate hydrolases superfamily protein	LOC_Os07g30980	uvrD/REP helicase family protein
TraesCS1B02G209300	-1.11409	0.0010781	0.0452373	Down	AT5G52980		CONTAINS InterPro DOMAIN/s: ATPase%2C vacuolar ER assembly factor%2C Vma12 (InterPro:IPR021013)%3B Has 1807 Blast hits to 1807 proteins in 277 species: Archae - 0%3B Bacteria - 0%3B Metazoa - 736%3B Fungi - 347%3B Plants - 385%3B Viruses - 0%3B Other Eukaryotes - 339 /.../ce: NCBI BLink).	LOC_Os02g13200	expressed protein
TraesCS5A02G394900	-1.1225	0.000121102	0.0111723	Down	AT5G15490	UGD3	UDP-glucose 6-dehydrogenase 3	LOC_Os12g25690	UDP-glucose 6-dehydrogenase
TraesCS3D02G438800	-1.13316	4.76968e-05	0.00598554	Down	AT4G12910	SCPL20	Serine carboxypeptidase-like 20	LOC_Os12g15470	OsSCP65 - Putative Serine Carboxypeptidase homologue
TraesCS6A02G076300	-1.14689	0.000220564	0.0165576	Down	AT4G16450		unknown protein%3B FUNCTIONS IN: molecular_function unknown%3B INVOLVED IN: photorespiration%3B LOCATED IN: mitochondrion%2C mitochondrial membrane%2C mitochondrial respiratory chain complex I%2C respiratory chain complex I%2C membrane%3B EXPRESSED IN: 25 plant str /.../s%3B EXPRESSED DURING: 15 growth stages%3B Has 30201 Blast hits to 17322 proteins in 780 species: Archae - 12%3B Bacteria - 1396…	LOC_Os08g33460	expressed protein
TraesCS7D02G130500	-1.14746	0.000480479	0.0268893	Down	AT2G21790	RNR1	Ribonucleoside-diphosphate reductase large subunit	LOC_Os06g07210	ribonucleoside-diphosphate reductase large subunit
TraesCS3A02G136100	-1.14751	5.16671e-05	0.00630491	Down	AT2G30490	CYP73A5	Trans-cinnamate 4-monooxygenase	LOC_Os05g25640	cytochrome P450
TraesCS7D02G315500	-1.15979	7.03682e-05	0.00773283	Down	AT4G10260		Probable fructokinase-5	LOC_Os08g02120	kinase
TraesCS3A02G056400	-1.18306	9.87729e-05	0.0096777	Down	AT5G01180	NPF8.2	Protein NRT1/ PTR FAMILY 8.2	LOC_Os03g51050	peptide transporter PTR2
TraesCS2D02G201200	-1.19236	0.000983964	0.0425887	Down	AT2G44260		Plant protein of unknown function (DUF946)	LOC_Os07g38840	expressed protein
TraesCS2A02G397200	-1.19905	0.000184414	0.0146581	Down	AT4G36180		Probable LRR receptor-like serine/threonine-protein kinase At4g36180	LOC_Os04g48760	leucine-rich repeat family protein
TraesCS4D02G026800	-1.20512	1.81902e-05	0.00306663	Down	AT5G62680	NPF2.11	Protein NRT1/ PTR FAMILY 2.11	LOC_Os03g48180	peptide transporter PTR2
TraesCS6D02G338700	-1.21631	0.0001899	0.0149276	Down	AT4G30610	SCPL24	Serine carboxypeptidase 24	LOC_Os02g55130	OsSCP10 - Putative Serine Carboxypeptidase homologue
TraesCS7A02G092700	-1.22514	0.00122231	0.0487822	Down	AT5G25940		early nodulin-related	LOC_Os06g04950	early nodulin 93 ENOD93 protein
TraesCS5D02G404300	-1.2414	1.23869e-05	0.00238026	Down	AT5G15490	UGD3	UDP-glucose 6-dehydrogenase 3	LOC_Os12g25690	UDP-glucose 6-dehydrogenase
TraesCS3A02G374500	-1.24172	0.000806246	0.0374821	Down	AT3G52610		unknown protein%3B Has 68 Blast hits to 67 proteins in 21 species: Archae - 0%3B Bacteria - 11%3B Metazoa - 0%3B Fungi - 0%3B Plants - 55%3B Viruses - 0%3B Other Eukaryotes - 2 (source: NCBI BLink).	LOC_Os01g64256	transposon protein
TraesCS4B02G197900	-1.2443	2.63379e-05	0.00390518	Down	AT1G07890	APX1	L-ascorbate peroxidase 1%2C cytosolic	LOC_Os03g17690	OsAPx1 - Cytosolic Ascorbate Peroxidase encoding gene 1-8
TraesCS2B02G171900	-1.2451	6.19725e-06	0.00145338	Down	AT1G46264	HSFB4	Heat stress transcription factor B-4	LOC_Os07g44690	HSF-type DNA-binding domain containing protein
TraesCS5A02G019700	-1.24859	1.44848e-05	0.00268042	Down	AT1G13680		PLC-like phosphodiesterases superfamily protein	LOC_Os03g30130	phospholipase C
TraesCS7D02G542800	-1.25325	0.000154619	0.013045	Down	AT3G09920	PIP5K9	Phosphatidylinositol 4-phosphate 5-kinase 9	LOC_Os02g57660	phosphatidylinositol-4-phosphate 5-kinase
TraesCS6B02G286300	-1.27857	1.48188e-05	0.00271047	Down	AT1G12250		Thylakoid lumenal protein At1g12250%2C chloroplastic	LOC_Os02g42960	thylakoid lumenal protein
TraesCS2B02G568200	-1.28377	0.000405104	0.024416	Down	AT5G07010	SOT15	Cytosolic sulfotransferase 15	LOC_Os09g08190	sulfotransferase domain containing protein
TraesCS4D02G223600	-1.28686	0.00123318	0.0490482	Down	AT1G75700	HVA22G	Putative HVA22-like protein g	LOC_Os03g14610	HVA22
TraesCS7B02G067000	-1.29202	5.30772e-05	0.00643076	Down	AT3G47800		Galactose mutarotase-like superfamily protein	LOC_Os02g36600	aldose 1-epimerase
TraesCS3A02G128500	-1.29688	0.000116937	0.0108834	Down	AT3G28480	P4H7	Probable prolyl 4-hydroxylase 7	LOC_Os01g07920	prolyl 4-hydroxylase
TraesCS5B02G080400	-1.3	0.000908343	0.0403667	Down	AT5G07830	AtGUS2	Heparanase-like protein 1	LOC_Os12g38920	heparanase-like protein precursor
TraesCS3D02G119500	-1.30267	0.00109766	0.0458345	Down	AT5G11460		Protein of unknown function (DUF581)	LOC_Os01g08520	DUF581 domain containing protein
TraesCS5A02G234300	-1.31261	0.00110195	0.0459532	Down	AT1G05010	ACO4	1-aminocyclopropane-1-carboxylate oxidase 4	LOC_Os09g27820	1-aminocyclopropane-1-carboxylate oxidase protein
TraesCS7A02G243400	-1.31424	0.00106921	0.0450036	Down	AT2G04780	FLA7	Fasciclin-like arabinogalactan protein 7	LOC_Os09g30486	fasciclin domain containing protein
TraesCS7A02G156300	-1.31945	0.000764217	0.0363304	Down	AT1G14270		CAAX amino terminal protease family protein	LOC_Os08g33900	CAAX amino terminal protease family protein
TraesCS5A02G087400	-1.32685	0.00109622	0.0458035	Down	AT3G07040	RPM1	Disease resistance protein RPM1	LOC_Os12g37740	resistance protein LR10
TraesCS6A02G319300	-1.33011	0.000411654	0.0244691	Down	AT4G25000	AMY1	Alpha-amylase 1	LOC_Os09g28420	alpha-amylase precursor
TraesCS2D02G350200	-1.34203	7.30517e-06	0.0016598	Down	AT3G07570		Cytochrome b561 and DOMON domain-containing protein At3g07570	LOC_Os04g41810	expressed protein
TraesCS7A02G211100	-1.34619	0.000204479	0.015734	Down	AT1G60800	NIK3	Protein NSP-INTERACTING KINASE 3	LOC_Os01g07630	BRASSINOSTEROID INSENSITIVE 1-associated receptor kinase 1 precursor
TraesCS2B02G401500	-1.34631	2.25334e-09	2.95107e-06	Down	AT4G21760	BGLU47	Beta-glucosidase 47	LOC_Os04g43390	Os4bglu16 - monolignol beta-glucoside homologue
TraesCS4B02G287600	-1.3518	0.00115939	0.047165	Down	AT1G69780	ATHB-13	Homeobox-leucine zipper protein ATHB-13	LOC_Os03g07450	homeobox associated leucine zipper
TraesCS1B02G228100	-1.35484	0.00122828	0.0489175	Down	AT2G41705		camphor resistance CrcB family protein	LOC_Os10g41749	crcB-like protein
TraesCS3D02G380100	-1.36405	2.06188e-08	1.80884e-05	Down	AT1G33470		RNA-binding (RRM/RBD/RNP motifs) family protein	LOC_Os01g65550	RNA recognition motif containing protein
TraesCS4D02G364800	-1.36497	5.69875e-06	0.00137388	Down	AT1G54570		Acyltransferase-like protein At1g54570%2C chloroplastic	LOC_Os09g33530	expressed protein
TraesCS1A02G373500	-1.36565	0.000163935	0.0134828	Down	AT3G14470	RPPL1	Putative disease resistance RPP13-like protein 1	LOC_Os02g16270	xa1
TraesCS7A02G491200	-1.36974	1.44425e-05	0.00267782	Down	AT4G03390	SRF3	Protein STRUBBELIG-RECEPTOR FAMILY 3	LOC_Os06g45020	STRUBBELIG-RECEPTOR FAMILY 3 precursor
TraesCS3B02G083400	-1.3805	0.000862737	0.0391667	Down	AT3G06400	CHR11	Putative chromatin-remodeling complex ATPase chain	LOC_Os01g27040	chromatin-remodeling complex ATPase chain
TraesCS4B02G144000	-1.38714	0.00077772	0.0366779	Down	AT1G10670	ACLA-1	ATP-citrate synthase alpha chain protein 1	LOC_Os11g47330	ATP-grasp domain containing protein
TraesCS2A02G290100	-1.39137	0.0007973	0.037249	Down	AT3G12920	BRG3	Probable BOI-related E3 ubiquitin-protein ligase 3	LOC_Os04g33030	protein binding protein
TraesCS7A02G054800	-1.39163	0.000209178	0.0159958	Down	AT3G15750		Essential protein Yae1%2C N-terminal	LOC_Os01g72200	expressed protein
TraesCS5D02G443900	-1.39365	0.00106558	0.044891	Down	AT1G03670		ankyrin repeat family protein	LOC_Os11g08050	expressed protein
TraesCS2B02G313200	-1.39991	7.9646e-05	0.0083475	Down	AT3G46900	COPT2	Copper transporter 2	LOC_Os04g33900	ctr copper transporter family protein
TraesCS6D02G166300	-1.40221	0.000873767	0.0394543	Down	AT5G43810	AGO10	Protein argonaute 10	LOC_Os06g39640	PINHEAD
TraesCS7B02G363700	-1.40578	0.000818194	0.0378325	Down	AT4G20930		Probable 3-hydroxyisobutyrate dehydrogenase%2C mitochondrial	LOC_Os06g46372	dehydrogenase
TraesCS1B02G175800	-1.40654	0.000364459	0.0228129	Down	AT2G29210		splicing factor PWI domain-containing protein	LOC_Os10g34200	expressed protein
TraesCS4A02G000600	-1.40689	0.000108634	0.0103674	Down	AT1G78970	LUP1	Lupeol synthase 1	LOC_Os11g18366	cycloartenol synthase
TraesCS4B02G248900	-1.40748	0.000121696	0.0112161	Down	AT3G57450		unknown protein%3B Has 65 Blast hits to 65 proteins in 11 species: Archae - 0%3B Bacteria - 0%3B Metazoa - 0%3B Fungi - 0%3B Plants - 65%3B Viruses - 0%3B Other Eukaryotes - 0 (source: NCBI BLink).	LOC_Os10g28160	expressed protein
TraesCS2D02G252400	-1.41003	0.000690004	0.034098	Down	AT1G30220	INT2	Probable inositol transporter 2	LOC_Os07g05640	transporter family protein
TraesCS4A02G234600	-1.4135	0.000106541	0.0102371	Down	AT4G37630	CYCD5-1	Cyclin-D5-1	LOC_Os03g42070	cyclin
TraesCS4A02G341900	-1.41603	0.000110907	0.0105031	Down	AT1G70150		zinc ion binding	LOC_Os07g29770	zinc finger protein
TraesCS3D02G063100	-1.41622	0.000511086	0.0280933	Down	AT1G66930		Protein kinase superfamily protein	LOC_Os01g02700	protein kinase domain containing protein
TraesCS2B02G371400	-1.42646	0.000146055	0.0125573	Down	AT3G59710		NAD(P)-binding Rossmann-fold superfamily protein	LOC_Os02g39490	carbonyl reductase 3
TraesCS2D02G274300	-1.42889	1.59502e-05	0.00282999	Down				LOC_Os04g28050	expressed protein
TraesCS3B02G224600	-1.43308	0.000807454	0.0375199	Down	AT2G16440	MCM4	DNA replication licensing factor MCM4	LOC_Os01g36390	MCM4 - Putative minichromosome maintenance MCM complex subunit 4
TraesCS7D02G279700	-1.43496	0.00049933	0.0276988	Down	AT3G20320	TGD2	Protein TRIGALACTOSYLDIACYLGLYCEROL 2%2C chloroplastic	LOC_Os01g74280	TGD2
TraesCS3A02G280200	-1.43619	5.07258e-05	0.00622547	Down	AT1G09090	RBOHB	Respiratory burst oxidase homolog protein B	LOC_Os01g61880	respiratory burst oxidase
TraesCS7B02G136000	-1.44052	0.00100576	0.0431323	Down	AT4G34050	CCOAOMT1	Caffeoyl-CoA O-methyltransferase 1	LOC_Os08g38910	caffeoyl-CoA O-methyltransferase
TraesCS4D02G327800	-1.44342	0.00104766	0.0443529	Down	AT2G47730	GSTF8	Glutathione S-transferase F8%2C chloroplastic	LOC_Os03g04240	glutathione S-transferase
TraesCS6D02G248500	-1.45578	1.48141e-05	0.00271047	Down	AT1G32170	XTH30	Probable xyloglucan endotransglucosylase/hydrolase protein 30	LOC_Os02g46910	glycosyl hydrolases family 16
TraesCS6D02G212200	-1.45748	0.000801023	0.0373217	Down	AT2G37040	PAL1	Phenylalanine ammonia-lyase 1	LOC_Os02g41630	phenylalanine ammonia-lyase
TraesCS3A02G107400	-1.46136	0.000160166	0.0133115	Down	AT4G29230	anac075	NAC domain containing protein 75	LOC_Os01g09550	no apical meristem protein
TraesCS3D02G394400	-1.46519	2.37675e-06	0.000735908	Down	AT3G03305		Putative metallophosphoesterase At3g03305	LOC_Os01g66920	Ser/Thr protein phosphatase family protein
TraesCS6D02G356300	-1.47955	4.39419e-05	0.00567959	Down	AT2G19750	RPS30C	40S ribosomal protein S30	LOC_Os02g56014	40S ribosomal protein S30
TraesCS3B02G293000	-1.48843	6.94673e-05	0.00768896	Down	AT1G68840	RAV2	AP2/ERF and B3 domain-containing transcription repressor RAV2	LOC_Os01g49830	B3 DNA binding domain containing protein
TraesCS6A02G194700	-1.49204	0.000104484	0.0101014	Down	AT5G10180	SULTR2%3B1	Sulfate transporter 2.1	LOC_Os03g09940	sulfate transporter
TraesCS5B02G246700	-1.49605	9.62749e-05	0.00951264	Down	AT2G22430	ATHB-6	Homeobox-leucine zipper protein ATHB-6	LOC_Os09g29460	homeobox associated leucine zipper
TraesCS5A02G402200	-1.49687	0.000767059	0.0364107	Down	AT4G37130	NUP58	Nuclear pore complex protein NUP58	LOC_Os09g28019	nucleoporin p58/p45
TraesCS4B02G177900	-1.50407	4.44193e-06	0.0011658	Down	AT3G10740	ASD1	Alpha-L-arabinofuranosidase 1	LOC_Os11g03780	alpha-N-arabinofuranosidase
TraesCS7A02G091900	-1.50471	0.000243918	0.0176279	Down	AT5G25940		early nodulin-related	LOC_Os06g04950	early nodulin 93 ENOD93 protein
TraesCS4B02G189900	-1.51374	5.41682e-05	0.00651297	Down	AT2G30200		catalytics%3Btransferases%3B	LOC_Os03g18590	malonyl CoA-acyl carrier protein transacylase
TraesCS5D02G205500	-1.51384	0.000204088	0.0157208	Down	AT5G23040	CPP1	Protein CHAPERONE-LIKE PROTEIN OF POR1%2C chloroplastic	LOC_Os09g21250	expressed protein
TraesCSU02G022800	-1.51596	0.00111558	0.0462163	Down	AT3G23510		Cyclopropane-fatty-acyl-phospholipid synthase	LOC_Os12g16650	Cyclopropane-fatty-acyl-phospholipid synthase
TraesCS4B02G100300	-1.52205	0.000369024	0.0229544	Down	AT5G24910	CYP714A1	Cytochrome P450 714A1	LOC_Os12g02640	cytochrome P450 72A1
TraesCS7B02G245500	-1.52581	0.000445042	0.0256172	Down	AT5G54160	OMT1	Flavone 3'-O-methyltransferase 1	LOC_Os08g06100	O-methyltransferase
TraesCS7A02G331300	-1.52926	0.000320607	0.0210071	Down	AT3G16240	TIP2-1	Aquaporin TIP2-1	LOC_Os06g22960	aquaporin protein
TraesCS6B02G220900	-1.53223	0.000100421	0.00980874	Down	AT1G53490	HEI10	E3 ubiquitin-protein ligase CCNB1IP1 homolog	LOC_Os02g13810	DNA binding protein
TraesCS2A02G176000	-1.53602	3.26918e-07	0.000162143	Down	AT1G74160		unknown protein%3B BEST Arabidopsis thaliana protein match is: unknown protein (TAIR:AT1G18620.1)%3B Has 3407 Blast hits to 2217 proteins in 314 species: Archae - 0%3B Bacteria - 264%3B Metazoa - 1296%3B Fungi - 318%3B Plants - 346%3B Viruses - 34%3B Other Eukaryot /.../149 (source: NCBI BLink).	LOC_Os07g41200	expressed protein
TraesCS2D02G395000	-1.53638	4.42941e-05	0.00570266	Down	AT4G36180		Probable LRR receptor-like serine/threonine-protein kinase At4g36180	LOC_Os04g48760	leucine-rich repeat family protein
TraesCS6D02G303600	-1.54591	0.000892675	0.0400082	Down	AT3G03270		Adenine nucleotide alpha hydrolases-like superfamily protein	LOC_Os02g53320	universal stress protein domain containing protein
TraesCS5A02G238100	-1.54644	0.000692103	0.0341531	Down	AT4G25000	AMY1	Alpha-amylase 1	LOC_Os06g49970	alpha-amylase precursor
TraesCS4D02G362800	-1.54754	0.000690267	0.034098	Down	AT2G45050	GATA2	GATA transcription factor 2	LOC_Os10g40810	GATA zinc finger domain containing protein
TraesCS2D02G396000	-1.5547	8.00825e-05	0.00837472	Down	AT3G60900	FLA10	Fasciclin-like arabinogalactan protein 10	LOC_Os04g48490	fasciclin-like arabinogalactan protein
TraesCS3D02G236000	-1.55947	0.000933067	0.041061	Down	AT1G28600		GDSL esterase/lipase At1g28600	LOC_Os01g46080	GDSL-like lipase/acylhydrolase
TraesCS2B02G475800	-1.55962	1.06479e-05	0.00215105	Down	AT4G17670		Protein of unknown function (DUF581)	LOC_Os04g49680	DUF581 domain containing protein
TraesCS6B02G375700	-1.56091	2.24185e-05	0.00355194	Down	AT5G37870		Putative E3 ubiquitin-protein ligase SINA-like 6	LOC_Os01g03190	expressed protein
TraesCS1A02G191000	-1.5722	0.000798047	0.0372649	Down				LOC_Os02g05190	expressed protein
TraesCS5D02G300100	-1.58406	0.000521451	0.028443	Down	AT5G50915	BHLH137	Transcription factor bHLH137	LOC_Os09g33580	BEE 1
TraesCS6A02G316800	-1.58883	0.000990425	0.0427901	Down	AT4G08950	EXO	Protein EXORDIUM	LOC_Os02g52000	phosphate-induced protein 1 conserved region domain containing protein
TraesCS6A02G334100	-1.5911	4.21348e-05	0.0055369	Down	AT4G25000	AMY1	Alpha-amylase 1	LOC_Os08g36910	alpha-amylase precursor
TraesCS3B02G112900	-1.59192	3.88872e-05	0.00520396	Down	AT2G40550	ETG1	Mini-chromosome maintenance complex-binding protein	LOC_Os01g07260	expressed protein
TraesCS1B02G226100	-1.59708	0.000126043	0.0114608	Down	AT1G65680	EXPB2	Putative expansin-B2	LOC_Os10g40730	expansin precursor
TraesCS2D02G517200	-1.59908	0.000748844	0.0360518	Down	AT1G80460	GLPK	Glycerol kinase	LOC_Os04g55410	FGGY family of carbohydrate kinases
TraesCS5D02G171100	-1.60126	0.0005464	0.0292498	Down	AT3G42660		transducin family protein / WD-40 repeat family protein	LOC_Os09g06560	WD domain
TraesCS7A02G460200	-1.60199	0.000702883	0.0345411	Down
TraesCS5D02G155800	-1.60528	0.000315673	0.0207989	Down	AT1G16220		Probable protein phosphatase 2C 6	LOC_Os11g01790	protein phosphatase 2c
TraesCS4D02G235800	-1.62084	0.000549938	0.0293546	Down	AT5G65700	BAM1	Leucine-rich repeat receptor-like serine/threonine-protein kinase BAM1	LOC_Os03g12730	receptor protein kinase CLAVATA1 precursor
TraesCS3D02G031800	-1.6218	0.00093922	0.0412551	Down	AT1G71695	PER12	Peroxidase 12	LOC_Os04g59150	peroxidase precursor
TraesCS6D02G097300	-1.62322	0.000731393	0.0354821	Down	AT3G52870		IQ calmodulin-binding motif family protein	LOC_Os12g05420	calmodulin-binding protein
TraesCS1D02G125300	-1.62454	7.70358e-06	0.00172958	Down	AT5G44635	MCM6	DNA replication licensing factor MCM6	LOC_Os05g14590	MCM6 - Putative minichromosome maintenance MCM complex subunit 6
TraesCS7D02G227200	-1.62462	0.000740481	0.0357947	Down	AT3G57930		unknown protein%3B BEST Arabidopsis thaliana protein match is: unknown protein (TAIR:AT2G42190.1)%3B Has 1519 Blast hits to 1241 proteins in 182 species: Archae - 0%3B Bacteria - 60%3B Metazoa - 576%3B Fungi - 133%3B Plants - 127%3B Viruses - 30%3B Other Eukaryotes /.../ (source: NCBI BLink).	LOC_Os06g21580	expressed protein
TraesCS4A02G106300	-1.6338	4.02024e-06	0.00107599	Down	AT1G07890	APX1	L-ascorbate peroxidase 1%2C cytosolic	LOC_Os03g17690	OsAPx1 - Cytosolic Ascorbate Peroxidase encoding gene 1-8
TraesCS4D02G248000	-1.63577	0.000759329	0.0362435	Down	AT1G26560	BGLU40	Beta-glucosidase 40	LOC_Os03g11420	Os3bglu6 - beta-glucosidase/beta-fucosidase/beta-galactosidase
TraesCSU02G068000	-1.63887	1.29093e-06	0.000459813	Down	AT1G56580	SVB	Protein of unknown function%2C DUF538	LOC_Os12g37650	DUF538 domain containing protein
TraesCS2D02G401400	-1.63921	0.00127121	0.0499401	Down	AT4G35590	RKD5	Protein RKD5	LOC_Os04g47640	RWP-RK domain-containing protein
TraesCS1D02G264100	-1.64	4.28357e-06	0.00113366	Down	AT1G44900	MCM2	DNA replication licensing factor MCM2	LOC_Os11g29380	MCM2 - Putative minichromosome maintenance MCM complex subunit 2
TraesCS3A02G083500	-1.64534	0.000374577	0.0231553	Down	AT3G23740		unknown protein%3B FUNCTIONS IN: molecular_function unknown%3B INVOLVED IN: biological_process unknown%3B LOCATED IN: chloroplast%3B EXPRESSED IN: 9 plant structures%3B EXPRESSED DURING: C globular stage%2C F mature embryo stage%2C petal differentiation and expan /.../tage%2C E expanded cotyledon stage%2C D bilateral stage%3B BEST Arabidopsis thaliana protein match is: unknown protein (TAIR:AT4G1…	LOC_Os01g01170	expressed protein
TraesCS5A02G088400	-1.64613	7.44649e-07	0.0003028	Down	AT4G02060	MCM7	DNA replication licensing factor MCM7	LOC_Os12g37400	MCM7 - Putative minichromosome maintenance MCM complex subunit 7
TraesCS3D02G292900	-1.64705	2.523e-05	0.00380643	Down	AT3G58590		Pentatricopeptide repeat-containing protein At3g58590	LOC_Os01g55070	pentatricopeptide
TraesCS2B02G182500	-1.6485	0.000262457	0.0184471	Down	AT2G30490	CYP73A5	Trans-cinnamate 4-monooxygenase	LOC_Os02g26810	cytochrome P450
TraesCS6B02G101800	-1.64868	0.000419504	0.0247048	Down	AT1G28120		Ubiquitin thioesterase otubain-like	LOC_Os02g30974	expressed protein
TraesCS7D02G212800	-1.65024	4.27815e-05	0.00557549	Down	AT4G30520		Probable LRR receptor-like serine/threonine-protein kinase At4g30520	LOC_Os01g07630	BRASSINOSTEROID INSENSITIVE 1-associated receptor kinase 1 precursor
TraesCS1A02G065500	-1.65054	0.000929119	0.0409443	Down				LOC_Os10g22050	expressed protein
TraesCS2A02G450500	-1.65138	1.79098e-07	0.000104652	Down				LOC_Os04g49954	expressed protein
TraesCS5D02G414400	-1.65192	0.000567222	0.0298567	Down	AT5G66600		Protein of unknown function%2C DUF547	LOC_Os03g55890	ternary complex factor MIP1
TraesCS3A02G097200	-1.65237	1.42784e-05	0.00266304	Down	AT2G40550	ETG1	Mini-chromosome maintenance complex-binding protein	LOC_Os01g07260	expressed protein
TraesCS5D02G451300	-1.6543	0.000475686	0.0267354	Down	AT2G30620		Histone H1.2	LOC_Os03g58470	retrotransposon protein
TraesCS3B02G098400	-1.6562	0.000682869	0.0338916	Down	AT3G23740		unknown protein%3B FUNCTIONS IN: molecular_function unknown%3B INVOLVED IN: biological_process unknown%3B LOCATED IN: chloroplast%3B EXPRESSED IN: 9 plant structures%3B EXPRESSED DURING: C globular stage%2C F mature embryo stage%2C petal differentiation and expan /.../tage%2C E expanded cotyledon stage%2C D bilateral stage%3B BEST Arabidopsis thaliana protein match is: unknown protein (TAIR:AT4G1…	LOC_Os01g01170	expressed protein
TraesCS7D02G442100	-1.66212	6.08653e-05	0.00708445	Down	AT1G67630	POLA2	DNA polymerase alpha 2	LOC_Os12g13950	POLA2 - Putative DNA polymerase alpha complex subunit
TraesCS2A02G274000	-1.66474	0.000123485	0.0112823	Down	AT4G12910	SCPL20	Serine carboxypeptidase-like 20	LOC_Os04g25560	OsSCP23 - Putative Serine Carboxypeptidase homologue
TraesCS5D02G101500	-1.66619	0.0001015	0.0098734	Down	AT1G47670	AATL1	Lysine histidine transporter-like 8	LOC_Os12g30040	transmembrane amino acid transporter protein
TraesCS5D02G248700	-1.67062	0.00046092	0.0262127	Down	AT1G47480	CXE2	Probable carboxylesterase 2	LOC_Os09g28690	gibberellin receptor GID1L2
TraesCS2D02G013700	-1.672	0.000356073	0.0224312	Down	AT3G24240	RCH2	Receptor-like protein kinase 2	LOC_Os04g04330	receptor-like protein kinase 2 precursor
TraesCS1D02G009700	-1.68274	0.000233057	0.0171705	Down	AT4G35160		O-methyltransferase family protein	LOC_Os09g17560	O-methyltransferase
TraesCS2A02G398500	-1.68427	0.000357962	0.0225053	Down	AT3G60900	FLA10	Fasciclin-like arabinogalactan protein 10	LOC_Os04g48490	fasciclin-like arabinogalactan protein
TraesCS5A02G072700	-1.68733	5.34106e-06	0.00131187	Down	AT1G76550	PFP-ALPHA2	Pyrophosphate--fructose 6-phosphate 1-phosphotransferase subunit alpha 2	LOC_Os02g48360	pyrophosphate--fructose 6-phosphate 1-phosphotransferase subunit alpha
TraesCS3A02G426400	-1.69185	0.00116131	0.047223	Down	AT3G07200		RING/U-box superfamily protein	LOC_Os02g04490	histone acetyltransferase HAC1
TraesCS7D02G371600	-1.69216	0.000320095	0.0209881	Down	AT4G11090	TBL23	Protein trichome birefringence-like 23	LOC_Os06g33330	powdery mildew resistant protein 5
TraesCS5D02G451200	-1.6968	1.91061e-05	0.00317865	Down	AT2G30620		Histone H1.2	LOC_Os03g58470	retrotransposon protein
TraesCS5B02G448200	-1.70286	5.37652e-05	0.00647273	Down	AT2G30620		Histone H1.2	LOC_Os03g58470	retrotransposon protein
TraesCS1B02G274600	-1.70876	4.92675e-05	0.00611166	Down	AT1G44900	MCM2	DNA replication licensing factor MCM2	LOC_Os11g29380	MCM2 - Putative minichromosome maintenance MCM complex subunit 2
TraesCS3D02G316400	-1.71511	0.000400055	0.0242041	Down	AT4G21390	B120	G-type lectin S-receptor-like serine/threonine-protein kinase B120	LOC_Os01g57480	serine/threonine-protein kinase receptor precursor
TraesCS7D02G160100	-1.71803	0.000689578	0.034098	Down	AT5G24530	DMR6	2-oxoglutarate (2OG) and Fe(II)-dependent oxygenase superfamily protein	LOC_Os07g07410	oxidoreductase
TraesCS4B02G269400	-1.71909	0.000508604	0.0280281	Down	AT2G39140	SVR1	pseudouridine synthase family protein	LOC_Os03g05806	pseudouridine synthase family protein
TraesCS5B02G511300	-1.72426	0.000295723	0.0198304	Down				LOC_Os10g30890	expressed protein
TraesCS2B02G507600	-1.72606	0.00102643	0.0437408	Down	AT1G61720	BAN	Anthocyanidin reductase	LOC_Os04g53850	leucoanthocyanidin reductase
TraesCS3B02G325900	-1.72633	2.07193e-05	0.00336719	Down	AT2G42390		protein kinase C substrate%2C heavy chain-related	LOC_Os01g54880	glucosidase 2 subunit beta precursor
TraesCS3D02G097700	-1.72806	8.80286e-05	0.00896506	Down	AT2G40550	ETG1	Mini-chromosome maintenance complex-binding protein	LOC_Os01g07260	expressed protein
TraesCS7D02G142700	-1.73773	0.000349819	0.0221847	Down	AT5G34940	AtGUS3	Heparanase-like protein 3	LOC_Os06g08090	heparanase-like protein precursor
TraesCS7D02G431100	-1.73902	0.00123972	0.0491621	Down	AT1G79110	BRG2	Probable BOI-related E3 ubiquitin-protein ligase 2	LOC_Os03g46570	protein binding protein
TraesCS1B02G449800	-1.74614	6.83704e-05	0.00760307	Down	AT1G79890		RAD3-like DNA-binding helicase protein	LOC_Os05g13300	helicase
TraesCS3A02G426300	-1.77274	0.00121548	0.0486088	Down				LOC_Os02g04490	histone acetyltransferase HAC1
TraesCS7B02G492000	-1.77774	0.000978369	0.0424435	Down	AT3G14470	RPPL1	Putative disease resistance RPP13-like protein 1	LOC_Os11g47780	pollen signalling protein with adenylyl cyclase activity
TraesCS1D02G194600	-1.77834	0.00102813	0.0437605	Down	AT5G22880	H2B	Histone H2B.10	LOC_Os01g05610	Core histone H2A/H2B/H3/H4 domain containing protein
TraesCS6B02G205500	-1.78654	0.000911538	0.0404518	Down	AT1G28110	SCPL45	Serine carboxypeptidase-like 45	LOC_Os11g31980	OsSCP63 - Putative Serine Carboxypeptidase homologue
TraesCS5A02G203700	-1.78986	0.00061909	0.0317542	Down	AT5G16940		carbon-sulfur lyases	LOC_Os09g23370	proline-rich protein 6
TraesCS7B02G422700	-1.79182	0.000598057	0.0310093	Down				LOC_Os06g43870	expressed protein
TraesCS4D02G319500	-1.79357	2.39106e-05	0.00368963	Down	AT1G15220	CCMH	Cytochrome c-type biogenesis CcmH-like mitochondrial protein	LOC_Os02g17520	cytochrome c-type biogenesis protein ccmH precursor
TraesCS5B02G236600	-1.80442	0.000204592	0.015734	Down	AT4G25000	AMY1	Alpha-amylase 1	LOC_Os06g49970	alpha-amylase precursor
TraesCS5B02G094600	-1.80662	2.71556e-08	2.23729e-05	Down	AT4G02060	MCM7	DNA replication licensing factor MCM7	LOC_Os12g37400	MCM7 - Putative minichromosome maintenance MCM complex subunit 7
TraesCS2B02G207700	-1.81602	3.65993e-05	0.00500381	Down				LOC_Os10g04850	OsFBO5 - F-box and other domain containing protein
TraesCS3A02G204300	-1.82424	0.00032807	0.0213191	Down	AT1G10910		Pentatricopeptide repeat-containing protein At1g10910%2C chloroplastic	LOC_Os01g37870	PPR repeat domain containing protein
TraesCS6A02G364300	-1.82691	1.64429e-05	0.00288645	Down	AT5G04320		Shugoshin C terminus	LOC_Os02g55570	shugoshin-1
TraesCS7A02G436000	-1.82882	0.000845455	0.0385669	Down	AT3G52850	VSR1	Vacuolar-sorting receptor 1	LOC_Os06g45380	vacuolar-sorting receptor precursor
TraesCS1B02G309800	-1.8289	0.000337962	0.0216355	Down	AT5G42120	LECRKS6	L-type lectin-domain containing receptor kinase S.6	LOC_Os02g26160	receptor lectin kinase like protein
TraesCS1B02G146200	-1.83286	0.000182679	0.0145447	Down	AT5G44635	MCM6	DNA replication licensing factor MCM6	LOC_Os05g14590	MCM6 - Putative minichromosome maintenance MCM complex subunit 6
TraesCS2D02G383800	-1.83298	4.26276e-05	0.00557377	Down	AT1G62750	CPEFG	Elongation factor G%2C chloroplastic	LOC_Os04g45490	elongation factor
TraesCS6A02G266100	-1.83421	0.000601319	0.0311155	Down	AT1G14720	XTH28	Probable xyloglucan endotransglucosylase/hydrolase protein 28	LOC_Os02g46910	glycosyl hydrolases family 16
TraesCS3D02G203400	-1.84922	2.18179e-05	0.00347422	Down	AT2G16440	MCM4	DNA replication licensing factor MCM4	LOC_Os01g36390	MCM4 - Putative minichromosome maintenance MCM complex subunit 4
TraesCS4B02G017800	-1.85047	0.000773057	0.0365131	Down	AT1G17690	NOF1	FUNCTIONS IN: molecular_function unknown%3B INVOLVED IN: biological_process unknown%3B LOCATED IN: nucleus%3B EXPRESSED IN: 24 plant structures%3B EXPRESSED DURING: 13 growth stages%3B CONTAINS InterPro DOMAIN/s: Digestive organ expansion factor%2C predicted (I /.../o:IPR010678)%3B Has 25006 Blast hits to 13379 proteins in 904 species: Archae - 102%3B Bacteria - 5571%3B Metazoa - 7448%3B Fungi - …	LOC_Os05g22920	digestive organ expansion factor
TraesCS4B02G377100	-1.85222	2.91324e-06	0.000852453	Down	AT5G39110	GLP6	Germin-like protein subfamily 1 member 14	LOC_Os08g08990	Cupin domain containing protein
TraesCS3B02G522500	-1.85877	9.394e-05	0.00941845	Down	AT5G43470	RPP8	Disease resistance protein RPP8	LOC_Os11g43700	RGH1A
TraesCS3D02G379400	-1.85993	0.000116663	0.0108734	Down	AT3G08910		DNAJ heat shock family protein	LOC_Os01g65480	dnaJ domain containing protein
TraesCS3D02G092600	-1.86078	0.000118848	0.0110321	Down	AT4G26540		Probable LRR receptor-like serine/threonine-protein kinase At4g26540	LOC_Os01g07560	receptor-like protein kinase 2 precursor
TraesCS6B02G347200	-1.86651	0.000136418	0.0119566	Down	AT4G08950	EXO	Protein EXORDIUM	LOC_Os02g52010	phosphate-induced protein 1 conserved region domain containing protein
TraesCS2B02G308300	-1.86804	0.000387881	0.0236488	Down	AT2G27830		unknown protein%3B BEST Arabidopsis thaliana protein match is: unknown protein (TAIR:AT4G22758.1)%3B Has 131 Blast hits to 131 proteins in 17 species: Archae - 0%3B Bacteria - 0%3B Metazoa - 0%3B Fungi - 0%3B Plants - 131%3B Viruses - 0%3B Other Eukaryotes - 0 (sou /.../CBI BLink).	LOC_Os04g33310	expressed protein
TraesCS2A02G046100	-1.86833	1.79096e-07	0.000104652	Down	AT3G23510		Cyclopropane-fatty-acyl-phospholipid synthase	LOC_Os12g16650	Cyclopropane-fatty-acyl-phospholipid synthase
TraesCS1D02G059500	-1.87066	6.78903e-05	0.00757637	Down	AT1G21270	WAK2	Wall-associated receptor kinase 2	LOC_Os10g07556	wall-associated receptor kinase-like 22 precursor
TraesCS7B02G008500	-1.87071	0.000413587	0.0245218	Down	AT3G46730	RPP13L3	Putative disease resistance RPP13-like protein 3	LOC_Os11g43700	RGH1A
TraesCS6D02G039300	-1.87303	5.77548e-05	0.00681449	Down	AT3G27890	NQR	NADPH:quinone oxidoreductase	LOC_Os01g72460	NADPH quinone oxidoreductase
TraesCS3B02G515100	-1.87581	0.00075649	0.0361983	Down	AT1G03230		Eukaryotic aspartyl protease family protein	LOC_Os01g71090	xylanase inhibitor
TraesCS5D02G014200	-1.87746	0.000350865	0.0222213	Down	AT3G48280	CYP71A25	Cytochrome P450 71A25	LOC_Os08g01450	cytochrome P450
TraesCS4B02G043000	-1.88862	0.000178809	0.0142966	Down	AT1G09380		WAT1-related protein At1g09380	LOC_Os03g49940	integral membrane protein
TraesCS2D02G377500	-1.88867	0.000154447	0.0130421	Down	AT2G37040	PAL1	Phenylalanine ammonia-lyase 1	LOC_Os04g43800	phenylalanine ammonia-lyase
TraesCS5A02G443900	-1.89129	0.00112622	0.046454	Down	AT2G30620		Histone H1.2	LOC_Os03g58470	retrotransposon protein
TraesCS6B02G258400	-1.8926	0.000144904	0.0125037	Down	AT2G37040	PAL1	Phenylalanine ammonia-lyase 1	LOC_Os02g41630	phenylalanine ammonia-lyase
TraesCS3A02G488400	-1.90875	0.000186131	0.0147451	Down	AT1G24620	CML25	Probable calcium-binding protein CML25	LOC_Os01g72100	OsCML10 - Calmodulin-related calcium sensor protein
TraesCS6A02G231700	-1.91713	0.000221805	0.0166127	Down	AT1G34580	STP5	Sugar transport protein 5	LOC_Os02g36450	transporter family protein
TraesCS5A02G093000	-1.92794	8.27626e-05	0.00859253	Down	AT3G16570	RALF23	Rapid alkalinization factor 23	LOC_Os12g35670	RALFL4 - Rapid ALkalinization Factor RALF family protein precursor
TraesCS6D02G136600	-1.9307	0.000791869	0.0370325	Down	AT1G15950	CCR1	Cinnamoyl-CoA reductase 1	LOC_Os02g08420	cinnamoyl CoA reductase
TraesCS1D02G092200	-1.93691	1.59434e-05	0.00282999	Down	AT2G47940	DEGP2	Protease Do-like 2%2C chloroplastic	LOC_Os05g05480	OsDegp6 - Putative Deg protease homologue
TraesCS4A02G094000	-1.94019	7.26111e-05	0.00786241	Down	AT2G39770	CYT1	Mannose-1-phosphate guanylyltransferase 1	LOC_Os03g16150	mannose-1-phosphate guanyltransferase
TraesCS1B02G146900	-1.94415	0.00123426	0.0490527	Down	AT4G20400	JMJ14	Probable lysine-specific demethylase JMJ14	LOC_Os05g23670	transcription factor jumonji
TraesCS7A02G240400	-1.9501	0.00028319	0.019303	Down	AT4G34050	CCOAOMT1	Caffeoyl-CoA O-methyltransferase 1	LOC_Os08g38910	caffeoyl-CoA O-methyltransferase
TraesCS3B02G151200	-1.96917	0.000290213	0.0195879	Down	AT3G46290	HERK1	Receptor-like protein kinase HERK 1	LOC_Os01g06280	TKL_IRAK_CrRLK1L-1.4 - The CrRLK1L-1 subfamily has homology to the CrRLK1L homolog
TraesCS3B02G340900	-1.97049	0.00094237	0.0413552	Down	AT3G44020		thylakoid lumenal P17.1 protein	LOC_Os01g70460	expressed protein
TraesCS6A02G150600	-1.97383	0.000292567	0.0196872	Down	AT4G24920	SEC61G2	Protein transport protein Sec61 subunit gamma-1	LOC_Os02g08180	protein transport protein SEC61 subunit gamma
TraesCS6D02G313300	-1.9842	0.000448299	0.025711	Down	AT4G25000	AMY1	Alpha-amylase 1	LOC_Os09g28420	alpha-amylase precursor
TraesCS6D02G296200	-1.98636	0.000347953	0.0220811	Down	AT4G08950	EXO	Protein EXORDIUM	LOC_Os02g52010	phosphate-induced protein 1 conserved region domain containing protein
TraesCS1D02G366700	-1.98993	0.00014558	0.0125392	Down	AT4G36220	CYP84A1	Cytochrome P450 84A1	LOC_Os10g36848	cytochrome P450
TraesCS7A02G438400	-1.99782	0.000814267	0.0377641	Down	AT5G02560	HTA12	Probable histone H2A.4	LOC_Os05g02300	Core histone H2A/H2B/H3/H4 domain containing protein
TraesCS2B02G519200	-2.00193	0.000863574	0.0391687	Down	AT1G19850	ARF5	Auxin response factor 5	LOC_Os04g56850	auxin response factor
TraesCS6A02G264200	-2.00225	0.00108108	0.0453022	Down	AT1G72210	BHLH96	Transcription factor bHLH96	LOC_Os02g46560	helix-loop-helix DNA-binding protein
TraesCS1D02G048200	-2.00335	3.02405e-05	0.00430205	Down	AT1G31120	POT10	Potassium transporter 10	LOC_Os09g38960	potassium transporter
TraesCS1B02G298100	-2.0064	0.00116531	0.0473045	Down	AT3G09660	MCM8	minichromosome maintenance 8	LOC_Os05g38850	MCM8 - Putative minichromosome maintenance MCM family subunit 8
TraesCS7B02G459300	-2.0138	0.000271997	0.0188244	Down	AT1G47290	3BETAHSD/D1	3beta-hydroxysteroid-dehydrogenase/decarboxylase isoform 1	LOC_Os03g29170	sterol-4-alpha-carboxylate 3-dehydrogenase
TraesCS1B02G189400	-2.01851	0.0010246	0.0436891	Down	AT5G38170		Bifunctional inhibitor/lipid-transfer protein/seed storage 2S albumin superfamily protein	LOC_Os10g36170	LTPL160 - Protease inhibitor/seed storage/LTP family protein precursor
TraesCS4A02G295300	-2.01953	0.000135462	0.011936	Down	AT3G22550		Protein of unknown function (DUF581)	LOC_Os03g46260	DUF581 domain containing protein
TraesCS3D02G479500	-2.03153	1.80043e-07	0.000104652	Down	AT3G10140	RECA3	DNA repair protein recA homolog 2%2C mitochondrial	LOC_Os01g71690	recA protein
TraesCS6B02G294900	-2.03363	2.8793e-05	0.00418409	Down	AT1G30650	WRKY14	Probable WRKY transcription factor 14	LOC_Os02g47060	WRKY66
TraesCS7B02G492800	-2.04338	0.000466631	0.0263791	Down
TraesCS6B02G423900	-2.05172	0.000127275	0.0115188	Down	AT1G02205	CER1	Protein ECERIFERUM 1	LOC_Os02g56920	WAX2
TraesCS6D02G297300	-2.05578	0.00083317	0.0381719	Down	AT1G78260		RNA-binding (RRM/RBD/RNP motifs) family protein	LOC_Os02g51890	RNA recognition motif containing protein
TraesCS2D02G182000	-2.0596	0.000414521	0.0245617	Down	AT3G29970		B12D protein	LOC_Os07g41340	B12D protein
TraesCS2B02G072400	-2.0674	0.000386939	0.023619	Down	AT3G51970	ASAT1	Acyl-CoA--sterol O-acyltransferase 1	LOC_Os04g20880	wax synthase isoform 1
TraesCS2D02G479100	-2.11435	0.000997199	0.0429543	Down	AT1G50410		SNF2 domain-containing protein / helicase domain-containing protein / zinc finger protein-related	LOC_Os04g53720	SNF2 family N-terminal domain containing protein
TraesCS2D02G583100	-2.11827	0.000278393	0.0191441	Down	AT1G71695	PER12	Peroxidase 12	LOC_Os04g59260	peroxidase precursor
TraesCS5B02G448500	-2.12884	3.91759e-06	0.00106286	Down	AT2G30620		Histone H1.2	LOC_Os03g58470	retrotransposon protein
TraesCS7B02G101200	-2.13068	3.64801e-05	0.00499472	Down	AT1G13570		F-box/FBD/LRR-repeat protein At1g13570	LOC_Os04g13150	OsFBX125 - F-box domain containing protein
TraesCS2D02G295700	-2.13241	0.00121591	0.0486088	Down	AT5G22200		Late embryogenesis abundant (LEA) hydroxyproline-rich glycoprotein family	LOC_Os04g33990	harpin-induced protein 1 domain containing protein
TraesCS2A02G109800	-2.14204	0.000179838	0.0143547	Down	AT3G16770	RAP2-3	Ethylene-responsive transcription factor RAP2-3	LOC_Os07g47790	AP2 domain containing protein
TraesCS7A02G092000	-2.14579	0.00121531	0.0486088	Down	AT5G25940		early nodulin-related	LOC_Os06g05000	early nodulin 93 ENOD93 protein
TraesCS6A02G367300	-2.15005	0.000220636	0.0165576	Down	AT5G34940	AtGUS3	Heparanase-like protein 3	LOC_Os02g55870	heparanase-like protein precursor
TraesCS2B02G592600	-2.15697	0.000289011	0.019573	Down	AT1G28310	DOF1.4	Dof zinc finger protein DOF1.4	LOC_Os04g58190	dof zinc finger domain containing protein
TraesCS4A02G081500	-2.1579	0.000109659	0.0104315	Down	AT4G12610	RAP74	transcription activators%3BDNA binding%3BRNA polymerase II transcription factors%3Bcatalytics%3Btranscription initiation factors	LOC_Os10g10990	transcription initiation factor IIF
TraesCS1B02G222400	-2.15993	0.000129271	0.0116657	Down	AT1G63680	ATMURE	acid-amino acid ligases%3Bligases%3BATP binding%3BATP binding%3Bligases	LOC_Os10g40130	Mur ligase family protein
TraesCS5A02G516300	-2.16295	0.000334515	0.0215469	Down	AT1G05260	PER3	Peroxidase 3	LOC_Os03g02920	peroxidase precursor
TraesCS1B02G379700	-2.16386	0.000281494	0.0192427	Down	AT5G11950	LOG8	Cytokinin riboside 5'-monophosphate phosphoribohydrolase LOG8	LOC_Os05g46360	possible lysine decarboxylase domain containing protein
TraesCS7A02G213600	-2.16682	2.91777e-07	0.000150243	Down	AT5G16690	ORC3	Origin of replication complex subunit 3	LOC_Os10g26280	ORC3 - Putative origin recognition complex subunit 3
TraesCSU02G076900	-2.18219	0.000114304	0.0107512	Down
TraesCS2A02G092400	-2.18895	1.19206e-05	0.00233837	Down	AT3G08840		D-alanine--D-alanine ligase family	LOC_Os07g49110	D-alanine--D-alanine ligase family
TraesCS6B02G381800	-2.18963	0.000305075	0.0203125	Down	AT5G57710		Double Clp-N motif-containing P-loop nucleoside triphosphate hydrolases superfamily protein	LOC_Os02g54720	expressed protein
TraesCS4A02G241400	-2.19335	0.000876142	0.039529	Down
TraesCS4A02G123400	-2.19571	0.000229214	0.0169665	Down	AT1G09250	BHLH149	Transcription factor bHLH149	LOC_Os03g19780	expressed protein
TraesCS5B02G411900	-2.20404	0.00121231	0.0486088	Down	AT1G10020		Protein of unknown function (DUF1005)	LOC_Os03g56220	stress-induced protein
TraesCS3D02G177100	-2.22637	7.21681e-07	0.000297178	Down
TraesCS4D02G062100	-2.23073	6.60819e-05	0.00743586	Down	AT2G23760	BLH4	BEL1-like homeodomain protein 4	LOC_Os03g52239	homeobox domain containing protein
TraesCS6B02G145100	-2.23597	1.66443e-05	0.0029042	Down	AT1G61000		FUNCTIONS IN: molecular_function unknown%3B INVOLVED IN: mitosis%3B LOCATED IN: plasma membrane%3B EXPRESSED IN: cultured cell%3B CONTAINS InterPro DOMAIN/s: Kinetochore protein Nuf2 (InterPro:IPR005549)%3B Has 50972 Blast hits to 29793 proteins in 2070 speci /.../chae - 902%3B Bacteria - 7404%3B Metazoa - 23628%3B Fungi - 4156%3B Plants - 2312%3B Viruses - 158%3B Other Eukaryotes - 12412 (source…	LOC_Os03g38010	nuf2 family protein
TraesCS1B02G416600	-2.23949	0.000802797	0.0373584	Down	AT5G22880	H2B	Histone H2B.10	LOC_Os01g05610	Core histone H2A/H2B/H3/H4 domain containing protein
TraesCS3B02G569800	-2.24607	0.000387144	0.023619	Down	AT3G46530	RPP13	Disease resistance protein RPP13	LOC_Os11g27430	NB-ARC domain containing protein
TraesCS3A02G206200	-2.25094	0.00107556	0.0451705	Down	AT1G56660		unknown protein%3B Has 665200 Blast hits to 205811 proteins in 4684 species: Archae - 3320%3B Bacteria - 107592%3B Metazoa - 249086%3B Fungi - 76753%3B Plants - 38542%3B Viruses - 3008%3B Other Eukaryotes - 186899 (source: NCBI BLink).	LOC_Os01g39000	ZmGR2c
TraesCS3B02G456800	-2.25386	0.00111424	0.0461819	Down	AT2G31980	CYS2	Cysteine proteinase inhibitor 2	LOC_Os01g68660	cysteine proteinase inhibitor precursor protein
TraesCS5D02G148700	-2.26126	2.25559e-05	0.00355587	Down	AT2G42380	BZIP34	Basic leucine zipper 34	LOC_Os02g14910	bZIP transcription factor family protein
TraesCS2D02G533700	-2.27964	0.00046448	0.0263361	Down	AT4G10270		Wound-responsive family protein	LOC_Os04g54300	wound induced protein
TraesCS1A02G150100	-2.29347	0.000953909	0.0417455	Down	AT4G04220	AtRLP46	receptor like protein 46	LOC_Os10g33140	hcrVf2 protein
TraesCS1D02G013300	-2.29714	2.41175e-05	0.00370347	Down	AT1G09630	RABA2A	Ras-related protein RABA2a	LOC_Os05g01480	ras-related protein
TraesCS3D02G192700	-2.29811	0.000228153	0.0169127	Down	AT1G55530		RING/U-box superfamily protein	LOC_Os01g16950	zinc finger
TraesCS7A02G195800	-2.30098	0.000300786	0.0200975	Down	AT1G70170	MMP	matrix metalloproteinase	LOC_Os06g13180	metalloendoproteinase 1 precursor
TraesCS7D02G426700	-2.30387	0.000382402	0.0234505	Down	AT3G15210	ERF4	Ethylene-responsive transcription factor 4	LOC_Os06g47590	AP2 domain containing protein
TraesCS7D02G442300	-2.30451	0.0011537	0.0470436	Down	AT1G05260	PER3	Peroxidase 3	LOC_Os06g46799	peroxidase precursor
TraesCS3D02G510300	-2.30943	0.000282832	0.0193029	Down	AT4G02890	UBQ14	Polyubiquitin 11	LOC_Os04g53620	ubiquitin family protein
TraesCS7A02G092800	-2.32135	2.68734e-05	0.00395979	Down	AT5G25940		early nodulin-related	LOC_Os06g05000	early nodulin 93 ENOD93 protein
TraesCS3A02G331300	-2.32401	1.20248e-06	0.000436514	Down	AT5G15100	PIN5	Putative auxin efflux carrier component 5	LOC_Os01g58860	auxin efflux carrier component
TraesCS6B02G203600	-2.32614	0.000447007	0.0256835	Down
TraesCS6D02G313500	-2.32656	1.96125e-07	0.000112618	Down	AT4G25000	AMY1	Alpha-amylase 1	LOC_Os08g36910	alpha-amylase precursor
TraesCS6A02G360600	-2.33409	2.94823e-05	0.00423279	Down	AT2G07690	MCM5	DNA replication licensing factor MCM5	LOC_Os02g55410	MCM5 - Putative minichromosome maintenance MCM complex subunit 5
TraesCS4A02G486700	-2.34772	0.00013258	0.0117884	Down	AT1G14330		Galactose oxidase/kelch repeat superfamily protein	LOC_Os10g22484	RGH2B
TraesCS4A02G160900	-2.35492	0.000121816	0.0112163	Down	AT2G01710		Chaperone DnaJ-domain superfamily protein	LOC_Os03g27460	heat shock protein DnaJ
TraesCS4A02G102900	-2.35611	0.00101463	0.0433808	Down	AT3G46290	HERK1	Receptor-like protein kinase HERK 1	LOC_Os03g17300	TKL_IRAK_CrRLK1L-1.7 - The CrRLK1L-1 subfamily has homology to the CrRLK1L homolog
TraesCS2D02G180500	-2.36955	1.15523e-05	0.00228029	Down	AT4G16380		Heavy metal transport/detoxification superfamily protein	LOC_Os07g41600	proline-rich protein
TraesCS3D02G536300	-2.37455	2.32707e-05	0.00360852	Down
TraesCS3A02G281500	-2.37664	0.000215014	0.0162843	Down	AT1G78780		pathogenesis-related family protein	LOC_Os01g53090	pathogen-related protein
TraesCS5A02G245200	-2.3796	5.47459e-05	0.00657409	Down	AT4G37080		Protein of unknown function%2C DUF547	LOC_Os09g28850	expressed protein
TraesCS3D02G317000	-2.38411	0.000752999	0.0361125	Down	AT4G21380	SD18	Receptor-like serine/threonine-protein kinase SD1-8	LOC_Os03g35600	serine/threonine-protein kinase receptor precursor
TraesCS5B02G449000	-2.40245	0.000465206	0.0263457	Down	AT2G30620		Histone H1.2	LOC_Os03g58470	retrotransposon protein
TraesCS5A02G516600	-2.40849	0.000376567	0.0231978	Down	AT1G01030	NGA3	B3 domain-containing transcription factor NGA3	LOC_Os03g02900	B3 DNA binding domain containing protein
TraesCS6A02G161200	-2.41056	0.000182324	0.0145286	Down	AT5G48310		unknown protein%3B BEST Arabidopsis thaliana protein match is: unknown protein (TAIR:AT4G24610.1)%3B Has 1807 Blast hits to 1807 proteins in 277 species: Archae - 0%3B Bacteria - 0%3B Metazoa - 736%3B Fungi - 347%3B Plants - 385%3B Viruses - 0%3B Other Eukaryotes - /.../source: NCBI BLink).	LOC_Os02g10490	expressed protein
TraesCS7B02G006000	-2.41087	0.000342427	0.0218181	Down	AT5G56610		Phosphotyrosine protein phosphatases superfamily protein	LOC_Os06g05870	dual specificity protein phosphatase
TraesCS5D02G144700	-2.41508	7.2183e-05	0.00784528	Down	AT5G58375		Methyltransferase-related protein	LOC_Os11g02200	expressed protein
TraesCS2B02G069400	-2.41948	0.00061081	0.0315206	Down	AT4G37360	CYP81D2	cytochrome P450%2C family 81%2C subfamily D%2C polypeptide 2	LOC_Os04g18380	cytochrome P450
TraesCS2B02G304400	-2.42466	0.000205612	0.0157805	Down	AT2G33550		Homeodomain-like superfamily protein	LOC_Os04g32590	transcription factor
TraesCS7A02G161300	-2.43307	0.000283899	0.0193096	Down	AT3G18460	PCR4	Protein PLANT CADMIUM RESISTANCE 4	LOC_Os02g18540	uncharacterized Cys-rich domain containing protein
TraesCS4B02G109600	-2.4359	0.000389856	0.0237539	Down	AT3G47570		Probable LRR receptor-like serine/threonine-protein kinase At3g47570	LOC_Os02g40180	receptor-like protein kinase 5 precursor
TraesCS5A02G436100	-2.44088	4.64366e-05	0.00589195	Down	AT3G53700	MEE40	Pentatricopeptide repeat-containing protein At3g53700%2C chloroplastic	LOC_Os03g58120	PPR repeat domain containing protein
TraesCS1D02G278800	-2.44623	0.000732566	0.0355027	Down	AT1G32540	LOL1	Protein LOL1	LOC_Os08g06280	LSD1 zinc finger domain containing protein
TraesCS5A02G192100	-2.44675	0.000420365	0.0247378	Down	AT3G07040	RPM1	Disease resistance protein RPM1	ChrSy.fgenesh.mRNA	expressed protein
TraesCS4A02G306400	-2.45256	0.000346976	0.0220339	Down	AT2G27470	NF-YB11	nuclear factor Y%2C subunit B11	LOC_Os09g39490	histone-like transcription factor and archaeal histone
TraesCS4D02G149600	-2.4577	2.37522e-06	0.000735908	Down	AT3G26780		Phosphoglycerate mutase family protein	LOC_Os11g31880	phosphoglycerate mutase
TraesCS4A02G217100	-2.47314	0.000719736	0.0350782	Down	AT1G65870	DIR21	Dirigent protein 21	LOC_Os11g07670	dirigent
TraesCS7A02G484400	-2.47608	0.000626739	0.0319941	Down				LOC_Os02g40940	expressed protein
TraesCS5A02G145900	-2.49275	0.00115043	0.0470226	Down	AT4G19985		Acyl-CoA N-acyltransferases (NAT) superfamily protein	LOC_Os05g44020	acetyltransferase
TraesCS5D02G100800	-2.49409	3.12408e-09	3.69992e-06	Down	AT4G02060	MCM7	DNA replication licensing factor MCM7	LOC_Os12g37400	MCM7 - Putative minichromosome maintenance MCM complex subunit 7
TraesCS3D02G470500	-2.50123	0.000334831	0.0215515	Down	AT3G12390		Nascent polypeptide-associated complex subunit alpha-like protein 1	LOC_Os01g71230	nascent polypeptide-associated complex subunit alpha-like protein 3
TraesCS7D02G373300	-2.50381	9.49596e-05	0.00946061	Down	AT5G25360		unknown protein%3B BEST Arabidopsis thaliana protein match is: unknown protein (TAIR:AT4G32342.1)%3B Has 1807 Blast hits to 1807 proteins in 277 species: Archae - 0%3B Bacteria - 0%3B Metazoa - 736%3B Fungi - 347%3B Plants - 385%3B Viruses - 0%3B Other Eukaryotes - /.../source: NCBI BLink).	LOC_Os02g10720	expressed protein
TraesCS6A02G413400	-2.50633	0.00017441	0.0140278	Down	AT2G24490	RPA2A	Replication protein A 32 kDa subunit A	LOC_Os02g58220	RPA2A - Putative single-stranded DNA binding complex subunit 2
TraesCS2B02G416300	-2.51044	0.000500028	0.0277102	Down	AT2G36400	GRF3	Growth-regulating factor 3	LOC_Os04g48510	growth regulating factor protein
TraesCS4A02G241500	-2.51177	4.78472e-06	0.0012232	Down	AT4G33280	REM16	B3 domain-containing protein REM16	LOC_Os03g42240	B3 DNA binding domain containing protein
TraesCS1A02G264500	-2.51185	0.000452898	0.0258964	Down	AT1G77380	AAP3	Amino acid permease 3	LOC_Os12g08090	amino acid transporter
TraesCS6B02G326200	-2.51287	3.03761e-06	0.000874776	Down	AT2G01670	NUDT17	Nudix hydrolase 17%2C mitochondrial	LOC_Os02g50130	hydrolase
TraesCS1D02G209700	-2.51912	1.4878e-05	0.00271083	Down	AT5G22940	F8H	Probable glucuronoxylan glucuronosyltransferase F8H	LOC_Os03g01760	exostosin family domain containing protein
TraesCS1A02G427400	-2.52065	0.000243466	0.0176202	Down	AT1G53300	TTL1	TPR repeat-containing thioredoxin TTL1	LOC_Os01g42960	TTL1
TraesCS2D02G395200	-2.52132	0.000248835	0.0178337	Down	AT2G18050	HIS1-3	histone H1-3	LOC_Os04g18090	histone H1
TraesCS3A02G446100	-2.52429	4.70175e-06	0.00121382	Down				LOC_Os02g15160	OsFBX40 - F-box domain containing protein
TraesCS3B02G170700	-2.52999	0.000889731	0.0398952	Down				LOC_Os01g12000	expressed protein
TraesCS2B02G064900	-2.53227	0.000599603	0.0310607	Down	AT5G45540		Protein of unknown function (DUF594)	LOC_Os04g06990	expressed protein
TraesCS5A02G413700	-2.53338	0.00110795	0.0460412	Down	AT4G25800	CBP60D	Calmodulin-binding protein 60 D	LOC_Os03g56660	calmodulin binding protein
TraesCS7A02G010300	-2.53854	2.37706e-05	0.00367401	Down	AT5G60710		Zinc finger (C3HC4-type RING finger) family protein	LOC_Os12g24390	retrotransposon protein
TraesCS5B02G219300	-2.56205	0.000159359	0.0132794	Down				LOC_Os09g25860	expressed protein
TraesCS4B02G051000	-2.57266	4.76814e-06	0.0012232	Down	AT5G19290		alpha/beta-Hydrolases superfamily protein	LOC_Os01g21560	esterase/lipase/thioesterase family protein
TraesCS1B02G296000	-2.58737	0.000624384	0.0319462	Down	AT1G04110	SBT1.2	Subtilisin-like protease SBT1.2	LOC_Os07g48650	OsSub54 - Putative Subtilisin homologue
TraesCS3B02G418500	-2.58901	0.000753191	0.0361125	Down	AT3G08910		DNAJ heat shock family protein	LOC_Os01g65480	dnaJ domain containing protein
TraesCS2B02G399600	-2.59609	0.000203564	0.0156932	Down	AT2G20515		unknown protein%3B FUNCTIONS IN: molecular_function unknown%3B INVOLVED IN: biological_process unknown%3B LOCATED IN: endomembrane system%3B EXPRESSED IN: 16 plant structures%3B EXPRESSED DURING: 7 growth stages%3B Has 71 Blast hits to 71 proteins in 14 species /.../ae - 0%3B Bacteria - 0%3B Metazoa - 0%3B Fungi - 0%3B Plants - 71%3B Viruses - 0%3B Other Eukaryotes - 0 (source: NCBI BLink).	LOC_Os04g43670	expressed protein
TraesCSU02G095500	-2.60427	0.000409048	0.0244691	Down	AT3G59140	ABCC10	ABC transporter C family member 10	LOC_Os06g06440	ABC transporter
TraesCS5B02G235700	-2.60988	0.000672916	0.0335542	Down	AT3G50340		unknown protein%3B BEST Arabidopsis thaliana protein match is: unknown protein (TAIR:AT5G67020.1)%3B Has 128 Blast hits to 128 proteins in 39 species: Archae - 0%3B Bacteria - 46%3B Metazoa - 0%3B Fungi - 3%3B Plants - 76%3B Viruses - 0%3B Other Eukaryotes - 3 (sou /.../CBI BLink).	LOC_Os09g28340	expressed protein
TraesCS1A02G206300	-2.61131	0.000254464	0.0180595	Down	AT5G64010		unknown protein%3B FUNCTIONS IN: molecular_function unknown%3B INVOLVED IN: biological_process unknown%3B LOCATED IN: cellular_component unknown%3B EXPRESSED IN: 23 plant structures%3B EXPRESSED DURING: 13 growth stages%3B Has 34 Blast hits to 34 proteins in 12 /.../es: Archae - 0%3B Bacteria - 0%3B Metazoa - 0%3B Fungi - 0%3B Plants - 34%3B Viruses - 0%3B Other Eukaryotes - 0 (source: NCBI BLink…
TraesCS6D02G215000	-2.61334	5.95187e-13	2.96798e-09	Down	AT5G23210	SCPL34	Serine carboxypeptidase-like 34	LOC_Os02g42310	OsSCP8 - Putative Serine Carboxypeptidase homologue
TraesCSU02G028100	-2.61624	0.000871514	0.0394141	Down				LOC_Os02g32190	expressed protein
TraesCS5A02G316600	-2.61636	6.31058e-05	0.00722105	Down	AT3G61880	CYP78A9	Cytochrome P450 78A9	LOC_Os09g35940	cytochrome P450
TraesCS7B02G411600	-2.61933	0.000752563	0.0361125	Down	AT3G19810		Protein of unknown function (DUF177)	LOC_Os02g58450	uncharacterized ACR
TraesCS1B02G148900	-2.62312	0.000271248	0.0187925	Down	AT1G32400	TOM2A	Tobamovirus multiplication protein 2A	LOC_Os08g18044	tetraspanin family protein
TraesCS2B02G372000	-2.63733	0.00105756	0.0446325	Down	AT5G57660	COL5	Zinc finger protein CONSTANS-LIKE 5	LOC_Os04g42020	CCT/B-box zinc finger protein
TraesCS1A02G428400	-2.6409	0.000137409	0.0120101	Down	AT4G02610	TRPA1	Tryptophan synthase alpha chain	LOC_Os07g08430	indole-3-glycerol phosphate lyase
TraesCS1D02G162300	-2.65742	0.000242449	0.0175754	Down	AT1G64980	CDI	Protein CDI	LOC_Os10g37230	expressed protein
TraesCS2B02G143800	-2.65877	0.000739805	0.0357947	Down	AT5G42510	DIR1	Dirigent protein 1	LOC_Os07g01680	dirigent
TraesCS2D02G601200	-2.66905	2.10984e-05	0.00340544	Down	AT3G07040	RPM1	Disease resistance protein RPM1	LOC_Os11g32170	stripe rust resistance protein Yr10
TraesCS3D02G291000	-2.68378	7.78152e-05	0.0082414	Down	AT2G42390		protein kinase C substrate%2C heavy chain-related	LOC_Os01g54880	glucosidase 2 subunit beta precursor
TraesCS7B02G187300	-2.68402	0.00122537	0.048863	Down	AT4G17800	AHL23	AT-hook motif nuclear-localized protein 23	LOC_Os08g06320	DNA binding protein
TraesCS7B02G317000	-2.69024	0.000977196	0.042412	Down	AT4G16130	ARA1	L-arabinokinase	LOC_Os06g48940	GHMP kinases ATP-binding protein
TraesCS1B02G242000	-2.69255	1.34016e-10	2.70159e-07	Down	AT5G41880	POLA3	DNA primases%3BDNA primases	LOC_Os05g29010	POLA4 - Putative DNA polymerase alpha complex subunit
TraesCS3D02G003900	-2.70935	4.01811e-06	0.00107599	Down	AT1G21270	WAK2	Wall-associated receptor kinase 2	LOC_Os04g29960	OsWAK43 - OsWAK receptor-like protein kinase
TraesCS5B02G192000	-2.71095	0.000292458	0.0196872	Down	AT4G39830		Cupredoxin superfamily protein	LOC_Os09g20090	L-ascorbate oxidase precursor
TraesCS7A02G455900	-2.72292	0.000267277	0.0185928	Down	AT1G07745	RAD51D	DNA repair protein RAD51 homolog 4	LOC_Os09g01680	DNA repair protein RAD51 homolog 4
TraesCS4B02G130100	-2.72463	5.52756e-05	0.0065876	Down	AT2G01420	PIN4	Auxin efflux carrier component 4	LOC_Os06g12610	auxin efflux carrier component
TraesCS2A02G253100	-2.73517	7.09761e-05	0.00777423	Down	AT1G79040	PSBR	Photosystem II 10 kDa polypeptide%2C chloroplastic	LOC_Os07g05365	photosystem II 10 kDa polypeptide
TraesCS3D02G039200	-2.74003	4.03868e-07	0.000191325	Down	AT3G05230		Signal peptidase complex subunit 3A	LOC_Os01g04030	signal peptidase complex subunit 3
TraesCS3B02G315600	-2.74049	0.000423195	0.0247966	Down	AT1G29280	WRKY65	Probable WRKY transcription factor 65	LOC_Os01g53040	WRKY14
TraesCS2D02G349700	-2.7544	0.000647592	0.0327761	Down	AT5G11420		Protein of unknown function%2C DUF642	LOC_Os04g41740	expressed protein
TraesCS4D02G027600	-2.75502	0.000982377	0.0425394	Down	AT3G57530	CPK32	Calcium-dependent protein kinase 32	LOC_Os03g48270	CAMK_CAMK_like.21 - CAMK includes calcium/calmodulin depedent protein kinases
TraesCS1B02G416700	-2.76158	9.58037e-07	0.000364539	Down	AT1G33540	scpl18	serine carboxypeptidase-like 18	LOC_Os03g52040	OsSCP19 - Putative Serine Carboxypeptidase homologue
TraesCS5D02G172400	-2.76335	0.0009349	0.0410844	Down	AT3G07720		Galactose oxidase/kelch repeat superfamily protein	LOC_Os09g07460	kelch repeat protein
TraesCS5D02G413200	-2.76356	0.000542332	0.0291953	Down	AT5G42650	CYP74A	Allene oxide synthase%2C chloroplastic	LOC_Os03g55800	cytochrome P450
TraesCS1B02G255000	-2.76484	0.000933657	0.0410679	Down	AT1G06800	PLA-I{gamma}1	Phospholipase A1-Igamma1%2C chloroplastic	LOC_Os05g32380	phospholipase
TraesCS3B02G459600	-2.7671	0.00046164	0.0262221	Down	AT5G16490	RIC4	CRIB domain-containing protein RIC4	LOC_Os01g68890	P21-Rho-binding domain containing protein
TraesCS1A02G066400	-2.76774	0.000210741	0.0160634	Down	AT1G48030	LPD1	Dihydrolipoyl dehydrogenase 1%2C mitochondrial	LOC_Os01g22520	dihydrolipoyl dehydrogenase 1
TraesCS3D02G481300	-2.76827	0.000116715	0.0108734	Down	AT1G07130	STN1	CST complex subunit STN1	LOC_Os03g25130	OB-fold nucleic acid binding domain containing protein
TraesCS6A02G290600	-2.76877	0.000637247	0.0323735	Down	AT5G23060	CAS	Calcium sensing receptor%2C chloroplastic	LOC_Os02g49680	arsenate reductase
TraesCS3D02G072300	-2.77301	0.000195439	0.0151779	Down	AT3G25670		Leucine-rich repeat (LRR) family protein	LOC_Os01g02060	TOO MANY MOUTHS precursor
TraesCS4A02G231200	-2.77348	0.00032491	0.0212157	Down	AT5G60920	COB	Protein COBRA	LOC_Os05g32110	COBRA
TraesCS1B02G110400	-2.78877	0.000266522	0.0185539	Down	AT2G47940	DEGP2	Protease Do-like 2%2C chloroplastic	LOC_Os05g05480	OsDegp6 - Putative Deg protease homologue
TraesCS3B02G536200	-2.79202	0.00046995	0.0265035	Down	AT1G24620	CML25	Probable calcium-binding protein CML25	LOC_Os01g72100	OsCML10 - Calmodulin-related calcium sensor protein
TraesCS2B02G059500	-2.79215	3.69026e-05	0.005038	Down	AT4G31380	FLP1	FPF1-like protein 1	LOC_Os07g47450	flowering promoting factor-like 1
TraesCS2B02G232800	-2.79264	0.000646018	0.0327313	Down	AT1G61350		ARM repeat superfamily protein	LOC_Os07g37350	armadillo/beta-catenin repeat family protein
TraesCS1D02G043300	-2.79632	0.000441843	0.0255106	Down	AT3G46130	MYB48	Transcription factor MYB48	LOC_Os12g37970	MYB family transcription factor
TraesCS1D02G181400	-2.79677	0.000274899	0.0189422	Down	ATCG00470	ATPE	ATP synthase epsilon chain%2C chloroplastic	LOC_Os10g21264	ATP synthase epsilon chain
TraesCS1B02G242300	-2.79959	0.000369858	0.0229695	Down	AT3G05640		Probable protein phosphatase 2C 34	LOC_Os05g29030	protein phosphatase 2C
TraesCS2A02G407500	-2.805	2.90716e-05	0.00420522	Down	AT1G01600	CYP86A4	Cytochrome P450 86A4	LOC_Os02g44654	cytochrome P450
TraesCS1B02G392000	-2.80683	7.78509e-05	0.0082414	Down	AT1G68840	RAV2	AP2/ERF and B3 domain-containing transcription repressor RAV2	LOC_Os05g47650	B3 DNA binding domain containing protein
TraesCS3B02G584500	-2.81022	6.96339e-05	0.00769479	Down	AT3G13790	CWINV1	Beta-fructofuranosidase%2C insoluble isoenzyme CWINV1	LOC_Os01g73580	glycosyl hydrolases
TraesCS2D02G281100	-2.82031	7.39392e-06	0.00167594	Down	AT1G67340		F-box protein At1g67340	LOC_Os04g31610	OsFBO3 - F-box and other domain containing protein
TraesCS4A02G003800	-2.82547	0.000364049	0.0228129	Down	AT2G37560	ORC2	Origin of replication complex subunit 2	LOC_Os03g08640	ORC2 - Putative origin recognition complex subunit 2
TraesCS2B02G007300	-2.82774	0.000197683	0.0153271	Down	AT1G03670		ankyrin repeat family protein	LOC_Os11g14570	expressed protein
TraesCS2A02G412600	-2.84393	0.000333784	0.0215281	Down	AT5G47500	PME68	Probable pectinesterase 68	LOC_Os04g46740	pectinesterase
TraesCS6B02G252200	-2.8637	7.14597e-09	7.35927e-06	Down	AT1G34020		Nucleotide-sugar transporter family protein	LOC_Os05g12490	transporter-related
TraesCS1D02G189900	-2.88007	0.000158237	0.0132115	Down	AT1G10360	GSTU18	Glutathione S-transferase U18	LOC_Os10g38160	glutathione S-transferase
TraesCS6D02G060800	-2.88141	8.78674e-06	0.0018835	Down				LOC_Os02g15160	OsFBX40 - F-box domain containing protein
TraesCS4D02G204200	-2.88719	0.000650209	0.0328724	Down	AT2G37420		ATP binding microtubule motor family protein	LOC_Os03g17164	kinesin-related protein
TraesCS1A02G289800	-2.88737	5.09816e-05	0.0062407	Down				LOC_Os05g38940	expressed protein
TraesCS2D02G209600	-2.89342	0.00114528	0.0469339	Down	AT4G21440	ATMYB102	MYB-like 102	LOC_Os07g37210	MYB family transcription factor
TraesCS2B02G108900	-2.89872	0.000438554	0.0254182	Down	AT2G47480		Protein of unknown function (DUF3511)	LOC_Os07g49020	expressed protein
TraesCSU02G093300	-2.90803	0.000107118	0.0102722	Down	AT3G55700	UGT76F1	UDP-glycosyltransferase 76F1	LOC_Os11g25454	cytokinin-N-glucosyltransferase 1
TraesCS3D02G544700	-2.92156	0.000237582	0.0173688	Down	AT2G22560	NET2D	Protein NETWORKED 2D	LOC_Os01g74510	KIP1
TraesCS2B02G073500	-2.93346	0.000244435	0.0176307	Down	AT1G28120		Ubiquitin thioesterase otubain-like	LOC_Os08g42540	ubiquitin thioesterase otubain-like
TraesCS1A02G051800	-2.94351	0.00101847	0.0435058	Down	AT2G37330	ALS3	Protein ALUMINUM SENSITIVE 3	LOC_Os05g02750	ABC transporter
TraesCS1D02G087300	-2.94529	0.000760898	0.0362455	Down	AT1G06650		1-aminocyclopropane-1-carboxylate oxidase homolog 3	LOC_Os03g48430	1-aminocyclopropane-1-carboxylate oxidase homolog 4
TraesCS3A02G072900	-2.95015	0.000239965	0.0174621	Down	AT2G19130		G-type lectin S-receptor-like serine/threonine-protein kinase At2g19130	LOC_Os04g42740	serine/threonine-protein kinase receptor precursor
TraesCS5B02G041200	-2.95183	0.000356755	0.0224443	Down	AT1G64760		Glucan endo-1%2C3-beta-glucosidase 8	LOC_Os03g57880	glucan endo-1
TraesCS4A02G073300	-2.95317	0.000250164	0.0178749	Down	AT1G14720	XTH28	Probable xyloglucan endotransglucosylase/hydrolase protein 28	LOC_Os03g13570	glycosyl hydrolases family 16
TraesCS5D02G197000	-2.95847	0.000225169	0.0167456	Down	AT1G13580	LAG13	LAG1 longevity assurance homolog 3	LOC_Os02g37080	ASC1
TraesCS5D02G565300	-2.97063	0.000315386	0.0207944	Down	AT3G05020	ACP1	Acyl carrier protein 1%2C chloroplastic	LOC_Os03g63930	acyl carrier protein
TraesCS4D02G208800	-2.98266	0.000188401	0.0148505	Down	AT5G02230		Haloacid dehalogenase-like hydrolase (HAD) superfamily protein	LOC_Os03g16670	haloacid dehalogenase-like hydrolase family protein
TraesCS6D02G053000	-2.99801	9.43146e-05	0.00942609	Down	AT2G37920	emb1513	copper ion transmembrane transporters	LOC_Os02g35620	expressed protein
TraesCS2A02G422900	-2.99972	0.000162505	0.0134349	Down	AT5G50900		ARM repeat superfamily protein	LOC_Os11g31590	armadillo
TraesCS5B02G194100	-3.01221	0.000369148	0.0229544	Down	AT5G10190		Major facilitator superfamily protein	LOC_Os09g20490	transporter
TraesCS1A02G284500	-3.01471	0.000264355	0.018491	Down	AT3G46550	FLA4	Fasciclin-like arabinogalactan protein 4	LOC_Os05g38500	fasciclin-like arabinogalactan protein
TraesCS1B02G415100	-3.02086	0.001019	0.0435089	Down	AT1G28380	NSL1	MACPF domain-containing protein NSL1	LOC_Os05g48360	membrane attack complex component/perforin/complement C9
TraesCS4B02G171000	-3.04886	3.75164e-05	0.00507768	Down	AT5G15180	PER56	Peroxidase 56	LOC_Os03g36560	peroxidase precursor
TraesCS4D02G147300	-3.04922	0.0002163	0.0163213	Down	AT2G47870	GRXC12	Putative glutaredoxin-C12	LOC_Os11g43520	OsGrx_C17 - glutaredoxin subgroup III
TraesCS5D02G452000	-3.0568	4.51027e-05	0.00577473	Down	AT2G30620		Histone H1.2	LOC_Os03g58470	retrotransposon protein
TraesCS7D02G111800	-3.06512	2.41071e-07	0.000132794	Down	AT5G45910		GDSL esterase/lipase At5g45910	LOC_Os06g06290	GDSL-like lipase/acylhydrolase
TraesCS7D02G365200	-3.07236	0.000980218	0.0424848	Down	AT4G29230	anac075	NAC domain containing protein 75	LOC_Os06g36480	no apical meristem protein
TraesCS4A02G109000	-3.08731	0.000233737	0.0171938	Down	AT3G08510	PLC2	Phosphoinositide phospholipase C 2	LOC_Os07g49330	phospholipase C
TraesCS4B02G360700	-3.09046	0.000961923	0.0419951	Down	AT2G46580	PPOX2	Pyridoxine/pyridoxamine 5'-phosphate oxidase 2	LOC_Os03g02450	pyridoxamine 5'-phosphate oxidase family protein
TraesCS4D02G106900	-3.09233	0.00124634	0.0493053	Down	AT3G47570		Probable LRR receptor-like serine/threonine-protein kinase At3g47570	LOC_Os11g07140	receptor kinase
TraesCS7A02G321800	-3.09883	0.000123728	0.0112936	Down
TraesCS6D02G005300	-3.10475	0.000409372	0.0244691	Down	AT3G07040	RPM1	Disease resistance protein RPM1	LOC_Os11g37880	stripe rust resistance protein Yr10
TraesCS6D02G010400	-3.10482	9.62496e-05	0.00951264	Down
TraesCS2A02G373000	-3.1083	4.48573e-05	0.00575887	Down	AT4G28250	EXPB3	Expansin-B3	LOC_Os02g42650	expansin precursor
TraesCS5B02G408700	-3.11097	0.000860943	0.0391415	Down	AT3G50800		unknown protein%3B FUNCTIONS IN: molecular_function unknown%3B INVOLVED IN: N-terminal protein myristoylation%3B LOCATED IN: cellular_component unknown%3B BEST Arabidopsis thaliana protein match is: unknown protein (TAIR:AT5G66580.1)%3B Has 249 Blast hits to /.../oteins in 14 species: Archae - 0%3B Bacteria - 0%3B Metazoa - 0%3B Fungi - 0%3B Plants - 249%3B Viruses - 0%3B Other Eukaryotes - 0 (so…	LOC_Os07g03120	expressed protein
TraesCS1D02G223200	-3.11644	1.99804e-05	0.0032705	Down	AT2G45050	GATA2	GATA transcription factor 2	LOC_Os10g40810	GATA zinc finger domain containing protein
TraesCS5A02G306100	-3.11908	0.000469047	0.0264683	Down	AT1G01180		S-adenosyl-L-methionine-dependent methyltransferases superfamily protein	LOC_Os09g34320	expressed protein
TraesCS6D02G357600	-3.12292	0.000820669	0.0378465	Down	AT2G29570	PCNA2	Proliferating cell nuclear antigen 2	LOC_Os02g56130	PCNA - Putative DNA replicative polymerase clamp
TraesCS7B02G397000	-3.137	0.000247713	0.0177667	Down	AT5G17980		C2 calcium/lipid-binding plant phosphoribosyltransferase family protein	LOC_Os05g30750	anthranilate phosphoribosyltransferase
TraesCS6B02G093900	-3.16533	0.000617683	0.0317198	Down	AT4G38680	CSP2	Cold shock protein 2	LOC_Os02g02870	glycine-rich protein 2
TraesCS2B02G357200	-3.1663	0.000634528	0.0322527	Down	AT3G48270	CYP71A26	Cytochrome P450 71A26	LOC_Os04g40470	cytochrome P450
TraesCS2A02G410300	-3.18425	0.0012692	0.0499401	Down	AT2G29730	UGT71D1	UDP-glycosyltransferase 71D1	LOC_Os04g46980	cis-zeatin O-glucosyltransferase
TraesCS1B02G363000	-3.19896	5.80926e-05	0.00684493	Down	AT2G32730	RPN2A	26S proteasome non-ATPase regulatory subunit 1 homolog A	LOC_Os08g12820	proteasome/cyclosome repeat containing protein
TraesCS7A02G269600	-3.20903	0.00018978	0.0149276	Down	AT5G52060	BAG1	BAG family molecular chaperone regulator 1	LOC_Os08g43270	BAG domain-containing protein
TraesCS2D02G064900	-3.22374	2.37658e-06	0.000735908	Down	AT4G39330	CAD9	Probable cinnamyl alcohol dehydrogenase 9	LOC_Os04g15920	dehydrogenase
TraesCS2D02G433600	-3.22419	0.000238243	0.0174037	Down	AT5G13140		Pollen Ole e 1 allergen and extensin family protein	LOC_Os12g28770	POEI19 - Pollen Ole e I allergen and extensin family protein precursor
TraesCS3B02G217100	-3.23086	6.47452e-06	0.00150352	Down	AT1G69560	MYB105	myb domain protein 105	LOC_Os01g16810	MYB family transcription factor
TraesCS3D02G227200	-3.23575	3.8577e-05	0.00518442	Down	AT3G24520	HSFC1	Heat stress transcription factor C-1	LOC_Os01g43590	HSF-type DNA-binding domain containing protein
TraesCS3B02G145200	-3.23667	0.00100208	0.0430776	Down	AT2G36800	UGT73C5	UDP-glycosyltransferase 73C5	LOC_Os10g09990	cytokinin-O-glucosyltransferase 3
TraesCS4A02G052400	-3.23777	0.000548358	0.0293198	Down	AT2G03350		Protein of unknown function%2C DUF538	LOC_Os03g11210	DUF538 domain containing protein
TraesCS7A02G075300	-3.24134	0.000835586	0.0382456	Down	AT1G09650		F-box/LRR-repeat/kelch-repeat protein At1g09650	LOC_Os04g11790	OsFBX120 - F-box domain containing protein
TraesCS7A02G276000	-3.24379	0.000703286	0.034543	Down	AT4G35250		NAD(P)-binding Rossmann-fold superfamily protein	LOC_Os08g44000	uncharacterized protein ycf39
TraesCS7A02G367900	-3.24632	0.00050979	0.0280491	Down	AT5G62550		unknown protein%3B FUNCTIONS IN: molecular_function unknown%3B INVOLVED IN: biological_process unknown%3B LOCATED IN: plasma membrane%3B EXPRESSED IN: 17 plant structures%3B EXPRESSED DURING: 9 growth stages%3B Has 14949 Blast hits to 9947 proteins in 971 speci /.../chae - 43%3B Bacteria - 3248%3B Metazoa - 4424%3B Fungi - 1542%3B Plants - 562%3B Viruses - 55%3B Other Eukaryotes - 5075 (source: N…	LOC_Os06g38960	expressed protein
TraesCS3B02G374100	-3.25412	0.000505737	0.0279397	Down	AT1G06840		Probable LRR receptor-like serine/threonine-protein kinase At1g06840	LOC_Os05g40270	expressed protein
TraesCS2A02G145800	-3.25981	0.0011767	0.047563	Down	AT3G21240	4CL2	4-coumarate--CoA ligase 2	LOC_Os08g34790	AMP-binding domain containing protein
TraesCS6A02G040400	-3.26615	0.000386606	0.023619	Down	AT5G22880	H2B	Histone H2B.10	LOC_Os01g05610	Core histone H2A/H2B/H3/H4 domain containing protein
TraesCS3A02G484400	-3.27142	0.00091696	0.0406015	Down	AT1G68090	ANN5	Annexin D5	LOC_Os09g23160	annexin
TraesCSU02G146200	-3.2741	1.50709e-05	0.00272502	Down	AT4G33490		Eukaryotic aspartyl protease family protein	LOC_Os11g08100	eukaryotic aspartyl protease domain containing protein
TraesCS4A02G033500	-3.28073	0.00010017	0.00979434	Down	AT3G27200		Cupredoxin superfamily protein	LOC_Os09g39940	plastocyanin-like domain containing protein
TraesCS6B02G002300	-3.2826	4.147e-05	0.00547231	Down	AT1G21230	WAK5	Wall-associated receptor kinase 5	LOC_Os10g09620	OsWAK108 - OsWAK receptor-like protein kinase
TraesCS2B02G241700	-3.28388	0.000566931	0.0298567	Down	AT4G23180	CRK10	Cysteine-rich receptor-like protein kinase 10	LOC_Os07g35370	TKL_IRAK_DUF26-lc.15 - DUF26 kinases have homology to DUF26 containing loci
TraesCS1A02G089600	-3.29024	0.00115476	0.0470574	Down	AT1G77330		1-aminocyclopropane-1-carboxylate oxidase 5	LOC_Os05g05680	1-aminocyclopropane-1-carboxylate oxidase
TraesCS4D02G335100	-3.2908	1.77139e-05	0.00300237	Down	AT5G46050	NPF5.2	Protein NRT1/ PTR FAMILY 5.2	LOC_Os03g04570	peptide transporter PTR3-A
TraesCS7A02G438500	-3.29528	4.37029e-05	0.00567215	Down	AT5G02560	HTA12	Probable histone H2A.4	LOC_Os05g02300	Core histone H2A/H2B/H3/H4 domain containing protein
TraesCS7D02G079700	-3.30081	0.000731772	0.0354824	Down	AT4G35160		O-methyltransferase family protein	LOC_Os11g20090	O-methyltransferase
TraesCS7D02G121400	-3.31562	0.000270329	0.0187501	Down	AT1G45688		unknown protein%3B FUNCTIONS IN: molecular_function unknown%3B INVOLVED IN: biological_process unknown%3B LOCATED IN: plasma membrane%3B EXPRESSED IN: 22 plant structures%3B EXPRESSED DURING: 13 growth stages%3B BEST Arabidopsis thaliana protein match is: unkno /.../tein (TAIR:AT5G42860.1)%3B Has 35333 Blast hits to 34131 proteins in 2444 species: Archae - 798%3B Bacteria - 22429%3B Metazoa - 974…	LOC_Os06g06780	harpin-induced protein
TraesCS7A02G366100	-3.31881	0.000253042	0.0180178	Down
TraesCS6B02G347400	-3.33827	7.21453e-05	0.00784528	Down	AT4G08950	EXO	Protein EXORDIUM	LOC_Os02g51970	phosphate-induced protein 1 conserved region domain containing protein
TraesCS5B02G263600	-3.39027	0.000820151	0.0378465	Down	AT3G57785		unknown protein%3B BEST Arabidopsis thaliana protein match is: unknown protein (TAIR:AT2G42310.1)%3B Has 121 Blast hits to 121 proteins in 51 species: Archae - 0%3B Bacteria - 0%3B Metazoa - 4%3B Fungi - 48%3B Plants - 67%3B Viruses - 0%3B Other Eukaryotes - 2 (sou /.../CBI BLink).	LOC_Os09g31260	expressed protein
TraesCS5A02G110300	-3.41327	0.000752706	0.0361125	Down	AT4G03520	ATHM2	Thioredoxin M2%2C chloroplastic	LOC_Os12g08730	thioredoxin
TraesCS7A02G345200	-3.42489	6.05987e-05	0.00707079	Down	AT2G38300		myb-like HTH transcriptional regulator family protein	LOC_Os06g35140	MYB family transcription factor
TraesCS7A02G533800	-3.4292	7.58167e-05	0.00807353	Down	AT1G75820	CLV1	Receptor protein kinase CLAVATA1	LOC_Os03g56270	receptor protein kinase CLAVATA1 precursor
TraesCS4D02G246300	-3.43501	0.0010272	0.0437408	Down	AT5G61000	RPA1D	Replication protein A 70 kDa DNA-binding subunit D	LOC_Os03g11540	RPA1B - Putative single-stranded DNA binding complex subunit 1
TraesCS5A02G543700	-3.4442	0.000154278	0.0130421	Down	AT5G39110	GLP6	Germin-like protein subfamily 1 member 14	LOC_Os08g08990	Cupin domain containing protein
TraesCS1D02G103500	-3.46553	0.000421629	0.0247814	Down	AT2G37040	PAL1	Phenylalanine ammonia-lyase 1	LOC_Os04g43800	phenylalanine ammonia-lyase
TraesCS5A02G384600	-3.47284	0.000114423	0.0107512	Down	AT5G11460		Protein of unknown function (DUF581)	LOC_Os03g53520	expressed protein
TraesCS2A02G210100	-3.47673	0.000757929	0.0362106	Down	AT5G16910	CSLD2	Cellulose synthase-like protein D2	LOC_Os07g36630	CSLF8 - cellulose synthase-like family F; beta1
TraesCS3A02G177700	-3.49056	8.20812e-08	5.63541e-05	Down	AT1G55550		P-loop containing nucleoside triphosphate hydrolases superfamily protein	LOC_Os01g15540	kinesin motor domain containing protein
TraesCS3B02G508500	-3.50314	1.05801e-05	0.00214652	Down	AT1G06620		1-aminocyclopropane-1-carboxylate oxidase homolog 1	LOC_Os04g10350	1-aminocyclopropane-1-carboxylate oxidase homolog 2
TraesCS5A02G234200	-3.50429	3.16145e-06	0.000899062	Down	AT1G05010	ACO4	1-aminocyclopropane-1-carboxylate oxidase 4	LOC_Os09g27820	1-aminocyclopropane-1-carboxylate oxidase protein
TraesCS5B02G485400	-3.54083	0.000124809	0.0113594	Down	AT3G11900	ANT1	Amino acid transporter ANT1	LOC_Os03g60260	ANT1
TraesCS2D02G294900	-3.54331	0.00082991	0.0380952	Down	AT5G59030	COPT1	Copper transporter 1	LOC_Os04g33900	ctr copper transporter family protein
TraesCS2B02G210100	-3.54723	2.29127e-05	0.00357642	Down	AT3G49420		Got1/Sft2-like vescicle transport protein family	LOC_Os03g11100	vesicle transport protein GOT1B
TraesCS6A02G028700	-3.56184	5.59353e-06	0.00135541	Down	AT3G10080		Germin-like protein subfamily 3 member 2	LOC_Os02g32980	Cupin domain containing protein
TraesCS3D02G341700	-3.56342	0.000764022	0.0363304	Down	AT3G56110	PRA1B1	PRA1 family protein B1	LOC_Os05g39670	prenylated rab acceptor
TraesCS1B02G299300	-3.56361	0.000527708	0.0287346	Down				LOC_Os05g38940	expressed protein
TraesCS3B02G508900	-3.56545	0.000234404	0.0172295	Down	AT5G49610		F-box protein At5g49610	LOC_Os04g11660	OsFBX119 - F-box domain containing protein
TraesCS6A02G334200	-3.57012	3.90227e-14	2.84403e-10	Down	AT4G25000	AMY1	Alpha-amylase 1	LOC_Os09g28420	alpha-amylase precursor
TraesCS4B02G384000	-3.59014	0.000492632	0.0274075	Down	AT4G35160		O-methyltransferase family protein	LOC_Os10g02880	O-methyltransferase
TraesCS1B02G173400	-3.6054	0.00037611	0.0231978	Down	AT2G28315		Nucleotide/sugar transporter family protein	LOC_Os10g33920	transporter-related
TraesCS6D02G012600	-3.60821	6.48319e-05	0.00733879	Down	AT3G46730	RPP13L3	Putative disease resistance RPP13-like protein 3	LOC_Os11g37870	stripe rust resistance protein Yr10
TraesCS1A02G380700	-3.61359	0.000127289	0.0115188	Down	AT5G38110	ASF1B	Histone chaperone ASF1B	LOC_Os05g48030	anti-silencing protein
TraesCS3D02G539800	-3.61802	0.000689915	0.034098	Down	AT2G39500		unknown protein%3B FUNCTIONS IN: molecular_function unknown%3B INVOLVED IN: biological_process unknown%3B LOCATED IN: endomembrane system%3B EXPRESSED IN: 21 plant structures%3B EXPRESSED DURING: 12 growth stages%3B Has 16 Blast hits to 16 proteins in 8 species /.../ae - 0%3B Bacteria - 0%3B Metazoa - 0%3B Fungi - 0%3B Plants - 16%3B Viruses - 0%3B Other Eukaryotes - 0 (source: NCBI BLink).
TraesCS3B02G196500	-3.62147	4.69368e-05	0.00592167	Down	AT2G27490	COAE	Dephospho-CoA kinase	LOC_Os01g25880	dephospho-CoA kinase
TraesCS7B02G154600	-3.6295	8.89568e-05	0.00901423	Down	AT3G25030		RING/U-box superfamily protein	LOC_Os08g41520	zinc finger
TraesCS4A02G128500	-3.63432	5.6797e-06	0.00137278	Down	AT3G56500		serine-rich protein-related	LOC_Os03g20600	expressed protein
TraesCS4D02G292400	-3.63991	0.00046217	0.0262365	Down	AT5G21920	YLMG2	YGGT family protein	LOC_Os03g08080	YGGT family protein
TraesCS6A02G316600	-3.64081	5.3611e-07	0.000235723	Down	AT4G08950	EXO	Protein EXORDIUM	LOC_Os02g52040	phosphate-induced protein 1 conserved region domain containing protein
TraesCS7A02G497900	-3.64554	0.000165896	0.0135734	Down	AT5G57685	GDU3	Protein GLUTAMINE DUMPER 3	LOC_Os06g44420	GDU1
TraesCS1A02G045000	-3.65396	0.00108809	0.0455155	Down	AT3G57230	AGL16	Agamous-like MADS-box protein AGL16	LOC_Os02g36924	OsMADS27 - MADS-box family gene with MIKCc type-box
TraesCS6D02G214100	-3.68106	1.52408e-05	0.00275049	Down	AT1G65730	YSL7	Probable metal-nicotianamine transporter YSL7	LOC_Os04g44300	transposon protein
TraesCS6A02G229000	-3.68389	9.31829e-06	0.00197069	Down	AT4G06536		SPla/RYanodine receptor (SPRY) domain-containing protein	LOC_Os02g40110	expressed protein
TraesCS3B02G088700	-3.68803	0.0012529	0.0495003	Down	AT2G26170	CYP711A1	Cytochrome P450 711A1	LOC_Os01g50580	cytochrome P450
TraesCS4B02G367300	-3.7028	0.000663563	0.033219	Down	AT4G00150	SCL6	Scarecrow-like protein 6	LOC_Os10g40390	scarecrow
TraesCS2B02G519500	-3.70442	0.000764896	0.0363445	Down	AT5G46330	FLS2	LRR receptor-like serine/threonine-protein kinase FLS2	LOC_Os11g47030	receptor protein kinase
TraesCS3B02G012100	-3.7147	0.000877489	0.0395689	Down				LOC_Os01g02150	sulfated surface glycoprotein 185 precursor
TraesCS2D02G107200	-3.72192	1.13597e-08	1.08715e-05	Down	AT2G38370		WEB family protein At2g38370	LOC_Os03g22040	expressed protein
TraesCS5D02G493100	-3.72379	0.00115392	0.0470436	Down	AT5G02450	RPL36C	60S ribosomal protein L36-3	LOC_Os01g62350	60S ribosomal protein L36-2
TraesCS3B02G515500	-3.72423	7.72306e-05	0.00819482	Down	AT1G03230		Eukaryotic aspartyl protease family protein	LOC_Os01g71090	xylanase inhibitor
TraesCS4D02G337600	-3.73182	0.000711945	0.0348059	Down	AT5G48890		C2H2-like zinc finger protein	LOC_Os07g05900	ZOS7-02 - C2H2 zinc finger protein
TraesCS5D02G311700	-3.74206	0.00122649	0.0488874	Down	AT5G48370		Thioesterase/thiol ester dehydrase-isomerase superfamily protein	LOC_Os09g34190	acyl-coenzyme A thioesterase 10
TraesCS5B02G269100	-3.74873	8.062e-06	0.00178052	Down	AT2G33590		NAD(P)-binding Rossmann-fold superfamily protein	LOC_Os09g31514	dihydroflavonol-4-reductase
TraesCS6B02G293500	-3.78443	7.48205e-05	0.00803181	Down	AT1G32170	XTH30	Probable xyloglucan endotransglucosylase/hydrolase protein 30	LOC_Os02g46910	glycosyl hydrolases family 16
TraesCS5D02G206200	-3.78534	2.28447e-08	1.98572e-05	Down	AT1G70210	CYCD1-1	Cyclin-D1-1	LOC_Os09g21450	cyclin
TraesCS3D02G520800	-3.78931	0.000377044	0.0232121	Down	AT2G07707	YMF19	ATP synthase protein YMF19	LOC_Os12g34018	ATP synthase protein YMF19
TraesCS2A02G275600	-3.8283	0.000394259	0.0239298	Down	AT3G07340	BHLH62	Transcription factor bHLH62	LOC_Os04g28280	BEE 3
TraesCS1D02G052000	-3.85585	0.000186823	0.0147753	Down	AT3G53510	ABCG20	ABC transporter G family member 20	LOC_Os05g02890	white-brown complex homolog protein 16
TraesCS5A02G349400	-3.85758	5.65347e-05	0.00669904	Down	AT2G45250		Integral membrane protein hemolysin-III homolog	LOC_Os09g37700	proteophosphoglycan ppg4
TraesCS1B02G076100	-3.8585	0.000130463	0.0116722	Down	AT1G21270	WAK2	Wall-associated receptor kinase 2	LOC_Os10g07556	wall-associated receptor kinase-like 22 precursor
TraesCS6B02G047800	-3.86245	0.000163069	0.0134349	Down	AT3G27890	NQR	NADPH:quinone oxidoreductase	LOC_Os01g72460	NADPH quinone oxidoreductase
TraesCS3A02G100000	-3.86344	4.49947e-05	0.0057687	Down	AT2G30170		Probable protein phosphatase 2C 26	LOC_Os01g07090	5-azacytidine resistance protein azr1
TraesCS3B02G241700	-3.88216	0.000313836	0.0207152	Down				LOC_Os01g40650	expressed protein
TraesCS5B02G436900	-3.8831	4.66985e-05	0.0059151	Down	AT2G32030		Acyl-CoA N-acyltransferases (NAT) superfamily protein	LOC_Os03g58020	acetyltransferase
TraesCS6A02G316900	-3.88712	0.000335631	0.0215736	Down	AT4G08950	EXO	Protein EXORDIUM	LOC_Os02g51970	phosphate-induced protein 1 conserved region domain containing protein
TraesCS4D02G361800	-3.89324	1.86784e-05	0.00312668	Down
TraesCS3D02G285900	-3.90715	5.34079e-06	0.00131187	Down	AT4G15450		Senescence/dehydration-associated protein-related	LOC_Os01g52480	senescence-associated protein
TraesCS3D02G112000	-3.90785	1.0816e-07	7.01898e-05	Down	AT2G42840	PDF1	Protodermal factor 1	LOC_Os02g13660	meiosis 5
TraesCS3D02G052300	-3.91571	1.49572e-05	0.00271446	Down	AT1G68840	RAV2	AP2/ERF and B3 domain-containing transcription repressor RAV2	LOC_Os01g04800	B3 DNA binding domain containing protein
TraesCS2D02G502400	-3.91617	0.000790016	0.0370059	Down	AT5G47770	FPS1	Farnesyl pyrophosphate synthase 1%2C mitochondrial	LOC_Os04g56230	polyprenyl synthetase
TraesCS2B02G569200	-3.92744	0.00115228	0.0470374	Down	AT1G01490		Heavy metal transport/detoxification superfamily protein	LOC_Os04g57200	heavy metal transport/detoxification protein
TraesCS2B02G328700	-3.93987	0.000266496	0.0185539	Down	AT4G02600	MLO1	MLO-like protein 1	LOC_Os04g36680	MLO domain containing protein
TraesCS1D02G142000	-3.94667	1.02575e-05	0.00211733	Down	AT5G03530	RABC2A	Ras-related protein RABC2a	LOC_Os10g31830	ras-related protein
TraesCS2A02G394700	-3.94829	0.000855928	0.0389775	Down	AT2G46870	NGA1	B3 domain-containing transcription factor NGA1	LOC_Os02g45850	B3 DNA binding domain containing protein
TraesCS7B02G162800	-3.96535	0.00102996	0.043819	Down	AT4G35540		zinc ion binding%3Btranscription regulators	LOC_Os08g42020	zinc ion binding protein
TraesCS6B02G081900	-3.96571	0.000177498	0.0142398	Down	AT1G07660		Histone H4	LOC_Os05g39050	Core histone H2A/H2B/H3/H4 domain containing protein
TraesCS6A02G306200	-3.96914	7.69066e-06	0.00172958	Down	AT1G26945	PRE6	Transcription factor PRE6	LOC_Os02g51320	helix-loop-helix DNA-binding domain containing protein
TraesCS2A02G248800	-3.98152	2.27375e-09	2.95107e-06	Down	AT2G35860	FLA16	Fasciclin-like arabinogalactan protein 16	LOC_Os07g06680	fasciclin domain containing protein
TraesCS2D02G132500	-3.98916	1.19223e-06	0.000434457	Down	AT3G54400		Eukaryotic aspartyl protease family protein	LOC_Os07g46480	eukaryotic aspartyl protease domain containing protein
TraesCS6A02G240500	-3.99799	0.000163053	0.0134349	Down	AT3G50790		esterase/lipase/thioesterase family protein	LOC_Os02g43340	hydrolase
TraesCS1A02G117700	-4.00095	8.46561e-06	0.00183964	Down	AT2G36800	UGT73C5	UDP-glycosyltransferase 73C5	LOC_Os05g08480	cytokinin-O-glucosyltransferase 1
TraesCS5A02G040100	-4.00674	0.00061081	0.0315206	Down	AT1G64760		Glucan endo-1%2C3-beta-glucosidase 8	LOC_Os03g57880	glucan endo-1
TraesCS3B02G466300	-4.01754	0.000143271	0.0123854	Down	AT4G19970		CONTAINS InterPro DOMAIN/s: Nucleotide-diphospho-sugar transferase%2C predicted (InterPro:IPR005069)%3B BEST Arabidopsis thaliana protein match is: Nucleotide-diphospho-sugar transferase family protein (TAIR:AT5G44820.1)%3B Has 801 Blast hits to 466 prote /.../ 35 species: Archae - 0%3B Bacteria - 0%3B Metazoa - 2%3B Fungi - 0%3B Plants - 750%3B Viruses - 0%3B Other Eukaryotes - 49 (source: NCBI …	LOC_Os01g69200	regulatory protein
TraesCS5B02G056500	-4.01868	0.000798485	0.0372649	Down				LOC_Os12g14220	expressed protein
TraesCS4A02G096500	-4.02624	0.000644309	0.0326972	Down	AT5G02230		Haloacid dehalogenase-like hydrolase (HAD) superfamily protein	LOC_Os03g16670	haloacid dehalogenase-like hydrolase family protein
TraesCS3A02G388900	-4.0319	0.00119781	0.0482107	Down
TraesCS3D02G149300	-4.03529	0.0011038	0.0459695	Down	AT2G34960	CAT5	Cationic amino acid transporter 5	LOC_Os01g11160	amino acid permease family protein
TraesCS6D02G223300	-4.04101	0.000519058	0.0283614	Down	AT5G47070		Probable receptor-like protein kinase At5g47070	LOC_Os02g43430	protein kinase domain containing protein
TraesCS5B02G409000	-4.04511	0.000535052	0.0289669	Down	AT3G50800		unknown protein%3B FUNCTIONS IN: molecular_function unknown%3B INVOLVED IN: N-terminal protein myristoylation%3B LOCATED IN: cellular_component unknown%3B BEST Arabidopsis thaliana protein match is: unknown protein (TAIR:AT5G66580.1)%3B Has 249 Blast hits to /.../oteins in 14 species: Archae - 0%3B Bacteria - 0%3B Metazoa - 0%3B Fungi - 0%3B Plants - 249%3B Viruses - 0%3B Other Eukaryotes - 0 (so…	LOC_Os07g03120	expressed protein
TraesCS6B02G200400	-4.04622	0.000245242	0.0176429	Down	AT4G26790		GDSL esterase/lipase At4g26790	LOC_Os02g09620	GDSL-like lipase/acylhydrolase
TraesCS2D02G004200	-4.05532	0.00111221	0.0461374	Down	AT1G75710		C2H2-like zinc finger protein	LOC_Os04g02510	ZOS4-01 - C2H2 zinc finger protein
TraesCS2B02G150900	-4.06388	2.86811e-05	0.00418065	Down	AT5G13810		Glutaredoxin family protein	LOC_Os07g46570	glutaredoxin
TraesCS5A02G073500	-4.07247	7.57053e-08	5.31317e-05	Down	AT3G07040	RPM1	Disease resistance protein RPM1	LOC_Os08g42670	resistance protein
TraesCS1D02G116700	-4.07529	3.73314e-05	0.00507768	Down	AT4G00240	PLDBETA2	Phospholipase D beta 2	LOC_Os09g25390	phospholipase D
TraesCS2B02G427000	-4.08198	0.000908142	0.0403667	Down	AT1G22360	UGT85A2	UDP-glycosyltransferase 85A2	LOC_Os07g30369	indole-3-acetate beta-glucosyltransferase
TraesCS2A02G330200	-4.08391	5.48766e-09	6.04574e-06	Down	AT5G55480	GDPDL4	Glycerophosphodiester phosphodiesterase GDPDL4	LOC_Os04g39610	glycerophosphoryl diester phosphodiesterase family protein
TraesCS3D02G068100	-4.09071	5.03663e-05	0.00619741	Down	AT3G46730	RPP13L3	Putative disease resistance RPP13-like protein 3	LOC_Os11g45050	NBS-LRR disease resistance protein
TraesCS2D02G381000	-4.09289	4.01483e-06	0.00107599	Down	AT4G21760	BGLU47	Beta-glucosidase 47	LOC_Os04g43390	Os4bglu16 - monolignol beta-glucoside homologue
TraesCS5A02G236700	-4.0941	0.000500186	0.0277102	Down	AT3G48850	MPT2	Mitochondrial phosphate carrier protein 2%2C mitochondrial	LOC_Os04g37600	phosphate carrier protein
TraesCS4A02G012100	-4.09958	0.000990876	0.0427901	Down				LOC_Os03g07920	expressed protein
TraesCS5D02G412100	-4.13283	0.000740131	0.0357947	Down	AT2G45490	AUR3	Serine/threonine-protein kinase Aurora-3	LOC_Os03g55620	CAMK_CAMK_like_Aur_like.2 - CAMK includes calcium/calmodulin depedent protein kinases
TraesCS1D02G437300	-4.13852	6.65913e-07	0.000277941	Down	AT1G53250		unknown protein%3B BEST Arabidopsis thaliana protein match is: unknown protein (TAIR:AT1G53800.1)%3B Has 11909 Blast hits to 7704 proteins in 757 species: Archae - 51%3B Bacteria - 1338%3B Metazoa - 4550%3B Fungi - 987%3B Plants - 464%3B Viruses - 24%3B Other Eukar /.../- 4495 (source: NCBI BLink).	LOC_Os10g12354	endonuclease
TraesCS4D02G039900	-4.15518	5.30374e-06	0.00131187	Down	AT5G22090		Protein FAF-like%2C chloroplastic	LOC_Os03g49830	expressed protein
TraesCS5B02G215900	-4.17229	0.000900513	0.0401884	Down	AT5G57500		Galactosyltransferase family protein	LOC_Os09g26300	hypro1
TraesCS4B02G330800	-4.1756	5.48478e-05	0.00657799	Down	AT2G30870	GSTF10	Glutathione S-transferase F10	LOC_Os03g04220	glutathione S-transferase
TraesCS6A02G314300	-4.17985	2.99778e-06	0.000868587	Down	AT1G35710		Probable leucine-rich repeat receptor-like protein kinase At1g35710	LOC_Os10g02990	leucine-rich repeat receptor-like protein kinase 1
TraesCS6A02G100300	-4.18023	7.17965e-06	0.0016431	Down	AT1G54570		Acyltransferase-like protein At1g54570%2C chloroplastic	LOC_Os01g26039	expressed protein
TraesCS7D02G490300	-4.18481	0.000130053	0.0116722	Down	AT4G30850	HHP2	Heptahelical transmembrane protein 2	LOC_Os06g44250	haemolysin-III
TraesCS2D02G594400	-4.19947	0.000659896	0.0331333	Down	AT5G44640	BGLU13	Beta-glucosidase 13	LOC_Os04g39880	Os4bglu12 - beta-glucosidase
TraesCS1D02G173300	-4.2238	0.00065248	0.0329355	Down	AT1G02816		Protein of unknown function%2C DUF538	LOC_Os12g09620	expressed protein
TraesCS7A02G254800	-4.24068	0.000108405	0.0103674	Down				LOC_Os09g32350	expressed protein
TraesCS4A02G073800	-4.24383	3.70376e-05	0.00504916	Down	AT1G14700	PAP3	Purple acid phosphatase 3	LOC_Os03g13540	Ser/Thr protein phosphatase family protein
TraesCS7D02G067300	-4.2452	9.65963e-05	0.00951264	Down	AT1G31770	ABCG14	ABC transporter G family member 14	LOC_Os08g07010	ABC-2 type transporter domain containing protein
TraesCS7D02G233400	-4.26771	0.000280313	0.0192314	Down	AT1G24330	PUB6	U-box domain-containing protein 6	LOC_Os06g28590	bg55
TraesCS6D02G033000	-4.2736	5.16732e-06	0.00129178	Down	AT4G10550		Subtilase family protein	LOC_Os01g58290	OsSub9 - Putative Subtilisin homologue
TraesCS4D02G193900	-4.29404	3.70947e-07	0.000179625	Down	AT5G05550		sequence-specific DNA binding transcription factors	LOC_Os03g18330	transcription factor like protein
TraesCS3A02G267200	-4.29425	0.00114382	0.0469145	Down				LOC_Os09g06620	OsFBX307 - F-box domain containing protein
TraesCS5B02G489200	-4.2957	0.000646451	0.0327358	Down	AT5G50900		ARM repeat superfamily protein	LOC_Os11g31590	armadillo
TraesCS6B02G292900	-4.29593	7.27305e-06	0.00165691	Down	AT4G17720		RNA-binding (RRM/RBD/RNP motifs) family protein	LOC_Os04g53330	RNA recognition motif containing protein
TraesCS2D02G389900	-4.30804	9.42447e-12	3.30715e-08	Down	AT1G02150		Pentatricopeptide repeat-containing protein At1g02150	LOC_Os04g46010	PPR repeat domain containing protein
TraesCS5A02G281900	-4.31044	0.000265832	0.0185331	Down	AT2G38870		Serine protease inhibitor%2C potato inhibitor I-type family protein	LOC_Os12g25090	expressed protein
TraesCS2A02G359600	-4.32483	0.000167408	0.0136617	Down	AT3G06080	TBL10	Protein trichome birefringence-like 10	LOC_Os12g05080	PMR5
TraesCS1D02G157700	-4.34834	0.000947638	0.041541	Down				LOC_Os05g16140	expressed protein
TraesCS1D02G242200	-4.37969	2.7728e-06	0.000822981	Down	AT3G14470	RPPL1	Putative disease resistance RPP13-like protein 1	LOC_Os11g28950	pollen signalling protein with adenylyl cyclase activity
TraesCS2B02G419600	-4.38931	0.00125144	0.0494654	Down	AT4G11660	HSFB2B	Heat stress transcription factor B-2b	LOC_Os04g48030	heat stress transcription factor B-1
TraesCS5B02G356000	-4.39484	0.00119618	0.0481718	Down	AT3G17730	anac057	NAC domain containing protein 57	LOC_Os09g38000	no apical meristem protein
TraesCS6B02G038800	-4.39702	5.0059e-05	0.0061731	Down	AT3G07040	RPM1	Disease resistance protein RPM1	LOC_Os08g42670	resistance protein
TraesCS4A02G274600	-4.40759	7.34662e-05	0.00791881	Down				LOC_Os03g49485	expressed protein
TraesCS5A02G253000	-4.4101	0.000580805	0.0303357	Down	AT3G13180		NOL1/NOP2/sun family protein / antitermination NusB domain-containing protein	LOC_Os09g30100	NOL1/NOP2/sun family protein
TraesCS2B02G612200	-4.41764	0.000868691	0.0393239	Down	AT2G13610	ABCG5	ABC transporter G family member 5	LOC_Os01g42900	ABC-2 type transporter domain containing protein
TraesCS5A02G244000	-4.44639	3.73632e-05	0.00507768	Down	AT1G71050	HIPP20	Heavy metal transport/detoxification superfamily protein	LOC_Os01g32330	heavy metal-associated domain containing protein
TraesCS1A02G042700	-4.48072	0.00109936	0.0458831	Down	AT3G46130	MYB48	Transcription factor MYB48	LOC_Os12g37970	MYB family transcription factor
TraesCS7D02G145100	-4.48747	8.20492e-06	0.00180367	Down	AT1G58190	RLP9	receptor like protein 9	LOC_Os06g08154	receptor-like protein kinase 5 precursor
TraesCS5B02G025300	-4.48995	0.00123363	0.0490482	Down	AT2G26730		Probable inactive receptor kinase At2g26730	LOC_Os01g42294	inactive receptor kinase At2g26730 precursor
TraesCS1D02G188500	-4.49696	0.000956842	0.0418159	Down	AT1G08250	ADT6	Arogenate dehydratase/prephenate dehydratase 6%2C chloroplastic	LOC_Os10g37980	prephenate dehydratase domain containing protein
TraesCS3A02G084900	-4.50524	1.31284e-06	0.000465194	Down	AT3G23760		FUNCTIONS IN: molecular_function unknown%3B INVOLVED IN: biological_process unknown%3B LOCATED IN: vacuole%3B EXPRESSED IN: 20 plant structures%3B EXPRESSED DURING: 13 growth stages%3B BEST Arabidopsis thaliana protein match is: transferases%2C transferring gly /.../groups (TAIR:AT4G14100.1)%3B Has 108 Blast hits to 104 proteins in 19 species: Archae - 0%3B Bacteria - 0%3B Metazoa - 8%3B Fungi - …	LOC_Os07g29240	expressed protein
TraesCS4D02G014600	-4.50819	0.000391393	0.0238169	Down	AT1G31320	LBD4	LOB domain-containing protein 4	LOC_Os03g45750	DUF260 domain containing protein
TraesCS6D02G150000	-4.51018	0.000662593	0.033219	Down				LOC_Os04g18790	OsFBX126 - F-box domain containing protein
TraesCS4A02G274900	-4.51468	2.13842e-05	0.00343708	Down	AT3G06470		GNS1/SUR4 membrane protein family	LOC_Os03g49480	elongation of fatty acids protein 2
TraesCS1A02G337500	-4.52674	0.000466611	0.0263791	Down				LOC_Os04g16722	uncharacterized protein ycf68
TraesCS3A02G020600	-4.52939	4.74117e-05	0.00595765	Down	AT2G20370	KAM1	Xyloglucan galactosyltransferase KATAMARI1	LOC_Os10g32080	xyloglucan galactosyltransferase KATAMARI1
TraesCS3A02G201800	-4.54679	2.40927e-05	0.00370347	Down	AT1G70550		Protein of Unknown Function (DUF239)	LOC_Os01g36660	carboxyl-terminal peptidase
TraesCS2D02G577000	-4.5472	4.19107e-05	0.00552277	Down	AT1G10940	SRK2A	Serine/threonine-protein kinase SRK2A	LOC_Os04g59450	CAMK_CAMK_like.28 - CAMK includes calcium/calmodulin depedent protein kinases
TraesCS5A02G254500	-4.55878	2.59057e-06	0.00079176	Down	AT3G23960		Putative F-box protein At3g23960	LOC_Os09g30180	OsFBX331 - F-box domain containing protein
TraesCS2D02G305300	-4.56257	0.000752532	0.0361125	Down	AT5G64530	ANAC104	xylem NAC domain 1	LOC_Os04g35660	no apical meristem protein
TraesCS2B02G532900	-4.56278	2.90742e-07	0.000150243	Down	AT2G18890		Protein kinase superfamily protein	LOC_Os04g56060	protein kinase domain containing protein
TraesCS2A02G366400	-4.56971	4.56754e-06	0.00119216	Down	AT3G28410		Putative F-box/LRR-repeat protein At3g28410	LOC_Os07g06900	OsFBLD3 - F-box
TraesCS1D02G165000	-4.58225	0.000618352	0.031737	Down	AT5G17540		HXXXD-type acyl-transferase family protein	LOC_Os10g35950	transferase family protein
TraesCS5B02G300300	-4.58309	1.14351e-05	0.00226658	Down	AT2G22500	PUMP5	Mitochondrial uncoupling protein 5	LOC_Os08g37370	mitochondrial carrier protein
TraesCS2D02G030900	-4.58421	0.000760332	0.0362455	Down	AT1G12550	HPR3	Glyoxylate/hydroxypyruvate reductase HPR3	LOC_Os04g01674	erythronate-4-phosphate dehydrogenase domain containing protein
TraesCS6B02G179400	-4.58816	0.000169186	0.0137476	Down	AT4G30310		FGGY family of carbohydrate kinase	LOC_Os02g08130	FGGY family of carbohydrate kinases
TraesCS4B02G339600	-4.59852	0.000119212	0.0110517	Down	AT1G19450		Sugar transporter ERD6-like 4	LOC_Os05g49270	transporter family protein
TraesCS7D02G360100	-4.59965	0.000162965	0.0134349	Down	AT2G36870	XTH32	Probable xyloglucan endotransglucosylase/hydrolase protein 32	LOC_Os07g29750	glycosyl hydrolases family 16
TraesCS5B02G464700	-4.60382	0.000669874	0.033457	Down
TraesCS4A02G258400	-4.60456	7.24548e-07	0.000297178	Down	AT5G42770		Maf-like protein	LOC_Os03g51479	maf
TraesCS3D02G219400	-4.62236	7.13961e-06	0.00164187	Down	AT5G63350		unknown protein%3B BEST Arabidopsis thaliana protein match is: unknown protein (TAIR:AT3G48510.1)%3B Has 103 Blast hits to 102 proteins in 13 species: Archae - 0%3B Bacteria - 0%3B Metazoa - 2%3B Fungi - 0%3B Plants - 101%3B Viruses - 0%3B Other Eukaryotes - 0 (sou /.../CBI BLink).	LOC_Os12g13910	expressed protein
TraesCS4B02G162300	-4.62852	0.00100741	0.0431697	Down	AT3G11110	ATL66	RING-H2 finger protein ATL66	LOC_Os05g39260	zinc finger
TraesCS3A02G290000	-4.63129	3.22769e-05	0.00452382	Down	AT4G18760	AtRLP51	receptor like protein 51	LOC_Os01g54630	leucine rich repeat family protein
TraesCS4A02G173800	-4.63929	0.000661836	0.0332131	Down	AT5G24090	CHIB1	Acidic endochitinase	LOC_Os11g47580	glycosyl hydrolase
TraesCS4D02G219400	-4.63936	0.000739814	0.0357947	Down	AT1G13340		Regulator of Vps4 activity in the MVB pathway protein	LOC_Os03g15230	DUF292 domain containing protein
TraesCS1A02G218100	-4.66095	0.00117182	0.0474061	Down	AT5G07580	ERF106	Integrase-type DNA-binding superfamily protein	LOC_Os10g41330	AP2 domain containing protein
TraesCS2A02G265000	-4.66467	0.000657824	0.0330748	Down				LOC_Os08g34410	expressed protein
TraesCS3D02G268900	-4.67453	5.73705e-05	0.00677759	Down	AT4G21700		Protein of unknown function (DUF2921)	LOC_Os01g48620	expressed protein
TraesCS2A02G326300	-4.67864	0.000292006	0.0196774	Down	AT1G25580	NAC008	NAC domain-containing protein 8	LOC_Os02g38130	no apical meristem protein
TraesCS2A02G353000	-4.7018	0.000932742	0.041061	Down	AT1G65540		LETM1-like protein	LOC_Os04g41950	calcium-binding mitochondrial protein anon-60Da
TraesCS2B02G569600	-4.70421	0.00114238	0.0469145	Down	AT1G01490		Heavy metal transport/detoxification superfamily protein	LOC_Os04g57200	heavy metal transport/detoxification protein
TraesCS5A02G049400	-4.70645	0.000897594	0.0401305	Down	AT4G27470	RMA3	E3 ubiquitin-protein ligase RMA3	LOC_Os02g42690	zinc finger
TraesCS2D02G136100	-4.71606	0.000500413	0.0277102	Down	AT5G13720		Uncharacterised protein family (UPF0114)	LOC_Os07g46330	uncharacterized UPF0114 domain containing protein
TraesCS7D02G312200	-4.7195	0.00045578	0.0259828	Down	AT1G12420	ACR8	ACT domain-containing protein ACR8	LOC_Os03g14370	ACT domain containing protein
TraesCS3D02G368900	-4.73011	0.000544185	0.0292152	Down	AT5G24090	CHIB1	Acidic endochitinase	LOC_Os01g64110	glycosyl hydrolase
TraesCS1A02G135900	-4.73531	0.000190009	0.0149276	Down	AT1G75900	EXL3	GDSL esterase/lipase EXL3	LOC_Os10g30290	GDSL-like lipase/acylhydrolase
TraesCS7B02G362800	-4.7372	0.000492983	0.0274105	Down	AT3G47110		Putative receptor-like protein kinase At3g47110	LOC_Os10g22860	receptor kinase
TraesCS5D02G540400	-4.73795	0.000887532	0.0398343	Down				LOC_Os07g03110	OsFBX213 - F-box domain containing protein
TraesCS2B02G177300	-4.74033	0.000224752	0.0167409	Down	AT2G46960	CYP709B1	cytochrome P450%2C family 709%2C subfamily B%2C polypeptide 1	LOC_Os07g44130	cytochrome P450 72A1
TraesCS3B02G098600	-4.74459	0.000602022	0.0311349	Down	AT4G36220	CYP84A1	Cytochrome P450 84A1	LOC_Os10g36848	cytochrome P450
TraesCS2A02G259900	-4.74662	6.47486e-08	4.75103e-05	Down	AT5G42510	DIR1	Dirigent protein 1	LOC_Os07g01660	dirigent
TraesCS3A02G358900	-4.76447	3.53224e-06	0.000984311	Down	AT3G46550	FLA4	Fasciclin-like arabinogalactan protein 4	LOC_Os01g62380	fasciclin-like arabinogalactan protein
TraesCS7D02G270100	-4.76451	1.60593e-05	0.00284404	Down	AT5G52060	BAG1	BAG family molecular chaperone regulator 1	LOC_Os08g43270	BAG domain-containing protein
TraesCS7A02G523900	-4.76454	8.62205e-05	0.0088314	Down	AT2G23300		Leucine-rich repeat protein kinase family protein	LOC_Os06g43170	transposon protein
TraesCS2D02G204400	-4.76503	4.67765e-10	7.91409e-07	Down	AT3G53260	PAL2	Phenylalanine ammonia-lyase 2	LOC_Os04g43800	phenylalanine ammonia-lyase
TraesCS6B02G247800	-4.76805	2.11779e-06	0.000680176	Down	AT2G31800		Integrin-linked protein kinase family	LOC_Os02g39560	non-receptor tyrosine kinase spore lysis A
TraesCS7B02G485000	-4.78319	0.000751509	0.0361125	Down	AT1G33800	GXM3	Glucuronoxylan 4-O-methyltransferase 3	LOC_Os12g10320	plant-specific domain TIGR01627 family protein
TraesCSU02G127000	-4.80312	0.000984895	0.0426095	Down	AT1G60670		Protein of unknown function (DUF3755)	LOC_Os02g42020	expressed protein
TraesCS5B02G468800	-4.80418	6.14923e-06	0.0014464	Down	AT5G19855		Chaperonin-like RbcX protein	LOC_Os03g59320	expressed protein
TraesCS3D02G388700	-4.81009	9.62304e-05	0.00951264	Down	AT1G05805	BHLH128	Transcription factor bHLH128	LOC_Os01g67480	helix-loop-helix DNA-binding domain containing protein
TraesCS2B02G459000	-4.81562	0.000187337	0.0147861	Down	AT3G22370	AOX1A	Ubiquinol oxidase 1a%2C mitochondrial	LOC_Os04g51160	transposon protein
TraesCS2A02G054200	-4.81906	0.000138316	0.0120783	Down	AT1G05675	UGT74E1	UDP-glycosyltransferase 74E1	LOC_Os04g12970	UDP-glucoronosyl/UDP-glucosyl transferase
TraesCS5B02G140100	-4.82658	0.000146486	0.0125829	Down	AT3G19740		P-loop containing nucleoside triphosphate hydrolases superfamily protein	LOC_Os02g51400	AAA family ATPase
TraesCS1A02G439800	-4.82936	0.000534041	0.0289669	Down	AT5G56850		unknown protein%3B EXPRESSED IN: 21 plant structures%3B EXPRESSED DURING: 13 growth stages%3B Has 35333 Blast hits to 34131 proteins in 2444 species: Archae - 798%3B Bacteria - 22429%3B Metazoa - 974%3B Fungi - 991%3B Plants - 531%3B Viruses - 0%3B Other Eukaryotes - /.../(source: NCBI BLink).	LOC_Os05g14270	expressed protein
TraesCS5B02G136100	-4.83657	0.00045695	0.0260338	Down	AT3G56630	CYP94D2	cytochrome P450%2C family 94%2C subfamily D%2C polypeptide 2	LOC_Os11g04290	cytochrome P450
TraesCS1A02G208900	-4.84408	0.000260942	0.0183773	Down	AT5G23870	PAE9	Pectin acetylesterase 9	LOC_Os10g40290	pectinacetylesterase domain containing protein
TraesCS1A02G285400	-4.84587	0.000163282	0.0134408	Down	AT5G59750	RIBA3	Monofunctional riboflavin biosynthesis protein RIBA 3%2C chloroplastic	LOC_Os05g38570	riboflavin biosynthesis protein ribAB
TraesCS5B02G133200	-4.85212	8.55731e-05	0.00881718	Down	AT5G61330		rRNA processing protein-related	LOC_Os01g34200	AATF
TraesCS5D02G494200	-4.85301	0.000789563	0.0370059	Down	AT5G18980		ARM repeat superfamily protein	LOC_Os07g45490	expressed protein
TraesCS2A02G490700	-4.85552	0.000930544	0.0409881	Down	AT5G48930	HST	Shikimate O-hydroxycinnamoyltransferase	LOC_Os04g56910	transferase family protein
TraesCS4A02G106800	-4.86753	4.92824e-05	0.00611166	Down	AT3G54770	ARP1	Probable RNA-binding protein ARP1	LOC_Os03g17760	RNA recognition motif containing protein
TraesCS4A02G342600	-4.87974	0.00059767	0.0310093	Down	AT2G44580		zinc ion binding	LOC_Os05g02810	protein binding protein
TraesCS2B02G068900	-4.88528	0.00050437	0.0278823	Down	AT3G45070	SOT5	Cytosolic sulfotransferase 5	LOC_Os09g08190	sulfotransferase domain containing protein
TraesCS6A02G098500	-4.89119	0.000729048	0.0353865	Down	AT3G27170	CLC-B	Chloride channel protein CLC-b	LOC_Os02g35190	chloride channel protein
TraesCS7A02G485300	-4.89931	0.000273557	0.0189048	Down	AT5G45680	FKBP13	Peptidyl-prolyl cis-trans isomerase FKBP13%2C chloroplastic	LOC_Os06g45340	peptidyl-prolyl cis-trans isomerase
TraesCS4A02G350700	-4.90021	0.00126291	0.0498149	Down	AT2G15490	UGT73B4	UDP-glycosyltransferase 73B4	LOC_Os01g45110	anthocyanin 3-O-beta-glucosyltransferase
TraesCS2B02G173400	-4.90043	0.000995148	0.0429163	Down	AT4G11290	PER39	Peroxidase 39	LOC_Os07g44550	peroxidase precursor
TraesCS7A02G372300	-4.90258	0.000897944	0.0401305	Down	AT2G16280	KCS9	3-ketoacyl-CoA synthase 9	LOC_Os05g49290	3-ketoacyl-CoA synthase
TraesCS2A02G412300	-4.90725	0.000441091	0.0254952	Down	AT5G09640	SCPL19	Serine carboxypeptidase-like 19	LOC_Os11g24510	OsSCP56 - Putative Serine Carboxypeptidase homologue
TraesCS3B02G242400	-4.91509	0.000368264	0.0229399	Down	AT1G34000	OHP2	one-helix protein 2	LOC_Os01g40710	high light inducible protein
TraesCSU02G124700	-4.91546	0.000612206	0.0315754	Down	AT1G13080	CYP71B2	Cytochrome P450 71B2	LOC_Os03g63310	cytochrome P450 71E1
TraesCS3B02G361500	-4.9226	5.12948e-07	0.000229244	Down	AT5G15100	PIN5	Putative auxin efflux carrier component 5	LOC_Os01g58860	auxin efflux carrier component
TraesCS3A02G142600	-4.92345	0.00033315	0.0215164	Down				LOC_Os11g34230	expressed protein
TraesCS3A02G446800	-4.92487	0.000650537	0.0328724	Down	AT4G14580	CIPK4	CBL-interacting serine/threonine-protein kinase 4	LOC_Os03g43440	CAMK_KIN1/SNF1/Nim1_like.17 - CAMK includes calcium/calmodulin depedent protein kinases
TraesCS4B02G330600	-4.92725	0.000787832	0.0370012	Down	AT5G17540		HXXXD-type acyl-transferase family protein	LOC_Os07g23960	transferase family protein
TraesCS4A02G059200	-4.92812	0.00034335	0.0218622	Down	AT1G58340	ZF14	MATE efflux family protein	LOC_Os03g12790	MATE efflux family protein
TraesCS6D02G274900	-4.93111	0.000489224	0.0273121	Down	AT1G66230	MYB20	myb domain protein 20	LOC_Os02g49986	MYB family transcription factor
TraesCS2A02G233200	-4.93114	3.56119e-06	0.000989466	Down
TraesCS1A02G097000	-4.93352	0.000553644	0.0294529	Down	AT4G23890	ndhS	NAD(P)H-quinone oxidoreductase subunit S%2C chloroplastic	LOC_Os07g09800	expressed protein
TraesCS5A02G292000	-4.93984	0.00090784	0.0403667	Down	AT1G54570		Acyltransferase-like protein At1g54570%2C chloroplastic	LOC_Os09g33530	expressed protein
TraesCS3A02G181400	-4.94025	0.000515792	0.0282155	Down	AT1G74470	CHLP	Geranylgeranyl diphosphate reductase%2C chloroplastic	LOC_Os01g16020	FAD binding domain containing protein
TraesCS6A02G216100	-4.94725	0.00110374	0.0459695	Down	AT3G54420	ATEP3	homolog of carrot EP3-3 chitinase	LOC_Os02g39330	CHIT1 - Chitinase family protein precursor
TraesCS3D02G540100	-4.97189	6.25461e-07	0.00026598	Down	AT3G53620	PPA4	Soluble inorganic pyrophosphatase 4	LOC_Os01g74350	soluble inorganic pyrophosphatase
TraesCS3A02G152700	-4.97587	0.00117153	0.0474061	Down	AT3G48280	CYP71A25	Cytochrome P450 71A25	LOC_Os01g12750	cytochrome P450
TraesCS4A02G043500	-4.97887	1.5512e-05	0.00277827	Down	AT5G10180	SULTR2%3B1	Sulfate transporter 2.1	LOC_Os03g09940	sulfate transporter
TraesCS1D02G233500	-4.9797	6.81904e-05	0.00759197	Down	AT4G01410		Late embryogenesis abundant (LEA) hydroxyproline-rich glycoprotein family	LOC_Os05g30490	harpin-induced protein 1 domain containing protein
TraesCS7A02G200200	-4.98193	4.22983e-06	0.00112257	Down	AT3G02850	SKOR	Potassium channel SKOR	LOC_Os06g14030	potassium channel SKOR
TraesCS2B02G359600	-4.98455	0.000765484	0.0363541	Down	AT3G48360	BT2	BTB/POZ and TAZ domain-containing protein 2	LOC_Os04g40630	BTBZ4 - Bric-a-Brac
TraesCS3B02G285700	-4.98527	0.000747979	0.0360468	Down	AT1G23390		F-box/kelch-repeat protein At1g23390	LOC_Os01g50840	expressed protein
TraesCS2A02G101000	-4.98744	0.000944673	0.041437	Down	AT5G61430	NAC100	NAC domain-containing protein 100	LOC_Os07g48550	no apical meristem protein
TraesCS5A02G263700	-4.99346	0.00103316	0.0438989	Down	AT3G12220	SCPL16	Serine carboxypeptidase-like 16	LOC_Os03g52040	OsSCP19 - Putative Serine Carboxypeptidase homologue
TraesCS4B02G081500	-4.99358	0.000634326	0.0322527	Down	AT1G51700	DOF1.7	Dof zinc finger protein DOF1.7	LOC_Os03g42200	dof zinc finger domain containing protein
TraesCS7A02G111500	-4.99662	0.00115616	0.0470742	Down	AT3G61220	SDR1	(+)-neomenthol dehydrogenase	LOC_Os04g44950	short-chain dehydrogenase/reductase
TraesCS7D02G092500	-5.00011	0.000407339	0.0244691	Down	AT1G18860	WRKY61	Probable WRKY transcription factor 61	LOC_Os06g05380	WRKY73
TraesCS1D02G180100	-5.00334	0.00022969	0.0169885	Down	ATCG00070	PSBK	Photosystem II reaction center protein K	LOC_Os02g24642	photosystem II reaction center protein K precursor
TraesCS2B02G181100	-5.01736	3.07864e-05	0.00436659	Down	AT1G52320		unknown protein%3B FUNCTIONS IN: molecular_function unknown%3B INVOLVED IN: N-terminal protein myristoylation%3B LOCATED IN: plasma membrane%3B EXPRESSED IN: 23 plant structures%3B EXPRESSED DURING: 14 growth stages%3B CONTAINS InterPro DOMAIN/s: Protein of unk /.../unction DUF632 (InterPro:IPR006867)%3B BEST Arabidopsis thaliana protein match is: Protein of unknown function (DUF630 and DUF632) (…	LOC_Os07g11070	DUF630/DUF632 domains containing protein
TraesCS7B02G370400	-5.02757	0.000769951	0.0364932	Down	AT1G56150	SAUR71	Auxin-responsive protein SAUR71	LOC_Os02g07110	OsSAUR6 - Auxin-responsive SAUR gene family member
TraesCS7D02G401000	-5.02823	0.000655443	0.033046	Down	AT5G17540		HXXXD-type acyl-transferase family protein	LOC_Os06g49660	transferase family protein
TraesCS4A02G109100	-5.03429	0.000124552	0.0113469	Down	AT3G08920	STR10	Rhodanese-like domain-containing protein 10	LOC_Os03g18020	rhodanese-like family protein
TraesCS1D02G214300	-5.05092	0.00072242	0.0351368	Down	AT1G12110	NPF6.3	Protein NRT1/ PTR FAMILY 6.3	LOC_Os10g40600	peptide transporter PTR2
TraesCS6B02G438800	-5.055	0.000578217	0.0302339	Down	AT1G31800	CYP97A3	Protein LUTEIN DEFICIENT 5%2C chloroplastic	LOC_Os02g57290	cytochrome P450
TraesCS7A02G141400	-5.0561	0.00109631	0.0458035	Down	AT5G34940	AtGUS3	Heparanase-like protein 3	LOC_Os06g08090	heparanase-like protein precursor
TraesCS1D02G024500	-5.0596	0.000656414	0.033046	Down	AT5G46330	FLS2	LRR receptor-like serine/threonine-protein kinase FLS2	LOC_Os12g42520	receptor kinase
TraesCS4D02G213900	-5.0612	0.000815184	0.0377864	Down	AT3G09085		Protein of unknown function (DUF962)	LOC_Os03g15910	membrane protein
TraesCSU02G080800	-5.07187	0.00127086	0.0499401	Down	AT5G57500		Galactosyltransferase family protein	LOC_Os02g54370	hypro1
TraesCS5A02G214000	-5.07783	0.000663064	0.033219	Down	AT3G02910		Putative gamma-glutamylcyclotransferase At3g02910	LOC_Os11g04420	AIG2-like family domain containing protein
TraesCS1A02G340300	-5.08202	6.27721e-05	0.00720897	Down	AT1G21270	WAK2	Wall-associated receptor kinase 2	LOC_Os09g38840	OsWAK90 - OsWAK receptor-like protein kinase
TraesCS4D02G100400	-5.08432	0.000430664	0.0251099	Down	AT3G28410		Putative F-box/LRR-repeat protein At3g28410	LOC_Os11g09970	OsFBX411 - F-box domain containing protein
TraesCS1A02G396200	-5.08782	7.48537e-05	0.00803181	Down	AT5G57530	XTH12	Probable xyloglucan endotransglucosylase/hydrolase protein 12	LOC_Os08g13920	glycosyl hydrolases family 16
TraesCS5A02G354300	-5.09571	0.000673238	0.0335542	Down	AT5G65980		Auxin efflux carrier family protein	LOC_Os09g38130	auxin efflux carrier component
TraesCS5D02G392700	-5.09634	0.000974815	0.0423669	Down	AT4G30110	HMA2	Cadmium/zinc-transporting ATPase HMA2	LOC_Os07g12900	cadmium/zinc-transporting ATPase
TraesCS2B02G472200	-5.10678	0.000911274	0.0404518	Down	AT2G29040		Exostosin family protein	LOC_Os12g12290	exostosin family domain containing protein
TraesCS1D02G209800	-5.11266	0.000111175	0.0105123	Down	AT3G09925		Pollen Ole e 1 allergen and extensin family protein	LOC_Os10g39890	POEI31 - Pollen Ole e I allergen and extensin family protein precursor
TraesCS3D02G434200	-5.11754	0.000587845	0.0306022	Down	AT3G62160		HXXXD-type acyl-transferase family protein	LOC_Os01g42870	transferase family protein
TraesCS5D02G067500	-5.11842	9.5738e-05	0.00951264	Down	AT1G78780		pathogenesis-related family protein	LOC_Os01g14590	pathogen-related protein
TraesCS7D02G478500	-5.11941	0.00034521	0.0219417	Down	AT5G17980		C2 calcium/lipid-binding plant phosphoribosyltransferase family protein	LOC_Os05g30750	anthranilate phosphoribosyltransferase
TraesCS1B02G197000	-5.12069	0.000179177	0.014314	Down	AT2G36290		alpha/beta-Hydrolases superfamily protein	LOC_Os10g37710	hydrolase
TraesCS1D02G138400	-5.12073	2.50684e-05	0.00378809	Down	AT5G42190	SKP1B	SKP1-like protein 1B	LOC_Os10g30200	SKP1-like protein 1B
TraesCS7A02G353900	-5.12603	0.000877862	0.0395689	Down	AT4G20840		FAD-binding Berberine family protein	LOC_Os06g35630	reticuline oxidase-like protein precursor
TraesCS6B02G347100	-5.13979	1.18249e-07	7.62149e-05	Down	AT1G35140	EXL1	Protein EXORDIUM-like 1	LOC_Os02g52040	phosphate-induced protein 1 conserved region domain containing protein
TraesCS4B02G046700	-5.15867	6.40814e-05	0.00728866	Down	AT4G37110		Zinc-finger domain of monoamine-oxidase A repressor R1	LOC_Os03g50420	expressed protein
TraesCS4D02G239400	-5.1728	0.00080122	0.0373217	Down	AT1G73500	MKK9	Mitogen-activated protein kinase kinase 9	LOC_Os03g12390	STE_MEK_ste7_MAP2K.6 - STE kinases include homologs to sterile 7
TraesCS4A02G327300	-5.18072	0.000180586	0.0144022	Down	AT3G46730	RPP13L3	Putative disease resistance RPP13-like protein 3	LOC_Os10g04110	MLA6 protein
TraesCS1D02G261800	-5.18474	0.000947919	0.041541	Down	AT2G02450	ANAC034	NAC domain containing protein 35	LOC_Os05g34600	no apical meristem protein
TraesCS4B02G240500	-5.1861	0.000928371	0.0409304	Down	AT2G47010		unknown protein%3B FUNCTIONS IN: molecular_function unknown%3B INVOLVED IN: biological_process unknown%3B LOCATED IN: endomembrane system%3B EXPRESSED IN: 17 plant structures%3B EXPRESSED DURING: 10 growth stages%3B BEST Arabidopsis thaliana protein match is: u /.../ protein (TAIR:AT1G17030.1)%3B Has 72 Blast hits to 72 proteins in 13 species: Archae - 0%3B Bacteria - 0%3B Metazoa - 0%3B Fungi - …	LOC_Os05g19030	expressed protein
TraesCS2D02G049400	-5.19085	3.16848e-05	0.00446761	Down	AT5G08330	TCP21	Transcription factor TCP21	LOC_Os04g11830	TCP family transcription factor
TraesCS7D02G156800	-5.19809	1.97505e-05	0.00325441	Down	AT5G11880	LYSA2	Diaminopimelate decarboxylase 2%2C chloroplastic	LOC_Os09g37120	pyridoxal-dependent decarboxylase protein
TraesCS3A02G255500	-5.20041	0.00113363	0.046638	Down	AT1G29520		AWPM-19-like family protein	LOC_Os01g50440	AWPM-19-like membrane family protein
TraesCS3D02G295000	-5.20216	0.00103259	0.0438989	Down	AT1G06330		Heavy metal transport/detoxification superfamily protein	LOC_Os01g55320	heavy metal-associated domain containing protein
TraesCS5A02G268800	-5.20573	0.000291491	0.0196567	Down	AT2G33590		NAD(P)-binding Rossmann-fold superfamily protein	LOC_Os09g31502	dehydrogenase
TraesCS2A02G188600	-5.21368	0.000253306	0.0180178	Down	AT3G18830	PLT5	Polyol transporter 5	LOC_Os07g39350	transporter family protein
TraesCS3B02G167400	-5.21477	3.49845e-05	0.00482481	Down	AT2G34500	CYP710A1	Cytochrome P450 710A1	LOC_Os01g11340	cytochrome P450
TraesCS3B02G002200	-5.21899	0.000239536	0.0174444	Down	AT1G10585		basic helix-loop-helix (bHLH) DNA-binding superfamily protein	LOC_Os01g01870	helix-loop-helix DNA-binding domain containing protein
TraesCS7D02G356300	-5.22094	0.000814001	0.0377641	Down
TraesCS6D02G144700	-5.23161	0.00100175	0.0430776	Down	AT1G07010		Calcineurin-like metallo-phosphoesterase superfamily protein	LOC_Os10g25430	Ser/Thr protein phosphatase family protein
TraesCS2A02G359800	-5.23564	0.000536048	0.0289888	Down	AT3G50120		Plant protein of unknown function (DUF247)	LOC_Os04g42650	plant protein of unknown function domain containing protein
TraesCS6B02G060200	-5.23835	1.32938e-05	0.00250904	Down	AT1G72640		NAD(P)-binding Rossmann-fold superfamily protein	LOC_Os03g29730	expressed protein
TraesCS2B02G119100	-5.24618	2.57314e-05	0.00385751	Down	AT1G61110	NAC025	NAC transcription factor 25	LOC_Os07g48450	no apical meristem protein
TraesCS6D02G008200	-5.24618	0.000109028	0.0103923	Down	AT5G54160	OMT1	Flavone 3'-O-methyltransferase 1	LOC_Os08g06100	O-methyltransferase
TraesCS6B02G046900	-5.24815	0.000507656	0.0279984	Down	AT3G48690	CXE12	Probable carboxylesterase 12	LOC_Os09g28720	alpha/beta hydrolase fold
TraesCS6A02G335500	-5.25708	3.16255e-05	0.00446761	Down	AT1G22490	BHLH94	Transcription factor bHLH94	LOC_Os08g37730	helix-loop-helix DNA-binding protein
TraesCS5D02G037000	-5.26528	0.000589216	0.0306567	Down	AT3G14470	RPPL1	Putative disease resistance RPP13-like protein 1	LOC_Os12g25170	NB-ARC domain containing disease resistance protein
TraesCS5B02G069700	-5.26817	0.000934796	0.0410844	Down	AT3G18930	ATL65	RING-H2 finger protein ATL65	LOC_Os12g40460	zinc finger
TraesCS4A02G439700	-5.29042	0.000529203	0.0287946	Down	AT5G45480		Protein of unknown function (DUF594)	LOC_Os06g02960	expressed protein
TraesCS3B02G557600	-5.2924	0.000868268	0.0393236	Down	AT1G11950		Transcription factor jumonji (jmjC) domain-containing protein	LOC_Os02g01940	transcription factor jumonji
TraesCS3D02G375500	-5.29461	0.000881896	0.0396941	Down	AT1G22550	NPF5.16	Protein NRT1/ PTR FAMILY 5.16	LOC_Os01g65150	proton-dependent oligopeptide transport
TraesCS2B02G573500	-5.29486	0.000118884	0.0110321	Down	AT4G22300	SOBER1	carboxylesterases	LOC_Os04g57390	acyl-protein thioesterase
TraesCS6A02G093700	-5.31426	0.000471221	0.0265436	Down	AT2G34420	LHB1B2	photosystem II light harvesting complex gene B1B2	LOC_Os01g52240	chlorophyll A-B binding protein
TraesCS2B02G512900	-5.32437	6.18321e-05	0.00714432	Down	AT4G21380	SD18	Receptor-like serine/threonine-protein kinase SD1-8	LOC_Os04g54130	TKL_IRAK_DUF26-ld.1 - DUF26 kinases have homology to DUF26 containing loci
TraesCS7B02G102800	-5.32505	0.000187428	0.0147861	Down	AT1G67780		Zinc-finger domain of monoamine-oxidase A repressor R1 protein	LOC_Os05g23530	expressed protein
TraesCS1A02G370000	-5.33039	4.55464e-07	0.000210674	Down	AT5G60335		Thioesterase superfamily protein	LOC_Os05g09370	kinase
TraesCS7A02G076900	-5.34316	0.000975643	0.0423834	Down
TraesCS2A02G583400	-5.34608	8.12848e-05	0.00848172	Down	AT2G35980	YLS9	Protein YLS9	LOC_Os04g58850	harpin-induced protein 1 domain containing protein
TraesCS5D02G183200	-5.34847	0.000312312	0.0206636	Down	AT5G52220		CONTAINS InterPro DOMAIN/s: Chromosome transmission fidelity protein 8 (InterPro:IPR018607)%3B Has 127 Blast hits to 127 proteins in 63 species: Archae - 0%3B Bacteria - 0%3B Metazoa - 70%3B Fungi - 17%3B Plants - 31%3B Viruses - 0%3B Other Eukaryotes - 9 (source /.../ BLink).	LOC_Os09g12780	expressed protein
TraesCS6B02G364800	-5.35893	4.10863e-08	3.21716e-05	Down	AT4G25000	AMY1	Alpha-amylase 1	LOC_Os09g28420	alpha-amylase precursor
TraesCS3D02G116500	-5.36043	0.000543893	0.0292152	Down	AT4G39490	CYP96A10	cytochrome P450%2C family 96%2C subfamily A%2C polypeptide 10	LOC_Os01g08810	cytochrome P450
TraesCS5D02G075600	-5.36274	0.000479955	0.0268893	Down	AT5G42630	KAN4	Probable transcription factor KAN4	LOC_Os03g55760	MYB family transcription factor
TraesCS7B02G150900	-5.37215	7.8129e-06	0.00173766	Down				LOC_Os09g32350	expressed protein
TraesCS1D02G226700	-5.37521	0.000115341	0.0107985	Down	AT1G35220		unknown protein%3B FUNCTIONS IN: molecular_function unknown%3B INVOLVED IN: biological_process unknown%3B LOCATED IN: cellular_component unknown%3B EXPRESSED IN: 22 plant structures%3B EXPRESSED DURING: 13 growth stages%3B Has 313 Blast hits to 185 proteins in /.../cies: Archae - 0%3B Bacteria - 0%3B Metazoa - 200%3B Fungi - 0%3B Plants - 67%3B Viruses - 0%3B Other Eukaryotes - 46 (source: NCBI B…	LOC_Os05g28690	expressed protein
TraesCS1D02G344800	-5.37739	0.00121915	0.0486767	Down	AT2G46860	PPA3	Soluble inorganic pyrophosphatase 3	LOC_Os10g26600	soluble inorganic pyrophosphatase
TraesCS5B02G549300	-5.38124	0.000215362	0.016288	Down	AT4G19970		CONTAINS InterPro DOMAIN/s: Nucleotide-diphospho-sugar transferase%2C predicted (InterPro:IPR005069)%3B BEST Arabidopsis thaliana protein match is: Nucleotide-diphospho-sugar transferase family protein (TAIR:AT5G44820.1)%3B Has 801 Blast hits to 466 prote /.../ 35 species: Archae - 0%3B Bacteria - 0%3B Metazoa - 2%3B Fungi - 0%3B Plants - 750%3B Viruses - 0%3B Other Eukaryotes - 49 (source: NCBI …	LOC_Os03g63280	regulatory protein
TraesCS4A02G100900	-5.38819	0.000101341	0.00986812	Down	AT2G33290	SUVH2	Histone-lysine N-methyltransferase family member SUVH2	LOC_Os08g45130	histone-lysine N-methyltransferase
TraesCSU02G230500	-5.39399	0.000818523	0.0378325	Down	AT1G18390		Probable serine/threonine-protein kinase At1g18390	LOC_Os01g04470	expressed protein
TraesCS1A02G401800	-5.39477	7.5839e-05	0.00807353	Down	AT1G29860	WRKY71	Probable WRKY transcription factor 71	LOC_Os05g49100	WRKY49
TraesCS4D02G344400	-5.40007	0.000613537	0.0316027	Down				LOC_Os07g02610	expressed protein
TraesCS3A02G428700	-5.40435	0.000106643	0.0102371	Down	AT4G19970		CONTAINS InterPro DOMAIN/s: Nucleotide-diphospho-sugar transferase%2C predicted (InterPro:IPR005069)%3B BEST Arabidopsis thaliana protein match is: Nucleotide-diphospho-sugar transferase family protein (TAIR:AT5G44820.1)%3B Has 801 Blast hits to 466 prote /.../ 35 species: Archae - 0%3B Bacteria - 0%3B Metazoa - 2%3B Fungi - 0%3B Plants - 750%3B Viruses - 0%3B Other Eukaryotes - 49 (source: NCBI …	LOC_Os01g69200	regulatory protein
TraesCS1D02G060600	-5.40456	0.00105387	0.0445191	Down	AT3G10960	AZG1	Adenine/guanine permease AZG1	LOC_Os05g26840	permease domain containing protein
TraesCS5D02G397300	-5.40848	0.000375318	0.023166	Down	AT3G53310	REM20	B3 domain-containing protein REM20	LOC_Os11g09160	B3 DNA binding domain containing protein
TraesCS1D02G371700	-5.40977	0.000655622	0.033046	Down	AT5G26660	MYB86	Transcription factor MYB86	LOC_Os05g46610	myb-like DNA-binding domain containing protein
TraesCS5D02G539600	-5.41472	1.65356e-06	0.000559528	Down				LOC_Os07g23900	OsFBX234 - F-box domain containing protein
TraesCS4A02G022100	-5.42545	0.000858908	0.0390865	Down	AT4G19100	PAM68	Protein PAM68%2C chloroplastic	LOC_Os06g21530	expressed protein
TraesCS5B02G393800	-5.42898	0.000194079	0.0151117	Down	AT3G47000		Glycosyl hydrolase family protein	LOC_Os01g56510	periplasmic beta-glucosidase precursor
TraesCS1B02G311200	-5.43522	0.00113594	0.0467124	Down	AT5G01920	STN8	Serine/threonine-protein kinase STN8%2C chloroplastic	LOC_Os05g40180	serine/threonine-protein kinase stt7
TraesCS5D02G377900	-5.43535	3.36217e-05	0.00466402	Down	AT1G04290		Thioesterase superfamily protein	LOC_Os01g65950	thioesterase family protein
TraesCS4D02G365300	-5.43774	0.000706254	0.0346529	Down	AT1G35710		Probable leucine-rich repeat receptor-like protein kinase At1g35710	LOC_Os10g33080	leucine-rich repeat receptor protein kinase EXS precursor
TraesCS1A02G295300	-5.44803	0.00126674	0.0498987	Down	AT2G38290	AMT2	Ammonium transporter 2	LOC_Os01g61550	ammonium transporter protein
TraesCS4D02G179400	-5.44975	0.000496702	0.0275691	Down				LOC_Os03g20440	VQ domain containing protein
TraesCS2B02G137500	-5.45284	0.000465623	0.0263536	Down	AT3G04710	TPR10	ankyrin repeat family protein	LOC_Os09g03750	ankyrin
TraesCS7D02G465700	-5.45523	3.1211e-06	0.00089339	Down	AT3G14460		Putative disease resistance protein At3g14460	LOC_Os11g47780	pollen signalling protein with adenylyl cyclase activity
TraesCS7D02G037700	-5.46524	0.00042284	0.0247966	Down	AT1G35710		Probable leucine-rich repeat receptor-like protein kinase At1g35710	LOC_Os02g34790	receptor-like protein kinase 5 precursor
TraesCS4D02G198000	-5.46672	0.000168708	0.0137323	Down	AT3G54770	ARP1	Probable RNA-binding protein ARP1	LOC_Os03g17760	RNA recognition motif containing protein
TraesCS6D02G222300	-5.46893	0.000904827	0.0403225	Down	AT4G36250	ALDH3F1	Aldehyde dehydrogenase family 3 member F1	LOC_Os02g43280	aldehyde dehydrogenase
TraesCS2B02G171200	-5.46943	0.000106116	0.0102175	Down	AT3G21240	4CL2	4-coumarate--CoA ligase 2	LOC_Os08g34790	AMP-binding domain containing protein
TraesCS3D02G225000	-5.47426	0.000489926	0.0273121	Down	AT1G62290	APA2	Aspartic proteinase A2	LOC_Os01g44130	aspartic proteinase oryzasin-1 precursor
TraesCS2A02G320000	-5.48017	7.67483e-07	0.000308118	Down	AT3G25980	MAD2	Mitotic spindle checkpoint protein MAD2	LOC_Os04g40940	mitotic spindle checkpoint protein MAD2
TraesCS2B02G463600	-5.48211	0.00017238	0.0138999	Down	AT3G18170		Glycosyltransferase family 61 protein	LOC_Os01g02930	glycosyltransferase protein
TraesCS1D02G427500	-5.49108	0.000274248	0.0189249	Down	AT1G79890		RAD3-like DNA-binding helicase protein	LOC_Os05g13300	helicase
TraesCS7A02G222700	-5.49241	0.000592525	0.030812	Down				LOC_Os12g44130	expressed protein
TraesCS3A02G097800	-5.50218	6.65345e-05	0.00746505	Down	AT3G56170	CAN1	Staphylococcal-like nuclease CAN1	LOC_Os01g07200	staphylococcal nuclease homologue
TraesCS3A02G264200	-5.50555	0.000442859	0.0255537	Down	AT4G15490	UGT84A3	UDP-glycosyltransferase 84A3	LOC_Os01g49240	limonoid UDP-glucosyltransferase
TraesCS6B02G201100	-5.50621	1.48935e-07	9.10388e-05	Down	AT1G80060		Ubiquitin-like superfamily protein	LOC_Os02g09530	expressed protein
TraesCS6B02G215200	-5.51418	0.00106888	0.0450036	Down	AT5G56960	BHLH41	Putative transcription factor bHLH041	LOC_Os02g12820	helix-loop-helix DNA-binding domain containing protein
TraesCS3B02G200200	-5.51523	3.65872e-06	0.00100389	Down	AT3G62020	GLP10	Germin-like protein subfamily 2 member 4	LOC_Os01g14670	Cupin domain containing protein
TraesCS6A02G293400	-5.51838	0.000153027	0.0129704	Down	AT3G18000	NMT1	Phosphoethanolamine N-methyltransferase 1	LOC_Os10g10180	methyltransferase domain containing protein
TraesCS7D02G418700	-5.51958	0.00123494	0.049059	Down	AT4G25810	XTH23	Probable xyloglucan endotransglucosylase/hydrolase protein 23	LOC_Os06g48200	glycosyl hydrolases family 16
TraesCS2A02G483900	-5.52	0.000467156	0.0263931	Down	AT3G20660	2025-10-04	Organic cation/carnitine transporter 4	LOC_Os04g53930	organic cation transporter protein
TraesCS2A02G194900	-5.52417	2.6447e-06	0.00079897	Down	AT3G19540		Protein of unknown function (DUF620)	LOC_Os07g40150	expressed protein
TraesCS4A02G440100	-5.52681	0.000475836	0.0267354	Down				LOC_Os09g39310	expressed protein
TraesCS3B02G585400	-5.52905	2.25197e-05	0.00355587	Down	AT3G54250		GHMP kinase family protein	LOC_Os02g01920	GHMP kinases ATP-binding protein
TraesCS2A02G432500	-5.52983	0.000109306	0.0104083	Down	AT4G29905		unknown protein%3B BEST Arabidopsis thaliana protein match is: unknown protein (TAIR:AT5G57123.1)%3B Has 73 Blast hits to 73 proteins in 13 species: Archae - 0%3B Bacteria - 0%3B Metazoa - 0%3B Fungi - 0%3B Plants - 73%3B Viruses - 0%3B Other Eukaryotes - 0 (source /.../ BLink).	LOC_Os04g51680	expressed protein
TraesCS4B02G294300	-5.53111	8.61186e-05	0.0088314	Down	AT2G05940		Protein kinase superfamily protein	LOC_Os03g08170	protein kinase APK1B
TraesCS2B02G267900	-5.53393	4.05614e-05	0.00536737	Down	AT1G06690		Uncharacterized oxidoreductase At1g06690%2C chloroplastic	LOC_Os07g04990	oxidoreductase
TraesCS1D02G441900	-5.53613	2.31467e-05	0.00359863	Down	AT1G04860	UBP2	Ubiquitin carboxyl-terminal hydrolase 2	LOC_Os11g40450	retrotransposon protein
TraesCS3D02G471400	-5.54398	0.000923058	0.0407523	Down	AT3G21480		BRCT domain-containing DNA repair protein	LOC_Os01g71256	expressed protein
TraesCS7D02G352800	-5.55565	0.000112962	0.0106389	Down	AT4G01730	PAT18	Protein S-acyltransferase 18	LOC_Os12g16210	zinc finger family protein
TraesCS1D02G213300	-5.5645	0.000158118	0.0132115	Down	AT4G12510		Bifunctional inhibitor/lipid-transfer protein/seed storage 2S albumin superfamily protein	LOC_Os10g40530	LTPL146 - Protease inhibitor/seed storage/LTP family protein precursor
TraesCS2B02G311900	-5.56752	3.22971e-06	0.000908018	Down	AT3G52600	CWINV2	Beta-fructofuranosidase%2C insoluble isoenzyme CWINV2	LOC_Os04g33740	glycosyl hydrolases
TraesCSU02G142200	-5.58445	2.26306e-06	0.000714719	Down	AT1G07660		Histone H4	LOC_Os05g39050	Core histone H2A/H2B/H3/H4 domain containing protein
TraesCS3A02G402700	-5.59481	1.39692e-05	0.00262085	Down
TraesCS2B02G145600	-5.59644	0.000748577	0.0360518	Down				LOC_Os07g46800	expressed protein
TraesCS2B02G457000	-5.59823	0.000337176	0.0216304	Down	AT4G19410	PAE7	Pectin acetylesterase 7	LOC_Os04g51340	pectinacetylesterase domain containing protein
TraesCS5A02G521400	-5.60151	0.000573491	0.0300531	Down	AT5G24860	FPF1	Flowering-promoting factor 1	LOC_Os07g47450	flowering promoting factor-like 1
TraesCS3A02G303300	-5.60182	1.72944e-05	0.00296983	Down				LOC_Os01g55720	expressed protein
TraesCS3D02G488500	-5.60194	0.000786149	0.036965	Down	AT2G17080		Arabidopsis protein of unknown function (DUF241)	LOC_Os08g43870	carrier
TraesCS2B02G182900	-5.60347	0.000264829	0.018491	Down	AT2G02990	RNS1	Ribonuclease 1	LOC_Os07g43670	ribonuclease T2 family domain containing protein
TraesCS3A02G108100	-5.61176	6.73412e-05	0.00753283	Down	AT3G16490	IQD26	IQ-domain 26	LOC_Os01g09470	IQ calmodulin-binding motif family protein
TraesCS5B02G064100	-5.62124	5.56473e-05	0.00662356	Down				LOC_Os05g15510	cellulase
TraesCS3A02G456100	-5.63588	0.000154335	0.0130421	Down	AT2G23620	MES1	Methylesterase 1	LOC_Os01g70860	esterase
TraesCS3B02G429600	-5.64131	0.000122503	0.011243	Down	AT2G26730		Probable inactive receptor kinase At2g26730	LOC_Os01g42294	inactive receptor kinase At2g26730 precursor
TraesCS4D02G031700	-5.64745	0.000968358	0.0421636	Down	AT1G18980		Germin-like protein subfamily T member 2	LOC_Os03g48780	Cupin domain containing protein
TraesCS1D02G387400	-5.65079	4.00748e-05	0.00532495	Down				LOC_Os01g57968	expressed protein
TraesCS5B02G132500	-5.65322	0.00054643	0.0292498	Down	AT4G11000		Ankyrin repeat family protein	LOC_Os11g04830	embryogenesis transmembrane protein
TraesCS7A02G432200	-5.65545	0.000129528	0.0116657	Down				LOC_Os02g36350	expressed protein
TraesCS5D02G096200	-5.65732	5.33031e-05	0.00644988	Down	AT1G21270	WAK2	Wall-associated receptor kinase 2	LOC_Os02g41500	OsWAK13 - OsWAK receptor-like protein kinase
TraesCS2D02G060900	-5.67042	2.14647e-05	0.0034411	Down	AT1G65790	SD17	Receptor-like serine/threonine-protein kinase SD1-7	LOC_Os10g12620	protein kinase domain containing protein
TraesCS3A02G290100	-5.6755	0.00092347	0.0407523	Down	AT5G11500		unknown protein%3B CONTAINS InterPro DOMAIN/s: Protein of unknown function DUF814 (InterPro:IPR008532)%3B Has 1807 Blast hits to 1807 proteins in 277 species: Archae - 0%3B Bacteria - 0%3B Metazoa - 736%3B Fungi - 347%3B Plants - 385%3B Viruses - 0%3B Other Eukaryo /.../339 (source: NCBI BLink).	LOC_Os01g54670	coiled-coil domain-containing protein 25
TraesCS5D02G305300	-5.67701	9.66794e-05	0.00951264	Down	AT2G43320		S-adenosyl-L-methionine-dependent methyltransferases superfamily protein	LOC_Os09g33920	expressed protein
TraesCS1D02G203000	-5.68436	0.000189716	0.0149276	Down	AT1G63830		PLAC8 family protein	LOC_Os10g39100	uncharacterized Cys-rich domain containing protein
TraesCS7A02G273800	-5.69032	6.43781e-05	0.00730847	Down	AT2G17080		Arabidopsis protein of unknown function (DUF241)	LOC_Os08g43760	carrier
TraesCS5D02G413000	-5.7132	0.000596727	0.0310093	Down				LOC_Os03g55776	expressed protein
TraesCS3A02G510900	-5.7162	0.00121054	0.0485991	Down	AT1G71695	PER12	Peroxidase 12	LOC_Os01g73170	peroxidase precursor
TraesCS5B02G498700	-5.71807	6.14298e-05	0.0071152	Down	AT3G53960	NPF5.7	Protein NRT1/ PTR FAMILY 5.7	LOC_Os03g60850	peptide transporter PTR2
TraesCS3B02G194100	-5.72094	2.77958e-06	0.000822981	Down				LOC_Os01g13930	expressed protein
TraesCS2D02G377700	-5.7232	0.000409306	0.0244691	Down	AT1G27930		Protein of unknown function (DUF579)	LOC_Os11g29780	plant-specific domain TIGR01627 family protein
TraesCS2D02G576400	-5.72501	0.000211423	0.0160766	Down	AT1G71930	NAC030	NAC domain-containing protein 30	LOC_Os08g01330	no apical meristem protein
TraesCS5B02G243500	-5.74086	0.000309343	0.0205245	Down	AT5G02560	HTA12	Probable histone H2A.4	LOC_Os05g02300	Core histone H2A/H2B/H3/H4 domain containing protein
TraesCS6B02G178500	-5.74095	4.97821e-05	0.00615751	Down	AT2G18670	ATL56	RING-H2 finger protein ATL56	LOC_Os02g08200	zinc finger
TraesCS4A02G142700	-5.74203	0.000619359	0.0317542	Down	AT3G14260		Protein LURP-one-related 11	LOC_Os03g22410	DUF567 domain containing protein
TraesCS4B02G037200	-5.75077	0.00018482	0.0146658	Down	AT3G27640		Transducin/WD40 repeat-like superfamily protein	LOC_Os03g49200	WD domain
TraesCS7A02G329200	-5.75476	0.000626564	0.0319941	Down	AT3G09010		Protein kinase superfamily protein	LOC_Os04g58250	protein kinase
TraesCS6B02G165300	-5.7559	0.000540885	0.0291506	Down	AT3G20570	ENODL9	early nodulin-like protein 9	LOC_Os02g06670	retrotransposon protein
TraesCS3D02G254600	-5.75895	5.74503e-06	0.00138152	Down	AT2G39350	ABCG1	ABC transporter G family member 1	LOC_Os09g23640	ABC-2 type transporter domain containing protein
TraesCS2B02G442500	-5.75939	2.39501e-06	0.000736746	Down	AT5G50900		ARM repeat superfamily protein	LOC_Os11g31590	armadillo
TraesCS2D02G561500	-5.76349	0.000150862	0.0128616	Down	AT5G23390		Plant protein of unknown function (DUF639)	LOC_Os04g58100	expressed protein
TraesCS5B02G273000	-5.7677	0.000156423	0.0131537	Down	AT4G31330		Protein of unknown function%2C DUF599	LOC_Os09g32100	expressed protein
TraesCS7A02G425300	-5.7847	0.000630128	0.0320806	Down				LOC_Os09g32310	expressed protein
TraesCS1D02G081000	-5.78493	0.000426852	0.024939	Down				LOC_Os01g33400	helix-loop-helix DNA-binding domain containing protein
TraesCS7A02G330000	-5.78545	0.000697595	0.0343704	Down	AT1G48100		Polygalacturonase At1g48100	LOC_Os05g20020	polygalacturonase
TraesCS1B02G049900	-5.78787	0.000244103	0.0176279	Down	AT3G14470	RPPL1	Putative disease resistance RPP13-like protein 1	LOC_Os10g04120	powdery mildew resistance protein PM3b
TraesCS6A02G250000	-5.795	0.00109979	0.0458831	Down				LOC_Os02g44100	expressed protein
TraesCS4D02G088500	-5.79756	2.61347e-05	0.00388722	Down	AT1G72180		Leucine-rich receptor-like protein kinase family protein	LOC_Os11g12530	receptor-like protein kinase 5 precursor
TraesCS4B02G055200	-5.8109	0.00104248	0.0441925	Down	AT1G75170		Sec14p-like phosphatidylinositol transfer family protein	LOC_Os03g51430	SEC14 cytosolic factor family protein
TraesCS3B02G007300	-5.8113	1.03199e-05	0.0021174	Down	AT1G21240	WAK3	Wall-associated receptor kinase 3	LOC_Os04g30010	OsWAK45 - OsWAK receptor-like protein kinase
TraesCS2B02G101100	-5.81295	0.00021056	0.0160625	Down				LOC_Os07g49050	expressed protein
TraesCS5D02G560400	-5.82214	4.0364e-05	0.00534871	Down	AT2G16850	PIP2-8	Probable aquaporin PIP2-8	LOC_Os07g26630	aquaporin protein
TraesCS2A02G322100	-5.8284	2.28668e-05	0.00357642	Down	AT5G14360		Ubiquitin-like superfamily protein	LOC_Os02g38410	ubiquitin family protein
TraesCS5D02G549400	-5.82869	0.000171156	0.0138452	Down	AT3G14470	RPPL1	Putative disease resistance RPP13-like protein 1	LOC_Os02g16270	xa1
TraesCS7B02G396800	-5.82888	2.09707e-05	0.00339534	Down	AT5G47920		unknown protein%3B BEST Arabidopsis thaliana protein match is: unknown protein (TAIR:AT5G13880.1)%3B Has 1807 Blast hits to 1807 proteins in 277 species: Archae - 0%3B Bacteria - 0%3B Metazoa - 736%3B Fungi - 347%3B Plants - 385%3B Viruses - 0%3B Other Eukaryotes - /.../source: NCBI BLink).	LOC_Os02g30240	expressed protein
TraesCS2B02G042700	-5.8297	0.000316138	0.020815	Down	AT3G14460		Putative disease resistance protein At3g14460	LOC_Os04g02110	disease resistance protein RGA3
TraesCS4D02G073300	-5.83282	3.17481e-05	0.00446955	Down	AT1G67510		Leucine-rich repeat protein kinase family protein	LOC_Os12g13300	expressed protein
TraesCS2B02G198900	-5.83664	0.000243624	0.0176202	Down	AT2G04039		unknown protein%3B FUNCTIONS IN: molecular_function unknown%3B LOCATED IN: chloroplast%3B EXPRESSED IN: 21 plant structures%3B EXPRESSED DURING: 13 growth stages%3B CONTAINS InterPro DOMAIN/s: Protein of unknown function DUF2996 (InterPro:IPR021374)%3B Has 159 /.../hits to 159 proteins in 52 species: Archae - 0%3B Bacteria - 76%3B Metazoa - 0%3B Fungi - 0%3B Plants - 38%3B Viruses - 0%3B Other Eu…
TraesCS2D02G222200	-5.83892	0.000237151	0.0173506	Down	AT4G23180	CRK10	Cysteine-rich receptor-like protein kinase 10	LOC_Os07g35310	TKL_IRAK_DUF26-lc.12 - DUF26 kinases have homology to DUF26 containing loci
TraesCS2A02G266500	-5.84538	1.21507e-06	0.000437998	Down	AT5G66600		Protein of unknown function%2C DUF547	LOC_Os03g55890	ternary complex factor MIP1
TraesCS2A02G573900	-5.8467	6.30755e-05	0.00722105	Down	AT1G71695	PER12	Peroxidase 12	LOC_Os04g59150	peroxidase precursor
TraesCS7D02G393900	-5.85287	2.60598e-05	0.00388316	Down	AT5G44400		FAD-binding Berberine family protein	LOC_Os06g35630	reticuline oxidase-like protein precursor
TraesCS1D02G294600	-5.86781	0.000108545	0.0103674	Down	AT1G07090	LSH6	Protein LIGHT-DEPENDENT SHORT HYPOCOTYLS 6	LOC_Os05g39500	DUF640 domain containing protein
TraesCS3B02G320500	-5.86985	1.24105e-05	0.00238026	Down	AT4G29130	HXK1	Hexokinase-1	LOC_Os01g52450	hexokinase
TraesCS2D02G554700	-5.87827	0.00107889	0.0452503	Down
TraesCS6B02G280400	-5.88197	0.00121281	0.0486088	Down	AT1G02640	BXL2	Probable beta-D-xylosidase 2	LOC_Os01g19220	beta-D-xylosidase
TraesCS5B02G504400	-5.89274	0.000678745	0.03374	Down	AT1G43770		RING/FYVE/PHD zinc finger superfamily protein	LOC_Os03g30740	expressed protein
TraesCS2D02G375800	-5.89771	1.12284e-05	0.00223496	Down				LOC_Os04g44100	expressed protein
TraesCS3B02G040200	-5.90427	0.000549076	0.0293417	Down	AT1G68480	JAG	Zinc finger protein JAGGED	LOC_Os01g03840	ZOS1-02 - C2H2 zinc finger protein
TraesCS2A02G589900	-5.90521	4.78971e-06	0.0012232	Down	AT3G09010		Protein kinase superfamily protein	LOC_Os04g58250	protein kinase
TraesCS2D02G349800	-5.90796	0.00077307	0.0365131	Down	AT5G25460		Protein of unknown function%2C DUF642	LOC_Os04g41759	expressed protein
TraesCS2B02G577100	-5.91629	0.000327392	0.0212897	Down	AT3G61040	CYP76C7	cytochrome P450%2C family 76%2C subfamily C%2C polypeptide 7	LOC_Os10g08540	cytochrome P450
TraesCS7B02G265200	-5.91751	8.22916e-05	0.00856791	Down	AT5G21105		Plant L-ascorbate oxidase	LOC_Os06g37080	L-ascorbate oxidase precursor
TraesCS7A02G441800	-5.91868	6.56043e-05	0.00739969	Down	AT1G79120		Ubiquitin carboxyl-terminal hydrolase family protein	LOC_Os03g46460	ubiquitin carboxyl-terminal hydrolase
TraesCS7B02G111400	-5.92137	0.000913179	0.0405056	Down	AT5G17260	NAC086	NAC domain-containing protein 86	LOC_Os11g04360	alpha/beta hydrolase fold
TraesCS6B02G275800	-5.93198	5.35449e-07	0.000235723	Down	AT2G45110	EXPB4	Expansin-B4	LOC_Os02g44108	expansin precursor
TraesCS5D02G250200	-5.93303	0.00120471	0.0484059	Down	AT5G07900		Mitochondrial transcription termination factor family protein	LOC_Os06g12100	mTERF family protein
TraesCS5B02G260800	-5.94032	8.01287e-06	0.0017738	Down	AT2G44310		Calcium-binding EF-hand family protein	LOC_Os09g31040	EF hand family protein
TraesCS4B02G061100	-5.94205	1.76769e-05	0.00300237	Down	AT3G12220	SCPL16	Serine carboxypeptidase-like 16	LOC_Os02g46260	OsSCP9 - Putative Serine Carboxypeptidase homologue
TraesCS4B02G224000	-5.94816	0.000703905	0.0345555	Down	AT1G12330		unknown protein%3B INVOLVED IN: biological_process unknown%3B LOCATED IN: chloroplast%3B EXPRESSED IN: 21 plant structures%3B EXPRESSED DURING: 12 growth stages%3B BEST Arabidopsis thaliana protein match is: unknown protein (TAIR:AT5G12900.1)%3B Has 249 Blast h /.../ 249 proteins in 27 species: Archae - 0%3B Bacteria - 0%3B Metazoa - 7%3B Fungi - 14%3B Plants - 217%3B Viruses - 0%3B Other Eukaryo…	LOC_Os03g14500	expressed protein
TraesCS2D02G357400	-5.95762	0.00011993	0.0110965	Down	AT2G38970		Zinc finger (C3HC4-type RING finger) family protein	LOC_Os10g32760	zinc finger family protein
TraesCS7B02G181300	-5.96394	0.000139537	0.0121512	Down	AT3G44380		Late embryogenesis abundant (LEA) hydroxyproline-rich glycoprotein family	LOC_Os08g44410	harpin-induced protein 1 domain containing protein
TraesCS7D02G072800	-5.97989	0.000544335	0.0292152	Down				LOC_Os07g03100	OsFBX212 - F-box domain containing protein
TraesCS5D02G430400	-5.98067	1.30158e-05	0.0024763	Down	AT3G54950	PLP7	Patatin-like protein 7	LOC_Os03g57080	PLA IIIA/PLP7
TraesCS4A02G400100	-5.98776	0.000318805	0.0209324	Down	AT3G46530	RPP13	Disease resistance protein RPP13	LOC_Os08g42670	resistance protein
TraesCS4D02G140700	-5.99392	2.82161e-05	0.00412556	Down	AT2G24440		selenium binding	LOC_Os11g47770	selT/selW/selH selenoprotein domain containing protein
TraesCS1A02G336900	-6.00525	2.40802e-06	0.00073835	Down				LOC_Os03g43050	LTPL90 - Protease inhibitor/seed storage/LTP family protein precursor
TraesCS2D02G373000	-6.02551	9.31793e-05	0.00935208	Down	AT3G19800		Protein of unknown function (DUF177)	LOC_Os04g44340	expressed protein
TraesCS5B02G031800	-6.02577	5.61319e-05	0.00667287	Down	AT3G17630	CHX19	Cation/H(+) antiporter 19	LOC_Os12g42200	ATCHX
TraesCS5A02G502600	-6.02811	6.73338e-07	0.000279808	Down	AT1G47480	CXE2	Probable carboxylesterase 2	LOC_Os08g37050	gibberellin receptor GID1L2
TraesCS2A02G337800	-6.03696	0.000151073	0.0128616	Down	AT3G05470	FH11	Formin-like protein 11	LOC_Os04g38810	formin
TraesCS7A02G023000	-6.04248	0.000926109	0.0408497	Down				LOC_Os11g27430	NB-ARC domain containing protein
TraesCS2D02G057100	-6.04607	5.3641e-05	0.00646599	Down	AT5G55350	AT4	Probable long-chain-alcohol O-fatty-acyltransferase 4	LOC_Os04g20880	wax synthase isoform 1
TraesCS1D02G035600	-6.05984	0.000747184	0.0360451	Down	AT4G22120	CSC1	Calcium permeable stress-gated cation channel 1	LOC_Os05g51630	early-responsive to dehydration protein-related
TraesCS3A02G388200	-6.06024	7.51734e-05	0.0080388	Down	AT1G72180		Leucine-rich receptor-like protein kinase family protein	LOC_Os01g65650	receptor-like protein kinase HAIKU2 precursor
TraesCS4B02G242700	-6.06624	4.26424e-05	0.00557377	Down	AT3G25900	HMT-1	Homocysteine S-methyltransferase 1	LOC_Os03g12110	homocysteine S-methyltransferase protein
TraesCS3B02G286900	-6.07706	0.000129426	0.0116657	Down	AT2G04160	AIR3	Subtilisin-like protease SBT5.3	LOC_Os02g10520	OsSub12 - Putative Subtilisin homologue
TraesCS4A02G245900	-6.07833	0.000173444	0.0139737	Down	AT2G30630		P-loop containing nucleoside triphosphate hydrolases superfamily protein	LOC_Os03g43010	expressed protein
TraesCS5A02G312200	-6.0804	0.00118871	0.0479665	Down	AT4G23030		MATE efflux family protein	LOC_Os09g35600	MATE domain containing protein
TraesCS7B02G114600	-6.09124	3.51047e-05	0.00483434	Down	AT1G74790	HIPL1	HIPL1 protein	LOC_Os07g09520	expressed protein
TraesCS7D02G018600	-6.10079	4.39011e-05	0.00567959	Down	AT4G34215		Probable carbohydrate esterase At4g34215	LOC_Os03g64050	receptor protein kinase
TraesCS1B02G272600	-6.10493	4.99881e-05	0.0061731	Down	AT2G02450	ANAC034	NAC domain containing protein 35	LOC_Os05g34600	no apical meristem protein
TraesCS3B02G263300	-6.10605	3.86586e-07	0.000184058	Down	AT4G19460		UDP-Glycosyltransferase superfamily protein	LOC_Os01g46430	glycosyl transferase
TraesCS3D02G454200	-6.10816	8.69306e-05	0.00888493	Down	AT3G26700		Protein kinase superfamily protein	LOC_Os01g70970	protein kinase
TraesCS6D02G063300	-6.11319	1.64643e-07	9.87293e-05	Down	AT1G07660		Histone H4	LOC_Os05g39050	Core histone H2A/H2B/H3/H4 domain containing protein
TraesCS4D02G125600	-6.11509	0.000274785	0.0189422	Down				LOC_Os12g03960	dehydrogenase-phosphopantetheinyltransferase
TraesCS6D02G250900	-6.11651	4.1423e-05	0.00547231	Down				LOC_Os03g35920	expressed protein
TraesCS7A02G481800	-6.12074	0.000565576	0.0298567	Down	AT5G08080	SYP132	Syntaxin-132	LOC_Os07g07000	syntaxin
TraesCS1B02G203200	-6.12717	0.000105012	0.0101318	Down	AT1G33260		Probable receptor-like protein kinase At1g33260	LOC_Os10g37190	protein kinase domain containing protein
TraesCS4B02G097600	-6.13492	0.000130266	0.0116722	Down	AT1G21700	SWI3C	SWI/SNF complex subunit SWI3C	LOC_Os11g08080	SWIRM domain containing protein
TraesCS5B02G263800	-6.16376	0.000509486	0.0280487	Down	AT3G10060	FKBP16-4	Peptidyl-prolyl cis-trans isomerase FKBP16-4%2C chloroplastic	LOC_Os07g09040	peptidyl-prolyl cis-trans isomerase
TraesCS1A02G412100	-6.16936	5.47782e-07	0.000239171	Down	AT4G18570		Tetratricopeptide repeat (TPR)-like superfamily protein	LOC_Os05g49820	chloroplast unusual positioning protein
TraesCS2A02G513100	-6.17297	6.9521e-06	0.00160655	Down
TraesCS5D02G312000	-6.17979	0.000351375	0.0222387	Down	AT2G43820	UGT74F2	UDP-glycosyltransferase 74F2	LOC_Os09g34214	UDP-glucoronosyl and UDP-glucosyl transferase domain containing protein
TraesCS5A02G169500	-6.19852	0.00107781	0.0452373	Down	AT5G48220		Aldolase-type TIM barrel family protein	LOC_Os09g08130	indole-3-glycerol phosphate synthase
TraesCS5B02G143100	-6.21275	2.56179e-07	0.000137757	Down	AT3G54220	SCR	Protein SCARECROW	LOC_Os11g03110	GRAS family transcription factor domain containing protein
TraesCS5D02G413400	-6.2299	0.000134406	0.0119013	Down	AT5G66560		BTB/POZ domain-containing protein At5g66560	LOC_Os03g55830	BTBN10 - Bric-a-Brac
TraesCS4A02G386500	-6.24043	6.5494e-07	0.00027457	Down	AT1G56220		Dormancy/auxin associated family protein	LOC_Os08g35190	auxin-repressed protein
TraesCS2A02G350300	-6.26707	0.000352131	0.0222633	Down	AT1G33440	NPF4.4	Protein NRT1/ PTR FAMILY 4.4	LOC_Os04g41450	TGF-beta receptor
TraesCS4A02G313200	-6.26979	9.46311e-05	0.00943826	Down	AT1G04610	YUC3	Probable indole-3-pyruvate monooxygenase YUCCA3	LOC_Os07g25540	flavin monooxygenase
TraesCS5D02G188500	-6.27383	0.000457452	0.0260346	Down				LOC_Os09g15540	OsFBX312 - F-box domain containing protein
TraesCS1D02G271500	-6.27979	0.000288496	0.0195521	Down	AT1G67720		Probable LRR receptor-like serine/threonine-protein kinase At1g67720	LOC_Os11g39490	jacalin-like lectin domain containing protein
TraesCS2B02G241200	-6.28322	0.000130321	0.0116722	Down	AT5G55180		O-Glycosyl hydrolases family 17 protein	LOC_Os07g35350	glucan endo-1
TraesCS7B02G424600	-6.28705	6.60149e-05	0.00743586	Down	AT4G01070	UGT72B1	UDP-glycosyltransferase 72B1	LOC_Os01g43270	hydroquinone glucosyltransferase
TraesCS2B02G380900	-6.29034	1.13607e-06	0.000420225	Down				LOC_Os10g34602	csAtPR5
TraesCS1B02G403000	-6.29318	0.00041881	0.0247048	Down	AT5G38110	ASF1B	Histone chaperone ASF1B	LOC_Os05g48030	anti-silencing protein
TraesCS7B02G292700	-6.30135	6.96824e-05	0.00769479	Down	AT1G15520	ABCG40	ABC transporter G family member 40	LOC_Os01g42410	pleiotropic drug resistance protein
TraesCS7A02G388800	-6.30236	6.18096e-05	0.00714432	Down	AT1G62400	HT1	Protein kinase superfamily protein	LOC_Os06g43030	protein kinase domain containing protein
TraesCS3D02G145700	-6.31902	0.00112751	0.0464568	Down	AT1G28600		GDSL esterase/lipase At1g28600	LOC_Os01g11760	GDSL-like lipase/acylhydrolase
TraesCS5D02G070200	-6.33525	0.000191429	0.0149894	Down	AT3G04710	TPR10	ankyrin repeat family protein	LOC_Os12g40770	ankyrin-1
TraesCS4B02G180300	-6.33557	8.1499e-07	0.000320403	Down				LOC_Os03g19940	expressed protein
TraesCS3A02G505800	-6.35013	2.90674e-05	0.00420522	Down				LOC_Os01g73024	expressed protein
TraesCS2B02G056600	-6.35354	1.55609e-05	0.00278115	Down			ChrSy.fgenesh.mRNA	expressed protein
TraesCS4D02G133100	-6.35734	0.000418873	0.0247048	Down	AT2G39420		alpha/beta-Hydrolases superfamily protein	LOC_Os11g01040	monoglyceride lipase
TraesCS6A02G062500	-6.36416	0.000223755	0.0166797	Down				LOC_Os02g15160	OsFBX40 - F-box domain containing protein
TraesCS7A02G420900	-6.36462	0.000364263	0.0228129	Down	AT2G01770	VIT1	Vacuolar iron transporter 1	LOC_Os04g38940	integral membrane protein
TraesCS4B02G300600	-6.36502	0.000577894	0.0302336	Down	AT1G15960	NRAMP6	Metal transporter Nramp6	LOC_Os07g15370	metal transporter Nramp6
TraesCS3D02G249100	-6.3892	6.25604e-05	0.00719338	Down	AT3G26790	FUS3	B3 domain-containing transcription factor FUS3	LOC_Os01g51610	B3 DNA binding domain containing protein
TraesCS5D02G315400	-6.3945	0.00053364	0.0289669	Down	AT4G38900		Basic-leucine zipper (bZIP) transcription factor family protein	LOC_Os08g43090	bZIP family transcription factor
TraesCS5B02G144900	-6.3951	0.000366637	0.0228686	Down	AT3G10840		alpha/beta-Hydrolases superfamily protein	LOC_Os12g02589	hydrolase
TraesCS4B02G157500	-6.39869	0.000282986	0.0193029	Down	AT1G68050	ADO3	Adagio protein 3	LOC_Os11g34460	OsFBO10 - F-box and other domain containing protein
TraesCS4B02G276000	-6.40089	0.000295951	0.0198304	Down	AT5G48720	XRI1	Protein XRI1	LOC_Os04g30790	expressed protein
TraesCS1D02G408800	-6.41333	0.00113834	0.0467911	Down	AT4G19090		Protein of unknown function (DUF594)	LOC_Os10g31290	expressed protein
TraesCS6B02G185500	-6.41818	5.15561e-05	0.00630288	Down	AT1G16290		FUNCTIONS IN: molecular_function unknown%3B INVOLVED IN: biological_process unknown%3B LOCATED IN: chloroplast%2C vacuole%3B EXPRESSED IN: 19 plant structures%3B EXPRESSED DURING: 11 growth stages%3B CONTAINS InterPro DOMAIN/s: Lytic transglycosylase-like%2C cata /.../(InterPro:IPR008258)%3B Has 171 Blast hits to 155 proteins in 40 species: Archae - 0%3B Bacteria - 54%3B Metazoa - 0%3B Fungi - 0%…	LOC_Os02g07480	transglycosylase SLT domain containing protein
TraesCS6B02G014200	-6.42173	6.85595e-06	0.0015882	Down
TraesCS2B02G464000	-6.42647	0.000293427	0.019717	Down	AT1G21270	WAK2	Wall-associated receptor kinase 2	LOC_Os04g51050	OsWAK53b - OsWAK receptor-like protein kinase
TraesCS4A02G067300	-6.42874	8.80931e-05	0.00896506	Down	AT2G45420	LBD18	LOB domain-containing protein 18	LOC_Os03g14270	DUF260 domain containing protein
TraesCS3B02G257400	-6.4303	0.000135849	0.0119387	Down				LOC_Os01g44120	expressed protein
TraesCS7D02G452700	-6.4312	1.73025e-05	0.00296983	Down				LOC_Os06g46250	expressed protein
TraesCS6D02G114900	-6.43634	3.16872e-05	0.00446761	Down	AT1G72300	PSYR1	Tyrosine-sulfated glycopeptide receptor 1	LOC_Os02g05930	phytosulfokine receptor precursor
TraesCS6B02G323300	-6.45665	8.70359e-06	0.00186991	Down				LOC_Os09g04339	expressed protein
TraesCS4B02G111000	-6.45722	0.00110608	0.0459838	Down	AT1G75710		C2H2-like zinc finger protein	LOC_Os11g06840	ZOS11-01 - C2H2 zinc finger protein
TraesCS2B02G344900	-6.45792	1.57882e-05	0.00281179	Down	AT3G17840	RLK902	Probable inactive receptor kinase RLK902	LOC_Os04g38910	atypical receptor-like kinase MARK
TraesCS7B02G070000	-6.45999	4.58876e-05	0.00584364	Down	AT4G23180	CRK10	Cysteine-rich receptor-like protein kinase 10	LOC_Os05g41370	TKL_IRAK_DUF26-la.1 - DUF26 kinases have homology to DUF26 containing loci
TraesCS1A02G312300	-6.46605	1.01171e-05	0.00210208	Down	AT2G41560	ACA4	Calcium-transporting ATPase 4%2C plasma membrane-type	LOC_Os05g41580	calcium-transporting ATPase
TraesCS4D02G310300	-6.47308	0.000422866	0.0247966	Down	AT4G24770	CP31A	31 kDa ribonucleoprotein%2C chloroplastic	LOC_Os09g39180	RNA recognition motif containing protein
TraesCS7B02G007200	-6.4838	2.67883e-08	2.22639e-05	Down	AT3G14830		unknown protein%3B BEST Arabidopsis thaliana protein match is: unknown protein (TAIR:AT1G53450.2)%3B Has 73 Blast hits to 73 proteins in 12 species: Archae - 0%3B Bacteria - 0%3B Metazoa - 0%3B Fungi - 0%3B Plants - 73%3B Viruses - 0%3B Other Eukaryotes - 0 (source /.../ BLink).	LOC_Os06g05950	expressed protein
TraesCS2D02G582700	-6.4918	0.000401178	0.0242411	Down	AT5G10530	LECRK91	L-type lectin-domain containing receptor kinase IX.1	LOC_Os08g02996	receptor-like kinase
TraesCS2D02G238200	-6.49579	1.37856e-06	0.000478733	Down	AT4G11680		E3 ubiquitin-protein ligase At4g11680	LOC_Os07g27950	RING zinc finger protein
TraesCS4A02G065100	-6.50745	9.75806e-08	6.4653e-05	Down	AT3G25900	HMT-1	Homocysteine S-methyltransferase 1	LOC_Os03g12110	homocysteine S-methyltransferase protein
TraesCS7A02G354300	-6.51658	1.48525e-05	0.00271083	Down	AT2G42760		unknown protein%3B CONTAINS InterPro DOMAIN/s: Protein of unknown function DUF1685 (InterPro:IPR012881)%3B Has 170 Blast hits to 164 proteins in 34 species: Archae - 0%3B Bacteria - 1%3B Metazoa - 26%3B Fungi - 10%3B Plants - 107%3B Viruses - 0%3B Other Eukaryotes /.../source: NCBI BLink).	LOC_Os06g35770	expressed protein
TraesCS5B02G407700	-6.51765	2.27595e-05	0.00357608	Down				LOC_Os03g55770	expressed protein
TraesCS6D02G032226	-6.52255	7.23701e-05	0.00784528	Down
TraesCS2A02G308100	-6.55676	9.49787e-06	0.00199798	Down	AT1G22930		T-complex protein 11	LOC_Os04g35840	T-complex protein 11
TraesCS6D02G305400	-6.55815	2.68087e-06	0.000803801	Down	AT1G05010	ACO4	1-aminocyclopropane-1-carboxylate oxidase 4	LOC_Os02g53180	1-aminocyclopropane-1-carboxylate oxidase protein
TraesCS1B02G335800	-6.56303	0.000370385	0.0229695	Down				LOC_Os10g04540	expressed protein
TraesCS3A02G452700	-6.59393	8.58278e-06	0.00185643	Down				LOC_Os03g57830	expressed protein
TraesCS7D02G143900	-6.5982	0.000190714	0.0149581	Down	AT1G08040		Protein of unknown function (DUF707)	LOC_Os06g51200	lysine ketoglutarate reductase trans-splicing related 1
TraesCS2D02G291700	-6.61061	2.39896e-05	0.0036958	Down	AT3G19430		late embryogenesis abundant protein-related / LEA protein-related	LOC_Os04g33520	RCLEA6 - Root cap and Late embryogenesis related family protein precursor
TraesCS3D02G185100	-6.61273	2.8861e-09	3.55125e-06	Down	AT2G18150	PER15	Peroxidase 15	LOC_Os01g15830	peroxidase precursor
TraesCS4A02G317100	-6.63628	9.19511e-05	0.00924841	Down
TraesCS6B02G164300	-6.63801	1.09133e-08	1.0551e-05	Down	AT4G04220	AtRLP46	receptor like protein 46	LOC_Os08g16580	Cf2/Cf5 disease resistance protein
TraesCS7D02G078200	-6.65195	0.00114884	0.0470187	Down				LOC_Os01g32640	OsFBX9 - F-box domain containing protein
TraesCS1D02G213800	-6.65783	5.06896e-07	0.000227613	Down	AT4G22580		Exostosin family protein	LOC_Os10g40559	exostosin family domain containing protein
TraesCSU02G205200	-6.65952	0.000666597	0.0333284	Down	AT3G46730	RPP13L3	Putative disease resistance RPP13-like protein 3	LOC_Os08g28540	resistance protein LR10
TraesCS3D02G252900	-6.66944	2.87403e-05	0.00418284	Down	AT1G51760	ILL4	IAA-amino acid hydrolase ILR1-like 4	LOC_Os01g51060	hydrolase
TraesCS2D02G173300	-6.67462	7.18071e-05	0.00782904	Down	AT2G26530	AR781	Protein of unknown function (DUF1645)	LOC_Os07g42740	DUF1645 domain containing protein
TraesCS5B02G241600	-6.68564	0.000212971	0.0161684	Down	AT3G63470	SCPL40	Serine carboxypeptidase-like 40	LOC_Os09g28830	OsSCP42 - Putative Serine Carboxypeptidase homologue
TraesCS5B02G049800	-6.69135	1.46682e-05	0.00270222	Down	AT4G01690	PPOX1	Protoporphyrinogen oxidase 1%2C chloroplastic	LOC_Os01g18320	protoporphyrinogen oxidase
TraesCS1A02G424300	-6.75308	1.35488e-05	0.00254702	Down	AT2G46225	ABIL1	Protein ABIL1	LOC_Os05g50800	expressed protein
TraesCS3D02G545100	-6.77323	1.92585e-05	0.00319556	Down	AT2G16500	SPE1	Arginine decarboxylase 1	LOC_Os04g01690	pyridoxal-dependent decarboxylase protein
TraesCS2D02G565300	-6.79071	2.94346e-05	0.00423279	Down	AT4G04955	ALN	Allantoinase	LOC_Os04g58390	allantoinase
TraesCS1B02G060200	-6.801	4.01285e-05	0.00532495	Down				LOC_Os05g02970	expressed protein
TraesCS3D02G205000	-6.80287	0.000161534	0.0134017	Down	AT1G15390	PDF1A	Peptide deformylase 1A%2C chloroplastic/mitochondrial	LOC_Os01g37510	peptide deformylase
TraesCS7A02G222200	-6.8098	1.94301e-06	0.000632619	Down	AT1G05260	PER3	Peroxidase 3	LOC_Os06g29470	peroxidase precursor
TraesCS3B02G234300	-6.81987	0.00039753	0.0240667	Down	AT1G15390	PDF1A	Peptide deformylase 1A%2C chloroplastic/mitochondrial	LOC_Os01g37510	peptide deformylase
TraesCS3D02G288000	-6.84083	6.34026e-07	0.000268176	Down	AT3G24430	HCF101	Fe-S cluster assembly factor HCF101%2C chloroplastic	LOC_Os01g52170	expressed protein
TraesCS6D02G033100	-6.85427	1.50746e-06	0.000513763	Down	AT3G10080		Germin-like protein subfamily 3 member 2	LOC_Os02g32980	Cupin domain containing protein
TraesCS5B02G392500	-6.86627	0.00013999	0.0121572	Down	AT3G18990	VRN1	B3 domain-containing transcription factor VRN1	LOC_Os11g09160	B3 DNA binding domain containing protein
TraesCS2A02G005300	-6.8776	0.00111218	0.0461374	Down	AT2G17940		WEB family protein At2g17940	LOC_Os04g02650	expressed protein
TraesCS3D02G378900	-6.88172	1.78086e-11	5.81827e-08	Down	AT1G44760		Adenine nucleotide alpha hydrolases-like superfamily protein	LOC_Os01g65440	universal stress protein domain containing protein
TraesCS3A02G488700	-6.90341	7.96504e-10	1.20142e-06	Down	AT1G05990	CML7	Calmodulin-like protein 7	LOC_Os01g72080	calmodulin-like protein 1
TraesCS2D02G094200	-6.91915	2.58804e-07	0.000137757	Down	AT1G56430	NAS4	Probable nicotianamine synthase 4	LOC_Os07g48980	nicotianamine synthase
TraesCS4B02G377200	-6.93251	5.8563e-05	0.0068756	Down	AT5G39110	GLP6	Germin-like protein subfamily 1 member 14	LOC_Os08g08990	Cupin domain containing protein
TraesCS7A02G208100	-6.94246	1.30168e-09	1.86862e-06	Down	AT3G10185	GASA13	Gibberellin-regulated protein 13	LOC_Os06g15620	GASR7 - Gibberellin-regulated GASA/GAST/Snakin family protein precursor
TraesCS5B02G056300	-6.95327	1.99775e-05	0.0032705	Down	AT4G20760		NAD(P)-binding Rossmann-fold superfamily protein	LOC_Os12g41590	oxidoreductase
TraesCS7D02G094700	-6.96185	0.000376556	0.0231978	Down	AT3G61370		Protein of unknown function (DUF3245)	LOC_Os08g44540	expressed protein
TraesCS5B02G132400	-6.97387	3.09875e-06	0.000889679	Down	AT3G07960	PIP5K6	Phosphatidylinositol 4-phosphate 5-kinase 6	LOC_Os07g46490	phosphatidylinositol-4-phosphate 5-kinase
TraesCS3D02G193000	-6.98075	2.10715e-07	0.000119547	Down				LOC_Os01g16980	expressed protein
TraesCS2B02G241400	-6.9824	2.43559e-05	0.00373401	Down	AT4G23180	CRK10	Cysteine-rich receptor-like protein kinase 10	LOC_Os07g35340	TKL_IRAK_DUF26-lc.14 - DUF26 kinases have homology to DUF26 containing loci
TraesCS4A02G484100	-7.00538	1.45651e-06	0.000501828	Down				LOC_Os01g41950	expressed protein
TraesCS7D02G209800	-7.0113	0.00052141	0.028443	Down	AT1G68640	PAN	Transcription factor PERIANTHIA	LOC_Os06g15480	transcription factor
TraesCS5B02G053800	-7.01671	5.3671e-06	0.00131398	Down	AT1G16670		Protein kinase superfamily protein	LOC_Os12g41710	Protein kinase domain containing protein
TraesCS5D02G561300	-7.02195	2.58635e-05	0.00386845	Down	AT3G14470	RPPL1	Putative disease resistance RPP13-like protein 1	LOC_Os02g16270	xa1
TraesCS6B02G324900	-7.04092	2.69786e-07	0.000142006	Down
TraesCS1A02G099100	-7.08991	5.87516e-09	6.32554e-06	Down	AT5G16910	CSLD2	Cellulose synthase-like protein D2	LOC_Os07g36630	CSLF8 - cellulose synthase-like family F; beta1
TraesCS6A02G397800	-7.09049	8.4799e-05	0.00875203	Down
TraesCS6D02G028900	-7.14747	5.32917e-11	1.23151e-07	Down	AT3G07040	RPM1	Disease resistance protein RPM1	LOC_Os08g42700	resistance protein
TraesCS1A02G399900	-7.1918	2.33982e-05	0.00362237	Down	AT2G30890		Cytochrome b561 domain-containing protein At2g30890	LOC_Os05g49040	expressed protein
TraesCS5B02G145000	-7.2174	0.000103036	0.0100023	Down	AT3G08600		Protein of unknown function (DUF1191)	LOC_Os11g02630	expressed protein
TraesCS2D02G444300	-7.23246	1.14174e-06	0.000420225	Down	AT1G79180	ATMYB63	myb domain protein 63	LOC_Os04g50770	MYB family transcription factor
TraesCS1D02G087100	-7.23412	0.000164572	0.0135001	Down				LOC_Os07g18560	OsFBLD6 - F-box
TraesCS7D02G299600	-7.24234	2.53133e-07	0.000137575	Down	AT4G01270		RING/U-box superfamily protein	LOC_Os08g05560	zinc finger
TraesCS2D02G444200	-7.24464	8.05632e-07	0.000319374	Down	AT1G79180	ATMYB63	myb domain protein 63	LOC_Os04g50770	MYB family transcription factor
TraesCS1B02G242200	-7.29412	4.29307e-07	0.00020037	Down	AT3G05640		Probable protein phosphatase 2C 34	LOC_Os05g29030	protein phosphatase 2C
TraesCS2B02G141500	-7.32912	0.000222891	0.0166546	Down	AT3G50150		Plant protein of unknown function (DUF247)	LOC_Os11g34090	plant protein of unknown function domain containing protein
TraesCS5B02G125200	-7.32913	1.37359e-08	1.26352e-05	Down				LOC_Os12g06190	expressed protein
TraesCS4B02G341400	-7.33136	7.92515e-07	0.000316825	Down	AT2G23000	SCPL10	Serine carboxypeptidase-like 10	LOC_Os04g09720	OsSCP22 - Putative Serine Carboxypeptidase homologue
TraesCS2A02G350100	-7.3491	3.9414e-09	4.49918e-06	Down	AT1G69850	NPF4.6	Protein NRT1/ PTR FAMILY 4.6	LOC_Os04g41450	TGF-beta receptor
TraesCS6A02G346700	-7.35209	0.000366005	0.0228598	Down	AT5G18840		Sugar transporter ERD6-like 16	LOC_Os11g42430	transporter family protein
TraesCS7A02G189100	-7.35563	3.23158e-12	1.39173e-08	Down	AT5G22740	CSLA2	Glucomannan 4-beta-mannosyltransferase 2	LOC_Os03g07350	CSLA4 - cellulose synthase-like family A; mannan synthase
TraesCS3A02G293700	-7.3921	2.04465e-06	0.00065892	Down	AT3G58120	BZIP61	Basic leucine zipper 61	LOC_Os01g55150	bZIP transcription factor domain containing protein
TraesCS1B02G285800	-7.47502	1.11e-05	0.00222538	Down	AT1G08320	TGA9	bZIP transcription factor family protein	LOC_Os05g37170	transcription factor
TraesCS2B02G099500	-7.54219	5.85457e-08	4.40236e-05	Down	AT5G05580	FAD8	Temperature-sensitive omega-3 fatty acid desaturase%2C chloroplastic	LOC_Os07g49310	omega-3 fatty acid desaturase
TraesCS5D02G543000	-7.67919	2.74156e-09	3.41779e-06	Down	AT3G47570		Probable LRR receptor-like serine/threonine-protein kinase At3g47570	LOC_Os11g40970	receptor-like protein kinase precursor
TraesCS2A02G192500	-7.68357	2.23006e-06	0.000709024	Down	AT5G50890		alpha/beta-Hydrolases superfamily protein	LOC_Os07g39810	lipase class 3 family protein
TraesCS3D02G293500	-7.69509	2.19518e-10	4.07812e-07	Down	AT3G58120	BZIP61	Basic leucine zipper 61	LOC_Os01g55150	bZIP transcription factor domain containing protein

## Sheet: 14 HAI
	The information of salt-regulated DEGs at 14HAI.
Gene ID	Log2 (Fold Change)	P-value	FDR	Regulation	Annotation
					The homologous genes and corresponding descriptions in Arabidopsis thaliana			The homologous genes and corresponding descriptions in Oryza sativa
TraesCS5D02G547200	7.74484	1.17316e-05	0.000130232	Up	AT3G46730	RPP13L3	Putative disease resistance RPP13-like protein 3	LOC_Os10g04110	MLA6 protein
TraesCS2D02G473300	7.46377	7.58599e-06	9.0317e-05	Up	AT3G47860	CHL	chloroplastic lipocalin	LOC_Os04g53490	OsCHL Chloroplastic lipocalin
TraesCS1B02G157200	5.66103	8.46468e-07	1.46805e-05	Up	AT2G37710	LECRK41	L-type lectin-domain containing receptor kinase IV.1	LOC_Os09g09500	lectin-like receptor kinase
TraesCS2A02G465000	5.54149	3.45892e-06	4.72694e-05	Up	AT3G25510		disease resistance protein (TIR-NBS-LRR class)%2C putative	LOC_Os02g02660	retrotransposon protein
TraesCS2D02G504700	5.48314	0.000288123	0.00181265	Up
TraesCS7B02G203300	5.43764	0.000440073	0.00257171	Up	AT3G28345	ABCB15	ABC transporter B family member 15	LOC_Os08g05710	ABC transporter
TraesCS5B02G423500	5.34156	0.000980622	0.00495599	Up				LOC_Os01g57968	expressed protein
TraesCS6A02G044200	5.29058	2.74989e-05	0.000262378	Up	AT4G13920	AtRLP50	receptor like protein 50	LOC_Os01g41770	leucine rich repeat protein
TraesCS6A02G100300	5.22962	0.0134622	0.0423622	Up	AT1G54570		Acyltransferase-like protein At1g54570%2C chloroplastic	LOC_Os01g26039	expressed protein
TraesCS2A02G227600	5.16697	0.000485246	0.00278401	Up
TraesCS2A02G495600	4.91429	2.08945e-05	0.00020854	Up	AT3G14470	RPPL1	Putative disease resistance RPP13-like protein 1	LOC_Os11g47780	pollen signalling protein with adenylyl cyclase activity
TraesCS1B02G194400	4.86147	1.55318e-06	2.43316e-05	Up	AT1G10360	GSTU18	Glutathione S-transferase U18	LOC_Os10g38489	glutathione S-transferase GSTU6
TraesCS4A02G159600	4.79119	0.000544721	0.00306364	Up				LOC_Os07g34550	retrotransposon protein
TraesCS7B02G028700	4.72512	3.02004e-08	9.11554e-07	Up	AT4G06746	RAP2-9	Ethylene-responsive transcription factor RAP2-9	LOC_Os06g07030	AP2 domain containing protein
TraesCS4B02G022800	4.50976	9.77774e-05	0.000746196	Up				LOC_Os12g43750	expressed protein
TraesCS5A02G539100	4.47092	0.011002	0.0359088	Up	AT2G46760	GULLO6	Probable L-gulonolactone oxidase 6	LOC_Os08g02230	FAD-binding and arabino-lactone oxidase domains containing protein
TraesCS4D02G176500	4.35775	0.000107505	0.0008068	Up	AT3G04030		Homeodomain-like superfamily protein	LOC_Os03g20900	Myb transcription factor
TraesCS3B02G131200	4.22157	0.0157932	0.0482334	Up	AT5G12020	HSP17.6	17.6 kDa class II heat shock protein	LOC_Os01g08860	hsp20/alpha crystallin family protein
TraesCS2A02G031200	3.95704	2.12966e-07	4.68704e-06	Up				LOC_Os04g02070	expressed protein
TraesCS7A02G251200	3.82864	8.09586e-07	1.41475e-05	Up	AT4G31250		Probable LRR receptor-like serine/threonine-protein kinase At4g31250	LOC_Os08g40990	receptor-like protein kinase 1
TraesCS1B02G108900	3.79852	0.00687202	0.0243783	Up	AT3G21480		BRCT domain-containing DNA repair protein	LOC_Os05g05440	expressed protein
TraesCS3D02G046300	3.74511	5.50538e-07	1.03433e-05	Up	AT5G59720	HSP18.1	18.1 kDa class I heat shock protein	LOC_Os01g04370	hsp20/alpha crystallin family protein
TraesCS4B02G005600	3.74042	0.000823756	0.00430454	Up	AT2G36750	UGT73C1	UDP-glycosyltransferase 73C1	LOC_Os02g11700	cytokinin-O-glucosyltransferase 3
TraesCS7D02G076900	3.69707	0.000534719	0.00301634	Up	AT5G62680	NPF2.11	Protein NRT1/ PTR FAMILY 2.11	LOC_Os12g44110	ligA
TraesCS6A02G339700	3.66704	0.000708631	0.00380073	Up	AT1G59510	CF9	Carbohydrate-binding protein	LOC_Os10g01290	PHLOEM 2-LIKE A10
TraesCS4D02G132400	3.66438	0.000496666	0.00283818	Up	AT1G09700	DRB1	Double-stranded RNA-binding protein 1	LOC_Os12g01916	double-stranded RNA binding motif containing protein
TraesCS3A02G446600	3.58651	2.33946e-05	0.000228981	Up	AT4G13420	POT5	Potassium transporter 5	LOC_Os02g31940	potassium transporter
TraesCS2A02G182700	3.51537	1.31849e-05	0.000143456	Up	AT2G03340	WRKY3	Probable WRKY transcription factor 3	LOC_Os07g40570	WRKY88
TraesCS6D02G080000	3.47063	0.00313083	0.0128169	Up	ATCG00820	RPS19	ribosomal protein S19	LOC_Os04g16818	chloroplast 30S ribosomal protein S19
TraesCS5B02G390800	3.38695	0.000329243	0.00202273	Up				LOC_Os03g53620	late embryogenesis abundant protein D-34
TraesCS5A02G424800	3.35964	0.00765341	0.026623	Up				LOC_Os11g26780	dehydrin
TraesCS5B02G026500	3.34016	0.000471529	0.00272146	Up	AT1G58390		Probable disease resistance protein At1g58390	LOC_Os08g42670	resistance protein
TraesCS5A02G226400	3.32994	4.80414e-10	2.76197e-08	Up	AT5G20400		2-oxoglutarate (2OG) and Fe(II)-dependent oxygenase superfamily protein	LOC_Os02g17940	leucoanthocyanidin dioxygenase
TraesCS3A02G316800	3.302	5.8407e-05	0.000487992	Up	AT3G14460		Putative disease resistance protein At3g14460	LOC_Os01g57280	rp1
TraesCS7B02G133300	3.20262	1.22315e-05	0.00013466	Up	AT5G23240		DNAJ heat shock N-terminal domain-containing protein	LOC_Os06g28050	expressed protein
TraesCS6D02G293200	3.13519	0.00331862	0.0134296	Up	AT2G22540	SVP	MADS-box protein SVP	LOC_Os02g52340	OsMADS22 - MADS-box family gene with MIKCc type-box
TraesCS6D02G114600	3.13336	9.45954e-05	0.000725535	Up	AT1G72300	PSYR1	Tyrosine-sulfated glycopeptide receptor 1	LOC_Os02g05910	phytosulfokine receptor precursor
TraesCS7D02G356200	3.12535	1.87639e-05	0.000190895	Up	AT3G47090		Leucine-rich repeat protein kinase family protein	LOC_Os02g13780	receptor-like protein kinase 2 precursor
TraesCS2D02G356900	3.08592	0.000832621	0.00434211	Up	AT1G80050	APT2	Adenine phosphoribosyltransferase 2	LOC_Os04g42520	phosphoribosyl transferase
TraesCS3D02G417900	3.07446	0.0008237	0.00430454	Up
TraesCS5D02G453700	3.0531	1.25797e-05	0.000137885	Up	AT5G16950		unknown protein%3B Has 1807 Blast hits to 1807 proteins in 277 species: Archae - 0%3B Bacteria - 0%3B Metazoa - 736%3B Fungi - 347%3B Plants - 385%3B Viruses - 0%3B Other Eukaryotes - 339 (source: NCBI BLink).	LOC_Os01g15448	expressed protein
TraesCS1D02G386200	3.01589	2.04269e-06	3.05215e-05	Up	AT3G14460		Putative disease resistance protein At3g14460	LOC_Os01g57270	disease resistance RPP13-like protein 1
TraesCS1B02G085200	3.0061	0.0006548	0.00355998	Up	AT3G10420	SPD1	P-loop containing nucleoside triphosphate hydrolases superfamily protein	LOC_Os07g08970	uncharacterized protein ycf45
TraesCS2D02G414200	2.99322	1.08895e-05	0.000122027	Up	AT5G47240	NUDT8	Nudix hydrolase 8	LOC_Os04g46280	hydrolase
TraesCS5D02G368500	2.8983	3.27815e-05	0.00030349	Up	AT3G61600	POB1	BTB/POZ domain-containing protein POB1	LOC_Os02g16000	E1-BTB1 - Bric-a-Brac
TraesCS1A02G235400	2.82937	0.00476919	0.0180868	Up
TraesCS3D02G007400	2.80428	5.93269e-06	7.35191e-05	Up	AT5G40270		HD domain-containing metal-dependent phosphohydrolase family protein	LOC_Os01g01920	HD domain containing protein 2
TraesCS5D02G237800	2.75782	0.000507634	0.0028904	Up	AT3G51895	SULTR3%3B1	Sulfate transporter 3.1	LOC_Os03g09970	sulfate transporter
TraesCS3B02G370700	2.74515	2.12159e-07	4.67687e-06	Up	AT5G15790		RING/U-box superfamily protein	LOC_Os03g40170	zinc finger
TraesCS6A02G132700	2.73956	0.00253696	0.0107807	Up	AT1G15330	PV42A	SNF1-related protein kinase regulatory subunit gamma-like PV42a	LOC_Os02g06410	CBS domain containing membrane protein
TraesCS5D02G494200	2.7141	6.27251e-05	0.000516195	Up	AT5G18980		ARM repeat superfamily protein	LOC_Os07g45490	expressed protein
TraesCS1A02G100000	2.70687	0.00815932	0.0280756	Up				LOC_Os05g05500	OsFBX159 - F-box domain containing protein
TraesCS3D02G341400	2.6912	2.14788e-06	3.18322e-05	Up	AT3G56140		Protein of unknown function (DUF399 and DUF3411)	LOC_Os01g61120	expressed protein
TraesCS3B02G049800	2.69078	0.00478998	0.0181482	Up	AT5G59720	HSP18.1	18.1 kDa class I heat shock protein	LOC_Os01g04380	hsp20/alpha crystallin family protein
TraesCS4A02G212000	2.64593	3.20504e-07	6.60284e-06	Up				LOC_Os12g08700	expressed protein
TraesCS3B02G290200	2.64042	0.00028048	0.00177304	Up	AT3G16520	UGT88A1	UDP-glycosyltransferase 88A1	LOC_Os01g50200	UDP-glucoronosyl and UDP-glucosyl transferase domain containing protein
TraesCS4A02G241600	2.6284	0.00118153	0.00577663	Up
TraesCS5D02G216200	2.62518	2.62256e-05	0.000251495	Up	AT5G55490	GEX1	Protein GAMETE EXPRESSED 1	LOC_Os09g27040	GEX1
TraesCS7B02G093200	2.61874	0.000636898	0.00348223	Up	AT5G49630	AAP6	Amino acid permease 6	LOC_Os01g66010	amino acid transporter
TraesCS2A02G367700	2.59404	0.0108274	0.0354451	Up	AT2G33380	PXG3	Probable peroxygenase 3	LOC_Os04g43200	caleosin related protein
TraesCS1B02G475000	2.58148	6.11609e-05	0.000505782	Up	AT5G56850		unknown protein%3B EXPRESSED IN: 21 plant structures%3B EXPRESSED DURING: 13 growth stages%3B Has 35333 Blast hits to 34131 proteins in 2444 species: Archae - 798%3B Bacteria - 22429%3B Metazoa - 974%3B Fungi - 991%3B Plants - 531%3B Viruses - 0%3B Other Eukaryotes - /.../(source: NCBI BLink).	LOC_Os05g14270	expressed protein
TraesCS2D02G211000	2.57003	0.0014541	0.00683689	Up	AT1G61340		F-box protein At1g61340	LOC_Os07g37400	OsFBX257 - F-box domain containing protein
TraesCS4D02G045200	2.53309	7.45555e-07	1.32509e-05	Up	AT1G73885		unknown protein%3B FUNCTIONS IN: molecular_function unknown%3B INVOLVED IN: biological_process unknown%3B LOCATED IN: chloroplast thylakoid membrane%2C chloroplast%3B Has 37 Blast hits to 37 proteins in 13 species: Archae - 0%3B Bacteria - 0%3B Metazoa - 0%3B Fungi /.../Plants - 37%3B Viruses - 0%3B Other Eukaryotes - 0 (source: NCBI BLink).	LOC_Os03g50270	expressed protein
TraesCS7D02G192600	2.52782	0.0100875	0.0334575	Up				LOC_Os05g05760	expressed protein
TraesCS5B02G446200	2.5178	0.00119977	0.00584801	Up	AT2G34930		disease resistance family protein / LRR family protein	LOC_Os01g41770	leucine rich repeat protein
TraesCS2D02G449300	2.51205	0.00440668	0.0169446	Up
TraesCS2B02G208000	2.50067	0.00371752	0.0147233	Up	AT5G61210	SNAP33	SNAP25 homologous protein SNAP33	LOC_Os02g32740	SNARE domain containing protein
TraesCS3B02G302900	2.47199	9.47409e-06	0.000108515	Up	AT5G03415	DPB	Transcription factor-like protein DPB	LOC_Os01g48700	transcription factor Dp
TraesCS1A02G399200	2.4645	0.000508401	0.00289358	Up				LOC_Os01g34630	retrotransposon protein
TraesCS6B02G353800	2.43061	0.00848537	0.0289891	Up	AT5G06700	TBR	Protein trichome birefringence	LOC_Os02g53380	expressed protein
TraesCS7A02G323500	2.40334	0.0102206	0.0338223	Up	AT1G19025		DNA repair metallo-beta-lactamase family protein	LOC_Os08g01630	DNA repair metallo-beta-lactamase
TraesCS6D02G349400	2.39793	3.00486e-05	0.000282635	Up	AT5G11090		serine-rich protein-related	LOC_Os02g55610	serine-rich protein
TraesCS4D02G322700	2.38874	0.00454482	0.0173839	Up	AT1G20630	CAT1	Catalase-1	LOC_Os03g03910	catalase domain containing protein
TraesCS1D02G128100	2.36822	0.00457392	0.017477	Up
TraesCS4A02G092700	2.36494	0.00122322	0.00593936	Up	AT3G46230	HSP17.4A	17.4 kDa class I heat shock protein	LOC_Os03g15960	hsp20/alpha crystallin family protein
TraesCS3B02G239100	2.36348	0.000237162	0.00154582	Up	AT5G57030	LUT2	Lycopene epsilon cyclase%2C chloroplastic	LOC_Os01g39960	lycopene epsilon cyclase
TraesCS2B02G454500	2.36079	0.0012616	0.0060914	Up	AT5G57540	XTH13	Putative xyloglucan endotransglucosylase/hydrolase protein 13	LOC_Os04g51520	glycosyl hydrolases family 16
TraesCS7D02G235100	2.35578	0.00240172	0.0103063	Up	AT5G23240		DNAJ heat shock N-terminal domain-containing protein	LOC_Os06g28050	expressed protein
TraesCS4D02G132300	2.34447	0.00148718	0.00696168	Up	AT2G40410	CAN2	Staphylococcal-like nuclease CAN2	LOC_Os11g01830	staphylococcal nuclease homologue
TraesCS4A02G180300	2.3387	3.76285e-06	5.04978e-05	Up	AT2G40410	CAN2	Staphylococcal-like nuclease CAN2	LOC_Os11g01830	staphylococcal nuclease homologue
TraesCS5A02G531900	2.3362	0.000130079	0.000942236	Up				LOC_Os03g01580	expressed protein
TraesCS3D02G046700	2.32852	0.000416359	0.00245677	Up	AT5G59720	HSP18.1	18.1 kDa class I heat shock protein	LOC_Os01g04370	hsp20/alpha crystallin family protein
TraesCS7A02G056600	2.32367	7.8e-05	0.000618115	Up	AT5G03880		Thioredoxin family protein	LOC_Os08g44400	glutathione S-transferase
TraesCS2A02G306600	2.3059	0.0060146	0.0218689	Up	AT2G13600	PCMP-E76	Pentatricopeptide repeat-containing protein At2g13600	LOC_Os04g35610	pentatricopeptide
TraesCS2D02G231200	2.281	0.00830945	0.0285125	Up	AT1G75460		ATP-dependent protease La (LON) domain protein	LOC_Os07g32560	ATP-dependent protease
TraesCS2D02G302200	2.28019	2.82711e-06	3.99973e-05	Up	AT2G33793		unknown protein%3B Has 35333 Blast hits to 34131 proteins in 2444 species: Archae - 798%3B Bacteria - 22429%3B Metazoa - 974%3B Fungi - 991%3B Plants - 531%3B Viruses - 0%3B Other Eukaryotes - 9610 (source: NCBI BLink).	LOC_Os07g15280	expressed protein
TraesCS2B02G489500	2.25833	0.0144333	0.0448479	Up	AT1G06230	GTE4	Transcription factor GTE4	LOC_Os04g53170	bromodomain containing protein
TraesCS3B02G429000	2.24918	0.00122359	0.00594027	Up	AT2G31560		Protein of unknown function (DUF1685)	LOC_Os11g17930	expressed protein
TraesCS2D02G201700	2.23215	0.00341326	0.0137345	Up	AT2G37710	LECRK41	L-type lectin-domain containing receptor kinase IV.1	LOC_Os09g09500	lectin-like receptor kinase
TraesCS1A02G062000	2.2174	0.00014992	0.00105945	Up	AT2G38905		Low temperature and salt responsive protein family	LOC_Os05g03130	OsRCI2-7 - Putative low temperature and salt responsive protein
TraesCS4B02G075200	2.21712	0.0141863	0.0442233	Up	AT5G67390		unknown protein%3B BEST Arabidopsis thaliana protein match is: Plant protein of unknown function (DUF863) (TAIR:AT1G69360.1)%3B Has 1807 Blast hits to 1807 proteins in 277 species: Archae - 0%3B Bacteria - 0%3B Metazoa - 736%3B Fungi - 347%3B Plants - 385%3B Viru /.../0%3B Other Eukaryotes - 339 (source: NCBI BLink).	LOC_Os11g41600	expressed protein
TraesCS1B02G084600	2.20592	0.00123858	0.00599831	Up	AT3G06440	B3GALT16	Probable beta-1%2C3-galactosyltransferase 16	LOC_Os01g22550	galactosyltransferase family protein
TraesCS1A02G238400	2.20453	0.0136372	0.0427993	Up				LOC_Os08g31810	RNA recognition motif containing protein
TraesCS3B02G365800	2.20183	0.00146479	0.0068769	Up	AT3G56820		unknown protein%3B Has 34 Blast hits to 34 proteins in 13 species: Archae - 0%3B Bacteria - 0%3B Metazoa - 0%3B Fungi - 0%3B Plants - 27%3B Viruses - 0%3B Other Eukaryotes - 7 (source: NCBI BLink).	LOC_Os01g59520	cupin
TraesCS6D02G352200	2.17517	0.000552495	0.00309945	Up	AT5G20410	MGD2	Monogalactosyldiacylglycerol synthase 2%2C chloroplastic	LOC_Os02g55910	monogalactosyldiacylglycerol synthase
TraesCS3A02G502400	2.161	0.00444609	0.0170671	Up	ATMG00285	NAD2A	NADH dehydrogenase 2A	LOC_Os04g16742	NADPH-dependent oxidoreductase
TraesCS7B02G114400	2.13258	0.000479422	0.00275811	Up	AT2G31290		Ubiquitin carboxyl-terminal hydrolase family protein	LOC_Os06g15550	ubiquitin carboxyl-terminal hydrolase
TraesCS3B02G296400	2.12767	0.000645186	0.0035184	Up				LOC_Os01g49410	expressed protein
TraesCS3D02G021800	2.12752	0.0090118	0.0304712	Up	AT2G45730		eukaryotic initiation factor 3 gamma subunit family protein	LOC_Os04g02150	tRNA methyltransferase
TraesCS2B02G090100	2.10683	1.89111e-05	0.000192109	Up	AT2G45290	TKL-2	Transketolase-2%2C chloroplastic	LOC_Os04g19740	transketolase
TraesCS2B02G198700	2.09971	6.13815e-06	7.56299e-05	Up	AT1G54160	NFYA5	Nuclear transcription factor Y subunit A-5	LOC_Os07g41720	nuclear transcription factor Y subunit
TraesCS7D02G127600	2.09761	0.00116537	0.00571029	Up	AT4G36900	RAP2-10	Ethylene-responsive transcription factor RAP2-10	LOC_Os06g07030	AP2 domain containing protein
TraesCS1B02G293800	2.09402	0.00613419	0.0222074	Up	AT3G46550	FLA4	Fasciclin-like arabinogalactan protein 4	LOC_Os05g38500	fasciclin-like arabinogalactan protein
TraesCS7B02G450200	2.08769	1.66912e-06	2.58277e-05	Up	AT2G27040	AGO4	Protein argonaute 4	LOC_Os04g06770	argonaute
TraesCS2B02G456000	2.08528	0.00160901	0.00742992	Up				LOC_Os04g51410	expressed protein
TraesCS2B02G154600	2.05234	0.00384084	0.0151211	Up	AT4G29070		Phospholipase A2 family protein	LOC_Os07g46420	expressed protein
TraesCS4D02G129300	2.05125	0.00103632	0.00518358	Up	AT5G22620		Probable 2-carboxy-D-arabinitol-1-phosphatase	LOC_Os11g05260	phosphoglycerate mutase
TraesCS3D02G387000	2.03992	0.00395849	0.015498	Up	ATMG00660	ORF149	Uncharacterized mitochondrial protein AtMg00660
TraesCS6A02G308000	2.03848	0.00407	0.0158644	Up	AT1G69526		S-adenosyl-L-methionine-dependent methyltransferases superfamily protein	LOC_Os02g51030	methyltransferase domain containing protein
TraesCS5D02G379200	2.03802	0.00222274	0.00967143	Up
TraesCS1B02G195600	2.03789	0.0117488	0.0379011	Up				LOC_Os10g38020	expressed protein
TraesCS7B02G092700	2.01161	0.00129394	0.00622343	Up	AT4G10710	SPT16	FACT complex subunit SPT16	LOC_Os12g26030	FACT complex subunit SPT16
TraesCS2D02G432700	1.98565	0.00513376	0.019193	Up				LOC_Os04g51410	expressed protein
TraesCS2D02G093600	1.9703	0.0021675	0.00947853	Up	AT4G16146		cAMP-regulated phosphoprotein 19-related protein	LOC_Os03g19220	expressed protein
TraesCS5D02G413200	1.96867	0.00929836	0.0312775	Up	AT5G42650	CYP74A	Allene oxide synthase%2C chloroplastic	LOC_Os03g55800	cytochrome P450
TraesCS4B02G145700	1.96758	7.84394e-05	0.000620871	Up	ATMG00520	MATR	Intron maturase%2C type II family protein	LOC_Os12g33956	maturase
TraesCS2A02G131300	1.95993	0.00111512	0.00550631	Up	AT2G28370		CASP-like protein 5A2	LOC_Os10g20250	membrane associated DUF588 domain containing protein
TraesCS1D02G003800	1.95926	0.0041821	0.0162299	Up				LOC_Os12g44130	expressed protein
TraesCS7A02G407100	1.95106	3.55122e-06	4.82455e-05	Up
TraesCS7A02G328500	1.95027	0.0160779	0.0489323	Up	AT3G48980		Arabidopsis thaliana protein of unknown function (DUF821)	LOC_Os08g01150	DTA2
TraesCS5B02G162700	1.94076	0.000260822	0.00167119	Up				LOC_Os01g29740	expressed protein
TraesCS6B02G242400	1.93329	0.00132822	0.00635562	Up				LOC_Os01g05540	expressed protein
TraesCS1A02G119500	1.93247	1.44588e-08	4.89778e-07	Up				LOC_Os05g08730	early fruit mRNA
TraesCS1A02G000200	1.92908	0.00540363	0.02002	Up				LOC_Os09g01000	expressed protein
TraesCS7B02G301400	1.91777	0.0081716	0.0281046	Up	AT4G13780		Probable methionine--tRNA ligase	LOC_Os10g26050	methionyl-tRNA synthetase
TraesCS4B02G212200	1.90177	2.33271e-09	1.03471e-07	Up	AT3G46230	HSP17.4A	17.4 kDa class I heat shock protein	LOC_Os03g15960	hsp20/alpha crystallin family protein
TraesCS6D02G150700	1.8941	3.66936e-15	1.09326e-12	Up	ATMG00070	NAD9	NADH dehydrogenase subunit 9
TraesCS4A02G130000	1.89145	0.00473723	0.0179879	Up	AT3G04030		Homeodomain-like superfamily protein	LOC_Os03g20900	Myb transcription factor
TraesCS2B02G107400	1.8912	3.09577e-05	0.000289398	Up	AT5G25320	ACR2	ACT domain-containing protein ACR2	LOC_Os02g34990	ACT domain containing protein
TraesCS3B02G516800	1.89088	0.00301265	0.0124043	Up	AT2G07734		Alpha-L RNA-binding motif/Ribosomal protein S4 family protein	LOC_Os04g16738	chloroplast 30S ribosomal protein S4
TraesCS4B02G124300	1.87916	0.00464363	0.0176949	Up	AT1G09575		Calcium uniporter protein 6%2C mitochondrial	LOC_Os12g02880	E2F-related protein
TraesCS3B02G366100	1.8753	0.011275	0.0366371	Up	AT4G29990		Leucine-rich repeat transmembrane protein kinase protein	LOC_Os01g59570	senescence-induced receptor-like serine/threonine-protein kinase precursor
TraesCS5B02G446100	1.87269	0.0126397	0.0402378	Up	AT5G65670	IAA9	Auxin-responsive protein IAA9	LOC_Os03g58350	OsIAA14 - Auxin-responsive Aux/IAA gene family member
TraesCS7D02G098800	1.87022	0.000350716	0.00213252	Up	AT3G61370		Protein of unknown function (DUF3245)	LOC_Os08g44540	expressed protein
TraesCS1B02G085100	1.86911	0.000208593	0.001391	Up	AT3G45300	IVD	Isovaleryl-CoA dehydrogenase%2C mitochondrial	LOC_Os05g03480	acyl-coenzyme A dehydrogenase
TraesCS4A02G366700	1.86327	0.000559033	0.00312835	Up	AT4G37210		Tetratricopeptide repeat (TPR)-like superfamily protein	LOC_Os07g23900	OsFBX234 - F-box domain containing protein
TraesCS6B02G338600	1.8548	3.58468e-06	4.86303e-05	Up	ATMG00570	ORFX	Sec-independent periplasmic protein translocase	LOC_Os12g33962	uncharacterized tatC-like protein ymf16
TraesCS3B02G432600	1.83358	0.000144556	0.00102816	Up	AT2G30695		FUNCTIONS IN: molecular_function unknown%3B INVOLVED IN: protein folding%2C protein transport%3B LOCATED IN: chloroplast stroma%2C chloroplast%3B EXPRESSED IN: 23 plant structures%3B EXPRESSED DURING: 13 growth stages%3B CONTAINS InterPro DOMAIN/s: Trigger factor /.../some-binding%2C bacterial (InterPro:IPR008881)%3B Has 253 Blast hits to 253 proteins in 72 species: Archae - 0%3B Bacteria - 138%3…	LOC_Os01g66980	expressed protein
TraesCS1B02G377600	1.83065	1.66949e-05	0.000173383	Up	AT5G11840		Protein of unknown function (DUF1230)	LOC_Os05g46250	DUF1230 domain containing protein
TraesCS4D02G297000	1.82073	0.000304266	0.00189545	Up	AT3G14170		Plant protein of unknown function (DUF936)	LOC_Os03g08390	expressed protein
TraesCS4A02G475100	1.81226	0.000946579	0.00481735	Up	AT4G23160	CRK8	cysteine-rich RLK (RECEPTOR-like protein kinase) 8	LOC_Os01g53170	retrotransposon protein
TraesCS2A02G266400	1.81004	0.000267431	0.00170512	Up
TraesCS6D02G127700	1.80809	0.000492399	0.0028189	Up	AT1G10370	GSTU17	Glutathione S-transferase U17	LOC_Os10g38670	glutathione S-transferase
TraesCS5A02G185500	1.805	7.65327e-05	0.000608472	Up	AT1G15520	ABCG40	ABC transporter G family member 40	LOC_Os08g29570	pleiotropic drug resistance protein 3
TraesCS3A02G315800	1.80202	0.000313386	0.00194193	Up	AT2G20900	DGK5	Diacylglycerol kinase 5	LOC_Os01g57420	diacylglycerol kinase
TraesCS5A02G020300	1.7975	0.000649021	0.00353566	Up	AT2G07751		NADH:ubiquinone/plastoquinone oxidoreductase%2C chain 3 protein	LOC_Os12g33922	NADH-ubiquinone oxidoreductase chain 3
TraesCS6A02G186900	1.79595	0.00538716	0.0199676	Up	AT4G29735		unknown protein%3B FUNCTIONS IN: molecular_function unknown%3B INVOLVED IN: biological_process unknown%3B LOCATED IN: endomembrane system%3B EXPRESSED IN: 23 plant structures%3B EXPRESSED DURING: 15 growth stages%3B CONTAINS InterPro DOMAIN/s: Uncharacterised p /.../ family UPF0197 (InterPro:IPR007915)%3B Has 30201 Blast hits to 17322 proteins in 780 species: Archae - 12%3B Bacteria - 1396%3B Met…	LOC_Os06g37070	expressed protein
TraesCS1D02G404800	1.79553	3.53979e-07	7.16625e-06	Up	AT1G28480	GRXC9	Glutaredoxin-C9	LOC_Os05g48930	OsGrx_S2 - glutaredoxin subgroup III
TraesCS3B02G313700	1.79465	0.0136898	0.0429331	Up	AT3G16520	UGT88A1	UDP-glycosyltransferase 88A1	LOC_Os01g53420	anthocyanidin 5
TraesCS3A02G022700	1.7923	0.0001962	0.00132119	Up	AT4G37900	GRDP2	Glycine-rich domain-containing protein 2	LOC_Os11g40590	DUF1399 containing protein
TraesCS3B02G403000	1.78991	2.23809e-05	0.000220747	Up	AT1G64310	PCMP-E65	Putative pentatricopeptide repeat-containing protein At1g64310	LOC_Os01g36540	pentatricopeptide
TraesCS3B02G403100	1.78249	0.0114367	0.037057	Up	AT1G51940	LYK3	LysM domain receptor-like kinase 3	LOC_Os01g36550	protein kinase family protein
TraesCS5D02G415200	1.77772	3.74095e-05	0.00033753	Up	AT4G34100	SUD1	Probable E3 ubiquitin ligase SUD1	LOC_Os08g01040	zinc finger
TraesCS5A02G117100	1.77529	0.000544908	0.00306451	Up	ATMG00285	NAD2A	NADH dehydrogenase 2A	LOC_Os04g16742	NADPH-dependent oxidoreductase
TraesCS3D02G077600	1.77444	0.00157855	0.00731889	Up	AT1G15910	FDM1	Factor of DNA methylation 1	LOC_Os01g03570	transcription factor X1
TraesCS1A02G140300	1.77013	7.67214e-06	9.11594e-05	Up	AT2G07751		NADH:ubiquinone/plastoquinone oxidoreductase%2C chain 3 protein	LOC_Os12g33922	NADH-ubiquinone oxidoreductase chain 3
TraesCS1A02G151400	1.76698	0.000844766	0.00439167	Up	AT2G32710	KRP4	Cyclin-dependent kinase inhibitor 4	LOC_Os10g33310	cyclin-dependent kinase inhibitor
TraesCS7A02G276600	1.7637	7.17197e-05	0.000576105	Up	AT5G57880	MPS1	multipolar spindle 1	LOC_Os08g44180	expressed protein
TraesCS7D02G533600	1.76052	1.61548e-06	2.51207e-05	Up
TraesCS7A02G159500	1.75434	0.0138183	0.0432589	Up	AT3G14200		Chaperone DnaJ-domain superfamily protein	LOC_Os06g09560	heat shock protein DnaJ
TraesCS5B02G466000	1.75202	0.0101494	0.0336252	Up
TraesCS6D02G079500	1.7506	1.83089e-07	4.14503e-06	Up	ATCG00270	PSBD	Photosystem II D2 protein	LOC_Os10g41689	photosystem II D2 protein
TraesCS4B02G146500	1.74942	1.77176e-07	4.03041e-06	Up	AT2G07707	YMF19	ATP synthase protein YMF19	LOC_Os12g34018	ATP synthase protein YMF19
TraesCS7D02G338500	1.74906	0.000665028	0.00360627	Up	AT4G29000	TCX5	Protein tesmin/TSO1-like CXC 5	LOC_Os06g22670	tesmin/TSO1-like CXC domain containing protein
TraesCS7D02G239100	1.7463	0.00962907	0.0321861	Up	AT2G07771	CCMC	Cytochrome C assembly protein	LOC_Os12g34012	cytochrome c biosynthesis ccmC-like mitochondrial protein
TraesCS3A02G043500	1.74256	0.0018839	0.00845734	Up	AT3G47110		Putative receptor-like protein kinase At3g47110	LOC_Os01g05960	receptor kinase
TraesCS7D02G121100	1.74132	0.00142903	0.00674108	Up	AT3G16190		Probable inactive nicotinamidase At3g16190	LOC_Os02g17640	isochorismatase family protein
TraesCS3B02G276900	1.73151	0.000425244	0.00250016	Up	AT4G40020		Myosin heavy chain-related protein	LOC_Os08g37500	expressed protein
TraesCS7A02G450500	1.72972	0.013784	0.0431773	Up	AT5G54570	BGLU41	Putative beta-glucosidase 41	LOC_Os06g46940	Os6bglu25 - beta-glucosidase homologue
TraesCS2D02G257100	1.72673	0.0122138	0.0391174	Up	AT4G21620		glycine-rich protein	LOC_Os07g03180	GCRP3 - Glycine and cysteine rich family protein precursor
TraesCS2A02G435900	1.72155	4.56078e-06	5.90321e-05	Up	AT1G31410		putrescine-binding periplasmic protein-related	LOC_Os04g51310	putrescine-binding periplasmic protein-related
TraesCS5A02G334600	1.72105	6.20735e-08	1.65902e-06	Up	AT5G66090		unknown protein%3B FUNCTIONS IN: molecular_function unknown%3B LOCATED IN: chloroplast%2C chloroplast stroma%3B EXPRESSED IN: 21 plant structures%3B EXPRESSED DURING: 13 growth stages%3B Has 30201 Blast hits to 17322 proteins in 780 species: Archae - 12%3B Bacter /.../396%3B Metazoa - 17338%3B Fungi - 3422%3B Plants - 5037%3B Viruses - 0%3B Other Eukaryotes - 2996 (source: NCBI BLink).	LOC_Os09g36990	expressed protein
TraesCS4B02G000900	1.70918	0.000161215	0.00112428	Up
TraesCS7A02G250100	1.70903	0.0048124	0.0182186	Up	AT4G35420	TKPR1	Tetraketide alpha-pyrone reductase 1	LOC_Os08g40440	dihydroflavonol-4-reductase
TraesCS5B02G183500	1.69882	0.000208586	0.001391	Up	AT1G15520	ABCG40	ABC transporter G family member 40	LOC_Os08g29570	pleiotropic drug resistance protein 3
TraesCS1A02G347200	1.69794	0.00269441	0.0113233	Up	AT3G16520	UGT88A1	UDP-glycosyltransferase 88A1	LOC_Os05g45100	anthocyanidin 5
TraesCS7D02G020800	1.69787	0.00212367	0.00931781	Up	AT3G46530	RPP13	Disease resistance protein RPP13	LOC_Os11g27430	NB-ARC domain containing protein
TraesCS7B02G176500	1.69445	0.00146688	0.00688502	Up	AT2G36310	URH1	Uridine nucleosidase 1	LOC_Os08g44370	inosine-uridine preferring nucleoside hydrolase family protein
TraesCS1B02G307700	1.68022	0.000967016	0.00490064	Up	AT5G01670		NAD(P)-linked oxidoreductase superfamily protein	LOC_Os05g39690	oxidoreductase
TraesCS1D02G283300	1.67747	0.00710542	0.025045	Up	AT5G02370		ATP binding microtubule motor family protein	LOC_Os05g38480	kinesin motor domain containing protein
TraesCS6A02G211800	1.67165	0.00618382	0.0223597	Up
TraesCS3A02G149300	1.66924	0.00045672	0.00264987	Up	AT4G27940	MTM1	Mitochondrial carrier protein MTM1	LOC_Os01g12470	mitochondrial carrier protein
TraesCS1A02G298200	1.66806	0.00116992	0.00572785	Up	AT5G01670		NAD(P)-linked oxidoreductase superfamily protein	LOC_Os05g39690	oxidoreductase
TraesCS2D02G334700	1.66696	0.00743501	0.0260026	Up	AT1G15910	FDM1	Factor of DNA methylation 1	LOC_Os01g03570	transcription factor X1
TraesCS1A02G140200	1.66669	2.1109e-07	4.65765e-06	Up	AT2G07675		Ribosomal protein S12/S23 family protein	LOC_Os12g34062	mitochondrial ribosomal protein S12
TraesCS5B02G189300	1.6665	6.07807e-06	7.50421e-05	Up	AT4G33100		Uncharacterized protein At4g33100	LOC_Os09g19750	expressed protein
TraesCS1D02G084900	1.65944	3.37523e-05	0.000310415	Up	AT1G54870		NAD(P)-binding Rossmann-fold superfamily protein	LOC_Os05g04870	oxidoreductase
TraesCS6D02G307100	1.65487	1.34793e-05	0.000145893	Up	AT4G08500	MEKK1	Mitogen-activated protein kinase kinase kinase 1	LOC_Os03g15570	STE_MEKK_ste11_MAP3K.12 - STE kinases include homologs to sterile 7
TraesCS1B02G426900	1.65373	0.00510708	0.0191118	Up				LOC_Os01g34630	retrotransposon protein
TraesCS4A02G186700	1.65366	0.00392861	0.0154	Up	AT4G00340	RLK4	receptor-like protein kinase 4	LOC_Os06g37670	S-locus-like receptor protein kinase
TraesCS6B02G131400	1.64988	1.12533e-05	0.000125569	Up	ATMG00520	MATR	Intron maturase%2C type II family protein	LOC_Os12g33956	maturase
TraesCS4B02G056800	1.64012	2.21573e-08	7.0494e-07	Up	AT4G08170	ITPK3	Inositol-tetrakisphosphate 1-kinase 3	LOC_Os03g51610	Inositol 1
TraesCS2D02G313100	1.63921	8.31061e-06	9.7426e-05	Up	AT1G09900		Pentatricopeptide repeat-containing protein At1g09900	LOC_Os02g35750	pentatricopeptide repeat domain containing protein
TraesCS5B02G163200	1.6376	0.000797052	0.00419076	Up	AT1G05000		Probable tyrosine-protein phosphatase At1g05000	LOC_Os09g05020	tyrosine phosphatase family protein
TraesCS3B02G406700	1.6359	0.00529338	0.019687	Up	AT2G36240		Pentatricopeptide repeat-containing protein At2g36240	LOC_Os01g68070	PPR repeat containing protein
TraesCS1A02G436000	1.63488	0.0130619	0.0413389	Up	AT3G46730	RPP13L3	Putative disease resistance RPP13-like protein 3	LOC_Os08g10440	NBS-LRR disease resistance protein
TraesCS7B02G335000	1.63078	9.07726e-05	0.000700582	Up	AT1G72300	PSYR1	Tyrosine-sulfated glycopeptide receptor 1	LOC_Os06g47650	phytosulfokine receptor precursor
TraesCS4B02G090700	1.62944	6.02234e-05	0.00049973	Up	AT1G33420		PHD finger protein At1g33420	LOC_Os11g12650	PHD-finger domain containing protein
TraesCS2A02G216600	1.62903	1.07101e-05	0.000120372	Up	AT4G23180	CRK10	Cysteine-rich receptor-like protein kinase 10	LOC_Os07g35280	TKL_IRAK_DUF26-lc.1 - DUF26 kinases have homology to DUF26 containing loci
TraesCS1D02G420800	1.62278	0.000404474	0.00239919	Up	AT2G25605		unknown protein%3B FUNCTIONS IN: molecular_function unknown%3B INVOLVED IN: biological_process unknown%3B LOCATED IN: chloroplast%3B Has 75 Blast hits to 75 proteins in 20 species: Archae - 2%3B Bacteria - 4%3B Metazoa - 0%3B Fungi - 0%3B Plants - 36%3B Viruses - 0%3B /.../Eukaryotes - 33 (source: NCBI BLink).	LOC_Os05g49910	expressed protein
TraesCS5A02G522600	1.61822	0.000476695	0.00274476	Up	AT1G08630	THA1	Probable low-specificity L-threonine aldolase 1	LOC_Os04g43650	L-allo-threonine aldolase
TraesCS3B02G425000	1.61802	0.00226189	0.00981385	Up	AT3G51895	SULTR3%3B1	Sulfate transporter 3.1	LOC_Os03g06520	sulfate transporter
TraesCS2A02G098600	1.61615	8.29833e-08	2.12495e-06	Up	AT1G08400	MAG2L	RINT1-like protein MAG2L	LOC_Os07g48720	MAG2
TraesCS4D02G101100	1.607	0.000417288	0.00246118	Up	AT4G33467		unknown protein%3B Has 25 Blast hits to 25 proteins in 9 species: Archae - 0%3B Bacteria - 0%3B Metazoa - 0%3B Fungi - 0%3B Plants - 25%3B Viruses - 0%3B Other Eukaryotes - 0 (source: NCBI BLink).	LOC_Os12g08700	expressed protein
TraesCS1B02G237400	1.60697	0.00285813	0.0118815	Up	AT3G51810	EM1	Em-like protein GEA1	LOC_Os05g28210	small hydrophilic plant seed protein
TraesCS2D02G417100	1.59964	6.16138e-05	0.000508995	Up	AT4G38810		Calcium-binding EF-hand family protein	LOC_Os10g09850	EF hand family protein
TraesCS3A02G121600	1.59453	7.84633e-05	0.000620956	Up	AT5G19950		Domain of unknown function (DUF1767)	LOC_Os01g08280	expressed protein
TraesCSU02G174100	1.59412	0.000511266	0.00290811	Up	ATCG00120	ATPA	ATP synthase subunit alpha%2C chloroplastic	LOC_Os04g16740	ATP synthase subunit alpha
TraesCS3D02G113500	1.59105	0.014784	0.0456936	Up				LOC_Os05g41160	expressed protein
TraesCS6B02G234700	1.59085	0.00398557	0.0155885	Up	AT2G07675		Ribosomal protein S12/S23 family protein	LOC_Os12g34062	mitochondrial ribosomal protein S12
TraesCS1A02G098000	1.58733	0.00391846	0.0153679	Up
TraesCS4A02G066100	1.58593	2.50959e-05	0.000242503	Up	AT2G32120	HSP70-8	Heat shock 70 kDa protein 8	LOC_Os03g11910	DnaK family protein
TraesCS2B02G137900	1.58544	0.0101152	0.033533	Up	AT5G18630		alpha/beta-Hydrolases superfamily protein	LOC_Os07g47250	lipase precursor
TraesCS4A02G378100	1.58196	0.00100631	0.00506423	Up	AT2G18030	MSRA5	Peptide methionine sulfoxide reductase A5	LOC_Os06g04650	peptide methionine sulfoxide reductase
TraesCS3A02G244300	1.57974	0.000179475	0.00122732	Up	AT2G21860		violaxanthin de-epoxidase-related	LOC_Os01g51860	violaxanthin de-epoxidase
TraesCS1B02G072700	1.57597	0.00470436	0.0178863	Up	AT5G64320		Pentatricopeptide repeat-containing protein At5g64320%2C mitochondrial	LOC_Os04g28234	Rf1
TraesCS1D02G106100	1.5751	0.00356003	0.0142182	Up	AT5G26930	GATA23	GATA transcription factor 23	LOC_Os05g06340	GATA zinc finger domain containing protein
TraesCS5D02G099800	1.56913	0.00638201	0.022952	Up	AT3G17170	RFC3	Translation elongation factor EF1B/ribosomal protein S6 family protein	LOC_Os12g37610	ribosomal protein S6
TraesCS2D02G279200	1.56799	0.00118657	0.00579677	Up	AT3G25070	RIN4	RPM1-interacting protein 4	LOC_Os04g31030	nitrate-induced NOI protein
TraesCS2B02G596600	1.56466	9.84286e-06	0.000112142	Up	AT3G47160		RING/U-box superfamily protein	LOC_Os07g46700	zinc finger
TraesCS6D02G083400	1.56076	0.00274403	0.0114901	Up	AT1G12620		Pentatricopeptide repeat-containing protein At1g12620	LOC_Os10g35230	Rf1
TraesCS1A02G236400	1.55977	1.01438e-05	0.000114949	Up	AT4G15563		unknown protein%3B Has 36 Blast hits to 36 proteins in 12 species: Archae - 0%3B Bacteria - 0%3B Metazoa - 0%3B Fungi - 0%3B Plants - 36%3B Viruses - 0%3B Other Eukaryotes - 0 (source: NCBI BLink).	LOC_Os05g30920	OsFBX167 - F-box domain containing protein
TraesCS4B02G079100	1.5596	0.00182711	0.0082477	Up	AT1G47710		Serpin-ZX	LOC_Os03g41438	serpin domain containing protein
TraesCS6A02G397300	1.55862	4.76399e-10	2.74388e-08	Up	ATMG00516	NAD1C	NADH dehydrogenase 1C	LOC_Os10g21396	NADPH-dependent oxidoreductase
TraesCS2D02G315000	1.55792	0.001049	0.00523794	Up	AT1G14140	PUMP3	Mitochondrial uncoupling protein 3	LOC_Os04g37630	mitochondrial carrier protein
TraesCS2B02G111300	1.55178	0.00819716	0.0281813	Up	AT1G57790		F-box/kelch-repeat protein At1g57790	LOC_Os08g34860	OsFBX293 - F-box domain containing protein
TraesCS7A02G407800	1.54981	0.00844757	0.0288881	Up	AT4G19390		Uncharacterised protein family (UPF0114)	LOC_Os06g49640	uncharacterized UPF0114 domain containing protein
TraesCS7B02G243800	1.54762	0.000115907	0.000858149	Up				LOC_Os02g02250	expressed protein
TraesCSU02G149800	1.54635	0.000425718	0.00250249	Up	ATCG00900	RPS7-A	30S ribosomal protein S7%2C chloroplastic	LOC_Os04g16856	chloroplast 30S ribosomal protein S7
TraesCS1D02G047800	1.545	0.000718134	0.00384278	Up				LOC_Os05g02970	expressed protein
TraesCS1D02G107000	1.54472	6.35018e-08	1.69242e-06	Up	AT1G52870		Peroxisomal membrane 22 kDa (Mpv17/PMP22) family protein	LOC_Os03g38730	peroxisomal membrane protein
TraesCS1B02G131400	1.54083	0.00915961	0.0308905	Up	AT5G02320	ATMYB3R5	myb domain protein 3r-5	LOC_Os01g62410	MYB family transcription factor
TraesCS1A02G164700	1.5383	0.000145469	0.00103338	Up	AT3G02690		WAT1-related protein At3g02690%2C chloroplastic	LOC_Os10g35140	integral membrane protein
TraesCS1D02G109300	1.53777	0.00798994	0.027593	Up	AT1G48110	ECT7	evolutionarily conserved C-terminal region 7	LOC_Os01g22630	ECT protein
TraesCS1D02G361500	1.53639	0.00884911	0.030011	Up	AT1G71710		DNAse I-like superfamily protein	LOC_Os01g51890	endonuclease/exonuclease/phosphatase family domain containing protein
TraesCS3D02G173600	1.53397	0.00036123	0.00218397	Up	ATMG00516	NAD1C	NADH dehydrogenase 1C	LOC_Os10g21396	NADPH-dependent oxidoreductase
TraesCS5A02G122700	1.53017	7.07176e-08	1.84833e-06	Up	AT5G40440	MKK3	Mitogen-activated protein kinase kinase 3	LOC_Os06g27890	STE_MEK_ste7_MAP2K.8 - STE kinases include homologs to sterile 7
TraesCS5D02G362400	1.52997	2.24822e-05	0.000221678	Up	AT2G44360		unknown protein%3B Has 23 Blast hits to 23 proteins in 10 species: Archae - 0%3B Bacteria - 0%3B Metazoa - 0%3B Fungi - 0%3B Plants - 23%3B Viruses - 0%3B Other Eukaryotes - 0 (source: NCBI BLink).	LOC_Os09g38080	retrotransposon protein
TraesCS4A02G380100	1.52919	0.000371586	0.00223475	Up	AT5G47090		unknown protein%3B CONTAINS InterPro DOMAIN/s: Protein of unknown function DUF2052%2C coiled-coil (InterPro:IPR018613)%3B Has 30201 Blast hits to 17322 proteins in 780 species: Archae - 12%3B Bacteria - 1396%3B Metazoa - 17338%3B Fungi - 3422%3B Plants - 5037%3B Vi /.../- 0%3B Other Eukaryotes - 2996 (source: NCBI BLink).	LOC_Os06g04780	coiled-coil domain-containing protein 97
TraesCS5D02G032169	1.52894	0.000888803	0.00457616	Up
TraesCS1D02G152700	1.52807	0.000120609	0.000886105	Up
TraesCS1B02G385600	1.52757	0.00181232	0.00819188	Up	ATCG00890	NDHB.1	NADH-Ubiquinone/plastoquinone (complex I) protein	LOC_Os07g25004	NADPH-dependent oxidoreductase
TraesCS4A02G257700	1.52661	4.207e-05	0.000371548	Up	AT4G08170	ITPK3	Inositol-tetrakisphosphate 1-kinase 3	LOC_Os03g51610	Inositol 1
TraesCS2D02G274700	1.52631	1.71665e-05	0.000177367	Up	AT3G23670	KIN12B	Kinesin-like protein KIN12B	LOC_Os04g28260	Kinesin motor domain domain containing protein
TraesCS2B02G617600	1.52397	8.97355e-07	1.54303e-05	Up	AT1G71900		Probable magnesium transporter NIPA4	LOC_Os01g65986	DUF803 domain containing
TraesCS5D02G457600	1.52336	0.00468033	0.0178111	Up	ATCG00890	NDHB.1	NADH-Ubiquinone/plastoquinone (complex I) protein	LOC_Os07g25004	NADPH-dependent oxidoreductase
TraesCS2D02G273600	1.51794	0.0146602	0.0453891	Up	AT1G60710	ATB2	Probable aldo-keto reductase 4	LOC_Os04g26910	oxidoreductase
TraesCS4B02G137900	1.51648	0.0149504	0.0461103	Up	AT3G25690	CHUP1	Protein CHUP1%2C chloroplastic	LOC_Os11g01439	chloroplast unusual positioning protein
TraesCS2D02G572900	1.51605	2.85387e-07	6.00306e-06	Up	ATCG00280	PSBC	Photosystem II CP43 reaction center protein	LOC_Os02g24632	photosystem II 44 kDa reaction center protein
TraesCS1D02G225800	1.51406	0.00478536	0.0181383	Up	AT3G51810	EM1	Em-like protein GEA1	LOC_Os05g28210	small hydrophilic plant seed protein
TraesCS5D02G015600	1.51367	0.0032564	0.0132292	Up	AT5G11730		Core-2/I-branching beta-1%2C6-N-acetylglucosaminyltransferase family protein	LOC_Os12g43880	DNA binding protein
TraesCS5A02G141700	1.51241	0.00013563	0.000975359	Up	AT3G54320	WRI1	Ethylene-responsive transcription factor WRI1	LOC_Os11g03540	AP2 domain containing protein
TraesCS7B02G043600	1.50843	0.0118652	0.03821	Up	AT5G60370		Exonuclease V%2C chloroplastic	LOC_Os05g03200	expressed protein
TraesCS7D02G153700	1.50654	0.0130051	0.0411936	Up	AT1G11330		G-type lectin S-receptor-like serine/threonine-protein kinase At1g11330	LOC_Os04g54120	serine/threonine-protein kinase receptor precursor
TraesCS2A02G303200	1.50438	0.000324891	0.00200066	Up	AT2G15570	GAT1	Thioredoxin M3%2C chloroplastic	LOC_Os04g36640	dehydration-responsive element-binding protein
TraesCS4B02G033900	1.50423	0.0120478	0.0386787	Up	AT3G26360		Ribosomal protein S21 family protein	LOC_Os03g48830	ribosomal protein-related
TraesCS4A02G121200	1.50287	0.00451663	0.0172979	Up	AT3G62390	TBL6	Protein trichome birefringence-like 6	LOC_Os03g19470	proteins of unknown function domain containing protein
TraesCS6D02G129400	1.50156	0.000907093	0.00465314	Up	AT3G23290	LSH4	Protein LIGHT-DEPENDENT SHORT HYPOCOTYLS 4	LOC_Os02g07030	DUF640 domain containing protein
TraesCS7D02G238200	1.5012	0.000828446	0.00432383	Up				LOC_Os09g30350	expressed protein
TraesCS7D02G340400	1.49855	0.000535037	0.0030176	Up	AT3G22490		Seed maturation protein	LOC_Os06g23350	late embryogenesis abundant protein D-34
TraesCS5D02G281700	1.49612	0.0149821	0.0461836	Up				LOC_Os09g32130	expressed protein
TraesCS2A02G197400	1.49307	0.0130169	0.041224	Up	AT3G56720		unknown protein%3B Has 6239 Blast hits to 4635 proteins in 365 species: Archae - 6%3B Bacteria - 230%3B Metazoa - 3389%3B Fungi - 659%3B Plants - 656%3B Viruses - 13%3B Other Eukaryotes - 1286 (source: NCBI BLink).	LOC_Os10g34660	expressed protein
TraesCS5B02G098300	1.4886	0.000179897	0.00122937	Up	AT5G63310	NDPK2	Nucleoside diphosphate kinase II%2C chloroplastic	LOC_Os12g36194	nucleoside diphosphate kinase
TraesCS6D02G200700	1.48795	0.000877752	0.00453108	Up	AT1G77750	RPS13	Small ribosomal subunit protein S13%2C mitochondrial	LOC_Os03g49710	ribosomal protein S13p/S18e
TraesCS7A02G098200	1.48779	2.5138e-09	1.10623e-07	Up	AT2G07671		ATP synthase subunit C family protein	LOC_Os12g34108	ATP synthase protein 9
TraesCS4A02G075900	1.48668	0.0159104	0.0485239	Up	AT2G02040	NPF8.3	Protein NRT1/ PTR FAMILY 8.3	LOC_Os01g04950	peptide transporter PTR2
TraesCSU02G151300	1.48526	3.06357e-09	1.30396e-07	Up	ATMG01360	COX1	Cytochrome c oxidase subunit 1	LOC_Os12g33946	cytochrome c oxidase subunit 1
TraesCS3B02G275100	1.48169	0.00630925	0.0227378	Up	AT3G12630	SAP5	Zinc finger A20 and AN1 domain-containing stress-associated protein 5	LOC_Os01g52030	zinc finger A20 and AN1 domain-containing stress-associated protein
TraesCS7B02G348600	1.47721	3.79507e-05	0.000341209	Up	AT4G21490	NDB3	External alternative NAD(P)H-ubiquinone oxidoreductase B3%2C mitochondrial	LOC_Os06g47000	external NADH-ubiquinone oxidoreductase 1
TraesCS4D02G139300	1.4769	1.74885e-05	0.000180183	Up	ATMG00060	NAD5C	NADH dehydrogenase subunit 5C
TraesCS5B02G355100	1.47535	5.00483e-11	3.89637e-09	Up	AT2G17530		Protein kinase superfamily protein	LOC_Os09g37949	serine/threonine-protein kinase SRPK1
TraesCS5A02G163600	1.47503	1.15209e-06	1.89771e-05	Up	AT4G30780		unknown protein%3B BEST Arabidopsis thaliana protein match is: unknown protein (TAIR:AT2G24100.1)%3B Has 109 Blast hits to 109 proteins in 18 species: Archae - 0%3B Bacteria - 0%3B Metazoa - 1%3B Fungi - 0%3B Plants - 95%3B Viruses - 0%3B Other Eukaryotes - 13 (sou /.../CBI BLink).	LOC_Os09g04160	expressed protein
TraesCS2D02G433300	1.4733	0.0110329	0.0359936	Up	AT3G22150	PCMP-E95	Pentatricopeptide repeat-containing protein At3g22150%2C chloroplastic	LOC_Os04g51350	pentatricopeptide
TraesCS6B02G037000	1.47286	0.000595373	0.00329493	Up	AT3G45090		P-loop NTPase domain-containing protein LPA1 homolog 2	LOC_Os09g39870	2-phosphoglycerate kinase-related
TraesCS5D02G343000	1.47269	1.28239e-08	4.44085e-07	Up	AT4G38470		ACT-like protein tyrosine kinase family protein	LOC_Os09g37230	protein kinase family protein
TraesCS2B02G273500	1.46907	0.000266429	0.00170008	Up	AT3G59060	PIF5	Transcription factor PIF5	LOC_Os07g05010	helix-loop-helix DNA-binding domain containing protein
TraesCS2A02G337600	1.46899	0.000804708	0.00422258	Up	AT3G25805		unknown protein%3B Has 98 Blast hits to 98 proteins in 45 species: Archae - 0%3B Bacteria - 51%3B Metazoa - 0%3B Fungi - 0%3B Plants - 43%3B Viruses - 0%3B Other Eukaryotes - 4 (source: NCBI BLink).	LOC_Os04g38850	expressed protein
TraesCS6D02G354300	1.46724	0.0098221	0.0327276	Up	AT5G56820		Putative FBD-associated F-box protein At5g56820	LOC_Os06g36220	OsFBX198 - F-box domain containing protein
TraesCS4D02G278200	1.46588	0.000753132	0.00399867	Up	AT1G06730		pfkB-like carbohydrate kinase family protein	LOC_Os03g06880	kinase
TraesCS2D02G176500	1.46557	0.000229447	0.00150415	Up	AT1G48410	AGO1	Protein argonaute 1	LOC_Os03g58600	PAZ domain containing protein
TraesCS5A02G153900	1.46175	0.00138857	0.00658762	Up	AT3G47340	ASN1	Asparagine synthetase	LOC_Os06g15420	asparagine synthetase
TraesCS2B02G383700	1.45531	0.00194608	0.00868137	Up	AT3G06190	BPM2	BTB/POZ and MATH domain-containing protein 2	LOC_Os08g13030	MBTB21 - Bric-a-Brac
TraesCS5D02G407400	1.44997	0.00172893	0.00788454	Up	AT4G37330	CYP81D4	cytochrome P450%2C family 81%2C subfamily D%2C polypeptide 4	LOC_Os03g55240	cytochrome P450
TraesCS7B02G156500	1.4477	0.000196077	0.00132074	Up	AT1G15680		Putative F-box/kelch-repeat protein At1g15680	LOC_Os08g41750	OsFBX303 - F-box domain containing protein
TraesCS6B02G316400	1.44753	0.000479168	0.00275682	Up	AT5G47680	TRM10	FUNCTIONS IN: molecular_function unknown%3B INVOLVED IN: biological_process unknown%3B LOCATED IN: cellular_component unknown%3B EXPRESSED IN: 23 plant structures%3B EXPRESSED DURING: 13 growth stages%3B CONTAINS InterPro DOMAIN/s: tRNA (guanine-N1-)-methyltr /.../ase (InterPro:IPR016009)%2C tRNA (guanine-N(1)-)-methyltransferase%2C metazoa (InterPro:IPR016653)%2C tRNA (guanine-N1-)-methyltransfe…	LOC_Os02g49360	RNA methyltransferase domain-containing protein 2
TraesCS2B02G133900	1.44578	0.00199666	0.00885571	Up	AT2G32630		Pentatricopeptide repeat-containing protein At2g32630	LOC_Os07g47470	pentatricopeptide
TraesCS2D02G055600	1.44394	0.00271007	0.0113765	Up	AT3G62700	ABCC14	ABC transporter C family member 14	LOC_Os04g13210	multidrug resistance-associated protein
TraesCS4D02G150300	1.44204	9.87303e-10	5.01034e-08	Up	AT3G02570	PMI1	Mannose-6-phosphate isomerase 1	LOC_Os11g38810	mannose-6-phosphate isomerase
TraesCS2B02G350500	1.44148	0.00166363	0.00763343	Up	AT5G47810	PFK2	ATP-dependent 6-phosphofructokinase 2	LOC_Os09g30240	phosphofructokinase
TraesCS5D02G222300	1.4409	0.0115183	0.0372754	Up	AT1G56220		Dormancy/auxin associated family protein	LOC_Os09g26620	auxin-repressed protein
TraesCS5A02G082200	1.43794	1.02337e-05	0.000115843	Up	AT5G07710	NEN1	Protein NEN1	LOC_Os10g26730	exonuclease
TraesCSU02G128200	1.43625	0.00723753	0.0254237	Up	AT5G39110	GLP6	Germin-like protein subfamily 1 member 14	LOC_Os08g08990	Cupin domain containing protein
TraesCS4B02G283700	1.43596	0.00250098	0.010657	Up	AT1G13990		unknown protein%3B FUNCTIONS IN: molecular_function unknown%3B INVOLVED IN: biological_process unknown%3B LOCATED IN: chloroplast%3B EXPRESSED IN: 23 plant structures%3B EXPRESSED DURING: 13 growth stages%3B CONTAINS InterPro DOMAIN/s: Protein of unknown functi /.../3110 (InterPro:IPR021503)%3B Has 25 Blast hits to 25 proteins in 8 species: Archae - 0%3B Bacteria - 0%3B Metazoa - 0%3B Fungi - 0%3…	LOC_Os03g07190	expressed protein
TraesCS6A02G170700	1.43584	6.05596e-07	1.11617e-05	Up	AT3G30390		Transmembrane amino acid transporter family protein	LOC_Os02g09810	amino acid transporter
TraesCS1B02G251300	1.4315	1.79938e-07	4.0854e-06	Up	AT2G38800		Plant calmodulin-binding protein-related	LOC_Os05g31690	expressed protein
TraesCS2D02G336200	1.43029	4.42211e-05	0.000387189	Up	ATMG00160	COX2	cytochrome oxidase 2
TraesCS7B02G116600	1.42191	0.00234532	0.010105	Up	AT4G28390	AAC3	ADP%2CATP carrier protein 3%2C mitochondrial	LOC_Os05g23720	mitochondrial carrier protein
TraesCS2D02G573000	1.42052	1.40588e-05	0.000151003	Up	ATCG00280	PSBC	Photosystem II CP43 reaction center protein	LOC_Os04g16874	photosystem II 44 kDa reaction center protein
TraesCS2A02G100800	1.41823	0.00162824	0.00750118	Up	AT5G39660	CDF2	Cyclic dof factor 2	LOC_Os07g48570	expressed protein
TraesCS1A02G031200	1.41809	1.49397e-09	7.16335e-08	Up	AT5G02290	NAK	Probable serine/threonine-protein kinase NAK	LOC_Os05g02020	protein kinase APK1A
TraesCS2D02G211400	1.41533	2.21673e-06	3.27093e-05	Up	AT5G03720	HSFA3	Heat stress transcription factor A-3	LOC_Os02g32590	HSF-type DNA-binding domain containing protein
TraesCSU02G147900	1.41338	0.00126189	0.00609251	Up	ATCG00120	ATPA	ATP synthase subunit alpha%2C chloroplastic	LOC_Os04g16740	ATP synthase subunit alpha
TraesCS2A02G552700	1.41318	0.0073795	0.0258381	Up	AT4G01990		Pentatricopeptide repeat-containing protein At4g01990%2C mitochondrial	LOC_Os01g19490	pentatricopeptide
TraesCS2A02G287700	1.41221	1.5131e-05	0.000160089	Up	AT5G51330	DYAD	Protein DYAD	LOC_Os12g42820	SWITCH1 splice variant S
TraesCS3B02G309300	1.40542	0.00281099	0.0117202	Up	AT2G19900	NADP-ME1	NADP-dependent malic enzyme 1	LOC_Os05g09440	NADP-dependent malic enzyme
TraesCS4A02G169700	1.40459	0.00134827	0.00643575	Up	AT2G47500		P-loop nucleoside triphosphate hydrolases superfamily protein with CH (Calponin Homology) domain	LOC_Os11g44880	kinesin-4
TraesCS5D02G457500	1.4034	0.000972205	0.00492291	Up	ATCG00900	RPS7-A	30S ribosomal protein S7%2C chloroplastic	LOC_Os04g16856	chloroplast 30S ribosomal protein S7
TraesCS4A02G278500	1.40126	0.00624257	0.0225395	Up	AT3G11710	ATKRS-1	Lysine--tRNA ligase	LOC_Os03g38980	tRNA synthetases class II domain containing protein
TraesCS7A02G563900	1.39931	6.71664e-05	0.000545916	Up				LOC_Os07g36910	OsFBX254 - F-box domain containing protein
TraesCS7B02G066600	1.39919	0.00276896	0.0115755	Up	AT3G18110	EMB1270	Pentatricopeptide repeat-containing protein At3g18110%2C chloroplastic	LOC_Os06g09880	EMB1270
TraesCS6D02G030100	1.39812	0.0155536	0.047643	Up	AT3G45090		P-loop NTPase domain-containing protein LPA1 homolog 2	LOC_Os09g39870	2-phosphoglycerate kinase-related
TraesCSU02G177800	1.39804	1.01931e-05	0.000115452	Up	AT2G07734		Alpha-L RNA-binding motif/Ribosomal protein S4 family protein	LOC_Os04g16738	chloroplast 30S ribosomal protein S4
TraesCS7D02G362900	1.39619	0.00792322	0.0274046	Up	AT2G02150		Putative pentatricopeptide repeat-containing protein At2g02150	LOC_Os06g36910	pentatricopeptide
TraesCS7D02G176700	1.39308	0.00085692	0.00444388	Up	AT2G22540	SVP	MADS-box protein SVP	LOC_Os02g52340	OsMADS22 - MADS-box family gene with MIKCc type-box
TraesCS4D02G237300	1.39286	0.00524891	0.0195538	Up	AT4G37750	ANT	AP2-like ethylene-responsive transcription factor ANT	LOC_Os03g56050	AP2-like ethylene-responsive transcription factor AINTEGUMENTA
TraesCS4B02G228000	1.39119	1.8131e-11	1.63293e-09	Up	AT2G17840	ERD7	Senescence/dehydration-associated protein-related	LOC_Os03g13840	senescence-associated protein
TraesCS2D02G117100	1.39061	1.89461e-05	0.000192397	Up	AT5G18630		alpha/beta-Hydrolases superfamily protein	LOC_Os07g47250	lipase precursor
TraesCS5D02G532100	1.38733	0.0163005	0.0494924	Up	AT3G23700		Nucleic acid-binding proteins superfamily	LOC_Os03g62780	S1 RNA binding domain containing protein
TraesCS5A02G123600	1.3862	0.000808461	0.00423922	Up	AT2G43710	FAB2	Acyl-	LOC_Os04g31070	acyl-desaturase
TraesCS7D02G405800	1.38598	0.00831011	0.0285137	Up	AT1G22370	UGT85A5	UDP-glycosyltransferase 85A5	LOC_Os07g30620	cytokinin-O-glucosyltransferase 2
TraesCS3B02G387800	1.38396	0.00130184	0.00625352	Up	AT3G09550		Ankyrin repeat family protein	LOC_Os01g61990	ankyrin repeat-containing protein
TraesCS5D02G020600	1.3817	0.00388792	0.015276	Up	AT2G22750	BHLH18	Transcription factor bHLH18	LOC_Os12g43620	helix-loop-helix DNA-binding domain containing protein
TraesCS3B02G173600	1.38021	5.43367e-05	0.000459947	Up	ATMG01360	COX1	Cytochrome c oxidase subunit 1	LOC_Os12g33946	cytochrome c oxidase subunit 1
TraesCS6A02G242400	1.37875	0.00192768	0.00861793	Up	AT4G17550		Putative glycerol-3-phosphate transporter 4	LOC_Os02g43620	transporter
TraesCS6A02G114300	1.37676	0.011897	0.0382956	Up	ATCG00890	NDHB.1	NADH-Ubiquinone/plastoquinone (complex I) protein	LOC_Os07g25004	NADPH-dependent oxidoreductase
TraesCS2B02G587700	1.37668	2.279e-05	0.000224199	Up				LOC_Os05g44792	expressed protein
TraesCS2A02G286100	1.37463	0.00861114	0.0293347	Up				LOC_Os04g32430	expressed protein
TraesCS5A02G370700	1.37299	0.00975638	0.0325416	Up	AT3G11850		Protein of unknown function%2C DUF593	LOC_Os03g44800	DUF593 domain containing protein
TraesCS3B02G521000	1.37263	0.0123238	0.0393909	Up	AT5G59900		Putative pentatricopeptide repeat-containing protein At5g59900	LOC_Os01g06000	PPR repeat containing protein
TraesCS2D02G547200	1.37263	0.001172	0.00573655	Up				LOC_Os08g38620	expressed protein
TraesCS4D02G203400	1.36837	0.00172201	0.00785829	Up	AT3G62830	UXS2	UDP-glucuronic acid decarboxylase 2	LOC_Os03g17230	NAD dependent epimerase/dehydratase family domain containing protein
TraesCS5D02G160600	1.36596	0.0125731	0.0400624	Up	AT5G60250		zinc finger (C3HC4-type RING finger) family protein	LOC_Os11g01240	IBR domain containing protein
TraesCS5B02G185000	1.36248	3.14605e-05	0.000293324	Up	AT1G78590	NADK3	NADH kinase	LOC_Os09g17680	NAD kinase
TraesCS3B02G403900	1.36027	0.00525823	0.0195847	Up	AT3G17490		Putative F-box protein At3g17490	LOC_Os02g35560	OsFBX53 - F-box domain containing protein
TraesCS7D02G133100	1.35986	0.00833364	0.0285794	Up	AT5G04360	PU1	Pullulanase 1%2C chloroplastic	LOC_Os08g40930	Alpha amylase
TraesCSU02G040600	1.35596	5.65261e-06	7.04775e-05	Up	AT5G65760		Serine carboxypeptidase S28 family protein	LOC_Os01g56150	OsProCP1 - Putative Lysosomal Pro-x Carboxypeptidase homologue
TraesCS4D02G047400	1.35478	0.0114625	0.0371254	Up	AT1G66200	GLN1-2	Glutamine synthetase cytosolic isozyme 1-2	LOC_Os03g50490	glutamine synthetase
TraesCS7D02G300600	1.35241	0.0156283	0.0478238	Up
TraesCS5A02G438800	1.35053	0.000263064	0.00168282	Up	AT3G22850		Aluminium induced protein with YGL and LRDR motifs	LOC_Os03g58170	stem-specific protein TSJT1
TraesCS7A02G098100	1.34837	5.5203e-05	0.000465989	Up	ATMG01360	COX1	Cytochrome c oxidase subunit 1	LOC_Os12g33946	cytochrome c oxidase subunit 1
TraesCS4B02G264600	1.34753	0.00368474	0.014614	Up				LOC_Os03g24200	OsFBX85 - F-box domain containing protein
TraesCS5A02G117000	1.34526	6.72583e-08	1.77488e-06	Up	ATMG00285	NAD2A	NADH dehydrogenase 2A	LOC_Os04g16742	NADPH-dependent oxidoreductase
TraesCS7D02G547400	1.34518	0.00327288	0.0132855	Up	AT3G15360	ATHM4	Thioredoxin M4%2C chloroplastic	LOC_Os12g08730	thioredoxin
TraesCS3A02G495300	1.34332	0.00408761	0.0159271	Up	AT3G21070	NADK1	NAD(H) kinase 1	LOC_Os01g72690	NAD kinase
TraesCS1A02G140100	1.34318	2.37393e-07	5.14221e-06	Up	AT2G07707	YMF19	ATP synthase protein YMF19	LOC_Os12g34018	ATP synthase protein YMF19
TraesCS2A02G104400	1.34267	0.000813639	0.00426259	Up	AT3G11290		unknown protein%3B BEST Arabidopsis thaliana protein match is: unknown protein (TAIR:AT3G11310.1)%3B Has 720 Blast hits to 435 proteins in 28 species: Archae - 0%3B Bacteria - 2%3B Metazoa - 0%3B Fungi - 32%3B Plants - 682%3B Viruses - 0%3B Other Eukaryotes - 4 (so /.../NCBI BLink).	LOC_Os07g45920	retrotransposon protein
TraesCS7A02G379800	1.34262	0.00344616	0.0138463	Up	AT5G60610		FBD-associated F-box protein At5g60610	LOC_Os01g41310	OsFBX18 - F-box domain containing protein
TraesCS5A02G322900	1.34133	0.00713078	0.0251167	Up	AT1G29760		Putative adipose-regulatory protein (Seipin)	LOC_Os09g36360	protein of unknown function containing protein
TraesCS6D02G149300	1.34111	0.00814888	0.0280468	Up	AT1G23240	PXG7	Probable peroxygenase 7	LOC_Os06g14324	caleosin related protein
TraesCS4A02G048800	1.34091	0.0107175	0.0351508	Up
TraesCSU02G050300	1.3401	9.9394e-07	1.67804e-05	Up	ATMG00180	CCB452	cytochrome C biogenesis 452
TraesCS6A02G121400	1.33972	0.000693952	0.00373511	Up	AT5G24870		RING/U-box superfamily protein	LOC_Os02g05692	zinc finger
TraesCS1D02G258200	1.33906	9.72826e-08	2.44086e-06	Up	ATMG00090		structural constituent of ribosome%3Bprotein binding	LOC_Os12g34054	mitochondrial ribosomal protein S3
TraesCS1B02G353200	1.33662	3.98358e-06	5.28019e-05	Up	ATMG01190	ATP1	ATP synthase subunit 1	LOC_Os09g08910	ATP synthase
TraesCS5A02G372000	1.33577	0.0134418	0.0423122	Up	AT3G46100	ATHRS1	Histidyl-tRNA synthetase 1	LOC_Os02g51830	tRNA synthetase class II core domain containing protein
TraesCS5B02G135500	1.33308	1.74689e-06	2.68295e-05	Up	AT1G73350		unknown protein%3B FUNCTIONS IN: molecular_function unknown%3B INVOLVED IN: biological_process unknown%3B LOCATED IN: nucleus%3B EXPRESSED IN: 25 plant structures%3B EXPRESSED DURING: 15 growth stages%3B Has 46 Blast hits to 46 proteins in 19 species: Archae - /.../teria - 0%3B Metazoa - 3%3B Fungi - 3%3B Plants - 36%3B Viruses - 0%3B Other Eukaryotes - 4 (source: NCBI BLink).	LOC_Os02g42540	expressed protein
TraesCS3D02G308100	1.33251	5.86452e-05	0.00048955	Up	AT4G17650		Polyketide cyclase / dehydrase and lipid transport protein	LOC_Os01g56560	cyclase/dehydrase family protein
TraesCS5B02G280600	1.33239	0.00329029	0.0133383	Up	AT5G02910		F-box/LRR-repeat protein At5g02910	LOC_Os09g32580	expressed protein
TraesCS6D02G369100	1.32915	6.05642e-07	1.11617e-05	Up	AT2G02230	PP2B1	F-box protein PP2-B1	LOC_Os02g56840	OsFBX70 - F-box domain containing protein
TraesCS7D02G392300	1.32714	0.00123316	0.00597601	Up	AT5G39600		CONTAINS InterPro DOMAIN/s: Ribosomal protein L53%2C mitochondrial (InterPro:IPR019716)%3B Has 50 Blast hits to 50 proteins in 19 species: Archae - 0%3B Bacteria - 0%3B Metazoa - 6%3B Fungi - 0%3B Plants - 42%3B Viruses - 0%3B Other Eukaryotes - 2 (source: NCBI BLink).	LOC_Os02g18090	expressed protein
TraesCS3D02G412600	1.32656	0.000108322	0.000811567	Up	AT1G70610	ABCB26	ABC transporter B family member 26%2C chloroplastic	LOC_Os01g68330	antigen peptide transporter-like 1
TraesCS1A02G358000	1.32643	0.00763805	0.0265793	Up	AT4G09720	RABG3A	Ras-related protein RABG3a	LOC_Os05g46000	ras-related protein
TraesCS5B02G357100	1.32634	0.00964418	0.032223	Up	AT2G17270	MPT1	Mitochondrial phosphate carrier protein 1%2C mitochondrial	LOC_Os09g38100	phosphate carrier protein
TraesCS1D02G236000	1.32521	0.000113761	0.000844899	Up	AT4G15563		unknown protein%3B Has 36 Blast hits to 36 proteins in 12 species: Archae - 0%3B Bacteria - 0%3B Metazoa - 0%3B Fungi - 0%3B Plants - 36%3B Viruses - 0%3B Other Eukaryotes - 0 (source: NCBI BLink).	LOC_Os05g30920	OsFBX167 - F-box domain containing protein
TraesCS4B02G326400	1.32451	0.0136009	0.0427027	Up	AT4G35760	LTO1	Thiol-disulfide oxidoreductase LTO1	LOC_Os03g03949	electron carrier/ protein disulfide oxidoreductase
TraesCS2D02G435900	1.31846	2.35798e-06	3.44714e-05	Up	AT2G01620	SKIP28	F-box protein SKIP28	LOC_Os08g33140	F-box domain containing protein
TraesCS5A02G321100	1.31486	5.55359e-08	1.51201e-06	Up	AT5G63140	PAP29	Probable inactive purple acid phosphatase 29	LOC_Os09g36290	Ser/Thr protein phosphatase family protein
TraesCS7B02G228900	1.31256	2.69909e-06	3.85655e-05	Up	AT4G00710	BSK3	BR-signaling kinase 3	LOC_Os04g58750	protein kinase family protein
TraesCSU02G247400	1.31186	2.16231e-06	3.1981e-05	Up	ATMG00960	CCB203	Cytochrome C assembly protein
TraesCS5D02G135700	1.31147	0.00141779	0.00669776	Up	AT5G03890		unknown protein%3B INVOLVED IN: N-terminal protein myristoylation%3B LOCATED IN: cellular_component unknown%3B BEST Arabidopsis thaliana protein match is: unknown protein (TAIR:AT3G10120.1)%3B Has 1807 Blast hits to 1807 proteins in 277 species: Archae - 0%3B /.../ria - 0%3B Metazoa - 736%3B Fungi - 347%3B Plants - 385%3B Viruses - 0%3B Other Eukaryotes - 339 (source: NCBI BLink).	LOC_Os11g05490	expressed protein
TraesCS2D02G267700	1.31131	0.00918505	0.0309652	Up	AT5G01220	SQD2	Sulfoquinovosyl transferase SQD2	LOC_Os07g01030	glycosyl transferase
TraesCS3B02G425900	1.31095	0.00361087	0.0143837	Up	AT3G48500	PDE312	Nucleic acid-binding%2C OB-fold-like protein	LOC_Os01g67570	PDE312/PTAC10
TraesCS2B02G192700	1.31006	3.39453e-05	0.000311857	Up				LOC_Os07g42650	expressed protein
TraesCS6A02G155700	1.30987	0.0112025	0.0364414	Up	AT1G54310		S-adenosyl-L-methionine-dependent methyltransferases superfamily protein	LOC_Os02g07740	RNA binding protein
TraesCS2B02G368500	1.30874	0.000112241	0.000835053	Up	AT1G69850	NPF4.6	Protein NRT1/ PTR FAMILY 4.6	LOC_Os04g41410	expressed protein
TraesCS2B02G330700	1.30795	9.53031e-06	0.000109066	Up	ATCG00270	PSBD	Photosystem II D2 protein	LOC_Os10g41689	photosystem II D2 protein
TraesCS3A02G383800	1.30786	0.000504986	0.00287775	Up	ATCG00120	ATPA	ATP synthase subunit alpha%2C chloroplastic	LOC_Os04g16740	ATP synthase subunit alpha
TraesCS5D02G274500	1.30698	0.0163395	0.0495864	Up	AT3G57990		unknown protein%3B Has 1497 Blast hits to 1323 proteins in 52 species: Archae - 0%3B Bacteria - 4%3B Metazoa - 23%3B Fungi - 34%3B Plants - 61%3B Viruses - 0%3B Other Eukaryotes - 1375 (source: NCBI BLink).	LOC_Os09g31458	expressed protein
TraesCS6B02G383800	1.30636	0.00416979	0.0161861	Up
TraesCS3D02G177700	1.30471	0.00681451	0.0242178	Up	AT5G26749		C2H2 and C2HC zinc fingers superfamily protein	LOC_Os01g14870	zinc finger matrin-type protein 5
TraesCS5D02G017500	1.30324	1.14414e-05	0.000127427	Up
TraesCS4A02G249600	1.30138	0.00365686	0.0145318	Up	AT5G66380	FOLT1	Folate transporter 1%2C chloroplastic	LOC_Os03g52430	mitochondrial carrier protein
TraesCS7A02G097800	1.30104	8.5304e-06	9.96574e-05	Up	AT2G07687	COX3	Cytochrome c oxidase%2C subunit III
TraesCS2A02G142500	1.30074	0.000185818	0.00126214	Up	AT2G15730		P-loop containing nucleoside triphosphate hydrolases superfamily protein	LOC_Os07g44960	nodulation protein-related
TraesCS2D02G569300	1.30056	9.74433e-07	1.65041e-05	Up	AT2G07687	COX3	Cytochrome c oxidase%2C subunit III
TraesCS4A02G255500	1.29874	0.00494082	0.0186044	Up	AT5G65840		Thioredoxin superfamily protein	LOC_Os03g51950	expressed protein
TraesCS1B02G459500	1.29803	0.00132833	0.00635562	Up	AT2G46370	JAR1	Jasmonic acid-amido synthetase JAR1	LOC_Os05g50890	OsGH3.5 - Probable indole-3-acetic acid-amido synthetase
TraesCS1A02G367500	1.29437	0.0017665	0.00802162	Up
TraesCS1D02G167300	1.29278	0.000210521	0.00140209	Up	AT3G47160		RING/U-box superfamily protein	LOC_Os10g35670	zinc finger
TraesCS7A02G328000	1.29249	1.85718e-05	0.000189265	Up	AT5G22360	VAMP714	Vesicle-associated membrane protein 714	LOC_Os10g06540	vesicle-associated membrane protein
TraesCS4A02G154700	1.29242	0.0047409	0.0179989	Up	ATCG00830	rpl2-B	50S ribosomal protein L2%2C chloroplastic
TraesCS5A02G198200	1.29145	0.000633295	0.00346513	Up	AT4G38060		unknown protein%3B BEST Arabidopsis thaliana protein match is: unknown protein (TAIR:AT5G65480.1)%3B Has 35333 Blast hits to 34131 proteins in 2444 species: Archae - 798%3B Bacteria - 22429%3B Metazoa - 974%3B Fungi - 991%3B Plants - 531%3B Viruses - 0%3B Other Euk /.../s - 9610 (source: NCBI BLink).	LOC_Os08g31940	expressed protein
TraesCS7D02G096600	1.29111	0.000329674	0.00202432	Up	AT4G34030	MCCB	Methylcrotonoyl-CoA carboxylase beta chain%2C mitochondrial	LOC_Os08g32850	methylcrotonoyl-CoA carboxylase beta chain
TraesCS4D02G239300	1.28995	0.0025121	0.0106971	Up	AT5G47360		Pentatricopeptide repeat-containing protein At5g47360	LOC_Os03g12430	PPR repeat containing protein
TraesCS1B02G475500	1.28763	0.00203799	0.0090063	Up	ATMG00180	CCB452	cytochrome C biogenesis 452
TraesCS4A02G315200	1.2869	0.00071491	0.00382877	Up	AT5G04250		Cysteine proteinases superfamily protein	LOC_Os03g64219	OTU-like cysteine protease family protein
TraesCS4D02G001400	1.2869	1.18222e-05	0.000131053	Up	AT2G42450		alpha/beta-Hydrolases superfamily protein	LOC_Os09g39790	lipase
TraesCS3D02G411000	1.2867	5.57202e-06	6.96381e-05	Up	ATMG00160	COX2	cytochrome oxidase 2
TraesCS6D02G220200	1.28626	0.00312361	0.0127928	Up	AT5G23850		Arabidopsis thaliana protein of unknown function (DUF821)	LOC_Os02g42920	DTA2
TraesCS3B02G185500	1.2811	0.000130266	0.000943161	Up	ATCG00350	PSAA	Photosystem I P700 chlorophyll a apoprotein A1	LOC_Os01g57964	photosystem I P700 chlorophyll a apoprotein A1
TraesCS3A02G327300	1.28043	0.00574466	0.0210538	Up	AT4G10540		Subtilase family protein	LOC_Os01g58290	OsSub9 - Putative Subtilisin homologue
TraesCS2A02G547200	1.28007	2.05548e-06	3.06642e-05	Up	ATMG01190	ATP1	ATP synthase subunit 1	LOC_Os09g08910	ATP synthase
TraesCS7A02G246100	1.27887	6.78896e-05	0.000550991	Up	AT1G73730	EIL3	ETHYLENE INSENSITIVE 3-like 3 protein	LOC_Os08g39830	ethylene-insensitive 3
TraesCS6D02G160400	1.27876	0.000319212	0.00197184	Up	AT3G30390		Transmembrane amino acid transporter family protein	LOC_Os02g09810	amino acid transporter
TraesCS3B02G356500	1.27808	0.00916845	0.0309181	Up	AT1G60420		Probable nucleoredoxin 1	LOC_Os01g58194	protein disulfide isomerase
TraesCS4A02G336600	1.27791	0.000737882	0.00393136	Up	AT1G61010	CPSF73-I	Cleavage and polyadenylation specificity factor subunit 3-I	LOC_Os03g63590	metallo-beta-lactamase
TraesCS5A02G227700	1.27696	0.00315152	0.0128827	Up	AT5G39785		Protein of unknown function (DUF1666)	LOC_Os09g24700	expressed protein
TraesCS6A02G397100	1.2694	5.00674e-13	7.70078e-11	Up	ATMG00570	ORFX	Sec-independent periplasmic protein translocase	LOC_Os12g33962	uncharacterized tatC-like protein ymf16
TraesCS5A02G165300	1.26858	0.000109774	0.000819914	Up	AT4G27540	PRA1H	PRA1 family protein H	LOC_Os09g04880	expressed protein
TraesCS4B02G053700	1.26849	0.00308166	0.01265	Up	AT4G34480		Glucan endo-1%2C3-beta-glucosidase 7	LOC_Os03g51240	glycosyl hydrolases family 17
TraesCS4D02G064000	1.26798	0.00117493	0.00574942	Up	AT5G66380	FOLT1	Folate transporter 1%2C chloroplastic	LOC_Os03g52430	mitochondrial carrier protein
TraesCS2D02G417300	1.26624	0.00163736	0.0075377	Up	AT1G64810	APO1	APO protein 1%2C chloroplastic	LOC_Os04g52520	APO
TraesCS4B02G226100	1.2661	0.00339377	0.0136753	Up	AT3G59890	DAPB2	4-hydroxy-tetrahydrodipicolinate reductase 2%2C chloroplastic	LOC_Os03g14120	dihydrodipicolinate reductase
TraesCS2B02G060900	1.26556	2.646e-05	0.000253487	Up	AT5G60740	ABCG28	ABC transporter G family member 28	LOC_Os04g11820	white-brown complex homolog protein
TraesCS4A02G222400	1.26518	0.00113356	0.00558271	Up	AT5G46680		Pentatricopeptide repeat-containing protein At5g46680	LOC_Os02g55020	uncharacterized PPR-repeat protein
TraesCS5B02G571100	1.26433	0.016358	0.0496335	Up	AT1G17850	STR8	Rhodanese-like domain-containing protein 8%2C chloroplastic	LOC_Os03g64350	rhodanese-like domain containing protein
TraesCS7B02G274600	1.26411	0.000527064	0.00298079	Up	AT4G28910	AFPH2	AFP homolog 2	LOC_Os05g48500	expressed protein
TraesCS1A02G083800	1.26334	0.0101596	0.0336531	Up	AT1G54870		NAD(P)-binding Rossmann-fold superfamily protein	LOC_Os05g04870	oxidoreductase
TraesCS5D02G059500	1.26316	3.3027e-05	0.000305359	Up	AT4G20380	LSD1	Protein LSD1	LOC_Os12g41700	LSD1 zinc finger domain containing protein
TraesCS6D02G041600	1.26104	8.37636e-05	0.000655024	Up	AT1G55510	BCDH BETA1	2-oxoisovalerate dehydrogenase subunit beta 1%2C mitochondrial	LOC_Os07g07470	transketolase
TraesCS3B02G186100	1.25989	0.00872116	0.0296514	Up	ATCG00490	RBCL	Ribulose bisphosphate carboxylase large chain	LOC_Os10g21268	ribulose bisphosphate carboxylase large chain precursor
TraesCS1D02G075900	1.25712	0.00543938	0.0201304	Up	AT4G01995		unknown protein%3B BEST Arabidopsis thaliana protein match is: unknown protein (TAIR:AT1G64680.1)%3B Has 30201 Blast hits to 17322 proteins in 780 species: Archae - 12%3B Bacteria - 1396%3B Metazoa - 17338%3B Fungi - 3422%3B Plants - 5037%3B Viruses - 0%3B Other Eu /.../es - 2996 (source: NCBI BLink).	LOC_Os05g04070	expressed protein
TraesCS4A02G136900	1.25682	0.0129819	0.0411353	Up	AT1G28510		Optic atrophy 3 protein (OPA3)	LOC_Os01g54950	expressed protein
TraesCS3A02G084800	1.25605	0.000619895	0.00340419	Up	AT2G45510	CYP704A2	cytochrome P450%2C family 704%2C subfamily A%2C polypeptide 2	LOC_Os04g48460	cytochrome P450
TraesCS7A02G102600	1.25564	1.80585e-06	2.76141e-05	Up	AT4G34030	MCCB	Methylcrotonoyl-CoA carboxylase beta chain%2C mitochondrial	LOC_Os08g32850	methylcrotonoyl-CoA carboxylase beta chain
TraesCS2B02G080400	1.25499	0.00029012	0.00182303	Up	AT3G47570		Probable LRR receptor-like serine/threonine-protein kinase At3g47570	LOC_Os04g15630	xa21
TraesCS1B02G262900	1.25388	1.68418e-07	3.86087e-06	Up	ATMG00510	NAD7	NADH dehydrogenase subunit 7	LOC_Os12g33958	NADH-ubiquinone oxidoreductase 49 kDa subunit
TraesCS3D02G179200	1.25327	0.00109284	0.00541537	Up	AT1G02660		alpha/beta-Hydrolases superfamily protein	LOC_Os01g15000	lipase
TraesCS6A02G217400	1.25308	8.91788e-06	0.000103293	Up	AT5G17440		LUC7 related protein	LOC_Os02g39300	RNA-binding protein Luc7-like
TraesCS1B02G218600	1.25285	0.000414323	0.00244628	Up				LOC_Os10g05240	OsFBX369 - F-box domain containing protein
TraesCS3D02G235000	1.25122	0.000189122	0.00128093	Up	AT1G73150	GTE3	Transcription factor GTE3%2C chloroplastic	LOC_Os01g46040	bromodomain domain containing protein
TraesCS5A02G297100	1.24863	0.0101214	0.0335511	Up	AT1G48140		dolichol-phosphate mannosyltransferase-related	LOC_Os02g51420	expressed protein
TraesCS3A02G329400	1.24834	0.00633482	0.0228178	Up	AT1G19100		Histidine kinase-%2C DNA gyrase B-%2C and HSP90-like ATPase family protein	LOC_Os11g26830	ATP-binding region
TraesCS6A02G083200	1.24433	5.16677e-06	6.55557e-05	Up	AT5G47120	BI-1	Bax inhibitor 1	LOC_Os02g03280	transmembrane BAX inhibitor motif-containing protein
TraesCS7A02G222800	1.24298	0.00100818	0.00507254	Up	AT5G55220	TIG	Trigger factor-like protein TIG%2C Chloroplastic	LOC_Os06g20320	peptidyl-prolyl cis-trans isomerase
TraesCS4D02G054100	1.24108	0.0046232	0.0176298	Up	AT5G66780		unknown protein%3B Has 1807 Blast hits to 1807 proteins in 277 species: Archae - 0%3B Bacteria - 0%3B Metazoa - 736%3B Fungi - 347%3B Plants - 385%3B Viruses - 0%3B Other Eukaryotes - 339 (source: NCBI BLink).	LOC_Os03g51350	expressed protein
TraesCS3B02G119500	1.24075	0.00446775	0.0171377	Up	AT2G37710	LECRK41	L-type lectin-domain containing receptor kinase IV.1	LOC_Os02g42780	lectin receptor-type protein kinase
TraesCS2A02G362000	1.24024	6.04553e-05	0.000501059	Up	AT2G07696	RPS7	Ribosomal protein S7%2C mitochondrial	LOC_Os12g34045	mitochondrial ribosomal protein S7
TraesCS3B02G356000	1.23893	0.000153528	0.00108102	Up	AT4G27020		unknown protein%3B FUNCTIONS IN: molecular_function unknown%3B LOCATED IN: vacuole%3B BEST Arabidopsis thaliana protein match is: unknown protein (TAIR:AT5G54870.1)%3B Has 1807 Blast hits to 1807 proteins in 277 species: Archae - 0%3B Bacteria - 0%3B Metazoa - /.../ungi - 347%3B Plants - 385%3B Viruses - 0%3B Other Eukaryotes - 339 (source: NCBI BLink).	LOC_Os01g58114	expressed protein
TraesCS3B02G411200	1.23852	0.00395037	0.0154713	Up				LOC_Os01g64720	expressed protein
TraesCS4B02G185400	1.23627	0.000966869	0.00490034	Up	AT3G16910	AAE7	Acetate/butyrate--CoA ligase AAE7%2C peroxisomal	LOC_Os03g19240	AMP-binding enzyme
TraesCS1A02G298900	1.2341	1.15804e-06	1.90585e-05	Up	AT2G38410		ENTH/VHS/GAT family protein	LOC_Os05g39760	VHS and GAT domain containing protein
TraesCS7B02G457000	1.2337	4.52904e-05	0.000394764	Up	ATMG00516	NAD1C	NADH dehydrogenase 1C	LOC_Os01g33960	transposon protein
TraesCS7D02G451300	1.2322	0.0110372	0.036005	Up	AT1G16670		Protein kinase superfamily protein	LOC_Os06g46330	Protein kinase domain containing protein
TraesCS4D02G285100	1.23203	0.000418951	0.00246991	Up	AT3G47500	CDF3	Cyclic dof factor 3	LOC_Os03g07360	expressed protein
TraesCS3A02G275600	1.23164	0.000530202	0.00299493	Up	AT2G19900	NADP-ME1	NADP-dependent malic enzyme 1	LOC_Os01g52500	NADP-dependent malic enzyme
TraesCS3B02G474400	1.23145	0.00345642	0.0138812	Up	AT1G21230	WAK5	Wall-associated receptor kinase 5	LOC_Os04g24220	OsWAK32 - OsWAK receptor-like protein kinase
TraesCS5A02G415800	1.23095	0.00100836	0.00507315	Up	ATMG00090		structural constituent of ribosome%3Bprotein binding	LOC_Os12g34054	mitochondrial ribosomal protein S3
TraesCS7B02G487000	1.22963	1.14195e-07	2.79141e-06	Up	AT2G07741	ATP6-1	ATPase%2C F0 complex%2C subunit A protein	LOC_Os12g23610	ATP synthase
TraesCS5A02G488100	1.22916	0.016108	0.0490115	Up	AT5G04110	GYRB3	DNA GYRASE B3	LOC_Os01g63354	ELM2 domain containing protein
TraesCS1B02G209600	1.22859	8.88181e-06	0.000102939	Up	AT1G65020		FUNCTIONS IN: molecular_function unknown%3B INVOLVED IN: biological_process unknown%3B LOCATED IN: endoplasmic reticulum%2C plasma membrane%3B EXPRESSED IN: 23 plant structures%3B EXPRESSED DURING: 13 growth stages%3B CONTAINS InterPro DOMAIN/s: NERD (InterPro: /.../528)%3B Has 69 Blast hits to 69 proteins in 27 species: Archae - 0%3B Bacteria - 18%3B Metazoa - 8%3B Fungi - 0%3B Plants - 36%3B Vi…	LOC_Os10g42630	expressed protein
TraesCS2A02G049700	1.22759	0.00209787	0.00922216	Up	AT5G60740	ABCG28	ABC transporter G family member 28	LOC_Os04g11820	white-brown complex homolog protein
TraesCS6A02G397200	1.22735	1.47046e-06	2.32471e-05	Up	AT2G07599		unknown protein%3B BEST Arabidopsis thaliana protein match is: unknown protein (TAIR:ATMG01040.1).
TraesCS1B02G188800	1.22579	1.51888e-05	0.000160539	Up	ATMG00180	CCB452	cytochrome C biogenesis 452
TraesCS4D02G363000	1.22534	0.00261331	0.0110472	Up	AT1G17010		2-oxoglutarate (2OG) and Fe(II)-dependent oxygenase superfamily protein	LOC_Os01g24980	naringenin
TraesCS1A02G140400	1.22396	0.0034743	0.0139404	Up	AT2G07675		Ribosomal protein S12/S23 family protein	LOC_Os12g34062	mitochondrial ribosomal protein S12
TraesCS7B02G487300	1.22386	5.98807e-07	1.10572e-05	Up	AT2G07696	RPS7	Ribosomal protein S7%2C mitochondrial	LOC_Os12g34045	mitochondrial ribosomal protein S7
TraesCS1D02G292400	1.22283	6.78002e-06	8.21458e-05	Up	AT2G38410		ENTH/VHS/GAT family protein	LOC_Os05g39760	VHS and GAT domain containing protein
TraesCS3A02G508600	1.22268	0.00825597	0.0283557	Up	AT4G24220	VEP1	3-oxo-Delta(4%2C5)-steroid 5-beta-reductase	LOC_Os03g32170	NAD dependent epimerase/dehydratase family protein
TraesCS7D02G264000	1.22085	9.06638e-13	1.28018e-10	Up	AT5G41110		unknown protein%3B INVOLVED IN: biological_process unknown%3B LOCATED IN: chloroplast%3B BEST Arabidopsis thaliana protein match is: unknown protein (TAIR:AT3G26890.5)%3B Has 1807 Blast hits to 1807 proteins in 277 species: Archae - 0%3B Bacteria - 0%3B Metazoa /.../%3B Fungi - 347%3B Plants - 385%3B Viruses - 0%3B Other Eukaryotes - 339 (source: NCBI BLink).	LOC_Os08g42420	expressed protein
TraesCS5B02G284000	1.22035	0.00385465	0.0151635	Up	AT1G69040	ACR4	ACT domain-containing protein ACR4	LOC_Os03g40100	ACT domain containing protein
TraesCS3A02G260600	1.21871	7.85963e-05	0.000621697	Up	AT1G15060		Uncharacterised conserved protein UCP031088%2C alpha/beta hydrolase	LOC_Os01g49760	expressed protein
TraesCS2D02G283600	1.21841	0.0104105	0.0343367	Up	AT3G27020	YSL6	Probable metal-nicotianamine transporter YSL6	LOC_Os04g32060	transposon protein
TraesCS2A02G204500	1.21772	0.00135636	0.0064662	Up	AT5G03720	HSFA3	Heat stress transcription factor A-3	LOC_Os02g32590	HSF-type DNA-binding domain containing protein
TraesCS2A02G559200	1.21755	0.000316312	0.00195755	Up	AT1G34260	FAB1D	Putative 1-phosphatidylinositol-3-phosphate 5-kinase FAB1D	LOC_Os08g01390	phosphatidylinositol-4-phosphate 5-Kinase
TraesCS5A02G195400	1.21656	0.0063745	0.0229294	Up	AT4G16340	SPK1	Guanine nucleotide exchange factor SPIKE 1	LOC_Os03g21080	guanine nucleotide exchange factor
TraesCS4D02G209700	1.21633	0.00271462	0.0113902	Up	AT3G53800	Fes1B	Fes1B	LOC_Os03g16460	expressed protein
TraesCS1D02G372300	1.21401	0.00146928	0.00689286	Up	AT4G14368		Regulator of chromosome condensation (RCC1) family protein	LOC_Os01g50470	regulator of chromosome condensation
TraesCS7A02G518800	1.21389	9.23265e-06	0.000106276	Up	AT1G10170	NFXL1	NF-X1-type zinc finger protein NFXL1	LOC_Os06g14190	NF-X1-type zinc finger protein
TraesCS6D02G408000	1.21329	0.00763795	0.0265793	Up	AT1G63610		unknown protein%3B FUNCTIONS IN: molecular_function unknown%3B INVOLVED IN: biological_process unknown%3B LOCATED IN: chloroplast%3B EXPRESSED IN: 22 plant structures%3B EXPRESSED DURING: 13 growth stages%3B BEST Arabidopsis thaliana protein match is: unknown p /.../ (TAIR:AT2G14910.1)%3B Has 537 Blast hits to 411 proteins in 100 species: Archae - 0%3B Bacteria - 231%3B Metazoa - 0%3B Fungi - 0%3…	LOC_Os02g58650	expressed protein
TraesCS3B02G126000	1.21281	0.000268099	0.00170914	Up	ATCG00890	NDHB.1	NADH-Ubiquinone/plastoquinone (complex I) protein	LOC_Os07g25004	NADPH-dependent oxidoreductase
TraesCS6A02G363900	1.21268	2.23394e-05	0.000220476	Up	AT2G25620	AtDBP1	Probable protein phosphatase 2C 22	LOC_Os02g55560	protein phosphatase 2C
TraesCS7B02G051500	1.21161	9.12892e-06	0.000105338	Up	ATMG00270	NAD6	NADH dehydrogenase 6	LOC_Os12g34014	NADH-ubiquinone oxidoreductase chain 6
TraesCS3D02G319300	1.21044	0.00140073	0.00663533	Up	AT1G69290		Pentatricopeptide repeat-containing protein At1g69290	LOC_Os01g57900	PPR repeat domain containing protein
TraesCS5A02G371500	1.208	2.96902e-05	0.000279736	Up	AT2G26580	YAB5	Axial regulator YABBY 5	LOC_Os03g44710	YABBY domain containing protein
TraesCS4B02G080400	1.20752	0.00106228	0.00529303	Up	AT1G64960		ARM repeat superfamily protein	LOC_Os03g42040	HEAT repeat family protein
TraesCS1D02G123700	1.20575	0.00611933	0.0221629	Up	AT2G19860	HXK2	Hexokinase-2	LOC_Os05g09500	hexokinase
TraesCS2B02G271700	1.20558	0.000113209	0.000841262	Up	AT2G26980	CIPK3	CBL-interacting serine/threonine-protein kinase 3	LOC_Os12g03810	CAMK_KIN1/SNF1/Nim1_like.37 - CAMK includes calcium/calmodulin depedent protein kinases
TraesCS5B02G266500	1.20399	0.0083578	0.0286452	Up	AT2G17350		unknown protein%3B Has 119 Blast hits to 93 proteins in 40 species: Archae - 0%3B Bacteria - 3%3B Metazoa - 18%3B Fungi - 12%3B Plants - 44%3B Viruses - 0%3B Other Eukaryotes - 42 (source: NCBI BLink).	LOC_Os09g31466	expressed protein
TraesCS3D02G314400	1.20347	0.00758227	0.0264211	Up	AT3G14460		Putative disease resistance protein At3g14460	LOC_Os01g57280	rp1
TraesCS2D02G289500	1.20305	1.0276e-07	2.55273e-06	Up	AT5G47860		Protein of unknown function (DUF1350)	LOC_Os04g33280	expressed protein
TraesCS5B02G176700	1.20216	0.0074241	0.0259693	Up	AT2G18160	ATBZIP2	basic leucine-zipper 2	LOC_Os09g13570	CPuORF2 - conserved peptide uORF-containing transcript
TraesCS7A02G125800	1.20172	0.00672443	0.0239562	Up	AT3G14470	RPPL1	Putative disease resistance RPP13-like protein 1	LOC_Os08g43050	disease resistance protein RGA2
TraesCS2A02G487900	1.20103	0.00415902	0.0161496	Up	AT2G42130	PAP13	Probable plastid-lipid-associated protein 13%2C chloroplastic	LOC_Os04g57020	expressed protein
TraesCS7B02G016500	1.20037	0.0012792	0.00616321	Up	AT3G59140	ABCC10	ABC transporter C family member 10	LOC_Os06g06440	ABC transporter
TraesCS6A02G321900	1.19929	5.25747e-05	0.000447471	Up	AT5G49470		PAS domain-containing protein tyrosine kinase family protein	LOC_Os12g37570	protein kinase family protein
TraesCS4A02G180000	1.19833	9.27236e-07	1.58606e-05	Up	AT2G44970		alpha/beta-Hydrolases superfamily protein	LOC_Os11g01875	lipase-related
TraesCS1D02G282200	1.19502	0.000614818	0.00338173	Up	AT5G02130	NDP1	Tetratricopeptide repeat (TPR)-like superfamily protein	LOC_Os05g38330	NDP1
TraesCS4B02G209900	1.19489	0.000737734	0.00393079	Up	AT5G06060		Tropinone reductase homolog At5g06060	LOC_Os03g16230	oxidoreductase
TraesCS1B02G187600	1.19474	1.92e-05	0.000194475	Up	AT3G47160		RING/U-box superfamily protein	LOC_Os10g35670	zinc finger
TraesCS7B02G457100	1.19276	0.00114888	0.00564584	Up	AT2G07741	ATP6-1	ATPase%2C F0 complex%2C subunit A protein	LOC_Os12g23610	ATP synthase
TraesCS4B02G134600	1.19261	0.00137317	0.00652995	Up	AT5G22620		Probable 2-carboxy-D-arabinitol-1-phosphatase	LOC_Os11g05260	phosphoglycerate mutase
TraesCS5B02G542300	1.19226	0.00141532	0.00668872	Up	AT5G48840	PANC	Pantoate--beta-alanine ligase	LOC_Os03g63490	pantoate--beta-alanine ligase
TraesCS1A02G157200	1.19224	0.00106301	0.00529636	Up	ATCG00890	NDHB.1	NADH-Ubiquinone/plastoquinone (complex I) protein	LOC_Os07g25004	NADPH-dependent oxidoreductase
TraesCS2D02G062500	1.19141	0.0122477	0.0392033	Up	AT4G24175		unknown protein%3B CONTAINS InterPro DOMAIN/s: Uncharacterised protein family UPF0307 (InterPro:IPR006839)%3B Has 30201 Blast hits to 17322 proteins in 780 species: Archae - 12%3B Bacteria - 1396%3B Metazoa - 17338%3B Fungi - 3422%3B Plants - 5037%3B Viruses - 0%3B /.../ Eukaryotes - 2996 (source: NCBI BLink).	LOC_Os04g24410	kinesin heavy chain isolog
TraesCS1B02G412900	1.19051	0.000568532	0.00317307	Up	ATCG00120	ATPA	ATP synthase subunit alpha%2C chloroplastic	LOC_Os04g16740	ATP synthase subunit alpha
TraesCS1B02G308600	1.19027	0.000117314	0.000866666	Up	AT2G38410		ENTH/VHS/GAT family protein	LOC_Os05g39760	VHS and GAT domain containing protein
TraesCS4B02G174100	1.18979	7.24969e-05	0.000581243	Up	AT1G08570	ACHT4	Thioredoxin-like 1-1%2C chloroplastic	LOC_Os03g21000	thioredoxin
TraesCS6D02G132400	1.18972	0.00643924	0.0231209	Up	AT4G19830	FKBP17-1	Peptidyl-prolyl cis-trans isomerase FKBP17-1%2C chloroplastic	LOC_Os02g07220	peptidyl-prolyl cis-trans isomerase
TraesCS2A02G144400	1.18899	3.95881e-05	0.000353377	Up	AT3G14590	NTMC2T6.2	Calcium-dependent lipid-binding (CaLB domain) family protein	LOC_Os02g20970	C2 domain containing protein
TraesCS7A02G236400	1.18861	0.0126234	0.0401968	Up	AT1G55760		BTB/POZ domain-containing protein At1g55760	LOC_Os08g38700	C3-BTB2 - Bric-a-Brac
TraesCS4A02G225500	1.18826	1.83714e-09	8.4578e-08	Up	AT1G33420		PHD finger protein At1g33420	LOC_Os11g12650	PHD-finger domain containing protein
TraesCS5A02G435600	1.18822	0.000236941	0.00154481	Up	AT2G32040		Folate-biopterin transporter 1%2C chloroplastic	LOC_Os03g58080	BT1 family protein
TraesCS5A02G068100	1.18709	0.00997506	0.0331566	Up	AT2G29930		F-box/LRR-repeat protein At2g29930	LOC_Os12g31340	OsFBD15 - F-box and FBD domain containing protein
TraesCS4B02G121300	1.18536	0.00647377	0.0232309	Up	AT3G52850	VSR1	Vacuolar-sorting receptor 1	LOC_Os11g02464	vacuolar-sorting receptor precursor
TraesCS6A02G350500	1.18493	0.00582934	0.0213091	Up
TraesCS7B02G251000	1.18471	0.00582223	0.0212867	Up				LOC_Os11g42930	expressed protein
TraesCS4B02G235000	1.18357	0.000450591	0.00262105	Up	AT1G32230	RCD1	Inactive poly	LOC_Os03g12820	ATP8
TraesCS2A02G184400	1.18303	5.64423e-06	7.0392e-05	Up	AT1G20110		RING/FYVE/PHD zinc finger superfamily protein	LOC_Os07g38580	zinc finger family protein
TraesCS3B02G211600	1.18216	0.00235529	0.0101401	Up	AT5G04910		unknown protein%3B Has 71 Blast hits to 71 proteins in 36 species: Archae - 0%3B Bacteria - 0%3B Metazoa - 17%3B Fungi - 0%3B Plants - 40%3B Viruses - 0%3B Other Eukaryotes - 14 (source: NCBI BLink).	LOC_Os01g16080	expressed protein
TraesCS3D02G279800	1.18216	0.00179485	0.00812883	Up	AT3G16520	UGT88A1	UDP-glycosyltransferase 88A1	LOC_Os01g53330	anthocyanidin 5
TraesCS5A02G430400	1.18086	0.00195328	0.00870651	Up	AT2G07707	YMF19	ATP synthase protein YMF19	LOC_Os12g34018	ATP synthase protein YMF19
TraesCS6B02G393900	1.17854	0.014314	0.0445443	Up	AT2G05320		beta-1%2C2-N-acetylglucosaminyltransferase II	LOC_Os02g55470	alpha-1
TraesCS2A02G402800	1.17707	0.00309333	0.0126891	Up	AT5G50840		CONTAINS InterPro DOMAIN/s: Taxilin (InterPro:IPR019132)%3B Has 30201 Blast hits to 17322 proteins in 780 species: Archae - 12%3B Bacteria - 1396%3B Metazoa - 17338%3B Fungi - 3422%3B Plants - 5037%3B Viruses - 0%3B Other Eukaryotes - 2996 (source: NCBI BLink).	LOC_Os03g17930	alpha-taxilin
TraesCS5B02G573300	1.17663	1.98422e-07	4.41967e-06	Up	AT2G07741	ATP6-1	ATPase%2C F0 complex%2C subunit A protein	LOC_Os12g23610	ATP synthase
TraesCS3B02G453100	1.17598	0.00303402	0.0124826	Up	AT1G28560	SRD2	snRNA-activating protein complex subunit	LOC_Os01g68440	expressed protein
TraesCS2A02G303800	1.17369	0.00825968	0.0283664	Up	AT1G05970		RNA-binding (RRM/RBD/RNP motifs) family protein	LOC_Os07g15270	RNA-binding region RNP-1
TraesCS3D02G197300	1.17353	0.00283759	0.0118114	Up	ATMG00180	CCB452	cytochrome C biogenesis 452
TraesCS1A02G428600	1.17342	0.00692035	0.0245243	Up	AT5G07610		F-box protein At5g07610	LOC_Os07g35060	OsFBX238 - F-box domain containing protein
TraesCSU02G097400	1.16976	0.0113642	0.036865	Up	ATMG00160	COX2	cytochrome oxidase 2
TraesCS7D02G548300	1.16951	0.00353736	0.0141438	Up	AT1G48380	RHL1	DNA-binding protein RHL1	LOC_Os07g07580	ROOT HAIRLESS 1
TraesCS2B02G184500	1.16863	0.0160125	0.048771	Up	AT2G02820	MYB88	myb domain protein 88	LOC_Os07g43420	MYB family transcription factor
TraesCS5D02G392300	1.16809	1.13729e-05	0.000126798	Up	AT4G14680	APS3	ATP-sulfurylase 3%2C chloroplastic	LOC_Os03g53230	bifunctional 3-phosphoadenosine 5-phosphosulfate synthetase
TraesCSU02G115700	1.16779	0.000443134	0.00258546	Up	AT2G22610		Di-glucose binding protein with Kinesin motor domain	LOC_Os03g02290	kinesin motor domain containing protein
TraesCS3A02G466700	1.16755	0.00349825	0.0140181	Up	AT3G24030	THIM	Hydroxyethylthiazole kinase
TraesCS6B02G131700	1.16688	8.17638e-05	0.000642035	Up	AT2G07741	ATP6-1	ATPase%2C F0 complex%2C subunit A protein	LOC_Os12g23610	ATP synthase
TraesCS1B02G478400	1.16671	2.84928e-05	0.00027034	Up	AT4G23920	UGE2	UDP-glucose 4-epimerase 2	LOC_Os05g51670	NAD dependent epimerase/dehydratase family protein
TraesCS1D02G196100	1.1667	2.12035e-05	0.000211112	Up	ATMG01190	ATP1	ATP synthase subunit 1	LOC_Os09g08910	ATP synthase
TraesCS7A02G382000	1.16667	0.00278349	0.0116236	Up	AT4G26470	CML21	Probable calcium-binding protein CML21	LOC_Os06g40720	EF hand family protein
TraesCS6A02G330200	1.16471	0.00908496	0.0306758	Up	AT1G09580		Transmembrane emp24 domain-containing protein p24delta3	LOC_Os02g52920	emp24/gp25L/p24 family protein
TraesCS6D02G302300	1.15939	0.00170734	0.00779998	Up	AT1G76690	OPR2	12-oxophytodienoate reductase 2	LOC_Os06g11240	12-oxophytodienoate reductase
TraesCS1D02G208800	1.15865	0.00193653	0.00865055	Up	AT3G10405		unknown protein%3B FUNCTIONS IN: molecular_function unknown%3B INVOLVED IN: pollen development%3B LOCATED IN: chloroplast%3B Has 44 Blast hits to 44 proteins in 20 species: Archae - 0%3B Bacteria - 4%3B Metazoa - 0%3B Fungi - 0%3B Plants - 39%3B Viruses - 0%3B Other Eu /.../es - 1 (source: NCBI BLink).	LOC_Os10g39800	expressed protein
TraesCS2B02G283000	1.15856	0.00981424	0.0327047	Up	ATMG01190	ATP1	ATP synthase subunit 1	LOC_Os09g08910	ATP synthase
TraesCS7A02G097900	1.15832	0.00747231	0.0261071	Up	ATMG00660	ORF149	Uncharacterized mitochondrial protein AtMg00660
TraesCS3A02G325600	1.15731	0.0040344	0.0157496	Up	AT4G26090	RPS2	Disease resistance protein RPS2	LOC_Os01g57870	disease resistance protein RPS2
TraesCS5B02G169000	1.15659	8.25534e-06	9.68893e-05	Up	AT4G26500	SUFE1	SufE-like protein 1%2C chloroplastic/mitochondrial	LOC_Os09g09790	Fe-S metabolism associated domain containing protein
TraesCS1B02G236200	1.15625	0.000115225	0.000853902	Up	AT2G30100		Pentatricopeptide repeat-containing protein At2g30100%2C chloroplastic	LOC_Os05g28500	ubiquitin family protein
TraesCS4A02G163900	1.15506	0.000187776	0.00127379	Up
TraesCS4B02G038100	1.15495	5.17263e-05	0.000441519	Up	AT5G03280	EIN2	Ethylene-insensitive protein 2	LOC_Os03g49400	ethylene-insensitive protein
TraesCS4A02G187600	1.15353	8.29815e-05	0.000649981	Up	AT5G13750	ZIFL1	Protein ZINC INDUCED FACILITATOR-LIKE 1	LOC_Os11g04104	major facilitator superfamily antiporter
TraesCS6B02G383500	1.15254	0.0060686	0.022028	Up				LOC_Os11g26790	dehydrin
TraesCS7D02G336100	1.15232	0.00410977	0.0159892	Up	AT5G60750		CAAX amino terminal protease family protein	LOC_Os06g30910	CAAX amino terminal protease family protein
TraesCS3A02G084300	1.15173	5.67138e-05	0.000476366	Up	AT4G24880		unknown protein%3B Has 30201 Blast hits to 17322 proteins in 780 species: Archae - 12%3B Bacteria - 1396%3B Metazoa - 17338%3B Fungi - 3422%3B Plants - 5037%3B Viruses - 0%3B Other Eukaryotes - 2996 (source: NCBI BLink).	LOC_Os01g01130	snurportin-1
TraesCS6A02G234100	1.15077	0.000263734	0.00168574	Up	AT5G23340		RNI-like superfamily protein	LOC_Os02g42412	F-box/LRR-repeat protein 2
TraesCS5A02G502900	1.15071	2.0285e-06	3.03333e-05	Up	AT2G07727	MT-CYB	Di-haem cytochrome%2C transmembrane%3BCytochrome b/b6%2C C-terminal	LOC_Os01g57942	cytochrome b6
TraesCS4A02G260300	1.15067	0.00514947	0.0192409	Up	AT3G47530	PCMP-H76	Pentatricopeptide repeat-containing protein At3g47530	LOC_Os08g33700	pentatricopeptide
TraesCS2D02G284000	1.15028	0.000147206	0.00104364	Up	AT5G50600	HSD1	11-beta-hydroxysteroid dehydrogenase 1A	LOC_Os04g32080	11-beta-hydroxysteroid dehydrogenase
TraesCS1B02G436500	1.14944	0.00120761	0.00587773	Up	AT4G22220	ISU1	Iron-sulfur cluster assembly protein 1	LOC_Os05g49300	iron-sulfur cluster assembly enzyme ISCU
TraesCS4A02G069600	1.14925	2.77488e-06	3.94114e-05	Up
TraesCS4A02G216400	1.14909	0.00101425	0.00509502	Up
TraesCS1D02G308200	1.14696	0.000698817	0.00375512	Up	AT5G21170	KINB1	SNF1-related protein kinase regulatory subunit beta-1	LOC_Os05g41220	SNF1-related protein kinase regulatory subunit beta-1
TraesCS3D02G405200	1.1467	0.00669334	0.0238741	Up	AT2G17730	NIP2	NEP1-interacting protein 2	LOC_Os07g29600	zinc finger
TraesCS3D02G260800	1.14665	1.35806e-05	0.000146751	Up	AT1G15060		Uncharacterised conserved protein UCP031088%2C alpha/beta hydrolase	LOC_Os01g49760	expressed protein
TraesCS1B02G090400	1.14547	0.000638719	0.00348977	Up	AT2G46800	MTP1	Metal tolerance protein 1	LOC_Os05g03780	cation efflux family protein
TraesCS2B02G486100	1.14485	3.25298e-06	4.49085e-05	Up	AT3G14460		Putative disease resistance protein At3g14460	LOC_Os02g02660	retrotransposon protein
TraesCS1B02G208500	1.14234	0.000273413	0.00173578	Up	AT2G35490	PAP3	Probable plastid-lipid-associated protein 3%2C chloroplastic	LOC_Os10g42500	PAP fibrillin family domain containing protein
TraesCSU02G158700	1.14143	0.000224047	0.00147588	Up	ATMG01360	COX1	Cytochrome c oxidase subunit 1	LOC_Os12g33946	cytochrome c oxidase subunit 1
TraesCS3D02G410700	1.14127	0.000573068	0.00319294	Up	ATMG00510	NAD7	NADH dehydrogenase subunit 7	LOC_Os12g33958	NADH-ubiquinone oxidoreductase 49 kDa subunit
TraesCS7D02G303200	1.14062	0.00150884	0.00704846	Up	AT3G13682	LDL2	Lysine-specific histone demethylase 1 homolog 2	LOC_Os08g04780	amine oxidase
TraesCS3D02G144000	1.14021	0.0102254	0.0338369	Up	AT1G17665		unknown protein%3B FUNCTIONS IN: molecular_function unknown%3B INVOLVED IN: biological_process unknown%3B LOCATED IN: endomembrane system%3B EXPRESSED IN: 15 plant structures%3B EXPRESSED DURING: 11 growth stages%3B Has 149 Blast hits to 146 proteins in 39 spec /.../rchae - 0%3B Bacteria - 4%3B Metazoa - 21%3B Fungi - 5%3B Plants - 30%3B Viruses - 0%3B Other Eukaryotes - 89 (source: NCBI BLink).	LOC_Os01g10080	expressed protein
TraesCS4B02G065100	1.14014	0.000283092	0.00178646	Up	AT5G66380	FOLT1	Folate transporter 1%2C chloroplastic	LOC_Os03g52430	mitochondrial carrier protein
TraesCS7D02G233900	1.13848	1.18789e-05	0.000131558	Up	AT1G10710	PHS1	poor homologous synapsis 1	LOC_Os06g27860	poor homologous synapsis 1 protein
TraesCS2B02G112400	1.1381	0.00015564	0.00109226	Up	AT1G09270	IMPA4	Importin subunit alpha-4	LOC_Os07g48880	importin subunit alpha-1b
TraesCS1A02G158900	1.13793	3.17277e-07	6.54775e-06	Up	AT5G66810		CONTAINS InterPro DOMAIN/s: CTLH%2C C-terminal LisH motif (InterPro:IPR006595)%3B BEST Arabidopsis thaliana protein match is: LisH and RanBPM domains containing protein (TAIR:AT1G61150.1)%3B Has 333 Blast hits to 242 proteins in 88 species: Archae - 0%3B Ba /.../ - 0%3B Metazoa - 104%3B Fungi - 47%3B Plants - 152%3B Viruses - 0%3B Other Eukaryotes - 30 (source: NCBI BLink).	LOC_Os10g24070	expressed protein
TraesCS5D02G022900	1.13741	0.00436339	0.0168068	Up				LOC_Os09g01140	expressed protein
TraesCS3B02G343200	1.13693	0.00018671	0.00126738	Up	AT5G19840		2-oxoglutarate (2OG) and Fe(II)-dependent oxygenase superfamily protein	LOC_Os01g56640	transcription factor jumonji
TraesCS6D02G261800	1.13599	0.00565462	0.0207769	Up	ATMG01360	COX1	Cytochrome c oxidase subunit 1	LOC_Os12g33946	cytochrome c oxidase subunit 1
TraesCS7A02G097700	1.13422	7.40309e-06	8.84618e-05	Up	AT2G07741	ATP6-1	ATPase%2C F0 complex%2C subunit A protein	LOC_Os12g23610	ATP synthase
TraesCS6A02G254200	1.13385	0.00276245	0.011555	Up				LOC_Os02g45000	expressed protein
TraesCS6D02G067200	1.13371	0.00379361	0.0149694	Up	AT3G47580		Leucine-rich repeat protein kinase family protein	LOC_Os02g40200	receptor-like protein kinase precursor
TraesCS1D02G306300	1.13297	0.0086488	0.0294423	Up	AT1G51370		F-box/FBD/LRR-repeat protein At1g51370	LOC_Os07g18560	OsFBLD6 - F-box
TraesCS6B02G464500	1.13294	4.66634e-06	6.01929e-05	Up	AT3G46730	RPP13L3	Putative disease resistance RPP13-like protein 3	LOC_Os08g28540	resistance protein LR10
TraesCS3B02G283700	1.13294	0.00673003	0.0239725	Up	AT1G55265		Protein of unknown function%2C DUF538	LOC_Os03g48626	expressed protein
TraesCS4A02G001600	1.13191	0.00508459	0.0190406	Up	AT2G42450		alpha/beta-Hydrolases superfamily protein	LOC_Os09g39790	lipase
TraesCS2B02G229800	1.13152	0.00724733	0.0254486	Up	AT1G61215	BRD4	bromodomain 4	LOC_Os07g37800	bromodomain domain containing protein
TraesCS5D02G119600	1.12799	0.00728585	0.0255612	Up
TraesCS1B02G413200	1.1253	1.01754e-05	0.000115266	Up	AT2G07687	COX3	Cytochrome c oxidase%2C subunit III
TraesCS4A02G346100	1.12451	0.00816279	0.0280835	Up	AT3G11080	AtRLP35	receptor like protein 35	LOC_Os07g01710	phytosulfokine receptor precursor
TraesCS6D02G193500	1.12197	0.000204937	0.00137096	Up	AT1G13120	GLE1	Protein GLE1	LOC_Os02g38250	EMB1745
TraesCS4B02G141400	1.1219	0.0025494	0.0108263	Up	AT2G37650	SCL9	Scarecrow-like protein 9	LOC_Os11g47900	SCARECROW
TraesCS6A02G196700	1.12092	0.000246522	0.00159608	Up
TraesCSU02G268400	1.12092	1.09855e-05	0.000122899	Up	ATMG01360	COX1	Cytochrome c oxidase subunit 1	LOC_Os12g33946	cytochrome c oxidase subunit 1
TraesCS3A02G142300	1.11902	0.000296843	0.00185789	Up	AT2G07707	YMF19	ATP synthase protein YMF19	LOC_Os12g34018	ATP synthase protein YMF19
TraesCSU02G245500	1.11662	0.0109853	0.035864	Up	AT2G07707	YMF19	ATP synthase protein YMF19	LOC_Os12g34018	ATP synthase protein YMF19
TraesCS4D02G125800	1.11598	5.94915e-05	0.000495088	Up	AT5G13750	ZIFL1	Protein ZINC INDUCED FACILITATOR-LIKE 1	LOC_Os11g04104	major facilitator superfamily antiporter
TraesCS1B02G291900	1.11465	0.000298347	0.00186594	Up	AT5G02130	NDP1	Tetratricopeptide repeat (TPR)-like superfamily protein	LOC_Os05g38330	NDP1
TraesCS5A02G020100	1.11439	0.0004092	0.00241995	Up	AT2G07707	YMF19	ATP synthase protein YMF19	LOC_Os12g34018	ATP synthase protein YMF19
TraesCS2A02G285300	1.11374	0.0138954	0.0434584	Up	AT3G01990	ACR6	ACT domain-containing protein ACR6	LOC_Os04g32110	ACT domain containing protein
TraesCS7A02G099400	1.113	0.0125199	0.0399183	Up	AT2G07675		Ribosomal protein S12/S23 family protein	LOC_Os12g34062	mitochondrial ribosomal protein S12
TraesCS4D02G169800	1.11277	0.000669372	0.00362547	Up	AT4G02280	SUS3	Sucrose synthase 3	LOC_Os03g22120	sucrose synthase
TraesCS6B02G232600	1.11219	0.000113252	0.000841517	Up	ATMG00090		structural constituent of ribosome%3Bprotein binding	LOC_Os12g34054	mitochondrial ribosomal protein S3
TraesCS2A02G214400	1.11076	1.10793e-06	1.83711e-05	Up	AT5G48150	PAT1	Scarecrow-like transcription factor PAT1	LOC_Os07g36170	chitin-inducible gibberellin-responsive protein
TraesCS3A02G330400	1.11038	0.00366347	0.0145501	Up	AT5G03990		unknown protein%3B BEST Arabidopsis thaliana protein match is: unknown protein (TAIR:AT3G51940.1)%3B Has 30201 Blast hits to 17322 proteins in 780 species: Archae - 12%3B Bacteria - 1396%3B Metazoa - 17338%3B Fungi - 3422%3B Plants - 5037%3B Viruses - 0%3B Other Eu /.../es - 2996 (source: NCBI BLink).	LOC_Os01g58700	expressed protein
TraesCS7B02G429300	1.10944	0.000732112	0.00390629	Up	ATMG00080	RPL16	ribosomal protein L16	LOC_Os12g34056	mitochondrial 60S ribosomal protein L16
TraesCS5D02G402200	1.10843	0.000835094	0.00435237	Up	AT5G60940	CSTF50	Cleavage stimulation factor subunit 50	LOC_Os03g54770	WD domain
TraesCS4D02G131700	1.10821	0.000178635	0.00122273	Up	AT2G40300	FER4	Ferritin-4%2C chloroplastic	LOC_Os12g01530	ferritin-1
TraesCS5A02G544900	1.10695	0.00356898	0.0142437	Up	AT5G41150	UVH1	DNA repair endonuclease UVH1	LOC_Os03g01100	endonuclease
TraesCS7D02G318400	1.10679	0.000134065	0.000965618	Up	AT2G02570		nucleic acid binding%3BRNA binding	LOC_Os08g01840	nucleic acid binding protein
TraesCS1A02G206100	1.10589	0.00847349	0.0289601	Up	AT1G02610		RING/FYVE/PHD zinc finger superfamily protein	LOC_Os01g19800	zinc finger
TraesCS5D02G166200	1.10581	0.0061121	0.0221418	Up	AT1G72190		D-isomer specific 2-hydroxyacid dehydrogenase family protein	LOC_Os07g16040	erythronate-4-phosphate dehydrogenase domain containing protein
TraesCS2B02G360900	1.10574	0.00116	0.00568958	Up	AT5G40640		unknown protein%3B LOCATED IN: plasma membrane%3B EXPRESSED IN: 19 plant structures%3B EXPRESSED DURING: 7 growth stages%3B BEST Arabidopsis thaliana protein match is: unknown protein (TAIR:AT3G27390.1)%3B Has 104 Blast hits to 102 proteins in 14 species: Arc /.../0%3B Bacteria - 0%3B Metazoa - 2%3B Fungi - 0%3B Plants - 101%3B Viruses - 0%3B Other Eukaryotes - 1 (source: NCBI BLink).	LOC_Os04g40700	steroid nuclear receptor
TraesCS1D02G307500	1.10358	7.5637e-07	1.3395e-05	Up	AT5G06100	MYB33	myb domain protein 33	LOC_Os01g59660	MYB family transcription factor
TraesCS4B02G124800	1.10347	0.012606	0.0401481	Up	AT5G53970		Probable aminotransferase TAT2	LOC_Os11g42510	tyrosine aminotransferase
TraesCS6A02G094000	1.10333	0.000666787	0.00361353	Up				LOC_Os03g08430	SAC domain containing protein
TraesCS4D02G140300	1.10298	8.60361e-06	0.000100216	Up	ATMG00520	MATR	Intron maturase%2C type II family protein	LOC_Os12g33956	maturase
TraesCS5B02G373200	1.10217	2.5049e-05	0.000242223	Up	AT3G22980		Ribosomal protein S5/Elongation factor G/III/V family protein	LOC_Os03g44780	elongation factor Tu family protein
TraesCS7D02G313000	1.10205	0.007257	0.025476	Up	AT2G45340		Leucine-rich repeat protein kinase family protein	LOC_Os08g02440	expressed protein
TraesCS4D02G095400	1.10156	6.55564e-05	0.000535357	Up	AT1G21640	NADK2	NAD kinase 2%2C chloroplastic	LOC_Os11g08670	NAD kinase
TraesCS3A02G448200	1.10047	0.00143968	0.00678257	Up	AT1G02850	BGLU11	Beta-glucosidase 11	LOC_Os05g30350	Os5bglu22 - beta-glucosidase homologue
TraesCS4A02G272600	1.10006	0.000637085	0.00348265	Up				LOC_Os03g49630	expressed protein
TraesCS1B02G238400	1.09918	0.0129662	0.0410965	Up	AT4G23280	CRK20	cysteine-rich RLK (RECEPTOR-like protein kinase) 20	LOC_Os06g47530	TKL_IRAK_DUF26-lh.6 - DUF26 kinases have homology to DUF26 containing loci
TraesCS3B02G218300	1.09858	0.00858483	0.0292624	Up	AT4G30870	MUS81	Crossover junction endonuclease MUS81	LOC_Os01g71960	endonuclease
TraesCS3B02G121500	1.09769	0.000925208	0.00473044	Up
TraesCS2A02G184200	1.0974	0.0103729	0.0342354	Up	AT3G03900	APK3	Adenylyl-sulfate kinase 3	LOC_Os07g38560	adenylyl-sulfate kinase
TraesCS5A02G124600	1.09693	0.0134654	0.0423668	Up	AT1G43700	VIP1	Transcription factor VIP1	LOC_Os12g06520	bZIP transcription factor domain containing protein
TraesCS1A02G376400	1.09555	7.25004e-05	0.000581243	Up	AT3G18390	EMB1865	CRS1 / YhbY (CRM) domain-containing protein	LOC_Os05g47850	chloroplastic group IIA intron splicing facilitator CRS1
TraesCS1D02G272300	1.09489	0.0068653	0.024359	Up	AT1G43190	PTB3	Polypyrimidine tract-binding protein homolog 3	LOC_Os05g36120	polypyrimidine tract-binding protein
TraesCS3B02G213400	1.09477	0.000469293	0.0027107	Up	AT2G41050		PQ-loop repeat family protein / transmembrane family protein	LOC_Os01g16170	PQ loop repeat domain containing protein
TraesCS5B02G392600	1.09353	0.000160541	0.0011204	Up	AT4G16440		ferredoxin hydrogenases	LOC_Os03g53750	nuclear prelamin A recognition factor
TraesCSU02G086600	1.09335	0.00113808	0.00560092	Up	AT1G02020		nitroreductase family protein	LOC_Os10g11340	nitroreductase family protein
TraesCS7D02G026300	1.09212	0.0142379	0.0443541	Up	AT1G32560		Late embryogenesis abundant protein%2C group 1 protein	LOC_Os06g02040	late embryogenesis abundant group 1
TraesCS7B02G240200	1.09206	0.00224281	0.00974357	Up	AT5G52440	TATB	Sec-independent protein translocase protein TATB%2C chloroplastic	LOC_Os11g37130	mttA/Hcf106 family protein
TraesCS4D02G228900	1.09183	2.75829e-06	3.92259e-05	Up	AT2G17840	ERD7	Senescence/dehydration-associated protein-related	LOC_Os03g13840	senescence-associated protein
TraesCS2B02G112000	1.09161	0.000202633	0.00135791	Up	AT3G06560	PAPS3	Nuclear poly(A) polymerase 3	LOC_Os07g48890	expressed protein
TraesCS5B02G337300	1.09133	4.46231e-11	3.53947e-09	Up	AT4G38470		ACT-like protein tyrosine kinase family protein	LOC_Os09g37230	protein kinase family protein
TraesCS2A02G255300	1.09127	0.0001005	0.000763771	Up	AT2G16250		Probable LRR receptor-like serine/threonine-protein kinase At2g16250	LOC_Os07g04220	wound and phytochrome signaling involved receptor like kinase
TraesCS6B02G338700	1.08844	0.000522996	0.00296203	Up	AT2G07675		Ribosomal protein S12/S23 family protein	LOC_Os12g34062	mitochondrial ribosomal protein S12
TraesCS7A02G287100	1.08697	2.56787e-05	0.000247051	Up	AT5G57710		Double Clp-N motif-containing P-loop nucleoside triphosphate hydrolases superfamily protein	LOC_Os08g15230	heat shock protein-related
TraesCS2B02G351700	1.08615	0.000586512	0.00325368	Up	AT2G07725		Ribosomal L5P family protein	LOC_Os09g08890	mitochondrial 60S ribosomal protein L5
TraesCS2A02G374300	1.08509	0.000313993	0.00194467	Up	AT1G28150		UPF0426 protein At1g28150%2C chloroplastic	LOC_Os04g44590	expressed protein
TraesCS7A02G521200	1.08477	0.00376397	0.0148722	Up	AT1G12350	PPCS1	Phosphopantothenate--cysteine ligase 1	LOC_Os08g07880	phosphopantothenate--cysteine ligase
TraesCS4D02G166200	1.08432	0.00606994	0.0220312	Up	AT4G31530		NAD(P)-binding Rossmann-fold superfamily protein	LOC_Os03g23980	NAD dependent epimerase/dehydratase family protein
TraesCS5D02G359900	1.0841	0.0128366	0.0407526	Up	AT2G17530		Protein kinase superfamily protein	LOC_Os09g37949	serine/threonine-protein kinase SRPK1
TraesCS3B02G593900	1.08353	0.0143965	0.0447583	Up	AT3G14470	RPPL1	Putative disease resistance RPP13-like protein 1	LOC_Os11g10550	NBS-LRR disease resistance protein
TraesCS7D02G121200	1.08332	0.000105763	0.000795537	Up	AT5G25770		alpha/beta-Hydrolases superfamily protein	LOC_Os06g06770	OsPOP11 - Putative Prolyl Oligopeptidase homologue
TraesCS3B02G140700	1.08271	0.00429766	0.0165914	Up	AT1G04250	IAA17	Auxin-responsive protein IAA17	LOC_Os01g08320	OsIAA1 - Auxin-responsive Aux/IAA gene family member
TraesCS5D02G380200	1.08212	0.000196196	0.00132119	Up	AT2G38920	RF178	Probable E3 ubiquitin-protein ligase BAH1-like	LOC_Os03g44810	expressed protein
TraesCS7D02G068700	1.08072	0.00232744	0.0100408	Up	AT4G12130		Glycine cleavage T-protein family	LOC_Os06g04380	aminomethyltransferase
TraesCS1B02G372600	1.08051	0.00487762	0.0184081	Up	AT3G04880	DRT102	DNA-damage-repair/toleration protein DRT102	LOC_Os01g36090	DNA-damage-repair/toleration protein DRT102
TraesCS3B02G610500	1.07965	1.40672e-05	0.000151044	Up				LOC_Os05g02260	expressed protein
TraesCS2D02G488200	1.07924	0.0100598	0.0333856	Up	AT2G42130	PAP13	Probable plastid-lipid-associated protein 13%2C chloroplastic	LOC_Os04g57020	expressed protein
TraesCS7D02G224900	1.0775	0.0125837	0.0400934	Up	AT1G70200		RNA-binding (RRM/RBD/RNP motifs) family protein	LOC_Os02g22070	expressed protein
TraesCS5D02G065100	1.07663	0.000434876	0.00254684	Up	AT1G03090	MCCA	Methylcrotonoyl-CoA carboxylase subunit alpha%2C mitochondrial	LOC_Os12g41250	methylcrotonoyl-CoA carboxylase subunit alpha
TraesCS6B02G308000	1.07656	9.82247e-06	0.000111936	Up	AT2G17410	ARID3	AT-rich interactive domain-containing protein 3	LOC_Os02g48370	ARID/BRIGHT DNA-binding domain-containing protein
TraesCS7A02G219100	1.07639	0.0137769	0.0431592	Up	AT4G35830	ACO1	Aconitate hydratase 1	LOC_Os08g09200	aconitate hydratase protein
TraesCS5B02G078400	1.07617	0.000507607	0.0028904	Up	AT1G49850		RING/U-box superfamily protein	LOC_Os12g39110	zinc finger
TraesCS1B02G413000	1.07505	4.44468e-06	5.77926e-05	Up	AT2G07727	MT-CYB	Di-haem cytochrome%2C transmembrane%3BCytochrome b/b6%2C C-terminal	LOC_Os01g57942	cytochrome b6
TraesCS7B02G085200	1.07495	0.00014367	0.0010234	Up	AT4G39870		TLD-domain containing nucleolar protein	LOC_Os06g11790	TLD family protein
TraesCS3A02G202300	1.07404	0.00471575	0.0179193	Up	AT2G32590	CAPH	Condensin complex subunit 2	LOC_Os01g34870	expressed protein
TraesCS4D02G058300	1.07299	0.000129383	0.000937914	Up	AT3G49725		GTP-binding protein At3g49725%2C chloroplastic	LOC_Os03g51790	GTPase of unknown function domain containing protein
TraesCS3A02G326700	1.0727	0.00147103	0.00689835	Up	AT4G27020		unknown protein%3B FUNCTIONS IN: molecular_function unknown%3B LOCATED IN: vacuole%3B BEST Arabidopsis thaliana protein match is: unknown protein (TAIR:AT5G54870.1)%3B Has 1807 Blast hits to 1807 proteins in 277 species: Archae - 0%3B Bacteria - 0%3B Metazoa - /.../ungi - 347%3B Plants - 385%3B Viruses - 0%3B Other Eukaryotes - 339 (source: NCBI BLink).	LOC_Os01g58114	expressed protein
TraesCS7A02G165200	1.07252	1.99974e-07	4.44863e-06	Up	ATMG00580	NAD4	NADH dehydrogenase subunit 4	LOC_Os12g34094	NADH-ubiquinone oxidoreductase chain 4
TraesCS1A02G036100	1.07244	6.79808e-05	0.000551458	Up	AT2G39570	ACR9	ACT domain-containing protein ACR9	LOC_Os05g02220	ACT domain containing protein
TraesCS3B02G205600	1.07024	0.000376428	0.00225885	Up	AT5G27720	LSM4	Sm-like protein LSM4	LOC_Os01g15310	LSM domain containing protein
TraesCS2B02G238400	1.06997	0.0156369	0.0478454	Up	AT4G02550		unknown protein%3B BEST Arabidopsis thaliana protein match is: unknown protein (TAIR:AT4G02210.2)%3B Has 350 Blast hits to 284 proteins in 18 species: Archae - 0%3B Bacteria - 0%3B Metazoa - 0%3B Fungi - 13%3B Plants - 331%3B Viruses - 0%3B Other Eukaryotes - 6 (so /.../NCBI BLink).	LOC_Os11g07330	expressed protein
TraesCS1B02G404000	1.06754	0.0131454	0.0415547	Up	AT1G15110	PSS1	CDP-diacylglycerol--serine O-phosphatidyltransferase 1	LOC_Os05g48060	phosphatidylserine synthase
TraesCS3D02G412900	1.06734	0.00782005	0.0271051	Up	AT4G05460	SKIP19	F-box protein SKIP19	LOC_Os08g09390	OsFBX264 - F-box domain containing protein
TraesCS6A02G187900	1.06718	0.000862567	0.0044673	Up	AT4G26180		Mitochondrial substrate carrier family protein	LOC_Os02g13300	mitochondrial carrier protein
TraesCS4B02G301800	1.06648	0.00125488	0.00606453	Up	AT4G34310		alpha/beta-Hydrolases superfamily protein	LOC_Os03g08700	expressed protein
TraesCS2A02G518700	1.06639	0.00189808	0.00850972	Up	AT5G66930		unknown protein%3B CONTAINS InterPro DOMAIN/s: Protein of unknown function DUF1649 (InterPro:IPR012445)%3B Has 236 Blast hits to 236 proteins in 105 species: Archae - 0%3B Bacteria - 0%3B Metazoa - 93%3B Fungi - 70%3B Plants - 56%3B Viruses - 0%3B Other Eukaryotes /.../source: NCBI BLink).	LOC_Os12g26044	expressed protein
TraesCS3D02G197000	1.06633	0.000122194	0.000895635	Up	ATMG00580	NAD4	NADH dehydrogenase subunit 4	LOC_Os12g34094	NADH-ubiquinone oxidoreductase chain 4
TraesCS6A02G282300	1.06542	0.00891794	0.0302109	Up	AT2G04842	EMB2761	threonyl-tRNA synthetase%2C putative / threonine--tRNA ligase%2C putative	LOC_Os02g33500	threonyl-tRNA synthetase
TraesCS7B02G041900	1.06506	0.00441904	0.0169818	Up	AT5G20400		2-oxoglutarate (2OG) and Fe(II)-dependent oxygenase superfamily protein	LOC_Os06g08023	flavonol synthase/flavanone 3-hydroxylase
TraesCS5B02G200800	1.06253	0.0133187	0.0419989	Up	AT3G48090	EDS1	Protein EDS1	LOC_Os09g22450	lipase
TraesCS7A02G098500	1.06213	0.0101392	0.0335961	Up	ATMG01360	COX1	Cytochrome c oxidase subunit 1	LOC_Os12g33946	cytochrome c oxidase subunit 1
TraesCS3A02G076900	1.06111	0.000223029	0.0014707	Up	AT5G59960		unknown protein%3B FUNCTIONS IN: molecular_function unknown%3B INVOLVED IN: biological_process unknown%3B LOCATED IN: nucleus%3B EXPRESSED IN: 24 plant structures%3B EXPRESSED DURING: 15 growth stages%3B Has 30201 Blast hits to 17322 proteins in 780 species: Ar /.../ 12%3B Bacteria - 1396%3B Metazoa - 17338%3B Fungi - 3422%3B Plants - 5037%3B Viruses - 0%3B Other Eukaryotes - 2996 (source: NCBI B…	LOC_Os01g05830	expressed protein
TraesCS4A02G059400	1.06072	0.00791462	0.0273798	Up	AT1G70440	SRO3	Probable inactive poly	LOC_Os03g12820	ATP8
TraesCS3A02G183600	1.06064	0.000232336	0.00151907	Up	AT2G41050		PQ-loop repeat family protein / transmembrane family protein	LOC_Os01g16170	PQ loop repeat domain containing protein
TraesCS7A02G097600	1.05963	6.36084e-05	0.000522194	Up	ATMG00516	NAD1C	NADH dehydrogenase 1C	LOC_Os01g33960	transposon protein
TraesCS2A02G292900	1.05916	4.51267e-07	8.78844e-06	Up	AT5G22510	INVE	Alkaline/neutral invertase E%2C chloroplastic	LOC_Os02g32730	neutral/alkaline invertase
TraesCS5B02G485000	1.05909	0.00490918	0.0185103	Up	AT5G24960	CYP71A14	Cytochrome P450 71A14	LOC_Os08g01490	cytochrome P450
TraesCS4A02G096100	1.05902	0.0023579	0.01015	Up				LOC_Os03g16580	expressed protein
TraesCS2D02G130800	1.05892	0.000196029	0.00132051	Up	AT1G08660	MGP2	MALE GAMETOPHYTE DEFECTIVE 2	LOC_Os11g36420	sialyltransferase family domain containing protein
TraesCS4A02G112800	1.05841	0.011893	0.0382841	Up	AT1G07080		Thioredoxin superfamily protein	LOC_Os03g18454	gamma-interferon-inducible lysosomal thiol reductase precursor
TraesCS1B02G458600	1.05822	0.00462507	0.0176362	Up	ATMG00270	NAD6	NADH dehydrogenase 6	LOC_Os12g34014	NADH-ubiquinone oxidoreductase chain 6
TraesCS7A02G526200	1.05733	0.000380166	0.00227797	Up	ATMG00270	NAD6	NADH dehydrogenase 6	LOC_Os12g34014	NADH-ubiquinone oxidoreductase chain 6
TraesCS1D02G163200	1.05595	0.00102451	0.00513642	Up	AT4G16530		Family of unknown function (DUF577)	LOC_Os10g36340	expressed protein
TraesCS1B02G206000	1.05503	3.41263e-06	4.67515e-05	Up	AT5G65940	CHY1	3-hydroxyisobutyryl-CoA hydrolase 1	LOC_Os12g16350	enoyl-CoA hydratase/isomerase family protein
TraesCS3A02G273700	1.05487	0.0157069	0.0480114	Up	AT1G53120		RNA-binding S4 domain-containing protein	LOC_Os01g54390	S4 domain containing protein
TraesCS7A02G180000	1.05419	0.000306908	0.00190953	Up	AT4G39870		TLD-domain containing nucleolar protein	LOC_Os06g11790	TLD family protein
TraesCSU02G057400	1.05399	2.34333e-05	0.0002293	Up	ATMG00110	CCB206	cytochrome C biogenesis 206
TraesCS1B02G140800	1.05358	0.00143467	0.00676433	Up				LOC_Os05g09000	expressed protein
TraesCS5B02G303400	1.05268	0.0111022	0.0361725	Up	AT1G08760		Plant protein of unknown function (DUF936)	LOC_Os09g34110	expressed protein
TraesCS2A02G509100	1.05171	3.7913e-06	5.08078e-05	Up	ATMG00580	NAD4	NADH dehydrogenase subunit 4	LOC_Os12g34094	NADH-ubiquinone oxidoreductase chain 4
TraesCS5A02G019900	1.05151	0.00103366	0.00517299	Up	ATMG01190	ATP1	ATP synthase subunit 1	LOC_Os09g08910	ATP synthase
TraesCS5A02G096000	1.05117	0.0032797	0.0133067	Up	AT1G61040	VIP5	Protein RTF1 homolog	LOC_Os12g35030	plus-3 domain containing protein
TraesCS7B02G208500	1.05112	0.000197646	0.00132866	Up	AT4G15240		Protein of unknown function (DUF604)	LOC_Os08g04300	fringe-related protein
TraesCS6B02G170700	1.05076	0.0099483	0.0330793	Up	AT4G01830	ABCB5	ABC transporter B family member 5	LOC_Os08g05710	ABC transporter
TraesCS5A02G020500	1.05053	0.0163331	0.0495706	Up
TraesCS4D02G273700	1.05006	0.00379622	0.0149766	Up	AT3G50950	RPP13L4	Disease resistance RPP13-like protein 4	LOC_Os11g43500	NBS-LRR type disease resistance protein
TraesCS1D02G004300	1.04935	0.000867601	0.00448915	Up	AT5G38560	PERK8	Proline-rich receptor-like protein kinase PERK8	LOC_Os05g01040	serine/threonine-protein kinase
TraesCS5D02G129300	1.04897	0.000580592	0.00322689	Up	AT1G76730	COG0212	5-formyltetrahydrofolate cyclo-ligase-like protein COG0212	LOC_Os12g07020	5-formyltetrahydrofolate cyclo-ligase
TraesCS1B02G129600	1.04798	0.000333671	0.00204502	Up	AT2G37150		RING/U-box superfamily protein	LOC_Os05g07070	zinc finger
TraesCS3A02G143300	1.04721	0.0046092	0.0175845	Up	AT4G27910	ATX4	Histone-lysine N-methyltransferase ATX4	LOC_Os01g11952	histone-lysine N-methyltransferase ATX5
TraesCS7A02G416600	1.04422	0.00518235	0.0193485	Up	AT3G46730	RPP13L3	Putative disease resistance RPP13-like protein 3	LOC_Os08g28540	resistance protein LR10
TraesCS5B02G514900	1.04337	0.000569834	0.00317903	Up
TraesCS3B02G129800	1.0433	0.000111866	0.000832919	Up	AT2G02710	TLP1	Protein TWIN LOV 1	LOC_Os01g09120	Twin LOV 1
TraesCS3A02G233800	1.04304	0.000324514	0.00199899	Up	AT2G26650	AKT1	Potassium channel AKT1	LOC_Os01g45990	potassium channel AKT1
TraesCS5D02G305100	1.04269	0.00139424	0.0066102	Up	AT5G48440		FAD-dependent oxidoreductase family protein	LOC_Os09g33900	FAD dependent oxidoreductase domain containing protein
TraesCS2B02G169300	1.04226	0.000582828	0.0032365	Up	AT3G14590	NTMC2T6.2	Calcium-dependent lipid-binding (CaLB domain) family protein	LOC_Os02g20970	C2 domain containing protein
TraesCS2D02G276000	1.04197	0.00900771	0.0304617	Up	AT5G48570	FKBP65	Peptidyl-prolyl cis-trans isomerase FKBP65	LOC_Os04g28420	peptidyl-prolyl isomerase
TraesCS6D02G283500	1.04178	0.00147862	0.00692775	Up	AT2G33190		Putative F-box protein At2g33190	LOC_Os03g51090	OsFBDUF17 - F-box and DUF domain containing protein
TraesCS3A02G282800	1.04137	0.000372204	0.00223804	Up	AT3G01090	KIN10	SNF1-related protein kinase catalytic subunit alpha KIN10	LOC_Os05g45420	CAMK_KIN1/SNF1/Nim1_like_AMPKh.3 - CAMK includes calcium/calmodulin depedent protein kinases
TraesCS6A02G315400	1.04123	0.00845766	0.0289163	Up	AT1G73400		Pentatricopeptide repeat-containing protein At1g73400%2C mitochondrial	LOC_Os02g52220	PPR repeat domain containing protein
TraesCS7B02G116700	1.04086	0.00219063	0.00955544	Up	AT2G40540	POT2	Potassium transporter 2	LOC_Os01g27170	potassium transporter
TraesCS2B02G153900	1.04081	0.00805902	0.0277911	Up	AT1G23890		NHL domain-containing protein	LOC_Os08g31970	NHL repeat-containing protein
TraesCS2B02G382300	1.04076	0.00021868	0.00144696	Up	AT2G38970		Zinc finger (C3HC4-type RING finger) family protein	LOC_Os04g42980	zinc finger family protein
TraesCS1D02G128300	1.03964	7.28691e-05	0.000583754	Up	ATMG00180	CCB452	cytochrome C biogenesis 452
TraesCS1A02G145800	1.03938	0.000595818	0.00329681	Up	AT1G07040		unknown protein%3B INVOLVED IN: biological_process unknown%3B LOCATED IN: chloroplast%3B EXPRESSED IN: 24 plant structures%3B EXPRESSED DURING: 14 growth stages%3B BEST Arabidopsis thaliana protein match is: unknown protein (TAIR:AT1G27030.1)%3B Has 540 Blast h /.../ 538 proteins in 187 species: Archae - 0%3B Bacteria - 333%3B Metazoa - 0%3B Fungi - 0%3B Plants - 67%3B Viruses - 0%3B Other Eukary…	LOC_Os10g32680	expressed protein
TraesCS6A02G328100	1.03932	0.0154562	0.0474042	Up	AT4G31570		CONTAINS InterPro DOMAIN/s: Prefoldin (InterPro:IPR009053)%3B BEST Arabidopsis thaliana protein match is: unknown protein (TAIR:AT1G24460.1)%3B Has 194354 Blast hits to 66887 proteins in 3244 species: Archae - 3688%3B Bacteria - 38556%3B Metazoa - 84828%3B Fu /.../17265%3B Plants - 10589%3B Viruses - 805%3B Other Eukaryotes - 38623 (source: NCBI BLink).	LOC_Os05g04390	expressed protein
TraesCS4D02G263800	1.03851	0.00115435	0.00566745	Up	AT2G35760		CASP-like protein 2B2	LOC_Os03g10030	membrane associated DUF588 domain containing protein
TraesCS7B02G280000	1.0383	1.13982e-05	0.000127022	Up	AT1G64140		BEST Arabidopsis thaliana protein match is: loricrin-related (TAIR:AT5G64550.1)%3B Has 3596 Blast hits to 2004 proteins in 150 species: Archae - 0%3B Bacteria - 54%3B Metazoa - 1597%3B Fungi - 38%3B Plants - 513%3B Viruses - 9%3B Other Eukaryotes - 1385 (source: /.../Link).	LOC_Os02g15880	CPuORF16 - conserved peptide uORF-containing transcript
TraesCS2A02G353700	1.03798	0.0008023	0.00421251	Up
TraesCS1B02G207100	1.03769	0.0113061	0.0367077	Up	AT2G03820		nonsense-mediated mRNA decay NMD3 family protein	LOC_Os10g42320	nonsense-mediated mRNA decay protein 3
TraesCS2A02G000400	1.0373	0.000984071	0.0049713	Up	AT5G51760	AHG1	Probable protein phosphatase 2C 75	LOC_Os05g38290	protein phosphatase 2C
TraesCS2B02G209500	1.03609	0.000148493	0.00105088	Up	AT5G07740	FH20	Formin-like protein 20	LOC_Os07g40520	formin-like protein 20
TraesCS6A02G177100	1.03462	0.000605327	0.00334028	Up	AT4G32440		Plant Tudor-like RNA-binding protein	LOC_Os02g11000	agenet domain containing protein
TraesCS3D02G311700	1.03414	3.37482e-07	6.88525e-06	Up	AT5G22850		Eukaryotic aspartyl protease family protein	LOC_Os01g56930	eukaryotic aspartyl protease domain containing protein
TraesCS2B02G185900	1.03392	0.00134485	0.00642235	Up	AT3G23330	PCMP-H32	Putative pentatricopeptide repeat-containing protein At3g23330	LOC_Os07g39090	pentatricopeptide repeat domain containing protein
TraesCS3D02G209200	1.03306	0.00156408	0.00726424	Up	AT2G26190		calmodulin-binding family protein	LOC_Os01g38980	calmodulin-binding protein
TraesCS1D02G192700	1.03283	0.00731347	0.0256381	Up	AT3G10400	SNRNP31	U11/U12 small nuclear ribonucleoprotein 31 kDa protein	LOC_Os10g39010	TKL_IRAK_CrRLK1L-1.16 - The CrRLK1L-1 subfamily has homology to the CrRLK1L homolog
TraesCS7A02G183100	1.03271	0.00606092	0.0220056	Up	AT1G53210		sodium/calcium exchanger family protein / calcium-binding EF hand family protein	LOC_Os02g14980	calcium-binding EF hand family protein
TraesCSU02G077100	1.03177	0.0112388	0.0365342	Up	AT5G45460		unknown protein%3B BEST Arabidopsis thaliana protein match is: Protein of unknown function (DUF594) (TAIR:AT5G45470.1)%3B Has 30201 Blast hits to 17322 proteins in 780 species: Archae - 12%3B Bacteria - 1396%3B Metazoa - 17338%3B Fungi - 3422%3B Plants - 5037%3B /.../s - 0%3B Other Eukaryotes - 2996 (source: NCBI BLink).	LOC_Os05g25890	expressed protein
TraesCS5B02G282900	1.03134	1.05785e-05	0.000119063	Up	AT1G04860	UBP2	Ubiquitin carboxyl-terminal hydrolase 2	LOC_Os09g32740	ubiquitin carboxyl-terminal hydrolase family protein
TraesCS5B02G380500	1.03042	0.000420435	0.00247685	Up	AT3G13050	2025-10-07	Organic cation/carnitine transporter 7	LOC_Os03g43720	transporter family protein
TraesCS7D02G238800	1.03001	0.00276143	0.0115512	Up	ATMG00520	MATR	Intron maturase%2C type II family protein	LOC_Os12g33956	maturase
TraesCS5A02G321300	1.02916	0.00334306	0.0135065	Up	AT5G51070	CLPD	Chaperone protein ClpD%2C chloroplastic	LOC_Os12g12850	ATP-dependent Clp protease ATP-binding subunit clpA homolog
TraesCS2A02G179700	1.02907	0.00868495	0.0295484	Up	AT3G07040	RPM1	Disease resistance protein RPM1	LOC_Os07g40810	NBS-LRR type disease resistance protein
TraesCS1B02G341700	1.02808	7.99485e-05	0.000630708	Up	AT5G22470	PARP3	Poly	LOC_Os02g32860	poly synthetase 3
TraesCS7D02G442700	1.02792	0.00069881	0.00375512	Up	AT4G02890	UBQ14	Polyubiquitin 11	LOC_Os02g06640	ubiquitin family protein
TraesCS3A02G181300	1.027	7.92627e-06	9.36854e-05	Up	ATMG00060	NAD5C	NADH dehydrogenase subunit 5C	LOC_Os10g21418	NADPH-dependent oxidoreductase
TraesCS7D02G220300	1.02606	2.47831e-07	5.32811e-06	Up	AT3G07650	COL9	Zinc finger protein CONSTANS-LIKE 9	LOC_Os06g19444	CCT/B-box zinc finger protein
TraesCS1A02G416500	1.02555	0.00296109	0.0122228	Up	AT3G27930		unknown protein%3B FUNCTIONS IN: molecular_function unknown%3B INVOLVED IN: N-terminal protein myristoylation%3B LOCATED IN: cellular_component unknown%3B EXPRESSED IN: 23 plant structures%3B EXPRESSED DURING: 14 growth stages%3B Has 35 Blast hits to 35 protein /.../2 species: Archae - 0%3B Bacteria - 0%3B Metazoa - 0%3B Fungi - 0%3B Plants - 35%3B Viruses - 0%3B Other Eukaryotes - 0 (source: NCB…	LOC_Os05g50200	expressed protein
TraesCS2D02G221400	1.02526	0.00182604	0.00824407	Up	AT4G23180	CRK10	Cysteine-rich receptor-like protein kinase 10	LOC_Os07g35690	TKL_IRAK_DUF26-lc.3 - DUF26 kinases have homology to DUF26 containing loci
TraesCS5D02G222200	1.0243	0.0123125	0.0393671	Up	AT4G21090	MFDX2	Adrenodoxin-like protein 2%2C mitochondrial	LOC_Os09g26650	2Fe-2S iron-sulfur cluster binding domain containing protein
TraesCS1D02G225700	1.02424	0.0044669	0.0171352	Up	AT2G40170	EM6	Em-like protein GEA6	LOC_Os05g28210	small hydrophilic plant seed protein
TraesCS1B02G445200	1.02344	0.00394764	0.0154619	Up	AT3G25690	CHUP1	Protein CHUP1%2C chloroplastic	LOC_Os12g01449	chloroplast unusual positioning protein
TraesCSU02G118700	1.02341	0.0101322	0.0335742	Up	AT2G17080		Arabidopsis protein of unknown function (DUF241)	LOC_Os08g43870	carrier
TraesCS1D02G152500	1.02215	0.00503566	0.0188946	Up	AT1G77750	RPS13	Small ribosomal subunit protein S13%2C mitochondrial	LOC_Os03g49710	ribosomal protein S13p/S18e
TraesCS6B02G246700	1.0218	2.42423e-05	0.000235866	Up	AT2G43630		FUNCTIONS IN: molecular_function unknown%3B INVOLVED IN: biological_process unknown%3B LOCATED IN: chloroplast thylakoid membrane%2C chloroplast%2C nucleus%2C chloroplast envelope%3B EXPRESSED IN: 22 plant structures%3B EXPRESSED DURING: 13 growth stages%3B BEST Ar /.../sis thaliana protein match is: glycine-rich protein (TAIR:AT3G59640.2)%3B Has 67 Blast hits to 67 proteins in 20 species: Archae…	LOC_Os02g39340	glycine-rich protein
TraesCS5A02G104900	1.02179	0.000141366	0.00100994	Up	AT2G03340	WRKY3	Probable WRKY transcription factor 3	LOC_Os12g32250	WRKY96
TraesCS1A02G041000	1.02078	0.00504417	0.0189183	Up				LOC_Os12g23620	expressed protein
TraesCS3B02G006200	1.02051	0.00362675	0.0144366	Up	AT5G40270		HD domain-containing metal-dependent phosphohydrolase family protein	LOC_Os01g01920	HD domain containing protein 2
TraesCS2A02G010200	1.02001	0.000992757	0.00500557	Up	AT1G64720	CP5	Polyketide cyclase/dehydrase and lipid transport superfamily protein	LOC_Os04g02910	membrane related protein CP5
TraesCS4A02G070100	1.01912	0.000253065	0.00163108	Up	ATMG00070	NAD9	NADH dehydrogenase subunit 9
TraesCS4B02G131500	1.01889	0.000131059	0.000947796	Up	AT5G13750	ZIFL1	Protein ZINC INDUCED FACILITATOR-LIKE 1	LOC_Os11g04104	major facilitator superfamily antiporter
TraesCS7D02G301300	1.01822	0.000370069	0.0022269	Up
TraesCS2A02G192400	1.01803	0.00142751	0.00673558	Up	AT5G56780	ATET2	effector of transcription2	LOC_Os07g39800	transcription repressor HOTR
TraesCS3B02G301300	1.01792	2.04736e-06	3.05767e-05	Up
TraesCS5D02G039600	1.0175	0.00385584	0.0151669	Up				LOC_Os05g49630	expressed protein
TraesCS4D02G174800	1.0169	0.00140853	0.00666565	Up	AT2G38650	GAUT7	Probable galacturonosyltransferase 7	LOC_Os03g21250	glycosyl transferase
TraesCS5B02G441600	1.0168	0.00172466	0.00786886	Up	AT3G22850		Aluminium induced protein with YGL and LRDR motifs	LOC_Os03g58170	stem-specific protein TSJT1
TraesCS3D02G343800	1.01604	4.07239e-05	0.000361966	Up	AT4G04770	ABCI8	UPF0051 protein ABCI8%2C chloroplastic	LOC_Os01g61400	sufB/sufD domain containing protein
TraesCS4A02G086800	1.01592	0.00675429	0.0240394	Up	AT3G03305		Putative metallophosphoesterase At3g03305	LOC_Os03g15430	Ser/Thr protein phosphatase family protein
TraesCS3B02G091100	1.01535	3.13372e-05	0.000292376	Up	AT5G59960		unknown protein%3B FUNCTIONS IN: molecular_function unknown%3B INVOLVED IN: biological_process unknown%3B LOCATED IN: nucleus%3B EXPRESSED IN: 24 plant structures%3B EXPRESSED DURING: 15 growth stages%3B Has 30201 Blast hits to 17322 proteins in 780 species: Ar /.../ 12%3B Bacteria - 1396%3B Metazoa - 17338%3B Fungi - 3422%3B Plants - 5037%3B Viruses - 0%3B Other Eukaryotes - 2996 (source: NCBI B…	LOC_Os01g05830	expressed protein
TraesCS2B02G222200	1.0152	0.0159708	0.0486737	Up				LOC_Os08g38620	expressed protein
TraesCS2D02G209300	1.01398	0.0100781	0.0334312	Up	AT1G11390		Protein kinase superfamily protein	LOC_Os07g37180	ABC1 family domain containing protein
TraesCS2D02G370900	1.01371	7.84343e-05	0.000620871	Up	AT5G58210		hydroxyproline-rich glycoprotein family protein	LOC_Os02g42550	expressed protein
TraesCS7A02G328100	1.01367	1.61288e-05	0.000168687	Up	AT3G54030		Protein kinase protein with tetratricopeptide repeat domain	LOC_Os04g58750	protein kinase family protein
TraesCS4D02G183700	1.01272	0.000132128	0.000954161	Up	AT3G17040	HCF107	high chlorophyll fluorescent 107	LOC_Os03g19560	tetratricopeptide repeat domain containing protein
TraesCS1D02G079700	1.01258	8.07217e-06	9.5066e-05	Up	AT5G26760		Putative RNA polymerase II subunit B1 CTD phosphatase RPAP2 homolog	LOC_Os05g04370	expressed protein
TraesCS1A02G192200	1.01197	0.003703	0.0146754	Up	AT1G22140		unknown protein%3B Has 40 Blast hits to 40 proteins in 14 species: Archae - 0%3B Bacteria - 0%3B Metazoa - 9%3B Fungi - 0%3B Plants - 28%3B Viruses - 0%3B Other Eukaryotes - 3 (source: NCBI BLink).	LOC_Os03g26791	expressed protein
TraesCS7D02G458400	1.01169	8.7057e-05	0.000676645	Up	AT2G30950	FTSH2	ATP-dependent zinc metalloprotease FTSH 2%2C chloroplastic	LOC_Os06g45820	OsFtsH2 FtsH protease
TraesCS7D02G337400	1.01111	0.000189668	0.0012843	Up	AT3G07790		DGCR14-related	LOC_Os06g30710	DGCR14
TraesCS7A02G224500	1.01087	0.000219605	0.00145217	Up	AT2G04740		BTB/POZ domain-containing protein At2g04740	LOC_Os06g21330	ABB1 - Ankyrin repeat region with 2 Bric-a-Brac
TraesCS1D02G280200	1.00989	0.0136681	0.0428849	Up	AT3G55646		unknown protein%3B FUNCTIONS IN: molecular_function unknown%3B INVOLVED IN: biological_process unknown%3B LOCATED IN: chloroplast%3B BEST Arabidopsis thaliana protein match is: unknown protein (TAIR:AT2G39855.2)%3B Has 35333 Blast hits to 34131 proteins in 24 /.../cies: Archae - 798%3B Bacteria - 22429%3B Metazoa - 974%3B Fungi - 991%3B Plants - 531%3B Viruses - 0%3B Other Eukaryotes - 9610 (sour…	LOC_Os05g38040	expressed protein
TraesCS4D02G201100	1.00981	0.00708023	0.0249736	Up	AT3G55040	GSTL2	Glutathione S-transferase L2%2C chloroplastic	LOC_Os03g17470	IN2-1 protein
TraesCS5D02G090400	1.00873	0.00236629	0.010182	Up	AT5G07710	NEN1	Protein NEN1	LOC_Os10g26730	exonuclease
TraesCS4A02G115200	1.00858	0.00175491	0.00797958	Up	AT2G38440	SCAR2	Protein SCAR2	LOC_Os03g18710	expressed protein
TraesCS7A02G326400	1.00808	4.15645e-07	8.18555e-06	Up	AT1G25280	TULP10	Tubby-like F-box protein 10	LOC_Os08g01290	OsFBT12 - F-box and tubby domain containing protein
TraesCS3D02G002700	1.00784	0.0107692	0.035283	Up	AT3G07040	RPM1	Disease resistance protein RPM1	LOC_Os12g31160	MLA10
TraesCS5A02G224100	1.0078	0.00129134	0.00621314	Up	AT3G15352	COX17-1	Cytochrome c oxidase copper chaperone 1	LOC_Os09g25314	cytochrome c oxidase copper chaperone
TraesCS3D02G251900	1.00722	0.0089548	0.0303109	Up	AT5G11950	LOG8	Cytokinin riboside 5'-monophosphate phosphoribohydrolase LOG8	LOC_Os01g51210	uncharacterized protein PA4923
TraesCS3D02G523300	1.00635	0.00213674	0.00936781	Up	ATCG00270	PSBD	Photosystem II D2 protein	LOC_Os10g41689	photosystem II D2 protein
TraesCS2D02G230000	1.00631	3.86798e-05	0.000346615	Up	ATMG01360	COX1	Cytochrome c oxidase subunit 1	LOC_Os12g33946	cytochrome c oxidase subunit 1
TraesCS5D02G172900	1.00611	0.0158718	0.0484233	Up	AT3G07700		Protein kinase superfamily protein	LOC_Os09g07660	ELMO/CED-12 family protein
TraesCS1A02G291400	1.00546	0.00027808	0.00176093	Up				LOC_Os02g20380	expressed protein
TraesCS5A02G207900	1.00441	5.38308e-05	0.00045648	Up	AT2G07698		ATPase%2C F1 complex%2C alpha subunit protein	LOC_Os09g08910	ATP synthase
TraesCS4D02G203300	1.00353	0.00137534	0.00653696	Up	AT3G12360	ITN1	Ankyrin repeat-containing protein At3g12360	LOC_Os03g17240	ankyrin repeat-containing protein
TraesCS6D02G298400	1.00115	3.33067e-06	4.58274e-05	Up	AT1G77680	SOV	Inactive exonuclease DIS3L2	LOC_Os02g51780	ribonuclease protein
TraesCS2B02G596400	1.00034	3.67812e-05	0.000332812	Up	AT2G20740	TOM2AH3	Tetraspanin-19	LOC_Os04g58330	expressed protein
TraesCS5A02G066100	1.00029	0.000101405	0.000769356	Up	AT2G07687	COX3	Cytochrome c oxidase%2C subunit III
TraesCS5A02G271100	1.00028	0.00327992	0.013307	Up	AT1G76620		Protein of unknown function%2C DUF547	LOC_Os09g32010	ternary complex factor MIP1
TraesCS4A02G284100	-1.00009	0.000181179	0.00123692	Down	AT1G67350		unknown protein%3B Has 2 Blast hits to 2 proteins in 1 species: Archae - 0%3B Bacteria - 0%3B Metazoa - 0%3B Fungi - 0%3B Plants - 2%3B Viruses - 0%3B Other Eukaryotes - 0 (source: NCBI BLink).	LOC_Os03g48110	expressed protein
TraesCS5D02G208000	-1.00035	0.00153203	0.00714127	Down	AT4G22140	EBS	PHD finger family protein / bromo-adjacent homology (BAH) domain-containing protein	LOC_Os09g21770	ES43 protein
TraesCS4A02G008100	-1.00039	0.00254852	0.010823	Down	AT1G16570		UDP-Glycosyltransferase superfamily protein	LOC_Os03g08300	glycosyl transferase
TraesCS4B02G367100	-1.00102	0.00566847	0.0208197	Down	AT5G07610		F-box protein At5g07610	LOC_Os07g35070	OsFBX239 - F-box domain containing protein
TraesCS4B02G058500	-1.00142	0.000155891	0.00109359	Down	AT4G07990		Chaperone DnaJ-domain superfamily protein	LOC_Os03g51830	heat shock protein DnaJ
TraesCS2A02G440000	-1.00146	0.00368804	0.0146265	Down	AT4G33260	CDC20-2	Cell division cycle 20.2%2C cofactor of APC complex	LOC_Os02g47180	WD repeat-containing protein
TraesCS6A02G200600	-1.0018	2.34401e-06	3.42989e-05	Down	AT5G55480	GDPDL4	Glycerophosphodiester phosphodiesterase GDPDL4	LOC_Os02g37590	glycerophosphoryl diester phosphodiesterase family protein
TraesCS6A02G096500	-1.00188	0.00210613	0.00925242	Down	AT4G04790		Pentatricopeptide repeat-containing protein At4g04790%2C mitochondrial	LOC_Os02g03970	PPR repeat domain containing protein
TraesCS5A02G410500	-1.00275	0.0131728	0.0416212	Down				LOC_Os12g07890	expressed protein
TraesCS5B02G220800	-1.00283	0.0026475	0.0111653	Down	AT5G10820		Probable folate-biopterin transporter 6	LOC_Os09g25560	BT1 family protein
TraesCS1A02G272900	-1.00331	0.00658664	0.0235609	Down
TraesCS3B02G387600	-1.00336	0.000834907	0.00435188	Down	AT4G40042		Microsomal signal peptidase 12 kDa subunit (SPC12)	LOC_Os12g25210	signal peptidase complex subunit 1
TraesCS6D02G025000	-1.00443	1.23285e-05	0.000135587	Down	AT2G45750		Probable methyltransferase PMT16	LOC_Os03g26200	methyltransferase
TraesCS1D02G298400	-1.00568	0.0155878	0.0477306	Down	AT5G46280	MCM3	DNA replication licensing factor MCM3	LOC_Os05g39850	MCM3 - Putative minichromosome maintenance MCM complex subunit 3
TraesCS2D02G130400	-1.00568	0.00150862	0.00704775	Down	AT4G21770		RNA pseudouridine synthase 6%2C chloroplastic	LOC_Os07g46600	RNA pseudouridine synthase
TraesCS5B02G008100	-1.00575	0.0158095	0.0482723	Down	AT4G36830	HOS3	Elongation of fatty acids protein 3-like	LOC_Os12g43890	GNS1/SUR4 membrane family protein
TraesCS2A02G302000	-1.00581	0.000134316	0.000967091	Down	AT1G20220		Alba DNA/RNA-binding protein	LOC_Os04g34940	protein of unknown function domain containing protein
TraesCS2A02G460718	-1.00613	0.00698596	0.0247131	Down
TraesCS5D02G031600	-1.00615	0.000200281	0.00134447	Down	AT5G39890	PCO2	Plant cysteine oxidase 2	LOC_Os12g42860	2-aminoethanethiol dioxygenase
TraesCS3A02G389800	-1.00639	0.000367045	0.00221095	Down	AT4G10110		RNA-binding (RRM/RBD/RNP motifs) family protein	LOC_Os05g35274	RNA recognition motif containing protein
TraesCS4B02G129400	-1.00649	0.0112258	0.0364983	Down	AT2G09990	RPS16A	40S ribosomal protein S16-1	LOC_Os11g03400	ribosomal protein
TraesCS2B02G178100	-1.007	0.00149797	0.00700283	Down	AT1G57590	PAE2	Pectin acetylesterase 2	LOC_Os07g44070	pectinacetylesterase domain containing protein
TraesCS7A02G383600	-1.0073	0.00847081	0.028955	Down	AT5G67220		FMN-linked oxidoreductases superfamily protein	LOC_Os06g49870	tRNA-dihydrouridine synthase
TraesCS2D02G507200	-1.00758	0.000273661	0.00173689	Down	AT5G20900	TIFY3B	Protein TIFY 3B	LOC_Os04g55920	zinc-finger protein
TraesCS3B02G389200	-1.00777	0.00563186	0.0207198	Down	AT3G09800		SNARE-like superfamily protein	LOC_Os05g38610	clathrin adaptor complex small chain domain containing protein
TraesCS1A02G112200	-1.00811	0.000764827	0.00405168	Down	AT2G30500	NET4B	Protein NETWORKED 4B	LOC_Os05g07680	KIP1
TraesCS2D02G263000	-1.00823	0.000216556	0.00143592	Down	AT5G48760	RPL13AD	60S ribosomal protein L13a-4	LOC_Os07g01870	ribosomal protein L13
TraesCS2D02G224300	-1.00871	0.00600705	0.0218448	Down	AT1G11545	XTH8	Probable xyloglucan endotransglucosylase/hydrolase protein 8	LOC_Os07g34580	glycosyl hydrolases family 16
TraesCS7D02G114500	-1.00887	0.00713783	0.0251304	Down				LOC_Os07g40160	expressed protein
TraesCS1D02G129600	-1.00923	0.00319962	0.0130466	Down	AT3G57510	ADPG1	Polygalacturonase ADPG1	LOC_Os07g10740	polygalacturonase
TraesCS6D02G153300	-1.00925	0.00122162	0.00593312	Down	AT2G04540	KAS	3-oxoacyl-	LOC_Os02g10320	3-oxoacyl-synthase
TraesCS6B02G130500	-1.00944	0.00185748	0.00835653	Down	AT3G18170		Glycosyltransferase family 61 protein	LOC_Os02g04250	glycosyltransferase
TraesCS7D02G501700	-1.00952	0.00367185	0.0145775	Down	AT2G04400		Indole-3-glycerol phosphate synthase%2C chloroplastic	LOC_Os08g23150	indole-3-glycerol phosphate synthase
TraesCS7A02G264000	-1.00957	0.0100632	0.0333933	Down	AT1G52630		O-fucosyltransferase family protein	LOC_Os08g42550	AP2 domain containing protein
TraesCS1D02G156400	-1.00967	0.00759675	0.0264667	Down	AT5G04800	RPS17D	40S ribosomal protein S17-4	LOC_Os10g27190	40S ribosomal protein S17
TraesCS2D02G262200	-1.00987	0.000630773	0.00345352	Down	AT5G17370		Transducin/WD40 repeat-like superfamily protein	LOC_Os07g01730	WD-40 repeat family protein
TraesCS2A02G227000	-1.01055	0.000375891	0.00225638	Down	AT5G51220		ubiquinol-cytochrome C chaperone family protein	LOC_Os07g30790	ubiquinol-cytochrome C chaperone family protein
TraesCS5A02G241100	-1.0107	5.64616e-05	0.000474542	Down	AT2G21630		Sec23/Sec24 protein transport family protein	LOC_Os08g36994	protein transport protein
TraesCS1D02G210800	-1.01087	0.00682683	0.0242516	Down	AT4G11410		NAD(P)-binding Rossmann-fold superfamily protein	LOC_Os10g40020	oxidoreductase
TraesCS1D02G363900	-1.01096	0.0136883	0.0429311	Down	AT3G47590		alpha/beta-Hydrolases superfamily protein	LOC_Os05g46210	OsPOP10 - Putative Prolyl Oligopeptidase homologue
TraesCS6D02G174500	-1.01109	0.00757051	0.0263869	Down	AT1G35680	RPL21	50S ribosomal protein L21%2C chloroplastic	LOC_Os02g15900	50S ribosomal protein L21
TraesCS3B02G434800	-1.0114	0.00996666	0.0331334	Down				LOC_Os07g49050	expressed protein
TraesCS3A02G133300	-1.01155	9.08302e-05	0.000700969	Down	AT2G45270	GCP1	Probable tRNA N6-adenosine threonylcarbamoyltransferase%2C mitochondrial	LOC_Os12g29990	O-sialoglycoprotein endopeptidase
TraesCS4B02G243200	-1.01191	0.00114914	0.00564681	Down	AT5G18100	CSD3	Superoxide dismutase	LOC_Os03g11960	copper/zinc superoxide dismutase
TraesCS1B02G266200	-1.01204	0.00637881	0.0229431	Down	AT1G10740		alpha/beta-Hydrolases superfamily protein	LOC_Os05g33820	lipase
TraesCS3A02G151200	-1.01249	0.00623441	0.0225134	Down	AT4G23630	RTNLB1	Reticulon-like protein B1	LOC_Os01g12650	reticulon domain containing protein
TraesCS1B02G381900	-1.01287	0.000574028	0.00319565	Down	AT3G51730		saposin B domain-containing protein	LOC_Os05g26954	saposin-like type B
TraesCS6B02G248500	-1.01302	0.00545344	0.0201715	Down	AT2G24590	RSZ22A	Serine/arginine-rich splicing factor RSZ22A	LOC_Os02g39720	splicing factor
TraesCS5A02G003800	-1.01342	0.00108043	0.00536763	Down	AT1G74790	HIPL1	HIPL1 protein	LOC_Os12g44230	expressed protein
TraesCS1A02G176700	-1.01343	8.68224e-06	0.000100968	Down	AT1G76880		Duplicated homeodomain-like superfamily protein	LOC_Os10g37240	expressed protein
TraesCS3B02G419200	-1.01351	2.20131e-05	0.000217869	Down	AT1G33470		RNA-binding (RRM/RBD/RNP motifs) family protein	LOC_Os01g65550	RNA recognition motif containing protein
TraesCS2D02G178300	-1.01352	0.00074459	0.00395975	Down	AT1G70600	RPL27AC	60S ribosomal protein L27a-3	LOC_Os03g29460	60S ribosomal protein
TraesCS4A02G453500	-1.01356	0.00160527	0.00741624	Down				LOC_Os06g02100	OsFBX181 - F-box domain containing protein
TraesCS2B02G477400	-1.01358	0.0119904	0.0385282	Down	AT4G15080	PAT19	Probable protein S-acyltransferase 19	LOC_Os04g49560	zinc finger family protein
TraesCS4D02G188200	-1.01366	0.0140245	0.0437987	Down	AT4G25800	CBP60D	Calmodulin-binding protein 60 D	LOC_Os03g18960	calmodulin binding protein
TraesCS3D02G393200	-1.01369	0.00209374	0.00920784	Down	AT1G08450	CRT3	Calreticulin-3	LOC_Os01g67054	calreticulin precursor protein
TraesCS6A02G284700	-1.014	0.000187079	0.00126961	Down	AT5G56170	LLG1	LORELEI-LIKE-GPI-ANCHORED PROTEIN 1	LOC_Os02g48980	GPI-anchored protein
TraesCS7A02G284300	-1.01426	0.00109345	0.00541726	Down	AT1G15860		Domain of unknown function (DUF298)	LOC_Os08g34070	DCN1
TraesCS4B02G175900	-1.01464	0.0120086	0.0385724	Down	AT5G22340		unknown protein%3B FUNCTIONS IN: molecular_function unknown%3B INVOLVED IN: biological_process unknown%3B LOCATED IN: chloroplast%3B EXPRESSED IN: 22 plant structures%3B EXPRESSED DURING: 13 growth stages%3B Has 58 Blast hits to 58 proteins in 20 species: Archa /.../ Bacteria - 0%3B Metazoa - 0%3B Fungi - 0%3B Plants - 57%3B Viruses - 0%3B Other Eukaryotes - 1 (source: NCBI BLink).	LOC_Os03g20640	expressed protein
TraesCS2A02G374100	-1.01484	0.00751221	0.0262223	Down	AT1G17840	ABCG11	ABC transporter G family member 11	LOC_Os04g44610	white-brown complex homolog protein 11
TraesCS5A02G407800	-1.01494	7.43898e-05	0.000593927	Down	AT1G50010	TUBA4	Tubulin alpha-4 chain	LOC_Os11g14220	tubulin/FtsZ domain containing protein
TraesCS4A02G457900	-1.01546	0.000348311	0.00212017	Down	AT3G46730	RPP13L3	Putative disease resistance RPP13-like protein 3	LOC_Os10g22484	RGH2B
TraesCS2A02G474000	-1.01627	1.15269e-05	0.000128244	Down	AT1G05230	HDG2	Homeobox-leucine zipper protein HDG2	LOC_Os04g53540	homeobox and START domains containing protein
TraesCS5B02G499800	-1.01636	0.014002	0.0437386	Down	AT2G46930	PAE3	Pectin acetylesterase 3	LOC_Os01g21630	pectinacetylesterase domain containing protein
TraesCS6B02G128100	-1.01648	0.0106904	0.0350792	Down	AT1G02970	WEE1	Wee1-like protein kinase	LOC_Os02g04240	wee1-like protein kinase
TraesCS7A02G491200	-1.01685	0.00119207	0.00581826	Down	AT4G03390	SRF3	Protein STRUBBELIG-RECEPTOR FAMILY 3	LOC_Os06g45020	STRUBBELIG-RECEPTOR FAMILY 3 precursor
TraesCS3D02G223500	-1.01713	0.00303649	0.0124922	Down	AT5G14700		NAD(P)-binding Rossmann-fold superfamily protein	LOC_Os01g45200	cinnamoyl-CoA reductase-related
TraesCS6B02G415600	-1.01717	1.19054e-05	0.000131805	Down	AT1G03905	ABCI19	ABC transporter I family member 19	LOC_Os02g56550	ABC transporter
TraesCS1B02G400500	-1.01751	0.00278021	0.0116145	Down	AT3G18180		Glycosyltransferase family 61 protein	LOC_Os06g28124	glycosyltransferase
TraesCS1D02G145100	-1.01818	1.19281e-05	0.000131995	Down	AT1G09590	RPL21A	60S ribosomal protein L21-1	LOC_Os10g32820	60S ribosomal protein L21-2
TraesCS2B02G359400	-1.01834	0.0104897	0.034551	Down	AT3G48360	BT2	BTB/POZ and TAZ domain-containing protein 2	LOC_Os04g40630	BTBZ4 - Bric-a-Brac
TraesCS4A02G200100	-1.01853	0.0103858	0.0342683	Down	AT5G52340	ATEXO70A2	exocyst subunit exo70 family protein A2	LOC_Os11g05880	exo70 exocyst complex subunit
TraesCS6D02G303200	-1.01857	0.000915988	0.00469013	Down	AT5G58070	ATTIL	temperature-induced lipocalin	LOC_Os08g34150	OsTIL-2 Temperature-induced lipocalin-2
TraesCS3D02G267100	-1.01869	0.00222265	0.00967143	Down	AT3G61750		Cytochrome b561 and DOMON domain-containing protein At3g61750	LOC_Os01g48850	auxin-responsive protein
TraesCS2A02G268800	-1.01895	0.00447533	0.0171633	Down	AT5G01410	PDX13	Pyridoxal 5'-phosphate synthase subunit PDX1.3	LOC_Os07g01020	SOR/SNZ family protein
TraesCS4D02G252700	-1.01912	0.0052248	0.0194748	Down	AT3G55400	OVA1	methionyl-tRNA synthetase / methionine--tRNA ligase / MetRS (cpMetRS)	LOC_Os03g11120	methionyl-tRNA synthetase
TraesCS4D02G286700	-1.01925	0.000131018	0.000947796	Down	AT1G14330		Galactose oxidase/kelch repeat superfamily protein	LOC_Os03g07530	OsFBK12 - F-box domain and kelch repeat containing protein
TraesCS3A02G149800	-1.01955	0.000232029	0.00151717	Down	AT3G23610	DSPTP1	Dual specificity protein phosphatase 1	LOC_Os01g29469	dual specificity protein phosphatase
TraesCS2A02G155500	-1.01966	0.00282441	0.0117689	Down	AT1G14000	VIK	VH1-interacting kinase	LOC_Os07g43900	protein kinase domain containing protein
TraesCS2A02G336400	-1.01968	0.0137635	0.0431244	Down	AT2G24960		unknown protein%3B BEST Arabidopsis thaliana protein match is: unknown protein (TAIR:AT4G02210.2)%3B Has 1453 Blast hits to 509 proteins in 26 species: Archae - 0%3B Bacteria - 0%3B Metazoa - 1%3B Fungi - 39%3B Plants - 1363%3B Viruses - 0%3B Other Eukaryotes - 50 /.../e: NCBI BLink).	LOC_Os04g38960	expressed protein
TraesCS4A02G459600	-1.01978	0.000777011	0.00410269	Down
TraesCS3A02G334800	-1.02022	0.000514648	0.00292261	Down	AT4G37510		Ribonuclease III family protein	LOC_Os01g59510	chloroplast ribonuclease III domain protein
TraesCS5A02G169800	-1.02037	0.0110762	0.0361027	Down	AT1G13570		F-box/FBD/LRR-repeat protein At1g13570	LOC_Os12g31340	OsFBD15 - F-box and FBD domain containing protein
TraesCS5D02G470400	-1.02047	5.23758e-07	9.9248e-06	Down	AT5G05170	CESA3	Cellulose synthase A catalytic subunit 3	LOC_Os03g59340	CESA2 - cellulose synthase
TraesCS7A02G461800	-1.02245	0.00425202	0.0164561	Down	AT1G30460	CPSF30	30-kDa cleavage and polyadenylation specificity factor 30	LOC_Os06g46400	ATCPSF30/CPSF30
TraesCS7D02G403700	-1.02296	1.34043e-05	0.000145276	Down	AT2G01450	MPK17	Mitogen-activated protein kinase 17	LOC_Os01g47530	CGMC_MAPKCMGC_2.6 - CGMC includes CDA
TraesCS1D02G163400	-1.02337	0.00483455	0.0182769	Down	AT1G14610	VALRS	Valine--tRNA ligase	LOC_Os10g36210	valyl-tRNA synthetase
TraesCS3A02G047200	-1.02344	0.00016367	0.00113814	Down	AT1G32500	ABCI7	Protein ABCI7%2C chloroplastic	LOC_Os01g03650	sufB/sufD domain containing protein
TraesCS5A02G455600	-1.02359	0.00046418	0.00268559	Down	AT1G52600		Peptidase S24/S26A/S26B/S26C family protein	LOC_Os06g16260	OsSigP5 - Putative Type I Signal Peptidase homologue; employs a putative Ser/His catalytic dyad
TraesCS3D02G029400	-1.02412	0.00119307	0.00582224	Down	AT5G37870		Putative E3 ubiquitin-protein ligase SINA-like 6	LOC_Os01g55640	seven in absentia protein family protein
TraesCS5D02G132300	-1.02456	0.00110688	0.00547349	Down	AT1G43700	VIP1	Transcription factor VIP1	LOC_Os12g06520	bZIP transcription factor domain containing protein
TraesCS4D02G064500	-1.02463	1.96614e-05	0.000198259	Down	AT5G18650		CHY-type/CTCHY-type/RING-type Zinc finger protein	LOC_Os03g22680	RING finger and CHY zinc finger domain-containing protein 1
TraesCS5A02G496200	-1.0248	0.000201976	0.00135402	Down	AT2G02050		NADH dehydrogenase	LOC_Os03g03770	expressed protein
TraesCS4D02G181900	-1.02501	8.85564e-05	0.000686216	Down	AT4G18440		L-Aspartase-like family protein	LOC_Os03g19930	adenylosuccinate lyase
TraesCS6D02G358800	-1.0254	0.00409417	0.0159455	Down	AT2G39000		Acyl-CoA N-acyltransferases (NAT) superfamily protein	LOC_Os02g56219	acetyltransferase
TraesCS7A02G249400	-1.02555	0.014673	0.0454202	Down	AT5G06740	LECRKS5	Probable L-type lectin-domain containing receptor kinase S.5	LOC_Os08g40280	lectin-like protein kinase
TraesCS6B02G226700	-1.02617	9.65928e-08	2.42431e-06	Down	AT5G55480	GDPDL4	Glycerophosphodiester phosphodiesterase GDPDL4	LOC_Os02g37590	glycerophosphoryl diester phosphodiesterase family protein
TraesCS5B02G418700	-1.02642	0.0105495	0.0347141	Down	AT1G20010	TUBB5	Tubulin beta-5 chain	LOC_Os05g34170	tubulin/FtsZ domain containing protein
TraesCS3D02G131000	-1.02673	0.00320114	0.0130511	Down	AT5G25360		unknown protein%3B BEST Arabidopsis thaliana protein match is: unknown protein (TAIR:AT4G32342.1)%3B Has 1807 Blast hits to 1807 proteins in 277 species: Archae - 0%3B Bacteria - 0%3B Metazoa - 736%3B Fungi - 347%3B Plants - 385%3B Viruses - 0%3B Other Eukaryotes - /.../source: NCBI BLink).	LOC_Os01g07750	expressed protein
TraesCS3A02G507400	-1.02682	0.000989452	0.00499157	Down	AT4G24220	VEP1	3-oxo-Delta(4%2C5)-steroid 5-beta-reductase	LOC_Os03g32170	NAD dependent epimerase/dehydratase family protein
TraesCS4D02G361400	-1.0269	0.0125214	0.0399215	Down	AT4G22540	ORP2A	Oxysterol-binding protein-related protein 2A	LOC_Os10g40590	oxysterol-binding protein
TraesCS3D02G302400	-1.02703	9.39665e-06	0.000107745	Down	AT5G67540		Arabinanase/levansucrase/invertase	LOC_Os01g65720	expressed protein
TraesCS3A02G378200	-1.02704	0.0036357	0.0144649	Down	AT1G76860	LSM3B	Sm-like protein LSM3B	LOC_Os01g64690	LSM domain containing protein
TraesCS3D02G087100	-1.02715	0.00490772	0.0185062	Down	AT1G30480	DRT111	DNA-damage-repair/toleration protein DRT111%2C chloroplastic	LOC_Os01g34190	G-patch domain containing protein
TraesCS6B02G399800	-1.02716	1.95192e-05	0.000196971	Down	AT2G12400		unknown protein%3B FUNCTIONS IN: molecular_function unknown%3B INVOLVED IN: biological_process unknown%3B LOCATED IN: endomembrane system%3B EXPRESSED IN: 25 plant structures%3B EXPRESSED DURING: 13 growth stages%3B BEST Arabidopsis thaliana protein match is: u /.../ protein (TAIR:AT2G25270.1)%3B Has 177 Blast hits to 172 proteins in 23 species: Archae - 0%3B Bacteria - 2%3B Metazoa - 3%3B Fungi …	LOC_Os02g55590	expressed protein
TraesCS5D02G198900	-1.02752	0.00181515	0.00820388	Down	AT5G56900		Zinc finger CCCH domain-containing protein 64	LOC_Os09g19940	cwfJ-like family protein
TraesCS3A02G187000	-1.0281	0.013627	0.0427762	Down	AT5G13500		unknown protein%3B FUNCTIONS IN: molecular_function unknown%3B INVOLVED IN: biological_process unknown%3B LOCATED IN: endomembrane system%3B EXPRESSED IN: 22 plant structures%3B EXPRESSED DURING: 13 growth stages%3B BEST Arabidopsis thaliana protein match is: u /.../ protein (TAIR:AT5G25265.1)%3B Has 1807 Blast hits to 1807 proteins in 277 species: Archae - 0%3B Bacteria - 0%3B Metazoa - 736%3B F…	LOC_Os01g16600	expressed protein
TraesCS7A02G370000	-1.02879	0.000258074	0.00165649	Down	AT1G14360	UTR3	UDP-galactose/UDP-glucose transporter 3	LOC_Os06g39260	solute carrier family 35 member B1
TraesCS6A02G161500	-1.02902	0.000403889	0.00239647	Down	AT3G13235		ubiquitin family protein	LOC_Os02g10510	Ubiquitin family domain containing protein
TraesCS3A02G317800	-1.02902	0.015316	0.0470398	Down	AT5G10530	LECRK91	L-type lectin-domain containing receptor kinase IX.1	LOC_Os01g57100	expressed protein
TraesCS7D02G191600	-1.02944	0.000237213	0.00154606	Down	AT2G01420	PIN4	Auxin efflux carrier component 4	LOC_Os02g50960	auxin efflux carrier component
TraesCS6A02G409100	-1.02954	4.79191e-07	9.23731e-06	Down	AT1G63250	RH48	Probable DEAD-box ATP-dependent RNA helicase 48	LOC_Os02g57980	DEAD/DEAH box helicase
TraesCS4D02G231800	-1.02956	0.000114304	0.000848398	Down	AT1G14690	MAP65-7	65-kDa microtubule-associated protein 7	LOC_Os03g13460	microtubule associated protein
TraesCS4B02G195100	-1.02983	0.00786757	0.0272459	Down	AT3G08920	STR10	Rhodanese-like domain-containing protein 10	LOC_Os03g18020	rhodanese-like family protein
TraesCS6B02G119000	-1.02998	0.0159726	0.0486777	Down	AT4G01990		Pentatricopeptide repeat-containing protein At4g01990%2C mitochondrial	LOC_Os01g19548	pentatricopeptide
TraesCS4D02G249500	-1.03068	0.00633942	0.0228317	Down	AT5G07910		Leucine-rich repeat (LRR) family protein	LOC_Os03g11360	leucine rich repeat containing protein
TraesCS2A02G113000	-1.03097	0.000100857	0.000765881	Down	AT3G05520		F-actin-capping protein subunit alpha	LOC_Os07g23200	F-actin-capping protein subunit alpha
TraesCS7B02G288800	-1.0313	0.000448451	0.00261117	Down	AT2G17990		BEST Arabidopsis thaliana protein match is: kinectin-related (TAIR:AT5G66250.3)%3B Has 7578 Blast hits to 6129 proteins in 783 species: Archae - 220%3B Bacteria - 1045%3B Metazoa - 3605%3B Fungi - 575%3B Plants - 442%3B Viruses - 38%3B Other Eukaryotes - 1653 (so /.../NCBI BLink).	LOC_Os06g50146	calcium-dependent protein kinase CPK1 adapter protein 2
TraesCS5B02G234500	-1.03164	0.000116284	0.000860469	Down	AT1G21920		Histone H3 K4-specific methyltransferase SET7/9 family protein	LOC_Os09g28060	MORN repeat domain containing protein
TraesCS7A02G095300	-1.03168	0.0102633	0.0339444	Down	AT2G02740	WHY3	Single-stranded DNA-binding protein WHY3%2C chloroplastic	LOC_Os06g05350	whirly transcription factor domain containing protein
TraesCS2A02G173800	-1.03205	0.00879791	0.0298705	Down				LOC_Os07g41410	EGG APPARATUS-1
TraesCS1B02G388100	-1.03207	0.0102487	0.0339019	Down	AT5G26710		Glutamyl/glutaminyl-tRNA synthetase%2C class Ic	LOC_Os01g16520	glutamyl-tRNA synthetase
TraesCS4A02G011000	-1.0324	0.000826661	0.00431745	Down	AT1G54150		E3 Ubiquitin ligase family protein	LOC_Os03g08000	expressed protein
TraesCS3D02G273400	-1.03258	0.00285641	0.0118761	Down	AT2G20680	MAN2	Mannan endo-1%2C4-beta-mannosidase 2	LOC_Os01g54300	OsMan02 - Endo-Beta-Mannanase
TraesCS2B02G023400	-1.0327	0.00873984	0.0297085	Down	AT1G19330		unknown protein%3B BEST Arabidopsis thaliana protein match is: unknown protein (TAIR:AT1G75060.1)%3B Has 145 Blast hits to 145 proteins in 43 species: Archae - 0%3B Bacteria - 0%3B Metazoa - 40%3B Fungi - 0%3B Plants - 104%3B Viruses - 0%3B Other Eukaryotes - 1 (so /.../NCBI BLink).	LOC_Os04g08450	expressed protein
TraesCS2A02G428500	-1.03278	6.57676e-05	0.000536803	Down	AT4G28400		Probable protein phosphatase 2C 58	LOC_Os04g52000	protein phosphatase 2C
TraesCS4D02G196700	-1.0328	0.00102922	0.00515406	Down	AT3G52260		RNA pseudouridine synthase 5	LOC_Os03g17920	RNA pseudouridine synthase
TraesCS5A02G136100	-1.03292	0.00652194	0.0233689	Down	AT3G10300	CML49	Probable calcium-binding protein CML49	LOC_Os12g04240	peflin
TraesCS3A02G020300	-1.03335	0.000422994	0.00248963	Down	AT2G01140	FBA3	Probable fructose-bisphosphate aldolase 3%2C chloroplastic	LOC_Os01g02880	fructose-bisphospate aldolase isozyme
TraesCS2B02G416200	-1.03341	0.000148731	0.00105217	Down	AT1G01930		zinc finger protein-related	LOC_Os04g48520	ZOS4-12 - C2H2 zinc finger protein
TraesCS6A02G203500	-1.03352	0.00189799	0.00850971	Down	AT2G22310	UBP4	Ubiquitin carboxyl-terminal hydrolase 4	LOC_Os04g37950	ubiquitin carboxyl-terminal hydrolase domain containing protein
TraesCS5D02G390100	-1.03361	0.0112945	0.0366832	Down	AT5G05920	DHS	Deoxyhypusine synthase	LOC_Os03g52970	deoxyhypusine synthase
TraesCS3A02G301400	-1.03398	0.015069	0.0463923	Down	AT3G52905		Polynucleotidyl transferase%2C ribonuclease H-like superfamily protein	LOC_Os01g55900	holliday junction resolvase
TraesCS4B02G303500	-1.03433	0.00640748	0.023027	Down	AT1G28200	FIP1	GEM-like protein 1	LOC_Os03g08860	GRAM domain containing protein
TraesCS7B02G242800	-1.03433	0.0127112	0.0404108	Down	AT4G29080	IAA27	Auxin-responsive protein IAA27	LOC_Os06g22870	OsIAA21 - Auxin-responsive Aux/IAA gene family member
TraesCS1B02G463100	-1.03499	0.00657899	0.023538	Down	AT4G02610	TRPA1	Tryptophan synthase alpha chain	LOC_Os07g08430	indole-3-glycerol phosphate lyase
TraesCS5D02G239900	-1.03501	0.00529132	0.0196818	Down	AT2G45570	CYP76C2	Cytochrome P450 76C2	LOC_Os09g27500	cytochrome P450
TraesCS4D02G194600	-1.03509	0.000519954	0.0029474	Down	AT5G58590	RANBP1C	Ran-binding protein 1 homolog c	LOC_Os03g18180	ranBP1 domain containing protein
TraesCS2A02G045000	-1.03517	0.010444	0.0344285	Down	AT1G03620		ELMO/CED-12 family protein	LOC_Os04g01150	ELMO/CED-12 family protein
TraesCS5D02G415700	-1.03575	1.75132e-05	0.000180399	Down	AT4G07960	CSLC12	Probable xyloglucan glycosyltransferase 12	LOC_Os05g43530	CSLC7 - cellulose synthase-like family C
TraesCS1A02G144000	-1.03579	0.000140679	0.0010057	Down	AT1G08600	ATRX	Protein CHROMATIN REMODELING 20	LOC_Os10g31970	SNF2 family N-terminal domain containing protein
TraesCS4D02G075000	-1.03603	0.00518627	0.0193616	Down	AT1G67590		Remorin family protein	LOC_Os03g02840	remorin family protein
TraesCS2B02G571800	-1.03604	0.00707662	0.0249695	Down	AT1G04985		unknown protein%3B Has 37 Blast hits to 37 proteins in 11 species: Archae - 0%3B Bacteria - 0%3B Metazoa - 0%3B Fungi - 0%3B Plants - 37%3B Viruses - 0%3B Other Eukaryotes - 0 (source: NCBI BLink).	LOC_Os04g57330	expressed protein
TraesCS4A02G117100	-1.03626	0.00181921	0.00821792	Down	AT4G16120	COBL7	COBRA-like protein 7	LOC_Os03g18910	COBRA-like protein 7 precursor
TraesCS5D02G134700	-1.03636	0.0118526	0.0381809	Down	AT3G11580	ARF32	B3 domain-containing protein At3g11580	LOC_Os12g06080	expressed protein
TraesCS3D02G471700	-1.03649	0.0112212	0.036486	Down	AT5G13470		unknown protein%3B Has 1807 Blast hits to 1807 proteins in 277 species: Archae - 0%3B Bacteria - 0%3B Metazoa - 736%3B Fungi - 347%3B Plants - 385%3B Viruses - 0%3B Other Eukaryotes - 339 (source: NCBI BLink).	LOC_Os01g71262	expressed protein
TraesCS7A02G409100	-1.03666	0.0135315	0.0425367	Down	AT1G15710	TYRAAT2	Arogenate dehydrogenase 2%2C chloroplastic	LOC_Os06g49505	arogenate dehydrogenase 1
TraesCS6D02G197900	-1.03813	0.000368798	0.00222038	Down	AT5G13930	CHS	Chalcone synthase	LOC_Os11g32620	chalcone synthase
TraesCS5B02G438900	-1.03855	0.00575795	0.0210904	Down				LOC_Os10g05220	queuine tRNA-ribosyltransferase
TraesCS2D02G111100	-1.03863	0.000152157	0.00107288	Down	AT3G05560	RPL22B	60S ribosomal protein L22-2	LOC_Os07g47710	60S ribosomal protein L22-2
TraesCS4B02G127500	-1.03908	0.0120478	0.0386787	Down	AT5G55860		WEB family protein At5g55860	LOC_Os12g17310	prefoldin
TraesCS5D02G270200	-1.0391	0.0010705	0.00532725	Down	AT4G12570	UPL5	E3 ubiquitin-protein ligase UPL5	LOC_Os09g31090	HECT-domain domain containing protein
TraesCS7B02G438200	-1.03944	0.000118892	0.000876211	Down	AT5G32440		Ubiquitin system component Cue protein	LOC_Os06g43550	expressed protein
TraesCS3B02G339200	-1.03956	0.0093474	0.031412	Down	AT2G34640	PTAC12	plastid transcriptionally active 12	LOC_Os01g56350	PTAC12
TraesCS2A02G275300	-1.03964	0.0015695	0.00728442	Down				LOC_Os04g28050	expressed protein
TraesCS2B02G503900	-1.04006	0.00291455	0.0120686	Down	AT1G50180		Putative disease resistance protein At1g50180	LOC_Os11g17014	NB-ARC domain containing protein
TraesCS2A02G197300	-1.04015	0.0116187	0.0375466	Down	AT3G13050	2025-10-07	Organic cation/carnitine transporter 7	LOC_Os07g38400	transporter family protein
TraesCS5A02G089400	-1.04018	0.0100296	0.0333044	Down	AT1G47670	AATL1	Lysine histidine transporter-like 8	LOC_Os12g30040	transmembrane amino acid transporter protein
TraesCS5B02G375400	-1.04031	0.00096515	0.0048932	Down	AT3G44150		unknown protein%3B FUNCTIONS IN: molecular_function unknown%3B INVOLVED IN: biological_process unknown%3B LOCATED IN: plasma membrane%3B EXPRESSED IN: cultured cell%3B BEST Arabidopsis thaliana protein match is: unknown protein (TAIR:AT3G11800.1)%3B Has 76 Blas /.../ to 75 proteins in 19 species: Archae - 0%3B Bacteria - 0%3B Metazoa - 0%3B Fungi - 0%3B Plants - 74%3B Viruses - 0%3B Other Eukaryo…	LOC_Os03g44560	expp1 protein precursor
TraesCS7A02G331700	-1.04045	0.00344021	0.0138253	Down	AT4G15000	RPL27C	60S ribosomal protein L27-3	LOC_Os02g18380	60S ribosomal protein L27-3
TraesCS6A02G138100	-1.04053	0.00530938	0.0197338	Down	AT1G05170	B3GALT2	Probable beta-1%2C3-galactosyltransferase 2	LOC_Os02g06840	galactosyltransferase
TraesCS2B02G178500	-1.04089	0.00488244	0.0184219	Down	AT3G49990		unknown protein%3B Has 1524 Blast hits to 1298 proteins in 225 species: Archae - 9%3B Bacteria - 84%3B Metazoa - 474%3B Fungi - 184%3B Plants - 98%3B Viruses - 17%3B Other Eukaryotes - 658 (source: NCBI BLink).	LOC_Os07g44050	expressed protein
TraesCS5D02G562100	-1.0415	0.00261055	0.011038	Down	AT1G17850	STR8	Rhodanese-like domain-containing protein 8%2C chloroplastic	LOC_Os03g64350	rhodanese-like domain containing protein
TraesCS7B02G179600	-1.04152	0.000179988	0.00122985	Down	AT2G28150		Domain of unknown function (DUF966)	LOC_Os08g44760	domain of unknown function DUF966 domain containing protein
TraesCS3D02G056300	-1.0419	9.3715e-06	0.000107495	Down	AT5G01180	NPF8.2	Protein NRT1/ PTR FAMILY 8.2	LOC_Os03g51050	peptide transporter PTR2
TraesCS5A02G178100	-1.04216	0.000862747	0.00446775	Down	AT5G33320	PPT1	Phosphoenolpyruvate/phosphate translocator 1%2C chloroplastic	LOC_Os09g12600	phosphate/phosphate translocator
TraesCS3D02G403300	-1.0423	0.0022542	0.0097845	Down	AT1G21460	SWEET1	Bidirectional sugar transporter SWEET1	LOC_Os01g65880	nodulin MtN3 family protein
TraesCS5D02G330400	-1.04231	0.00175115	0.00796748	Down	AT1G75760		ER lumen protein retaining receptor family protein	LOC_Os08g43470	ER lumen protein retaining receptor
TraesCS7A02G097100	-1.04234	0.00903256	0.0305305	Down	AT3G16370	APG	GDSL esterase/lipase APG	LOC_Os06g05550	GDSL-like lipase/acylhydrolase
TraesCS7A02G010500	-1.04254	0.00481487	0.018225	Down	AT5G62390	BAG7	BAG family molecular chaperone regulator 7	LOC_Os06g01500	IQ calmodulin-binding motif family protein
TraesCS6D02G117800	-1.04261	0.00813722	0.0280179	Down				LOC_Os01g71250	expressed protein
[truncated: 19,149 more rows]

## Sheet: 18 HAI
	The information of salt-regulated DEGs at 18HAI.
[truncated: 3,135 more rows]

[truncated: 1 more sheets: Expression pattern]
