# Supplementary material for: Integrated transcriptome profiling identifies novel regulatory hubs mediating salt stress responses during germination and early seedling development in wheat
Source: Research Square preprint supplement (doi:10.21203/rs.3.rs-8546897/v1), 2026-01-22
Supplement: Supplementary file 4 [file 8a31011969f32f8958354777.xlsx]

## Sheet: Sheet1
	# DE：differentially expressed between treatment and control.
Gene ID	Category	Number of DE Datasets	Number of DE comparsions	Number of up-regulated comparsion	Number of down-regulated comprisions	Percentage of up-regulated comparisons (%)	Annotation
							The homologous genes and corresponding descriptions in Arabidopsis thaliana			The homologous genes and corresponding descriptions in Oryza sativa
TraesCS5D02G310500	cDEG	16	43	41	2	95.3488	AT3G03080		Zinc-binding dehydrogenase family protein	LOC_Os12g12590	NADP-dependent oxidoreductase
TraesCS1B02G394700	cDEG	15	41	39	2	95.122	AT3G18280		Bifunctional inhibitor/lipid-transfer protein/seed storage 2S albumin superfamily protein	LOC_Os05g47730	LTPL153 - Protease inhibitor/seed storage/LTP family protein precursor
TraesCS3A02G217900	cDEG	16	40	37	3	92.5	AT1G15520	ABCG40	ABC transporter G family member 40	LOC_Os12g32820	pleiotropic drug resistance protein 3
TraesCS3B02G248400	cDEG	16	40	37	3	92.5	AT1G15520	ABCG40	ABC transporter G family member 40	LOC_Os12g32820	pleiotropic drug resistance protein 3
TraesCS3D02G061900	cDEG	15	40	34	6	85	AT2G30770	CYP71A13	cytochrome P450%2C family 71%2C subfamily A%2C polypeptide 13	LOC_Os08g01510	cytochrome P450
TraesCS4D02G264500	cDEG	15	40	36	4	90	AT4G33680	DAP	LL-diaminopimelate aminotransferase%2C chloroplastic	LOC_Os03g09910	aminotransferase
TraesCS2A02G204900	cDEG	16	40	0	40	0	AT1G79360	2025-10-02	Organic cation/carnitine transporter 2	LOC_Os07g37510	organic cation transporter-related
TraesCS2B02G232400	cDEG	17	40	0	40	0	AT1G79360	2025-10-02	Organic cation/carnitine transporter 2	LOC_Os07g37510	organic cation transporter-related
TraesCS6D02G333000	cDEG	15	40	33	7	82.5
TraesCS3D02G357200	cDEG	15	39	38	1	97.4359	AT2G39800	P5CSA	Delta-1-pyrroline-5-carboxylate synthase A	LOC_Os01g62900	amino acid kinase
TraesCS1D02G184500	cDEG	16	39	28	11	71.7949	AT1G64660	MGL	Methionine gamma-lyase	LOC_Os10g37340	cystathionine gamma-synthase
TraesCS2D02G211100	cDEG	16	39	0	39	0	AT1G79360	2025-10-02	Organic cation/carnitine transporter 2	LOC_Os07g37510	organic cation transporter-related
TraesCS3B02G395900	cDEG	14	38	37	1	97.3684	AT2G39800	P5CSA	Delta-1-pyrroline-5-carboxylate synthase A	LOC_Os01g62900	amino acid kinase
TraesCS2B02G535400	cDEG	15	38	34	4	89.4737	AT4G21585	ENDO4	Endonuclease 4	LOC_Os04g55850	nuclease PA3
TraesCS1D02G296500	cDEG	15	38	32	6	84.2105	AT5G01300		PEBP (phosphatidylethanolamine-binding protein) family protein	LOC_Os05g39250	phosphatidylethanolamine-binding protein
TraesCS7D02G199900	cDEG	15	38	37	1	97.3684	AT1G24180	IAR4	Pyruvate dehydrogenase E1 component subunit alpha-2%2C mitochondrial	LOC_Os06g13720	dehydrogenase E1 component domain containing protein
TraesCS2D02G031000	cDEG	16	38	30	8	78.9474	AT1G22360	UGT85A2	UDP-glycosyltransferase 85A2	LOC_Os02g36830	cytokinin-O-glucosyltransferase 2
TraesCS6B02G383500	cDEG	15	38	34	4	89.4737				LOC_Os11g26790	dehydrin
TraesCS7D02G536900	cDEG	15	37	29	8	78.3784	AT4G16770		2-oxoglutarate (2OG) and Fe(II)-dependent oxygenase superfamily protein	LOC_Os10g37899	transposon protein
TraesCS3A02G508600	cDEG	17	37	33	4	89.1892	AT4G24220	VEP1	3-oxo-Delta(4%2C5)-steroid 5-beta-reductase	LOC_Os03g32170	NAD dependent epimerase/dehydratase family protein
TraesCS1A02G374400	cDEG	16	37	36	1	97.2973	AT3G18280		Bifunctional inhibitor/lipid-transfer protein/seed storage 2S albumin superfamily protein	LOC_Os05g47730	LTPL153 - Protease inhibitor/seed storage/LTP family protein precursor
TraesCS3A02G363700	cDEG	15	37	35	2	94.5946	AT2G39800	P5CSA	Delta-1-pyrroline-5-carboxylate synthase A	LOC_Os01g62900	amino acid kinase
TraesCS3D02G039300	cDEG	17	37	34	3	91.8919	AT1G03220		Eukaryotic aspartyl protease family protein	LOC_Os01g71080	xylanase inhibitor
TraesCS3B02G584700	cDEG	15	37	35	2	94.5946	AT3G04720	HEL	Hevein-like preproprotein	LOC_Os11g37950	WIP3 - Wound-induced protein precursor
TraesCS6D02G222600	cDEG	15	37	33	4	89.1892	AT2G46680	ATHB-7	Homeobox-leucine zipper protein ATHB-7	LOC_Os02g43330	homeobox associated leucine zipper
TraesCS1D02G369300	cDEG	16	37	34	3	91.8919	AT3G15670		Late embryogenesis abundant protein (LEA) family protein	LOC_Os05g46480	late embryogenesis abundant protein
TraesCS4D02G206600	cDEG	15	37	34	3	91.8919	AT5G42020	MED37F	Mediator of RNA polymerase II transcription subunit 37f	LOC_Os11g47760	DnaK family protein
TraesCS3D02G238000	cDEG	16	37	35	2	94.5946	AT1G07430	AIP1	Protein phosphatase 2C 3	LOC_Os01g46760	protein phosphatase 2C
TraesCS7A02G238900	cDEG	16	37	36	1	97.2973	AT1G24180	IAR4	Pyruvate dehydrogenase E1 component subunit alpha-2%2C mitochondrial	LOC_Os06g13720	dehydrogenase E1 component domain containing protein
TraesCS3A02G217400	cDEG	17	37	36	1	97.2973	AT5G63350		unknown protein%3B BEST Arabidopsis thaliana protein match is: unknown protein (TAIR:AT3G48510.1)%3B Has 103 Blast hits to 102 proteins in 13 species: Archae - 0%3B Bacteria - 0%3B Metazoa - 2%3B Fungi - 0%3B Plants - 101%3B Viruses - 0%3B Other Eukaryotes - 0 (sou /.../CBI BLink).	LOC_Os12g13910	expressed protein
TraesCS3D02G219400	cDEG	17	37	35	2	94.5946	AT5G63350		unknown protein%3B BEST Arabidopsis thaliana protein match is: unknown protein (TAIR:AT3G48510.1)%3B Has 103 Blast hits to 102 proteins in 13 species: Archae - 0%3B Bacteria - 0%3B Metazoa - 2%3B Fungi - 0%3B Plants - 101%3B Viruses - 0%3B Other Eukaryotes - 0 (sou /.../CBI BLink).	LOC_Os12g13910	expressed protein
TraesCS1A02G257200	cDEG	15	36	32	4	88.8889	AT5G40010	AATP1	AAA-ATPase 1	LOC_Os12g44210	ATPase
TraesCS5D02G492300	cDEG	15	36	35	1	97.2222	AT1G01750	ADF10	Actin-depolymerizing factor 10	LOC_Os03g60580	actin-depolymerizing factor
TraesCS4A02G263200	cDEG	17	36	33	3	91.6667	AT1G73480		alpha/beta-Hydrolases superfamily protein	LOC_Os03g51010	hydrolase
TraesCS3A02G061600	cDEG	15	36	30	6	83.3333	AT2G30770	CYP71A13	cytochrome P450%2C family 71%2C subfamily A%2C polypeptide 13	LOC_Os08g01510	cytochrome P450
TraesCS1D02G237100	cDEG	15	36	34	2	94.4444	AT1G12920	ERF1-2	Eukaryotic peptide chain release factor subunit 1-2	LOC_Os01g71270	eukaryotic peptide chain release factor subunit 1-1
TraesCS6B02G284300	cDEG	16	36	32	4	88.8889	AT2G46680	ATHB-7	Homeobox-leucine zipper protein ATHB-7	LOC_Os02g43330	homeobox associated leucine zipper
TraesCS7A02G106000	cDEG	16	36	31	5	86.1111	AT1G31490		HXXXD-type acyl-transferase family protein	LOC_Os06g05790	transferase family domain containing protein
TraesCS7D02G428800	cDEG	15	36	29	7	80.5556	AT5G06760	LEA4-5	Late Embryogenesis Abundant 4-5	LOC_Os08g23870	late embryogenesis abundant group 1
TraesCS7D02G026300	cDEG	16	36	35	1	97.2222	AT1G32560		Late embryogenesis abundant protein%2C group 1 protein	LOC_Os06g02040	late embryogenesis abundant group 1
TraesCS4A02G043800	cDEG	16	36	31	5	86.1111	AT4G33680	DAP	LL-diaminopimelate aminotransferase%2C chloroplastic	LOC_Os03g09910	aminotransferase
TraesCS5B02G015500	cDEG	14	36	29	7	80.5556	AT4G11650	OSM34	Osmotin-like protein OSM34	LOC_Os12g43490	thaumatin
TraesCS1B02G304800	cDEG	14	36	32	4	88.8889	AT5G01300		PEBP (phosphatidylethanolamine-binding protein) family protein	LOC_Os05g39250	phosphatidylethanolamine-binding protein
TraesCS3A02G237800	cDEG	16	36	33	3	91.6667	AT2G29380	HAI3	Probable protein phosphatase 2C 24	LOC_Os01g46760	protein phosphatase 2C
TraesCS2D02G000300	cDEG	15	36	35	1	97.2222	AT5G51760	AHG1	Probable protein phosphatase 2C 75	LOC_Os05g38290	protein phosphatase 2C
TraesCS2D02G047500	cDEG	17	36	31	5	86.1111	AT2G41380		S-adenosyl-L-methionine-dependent methyltransferases superfamily protein	LOC_Os01g20206	methyltransferase
TraesCS5D02G288900	cDEG	13	36	30	6	83.3333	AT5G43580		Serine protease inhibitor%2C potato inhibitor I-type family protein	LOC_Os12g25090	expressed protein
TraesCS5B02G148300	cDEG	14	36	32	4	88.8889	AT1G05675	UGT74E1	UDP-glycosyltransferase 74E1	LOC_Os04g12970	UDP-glucoronosyl/UDP-glucosyl transferase
TraesCS1A02G175500	cDEG	15	36	31	5	86.1111				LOC_Os10g36180	expressed protein
TraesCS1B02G276700	cDEG	14	36	27	9	75				LOC_Os01g04050	BBTI12 - Bowman-Birk type bran trypsin inhibitor precursor
TraesCS4B02G064400	cDEG	15	36	33	3	91.6667				LOC_Os03g52380	PIII5 - Proteinase inhibitor II family protein precursor
TraesCS7A02G371600	cDEG	15	36	32	4	88.8889				LOC_Os10g28080	glycosyl hydrolase
TraesCS5D02G241000	cDEG	15	35	30	5	85.7143	AT1G05010	ACO4	1-aminocyclopropane-1-carboxylate oxidase 4	LOC_Os09g27750	1-aminocyclopropane-1-carboxylate oxidase 1
TraesCS4B02G071500	cDEG	15	35	21	14	60	AT5G09300	T5E8_100	2-oxoisovalerate dehydrogenase subunit alpha 2%2C mitochondrial	LOC_Os12g08260	dehydrogenase E1 component domain containing protein
TraesCS4D02G283600	cDEG	15	35	25	10	71.4286	AT3G11680	ALMT8	Aluminum-activated malate transporter 8	LOC_Os04g34010	aluminum-activated malate transporter
TraesCS2A02G297100	cDEG	15	35	35	0	100	AT5G05960		Bifunctional inhibitor/lipid-transfer protein/seed storage 2S albumin superfamily protein	LOC_Os04g33920	LTPL102 - Protease inhibitor/seed storage/LTP family protein precursor
TraesCS2D02G295000	cDEG	15	35	34	1	97.1429	AT5G05960		Bifunctional inhibitor/lipid-transfer protein/seed storage 2S albumin superfamily protein	LOC_Os04g33920	LTPL102 - Protease inhibitor/seed storage/LTP family protein precursor
TraesCS2B02G359600	cDEG	16	35	7	28	20	AT3G48360	BT2	BTB/POZ and TAZ domain-containing protein 2	LOC_Os04g40630	BTBZ4 - Bric-a-Brac
TraesCS3B02G515100	cDEG	17	35	24	11	68.5714	AT1G03230		Eukaryotic aspartyl protease family protein	LOC_Os01g71090	xylanase inhibitor
TraesCS3D02G523200	cDEG	14	35	35	0	100	AT1G65960	GAD2	Glutamate decarboxylase 2	LOC_Os04g37460	glutamate decarboxylase
TraesCS1D02G094700	cDEG	17	35	32	3	91.4286	AT3G62760	GSTF13	Glutathione S-transferase F13	LOC_Os01g27210	glutathione S-transferase
TraesCS1D02G191100	cDEG	17	35	30	5	85.7143	AT1G10370	GSTU17	Glutathione S-transferase U17	LOC_Os10g38740	glutathione S-transferase
TraesCS2D02G257100	cDEG	16	35	34	1	97.1429	AT4G21620		glycine-rich protein	LOC_Os07g03180	GCRP3 - Glycine and cysteine rich family protein precursor
TraesCS6A02G240400	cDEG	15	35	31	4	88.5714	AT2G46680	ATHB-7	Homeobox-leucine zipper protein ATHB-7	LOC_Os02g43330	homeobox associated leucine zipper
TraesCS1A02G364000	cDEG	14	35	33	2	94.2857	AT1G52690		Late embryogenesis abundant protein (LEA) family protein	LOC_Os05g46480	late embryogenesis abundant protein
TraesCS6A02G385000	cDEG	16	35	4	31	11.4286	AT3G47580		Leucine-rich repeat protein kinase family protein	LOC_Os11g29790	receptor kinase
TraesCS4B02G264500	cDEG	13	35	32	3	91.4286	AT4G33680	DAP	LL-diaminopimelate aminotransferase%2C chloroplastic	LOC_Os03g09910	aminotransferase
TraesCS1B02G199600	cDEG	14	35	28	7	80	AT1G64660	MGL	Methionine gamma-lyase	LOC_Os10g37340	cystathionine gamma-synthase
TraesCS4B02G097200	cDEG	15	35	33	2	94.2857	AT4G22756	SMO1-2	Methylsterol monooxygenase 1-2	LOC_Os03g01820	fatty acid hydroxylase
TraesCS1A02G295800	cDEG	16	35	30	5	85.7143	AT5G01300		PEBP (phosphatidylethanolamine-binding protein) family protein	LOC_Os05g39250	phosphatidylethanolamine-binding protein
TraesCS3A02G297200	cDEG	16	35	29	6	82.8571	AT4G33420	PER47	Peroxidase 47	LOC_Os07g44499	peroxidase
TraesCS3D02G451500	cDEG	15	35	23	12	65.7143	AT5G06870	PGIP2	Polygalacturonase inhibitor 2	LOC_Os05g01370	polygalacturonase inhibitor precursor
TraesCS7A02G328600	cDEG	15	35	33	2	94.2857	AT4G29820	CFIS1	Pre-mRNA cleavage factor Im 25 kDa subunit 1	LOC_Os08g30820	cleavage and polyadenylation specificity factor subunit 5
TraesCS5D02G188600	cDEG	16	35	34	1	97.1429	AT2G29380	HAI3	Probable protein phosphatase 2C 24	LOC_Os09g15670	protein phosphatase 2C
TraesCS7D02G417600	cDEG	15	35	32	3	91.4286	AT4G31750	WIN2	Probable protein phosphatase 2C 59	LOC_Os06g48300	protein phosphatase 2C
TraesCS1D02G212400	cDEG	16	35	0	35	0	AT5G38710	POX2	Proline dehydrogenase 2%2C mitochondrial	LOC_Os10g40360	proline oxidase
TraesCS5D02G360600	cDEG	16	35	30	5	85.7143	AT1G07750		RmlC-like cupins superfamily protein	LOC_Os09g37976	cupin domain containing protein
TraesCS7B02G412400	cDEG	15	35	35	0	100	AT2G38465		unknown protein%3B FUNCTIONS IN: molecular_function unknown%3B INVOLVED IN: biological_process unknown%3B LOCATED IN: plasma membrane%3B EXPRESSED IN: 21 plant structures%3B EXPRESSED DURING: 11 growth stages%3B Has 16 Blast hits to 16 proteins in 8 species: Ar /.../ 0%3B Bacteria - 0%3B Metazoa - 0%3B Fungi - 0%3B Plants - 16%3B Viruses - 0%3B Other Eukaryotes - 0 (source: NCBI BLink).	LOC_Os06g44190	expressed protein
TraesCS1A02G265800	cDEG	14	35	33	2	94.2857				LOC_Os01g04050	BBTI12 - Bowman-Birk type bran trypsin inhibitor precursor
TraesCS6B02G383800	cDEG	14	35	33	2	94.2857
TraesCS3D02G234400	cDEG	15	34	31	3	91.1765	AT1G15520	ABCG40	ABC transporter G family member 40	LOC_Os07g33780	pleiotropic drug resistance protein 5
TraesCS3A02G260200	cDEG	15	34	26	8	76.4706	AT3G12500	CHI-B	Basic endochitinase B	LOC_Os06g51050	CHIT7 - Chitinase family protein precursor
TraesCS2A02G323000	cDEG	15	34	6	28	17.6471	AT3G48360	BT2	BTB/POZ and TAZ domain-containing protein 2	LOC_Os04g40630	BTBZ4 - Bric-a-Brac
TraesCS2B02G177300	cDEG	17	34	21	13	61.7647	AT2G46960	CYP709B1	cytochrome P450%2C family 709%2C subfamily B%2C polypeptide 1	LOC_Os07g44130	cytochrome P450 72A1
TraesCS7D02G549900	cDEG	15	34	29	5	85.2941	AT3G50970	XERO2	Dehydrin Xero 2	LOC_Os11g26790	dehydrin
TraesCS2A02G507400	cDEG	13	34	30	4	88.2353	AT4G21585	ENDO4	Endonuclease 4	LOC_Os04g55850	nuclease PA3
TraesCS3A02G040800	cDEG	16	34	30	4	88.2353	AT1G03230		Eukaryotic aspartyl protease family protein	LOC_Os01g71080	xylanase inhibitor
TraesCS1B02G248600	cDEG	14	34	33	1	97.0588	AT1G12920	ERF1-2	Eukaryotic peptide chain release factor subunit 1-2	LOC_Os01g71270	eukaryotic peptide chain release factor subunit 1-1
TraesCS7B02G253600	cDEG	14	34	30	4	88.2353	AT3G22200	POP2	Gamma-aminobutyrate transaminase POP2%2C mitochondrial	LOC_Os04g52450	aminotransferase
TraesCS5A02G383800	cDEG	15	34	18	16	52.9412	AT3G22830	HSFA6B	Heat stress transcription factor A-6b	LOC_Os03g53340	HSF-type DNA-binding domain containing protein
TraesCS5D02G393200	cDEG	14	34	15	19	44.1176	AT3G22830	HSFA6B	Heat stress transcription factor A-6b	LOC_Os03g53340	HSF-type DNA-binding domain containing protein
TraesCS3B02G314600	cDEG	15	34	31	3	91.1765	AT3G24520	HSFC1	Heat stress transcription factor C-1	LOC_Os01g53220	HSF-type DNA-binding domain containing protein
TraesCS2A02G389400	cDEG	15	34	33	1	97.0588	AT2G46680	ATHB-7	Homeobox-leucine zipper protein ATHB-7	LOC_Os04g45810	homeobox associated leucine zipper
TraesCS3A02G375500	cDEG	16	34	16	18	47.0588	AT5G58900		Homeodomain-like transcriptional regulator	LOC_Os01g64360	MYB family transcription factor
TraesCS4B02G028000	cDEG	15	34	5	29	14.7059	AT5G62720		Integral membrane HPP family protein	LOC_Os03g48030	integral membrane HPP family protein
TraesCS1A02G181000	cDEG	16	34	26	8	76.4706	AT1G64660	MGL	Methionine gamma-lyase	LOC_Os10g37340	cystathionine gamma-synthase
TraesCS7D02G491200	cDEG	14	34	30	4	88.2353	AT4G37060	PLP5	Patatin-like protein 5	LOC_Os08g37180	patatin
TraesCS1D02G188900	cDEG	15	34	32	2	94.1176	AT5G62150		peptidoglycan-binding LysM domain-containing protein	LOC_Os10g38040	lysM domain containing protein
TraesCS5B02G059800	cDEG	16	34	30	4	88.2353	AT1G47480	CXE2	Probable carboxylesterase 2	LOC_Os02g35940	gibberellin receptor GID1L2
TraesCS3D02G158600	cDEG	15	34	26	8	76.4706	AT1G01470	LEA14	Probable desiccation-related protein LEA14	LOC_Os01g12580	late embryogenesis abundant protein
TraesCS5B02G182000	cDEG	15	34	34	0	100	AT2G29380	HAI3	Probable protein phosphatase 2C 24	LOC_Os09g15670	protein phosphatase 2C
TraesCS7A02G423900	cDEG	16	34	29	5	85.2941	AT4G31750	WIN2	Probable protein phosphatase 2C 59	LOC_Os06g48300	protein phosphatase 2C
TraesCS2A02G000400	cDEG	15	34	34	0	100	AT5G51760	AHG1	Probable protein phosphatase 2C 75	LOC_Os05g38290	protein phosphatase 2C
TraesCS3B02G266200	cDEG	15	34	31	3	91.1765	AT5G59220	HAI1	Probable protein phosphatase 2C 78	LOC_Os01g46760	protein phosphatase 2C
TraesCS4D02G210900	cDEG	15	34	28	6	82.3529	AT1G07430	AIP1	Protein phosphatase 2C 3	LOC_Os03g16170	protein phosphatase 2C
TraesCS1B02G242700	cDEG	16	34	30	4	88.2353	AT1G72310	ATL3	RING-H2 finger protein ATL3	LOC_Os05g29710	RING-H2 finger protein
TraesCS5A02G281700	cDEG	14	34	30	4	88.2353	AT5G43580		Serine protease inhibitor%2C potato inhibitor I-type family protein	LOC_Os12g25090	expressed protein
TraesCS5B02G475000	cDEG	15	34	30	4	88.2353	AT5G65550	UGT91B1	UDP-glycosyltransferase 91B1	LOC_Os10g03320	UDP-glucoronosyl and UDP-glucosyl transferase domain containing protein
TraesCS1A02G265700	cDEG	14	34	27	7	79.4118				LOC_Os01g04050	BBTI12 - Bowman-Birk type bran trypsin inhibitor precursor
TraesCS4B02G064300	cDEG	14	34	33	1	97.0588				LOC_Os03g52380	PIII5 - Proteinase inhibitor II family protein precursor
TraesCS6B02G383600	cDEG	14	34	34	0	100
TraesCS6D02G332900	cDEG	14	34	29	5	85.2941
TraesCS7B02G262400	cDEG	15	34	26	8	76.4706
TraesCS5A02G234300	cDEG	13	33	22	11	66.6667	AT1G05010	ACO4	1-aminocyclopropane-1-carboxylate oxidase 4	LOC_Os09g27820	1-aminocyclopropane-1-carboxylate oxidase protein
TraesCS3B02G290300	cDEG	16	33	27	6	81.8182	AT2G47000	ABCB4	ABC transporter B family member 4	LOC_Os01g50160	MDR-like ABC transporter
TraesCS7D02G386600	cDEG	14	33	21	12	63.6364	AT1G15520	ABCG40	ABC transporter G family member 40	LOC_Os01g42410	pleiotropic drug resistance protein
TraesCS6A02G077000	cDEG	16	33	29	4	87.8788	AT5G24090	CHIB1	Acidic endochitinase	LOC_Os06g25010	glycosyl hydrolase
TraesCS5B02G491800	cDEG	15	33	31	2	93.9394	AT5G59880	ADF3	Actin-depolymerizing factor 3	LOC_Os03g60580	actin-depolymerizing factor
TraesCS5A02G153900	cDEG	15	33	20	13	60.6061	AT3G47340	ASN1	Asparagine synthetase	LOC_Os06g15420	asparagine synthetase
TraesCS5D02G159100	cDEG	14	33	23	10	69.697	AT3G47340	ASN1	Asparagine synthetase	LOC_Os06g15420	asparagine synthetase
TraesCS4D02G042200	cDEG	15	33	30	3	90.9091	AT2G02850	ARPN	Basic blue protein	LOC_Os03g50160	plastocyanin-like domain containing protein
TraesCS1D02G342100	cDEG	15	33	30	3	90.9091	AT1G74310	CLPB1	Chaperone protein ClpB1	LOC_Os05g44340	heat shock protein 101
TraesCS3D02G061500	cDEG	15	33	29	4	87.8788	AT2G30750	CYP71A12	cytochrome P450%2C family 71%2C subfamily A%2C polypeptide 12	LOC_Os08g01510	cytochrome P450
TraesCS1A02G235000	cDEG	13	33	33	0	100	AT3G26618	ERF1-3	Eukaryotic peptide chain release factor subunit 1-3	LOC_Os01g71270	eukaryotic peptide chain release factor subunit 1-1
TraesCS1A02G424100	cDEG	14	33	32	1	96.9697	AT4G20820		FAD-binding Berberine family protein	LOC_Os06g35550	retrotransposon protein
TraesCS7A02G354000	cDEG	13	33	25	8	75.7576	AT4G20860		FAD-binding Berberine family protein	LOC_Os06g35650	reticuline oxidase-like protein precursor
TraesCS3A02G246600	cDEG	13	33	2	31	6.06061	AT5G03170	FLA11	Fasciclin-like arabinogalactan protein 11	LOC_Os01g47780	fasciclin domain containing protein
TraesCS5D02G503400	cDEG	15	33	23	10	69.697	AT5G13200		GEM-like protein 5	LOC_Os12g29400	GRAM domain containing protein
TraesCS3D02G524700	cDEG	13	33	32	1	96.9697	AT3G04720	HEL	Hevein-like preproprotein	LOC_Os11g37950	WIP3 - Wound-induced protein precursor
TraesCS7D02G100300	cDEG	15	33	31	2	93.9394	AT1G31490		HXXXD-type acyl-transferase family protein	LOC_Os06g05790	transferase family domain containing protein
TraesCS1A02G406300	cDEG	13	33	33	0	100	AT4G22220	ISU1	Iron-sulfur cluster assembly protein 1	LOC_Os01g47340	iron-sulfur cluster assembly enzyme ISCU
TraesCS3A02G321000	cDEG	12	33	23	10	69.697	AT1G19715	JAL3	Jacalin-related lectin 3	LOC_Os05g43240	jacalin-like lectin domain containing protein
TraesCS1D02G044300	cDEG	14	33	28	5	84.8485	AT3G09220	LAC7	Laccase-7	LOC_Os12g15920	laccase precursor protein
TraesCS7A02G439200	cDEG	15	33	29	4	87.8788	AT5G06760	LEA4-5	Late Embryogenesis Abundant 4-5	LOC_Os08g23870	late embryogenesis abundant group 1
TraesCS7B02G337800	cDEG	14	33	27	6	81.8182	AT5G06760	LEA4-5	Late Embryogenesis Abundant 4-5	LOC_Os08g23870	late embryogenesis abundant group 1
TraesCS1D02G163800	cDEG	14	33	30	3	90.9091	AT5G52300	LTI65	Low-temperature-induced 65 kDa protein	LOC_Os10g36180	expressed protein
TraesCS3D02G305300	cDEG	16	33	26	7	78.7879	AT4G33420	PER47	Peroxidase 47	LOC_Os07g44499	peroxidase
TraesCS7D02G417800	cDEG	16	33	29	4	87.8788	AT3G28580		P-loop containing nucleoside triphosphate hydrolases superfamily protein	LOC_Os06g48250	ATPase
TraesCS7D02G325500	cDEG	15	33	31	2	93.9394	AT4G29820	CFIS1	Pre-mRNA cleavage factor Im 25 kDa subunit 1	LOC_Os08g30820	cleavage and polyadenylation specificity factor subunit 5
TraesCS2A02G510400	cDEG	14	33	12	21	36.3636	AT3G16150		Probable isoaspartyl peptidase/L-asparaginase 2	LOC_Os04g55710	transposon protein
TraesCS2A02G510700	cDEG	14	33	13	20	39.3939	AT3G16150		Probable isoaspartyl peptidase/L-asparaginase 2	LOC_Os04g55710	transposon protein
TraesCS2D02G264400	cDEG	12	33	32	1	96.9697	AT4G27270		Probable NAD(P)H dehydrogenase (quinone) FQR1-like 1	LOC_Os05g42190	NADPH-dependent FMN reductase domain containing protein
TraesCS3B02G356500	cDEG	14	33	33	0	100	AT1G60420		Probable nucleoredoxin 1	LOC_Os01g58194	protein disulfide isomerase
TraesCS6B02G211900	cDEG	14	33	28	5	84.8485	AT3G01270		Probable pectate lyase 7	LOC_Os06g38510	pectate lyase precursor
TraesCS5A02G183600	cDEG	16	33	30	3	90.9091	AT2G29380	HAI3	Probable protein phosphatase 2C 24	LOC_Os09g15670	protein phosphatase 2C
TraesCS6A02G222200	cDEG	14	33	24	9	72.7273	AT5G60680		Protein of unknown function%2C DUF584	LOC_Os02g41840	DUF584 domain containing protein
TraesCS1A02G228500	cDEG	15	33	28	5	84.8485	AT1G53820	ATL60	RING-H2 finger protein ATL60	LOC_Os05g29676	RING-H2 finger protein
TraesCS4D02G169800	cDEG	14	33	33	0	100	AT4G02280	SUS3	Sucrose synthase 3	LOC_Os03g22120	sucrose synthase
TraesCS4D02G243100	cDEG	15	33	29	4	87.8788	AT5G26340	STP13	Sugar transport protein 13	LOC_Os03g11900	transporter family protein
TraesCS3A02G183800	cDEG	14	33	12	21	36.3636	AT5G47560	TDT	Tonoplast dicarboxylate transporter	LOC_Os09g31130	citrate transporter
TraesCS5B02G384500	cDEG	15	33	19	14	57.5758	AT5G43650	BHLH92	Transcription factor bHLH92	LOC_Os03g53020	helix-loop-helix DNA-binding domain containing protein
TraesCS7A02G387000	cDEG	15	33	30	3	90.9091	AT2G20340	ELI5	Tyrosine decarboxylase 1	LOC_Os08g04540	decarboxylase
TraesCS5B02G436300	cDEG	15	33	30	3	90.9091	AT2G15480	UGT73B5	UDP-glycosyltransferase 73B5	LOC_Os01g41430	UDP-glucoronosyl and UDP-glucosyl transferase
TraesCS2B02G286900	cDEG	16	33	30	3	90.9091	AT5G59080		unknown protein%3B FUNCTIONS IN: molecular_function unknown%3B INVOLVED IN: response to oxidative stress%3B LOCATED IN: chloroplast%3B EXPRESSED IN: 18 plant structures%3B EXPRESSED DURING: 9 growth stages%3B BEST Arabidopsis thaliana protein match is: unknown /.../n (TAIR:AT3G46880.1)%3B Has 1807 Blast hits to 1807 proteins in 277 species: Archae - 0%3B Bacteria - 0%3B Metazoa - 736%3B Fungi - 3…	LOC_Os05g38040	expressed protein
TraesCS3A02G528900	cDEG	15	33	31	2	93.9394	AT4G32940	GAMMA-VPE	Vacuolar-processing enzyme gamma-isozyme	LOC_Os01g37910	vacuolar-processing enzyme precursor
TraesCS3D02G534200	cDEG	14	33	29	4	87.8788	AT4G32940	GAMMA-VPE	Vacuolar-processing enzyme gamma-isozyme	LOC_Os01g37910	vacuolar-processing enzyme precursor
TraesCSU02G075000	cDEG	15	33	17	16	51.5152	AT5G59820	ZAT12	Zinc finger protein ZAT12	LOC_Os03g60560	ZOS3-21 - C2H2 zinc finger protein
TraesCS1A02G084600	cDEG	13	33	28	5	84.8485
TraesCS2B02G490400	cDEG	14	33	30	3	90.9091				LOC_Os02g33380	pectinesterase inhibitor domain containing protein
TraesCS4A02G116400	cDEG	15	33	28	5	84.8485				LOC_Os03g18850	pathogenesis-related Bet v I family protein
TraesCS5A02G424700	cDEG	15	33	32	1	96.9697				LOC_Os11g26760	dehydrin
TraesCS5B02G426800	cDEG	14	33	30	3	90.9091				LOC_Os11g26780	dehydrin
TraesCS6D02G333600	cDEG	16	33	30	3	90.9091
TraesCS7D02G357400	cDEG	17	33	25	8	75.7576
TraesCS7A02G443600	cDEG	14	32	26	6	81.25	AT1G06620		1-aminocyclopropane-1-carboxylate oxidase homolog 1	LOC_Os08g30210	1-aminocyclopropane-1-carboxylate oxidase homolog 1
TraesCS4A02G114400	cDEG	16	32	0	32	0	AT2G38310	PYL4	Abscisic acid receptor PYL4	LOC_Os03g18600	cyclase/dehydrase family protein
TraesCS4B02G189800	cDEG	16	32	0	32	0	AT2G38310	PYL4	Abscisic acid receptor PYL4	LOC_Os03g18600	cyclase/dehydrase family protein
TraesCS4D02G191200	cDEG	16	32	0	32	0	AT2G38310	PYL4	Abscisic acid receptor PYL4	LOC_Os03g18600	cyclase/dehydrase family protein
TraesCS6D02G026400	cDEG	15	32	11	21	34.375	AT1G62660	BFRUCT3	Acid beta-fructofuranosidase 3%2C vacuolar	LOC_Os02g01590	glycosyl hydrolases
TraesCSU02G026500	cDEG	15	32	29	3	90.625	AT5G24090	CHIB1	Acidic endochitinase	LOC_Os06g25010	glycosyl hydrolase
TraesCS5A02G292000	cDEG	15	32	28	4	87.5	AT1G54570		Acyltransferase-like protein At1g54570%2C chloroplastic	LOC_Os09g33530	expressed protein
TraesCS7D02G523800	cDEG	13	32	28	4	87.5	AT1G08065	ACA5	Alpha carbonic anhydrase 5	LOC_Os08g36630	bifunctional monodehydroascorbate reductase and carbonic anhydrasenectarin-3 precursor
TraesCS5B02G566400	cDEG	13	32	28	4	87.5	AT1G04560		AWPM-19-like family protein	LOC_Os07g24000	AWPM-19-like membrane family protein
TraesCS5B02G468800	cDEG	15	32	27	5	84.375	AT5G19855		Chaperonin-like RbcX protein	LOC_Os03g59320	expressed protein
TraesCS5D02G413600	cDEG	15	32	29	3	90.625	AT2G15970	COR413PM1	Cold-regulated 413 plasma membrane protein 1	LOC_Os03g55850	cold acclimation protein WCOR413
TraesCS3D02G475800	cDEG	14	32	23	9	71.875	AT2G41510	CKX1	Cytokinin dehydrogenase 1	LOC_Os01g71310	cytokinin dehydrogenase precursor
TraesCS3B02G042700	cDEG	14	32	30	2	93.75	AT5G48430		Eukaryotic aspartyl protease family protein	LOC_Os01g71080	xylanase inhibitor
TraesCS3B02G514800	cDEG	14	32	27	5	84.375	AT1G03230		Eukaryotic aspartyl protease family protein	LOC_Os01g71090	xylanase inhibitor
TraesCS1D02G433600	cDEG	15	32	31	1	96.875	AT5G44390		FAD-binding Berberine family protein	LOC_Os06g35550	retrotransposon protein
TraesCS2B02G059500	cDEG	16	32	7	25	21.875	AT4G31380	FLP1	FPF1-like protein 1	LOC_Os07g47450	flowering promoting factor-like 1
TraesCS4B02G033100	cDEG	13	32	25	7	78.125	AT1G18980		Germin-like protein subfamily T member 2	LOC_Os03g48780	Cupin domain containing protein
TraesCS4D02G031600	cDEG	14	32	29	3	90.625	AT1G18980		Germin-like protein subfamily T member 2	LOC_Os03g48780	Cupin domain containing protein
TraesCS4B02G047400	cDEG	16	32	31	1	96.875	AT1G66200	GLN1-2	Glutamine synthetase cytosolic isozyme 1-2	LOC_Os03g50490	glutamine synthetase
TraesCS3D02G483000	cDEG	15	32	30	2	93.75	AT3G09270	GSTU8	Glutathione S-transferase U8	LOC_Os01g72120	glutathione S-transferase
TraesCS3B02G568300	cDEG	17	32	29	3	90.625	AT3G24520	HSFC1	Heat stress transcription factor C-1	LOC_Os02g13800	HSF-type DNA-binding domain containing protein
TraesCS3A02G517100	cDEG	14	32	31	1	96.875	AT3G04720	HEL	Hevein-like preproprotein	LOC_Os11g37950	WIP3 - Wound-induced protein precursor
TraesCS1D02G414700	cDEG	13	32	32	0	100	AT4G22220	ISU1	Iron-sulfur cluster assembly protein 1	LOC_Os05g49300	iron-sulfur cluster assembly enzyme ISCU
TraesCS1B02G135700	cDEG	12	32	29	3	90.625	AT1G80160		Lactoylglutathione lyase / glyoxalase I family protein	LOC_Os05g07940	glyoxalase family protein
TraesCS4A02G297800	cDEG	13	32	32	0	100	AT2G32090		Lactoylglutathione lyase / glyoxalase I family protein	LOC_Os03g45720	glyoxalase family protein
TraesCS1B02G381200	cDEG	14	32	30	2	93.75	AT3G15670		Late embryogenesis abundant protein (LEA) family protein	LOC_Os05g46480	late embryogenesis abundant protein
TraesCS4A02G098600	cDEG	13	32	32	0	100	AT5G42020	MED37F	Mediator of RNA polymerase II transcription subunit 37f	LOC_Os08g09770	DnaK family protein
TraesCS3B02G177000	cDEG	15	32	30	2	93.75	AT1G79900	BAC2	Mitochondrial arginine transporter BAC2	LOC_Os01g12520	mitochondrial carrier protein
TraesCS5D02G243700	cDEG	15	32	25	7	78.125	AT5G14040	MPT3	Mitochondrial phosphate carrier protein 3%2C mitochondrial	LOC_Os04g37600	phosphate carrier protein
TraesCS1B02G204100	cDEG	12	32	2	30	6.25	AT4G12420	SKU5	Monocopper oxidase-like protein SKU5	LOC_Os10g36390	monocopper oxidase
TraesCS1D02G344900	cDEG	14	32	29	3	90.625	AT4G13180		NAD(P)-binding Rossmann-fold superfamily protein	LOC_Os10g31780	oxidoreductase
TraesCS2A02G315600	cDEG	16	32	29	3	90.625	AT1G59960		NAD(P)-linked oxidoreductase superfamily protein	LOC_Os04g37490	oxidoreductase
TraesCS4B02G184800	cDEG	14	32	30	2	93.75	AT4G16160	OEP162	Outer envelope pore protein 16-2%2C chloroplastic	LOC_Os03g19290	mitochondrial import inner membrane translocase subunit Tim17
TraesCS4D02G186100	cDEG	13	32	31	1	96.875	AT4G16160	OEP162	Outer envelope pore protein 16-2%2C chloroplastic	LOC_Os03g19290	mitochondrial import inner membrane translocase subunit Tim17
TraesCS4A02G401300	cDEG	16	32	20	12	62.5	AT2G37040	PAL1	Phenylalanine ammonia-lyase 1	LOC_Os04g43800	phenylalanine ammonia-lyase
TraesCS3D02G451400	cDEG	15	32	26	6	81.25	AT5G06860	PGIP1	Polygalacturonase inhibitor 1	LOC_Os05g01370	polygalacturonase inhibitor precursor
TraesCS4D02G174700	cDEG	13	32	30	2	93.75	AT3G08590		Probable 2%2C3-bisphosphoglycerate-independent phosphoglycerate mutase 2	LOC_Os01g60190	2
TraesCS2A02G274700	cDEG	16	32	29	3	90.625	AT1G60690		Probable aldo-keto reductase 3	LOC_Os04g26910	oxidoreductase
TraesCS7D02G133500	cDEG	14	32	9	23	28.125	AT5G20250	RFS6	Probable galactinol--sucrose galactosyltransferase 6	LOC_Os06g07600	uncharacterized glycosyltransferase
TraesCS2B02G023600	cDEG	13	32	31	1	96.875	AT5G51760	AHG1	Probable protein phosphatase 2C 75	LOC_Os05g38290	protein phosphatase 2C
TraesCS3D02G288600	cDEG	16	32	20	12	62.5	AT5G19600	SULTR3%3B5	Probable sulfate transporter 3.5	LOC_Os01g52130	sulfate transporter
TraesCS1B02G088900	cDEG	13	32	18	14	56.25	AT2G38470	WRKY33	Probable WRKY transcription factor 33	LOC_Os05g27730	WRKY53
TraesCS1D02G072900	cDEG	13	32	17	15	53.125	AT2G38470	WRKY33	Probable WRKY transcription factor 33	LOC_Os05g27730	WRKY53
TraesCS1B02G223300	cDEG	14	32	1	31	3.125	AT5G38710	POX2	Proline dehydrogenase 2%2C mitochondrial	LOC_Os10g40360	proline oxidase
TraesCS6D02G342800	cDEG	14	32	30	2	93.75	AT1G23070		Protein LAZ1 homolog 2	LOC_Os03g29340	domain of unknown function domain containing protein
TraesCS6D02G212800	cDEG	15	32	26	6	81.25	AT5G03230		Protein of unknown function%2C DUF584	LOC_Os02g41840	DUF584 domain containing protein
TraesCS3B02G153400	cDEG	15	32	31	1	96.875	AT4G19840	PP2A1	Protein PHLOEM PROTEIN 2-LIKE A1	LOC_Os01g06500	PHLOEM 2-LIKE A5
TraesCS3D02G136100	cDEG	15	32	29	3	90.625	AT4G19840	PP2A1	Protein PHLOEM PROTEIN 2-LIKE A1	LOC_Os01g06500	PHLOEM 2-LIKE A5
TraesCS4B02G210100	cDEG	16	32	28	4	87.5	AT1G07430	AIP1	Protein phosphatase 2C 3	LOC_Os03g16170	protein phosphatase 2C
TraesCS2A02G048600	cDEG	16	32	26	6	81.25	AT2G41380		S-adenosyl-L-methionine-dependent methyltransferases superfamily protein	LOC_Os01g20206	methyltransferase
TraesCS2B02G184400	cDEG	15	32	28	4	87.5	AT2G38900		Serine protease inhibitor%2C potato inhibitor I-type family protein	LOC_Os01g42860	inhibitor I family protein
TraesCS2D02G165800	cDEG	13	32	27	5	84.375	AT2G38900		Serine protease inhibitor%2C potato inhibitor I-type family protein	LOC_Os01g42860	inhibitor I family protein
TraesCS7B02G253700	cDEG	14	32	31	1	96.875	AT1G11680	CYP51G1	Sterol 14-demethylase	LOC_Os02g02230	cytochrome P450
TraesCS2D02G073900	cDEG	14	32	30	2	93.75	AT2G45290	TKL-2	Transketolase-2%2C chloroplastic	LOC_Os04g19740	transketolase
TraesCS2A02G438200	cDEG	14	32	23	9	71.875	AT3G22370	AOX1A	Ubiquinol oxidase 1a%2C mitochondrial	LOC_Os04g51160	transposon protein
TraesCS2A02G438300	cDEG	15	32	25	7	78.125	AT3G22370	AOX1A	Ubiquinol oxidase 1a%2C mitochondrial	LOC_Os04g51160	transposon protein
TraesCS7B02G094400	cDEG	14	32	26	6	81.25	AT2G36780	UGT73C3	UDP-glycosyltransferase 73C3	LOC_Os10g09990	cytokinin-O-glucosyltransferase 3
TraesCS7D02G217800	cDEG	15	32	25	7	78.125	AT3G16520	UGT88A1	UDP-glycosyltransferase 88A1	LOC_Os06g18140	UDP-glucoronosyl and UDP-glucosyl transferase domain containing protein
TraesCS6A02G091400	cDEG	14	32	29	3	90.625	AT5G66780		unknown protein%3B Has 1807 Blast hits to 1807 proteins in 277 species: Archae - 0%3B Bacteria - 0%3B Metazoa - 736%3B Fungi - 347%3B Plants - 385%3B Viruses - 0%3B Other Eukaryotes - 339 (source: NCBI BLink).	LOC_Os03g51350	expressed protein
TraesCS5D02G042300	cDEG	13	32	32	0	100	AT3G03341		unknown protein%3B Has 30201 Blast hits to 17322 proteins in 780 species: Archae - 12%3B Bacteria - 1396%3B Metazoa - 17338%3B Fungi - 3422%3B Plants - 5037%3B Viruses - 0%3B Other Eukaryotes - 2996 (source: NCBI BLink).	LOC_Os01g45659	expressed protein
TraesCS1A02G093000	cDEG	14	32	31	1	96.875				LOC_Os05g05930	peripheral-type benzodiazepine receptor
TraesCS3A02G046000	cDEG	14	32	24	8	75				LOC_Os01g03380	BBTI6 - Bowman-Birk type bran trypsin inhibitor precursor
TraesCS3D02G034200	cDEG	13	32	22	10	68.75				LOC_Os01g03380	BBTI6 - Bowman-Birk type bran trypsin inhibitor precursor
TraesCS4A02G250500	cDEG	15	32	28	4	87.5				LOC_Os03g52370	PIII4 - Proteinase inhibitor II family protein precursor
TraesCS4D02G282400	cDEG	13	32	32	0	100				LOC_Os03g07180	embryonic protein DC-8
TraesCS5D02G379200	cDEG	13	32	30	2	93.75
TraesCS6A02G350700	cDEG	12	32	31	1	96.875				LOC_Os11g26750	dehydrin
TraesCS7D02G038000	cDEG	14	32	26	6	81.25
TraesCS5D02G565600	cDEG	14	31	30	1	96.7742	AT5G50600	HSD1	11-beta-hydroxysteroid dehydrogenase 1A	LOC_Os12g27830	dehydrogenase/reductase
TraesCS4B02G335300	cDEG	16	31	22	9	70.9677	AT4G25310		2-oxoglutarate (2OG) and Fe(II)-dependent oxygenase superfamily protein	LOC_Os03g63900	1-aminocyclopropane-1-carboxylate oxidase 2
TraesCS4D02G195700	cDEG	13	31	19	12	61.2903	AT3G11180		2-oxoglutarate (2OG) and Fe(II)-dependent oxygenase superfamily protein	LOC_Os03g18030	leucoanthocyanidin dioxygenase
TraesCS1B02G267700	cDEG	15	31	27	4	87.0968	AT5G40010	AATP1	AAA-ATPase 1	LOC_Os12g44210	ATPase
TraesCS6D02G026500	cDEG	14	31	12	19	38.7097	AT1G62660	BFRUCT3	Acid beta-fructofuranosidase 3%2C vacuolar	LOC_Os02g01590	glycosyl hydrolases
TraesCS5D02G491900	cDEG	13	31	11	20	35.4839	AT5G59880	ADF3	Actin-depolymerizing factor 3	LOC_Os03g60580	actin-depolymerizing factor
TraesCS7D02G211700	cDEG	14	31	30	1	96.7742	AT4G28390	AAC3	ADP%2CATP carrier protein 3%2C mitochondrial	LOC_Os05g23720	mitochondrial carrier protein
TraesCS5B02G210100	cDEG	12	31	28	3	90.3226	AT1G54100	ALDH7B4	Aldehyde dehydrogenase family 7 member B4	LOC_Os09g26880	aldehyde dehydrogenase
TraesCS5D02G218400	cDEG	13	31	28	3	90.3226	AT1G54100	ALDH7B4	Aldehyde dehydrogenase family 7 member B4	LOC_Os09g26880	aldehyde dehydrogenase
TraesCS7B02G243000	cDEG	13	31	4	27	12.9032	AT3G16240	TIP2-1	Aquaporin TIP2-1	LOC_Os06g22960	aquaporin protein
TraesCS1A02G113100	cDEG	12	31	4	27	12.9032	AT2G46330	AGP16	Arabinogalactan peptide 16	LOC_Os05g12580	expressed protein
TraesCS2D02G289900	cDEG	14	31	22	9	70.9677	AT1G08250	ADT6	Arogenate dehydratase/prephenate dehydratase 6%2C chloroplastic	LOC_Os04g33390	prephenate dehydratase domain containing protein
TraesCS4D02G027900	cDEG	15	31	30	1	96.7742	AT5G62670	AHA11	ATPase 11%2C plasma membrane-type	LOC_Os12g44150	plasma membrane ATPase
TraesCS2B02G350500	cDEG	15	31	31	0	100	AT5G47810	PFK2	ATP-dependent 6-phosphofructokinase 2	LOC_Os09g30240	phosphofructokinase
TraesCS5D02G558900	cDEG	13	31	30	1	96.7742	AT1G04560		AWPM-19-like family protein	LOC_Os07g24000	AWPM-19-like membrane family protein
TraesCS4A02G269400	cDEG	14	31	30	1	96.7742	AT2G02850	ARPN	Basic blue protein	LOC_Os03g50160	plastocyanin-like domain containing protein
TraesCS3B02G293200	cDEG	15	31	24	7	77.4194	AT3G12500	CHI-B	Basic endochitinase B	LOC_Os06g51050	CHIT7 - Chitinase family protein precursor
TraesCS1A02G215500	cDEG	15	31	13	18	41.9355	AT4G17090	BAM3	Beta-amylase 3%2C chloroplastic	LOC_Os10g41550	beta-amylase
TraesCS5A02G295200	cDEG	14	31	28	3	90.3226	AT1G02850	BGLU11	Beta-glucosidase 11	LOC_Os09g33680	Os9bglu31 - beta-glucosidase
TraesCS4D02G051200	cDEG	14	31	27	4	87.0968	AT2G45180		Bifunctional inhibitor/lipid-transfer protein/seed storage 2S albumin superfamily protein	LOC_Os03g50960	LTPL118 - Protease inhibitor/seed storage/LTP family protein precursor
TraesCS5D02G269400	cDEG	14	31	15	16	48.3871	AT2G44310		Calcium-binding EF-hand family protein	LOC_Os09g31000	EF hand family protein
TraesCS1B02G352400	cDEG	15	31	27	4	87.0968	AT1G74310	CLPB1	Chaperone protein ClpB1	LOC_Os05g44340	heat shock protein 101
TraesCS4D02G206200	cDEG	14	31	4	27	12.9032	AT5G48540	CRRSP55	Cysteine-rich repeat secretory protein 55	LOC_Os03g16950	cysteine-rich repeat secretory protein 55 precursor
TraesCS1B02G465000	cDEG	15	31	28	3	90.3226	AT3G50930	BCS1	cytochrome BC1 synthesis	LOC_Os05g51130	mitochondrial chaperone BCS1
TraesCS3D02G537800	cDEG	13	31	28	3	90.3226	AT3G14690	CYP72A15	Cytochrome P450 72A15	LOC_Os01g43740	cytochrome P450 72A1
TraesCS7B02G168800	cDEG	16	31	6	25	19.3548	AT3G61880	CYP78A9	Cytochrome P450 78A9	LOC_Os08g43390	cytochrome P450
TraesCS6A02G350300	cDEG	15	31	25	6	80.6452	AT3G50970	XERO2	Dehydrin Xero 2	LOC_Os11g26790	dehydrin
TraesCS5B02G118200	cDEG	15	31	27	4	87.0968	AT5G50080	ERF110	Ethylene-responsive transcription factor ERF110	LOC_Os11g06770	ethylene-responsive transcription factor ERF110
TraesCS3B02G272700	cDEG	14	31	1	30	3.22581	AT5G03170	FLA11	Fasciclin-like arabinogalactan protein 11	LOC_Os01g47780	fasciclin domain containing protein
TraesCS7D02G259900	cDEG	14	31	16	15	51.6129	AT3G26010		F-box protein At3g26010	LOC_Os08g41750	OsFBX303 - F-box domain containing protein
TraesCS3D02G371900	cDEG	15	31	26	5	83.871	AT1G03970	GBF4	G-box-binding factor 4	LOC_Os01g64730	bZIP transcription factor domain containing protein
TraesCS3A02G025400	cDEG	14	31	23	8	74.1935	AT3G26430		GDSL esterase/lipase At3g26430	LOC_Os07g39740	GDSL-like lipase/acylhydrolase
TraesCS5B02G502200	cDEG	11	31	20	11	64.5161	AT5G13200		GEM-like protein 5	LOC_Os12g29400	GRAM domain containing protein
TraesCS4B02G377100	cDEG	13	31	19	12	61.2903	AT5G39110	GLP6	Germin-like protein subfamily 1 member 14	LOC_Os08g08990	Cupin domain containing protein
TraesCS5B02G048500	cDEG	14	31	29	2	93.5484	AT5G39180		Germin-like protein subfamily 1 member 19	LOC_Os08g08980	cupin domain containing protein
TraesCS6D02G127800	cDEG	15	31	25	6	80.6452	AT1G10370	GSTU17	Glutathione S-transferase U17	LOC_Os10g38670	glutathione S-transferase
TraesCS3B02G234100	cDEG	15	31	29	2	93.5484	AT1G10360	GSTU18	Glutathione S-transferase U18	LOC_Os01g49710	glutathione S-transferase
TraesCS1A02G234600	cDEG	16	31	12	19	38.7097	AT4G16260		Glycosyl hydrolase superfamily protein	LOC_Os05g31140	glycosyl hydrolases family 17
TraesCS3A02G483000	cDEG	14	31	25	6	80.6452	AT4G16260		Glycosyl hydrolase superfamily protein	LOC_Os01g71670	glycosyl hydrolases family 17
TraesCS4B02G363900	cDEG	16	31	2	29	6.45161	AT4G29260		HAD superfamily%2C subfamily IIIB acid phosphatase	LOC_Os05g10330	HAD superfamily phosphatase
TraesCS4D02G358900	cDEG	16	31	30	1	96.7742	AT3G24520	HSFC1	Heat stress transcription factor C-1	LOC_Os02g13800	HSF-type DNA-binding domain containing protein
TraesCS2D02G063000	cDEG	15	31	24	7	77.4194	AT5G66110	HIPP27	Heavy metal transport/detoxification superfamily protein	LOC_Os04g17100	heavy metal-associated domain containing protein
TraesCS4A02G040600	cDEG	13	31	24	7	77.4194	AT4G36740	ATHB-40	Homeobox-leucine zipper protein ATHB-40	LOC_Os03g10210	homeobox domain containing protein
TraesCS2D02G387300	cDEG	14	31	28	3	90.3226	AT2G46680	ATHB-7	Homeobox-leucine zipper protein ATHB-7	LOC_Os04g45810	homeobox associated leucine zipper
TraesCS5A02G063100	cDEG	14	31	27	4	87.0968	AT5G50720	HVA22E	HVA22-like protein e	LOC_Os11g30500	HVA22
TraesCS5B02G069300	cDEG	14	31	26	5	83.871	AT5G50720	HVA22E	HVA22-like protein e	LOC_Os11g30500	HVA22
TraesCS7A02G357800	cDEG	15	31	6	25	19.3548	AT1G14520	MIOX1	Inositol oxygenase 1	LOC_Os06g36560	inositol oxygenase
TraesCS1A02G043900	cDEG	14	31	30	1	96.7742	AT3G09220	LAC7	Laccase-7	LOC_Os12g15920	laccase precursor protein
TraesCS4D02G014300	cDEG	14	31	30	1	96.7742	AT2G32090		Lactoylglutathione lyase / glyoxalase I family protein	LOC_Os03g45720	glyoxalase family protein
TraesCS6A02G344000	cDEG	13	31	26	5	83.871	AT4G33150	LKR/SDH	lysine-ketoglutarate reductase/saccharopine dehydrogenase bifunctional enzyme	LOC_Os02g54254	saccharopine dehydrogenase
TraesCS4D02G358100	cDEG	14	31	4	27	12.9032	AT1G02170	AMC1	Metacaspase-1	LOC_Os03g27120	ICE-like protease p20 domain containing protein
TraesCS3B02G496200	cDEG	14	31	29	2	93.5484	AT2G23620	MES1	Methylesterase 1	LOC_Os01g70860	esterase
TraesCS4D02G093600	cDEG	15	31	26	5	83.871	AT4G22756	SMO1-2	Methylsterol monooxygenase 1-2	LOC_Os03g01820	fatty acid hydroxylase
TraesCS7B02G417700	cDEG	13	31	25	6	80.6452	AT4G11650	OSM34	Osmotin-like protein OSM34	LOC_Os12g43490	thaumatin
TraesCS1B02G195500	cDEG	14	31	29	2	93.5484	AT5G62150		peptidoglycan-binding LysM domain-containing protein	LOC_Os10g38040	lysM domain containing protein
TraesCS4A02G196400	cDEG	14	31	22	9	70.9677	AT5G05340	PER52	Peroxidase 52	LOC_Os11g02130	peroxidase precursor
TraesCS4A02G259300	cDEG	14	31	27	4	87.0968	AT5G39050	PMAT1	Phenolic glucoside malonyltransferase 1	LOC_Os02g28340	transferase family protein
TraesCS4A02G259400	cDEG	15	31	25	6	80.6452	AT5G39050	PMAT1	Phenolic glucoside malonyltransferase 1	LOC_Os02g28340	transferase family protein
TraesCS5A02G356300	cDEG	15	31	29	2	93.5484	AT5G17230	PSY1	Phytoene synthase%2C chloroplastic	LOC_Os09g38320	phytoene synthase
TraesCS1A02G125900	cDEG	13	31	27	4	87.0968	AT4G32870		Polyketide cyclase/dehydrase and lipid transport superfamily protein	LOC_Os05g11250	lachrymatory factor synthase
TraesCS1A02G238800	cDEG	14	31	19	12	61.2903	AT1G24620	CML25	Probable calcium-binding protein CML25	LOC_Os05g31620	OsCML15 - Calmodulin-related calcium sensor protein
TraesCS2B02G394500	cDEG	13	31	27	4	87.0968	AT5G41000	YSL4	Probable metal-nicotianamine transporter YSL4	LOC_Os04g45860	transposon protein
TraesCS7B02G326200	cDEG	13	31	29	2	93.5484	AT4G31750	WIN2	Probable protein phosphatase 2C 59	LOC_Os06g48300	protein phosphatase 2C
TraesCS3B02G323500	cDEG	15	31	22	9	70.9677	AT5G19600	SULTR3%3B5	Probable sulfate transporter 3.5	LOC_Os01g52130	sulfate transporter
TraesCS5D02G232900	cDEG	13	31	23	8	74.1935	AT1G80840	WRKY40	Probable WRKY transcription factor 40	LOC_Os09g25060	WRKY76
TraesCS3A02G460900	cDEG	13	31	2	29	6.45161	AT3G26700		Protein kinase superfamily protein	LOC_Os01g70970	protein kinase
TraesCS5B02G208400	cDEG	12	31	28	3	90.3226	AT2G05940		Protein kinase superfamily protein	LOC_Os09g27010	tyrosine protein kinase domain containing protein
TraesCS6B02G258900	cDEG	12	31	25	6	80.6452	AT5G03230		Protein of unknown function%2C DUF584	LOC_Os02g41840	DUF584 domain containing protein
TraesCS7D02G340400	cDEG	16	31	30	1	96.7742	AT3G22490		Seed maturation protein	LOC_Os06g23350	late embryogenesis abundant protein D-34
TraesCS3D02G519600	cDEG	13	31	29	2	93.5484	AT1G43710	SDC	Serine decarboxylase	LOC_Os02g33710	decarboxylase
TraesCS2B02G521800	cDEG	12	31	30	1	96.7742	AT1G78290	SRK2C	Serine/threonine-protein kinase SRK2C	LOC_Os03g27280	CAMK_CAMK_like.19 - CAMK includes calcium/calmodulin depedent protein kinases
TraesCS5D02G012300	cDEG	14	31	25	6	80.6452	AT1G11680	CYP51G1	Sterol 14-demethylase	LOC_Os05g34325	cytochrome P450 51
TraesCS3A02G252900	cDEG	14	31	18	13	58.0645	AT4G16430	BHLH3	Transcription factor bHLH3	LOC_Os01g50940	helix-loop-helix DNA-binding domain containing protein
TraesCS4B02G072200	cDEG	14	31	23	8	74.1935	AT4G34380		Transducin/WD40 repeat-like superfamily protein	LOC_Os03g42710	WD-40 repeat family protein
TraesCS2D02G436200	cDEG	14	31	20	11	64.5161	AT3G22370	AOX1A	Ubiquinol oxidase 1a%2C mitochondrial	LOC_Os04g51160	transposon protein
TraesCS6B02G327200	cDEG	14	31	28	3	90.3226	AT2G32300	UCC1	uclacyanin 1	LOC_Os09g29390	plastocyanin-like domain containing protein
TraesCS2D02G281700	cDEG	14	31	27	4	87.0968	AT1G27990		unknown protein%3B BEST Arabidopsis thaliana protein match is: unknown protein (TAIR:AT5G52420.1)%3B Has 86 Blast hits to 86 proteins in 15 species: Archae - 0%3B Bacteria - 0%3B Metazoa - 0%3B Fungi - 0%3B Plants - 84%3B Viruses - 0%3B Other Eukaryotes - 2 (source /.../ BLink).	LOC_Os04g31710	expressed protein
TraesCS2A02G255600	cDEG	15	31	20	11	64.5161	AT5G59080		unknown protein%3B FUNCTIONS IN: molecular_function unknown%3B INVOLVED IN: response to oxidative stress%3B LOCATED IN: chloroplast%3B EXPRESSED IN: 18 plant structures%3B EXPRESSED DURING: 9 growth stages%3B BEST Arabidopsis thaliana protein match is: unknown /.../n (TAIR:AT3G46880.1)%3B Has 1807 Blast hits to 1807 proteins in 277 species: Archae - 0%3B Bacteria - 0%3B Metazoa - 736%3B Fungi - 3…	LOC_Os05g38040	expressed protein
TraesCS1A02G145800	cDEG	13	31	24	7	77.4194	AT1G07040		unknown protein%3B INVOLVED IN: biological_process unknown%3B LOCATED IN: chloroplast%3B EXPRESSED IN: 24 plant structures%3B EXPRESSED DURING: 14 growth stages%3B BEST Arabidopsis thaliana protein match is: unknown protein (TAIR:AT1G27030.1)%3B Has 540 Blast h /.../ 538 proteins in 187 species: Archae - 0%3B Bacteria - 333%3B Metazoa - 0%3B Fungi - 0%3B Plants - 67%3B Viruses - 0%3B Other Eukary…	LOC_Os10g32680	expressed protein
TraesCS5D02G369400	cDEG	13	31	25	6	80.6452	AT4G30650		UPF0057 membrane protein At4g30650	LOC_Os09g38560	OsRCI2-11 - Hydrophobic protein OSR8
TraesCS3D02G428400	cDEG	16	31	3	28	9.67742				LOC_Os01g69960	expressed protein
TraesCS3D02G474500	cDEG	15	31	27	4	87.0968
TraesCS3D02G517300	cDEG	13	31	3	28	9.67742				LOC_Os01g73250	abscisic stress-ripening
TraesCS5A02G159900	cDEG	13	31	29	2	93.5484
TraesCS6D02G197600	cDEG	14	31	27	4	87.0968				LOC_Os08g23870	late embryogenesis abundant group 1
TraesCS6D02G333100	cDEG	14	31	28	3	90.3226
TraesCS7A02G162600	cDEG	13	31	27	4	87.0968				LOC_Os03g18850	pathogenesis-related Bet v I family protein
TraesCS7A02G463300	cDEG	14	31	30	1	96.7742				LOC_Os04g01560	expressed protein
TraesCS7B02G262300	cDEG	17	31	24	7	77.4194
TraesCS5D02G241100	cDEG	14	30	25	5	83.3333	AT1G05010	ACO4	1-aminocyclopropane-1-carboxylate oxidase 4	LOC_Os09g27820	1-aminocyclopropane-1-carboxylate oxidase protein
TraesCS2A02G394900	cDEG	14	30	22	8	73.3333	AT4G10500		2-oxoglutarate (2OG) and Fe(II)-dependent oxygenase superfamily protein	LOC_Os04g49210	naringenin
TraesCS4D02G002800	cDEG	16	30	27	3	90	AT2G36690		2-oxoglutarate (2OG) and Fe(II)-dependent oxygenase superfamily protein	LOC_Os08g44590	gibberellin 20 oxidase 2
TraesCS7D02G279500	cDEG	15	30	24	6	80	AT2G36690		2-oxoglutarate (2OG) and Fe(II)-dependent oxygenase superfamily protein	LOC_Os08g44590	gibberellin 20 oxidase 2
TraesCS4D02G051300	cDEG	14	30	5	25	16.6667	AT2G01910	MAP65-6	65-kDa microtubule-associated protein 6	LOC_Os03g50970	retrotransposon protein
TraesCS3A02G258000	cDEG	16	30	26	4	86.6667	AT3G28380	ABCB17	ABC transporter B family member 17	LOC_Os01g50100	ABC transporter
TraesCS5B02G449500	cDEG	14	30	22	8	73.3333	AT1G66950	ABCG39	ABC transporter G family member 39	LOC_Os02g21340	ABC-2 type transporter family protein
TraesCS6B02G031600	cDEG	14	30	11	19	36.6667	AT1G62660	BFRUCT3	Acid beta-fructofuranosidase 3%2C vacuolar	LOC_Os02g01590	glycosyl hydrolases
TraesCS6B02G031700	cDEG	14	30	11	19	36.6667	AT1G62660	BFRUCT3	Acid beta-fructofuranosidase 3%2C vacuolar	LOC_Os02g01590	glycosyl hydrolases
TraesCS5A02G169500	cDEG	13	30	24	6	80	AT5G48220		Aldolase-type TIM barrel family protein	LOC_Os09g08130	indole-3-glycerol phosphate synthase
TraesCS7A02G537600	cDEG	13	30	25	5	83.3333	AT1G08080	ACA7	Alpha carbonic anhydrase 7	LOC_Os08g36630	bifunctional monodehydroascorbate reductase and carbonic anhydrasenectarin-3 precursor
TraesCS3A02G219200	cDEG	13	30	25	5	83.3333	AT3G15650		alpha/beta-Hydrolases superfamily protein	LOC_Os01g42690	OsPOP2 - Putative Prolyl Oligopeptidase homologue
TraesCS3D02G233300	cDEG	13	30	23	7	76.6667	AT3G15650		alpha/beta-Hydrolases superfamily protein	LOC_Os01g42690	OsPOP2 - Putative Prolyl Oligopeptidase homologue
TraesCS6A02G254100	cDEG	15	30	25	5	83.3333	AT2G42005		Amino acid transporter ANTL1	LOC_Os02g44980	transmembrane amino acid transporter protein
TraesCS4B02G310900	cDEG	12	30	1	29	3.33333	AT2G36830	TIP1-1	Aquaporin TIP1-1	LOC_Os03g05290	aquaporin protein
TraesCS2D02G331200	cDEG	15	30	30	0	100	AT5G47810	PFK2	ATP-dependent 6-phosphofructokinase 2	LOC_Os09g30240	phosphofructokinase
TraesCS3D02G260500	cDEG	13	30	26	4	86.6667	AT3G12500	CHI-B	Basic endochitinase B	LOC_Os06g51060	CHIT8 - Chitinase family protein precursor
TraesCS5D02G408200	cDEG	12	30	28	2	93.3333	AT3G12500	CHI-B	Basic endochitinase B	LOC_Os10g39680	CHIT14 - Chitinase family protein precursor
TraesCS2B02G311900	cDEG	14	30	15	15	50	AT3G52600	CWINV2	Beta-fructofuranosidase%2C insoluble isoenzyme CWINV2	LOC_Os04g33740	glycosyl hydrolases
TraesCS2A02G488900	cDEG	14	30	9	21	30	AT1G55120	CWINV3	Beta-fructofuranosidase%2C insoluble isoenzyme CWINV3	LOC_Os09g08072	glycosyl hydrolases
TraesCS5A02G535100	cDEG	15	30	4	26	13.3333	AT2G45180		Bifunctional inhibitor/lipid-transfer protein/seed storage 2S albumin superfamily protein	LOC_Os04g46830	LTPL122 - Protease inhibitor/seed storage/LTP family protein precursor
TraesCS2D02G339900	cDEG	14	30	8	22	26.6667	AT3G48360	BT2	BTB/POZ and TAZ domain-containing protein 2	LOC_Os04g40630	BTBZ4 - Bric-a-Brac
TraesCS7D02G412800	cDEG	13	30	19	11	63.3333	AT4G30110	HMA2	Cadmium/zinc-transporting ATPase HMA2	LOC_Os07g12900	cadmium/zinc-transporting ATPase
TraesCS1A02G099100	cDEG	12	30	3	27	10	AT5G16910	CSLD2	Cellulose synthase-like protein D2	LOC_Os07g36630	CSLF8 - cellulose synthase-like family F; beta1
TraesCS1D02G107100	cDEG	14	30	2	28	6.66667	AT5G16910	CSLD2	Cellulose synthase-like protein D2	LOC_Os07g36630	CSLF8 - cellulose synthase-like family F; beta1
TraesCS3B02G110100	cDEG	13	30	27	3	90	AT4G23990	CSLG3	Cellulose synthase-like protein G3	LOC_Os09g30120	CSLE1 - cellulose synthase-like family E
TraesCS5A02G403600	cDEG	14	30	28	2	93.3333	AT2G15970	COR413PM1	Cold-regulated 413 plasma membrane protein 1	LOC_Os03g55850	cold acclimation protein WCOR413
TraesCS4D02G270900	cDEG	14	30	19	11	63.3333	AT3G27200		Cupredoxin superfamily protein	LOC_Os09g39940	plastocyanin-like domain containing protein
TraesCS2A02G216600	cDEG	14	30	26	4	86.6667	AT4G23180	CRK10	Cysteine-rich receptor-like protein kinase 10	LOC_Os07g35280	TKL_IRAK_DUF26-lc.1 - DUF26 kinases have homology to DUF26 containing loci
TraesCS7B02G469000	cDEG	14	30	25	5	83.3333	AT5G24960	CYP71A14	Cytochrome P450 71A14	LOC_Os06g43384	cytochrome P450
TraesCS3D02G061700	cDEG	13	30	23	7	76.6667	AT3G26300	CYP71B34	Cytochrome P450 71B34	LOC_Os08g01450	cytochrome P450
TraesCS1D02G004600	cDEG	14	30	26	4	86.6667	AT3G14690	CYP72A15	Cytochrome P450 72A15	LOC_Os01g43700	cytochrome P450 72A1
TraesCS5A02G397900	cDEG	13	30	26	4	86.6667	AT4G37360	CYP81D2	cytochrome P450%2C family 81%2C subfamily D%2C polypeptide 2	LOC_Os03g55240	cytochrome P450
TraesCSU02G031600	cDEG	14	30	25	5	83.3333	AT1G12740	CYP87A2	cytochrome P450%2C family 87%2C subfamily A%2C polypeptide 2	LOC_Os04g48200	cytochrome P450
TraesCS1A02G235100	cDEG	15	30	26	4	86.6667	AT5G07920	DGK1	Diacylglycerol kinase 1	LOC_Os12g38780	diacylglycerol kinase 1
TraesCS3D02G368000	cDEG	15	30	11	19	36.6667	AT5G04760		Duplicated homeodomain-like superfamily protein	LOC_Os01g64360	MYB family transcription factor
TraesCS7B02G355200	cDEG	14	30	28	2	93.3333	AT3G20570	ENODL9	early nodulin-like protein 9	LOC_Os06g46740	early nodulin 20 precursor
TraesCS5A02G112600	cDEG	14	30	23	7	76.6667	AT5G64750	ABR1	Ethylene-responsive transcription factor ABR1	LOC_Os11g06770	ethylene-responsive transcription factor ERF110
TraesCS1A02G300200	cDEG	15	30	15	15	50	AT1G69530	EXPA1	Expansin-A1	LOC_Os05g39990	expansin precursor
TraesCS1B02G456900	cDEG	13	30	28	2	93.3333	AT5G44410		FAD-binding Berberine family protein	LOC_Os06g35550	retrotransposon protein
TraesCS7D02G368700	cDEG	15	30	26	4	86.6667	AT5G44410		FAD-binding Berberine family protein	LOC_Os06g35650	reticuline oxidase-like protein precursor
TraesCS4B02G377200	cDEG	14	30	20	10	66.6667	AT5G39110	GLP6	Germin-like protein subfamily 1 member 14	LOC_Os08g08990	Cupin domain containing protein
TraesCS4B02G377400	cDEG	12	30	23	7	76.6667	AT5G39110	GLP6	Germin-like protein subfamily 1 member 14	LOC_Os08g08990	Cupin domain containing protein
TraesCS3B02G141800	cDEG	14	30	4	26	13.3333	AT1G15550	GA3OX1	Gibberellin 3-beta-dioxygenase 1	LOC_Os01g08220	gibberellin 3-beta-dioxygenase 2-2
TraesCS2A02G045400	cDEG	14	30	27	3	90	AT3G62760	GSTF13	Glutathione S-transferase F13	LOC_Os01g27360	glutathione S-transferase
TraesCS3B02G536100	cDEG	16	30	26	4	86.6667	AT3G09270	GSTU8	Glutathione S-transferase U8	LOC_Os01g72120	glutathione S-transferase
TraesCS2A02G266900	cDEG	15	30	30	0	100	AT4G21620		glycine-rich protein	LOC_Os07g03180	GCRP3 - Glycine and cysteine rich family protein precursor
TraesCS2A02G064900	cDEG	15	30	27	3	90	AT5G66110	HIPP27	Heavy metal transport/detoxification superfamily protein	LOC_Os04g17100	heavy metal-associated domain containing protein
TraesCS3B02G379100	cDEG	14	30	23	7	76.6667	AT5G05365		Heavy metal transport/detoxification superfamily protein	LOC_Os01g61070	heavy metal-associated domain containing protein
TraesCS2B02G407600	cDEG	12	30	29	1	96.6667	AT2G46680	ATHB-7	Homeobox-leucine zipper protein ATHB-7	LOC_Os04g45810	homeobox associated leucine zipper
TraesCS1B02G393100	cDEG	13	30	30	0	100	AT5G06710	HAT14	Homeobox-leucine zipper protein HAT14	LOC_Os02g35770	homeobox associated leucine zipper
TraesCS7D02G315000	cDEG	15	30	26	4	86.6667	AT3G62160		HXXXD-type acyl-transferase family protein	LOC_Os01g42870	transferase family protein
TraesCS7B02G269900	cDEG	14	30	7	23	23.3333	AT1G14520	MIOX1	Inositol oxygenase 1	LOC_Os06g36560	inositol oxygenase
TraesCS1B02G380700	cDEG	15	30	28	2	93.3333	AT1G73040	JAL19	Jacalin-related lectin 19	LOC_Os01g51050	jacalin-like lectin domain containing protein
TraesCS1D02G327100	cDEG	15	30	21	9	70	AT1G19715	JAL3	Jacalin-related lectin 3	LOC_Os05g43240	jacalin-like lectin domain containing protein
TraesCS6D02G325100	cDEG	13	30	25	5	83.3333	AT4G33150	LKR/SDH	lysine-ketoglutarate reductase/saccharopine dehydrogenase bifunctional enzyme	LOC_Os02g54254	saccharopine dehydrogenase
TraesCS4D02G302500	cDEG	14	30	23	7	76.6667	AT5G65380		MATE efflux family protein	LOC_Os03g08900	MATE efflux family protein
TraesCS4B02G205700	cDEG	14	30	29	1	96.6667	AT5G42020	MED37F	Mediator of RNA polymerase II transcription subunit 37f	LOC_Os03g16880	DnaK family protein
TraesCS5A02G143200	cDEG	15	30	26	4	86.6667	AT3G15510	ATNAC2	NAC domain containing protein 2	LOC_Os11g03300	NAC domain transcription factor
TraesCS5B02G142100	cDEG	13	30	28	2	93.3333	AT3G15510	ATNAC2	NAC domain containing protein 2	LOC_Os11g03300	NAC domain transcription factor
TraesCS2B02G333900	cDEG	13	30	29	1	96.6667	AT1G59960		NAD(P)-linked oxidoreductase superfamily protein	LOC_Os04g37490	oxidoreductase
TraesCS2D02G561400	cDEG	15	30	22	8	73.3333	AT5G36970	NHL25	NDR1/HIN1-like 25	LOC_Os04g58090	harpin-induced protein 1 domain containing protein
TraesCS6D02G020700	cDEG	15	30	10	20	33.3333	AT1G37130	NIA2	Nitrate reductase	LOC_Os08g36480	nitrate reductase
TraesCS2B02G435900	cDEG	14	30	3	27	10	AT5G47240	NUDT8	Nudix hydrolase 8	LOC_Os04g46280	hydrolase
TraesCS1D02G430700	cDEG	15	30	4	26	13.3333	AT2G05790		O-Glycosyl hydrolases family 17 protein	LOC_Os07g35350	glucan endo-1
TraesCS4D02G015600	cDEG	15	30	25	5	83.3333	AT4G11650	OSM34	Osmotin-like protein OSM34	LOC_Os03g46070	thaumatin
TraesCS5A02G017900	cDEG	13	30	25	5	83.3333	AT4G11650	OSM34	Osmotin-like protein OSM34	LOC_Os12g43490	thaumatin
TraesCS2A02G492500	cDEG	13	30	18	12	60	AT5G56550	OXS3	oxidative stress 3	LOC_Os02g13370	expressed protein
TraesCS1A02G187700	cDEG	13	30	28	2	93.3333	AT5G62150		peptidoglycan-binding LysM domain-containing protein	LOC_Os10g38040	lysM domain containing protein
TraesCS2A02G573900	cDEG	13	30	10	20	33.3333	AT1G71695	PER12	Peroxidase 12	LOC_Os04g59150	peroxidase precursor
TraesCS1B02G354900	cDEG	12	30	2	28	6.66667	AT5G58390	PER67	Peroxidase 67	LOC_Os03g25330	peroxidase precursor
TraesCS2B02G385200	cDEG	14	30	28	2	93.3333	AT4G26740	PXG1	Peroxygenase 1	LOC_Os04g43200	caleosin related protein
TraesCS4B02G055400	cDEG	16	30	25	5	83.3333	AT5G39050	PMAT1	Phenolic glucoside malonyltransferase 1	LOC_Os02g28170	transferase family protein
TraesCS4D02G055600	cDEG	13	30	24	6	80	AT5G39050	PMAT1	Phenolic glucoside malonyltransferase 1	LOC_Os02g28340	transferase family protein
TraesCS1D02G039400	cDEG	14	30	19	11	63.3333	AT2G37040	PAL1	Phenylalanine ammonia-lyase 1	LOC_Os04g43800	phenylalanine ammonia-lyase
TraesCS5B02G358800	cDEG	13	30	27	3	90	AT5G17230	PSY1	Phytoene synthase%2C chloroplastic	LOC_Os09g38320	phytoene synthase
TraesCS3D02G159200	cDEG	15	30	28	2	93.3333	AT1G64110		P-loop containing nucleoside triphosphate hydrolases superfamily protein	LOC_Os05g50750	AAA family ATPase
TraesCS6D02G038600	cDEG	15	30	25	5	83.3333	AT3G48690	CXE12	Probable carboxylesterase 12	LOC_Os09g28720	alpha/beta hydrolase fold
TraesCS2A02G143100	cDEG	15	30	25	5	83.3333	AT5G23530	CXE18	Probable carboxylesterase 18	LOC_Os07g44910	gibberellin receptor GID1L2
TraesCS7D02G037700	cDEG	15	30	25	5	83.3333	AT1G35710		Probable leucine-rich repeat receptor-like protein kinase At1g35710	LOC_Os02g34790	receptor-like protein kinase 5 precursor
TraesCS2D02G013300	cDEG	14	30	25	5	83.3333	AT3G47570		Probable LRR receptor-like serine/threonine-protein kinase At3g47570	LOC_Os02g13780	receptor-like protein kinase 2 precursor
TraesCS1A02G228100	cDEG	15	30	27	3	90	AT3G05640		Probable protein phosphatase 2C 34	LOC_Os05g29030	protein phosphatase 2C
TraesCS4A02G106800	cDEG	13	30	5	25	16.6667	AT3G54770	ARP1	Probable RNA-binding protein ARP1	LOC_Os03g17760	RNA recognition motif containing protein
TraesCS1A02G070400	cDEG	13	30	16	14	53.3333	AT2G38470	WRKY33	Probable WRKY transcription factor 33	LOC_Os05g27730	WRKY53
TraesCS1A02G401800	cDEG	15	30	25	5	83.3333	AT1G29860	WRKY71	Probable WRKY transcription factor 71	LOC_Os05g49100	WRKY49
TraesCS2A02G404600	cDEG	14	30	13	17	43.3333	AT2G17220		Protein kinase superfamily protein	LOC_Os04g47620	protein kinase APK1B
TraesCS1B02G267900	cDEG	15	30	21	9	70	AT1G68570	NPF3.1	Protein NRT1/ PTR FAMILY 3.1	LOC_Os05g33960	peptide transporter PTR2
TraesCS2B02G326200	cDEG	13	30	20	10	66.6667	AT1G59740	NPF4.3	Protein NRT1/ PTR FAMILY 4.3	LOC_Os04g36040	peptide transporter PTR2
TraesCS1D02G341700	cDEG	14	30	9	21	30	AT2G20670		Protein of unknown function (DUF506)	LOC_Os05g44300	plant-specific domain TIGR01615 family protein
TraesCS4A02G094300	cDEG	16	30	23	7	76.6667	AT1G07430	AIP1	Protein phosphatase 2C 3	LOC_Os03g16170	protein phosphatase 2C
TraesCS2A02G433500	cDEG	14	30	23	7	76.6667	AT5G57540	XTH13	Putative xyloglucan endotransglucosylase/hydrolase protein 13	LOC_Os04g51520	glycosyl hydrolases family 16
TraesCS7B02G019600	cDEG	12	30	11	19	36.6667	AT4G35770	STR15	Rhodanese-like domain-containing protein 15%2C chloroplastic	LOC_Os06g50930	rhodanese-like domain containing protein
TraesCS6D02G320200	cDEG	13	30	26	4	86.6667	AT2G02990	RNS1	Ribonuclease 1	LOC_Os08g33710	ribonuclease T2 family domain containing protein
TraesCS4A02G237400	cDEG	14	30	1	29	3.33333	AT3G30460		RING/U-box superfamily protein	LOC_Os12g39110	zinc finger
TraesCS1D02G230300	cDEG	14	30	28	2	93.3333	AT1G53820	ATL60	RING-H2 finger protein ATL60	LOC_Os05g29676	RING-H2 finger protein
TraesCS5B02G355800	cDEG	15	30	26	4	86.6667	AT1G07750		RmlC-like cupins superfamily protein	LOC_Os09g37976	cupin domain containing protein
TraesCS3A02G512400	cDEG	12	30	27	3	90	AT1G43710	SDC	Serine decarboxylase	LOC_Os02g33710	decarboxylase
TraesCS2B02G184300	cDEG	14	30	25	5	83.3333	AT2G38900		Serine protease inhibitor%2C potato inhibitor I-type family protein	LOC_Os01g42860	inhibitor I family protein
TraesCS2A02G493800	cDEG	14	30	28	2	93.3333	AT1G78290	SRK2C	Serine/threonine-protein kinase SRK2C	LOC_Os03g27280	CAMK_CAMK_like.19 - CAMK includes calcium/calmodulin depedent protein kinases
TraesCS1D02G089600	cDEG	14	30	27	3	90	AT5G48930	HST	Shikimate O-hydroxycinnamoyltransferase	LOC_Os10g23820	transferase family protein
TraesCS6A02G132700	cDEG	14	30	29	1	96.6667	AT1G15330	PV42A	SNF1-related protein kinase regulatory subunit gamma-like PV42a	LOC_Os02g06410	CBS domain containing membrane protein
TraesCS3A02G138300	cDEG	13	30	19	11	63.3333	AT4G10540		Subtilase family protein	LOC_Os04g03810	OsSub38 - Putative Subtilisin homologue
TraesCS4A02G140000	cDEG	12	30	30	0	100	AT4G02280	SUS3	Sucrose synthase 3	LOC_Os03g22120	sucrose synthase
TraesCS4A02G066200	cDEG	14	30	23	7	76.6667	AT5G26340	STP13	Sugar transport protein 13	LOC_Os03g11900	transporter family protein
TraesCS5D02G390700	cDEG	13	30	17	13	56.6667	AT5G43650	BHLH92	Transcription factor bHLH92	LOC_Os03g53020	helix-loop-helix DNA-binding domain containing protein
TraesCS2B02G459000	cDEG	14	30	17	13	56.6667	AT3G22370	AOX1A	Ubiquinol oxidase 1a%2C mitochondrial	LOC_Os04g51160	transposon protein
TraesCS5B02G197400	cDEG	16	30	25	5	83.3333	AT1G60190	PUB19	U-box domain-containing protein 19	LOC_Os09g21120	armadillo/beta-catenin repeat family protein
TraesCS2D02G055000	cDEG	14	30	28	2	93.3333	AT1G05675	UGT74E1	UDP-glycosyltransferase 74E1	LOC_Os04g12970	UDP-glucoronosyl/UDP-glucosyl transferase
TraesCS5A02G149600	cDEG	13	30	27	3	90	AT1G05675	UGT74E1	UDP-glycosyltransferase 74E1	LOC_Os04g12970	UDP-glucoronosyl/UDP-glucosyl transferase
TraesCS1A02G424000	cDEG	14	30	26	4	86.6667	AT3G16520	UGT88A1	UDP-glycosyltransferase 88A1	LOC_Os01g53350	anthocyanidin 5
TraesCS3B02G247700	cDEG	14	30	29	1	96.6667	AT5G63350		unknown protein%3B BEST Arabidopsis thaliana protein match is: unknown protein (TAIR:AT3G48510.1)%3B Has 103 Blast hits to 102 proteins in 13 species: Archae - 0%3B Bacteria - 0%3B Metazoa - 2%3B Fungi - 0%3B Plants - 101%3B Viruses - 0%3B Other Eukaryotes - 0 (sou /.../CBI BLink).	LOC_Os12g13910	expressed protein
TraesCS3A02G290100	cDEG	15	30	1	29	3.33333	AT5G11500		unknown protein%3B CONTAINS InterPro DOMAIN/s: Protein of unknown function DUF814 (InterPro:IPR008532)%3B Has 1807 Blast hits to 1807 proteins in 277 species: Archae - 0%3B Bacteria - 0%3B Metazoa - 736%3B Fungi - 347%3B Plants - 385%3B Viruses - 0%3B Other Eukaryo /.../339 (source: NCBI BLink).	LOC_Os01g54670	coiled-coil domain-containing protein 25
TraesCS1D02G118000	cDEG	13	30	10	20	33.3333	AT3G15630		unknown protein%3B FUNCTIONS IN: molecular_function unknown%3B INVOLVED IN: biological_process unknown%3B LOCATED IN: chloroplast%3B EXPRESSED IN: 24 plant structures%3B EXPRESSED DURING: 15 growth stages%3B BEST Arabidopsis thaliana protein match is: unknown p /.../ (TAIR:AT1G52720.1)%3B Has 61 Blast hits to 61 proteins in 13 species: Archae - 0%3B Bacteria - 0%3B Metazoa - 0%3B Fungi - 0%3B Pla…	LOC_Os05g08420	expressed protein
TraesCS2D02G302100	cDEG	12	30	30	0	100				LOC_Os08g34500	expressed protein
TraesCS3A02G416800	cDEG	12	30	29	1	96.6667				LOC_Os01g68300	expressed protein
TraesCS3B02G347300	cDEG	13	30	5	25	16.6667
TraesCS5B02G045100	cDEG	15	30	21	9	70
TraesCS5D02G095900	cDEG	12	30	28	2	93.3333
TraesCS6A02G215300	cDEG	12	30	23	7	76.6667				LOC_Os08g23870	late embryogenesis abundant group 1
TraesCS6A02G350500	cDEG	13	30	26	4	86.6667
TraesCS6D02G080300	cDEG	13	30	28	2	93.3333				LOC_Os03g51350	expressed protein
TraesCS6D02G332500	cDEG	14	30	25	5	83.3333
TraesCS7D02G164500	cDEG	14	30	26	4	86.6667				LOC_Os03g18850	pathogenesis-related Bet v I family protein
TraesCS7D02G358000	cDEG	14	30	19	11	63.3333
TraesCS5A02G234200	cDEG	16	29	22	7	75.8621	AT1G05010	ACO4	1-aminocyclopropane-1-carboxylate oxidase 4	LOC_Os09g27820	1-aminocyclopropane-1-carboxylate oxidase protein
TraesCS2D02G392900	cDEG	13	29	22	7	75.8621	AT4G10500		2-oxoglutarate (2OG) and Fe(II)-dependent oxygenase superfamily protein	LOC_Os04g49210	naringenin
TraesCS4B02G003300	cDEG	15	29	27	2	93.1034	AT2G36690		2-oxoglutarate (2OG) and Fe(II)-dependent oxygenase superfamily protein	LOC_Os08g44590	gibberellin 20 oxidase 2
TraesCS6A02G320700	cDEG	13	29	25	4	86.2069	AT5G20400		2-oxoglutarate (2OG) and Fe(II)-dependent oxygenase superfamily protein	LOC_Os06g07932	flavonol synthase/flavanone 3-hydroxylase
TraesCS5B02G121400	cDEG	13	29	21	8	72.4138	AT5G09300	T5E8_100	2-oxoisovalerate dehydrogenase subunit alpha 2%2C mitochondrial	LOC_Os12g08260	dehydrogenase E1 component domain containing protein
TraesCS5D02G038800	cDEG	13	29	26	3	89.6552	AT3G14440	NCED3	9-cis-epoxycarotenoid dioxygenase NCED3%2C chloroplastic	LOC_Os12g42280	9-cis-epoxycarotenoid dioxygenase 1
TraesCS5D02G087900	cDEG	14	29	26	3	89.6552	AT5G40010	AATP1	AAA-ATPase 1	LOC_Os12g24320	ATPase 3
TraesCS7B02G269700	cDEG	14	29	25	4	86.2069	AT3G21250	ABCC8	ABC transporter C family member 8	LOC_Os06g36650	ABC transporter family protein
TraesCS6B02G031300	cDEG	13	29	11	18	37.931	AT1G62660	BFRUCT3	Acid beta-fructofuranosidase 3%2C vacuolar	LOC_Os02g01590	glycosyl hydrolases
TraesCS4A02G238500	cDEG	15	29	25	4	86.2069	AT5G50300	AZG2	Adenine/guanine permease AZG2	LOC_Os11g24060	permease domain containing protein
TraesCS1B02G197000	cDEG	13	29	21	8	72.4138	AT2G36290		alpha/beta-Hydrolases superfamily protein	LOC_Os10g37710	hydrolase
TraesCS3B02G249600	cDEG	12	29	23	6	79.3103	AT3G15650		alpha/beta-Hydrolases superfamily protein	LOC_Os01g42690	OsPOP2 - Putative Prolyl Oligopeptidase homologue
TraesCS4B02G051600	cDEG	14	29	28	1	96.5517	AT1G73480		alpha/beta-Hydrolases superfamily protein	LOC_Os03g51010	hydrolase
TraesCS1D02G264700	cDEG	14	29	8	21	27.5862	AT1G77380	AAP3	Amino acid permease 3	LOC_Os01g66010	amino acid transporter
TraesCS6A02G125700	cDEG	13	29	2	27	6.89655	AT1G16060	ADAP	AP2-like ethylene-responsive transcription factor At1g16060	LOC_Os06g05340	AP2 domain containing protein
TraesCS1B02G133200	mDEG	10	29	7	22	24.1379	AT2G46330	AGP16	Arabinogalactan peptide 16	LOC_Os05g12580	expressed protein
TraesCS1D02G114500	cDEG	12	29	2	27	6.89655	AT2G46330	AGP16	Arabinogalactan peptide 16	LOC_Os05g12580	expressed protein
TraesCS4B02G044700	cDEG	13	29	26	3	89.6552	AT2G02850	ARPN	Basic blue protein	LOC_Os03g50160	plastocyanin-like domain containing protein
TraesCS3A02G260100	cDEG	14	29	23	6	79.3103	AT3G12500	CHI-B	Basic endochitinase B	LOC_Os06g51060	CHIT8 - Chitinase family protein precursor
TraesCS3D02G260300	cDEG	13	29	26	3	89.6552	AT3G12500	CHI-B	Basic endochitinase B	LOC_Os06g51060	CHIT8 - Chitinase family protein precursor
TraesCS2A02G271700	cDEG	13	29	14	15	48.2759	AT5G57150	BHLH35	basic helix-loop-helix (bHLH) DNA-binding superfamily protein	LOC_Os04g23550	basic helix-loop-helix family protein
TraesCS2B02G289900	cDEG	12	29	14	15	48.2759	AT5G57150	BHLH35	basic helix-loop-helix (bHLH) DNA-binding superfamily protein	LOC_Os04g23550	basic helix-loop-helix family protein
TraesCS4D02G314400	cDEG	13	29	19	10	65.5172	AT4G25700	BETA-OHASE 1	Beta-carotene 3-hydroxylase 1%2C chloroplastic	LOC_Os03g03370	fatty acid hydroxylase
TraesCS2D02G293200	cDEG	14	29	13	16	44.8276	AT3G52600	CWINV2	Beta-fructofuranosidase%2C insoluble isoenzyme CWINV2	LOC_Os04g33740	glycosyl hydrolases
TraesCS3D02G403300	cDEG	12	29	5	24	17.2414	AT1G21460	SWEET1	Bidirectional sugar transporter SWEET1	LOC_Os01g65880	nodulin MtN3 family protein
TraesCS3D02G415400	cDEG	16	29	22	7	75.8621	AT5G55450		Bifunctional inhibitor/lipid-transfer protein/seed storage 2S albumin superfamily protein	LOC_Os01g68580	LTPL38 - Protease inhibitor/seed storage/LTP family protein precursor
TraesCS4D02G360100	cDEG	14	29	4	25	13.7931	AT2G45180		Bifunctional inhibitor/lipid-transfer protein/seed storage 2S albumin superfamily protein	LOC_Os04g46830	LTPL122 - Protease inhibitor/seed storage/LTP family protein precursor
TraesCS5B02G491200	cDEG	15	29	21	8	72.4138	AT5G03510		C2H2-type zinc finger family protein	LOC_Os03g60560	ZOS3-21 - C2H2 zinc finger protein
TraesCS2B02G369000	cDEG	11	29	27	2	93.1034	AT2G43590		Chitinase family protein	LOC_Os04g41680	CHIT3 - Chitinase family protein precursor
TraesCS2A02G216500	cDEG	13	29	26	3	89.6552	AT4G23260	CRK18	cysteine-rich RLK (RECEPTOR-like protein kinase) 18	LOC_Os07g35680	TKL_IRAK_DUF26-lc22 - DUF26 kinases have homology to DUF26 containing loci
TraesCS4D02G265100	cDEG	13	29	23	6	79.3103	AT5G47530		Cytochrome b561 and DOMON domain-containing protein At5g47530	LOC_Os03g09880	AIR12
TraesCS3A02G215000	cDEG	13	29	27	2	93.1034	AT3G50930	BCS1	cytochrome BC1 synthesis	LOC_Os01g42030	mitochondrial chaperone BCS1
TraesCS2B02G357200	cDEG	14	29	25	4	86.2069	AT3G48270	CYP71A26	Cytochrome P450 71A26	LOC_Os04g40470	cytochrome P450
TraesCS6D02G363100	cDEG	13	29	23	6	79.3103	AT3G14690	CYP72A15	Cytochrome P450 72A15	LOC_Os01g43710	cytochrome P450 72A1
TraesCS4A02G183600	cDEG	14	29	16	13	55.1724	AT2G27690	CYP94C1	Cytochrome P450 94C1	LOC_Os11g05380	cytochrome P450
TraesCS4B02G135200	cDEG	13	29	20	9	68.9655	AT2G27690	CYP94C1	Cytochrome P450 94C1	LOC_Os11g05380	cytochrome P450
TraesCS2D02G006500	cDEG	14	29	25	4	86.2069	AT3G44250	CYP71B38	cytochrome P450%2C family 71%2C subfamily B%2C polypeptide 38	LOC_Os02g17760	cytochrome P450
TraesCS5B02G403000	cDEG	13	29	27	2	93.1034	AT4G37330	CYP81D4	cytochrome P450%2C family 81%2C subfamily D%2C polypeptide 4	LOC_Os03g55240	cytochrome P450
TraesCS2D02G372000	cDEG	15	29	27	2	93.1034	AT1G18590	SOT17	Cytosolic sulfotransferase 17	LOC_Os04g44460	sulfotransferase domain containing protein
TraesCS7A02G092700	cDEG	12	29	22	7	75.8621	AT5G25940		early nodulin-related	LOC_Os06g04950	early nodulin 93 ENOD93 protein
TraesCS4A02G005500	cDEG	16	29	5	24	17.2414	AT1G72360	ERF073	Ethylene-responsive transcription factor ERF073	LOC_Os03g08490	AP2 domain containing protein
TraesCS2A02G288000	cDEG	13	29	26	3	89.6552	AT5G13330	ERF113	Ethylene-responsive transcription factor ERF113	LOC_Os04g32620	ethylene-responsive transcription factor ERF114
TraesCS3D02G467300	cDEG	14	29	23	6	79.3103	AT1G03230		Eukaryotic aspartyl protease family protein	LOC_Os01g71090	xylanase inhibitor
TraesCS5A02G261400	cDEG	15	29	21	8	72.4138	AT4G20820		FAD-binding Berberine family protein	LOC_Os06g35700	reticuline oxidase-like protein precursor
TraesCS7B02G289600	cDEG	15	29	27	2	93.1034	AT5G39120		Germin-like protein subfamily 1 member 15	LOC_Os08g08980	cupin domain containing protein
TraesCS5D02G464000	cDEG	15	29	24	5	82.7586	AT1G18970	GLP1	Germin-like protein subfamily T member 1	LOC_Os03g58980	Cupin domain containing protein
TraesCS4B02G231400	cDEG	13	29	18	11	62.069	AT2G02000	GAD3	Glutamate decarboxylase 3	LOC_Os08g36320	decarboxylase
TraesCS4A02G349700	cDEG	14	29	19	10	65.5172	AT3G62760	GSTF13	Glutathione S-transferase F13	LOC_Os01g27210	glutathione S-transferase
TraesCS5D02G440700	cDEG	16	29	24	5	82.7586	AT3G62760	GSTF13	Glutathione S-transferase F13	LOC_Os01g27480	glutathione S-transferase
TraesCS2B02G244100	cDEG	14	29	22	7	75.8621	AT1G10370	GSTU17	Glutathione S-transferase U17	LOC_Os10g38160	glutathione S-transferase
TraesCS5D02G432600	cDEG	12	29	25	4	86.2069	AT1G17180	GSTU25	Glutathione S-transferase U25	LOC_Os03g57200	glutathione S-transferase
TraesCS1B02G158000	cDEG	15	29	23	6	79.3103	AT4G19810		Glycosyl hydrolase family protein with chitinase insertion domain	LOC_Os10g28050	chitinase 2
TraesCS3D02G478000	cDEG	13	29	24	5	82.7586	AT4G16260		Glycosyl hydrolase superfamily protein	LOC_Os01g71670	glycosyl hydrolases family 17
TraesCS2A02G545800	cDEG	13	29	1	28	3.44828	AT2G19130		G-type lectin S-receptor-like serine/threonine-protein kinase At2g19130	LOC_Os07g08860	S-domain receptor-like protein kinase
TraesCS5A02G548700	cDEG	14	29	25	4	86.2069	AT3G24520	HSFC1	Heat stress transcription factor C-1	LOC_Os02g13800	HSF-type DNA-binding domain containing protein
TraesCS4A02G211400	mDEG	10	29	9	20	31.0345	AT1G22990	HIPP22	Heavy metal transport/detoxification superfamily protein	LOC_Os08g31140	heavy metal-associated domain containing protein
TraesCS2B02G581900	cDEG	14	29	26	3	89.6552	AT3G04720	HEL	Hevein-like preproprotein	LOC_Os11g37950	WIP3 - Wound-induced protein precursor
TraesCS2A02G350800	cDEG	15	29	21	8	72.4138	AT3G54420	ATEP3	homolog of carrot EP3-3 chitinase	LOC_Os04g41680	CHIT3 - Chitinase family protein precursor
TraesCS2D02G348900	cDEG	15	29	21	8	72.4138	AT3G54420	ATEP3	homolog of carrot EP3-3 chitinase	LOC_Os04g41680	CHIT3 - Chitinase family protein precursor
TraesCS2D02G349000	cDEG	15	29	21	8	72.4138	AT3G54420	ATEP3	homolog of carrot EP3-3 chitinase	LOC_Os04g41680	CHIT3 - Chitinase family protein precursor
TraesCS7D02G401000	cDEG	14	29	23	6	79.3103	AT5G17540		HXXXD-type acyl-transferase family protein	LOC_Os06g49660	transferase family protein
TraesCS2D02G191800	cDEG	15	29	19	10	65.5172	AT2G23170	GH3.3	Indole-3-acetic acid-amido synthetase GH3.3	LOC_Os07g40290	OsGH3.8 - Probable indole-3-acetic acid-amido synthetase
TraesCS3B02G344800	cDEG	13	29	21	8	72.4138	AT1G19715	JAL3	Jacalin-related lectin 3	LOC_Os05g43240	jacalin-like lectin domain containing protein
TraesCS1D02G369800	cDEG	15	29	27	2	93.1034	AT3G15670		Late embryogenesis abundant protein (LEA) family protein	LOC_Os05g46480	late embryogenesis abundant protein
TraesCS3A02G253200	cDEG	13	29	27	2	93.1034	AT1G52690		Late embryogenesis abundant protein (LEA) family protein	LOC_Os01g50910	late embryogenesis abundant protein
TraesCS7A02G030100	cDEG	14	29	27	2	93.1034	AT1G32560		Late embryogenesis abundant protein%2C group 1 protein	LOC_Os06g02040	late embryogenesis abundant group 1
TraesCS3D02G381300	cDEG	14	29	9	20	31.0345	AT1G72180		Leucine-rich receptor-like protein kinase family protein	LOC_Os01g65650	receptor-like protein kinase HAIKU2 precursor
TraesCS5A02G197200	cDEG	12	29	8	21	27.5862	AT1G51800		Leucine-rich repeat protein kinase family protein	LOC_Os09g19350	expressed protein
TraesCS7B02G145200	cDEG	14	29	26	3	89.6552	AT3G45140	LOX2	Lipoxygenase 2%2C chloroplastic	LOC_Os08g39850	lipoxygenase
TraesCS4B02G304300	cDEG	14	29	24	5	82.7586	AT5G65380		MATE efflux family protein	LOC_Os03g08900	MATE efflux family protein
TraesCS3A02G149900	cDEG	13	29	28	1	96.5517	AT1G79900	BAC2	Mitochondrial arginine transporter BAC2	LOC_Os01g12520	mitochondrial carrier protein
TraesCS3D02G157800	cDEG	13	29	28	1	96.5517	AT1G79900	BAC2	Mitochondrial arginine transporter BAC2	LOC_Os01g12520	mitochondrial carrier protein
TraesCS3A02G256200	cDEG	14	29	20	9	68.9655	AT4G26890	MAPKKK16	mitogen-activated protein kinase kinase kinase 16	LOC_Os01g50400	STE_MEKK_ste11_MAP3K.5 - STE kinases include homologs to sterile 7
TraesCS3D02G256500	cDEG	14	29	17	12	58.6207	AT4G26890	MAPKKK16	mitogen-activated protein kinase kinase kinase 16	LOC_Os01g50400	STE_MEKK_ste11_MAP3K.5 - STE kinases include homologs to sterile 7
TraesCS1B02G274300	cDEG	15	29	27	2	93.1034	AT1G01720	NAC002	NAC domain-containing protein 2	LOC_Os05g34830	No apical meristem protein
TraesCS7A02G273000	cDEG	14	29	26	3	89.6552	AT2G17730	NIP2	NEP1-interacting protein 2	LOC_Os08g43670	RING-H2 finger protein ATL2B
TraesCS4B02G237300	cDEG	15	29	21	8	72.4138	AT2G16060	AHB1	Non-symbiotic hemoglobin 1	LOC_Os03g12510	non-symbiotic hemoglobin 2
TraesCS7B02G411200	cDEG	11	29	20	9	68.9655	AT2G26560	PLP2	Patatin-like protein 2	LOC_Os08g37180	patatin
TraesCS6D02G007400	cDEG	12	29	24	5	82.7586	AT1G78780		pathogenesis-related family protein	LOC_Os01g14590	pathogen-related protein
TraesCS4A02G263600	cDEG	12	29	26	3	89.6552	AT4G12470	AZI1	pEARLI1-like lipid transfer protein 1	LOC_Os03g50960	LTPL118 - Protease inhibitor/seed storage/LTP family protein precursor
TraesCS7A02G477100	cDEG	15	29	10	19	34.4828	AT5G05340	PER52	Peroxidase 52	LOC_Os02g14430	peroxidase precursor
TraesCS1D02G103500	cDEG	15	29	11	18	37.931	AT2G37040	PAL1	Phenylalanine ammonia-lyase 1	LOC_Os04g43800	phenylalanine ammonia-lyase
TraesCS2B02G224000	cDEG	13	29	14	15	48.2759	AT2G37040	PAL1	Phenylalanine ammonia-lyase 1	LOC_Os04g43800	phenylalanine ammonia-lyase
TraesCS6B02G291400	cDEG	13	29	28	1	96.5517	AT1G32700		PLATZ transcription factor family protein	LOC_Os02g46610	zinc-binding protein
TraesCS7B02G229300	cDEG	15	29	26	3	89.6552	AT4G29820	CFIS1	Pre-mRNA cleavage factor Im 25 kDa subunit 1	LOC_Os08g30820	cleavage and polyadenylation specificity factor subunit 5
TraesCS3B02G145500	cDEG	16	29	14	15	48.2759	AT3G62270	BOR2	Probable boron transporter 2	LOC_Os01g08020	boron transporter protein
TraesCS3A02G150800	cDEG	14	29	24	5	82.7586	AT1G01470	LEA14	Probable desiccation-related protein LEA14	LOC_Os01g12580	late embryogenesis abundant protein
TraesCS7A02G134100	cDEG	15	29	7	22	24.1379	AT5G20250	RFS6	Probable galactinol--sucrose galactosyltransferase 6	LOC_Os06g07600	uncharacterized glycosyltransferase
TraesCS4A02G059400	cDEG	16	29	25	4	86.2069	AT1G70440	SRO3	Probable inactive poly	LOC_Os03g12820	ATP8
TraesCS5B02G470100	cDEG	12	29	25	4	86.2069	AT5G43370	PHT1-2	Probable inorganic phosphate transporter 1-2	LOC_Os03g05610	inorganic phosphate transporter
TraesCS2A02G510800	cDEG	14	29	7	22	24.1379	AT3G16150		Probable isoaspartyl peptidase/L-asparaginase 2	LOC_Os04g55710	transposon protein
TraesCS5B02G275600	cDEG	13	29	6	23	20.6897	AT2G24580		Probable sarcosine oxidase	LOC_Os09g32290	FAD dependent oxidoreductase domain containing protein
TraesCS2B02G216800	cDEG	14	29	14	15	48.2759	AT5G55560	WNK11	Probable serine/threonine-protein kinase WNK11	LOC_Os07g39520	STE_PAK_Ste20_Slob_Wnk.5 - STE kinases include homologs to sterile 7
TraesCS5A02G225600	cDEG	13	29	22	7	75.8621	AT1G80840	WRKY40	Probable WRKY transcription factor 40	LOC_Os09g25060	WRKY76
TraesCS5B02G224100	cDEG	13	29	22	7	75.8621	AT1G80840	WRKY40	Probable WRKY transcription factor 40	LOC_Os09g25060	WRKY76
TraesCS7A02G508800	cDEG	13	29	10	19	34.4828	AT1G80840	WRKY40	Probable WRKY transcription factor 40	LOC_Os06g44010	WRKY28
TraesCS7D02G345700	cDEG	14	29	23	6	79.3103	AT2G46400	WRKY46	Probable WRKY transcription factor 46	LOC_Os05g25770	WRKY45
TraesCS1D02G300700	cDEG	13	29	22	7	75.8621	AT3G56400	WRKY70	Probable WRKY transcription factor 70	LOC_Os05g40060	WRKY48
TraesCS7A02G427300	cDEG	15	29	28	1	96.5517	AT4G25810	XTH23	Probable xyloglucan endotransglucosylase/hydrolase protein 23	LOC_Os06g48180	glycosyl hydrolases family 16
TraesCS7B02G327700	cDEG	14	29	5	24	17.2414	AT4G25810	XTH23	Probable xyloglucan endotransglucosylase/hydrolase protein 23	LOC_Os06g48160	glycosyl hydrolases family 16
TraesCS1A02G209100	cDEG	14	29	0	29	0	AT5G38710	POX2	Proline dehydrogenase 2%2C mitochondrial	LOC_Os10g40360	proline oxidase
TraesCS1A02G271000	cDEG	15	29	7	22	24.1379	AT5G17210		Protein of unknown function (DUF1218)	LOC_Os05g35930	expressed protein
TraesCS3A02G283700	cDEG	13	29	26	3	89.6552	AT2G34340		Protein of unknown function%2C DUF584	LOC_Os01g52740	expressed protein
TraesCS4B02G131500	cDEG	14	29	25	4	86.2069	AT5G13750	ZIFL1	Protein ZINC INDUCED FACILITATOR-LIKE 1	LOC_Os11g04104	major facilitator superfamily antiporter
TraesCS5D02G261400	cDEG	15	29	25	4	86.2069	AT3G22730		Putative F-box/kelch-repeat protein At3g22730	LOC_Os09g30180	OsFBX331 - F-box domain containing protein
TraesCS2A02G440600	cDEG	13	29	21	8	72.4138	AT5G48485	DIR1	Putative lipid-transfer protein DIR1	LOC_Os07g18990	LTPL40 - Protease inhibitor/seed storage/LTP family protein precursor
TraesCS2B02G460500	cDEG	15	29	21	8	72.4138	AT5G48485	DIR1	Putative lipid-transfer protein DIR1	LOC_Os07g18990	LTPL40 - Protease inhibitor/seed storage/LTP family protein precursor
TraesCS2D02G438200	cDEG	14	29	25	4	86.2069	AT5G48485	DIR1	Putative lipid-transfer protein DIR1	LOC_Os07g18990	LTPL40 - Protease inhibitor/seed storage/LTP family protein precursor
TraesCS5B02G076200	cDEG	12	29	22	7	75.8621	AT5G48485	DIR1	Putative lipid-transfer protein DIR1	LOC_Os07g18990	LTPL40 - Protease inhibitor/seed storage/LTP family protein precursor
TraesCS2B02G454500	cDEG	14	29	20	9	68.9655	AT5G57540	XTH13	Putative xyloglucan endotransglucosylase/hydrolase protein 13	LOC_Os04g51520	glycosyl hydrolases family 16
TraesCS2B02G287600	cDEG	16	29	23	6	79.3103	AT5G01410	PDX13	Pyridoxal 5'-phosphate synthase subunit PDX1.3	LOC_Os07g01020	SOR/SNZ family protein
TraesCS6A02G106000	cDEG	13	29	27	2	93.1034	AT2G21045	STR19	Rhodanese-like domain-containing protein 19%2C mitochondrial	LOC_Os02g01220	rhodanese-like domain containing protein
TraesCS2A02G158700	cDEG	12	29	24	5	82.7586	AT2G38900		Serine protease inhibitor%2C potato inhibitor I-type family protein	LOC_Os01g42860	inhibitor I family protein
TraesCS2D02G493700	cDEG	11	29	29	0	100	AT1G78290	SRK2C	Serine/threonine-protein kinase SRK2C	LOC_Os03g27280	CAMK_CAMK_like.19 - CAMK includes calcium/calmodulin depedent protein kinases
TraesCS1D02G089900	cDEG	13	29	27	2	93.1034	AT5G48930	HST	Shikimate O-hydroxycinnamoyltransferase	LOC_Os10g23820	transferase family protein
TraesCS5D02G342700	cDEG	15	29	24	5	82.7586	AT5G48930	HST	Shikimate O-hydroxycinnamoyltransferase	LOC_Os09g37200	transferase family protein
TraesCS6D02G122400	cDEG	12	29	28	1	96.5517	AT1G15330	PV42A	SNF1-related protein kinase regulatory subunit gamma-like PV42a	LOC_Os02g06410	CBS domain containing membrane protein
TraesCS4B02G167500	cDEG	12	29	29	0	100	AT4G02280	SUS3	Sucrose synthase 3	LOC_Os03g22120	sucrose synthase
TraesCS2B02G232900	cDEG	14	29	6	23	20.6897	AT3G19940	STP10	Sugar transport protein 10	LOC_Os01g38670	transporter family protein
TraesCS4B02G243500	cDEG	15	29	24	5	82.7586	AT5G26340	STP13	Sugar transport protein 13	LOC_Os03g11900	transporter family protein
TraesCS6A02G005700	cDEG	14	29	14	15	48.2759	AT5G66170	STR18	Thiosulfate sulfurtransferase 18	LOC_Os12g24020	rhodanese-like domain containing protein
TraesCS5A02G380900	cDEG	13	29	15	14	51.7241	AT5G43650	BHLH92	Transcription factor bHLH92	LOC_Os03g53020	helix-loop-helix DNA-binding domain containing protein
TraesCS5A02G063900	cDEG	14	29	22	7	75.8621	AT3G18950		Transducin/WD40 repeat-like superfamily protein	LOC_Os12g40260	WD-40 repeat family protein
TraesCS4A02G296600	cDEG	15	29	3	26	10.3448	AT5G23860	TUBB8	Tubulin beta-8 chain	LOC_Os03g56810	tubulin/FtsZ domain containing protein
TraesCS2A02G551100	cDEG	15	29	7	22	24.1379	AT5G62920	ARR6	Two-component response regulator ARR6	LOC_Os04g57720	OsRR6 type-A response regulator
TraesCS2D02G552200	cDEG	15	29	6	23	20.6897	AT5G62920	ARR6	Two-component response regulator ARR6	LOC_Os04g57720	OsRR6 type-A response regulator
TraesCS2B02G459100	cDEG	13	29	18	11	62.069	AT3G22370	AOX1A	Ubiquinol oxidase 1a%2C mitochondrial	LOC_Os04g51160	transposon protein
TraesCS5A02G198800	cDEG	15	29	24	5	82.7586	AT1G60190	PUB19	U-box domain-containing protein 19	LOC_Os09g21120	armadillo/beta-catenin repeat family protein
TraesCS3B02G144800	cDEG	17	29	21	8	72.4138	AT2G36780	UGT73C3	UDP-glycosyltransferase 73C3	LOC_Os01g08110	flavonol-3-O-glycoside-7-O-glucosyltransferase 1
TraesCS6D02G021100	cDEG	16	29	23	6	79.3103	AT1G22360	UGT85A2	UDP-glycosyltransferase 85A2	LOC_Os02g51930	cytokinin-O-glucosyltransferase 2
TraesCS3D02G534800	cDEG	12	29	27	2	93.1034	AT3G16520	UGT88A1	UDP-glycosyltransferase 88A1	LOC_Os01g53350	anthocyanidin 5
TraesCS6B02G176900	cDEG	13	29	22	7	75.8621	AT5G13210		Uncharacterised conserved protein UCP015417%2C vWA	LOC_Os02g08330	gp176
TraesCS4A02G230500	cDEG	14	29	25	4	86.2069	AT1G18480		Uncharacterized protein At1g18480	LOC_Os11g15570	Ser/Thr protein phosphatase family protein
TraesCS2A02G283000	cDEG	14	29	27	2	93.1034	AT1G27990		unknown protein%3B BEST Arabidopsis thaliana protein match is: unknown protein (TAIR:AT5G52420.1)%3B Has 86 Blast hits to 86 proteins in 15 species: Archae - 0%3B Bacteria - 0%3B Metazoa - 0%3B Fungi - 0%3B Plants - 84%3B Viruses - 0%3B Other Eukaryotes - 2 (source /.../ BLink).	LOC_Os04g31710	expressed protein
TraesCS3D02G289900	cDEG	13	29	0	29	0	AT5G11500		unknown protein%3B CONTAINS InterPro DOMAIN/s: Protein of unknown function DUF814 (InterPro:IPR008532)%3B Has 1807 Blast hits to 1807 proteins in 277 species: Archae - 0%3B Bacteria - 0%3B Metazoa - 736%3B Fungi - 347%3B Plants - 385%3B Viruses - 0%3B Other Eukaryo /.../339 (source: NCBI BLink).	LOC_Os01g54670	coiled-coil domain-containing protein 25
TraesCS6D02G275600	cDEG	12	29	29	0	100	AT5G07330		unknown protein%3B FUNCTIONS IN: molecular_function unknown%3B INVOLVED IN: biological_process unknown%3B LOCATED IN: mitochondrion%3B BEST Arabidopsis thaliana protein match is: unknown protein (TAIR:AT1G63060.1)%3B Has 1807 Blast hits to 1807 proteins in 27 /.../ies: Archae - 0%3B Bacteria - 0%3B Metazoa - 736%3B Fungi - 347%3B Plants - 385%3B Viruses - 0%3B Other Eukaryotes - 339 (source: NCBI…	LOC_Os11g32890	expressed protein
TraesCS4A02G260500	cDEG	13	29	28	1	96.5517	AT5G66780		unknown protein%3B Has 1807 Blast hits to 1807 proteins in 277 species: Archae - 0%3B Bacteria - 0%3B Metazoa - 736%3B Fungi - 347%3B Plants - 385%3B Viruses - 0%3B Other Eukaryotes - 339 (source: NCBI BLink).	LOC_Os03g51350	expressed protein
TraesCS3A02G528800	cDEG	13	29	21	8	72.4138	AT4G32940	GAMMA-VPE	Vacuolar-processing enzyme gamma-isozyme	LOC_Os01g37910	vacuolar-processing enzyme precursor
TraesCS3B02G597900	cDEG	14	29	25	4	86.2069	AT4G32940	GAMMA-VPE	Vacuolar-processing enzyme gamma-isozyme	LOC_Os01g37910	vacuolar-processing enzyme precursor
TraesCS3D02G534100	cDEG	14	29	25	4	86.2069	AT4G32940	GAMMA-VPE	Vacuolar-processing enzyme gamma-isozyme	LOC_Os01g37910	vacuolar-processing enzyme precursor
TraesCS2B02G536500	cDEG	15	29	20	9	68.9655	AT1G16130	WAKL2	Wall-associated receptor kinase-like 2	LOC_Os04g55760	OsWAK55 - OsWAK receptor-like protein kinase
TraesCS5B02G490600	cDEG	15	29	20	9	68.9655	AT3G46080	ZAT8	Zinc finger protein ZAT8	LOC_Os03g60560	ZOS3-21 - C2H2 zinc finger protein
TraesCS1B02G451900	cDEG	12	29	6	23	20.6897				LOC_Os05g50500	secretory protein
TraesCS1D02G086000	cDEG	12	29	27	2	93.1034				LOC_Os05g05030	expressed protein
TraesCS1D02G392000	cDEG	14	29	20	9	68.9655				LOC_Os11g42970	membrane associated DUF588 domain containing protein
TraesCS2A02G166200	cDEG	14	29	9	20	31.0345				LOC_Os03g27790	EF hand family protein
TraesCS3B02G038700	cDEG	14	29	12	17	41.3793				LOC_Os01g03380	BBTI6 - Bowman-Birk type bran trypsin inhibitor precursor
TraesCS3B02G079300	cDEG	15	29	25	4	86.2069				LOC_Os09g02160	DEFL47 - Defensin and Defensin-like DEFL family
TraesCS4A02G007800	cDEG	14	29	18	11	62.069				LOC_Os03g08330	ZIM domain containing protein
TraesCS4A02G214000	cDEG	15	29	26	3	89.6552				LOC_Os11g09350	expressed protein
TraesCS4A02G218500	cDEG	14	29	26	3	89.6552				LOC_Os11g07950	expressed protein
TraesCS4B02G299800	cDEG	15	29	13	16	44.8276				LOC_Os03g08520	DUF581 domain containing protein
TraesCS4D02G296000	cDEG	14	29	17	12	58.6207				LOC_Os03g08330	ZIM domain containing protein
TraesCS5B02G203000	cDEG	12	29	19	10	65.5172				LOC_Os09g23590	expressed protein
TraesCS5B02G351200	cDEG	13	29	26	3	89.6552				LOC_Os09g37730	expressed protein
TraesCS5B02G372100	cDEG	12	29	27	2	93.1034
TraesCS5B02G426700	cDEG	13	29	25	4	86.2069				LOC_Os11g26760	dehydrin
TraesCS6D02G397500	cDEG	12	29	21	8	72.4138
TraesCS7A02G364900	cDEG	14	29	27	2	93.1034
TraesCS7B02G259400	cDEG	14	29	19	10	65.5172
TraesCS7B02G261100	cDEG	14	29	23	6	79.3103
TraesCS7B02G262800	cDEG	14	29	21	8	72.4138
TraesCS7D02G345600	cDEG	13	29	29	0	100				LOC_Os10g04380	expressed protein
TraesCS6D02G302300	cDEG	15	28	22	6	78.5714	AT1G76690	OPR2	12-oxophytodienoate reductase 2	LOC_Os06g11240	12-oxophytodienoate reductase
TraesCS6A02G325700	cDEG	14	28	24	4	85.7143	AT1G05010	ACO4	1-aminocyclopropane-1-carboxylate oxidase 4	LOC_Os02g53180	1-aminocyclopropane-1-carboxylate oxidase protein
TraesCS6D02G305400	cDEG	13	28	19	9	67.8571	AT1G05010	ACO4	1-aminocyclopropane-1-carboxylate oxidase 4	LOC_Os02g53180	1-aminocyclopropane-1-carboxylate oxidase protein
TraesCS1B02G411100	cDEG	14	28	21	7	75	AT4G15560	DXS	1-deoxy-D-xylulose-5-phosphate synthase%2C chloroplastic	LOC_Os07g09190	transketolase
TraesCS2B02G412900	cDEG	13	28	23	5	82.1429	AT4G10500		2-oxoglutarate (2OG) and Fe(II)-dependent oxygenase superfamily protein	LOC_Os04g49210	naringenin
TraesCS4A02G109200	cDEG	12	28	17	11	60.7143	AT3G11180		2-oxoglutarate (2OG) and Fe(II)-dependent oxygenase superfamily protein	LOC_Os03g18030	leucoanthocyanidin dioxygenase
TraesCS4B02G081200	cDEG	15	28	22	6	78.5714	AT3G19000		2-oxoglutarate (2OG) and Fe(II)-dependent oxygenase superfamily protein	LOC_Os03g42130	gibberellin 20 oxidase 2
TraesCS4B02G346900	cDEG	12	28	14	14	50	AT5G24530	DMR6	2-oxoglutarate (2OG) and Fe(II)-dependent oxygenase superfamily protein	LOC_Os03g03034	flavonol synthase/flavanone 3-hydroxylase
TraesCS5A02G004800	cDEG	12	28	20	8	71.4286	AT1G47290	3BETAHSD/D1	3beta-hydroxysteroid-dehydrogenase/decarboxylase isoform 1	LOC_Os03g29150	NAD dependent epimerase/dehydratase family protein
TraesCS5A02G374000	cDEG	14	28	24	4	85.7143	AT3G14440	NCED3	9-cis-epoxycarotenoid dioxygenase NCED3%2C chloroplastic	LOC_Os03g44380	9-cis-epoxycarotenoid dioxygenase 1
TraesCS1D02G256500	cDEG	14	28	25	3	89.2857	AT5G40010	AATP1	AAA-ATPase 1	LOC_Os12g44210	ATPase
TraesCS2A02G451300	cDEG	13	28	27	1	96.4286	AT3G60160	ABCC9	ABC transporter C family member 9	LOC_Os04g49890	multidrug resistance-associated protein
TraesCS4B02G095200	cDEG	16	28	24	4	85.7143	AT1G71960	ABCG25	ABC transporter G family member 25	LOC_Os11g07600	ABC-2 type transporter domain containing protein
TraesCS1D02G293600	cDEG	14	28	0	28	0	AT2G38310	PYL4	Abscisic acid receptor PYL4	LOC_Os05g39580	bet v I allergen family protein
TraesCS6A02G023300	cDEG	14	28	10	18	35.7143	AT1G62660	BFRUCT3	Acid beta-fructofuranosidase 3%2C vacuolar	LOC_Os02g01590	glycosyl hydrolases
TraesCS6B02G031500	cDEG	14	28	11	17	39.2857	AT1G62660	BFRUCT3	Acid beta-fructofuranosidase 3%2C vacuolar	LOC_Os02g01590	glycosyl hydrolases
TraesCS6D02G026600	cDEG	13	28	13	15	46.4286	AT1G62660	BFRUCT3	Acid beta-fructofuranosidase 3%2C vacuolar	LOC_Os02g01590	glycosyl hydrolases
TraesCS7D02G009400	cDEG	12	28	15	13	53.5714	AT1G12240	BFRUCT4	Acid beta-fructofuranosidase 4%2C vacuolar	LOC_Os02g01590	glycosyl hydrolases
TraesCS4B02G076400	cDEG	13	28	24	4	85.7143	AT5G50300	AZG2	Adenine/guanine permease AZG2	LOC_Os11g24060	permease domain containing protein
TraesCS5D02G471100	cDEG	12	28	10	18	35.7143	AT5G19040	IPT5	Adenylate isopentenyltransferase 5%2C chloroplastic	LOC_Os03g59570	IPP transferase
TraesCS1A02G299100	cDEG	13	28	19	9	67.8571	AT3G08860	PYD4	Alanine--glyoxylate aminotransferase 2 homolog 3%2C mitochondrial	LOC_Os05g39770	aminotransferase
TraesCS4A02G366000	cDEG	15	28	24	4	85.7143	AT4G02340		alpha/beta-Hydrolases superfamily protein	LOC_Os03g61360	hydrolase
TraesCS1A02G264500	cDEG	14	28	4	24	14.2857	AT1G77380	AAP3	Amino acid permease 3	LOC_Os12g08090	amino acid transporter
TraesCS6B02G362700	cDEG	15	28	25	3	89.2857	AT5G18980		ARM repeat superfamily protein	LOC_Os03g24730	expressed protein
TraesCS5B02G152600	cDEG	14	28	16	12	57.1429	AT3G47340	ASN1	Asparagine synthetase	LOC_Os06g15420	asparagine synthetase
TraesCS1B02G229000	cDEG	14	28	12	16	42.8571	AT4G17090	BAM3	Beta-amylase 3%2C chloroplastic	LOC_Os10g41550	beta-amylase
TraesCS2B02G600200	cDEG	12	28	8	20	28.5714	AT5G44640	BGLU13	Beta-glucosidase 13	LOC_Os04g39880	Os4bglu12 - beta-glucosidase
TraesCS7A02G147300	cDEG	14	28	21	7	75	AT5G13170	SWEET15	Bidirectional sugar transporter SWEET15	LOC_Os02g30910	nodulin MtN3 family protein
TraesCS7D02G071200	cDEG	12	28	26	2	92.8571	AT2G36530	ENO2	Bifunctional enolase 2/transcriptional activator	LOC_Os10g08550	enolase
TraesCS1D02G381200	cDEG	14	28	28	0	100	AT3G18280		Bifunctional inhibitor/lipid-transfer protein/seed storage 2S albumin superfamily protein	LOC_Os05g47730	LTPL153 - Protease inhibitor/seed storage/LTP family protein precursor
TraesCS3A02G419800	cDEG	14	28	24	4	85.7143	AT5G55450		Bifunctional inhibitor/lipid-transfer protein/seed storage 2S albumin superfamily protein	LOC_Os01g68580	LTPL38 - Protease inhibitor/seed storage/LTP family protein precursor
TraesCS3B02G396400	cDEG	14	28	24	4	85.7143	AT5G05960		Bifunctional inhibitor/lipid-transfer protein/seed storage 2S albumin superfamily protein	LOC_Os01g62980	LTPL101 - Protease inhibitor/seed storage/LTP family protein precursor
TraesCS3D02G357700	cDEG	15	28	27	1	96.4286	AT5G05960		Bifunctional inhibitor/lipid-transfer protein/seed storage 2S albumin superfamily protein	LOC_Os01g62980	LTPL101 - Protease inhibitor/seed storage/LTP family protein precursor
TraesCS2D02G417100	cDEG	14	28	26	2	92.8571	AT4G38810		Calcium-binding EF-hand family protein	LOC_Os10g09850	EF hand family protein
TraesCS5A02G276700	cDEG	12	28	20	8	71.4286	AT3G21180	ACA9	Calcium-transporting ATPase 9%2C plasma membrane-type	LOC_Os08g40530	calcium-transporting ATPase 9
TraesCS7B02G105300	cDEG	11	28	12	16	42.8571	AT4G33720		CAP (Cysteine-rich secretory proteins%2C Antigen 5%2C and Pathogenesis-related 1 protein) superfamily protein	LOC_Os10g11500	SCP-like extracellular protein
TraesCS7D02G161200	cDEG	13	28	19	9	67.8571	AT4G25790		CAP (Cysteine-rich secretory proteins%2C Antigen 5%2C and Pathogenesis-related 1 protein) superfamily protein	LOC_Os01g28500	SCP-like extracellular protein
TraesCS6A02G381700	cDEG	14	28	24	4	85.7143	AT1G15950	CCR1	Cinnamoyl-CoA reductase 1	LOC_Os02g56680	dehydrogenase
TraesCS2A02G332700	cDEG	12	28	22	6	78.5714	AT4G05030		Copper transport protein family	LOC_Os04g39010	heavy metal associated domain containing protein
TraesCS6B02G217200	cDEG	14	28	26	2	92.8571	AT2G43750	OASB	Cysteine synthase%2C chloroplastic/chromoplastic	LOC_Os02g12900	cysteine synthase
TraesCS3D02G500800	cDEG	14	28	24	4	85.7143	AT4G23180	CRK10	Cysteine-rich receptor-like protein kinase 10	LOC_Os01g26390	TKL_IRAK_DUF26-lh.1 - DUF26 kinases have homology to DUF26 containing loci
TraesCS3A02G039500	cDEG	11	28	25	3	89.2857	AT3G45860	CRK4	Cysteine-rich receptor-like protein kinase 4	LOC_Os10g04720	TKL_IRAK_DUF26-la.5 - DUF26 kinases have homology to DUF26 containing loci
TraesCS5D02G488500	cDEG	13	28	21	7	75	AT3G48280	CYP71A25	Cytochrome P450 71A25	LOC_Os08g01450	cytochrome P450
TraesCS6D02G085100	cDEG	12	28	26	2	92.8571	AT1G13080	CYP71B2	Cytochrome P450 71B2	LOC_Os12g16720	cytochrome P450 71A1
TraesCS6A02G181000	cDEG	14	28	24	4	85.7143	AT3G26330	CYP71B37	Cytochrome P450 71B37	LOC_Os02g09390	cytochrome P450
TraesCS5A02G129500	cDEG	11	28	14	14	50	AT2G27690	CYP94C1	Cytochrome P450 94C1	LOC_Os12g05440	cytochrome P450
TraesCS2D02G157800	cDEG	13	28	19	9	67.8571	AT2G46960	CYP709B1	cytochrome P450%2C family 709%2C subfamily B%2C polypeptide 1	LOC_Os07g44130	cytochrome P450 72A1
TraesCS2B02G279200	cDEG	13	28	24	4	85.7143	AT4G37330	CYP81D4	cytochrome P450%2C family 81%2C subfamily D%2C polypeptide 4	LOC_Os03g55240	cytochrome P450
TraesCS1A02G156100	cDEG	15	28	12	16	42.8571	AT3G53450	LOG4	Cytokinin riboside 5'-monophosphate phosphoribohydrolase LOG4	LOC_Os10g33900	possible lysine decarboxylase domain containing protein
TraesCS2B02G200100	cDEG	13	28	24	4	85.7143	AT2G03760	SOT12	Cytosolic sulfotransferase 12	LOC_Os07g41460	sulfotransferase domain containing protein
TraesCS2D02G181000	cDEG	13	28	22	6	78.5714	AT2G03760	SOT12	Cytosolic sulfotransferase 12	LOC_Os07g41460	sulfotransferase domain containing protein
TraesCS1D02G012000	cDEG	14	28	24	4	85.7143	AT2G02120	PDF2.1	Defensin-like protein 4	LOC_Os02g41904	DEF7 - Defensin and Defensin-like DEFL family
TraesCS7A02G057700	cDEG	12	28	19	9	67.8571	AT4G25480	DREB1A	Dehydration-responsive element-binding protein 1A	LOC_Os06g03670	dehydration-responsive element-binding protein
TraesCS7A02G560000	cDEG	13	28	26	2	92.8571	AT3G50970	XERO2	Dehydrin Xero 2	LOC_Os11g26790	dehydrin
TraesCS5B02G169100	cDEG	12	28	6	22	21.4286	AT1G55790		Domain of unknown function (DUF2431)	LOC_Os09g09930	heavy metal transport/detoxification protein
TraesCS6B02G346000	cDEG	12	28	18	10	64.2857	AT3G05200	ATL6	E3 ubiquitin-protein ligase ATL6	LOC_Os02g52210	zinc finger
TraesCS3D02G338400	cDEG	15	28	16	12	57.1429	AT1G69530	EXPA1	Expansin-A1	LOC_Os01g60770	expansin precursor
TraesCS7B02G273600	cDEG	13	28	22	6	78.5714	AT5G44410		FAD-binding Berberine family protein	LOC_Os06g35650	reticuline oxidase-like protein precursor
TraesCS7B02G257400	cDEG	14	28	7	21	25	AT1G80440		F-box/kelch-repeat protein At1g80440	LOC_Os06g39370	OsFBK16 - F-box domain and kelch repeat containing protein
TraesCSU02G145700	cDEG	12	28	22	6	78.5714	AT5G39110	GLP6	Germin-like protein subfamily 1 member 14	LOC_Os08g08990	Cupin domain containing protein
TraesCS4D02G031700	cDEG	13	28	21	7	75	AT1G18980		Germin-like protein subfamily T member 2	LOC_Os03g48780	Cupin domain containing protein
TraesCS5D02G566200	cDEG	13	28	6	22	21.4286	AT4G25420	GA20OX1	Gibberellin 20 oxidase 1	LOC_Os03g63970	gibberellin 20 oxidase 1
TraesCS3B02G328700	cDEG	13	28	17	11	60.7143	AT1G78440	GA2OX1	Gibberellin 2-beta-dioxygenase 1	LOC_Os01g55240	gibberellin 2-beta-dioxygenase
TraesCS3D02G293800	cDEG	14	28	16	12	57.1429	AT1G78440	GA2OX1	Gibberellin 2-beta-dioxygenase 1	LOC_Os01g55240	gibberellin 2-beta-dioxygenase
TraesCS1A02G186100	cDEG	16	28	25	3	89.2857	AT1G10370	GSTU17	Glutathione S-transferase U17	LOC_Os10g38740	glutathione S-transferase
TraesCS2A02G218700	cDEG	12	28	22	6	78.5714	AT1G10370	GSTU17	Glutathione S-transferase U17	LOC_Os10g38160	glutathione S-transferase
TraesCS1B02G194900	cDEG	14	28	25	3	89.2857	AT1G10360	GSTU18	Glutathione S-transferase U18	LOC_Os10g38140	glutathione S-transferase
TraesCS3B02G370300	cDEG	12	28	7	21	25	AT3G02040	GDPD1	Glycerophosphodiester phosphodiesterase GDPD1%2C chloroplastic	LOC_Os02g31030	glycerophosphoryl diester phosphodiesterase family protein
TraesCS7A02G263000	cDEG	11	28	2	26	7.14286	AT5G41080	GDPD2	Glycerophosphodiester phosphodiesterase GDPD2	LOC_Os08g42390	glycerophosphoryl diester phosphodiesterase family protein
TraesCS1B02G249000	cDEG	14	28	14	14	50	AT4G16260		Glycosyl hydrolase superfamily protein	LOC_Os05g31140	glycosyl hydrolases family 17
TraesCS3B02G529700	cDEG	12	28	24	4	85.7143	AT4G16260		Glycosyl hydrolase superfamily protein	LOC_Os01g71670	glycosyl hydrolases family 17
TraesCS3D02G477300	cDEG	11	28	19	9	67.8571	AT4G16260		Glycosyl hydrolase superfamily protein	LOC_Os01g71670	glycosyl hydrolases family 17
TraesCS4B02G207900	cDEG	13	28	19	9	67.8571	AT5G02230		Haloacid dehalogenase-like hydrolase (HAD) superfamily protein	LOC_Os03g16670	haloacid dehalogenase-like hydrolase family protein
TraesCS6D02G049600	cDEG	13	28	28	0	100	AT5G66110	HIPP27	Heavy metal transport/detoxification superfamily protein	LOC_Os04g17100	heavy metal-associated domain containing protein
TraesCS6B02G082600	cDEG	13	28	6	22	21.4286	AT5G22880	H2B	Histone H2B.10	LOC_Os05g49860	Core histone H2A/H2B/H3/H4 domain containing protein
TraesCS2A02G350900	cDEG	13	28	22	6	78.5714	AT3G54420	ATEP3	homolog of carrot EP3-3 chitinase	LOC_Os04g41680	CHIT3 - Chitinase family protein precursor
TraesCS5D02G074300	cDEG	14	28	23	5	82.1429	AT5G50720	HVA22E	HVA22-like protein e	LOC_Os11g30500	HVA22
TraesCS7B02G004800	cDEG	15	28	23	5	82.1429	AT1G31490		HXXXD-type acyl-transferase family protein	LOC_Os06g05790	transferase family domain containing protein
TraesCS7B02G307700	cDEG	14	28	24	4	85.7143	AT5G17540		HXXXD-type acyl-transferase family protein	LOC_Os06g49660	transferase family protein
TraesCS2D02G101200	cDEG	11	28	27	1	96.4286	AT2G39050		hydroxyproline-rich glycoprotein family protein	LOC_Os07g48460	stress responsive protein
TraesCS7D02G364900	cDEG	15	28	5	23	17.8571	AT1G14520	MIOX1	Inositol oxygenase 1	LOC_Os06g36560	inositol oxygenase
TraesCS1D02G117100	cDEG	12	28	25	3	89.2857	AT1G80160		Lactoylglutathione lyase / glyoxalase I family protein	LOC_Os05g07940	glyoxalase family protein
TraesCS3D02G254100	cDEG	13	28	28	0	100	AT1G52690		Late embryogenesis abundant protein (LEA) family protein	LOC_Os01g50910	late embryogenesis abundant protein
TraesCS1D02G005800	cDEG	14	28	25	3	89.2857				LOC_Os02g33070	expressed protein
TraesCS2B02G111900	cDEG	14	28	25	3	89.2857				LOC_Os07g48900	expressed protein
TraesCS1B02G410400	cDEG	14	28	15	13	53.5714				LOC_Os11g42970	membrane associated DUF588 domain containing protein
TraesCS6B02G089700	cDEG	12	28	1	27	3.57143	AT5G20480	EFR	LRR receptor-like serine/threonine-protein kinase EFR	LOC_Os11g29790	receptor kinase
TraesCS5A02G548200	cDEG	14	28	7	21	25	AT1G02170	AMC1	Metacaspase-1	LOC_Os03g27120	ICE-like protease p20 domain containing protein
TraesCS5A02G548600	cDEG	14	28	3	25	10.7143	AT1G02170	AMC1	Metacaspase-1	LOC_Os03g27120	ICE-like protease p20 domain containing protein
TraesCS5B02G236300	cDEG	12	28	22	6	78.5714	AT5G14040	MPT3	Mitochondrial phosphate carrier protein 3%2C mitochondrial	LOC_Os04g37600	phosphate carrier protein
TraesCS1B02G089800	cDEG	12	28	10	18	35.7143	AT5G20090	MPC1	Mitochondrial pyruvate carrier 1	LOC_Os09g20660	UPF0041 domain containing protein
TraesCS1D02G073900	cDEG	12	28	6	22	21.4286	AT5G20090	MPC1	Mitochondrial pyruvate carrier 1	LOC_Os09g20660	UPF0041 domain containing protein
TraesCS1D02G263800	cDEG	16	28	21	7	75	AT1G01720	NAC002	NAC domain-containing protein 2	LOC_Os05g34830	No apical meristem protein
TraesCS2A02G101900	cDEG	14	28	22	6	78.5714	AT1G61110	NAC025	NAC transcription factor 25	LOC_Os07g48450	no apical meristem protein
TraesCS2A02G102000	cDEG	14	28	24	4	85.7143	AT1G61110	NAC025	NAC transcription factor 25	LOC_Os07g48450	no apical meristem protein
TraesCS3B02G026700	cDEG	14	28	3	25	10.7143	AT3G18200		nodulin MtN21 /EamA-like transporter family protein	LOC_Os01g02870	auxin-induced protein 5NG4
TraesCS2D02G414200	cDEG	15	28	6	22	21.4286	AT5G47240	NUDT8	Nudix hydrolase 8	LOC_Os04g46280	hydrolase
TraesCS4A02G296300	cDEG	13	28	24	4	85.7143	AT4G11650	OSM34	Osmotin-like protein OSM34	LOC_Os03g45960	thaumatin
TraesCS3B02G315200	cDEG	13	28	25	3	89.2857	AT1G78780		pathogenesis-related family protein	LOC_Os01g53090	pathogen-related protein
TraesCS2D02G107900	cDEG	15	28	7	21	25	AT5G05340	PER52	Peroxidase 52	LOC_Os07g48030	peroxidase precursor
TraesCS2A02G196700	cDEG	13	28	12	16	42.8571	AT2G37040	PAL1	Phenylalanine ammonia-lyase 1	LOC_Os04g43800	phenylalanine ammonia-lyase
TraesCS2D02G204400	cDEG	15	28	13	15	46.4286	AT3G53260	PAL2	Phenylalanine ammonia-lyase 2	LOC_Os04g43800	phenylalanine ammonia-lyase
TraesCS1A02G166600	cDEG	13	28	28	0	100	AT2G15220		Plant basic secretory protein (BSP) family protein	LOC_Os10g34920	secretory protein
TraesCS1B02G183100	cDEG	13	28	24	4	85.7143	AT2G15220		Plant basic secretory protein (BSP) family protein	LOC_Os10g34920	secretory protein
TraesCS5B02G106900	cDEG	11	28	26	2	92.8571	AT3G18830	PLT5	Polyol transporter 5	LOC_Os12g32760	transporter family protein
TraesCS5B02G463600	cDEG	12	28	1	27	3.57143	AT1G55320	AAE18	Probable acyl-activating enzyme 18%2C peroxisomal	LOC_Os03g59080	AMP-binding enzyme
TraesCS3D02G127300	cDEG	14	28	11	17	39.2857	AT3G62270	BOR2	Probable boron transporter 2	LOC_Os01g08020	boron transporter protein
TraesCS1D02G239000	cDEG	16	28	18	10	64.2857	AT1G24620	CML25	Probable calcium-binding protein CML25	LOC_Os05g31620	OsCML15 - Calmodulin-related calcium sensor protein
TraesCS2D02G146400	cDEG	14	28	14	14	50	AT5G23530	CXE18	Probable carboxylesterase 18	LOC_Os07g44910	gibberellin receptor GID1L2
TraesCS5D02G068400	cDEG	13	28	25	3	89.2857	AT1G47480	CXE2	Probable carboxylesterase 2	LOC_Os02g35940	gibberellin receptor GID1L2
TraesCS2A02G382700	cDEG	15	28	14	14	50	AT1G08630	THA1	Probable low-specificity L-threonine aldolase 1	LOC_Os04g43650	L-allo-threonine aldolase
TraesCS2A02G012500	cDEG	14	28	23	5	82.1429	AT3G47570		Probable LRR receptor-like serine/threonine-protein kinase At3g47570	LOC_Os02g13780	receptor-like protein kinase 2 precursor
TraesCS7B02G301400	cDEG	15	28	23	5	82.1429	AT4G13780		Probable methionine--tRNA ligase	LOC_Os10g26050	methionyl-tRNA synthetase
TraesCS4D02G198000	cDEG	13	28	3	25	10.7143	AT3G54770	ARP1	Probable RNA-binding protein ARP1	LOC_Os03g17760	RNA recognition motif containing protein
TraesCS3A02G288800	cDEG	15	28	24	4	85.7143	AT5G19600	SULTR3%3B5	Probable sulfate transporter 3.5	LOC_Os01g52130	sulfate transporter
TraesCS1D02G429800	cDEG	14	28	24	4	85.7143	AT2G47260	WRKY23	Probable WRKY transcription factor 23	LOC_Os05g50610	WRKY8
TraesCS6A02G146900	cDEG	12	28	13	15	46.4286	AT1G80840	WRKY40	Probable WRKY transcription factor 40	LOC_Os02g08440	WRKY71
TraesCS6B02G175100	cDEG	13	28	14	14	50	AT1G80840	WRKY40	Probable WRKY transcription factor 40	LOC_Os02g08440	WRKY71
TraesCS7B02G418500	cDEG	15	28	10	18	35.7143	AT1G80840	WRKY40	Probable WRKY transcription factor 40	LOC_Os06g44010	WRKY28
TraesCS7D02G497400	cDEG	13	28	12	16	42.8571	AT1G80840	WRKY40	Probable WRKY transcription factor 40	LOC_Os06g44010	WRKY28
TraesCS7A02G338500	cDEG	15	28	20	8	71.4286	AT2G46400	WRKY46	Probable WRKY transcription factor 46	LOC_Os05g25770	WRKY45
TraesCS1A02G358100	cDEG	13	28	15	13	53.5714	AT5G64810	WRKY51	Probable WRKY transcription factor 51	LOC_Os05g46020	WRKY7
TraesCS2D02G489700	cDEG	13	28	23	5	82.1429	AT3G56400	WRKY70	Probable WRKY transcription factor 70	LOC_Os05g25770	WRKY45
TraesCS2A02G011000	cDEG	12	28	23	5	82.1429	AT5G13080	WRKY75	Probable WRKY transcription factor 75	LOC_Os11g29870	WRKY72
TraesCS2B02G010500	cDEG	11	28	21	7	75	AT5G13080	WRKY75	Probable WRKY transcription factor 75	LOC_Os11g29870	WRKY72
TraesCS7D02G419900	cDEG	13	28	5	23	17.8571	AT4G25810	XTH23	Probable xyloglucan endotransglucosylase/hydrolase protein 23	LOC_Os06g48160	glycosyl hydrolases family 16
TraesCS7A02G363000	cDEG	14	28	17	11	60.7143	AT2G36870	XTH32	Probable xyloglucan endotransglucosylase/hydrolase protein 32	LOC_Os07g29750	glycosyl hydrolases family 16
TraesCS3A02G414300	cDEG	14	28	4	24	14.2857	AT2G39890	PROT1	Proline transporter 1	LOC_Os01g68050	transmembrane amino acid transporter protein
TraesCS6D02G296200	cDEG	12	28	9	19	32.1429	AT4G08950	EXO	Protein EXORDIUM	LOC_Os02g52010	phosphate-induced protein 1 conserved region domain containing protein
TraesCS4D02G039900	cDEG	14	28	8	20	28.5714	AT5G22090		Protein FAF-like%2C chloroplastic	LOC_Os03g49830	expressed protein
TraesCS1A02G211000	cDEG	12	28	0	28	0	AT1G12110	NPF6.3	Protein NRT1/ PTR FAMILY 6.3	LOC_Os10g40600	peptide transporter PTR2
TraesCS6B02G309200	cDEG	15	28	22	6	78.5714	AT1G32450	NPF7.3	Protein NRT1/ PTR FAMILY 7.3	LOC_Os02g48570	peptide transporter PTR2
TraesCS6D02G260500	cDEG	14	28	23	5	82.1429	AT1G32450	NPF7.3	Protein NRT1/ PTR FAMILY 7.3	LOC_Os02g48570	peptide transporter PTR2
TraesCS6B02G295000	cDEG	13	28	17	11	60.7143	AT2G02040	NPF8.3	Protein NRT1/ PTR FAMILY 8.3	LOC_Os02g47090	peptide transporter PTR2
TraesCS3D02G283100	cDEG	12	28	28	0	100	AT1G29680		Protein of unknown function (DUF1264)	LOC_Os01g52830	DUF1264 domain containing protein
TraesCS3A02G268800	cDEG	14	28	19	9	67.8571	AT4G21700		Protein of unknown function (DUF2921)	LOC_Os01g48620	expressed protein
TraesCS3B02G298800	cDEG	16	28	26	2	92.8571	AT3G18215		Protein of unknown function%2C DUF599	LOC_Os02g19060	expressed protein
TraesCS3D02G249000	cDEG	13	28	27	1	96.4286	AT1G72770	HAB1	Protein phosphatase 2C 16	LOC_Os05g46040	protein phosphatase 2C
TraesCS2D02G456900	cDEG	12	28	25	3	89.2857	AT1G18330	RVE7	Protein REVEILLE 7	LOC_Os04g49450	MYB family transcription factor
TraesCS4B02G088300	cDEG	13	28	2	26	7.14286	AT1G33340		Putative clathrin assembly protein At1g33340	LOC_Os11g14000	ANTH domain containing protein
TraesCS5A02G554600	cDEG	12	28	9	19	32.1429	AT5G23750		Remorin family protein	LOC_Os03g02040	remorin
TraesCSU02G033600	cDEG	11	28	3	25	10.7143	AT5G23750		Remorin family protein	LOC_Os03g02040	remorin
TraesCS6A02G339600	cDEG	16	28	24	4	85.7143	AT2G02990	RNS1	Ribonuclease 1	LOC_Os08g33710	ribonuclease T2 family domain containing protein
TraesCS5D02G342800	cDEG	13	28	24	4	85.7143	AT5G48930	HST	Shikimate O-hydroxycinnamoyltransferase	LOC_Os09g37200	transferase family protein
TraesCS7A02G183100	cDEG	13	28	24	4	85.7143	AT1G53210		sodium/calcium exchanger family protein / calcium-binding EF hand family protein	LOC_Os02g14980	calcium-binding EF hand family protein
TraesCS2D02G396700	cDEG	14	28	24	4	85.7143	AT1G63010		SPX domain-containing membrane protein At1g63010	LOC_Os04g48390	uncharacterized membrane protein
TraesCS5A02G004700	cDEG	13	28	22	6	78.5714	AT1G11680	CYP51G1	Sterol 14-demethylase	LOC_Os05g34325	cytochrome P450 51
TraesCS5D02G012000	cDEG	13	28	21	7	75	AT1G11680	CYP51G1	Sterol 14-demethylase	LOC_Os05g34325	cytochrome P450 51
TraesCS5D02G044100	cDEG	13	28	9	19	32.1429	AT4G10520		Subtilase family protein	LOC_Os04g03100	OsSub35 - Putative Subtilisin homologue
TraesCS3D02G105000	cDEG	13	28	26	2	92.8571	AT1G11260	STP1	Sugar transport protein 1	LOC_Os11g38160	transporter family protein
TraesCS2A02G205500	cDEG	13	28	9	19	32.1429	AT3G19930	STP4	Sugar transport protein 4	LOC_Os09g12590	transporter family protein
TraesCS2B02G174500	cDEG	14	28	25	3	89.2857	AT4G01870		tolB protein-related	LOC_Os07g44410	WD40-like Beta Propeller Repeat family protein
TraesCS3B02G213600	cDEG	14	28	17	11	60.7143	AT5G47560	TDT	Tonoplast dicarboxylate transporter	LOC_Os09g31130	citrate transporter
TraesCSU02G096900	cDEG	13	28	12	16	42.8571	AT5G47560	TDT	Tonoplast dicarboxylate transporter	LOC_Os08g39370	citrate transporter
TraesCS2B02G182500	cDEG	13	28	23	5	82.1429	AT2G30490	CYP73A5	Trans-cinnamate 4-monooxygenase	LOC_Os02g26810	cytochrome P450
TraesCS3D02G336900	cDEG	13	28	25	3	89.2857	AT2G30490	CYP73A5	Trans-cinnamate 4-monooxygenase	LOC_Os01g60450	cytochrome P450
TraesCS5D02G244000	cDEG	12	28	19	9	67.8571	AT3G50330	HEC2	Transcription factor HEC2	LOC_Os09g28210	bHelix-loop-helix transcription factor
TraesCS5B02G068600	cDEG	12	28	20	8	71.4286	AT3G18950		Transducin/WD40 repeat-like superfamily protein	LOC_Os12g40260	WD-40 repeat family protein
TraesCS3A02G390300	cDEG	14	28	5	23	17.8571	AT5G14360		Ubiquitin-like superfamily protein	LOC_Os01g67950	ubiquitin family protein
TraesCS7D02G201600	cDEG	14	28	16	12	57.1429	AT5G37490	PUB21	U-box domain-containing protein 21	LOC_Os06g13870	U-box protein CMPG1
TraesCSU02G021200	cDEG	13	28	18	10	64.2857	AT2G32300	UCC1	uclacyanin 1	LOC_Os08g04340	plastocyanin-like domain containing protein
TraesCS7D02G190600	cDEG	14	28	18	10	64.2857	AT2G36800	UGT73C5	UDP-glycosyltransferase 73C5	LOC_Os10g09990	cytokinin-O-glucosyltransferase 3
TraesCS2A02G028700	cDEG	14	28	22	6	78.5714	AT1G22360	UGT85A2	UDP-glycosyltransferase 85A2	LOC_Os02g36830	cytokinin-O-glucosyltransferase 2
TraesCS7A02G216000	cDEG	14	28	21	7	75	AT3G16520	UGT88A1	UDP-glycosyltransferase 88A1	LOC_Os06g18140	UDP-glucoronosyl and UDP-glucosyl transferase domain containing protein
TraesCS2D02G104300	cDEG	14	28	12	16	42.8571	AT5G05190	Y-1	Uncharacterized protein At5g05190	LOC_Os07g48280	expressed protein
TraesCS3B02G396300	cDEG	15	28	18	10	64.2857	AT2G39855		unknown protein%3B FUNCTIONS IN: molecular_function unknown%3B INVOLVED IN: biological_process unknown%3B LOCATED IN: chloroplast%3B BEST Arabidopsis thaliana protein match is: unknown protein (TAIR:AT3G55646.1)%3B Has 35333 Blast hits to 34131 proteins in 24 /.../cies: Archae - 798%3B Bacteria - 22429%3B Metazoa - 974%3B Fungi - 991%3B Plants - 531%3B Viruses - 0%3B Other Eukaryotes - 9610 (sour…	LOC_Os01g62970	expressed protein
TraesCS6A02G145100	cDEG	14	28	27	1	96.4286	AT2G12400		unknown protein%3B FUNCTIONS IN: molecular_function unknown%3B INVOLVED IN: biological_process unknown%3B LOCATED IN: endomembrane system%3B EXPRESSED IN: 25 plant structures%3B EXPRESSED DURING: 13 growth stages%3B BEST Arabidopsis thaliana protein match is: u /.../ protein (TAIR:AT2G25270.1)%3B Has 177 Blast hits to 172 proteins in 23 species: Archae - 0%3B Bacteria - 2%3B Metazoa - 3%3B Fungi …	LOC_Os02g09080	expressed protein
TraesCS6A02G323000	cDEG	15	28	19	9	67.8571	AT2G31945		unknown protein%3B FUNCTIONS IN: molecular_function unknown%3B INVOLVED IN: biological_process unknown%3B LOCATED IN: endomembrane system%3B EXPRESSED IN: 8 plant structures%3B EXPRESSED DURING: 4 anthesis%2C petal differentiation and expansion stage%3B BEST Arab /.../s thaliana protein match is: unknown protein (TAIR:AT1G05575.1)%3B Has 61 Blast hits to 61 proteins in 10 species: Archae - 0%3B B…	LOC_Os02g53410	expressed protein
TraesCS7A02G367900	cDEG	14	28	3	25	10.7143	AT5G62550		unknown protein%3B FUNCTIONS IN: molecular_function unknown%3B INVOLVED IN: biological_process unknown%3B LOCATED IN: plasma membrane%3B EXPRESSED IN: 17 plant structures%3B EXPRESSED DURING: 9 growth stages%3B Has 14949 Blast hits to 9947 proteins in 971 speci /.../chae - 43%3B Bacteria - 3248%3B Metazoa - 4424%3B Fungi - 1542%3B Plants - 562%3B Viruses - 55%3B Other Eukaryotes - 5075 (source: N…	LOC_Os06g38960	expressed protein
TraesCS1D02G144400	cDEG	12	28	22	6	78.5714	AT1G07040		unknown protein%3B INVOLVED IN: biological_process unknown%3B LOCATED IN: chloroplast%3B EXPRESSED IN: 24 plant structures%3B EXPRESSED DURING: 14 growth stages%3B BEST Arabidopsis thaliana protein match is: unknown protein (TAIR:AT1G27030.1)%3B Has 540 Blast h /.../ 538 proteins in 187 species: Archae - 0%3B Bacteria - 333%3B Metazoa - 0%3B Fungi - 0%3B Plants - 67%3B Viruses - 0%3B Other Eukary…	LOC_Os10g32680	expressed protein
TraesCS7A02G427600	cDEG	13	28	4	24	14.2857	AT5G57560	XTH22	Xyloglucan endotransglucosylase/hydrolase protein 22	LOC_Os06g48160	glycosyl hydrolases family 16
TraesCS1D02G276200	cDEG	13	28	21	7	75	AT3G57670	WIP2	Zinc finger protein WIP2	LOC_Os05g37190	ZOS5-08 - C2H2 zinc finger protein
TraesCS3A02G155300	cDEG	13	28	1	27	3.57143				LOC_Os01g13040	expressed protein
TraesCS3A02G435800	cDEG	14	28	2	26	7.14286				LOC_Os01g69960	expressed protein
TraesCS4B02G097300	cDEG	13	28	25	3	89.2857				LOC_Os11g07950	expressed protein
TraesCS4B02G187800	cDEG	12	28	20	8	71.4286				LOC_Os03g18850	pathogenesis-related Bet v I family protein
TraesCS4D02G063200	cDEG	14	28	26	2	92.8571				LOC_Os03g52370	PIII4 - Proteinase inhibitor II family protein precursor
TraesCS5B02G372200	cDEG	13	28	27	1	96.4286				LOC_Os11g26790	dehydrin
TraesCS5D02G017500	cDEG	15	28	23	5	82.1429
TraesCS5D02G165000	cDEG	14	28	24	4	85.7143				LOC_Os09g02180	expressed protein
TraesCS5D02G199200	cDEG	15	28	18	10	64.2857				LOC_Os09g19970	expressed protein
TraesCS5D02G433200	cDEG	14	28	26	2	92.8571				LOC_Os11g26760	dehydrin
TraesCS6D02G083500	cDEG	14	28	14	14	50				LOC_Os02g04130	DUF1645 domain containing protein
TraesCS7A02G176400	cDEG	13	28	16	12	57.1429				LOC_Os08g31090	expressed protein
TraesCS7B02G081400	cDEG	12	28	18	10	64.2857				LOC_Os08g31090	expressed protein
TraesCS1A02G082200	cDEG	12	27	23	4	85.1852	AT1G48320	DHNAT1	1%2C4-dihydroxy-2-naphthoyl-CoA thioesterase 1	LOC_Os05g04660	thioesterase family protein
TraesCS7A02G174700	cDEG	14	27	18	9	66.6667	AT1G76690	OPR2	12-oxophytodienoate reductase 2	LOC_Os06g11240	12-oxophytodienoate reductase
TraesCS7B02G079500	cDEG	15	27	19	8	70.3704	AT1G76690	OPR2	12-oxophytodienoate reductase 2	LOC_Os06g11240	12-oxophytodienoate reductase
TraesCS7D02G176000	cDEG	12	27	19	8	70.3704	AT1G76690	OPR2	12-oxophytodienoate reductase 2	LOC_Os06g11290	12-oxophytodienoate reductase
TraesCS6D02G322300	cDEG	13	27	25	2	92.5926	AT1G54050	HSP17.4B	17.4 kDa class III heat shock protein	LOC_Os02g54140	hsp20/alpha crystallin family protein
TraesCS7D02G516200	cDEG	15	27	15	12	55.5556	AT2G19590	ACO1	1-aminocyclopropane-1-carboxylate oxidase 1	LOC_Os01g39860	1-aminocyclopropane-1-carboxylate oxidase protein
TraesCS7B02G342400	cDEG	12	27	21	6	77.7778	AT1G06620		1-aminocyclopropane-1-carboxylate oxidase homolog 1	LOC_Os08g30210	1-aminocyclopropane-1-carboxylate oxidase homolog 1
TraesCS7D02G432800	cDEG	14	27	20	7	74.0741	AT1G06620		1-aminocyclopropane-1-carboxylate oxidase homolog 1	LOC_Os08g30100	1-aminocyclopropane-1-carboxylate oxidase homolog 1
TraesCS4B02G172700	cDEG	12	27	25	2	92.5926	AT1G09780	PGM1	2%2C3-bisphosphoglycerate-independent phosphoglycerate mutase 1	LOC_Os03g21260	2
TraesCS2B02G413000	cDEG	13	27	15	12	55.5556	AT5G24530	DMR6	2-oxoglutarate (2OG) and Fe(II)-dependent oxygenase superfamily protein	LOC_Os04g49194	naringenin
TraesCS2D02G150400	cDEG	13	27	22	5	81.4815	AT3G21240	4CL2	4-coumarate--CoA ligase 2	LOC_Os08g34790	AMP-binding domain containing protein
TraesCS5B02G375900	cDEG	13	27	21	6	77.7778	AT3G14440	NCED3	9-cis-epoxycarotenoid dioxygenase NCED3%2C chloroplastic	LOC_Os03g44380	9-cis-epoxycarotenoid dioxygenase 1
TraesCS5B02G003700	cDEG	13	27	21	6	77.7778	AT5G40010	AATP1	AAA-ATPase 1	LOC_Os12g24320	ATPase 3
TraesCS3D02G257900	cDEG	14	27	24	3	88.8889	AT3G28380	ABCB17	ABC transporter B family member 17	LOC_Os01g50100	ABC transporter
TraesCS3A02G257500	cDEG	13	27	24	3	88.8889	AT2G47000	ABCB4	ABC transporter B family member 4	LOC_Os01g50160	MDR-like ABC transporter
TraesCS7D02G114200	cDEG	12	27	25	2	92.5926	AT3G59140	ABCC10	ABC transporter C family member 10	LOC_Os01g67580	multidrug resistance-associated protein
TraesCS5D02G452500	cDEG	13	27	22	5	81.4815	AT2G36380	ABCG34	ABC transporter G family member 34	LOC_Os11g37700	pleiotropic drug resistance protein
TraesCS7A02G391100	cDEG	13	27	22	5	81.4815	AT1G15520	ABCG40	ABC transporter G family member 40	LOC_Os01g52560	Plant PDR ABC transporter associated domain containing protein
TraesCS7B02G292700	cDEG	12	27	18	9	66.6667	AT1G15520	ABCG40	ABC transporter G family member 40	LOC_Os01g42410	pleiotropic drug resistance protein
TraesCS4A02G485900	cDEG	11	27	15	12	55.5556	AT1G62660	BFRUCT3	Acid beta-fructofuranosidase 3%2C vacuolar	LOC_Os02g01590	glycosyl hydrolases
TraesCS6A02G023200	cDEG	13	27	11	16	40.7407	AT1G62660	BFRUCT3	Acid beta-fructofuranosidase 3%2C vacuolar	LOC_Os02g01590	glycosyl hydrolases
TraesCS7D02G008800	cDEG	14	27	21	6	77.7778	AT1G62660	BFRUCT3	Acid beta-fructofuranosidase 3%2C vacuolar	LOC_Os02g01590	glycosyl hydrolases
TraesCS7B02G455700	cDEG	11	27	25	2	92.5926	AT1G08065	ACA5	Alpha carbonic anhydrase 5	LOC_Os08g36630	bifunctional monodehydroascorbate reductase and carbonic anhydrasenectarin-3 precursor
TraesCS4B02G293900	cDEG	12	27	6	21	22.2222	AT5G21950		alpha/beta-Hydrolases superfamily protein	LOC_Os03g08100	hydrolase
TraesCS5B02G132500	cDEG	13	27	12	15	44.4444	AT4G11000		Ankyrin repeat family protein	LOC_Os11g04830	embryogenesis transmembrane protein
TraesCS7D02G219200	mDEG	10	27	22	5	81.4815	AT4G11000		Ankyrin repeat family protein	LOC_Os06g18990	embryogenesis transmembrane protein
TraesCS7A02G331300	cDEG	12	27	4	23	14.8148	AT3G16240	TIP2-1	Aquaporin TIP2-1	LOC_Os06g22960	aquaporin protein
TraesCS7A02G343600	cDEG	15	27	8	19	29.6296	AT2G46330	AGP16	Arabinogalactan peptide 16	LOC_Os02g16500	expressed protein
TraesCS2A02G291900	cDEG	11	27	17	10	62.963	AT1G08250	ADT6	Arogenate dehydratase/prephenate dehydratase 6%2C chloroplastic	LOC_Os04g33390	prephenate dehydratase domain containing protein
TraesCS7D02G028100	cDEG	11	27	26	1	96.2963	AT1G70980	SYNC3	Asparagine--tRNA ligase%2C cytoplasmic 3	LOC_Os01g27520	tRNA synthetases class II domain containing protein
TraesCS5B02G356700	cDEG	14	27	16	11	59.2593	AT5G65980		Auxin efflux carrier family protein	LOC_Os09g38130	auxin efflux carrier component
TraesCS1D02G218000	cDEG	14	27	10	17	37.037	AT4G17090	BAM3	Beta-amylase 3%2C chloroplastic	LOC_Os10g41550	beta-amylase
TraesCS3B02G441800	cDEG	12	27	3	24	11.1111	AT1G21460	SWEET1	Bidirectional sugar transporter SWEET1	LOC_Os01g65880	nodulin MtN3 family protein
TraesCS4B02G367400	cDEG	15	27	5	22	18.5185	AT2G45180		Bifunctional inhibitor/lipid-transfer protein/seed storage 2S albumin superfamily protein	LOC_Os03g01320	LTPL116 - Protease inhibitor/seed storage/LTP family protein precursor
TraesCS4D02G236800	cDEG	14	27	16	11	59.2593	AT3G49680	BCAT3	Branched-chain-amino-acid aminotransferase 3%2C chloroplastic	LOC_Os03g12890	aminotransferase domain containing protein
TraesCS5B02G260200	cDEG	12	27	14	13	51.8519	AT2G44310		Calcium-binding EF-hand family protein	LOC_Os09g31000	EF hand family protein
TraesCS6A02G419900	cDEG	13	27	24	3	88.8889	AT5G13000	CALS3	Callose synthase 3	LOC_Os06g51270	1
TraesCS5B02G181500	cDEG	12	27	18	9	66.6667	AT4G25790		CAP (Cysteine-rich secretory proteins%2C Antigen 5%2C and Pathogenesis-related 1 protein) superfamily protein	LOC_Os01g28500	SCP-like extracellular protein
TraesCS5D02G446800	cDEG	12	27	21	6	77.7778	AT5G57625		CAP (Cysteine-rich secretory proteins%2C Antigen 5%2C and Pathogenesis-related 1 protein) superfamily protein	LOC_Os07g03710	SCP-like extracellular protein
TraesCS5A02G082700	cDEG	13	27	24	3	88.8889	AT3G55390		CASP-like protein 4C1	LOC_Os12g38100	membrane associated DUF588 domain containing protein
TraesCS6B02G056800	cDEG	12	27	26	1	96.2963	AT4G35090	CAT2	Catalase-2	LOC_Os02g02400	catalase isozyme A
TraesCS1A02G340100	cDEG	12	27	23	4	85.1852	AT1G74310	CLPB1	Chaperone protein ClpB1	LOC_Os05g44340	heat shock protein 101
TraesCS3D02G232500	cDEG	12	27	17	10	62.963	AT3G49340		Cysteine proteinases superfamily protein	LOC_Os01g42780	cysteine proteinase EP-B 2 precursor
TraesCS2A02G493400	cDEG	12	27	23	4	85.1852	AT2G16050		Cysteine/Histidine-rich C1 domain family protein	LOC_Os08g31170	DC1 domain-containing protein
TraesCS3D02G040700	mDEG	10	27	26	1	96.2963	AT4G23180	CRK10	Cysteine-rich receptor-like protein kinase 10	LOC_Os10g04720	TKL_IRAK_DUF26-la.5 - DUF26 kinases have homology to DUF26 containing loci
TraesCS3B02G112300	cDEG	13	27	24	3	88.8889	AT1G70520	CRK2	Cysteine-rich receptor-like protein kinase 2	LOC_Os01g36790	TKL_IRAK_DUF26-lf.2 - DUF26 kinases have homology to DUF26 containing loci
TraesCS5B02G485200	cDEG	15	27	22	5	81.4815	AT3G48280	CYP71A25	Cytochrome P450 71A25	LOC_Os08g01490	cytochrome P450
TraesCS6A02G097400	cDEG	13	27	26	1	96.2963	AT1G13080	CYP71B2	Cytochrome P450 71B2	LOC_Os12g16720	cytochrome P450 71A1
TraesCS7D02G080400	cDEG	13	27	20	7	74.0741	AT3G26210	CYP71B23	Cytochrome P450 71B23	LOC_Os12g32850	cytochrome P450
TraesCS5B02G060200	cDEG	14	27	12	15	44.4444	AT3G26330	CYP71B37	Cytochrome P450 71B37	LOC_Os03g39650	cytochrome P450
TraesCS3A02G532600	cDEG	11	27	25	2	92.5926	AT3G14690	CYP72A15	Cytochrome P450 72A15	LOC_Os01g43774	cytochrome P450 72A1
TraesCS2A02G490500	cDEG	13	27	14	13	51.8519	AT2G45570	CYP76C2	Cytochrome P450 76C2	LOC_Os06g19070	cytochrome P450
TraesCS1D02G048300	cDEG	13	27	21	6	77.7778	AT2G45580	CYP76C3	Cytochrome P450 76C3	LOC_Os10g05490	cytochrome P450
TraesCS2D02G026000	cDEG	15	27	6	21	22.2222	AT1G64900	CYP89A2	Cytochrome P450 89A2	LOC_Os04g03870	cytochrome P450
TraesCS2A02G534600	cDEG	14	27	23	4	85.1852	AT4G37330	CYP81D4	cytochrome P450%2C family 81%2C subfamily D%2C polypeptide 4	LOC_Os03g55240	cytochrome P450
TraesCS5D02G407400	cDEG	13	27	24	3	88.8889	AT4G37330	CYP81D4	cytochrome P450%2C family 81%2C subfamily D%2C polypeptide 4	LOC_Os03g55240	cytochrome P450
TraesCS3A02G481000	cDEG	13	27	20	7	74.0741	AT2G41510	CKX1	Cytokinin dehydrogenase 1	LOC_Os01g71310	cytokinin dehydrogenase precursor
TraesCS4A02G431400	cDEG	12	27	25	2	92.5926	AT4G38700	DIR15	Dirigent protein 15	LOC_Os12g09700	Jacalin-like lectin domain containing protein
TraesCS5D02G129400	cDEG	14	27	21	6	77.7778	AT5G50080	ERF110	Ethylene-responsive transcription factor ERF110	LOC_Os11g06770	ethylene-responsive transcription factor ERF110
TraesCS3A02G471700	cDEG	13	27	25	2	92.5926	AT1G03230		Eukaryotic aspartyl protease family protein	LOC_Os01g71090	xylanase inhibitor
TraesCS3A02G344800	cDEG	14	27	14	13	51.8519	AT1G69530	EXPA1	Expansin-A1	LOC_Os01g60770	expansin precursor
TraesCS7D02G532500	cDEG	13	27	20	7	74.0741	AT4G38400	EXLA2	Expansin-like A2	LOC_Os06g50960	expansin precursor
TraesCS2B02G418200	cDEG	13	27	7	20	25.9259	AT3G61060	PP2A13	F-box protein PP2-A13	LOC_Os04g48270	OsFBX148 - F-box domain containing protein
TraesCS3A02G025300	cDEG	13	27	25	2	92.5926	AT3G26430		GDSL esterase/lipase At3g26430	LOC_Os07g39740	GDSL-like lipase/acylhydrolase
TraesCS3D02G020700	cDEG	13	27	25	2	92.5926	AT3G26430		GDSL esterase/lipase At3g26430	LOC_Os07g39740	GDSL-like lipase/acylhydrolase
TraesCS4B02G377300	cDEG	12	27	19	8	70.3704	AT5G39110	GLP6	Germin-like protein subfamily 1 member 14	LOC_Os08g08990	Cupin domain containing protein
TraesCS4B02G378000	cDEG	13	27	22	5	81.4815	AT5G39110	GLP6	Germin-like protein subfamily 1 member 14	LOC_Os08g08990	Cupin domain containing protein
TraesCSU02G127900	cDEG	12	27	23	4	85.1852	AT5G39110	GLP6	Germin-like protein subfamily 1 member 14	LOC_Os08g08990	Cupin domain containing protein
TraesCS5D02G054300	cDEG	13	27	24	3	88.8889	AT5G39120		Germin-like protein subfamily 1 member 15	LOC_Os08g08980	cupin domain containing protein
TraesCS7A02G386800	cDEG	13	27	26	1	96.2963	AT5G39150		Germin-like protein subfamily 1 member 17	LOC_Os08g08980	cupin domain containing protein
TraesCS3B02G282400	cDEG	13	27	17	10	62.963	AT1G18980		Germin-like protein subfamily T member 2	LOC_Os03g48780	Cupin domain containing protein
TraesCS4A02G279200	cDEG	14	27	17	10	62.963	AT1G18980		Germin-like protein subfamily T member 2	LOC_Os03g48780	Cupin domain containing protein
TraesCS4D02G047400	cDEG	13	27	26	1	96.2963	AT1G66200	GLN1-2	Glutamine synthetase cytosolic isozyme 1-2	LOC_Os03g50490	glutamine synthetase
TraesCS4B02G199700	cDEG	14	27	21	6	77.7778	AT5G02790	GSTL3	Glutathione S-transferase L3	LOC_Os03g17480	IN2-1 protein
TraesCS4B02G132100	cDEG	12	27	27	0	100	AT1G34300		G-type lectin S-receptor-like serine/threonine-protein kinase At1g34300	LOC_Os12g07800	S-locus-like receptor protein kinase
TraesCS6D02G280700	cDEG	15	27	21	6	77.7778	AT1G34300		G-type lectin S-receptor-like serine/threonine-protein kinase At1g34300	LOC_Os06g13320	protein kinase
TraesCS3A02G280800	cDEG	12	27	26	1	96.2963	AT3G24520	HSFC1	Heat stress transcription factor C-1	LOC_Os01g53220	HSF-type DNA-binding domain containing protein
TraesCS4B02G383300	cDEG	15	27	25	2	92.5926	AT3G24520	HSFC1	Heat stress transcription factor C-1	LOC_Os02g13800	HSF-type DNA-binding domain containing protein
TraesCS3A02G347400	cDEG	14	27	21	6	77.7778	AT5G05365		Heavy metal transport/detoxification superfamily protein	LOC_Os01g61070	heavy metal-associated domain containing protein
TraesCS3D02G209500	cDEG	13	27	22	5	81.4815	AT1G71050	HIPP20	Heavy metal transport/detoxification superfamily protein	LOC_Os01g32330	heavy metal-associated domain containing protein
TraesCS2B02G582000	cDEG	13	27	25	2	92.5926	AT3G04720	HEL	Hevein-like preproprotein	LOC_Os11g37950	WIP3 - Wound-induced protein precursor
TraesCS7D02G477300	cDEG	13	27	6	21	22.2222	AT5G22880	H2B	Histone H2B.10	LOC_Os01g05610	Core histone H2A/H2B/H3/H4 domain containing protein
TraesCS1D02G286700	cDEG	13	27	5	22	18.5185	AT1G07660		Histone H4	LOC_Os05g39050	Core histone H2A/H2B/H3/H4 domain containing protein
TraesCS7A02G470100	cDEG	13	27	23	4	85.1852	AT2G40260		Homeodomain-like superfamily protein	LOC_Os06g45890	MYB family transcription factor
TraesCS2B02G369100	cDEG	12	27	22	5	81.4815	AT3G54420	ATEP3	homolog of carrot EP3-3 chitinase	LOC_Os04g41680	CHIT3 - Chitinase family protein precursor
TraesCS1A02G173800	cDEG	13	27	21	6	77.7778	AT5G17540		HXXXD-type acyl-transferase family protein	LOC_Os10g35950	transferase family protein
TraesCS1D02G278100	cDEG	12	27	17	10	62.963	AT5G01210		HXXXD-type acyl-transferase family protein	LOC_Os05g37660	transferase family protein
TraesCS2B02G118700	cDEG	12	27	25	2	92.5926	AT2G39050		hydroxyproline-rich glycoprotein family protein	LOC_Os07g48460	stress responsive protein
TraesCS1B02G436500	cDEG	13	27	26	1	96.2963	AT4G22220	ISU1	Iron-sulfur cluster assembly protein 1	LOC_Os05g49300	iron-sulfur cluster assembly enzyme ISCU
TraesCS1A02G325500	cDEG	15	27	17	10	62.963	AT1G19715	JAL3	Jacalin-related lectin 3	LOC_Os05g43240	jacalin-like lectin domain containing protein
TraesCS3D02G310300	mDEG	10	27	19	8	70.3704	AT1G19715	JAL3	Jacalin-related lectin 3	LOC_Os05g43240	jacalin-like lectin domain containing protein
TraesCS1B02G381500	cDEG	12	27	27	0	100	AT1G52690		Late embryogenesis abundant protein (LEA) family protein	LOC_Os05g46480	late embryogenesis abundant protein
TraesCS1D02G369200	cDEG	12	27	25	2	92.5926	AT3G15670		Late embryogenesis abundant protein (LEA) family protein	LOC_Os05g46480	late embryogenesis abundant protein
TraesCS7D02G244800	cDEG	13	27	20	7	74.0741	AT3G45140	LOX2	Lipoxygenase 2%2C chloroplastic	LOC_Os08g39850	lipoxygenase
TraesCS3A02G046100	cDEG	15	27	15	12	55.5556				LOC_Os01g03380	BBTI6 - Bowman-Birk type bran trypsin inhibitor precursor
TraesCS6A02G099000	cDEG	13	27	13	14	48.1481				LOC_Os02g04130	DUF1645 domain containing protein
TraesCS6A02G241700	cDEG	13	27	21	6	77.7778				LOC_Os02g43540	retrotransposon protein
TraesCS5B02G191400	cDEG	14	27	19	8	70.3704				LOC_Os09g19970	expressed protein
TraesCS7B02G256000	cDEG	14	27	23	4	85.1852				LOC_Os10g28080	glycosyl hydrolase
TraesCS7D02G351300	cDEG	13	27	24	3	88.8889				LOC_Os10g28080	glycosyl hydrolase
TraesCS5A02G424800	cDEG	12	27	25	2	92.5926				LOC_Os11g26780	dehydrin
TraesCS5D02G379300	cDEG	13	27	26	1	96.2963				LOC_Os11g26790	dehydrin
TraesCS4A02G107100	cDEG	13	27	23	4	85.1852	AT2G38905		Low temperature and salt responsive protein family	LOC_Os03g17790	OsRCI2-5 - Putative low temperature and salt responsive protein
TraesCS5A02G081600	cDEG	13	27	23	4	85.1852	AT3G55550	LECRKS4	L-type lectin-domain containing receptor kinase S.4	LOC_Os12g38610	lectin-like receptor kinase
TraesCS6B02G376200	cDEG	12	27	23	4	85.1852	AT4G33150	LKR/SDH	lysine-ketoglutarate reductase/saccharopine dehydrogenase bifunctional enzyme	LOC_Os02g54254	saccharopine dehydrogenase
TraesCS6D02G233800	cDEG	13	27	8	19	29.6296	AT2G16990		Major facilitator superfamily protein	LOC_Os02g44730	tetracycline transporter protein
TraesCS4A02G245400	cDEG	13	27	24	3	88.8889	AT3G26590		MATE efflux family protein	LOC_Os03g42830	MATE efflux family protein
TraesCS1B02G294300	cDEG	13	27	23	4	85.1852	AT5G42020	MED37F	Mediator of RNA polymerase II transcription subunit 37f	LOC_Os11g08460	DnaK family protein
TraesCS4D02G358800	cDEG	14	27	3	24	11.1111	AT1G02170	AMC1	Metacaspase-1	LOC_Os03g27120	ICE-like protease p20 domain containing protein
TraesCS5D02G065100	cDEG	14	27	11	16	40.7407	AT1G03090	MCCA	Methylcrotonoyl-CoA carboxylase subunit alpha%2C mitochondrial	LOC_Os12g41250	methylcrotonoyl-CoA carboxylase subunit alpha
TraesCS2B02G524500	cDEG	13	27	26	1	96.2963	AT1G80310	MOT2	Molybdate transporter 2	LOC_Os01g45830	sulfate transporter
TraesCS1D02G162800	cDEG	12	27	2	25	7.40741	AT4G12420	SKU5	Monocopper oxidase-like protein SKU5	LOC_Os10g36390	monocopper oxidase
TraesCS6B02G257300	cDEG	12	27	12	15	44.4444	AT3G23250	MYB15	myb domain protein 15	LOC_Os02g41510	MYB family transcription factor
TraesCS6D02G249200	cDEG	13	27	25	2	92.5926	AT1G79180	ATMYB63	myb domain protein 63	LOC_Os02g46780	MYB family transcription factor
TraesCS5D02G148800	cDEG	13	27	25	2	92.5926	AT3G15510	ATNAC2	NAC domain containing protein 2	LOC_Os11g03300	NAC domain transcription factor
TraesCS5A02G268200	cDEG	12	27	2	25	7.40741	AT1G76470		NAD(P)-binding Rossmann-fold superfamily protein	LOC_Os09g31490	reductase
TraesCS3A02G275600	cDEG	12	27	27	0	100	AT2G19900	NADP-ME1	NADP-dependent malic enzyme 1	LOC_Os01g52500	NADP-dependent malic enzyme
TraesCS7D02G273100	cDEG	15	27	23	4	85.1852	AT2G17730	NIP2	NEP1-interacting protein 2	LOC_Os08g43670	RING-H2 finger protein ATL2B
TraesCS6A02G326200	cDEG	15	27	9	18	33.3333	AT1G77760	NIA1	Nitrate reductase	LOC_Os02g53130	nitrate reductase
TraesCS5D02G387000	cDEG	12	27	25	2	92.5926	AT3G13050	2025-10-07	Organic cation/carnitine transporter 7	LOC_Os03g43720	transporter family protein
TraesCS5A02G375000	cDEG	12	27	24	3	88.8889	AT5G46180	DELTA-OAT	Ornithine aminotransferase%2C mitochondrial	LOC_Os03g44150	aminotransferase
TraesCS2D02G391700	cDEG	11	27	12	15	44.4444	AT5G56550	OXS3	oxidative stress 3	LOC_Os04g49370	expressed protein
TraesCS7A02G466800	cDEG	13	27	4	23	14.8148	AT1G30690	PATL4	Patellin-4	LOC_Os06g45990	patellin-5
TraesCS6A02G005100	cDEG	11	27	25	2	92.5926	AT1G78780		pathogenesis-related family protein	LOC_Os01g14590	pathogen-related protein
TraesCS3D02G305400	cDEG	13	27	21	6	77.7778	AT4G33420	PER47	Peroxidase 47	LOC_Os07g44499	peroxidase
TraesCS4D02G116600	cDEG	12	27	24	3	88.8889	AT5G05340	PER52	Peroxidase 52	LOC_Os11g02130	peroxidase precursor
TraesCS7B02G274200	cDEG	12	27	4	23	14.8148	AT5G05340	PER52	Peroxidase 52	LOC_Os06g35520	peroxidase precursor
TraesCS2B02G554900	cDEG	15	27	23	4	85.1852	AT3G29670	PMAT2	Phenolic glucoside malonyltransferase 2	LOC_Os04g54560	transferase family protein
TraesCS1B02G048300	cDEG	12	27	16	11	59.2593	AT2G37040	PAL1	Phenylalanine ammonia-lyase 1	LOC_Os04g43800	phenylalanine ammonia-lyase
TraesCS1B02G122800	cDEG	13	27	13	14	48.1481	AT2G37040	PAL1	Phenylalanine ammonia-lyase 1	LOC_Os04g43800	phenylalanine ammonia-lyase
TraesCS2B02G224300	cDEG	13	27	12	15	44.4444	AT2G37040	PAL1	Phenylalanine ammonia-lyase 1	LOC_Os04g43800	phenylalanine ammonia-lyase
TraesCS2D02G204700	cDEG	12	27	11	16	40.7407	AT2G37040	PAL1	Phenylalanine ammonia-lyase 1	LOC_Os04g43800	phenylalanine ammonia-lyase
TraesCS2D02G218700	cDEG	14	27	12	15	44.4444	AT2G37040	PAL1	Phenylalanine ammonia-lyase 1	LOC_Os04g43800	phenylalanine ammonia-lyase
TraesCS4B02G059200	cDEG	12	27	26	1	96.2963	AT3G07960	PIP5K6	Phosphatidylinositol 4-phosphate 5-kinase 6	LOC_Os07g46490	phosphatidylinositol-4-phosphate 5-kinase
TraesCS7D02G531300	cDEG	13	27	1	26	3.7037	AT3G15730	PLDALPHA1	Phospholipase D alpha 1	LOC_Os06g40170	phospholipase D
TraesCS2D02G201200	cDEG	13	27	14	13	51.8519	AT2G44260		Plant protein of unknown function (DUF946)	LOC_Os07g38840	expressed protein
TraesCS6B02G280400	cDEG	14	27	4	23	14.8148	AT1G02640	BXL2	Probable beta-D-xylosidase 2	LOC_Os01g19220	beta-D-xylosidase
TraesCS5A02G229000	cDEG	15	27	17	10	62.963	AT3G29000	CML30	Probable calcium-binding protein CML30	LOC_Os09g24580	EF hand family protein
TraesCS1A02G257000	cDEG	12	27	22	5	81.4815	AT5G06570	CXE15	Probable carboxylesterase 15	LOC_Os05g33940	alpha/beta hydrolase fold
TraesCS5D02G472000	cDEG	12	27	23	4	85.1852	AT5G43370	PHT1-2	Probable inorganic phosphate transporter 1-2	LOC_Os10g30770	inorganic phosphate transporter
TraesCS2B02G538600	cDEG	13	27	9	18	33.3333	AT3G16150		Probable isoaspartyl peptidase/L-asparaginase 2	LOC_Os04g55710	transposon protein
TraesCS2D02G511800	cDEG	14	27	9	18	33.3333	AT3G16150		Probable isoaspartyl peptidase/L-asparaginase 2	LOC_Os04g55710	transposon protein
TraesCS6A02G184500	cDEG	13	27	23	4	85.1852	AT3G01270		Probable pectate lyase 7	LOC_Os02g12300	pectate lyase precursor
TraesCS7D02G506800	cDEG	13	27	27	0	100	AT1G67300		Probable plastidic glucose transporter 2	LOC_Os02g17500	transporter family protein
TraesCS5D02G329100	cDEG	14	27	16	11	59.2593	AT5G47070		Probable receptor-like protein kinase At5g47070	LOC_Os09g36320	tyrosine protein kinase domain containing protein
TraesCS5D02G232800	cDEG	13	27	22	5	81.4815	AT1G80840	WRKY40	Probable WRKY transcription factor 40	LOC_Os09g25060	WRKY76
TraesCS6D02G136200	cDEG	13	27	12	15	44.4444	AT1G80840	WRKY40	Probable WRKY transcription factor 40	LOC_Os02g08440	WRKY71
TraesCS7D02G497800	cDEG	15	27	12	15	44.4444	AT1G80840	WRKY40	Probable WRKY transcription factor 40	LOC_Os06g44010	WRKY28
TraesCS2B02G517400	cDEG	12	27	20	7	74.0741	AT3G56400	WRKY70	Probable WRKY transcription factor 70	LOC_Os05g25770	WRKY45
TraesCS7B02G327400	cDEG	14	27	25	2	92.5926	AT4G25810	XTH23	Probable xyloglucan endotransglucosylase/hydrolase protein 23	LOC_Os06g48180	glycosyl hydrolases family 16
TraesCS3B02G449100	cDEG	17	27	7	20	25.9259	AT2G39890	PROT1	Proline transporter 1	LOC_Os01g68050	transmembrane amino acid transporter protein
TraesCS5D02G148900	cDEG	16	27	21	6	77.7778	AT5G53950	NAC098	Protein CUP-SHAPED COTYLEDON 2	LOC_Os12g03050	no apical meristem protein
TraesCS5B02G002100	cDEG	13	27	21	6	77.7778	AT5G22090		Protein FAF-like%2C chloroplastic	LOC_Os03g49830	expressed protein
TraesCS7D02G485300	cDEG	14	27	23	4	85.1852	AT5G57685	GDU3	Protein GLUTAMINE DUMPER 3	LOC_Os06g44420	GDU1
TraesCS3D02G454200	cDEG	12	27	2	25	7.40741	AT3G26700		Protein kinase superfamily protein	LOC_Os01g70970	protein kinase
TraesCS5B02G208200	cDEG	12	27	21	6	77.7778	AT2G05940		Protein kinase superfamily protein	LOC_Os09g27010	tyrosine protein kinase domain containing protein
TraesCS6A02G280200	cDEG	13	27	19	8	70.3704	AT1G32450	NPF7.3	Protein NRT1/ PTR FAMILY 7.3	LOC_Os02g48570	peptide transporter PTR2
TraesCS3D02G268900	cDEG	14	27	11	16	40.7407	AT4G21700		Protein of unknown function (DUF2921)	LOC_Os01g48620	expressed protein
TraesCS3D02G273300	cDEG	16	27	2	25	7.40741	AT4G32480		Protein of unknown function (DUF506)	LOC_Os01g54340	plant-specific domain TIGR01615 family protein
TraesCS2B02G103000	cDEG	13	27	2	25	7.40741	AT5G45470		Protein of unknown function (DUF594)	LOC_Os01g23070	expressed protein
TraesCS2A02G380100	cDEG	12	27	14	13	51.8519	AT5G60680		Protein of unknown function%2C DUF584	LOC_Os04g43990	DUF584 domain containing protein
TraesCS3A02G265400	cDEG	12	27	27	0	100	AT3G18215		Protein of unknown function%2C DUF599	LOC_Os02g19060	expressed protein
TraesCS3A02G249000	cDEG	13	27	25	2	92.5926	AT1G72770	HAB1	Protein phosphatase 2C 16	LOC_Os05g46040	protein phosphatase 2C
TraesCS5D02G219300	cDEG	14	27	17	10	62.963	AT1G74950	TIFY10B	Protein TIFY 10B	LOC_Os09g26780	zinc-finger protein
TraesCS2D02G438300	cDEG	14	27	14	13	51.8519	AT5G48485	DIR1	Putative lipid-transfer protein DIR1	LOC_Os07g18990	LTPL40 - Protease inhibitor/seed storage/LTP family protein precursor
TraesCS7B02G103800	cDEG	15	27	26	1	96.2963	AT1G24180	IAR4	Pyruvate dehydrogenase E1 component subunit alpha-2%2C mitochondrial	LOC_Os06g13720	dehydrogenase E1 component domain containing protein
TraesCS4A02G407500	cDEG	13	27	24	3	88.8889	AT2G44610	RABH1B	Ras-related protein RABH1b	LOC_Os03g09140	ras-related protein
TraesCS5D02G188700	cDEG	11	27	25	2	92.5926	AT1G28440	HSL1	Receptor-like protein kinase HSL1	LOC_Os09g15700	receptor-like protein kinase 5 precursor
TraesCS4A02G053800	cDEG	13	27	25	2	92.5926	AT5G61280		Remorin family protein	LOC_Os03g11300	expressed protein
TraesCS7D02G531600	cDEG	14	27	7	20	25.9259	AT4G35770	STR15	Rhodanese-like domain-containing protein 15%2C chloroplastic	LOC_Os06g50930	rhodanese-like domain containing protein
TraesCS5D02G169900	cDEG	13	27	6	21	22.2222	AT1G67090	RBCS-1A	Ribulose bisphosphate carboxylase small chain 1A%2C chloroplastic	LOC_Os12g19470	ribulose bisphosphate carboxylase small chain
TraesCS7B02G061100	cDEG	13	27	14	13	51.8519	AT1G53820	ATL60	RING-H2 finger protein ATL60	LOC_Os06g09310	zinc finger
TraesCS4B02G070000	cDEG	13	27	25	2	92.5926	AT1G12950	RSH2	root hair specific 2	LOC_Os03g42830	MATE efflux family protein
TraesCS3B02G275600	cDEG	12	27	21	6	77.7778	AT5G10830		S-adenosyl-L-methionine-dependent methyltransferases superfamily protein	LOC_Os01g51870	methyltransferase
TraesCS7A02G173000	cDEG	14	27	18	9	66.6667	AT1G07530	SCL14	Scarecrow-like protein 14	LOC_Os11g47870	GRAS family transcription factor domain containing protein
TraesCS3B02G457600	cDEG	13	27	20	7	74.0741	AT4G14030	SBP1	Selenium-binding protein 1	LOC_Os01g68770	selenium-binding protein
TraesCS3B02G359400	cDEG	13	27	26	1	96.2963	AT5G09640	SCPL19	Serine carboxypeptidase-like 19	LOC_Os11g24510	OsSCP56 - Putative Serine Carboxypeptidase homologue
TraesCS5A02G307200	cDEG	13	27	25	2	92.5926	AT1G73270	SCPL6	Serine carboxypeptidase-like 6	LOC_Os10g01134	OsSCP46 - Putative Serine Carboxypeptidase homologue
TraesCS2D02G165600	cDEG	12	27	20	7	74.0741	AT2G38900		Serine protease inhibitor%2C potato inhibitor I-type family protein	LOC_Os01g42860	inhibitor I family protein
TraesCS6D02G241700	cDEG	12	27	21	6	77.7778	AT5G48930	HST	Shikimate O-hydroxycinnamoyltransferase	LOC_Os08g43040	transferase family protein
TraesCS3D02G224700	cDEG	13	27	26	1	96.2963	AT3G48530	KING1	SNF1-related protein kinase regulatory subunit gamma-1	LOC_Os01g44250	CBS domain containing membrane protein
TraesCS3B02G356700	cDEG	13	27	21	6	77.7778	AT4G10540		Subtilase family protein	LOC_Os01g58290	OsSub9 - Putative Subtilisin homologue
TraesCS6D02G008300	cDEG	14	27	19	8	70.3704	AT5G66170	STR18	Thiosulfate sulfurtransferase 18	LOC_Os12g24020	rhodanese-like domain containing protein
TraesCS5B02G261800	cDEG	15	27	5	22	18.5185	AT5G47560	TDT	Tonoplast dicarboxylate transporter	LOC_Os09g31130	citrate transporter
TraesCS3B02G375100	cDEG	14	27	26	1	96.2963	AT2G30490	CYP73A5	Trans-cinnamate 4-monooxygenase	LOC_Os01g60450	cytochrome P450
TraesCS5A02G237500	cDEG	12	27	17	10	62.963	AT3G50330	HEC2	Transcription factor HEC2	LOC_Os09g28210	bHelix-loop-helix transcription factor
TraesCS3B02G181200	cDEG	12	27	24	3	88.8889	AT3G06880		Transducin/WD40 repeat-like superfamily protein	LOC_Os01g12930	U-box domain containing protein
TraesCS4A02G242800	cDEG	13	27	18	9	66.6667	AT4G34380		Transducin/WD40 repeat-like superfamily protein	LOC_Os03g42710	WD-40 repeat family protein
TraesCS4B02G211500	cDEG	12	27	19	8	70.3704	AT1G78070		Transducin/WD40 repeat-like superfamily protein	LOC_Os03g26870	WD-40 repeat family protein
TraesCS1D02G186500	cDEG	12	27	27	0	100	AT4G24040	TRE1	Trehalase	LOC_Os10g37660	trehalase precursor
TraesCS4D02G015400	cDEG	13	27	3	24	11.1111	AT5G23860	TUBB8	Tubulin beta-8 chain	LOC_Os01g18050	tubulin/FtsZ domain containing protein
TraesCS1D02G073000	cDEG	14	27	25	2	92.5926	AT5G36160	TAT	Tyrosine aminotransferase	LOC_Os11g35040	aminotransferase
TraesCS3D02G305600	cDEG	12	27	10	17	37.037	AT2G20340	ELI5	Tyrosine decarboxylase 1	LOC_Os01g56380	decarboxylase
TraesCS3B02G422300	cDEG	12	27	5	22	18.5185	AT5G14360		Ubiquitin-like superfamily protein	LOC_Os01g67950	ubiquitin family protein
TraesCS3D02G382600	cDEG	12	27	1	26	3.7037	AT5G14360		Ubiquitin-like superfamily protein	LOC_Os01g67950	ubiquitin family protein
TraesCS5D02G204700	cDEG	14	27	22	5	81.4815	AT1G60190	PUB19	U-box domain-containing protein 19	LOC_Os09g21120	armadillo/beta-catenin repeat family protein
TraesCS7B02G105600	cDEG	13	27	15	12	55.5556	AT5G37490	PUB21	U-box domain-containing protein 21	LOC_Os06g13870	U-box protein CMPG1
TraesCS2A02G541900	cDEG	13	27	18	9	66.6667	AT2G32300	UCC1	uclacyanin 1	LOC_Os08g04340	plastocyanin-like domain containing protein
TraesCS4B02G271800	cDEG	14	27	20	7	74.0741	AT2G32300	UCC1	uclacyanin 1	LOC_Os09g39940	plastocyanin-like domain containing protein
TraesCS6A02G297500	cDEG	14	27	25	2	92.5926	AT2G32300	UCC1	uclacyanin 1	LOC_Os09g29390	plastocyanin-like domain containing protein
TraesCS5B02G436500	cDEG	15	27	19	8	70.3704	AT2G15480	UGT73B5	UDP-glycosyltransferase 73B5	LOC_Os01g45110	anthocyanin 3-O-beta-glucosyltransferase
TraesCS2B02G395000	cDEG	12	27	20	7	74.0741	AT3G53160	UGT73C7	UDP-glycosyltransferase 73C7	LOC_Os04g44250	cytokinin-O-glucosyltransferase 3
TraesCS5D02G143300	cDEG	14	27	23	4	85.1852	AT1G05680	UGT74E2	UDP-glycosyltransferase 74E2	LOC_Os04g12970	UDP-glucoronosyl/UDP-glucosyl transferase
TraesCS3A02G118300	cDEG	14	27	20	7	74.0741	AT4G15550	UGT75D1	UDP-glycosyltransferase 75D1	LOC_Os01g08440	UDP-glucoronosyl and UDP-glucosyl transferase domain containing protein
TraesCS5D02G140900	cDEG	14	27	15	12	55.5556	AT4G15550	UGT75D1	UDP-glycosyltransferase 75D1	LOC_Os11g04860	anthocyanin 5-O-glucosyltransferase
TraesCS6A02G018200	cDEG	15	27	23	4	85.1852	AT1G22360	UGT85A2	UDP-glycosyltransferase 85A2	LOC_Os02g51930	cytokinin-O-glucosyltransferase 2
TraesCS6D02G094700	cDEG	13	27	15	12	55.5556	AT1G22380	UGT85A3	UDP-glycosyltransferase 85A3	LOC_Os04g25800	cytokinin-O-glucosyltransferase 2
TraesCS7B02G123100	cDEG	13	27	25	2	92.5926	AT3G16520	UGT88A1	UDP-glycosyltransferase 88A1	LOC_Os06g18140	UDP-glucoronosyl and UDP-glucosyl transferase domain containing protein
TraesCS7D02G212000	cDEG	13	27	27	0	100	AT1G10400	UGT90A2	UDP-glycosyltransferase 90A2	LOC_Os06g16000	UDP-glucoronosyl and UDP-glucosyl transferase
TraesCS7B02G116900	cDEG	11	27	27	0	100	AT5G14860		UDP-Glycosyltransferase superfamily protein	LOC_Os06g16000	UDP-glucoronosyl and UDP-glucosyl transferase
TraesCS3D02G495200	cDEG	14	27	17	10	62.963	AT5G12340		unknown protein%3B BEST Arabidopsis thaliana protein match is: unknown protein (TAIR:AT1G28190.1)%3B Has 30201 Blast hits to 17322 proteins in 780 species: Archae - 12%3B Bacteria - 1396%3B Metazoa - 17338%3B Fungi - 3422%3B Plants - 5037%3B Viruses - 0%3B Other Eu /.../es - 2996 (source: NCBI BLink).	LOC_Os01g72360	expressed protein
TraesCS2B02G300300	cDEG	14	27	24	3	88.8889	AT1G27990		unknown protein%3B BEST Arabidopsis thaliana protein match is: unknown protein (TAIR:AT5G52420.1)%3B Has 86 Blast hits to 86 proteins in 15 species: Archae - 0%3B Bacteria - 0%3B Metazoa - 0%3B Fungi - 0%3B Plants - 84%3B Viruses - 0%3B Other Eukaryotes - 2 (source /.../ BLink).	LOC_Os04g31710	expressed protein
TraesCS3B02G324700	cDEG	13	27	0	27	0	AT5G11500		unknown protein%3B CONTAINS InterPro DOMAIN/s: Protein of unknown function DUF814 (InterPro:IPR008532)%3B Has 1807 Blast hits to 1807 proteins in 277 species: Archae - 0%3B Bacteria - 0%3B Metazoa - 736%3B Fungi - 347%3B Plants - 385%3B Viruses - 0%3B Other Eukaryo /.../339 (source: NCBI BLink).	LOC_Os01g54670	coiled-coil domain-containing protein 25
TraesCS5B02G230800	cDEG	12	27	7	20	25.9259	AT1G05575		unknown protein%3B FUNCTIONS IN: molecular_function unknown%3B INVOLVED IN: anaerobic respiration%3B LOCATED IN: endomembrane system%3B EXPRESSED IN: 17 plant structures%3B EXPRESSED DURING: 9 growth stages%3B BEST Arabidopsis thaliana protein match is: unknown /.../in (TAIR:AT2G31945.1)%3B Has 63 Blast hits to 63 proteins in 10 species: Archae - 0%3B Bacteria - 0%3B Metazoa - 0%3B Fungi - 0%3B P…	LOC_Os09g27410	expressed protein
TraesCS1B02G136800	cDEG	12	27	3	24	11.1111	AT3G15630		unknown protein%3B FUNCTIONS IN: molecular_function unknown%3B INVOLVED IN: biological_process unknown%3B LOCATED IN: chloroplast%3B EXPRESSED IN: 24 plant structures%3B EXPRESSED DURING: 15 growth stages%3B BEST Arabidopsis thaliana protein match is: unknown p /.../ (TAIR:AT1G52720.1)%3B Has 61 Blast hits to 61 proteins in 13 species: Archae - 0%3B Bacteria - 0%3B Metazoa - 0%3B Fungi - 0%3B Pla…	LOC_Os05g08420	expressed protein
TraesCS1A02G416700	cDEG	11	27	21	6	77.7778	AT3G10020		unknown protein%3B FUNCTIONS IN: molecular_function unknown%3B INVOLVED IN: response to oxidative stress%2C anaerobic respiration%3B LOCATED IN: cellular_component unknown%3B EXPRESSED IN: 23 plant structures%3B EXPRESSED DURING: 13 growth stages%3B Has 47 Blast /.../o 47 proteins in 12 species: Archae - 0%3B Bacteria - 0%3B Metazoa - 1%3B Fungi - 0%3B Plants - 46%3B Viruses - 0%3B Other Eukaryot…	LOC_Os11g05170	expressed protein
TraesCS3A02G232000	cDEG	13	27	27	0	100	AT3G03341		unknown protein%3B Has 30201 Blast hits to 17322 proteins in 780 species: Archae - 12%3B Bacteria - 1396%3B Metazoa - 17338%3B Fungi - 3422%3B Plants - 5037%3B Viruses - 0%3B Other Eukaryotes - 2996 (source: NCBI BLink).	LOC_Os01g45659	expressed protein
TraesCS3B02G262800	cDEG	12	27	21	6	77.7778	AT2G21820		unknown protein%3B Has 45 Blast hits to 45 proteins in 13 species: Archae - 0%3B Bacteria - 0%3B Metazoa - 0%3B Fungi - 0%3B Plants - 45%3B Viruses - 0%3B Other Eukaryotes - 0 (source: NCBI BLink).	LOC_Os01g46600	seed maturation protein PM41
TraesCS6D02G301800	cDEG	13	27	21	6	77.7778	AT2G31940		unknown protein%3B INVOLVED IN: biological_process unknown%3B LOCATED IN: endomembrane system%3B EXPRESSED IN: 16 plant structures%3B EXPRESSED DURING: 6 growth stages%3B BEST Arabidopsis thaliana protein match is: unknown protein (TAIR:AT5G19875.1)%3B Has 227 /.../hits to 227 proteins in 13 species: Archae - 0%3B Bacteria - 0%3B Metazoa - 0%3B Fungi - 0%3B Plants - 227%3B Viruses - 0%3B Other Eu…	LOC_Os02g53510	oxidoreductase/ transition metal ion binding protein
TraesCS3B02G141500	cDEG	13	27	20	7	74.0741	AT5G02070	WAKL20	Wall-associated receptor kinase-like 20	LOC_Os05g25390	tyrosine protein kinase domain containing protein
TraesCS2B02G117900	cDEG	13	27	25	2	92.5926	AT5G17810	WOX12	WUSCHEL-related homeobox 12	LOC_Os07g48560	homeobox domain containing protein
TraesCS2D02G100200	cDEG	12	27	26	1	96.2963	AT5G17810	WOX12	WUSCHEL-related homeobox 12	LOC_Os07g48560	homeobox domain containing protein
TraesCS5A02G513000	cDEG	13	27	23	4	85.1852	AT5G60710		Zinc finger (C3HC4-type RING finger) family protein	LOC_Os10g32760	zinc finger family protein
TraesCS1A02G276800	cDEG	14	27	22	5	81.4815	AT3G20880	WIP4	Zinc finger protein WIP4	LOC_Os05g37190	ZOS5-08 - C2H2 zinc finger protein
TraesCS1A02G265900	cDEG	11	27	22	5	81.4815				LOC_Os01g04050	BBTI12 - Bowman-Birk type bran trypsin inhibitor precursor
TraesCS1A02G287000	cDEG	14	27	15	12	55.5556				LOC_Os05g38660	expressed protein
TraesCS1D02G265900	cDEG	13	27	25	2	92.5926				LOC_Os01g04050	BBTI12 - Bowman-Birk type bran trypsin inhibitor precursor
TraesCS2B02G278400	cDEG	14	27	21	6	77.7778				LOC_Os07g02460	expressed protein
TraesCS2B02G339500	cDEG	13	27	1	26	3.7037				LOC_Os04g38320	expressed protein
TraesCS3A02G252400	cDEG	13	27	4	23	14.8148
TraesCS3B02G040800	cDEG	11	27	21	6	77.7778				LOC_Os01g03940	expressed protein
TraesCS3B02G451800	mDEG	10	27	26	1	96.2963				LOC_Os01g68300	expressed protein
TraesCS3D02G037900	cDEG	12	27	19	8	70.3704				LOC_Os01g03940	expressed protein
TraesCS3D02G412300	cDEG	11	27	25	2	92.5926				LOC_Os01g68300	expressed protein
TraesCS4A02G005700	cDEG	14	27	7	20	25.9259				LOC_Os01g03380	BBTI6 - Bowman-Birk type bran trypsin inhibitor precursor
TraesCS4A02G121900	cDEG	14	27	24	3	88.8889				LOC_Os03g19540	expressed protein
TraesCS4B02G227600	cDEG	13	27	11	16	40.7407				LOC_Os03g13870	expressed protein
TraesCS4D02G021000	cDEG	12	27	20	7	74.0741				LOC_Os03g47280	VQ domain containing protein
TraesCS4D02G093700	cDEG	15	27	24	3	88.8889				LOC_Os11g07950	expressed protein
TraesCS4D02G228500	cDEG	13	27	5	22	18.5185				LOC_Os03g13870	expressed protein
TraesCS5A02G064500	cDEG	11	27	5	22	18.5185				LOC_Os12g40180	expressed protein
TraesCS5A02G235200	cDEG	14	27	24	3	88.8889				LOC_Os02g42450	RIPER1 - Ripening-related family protein precursor
TraesCS5D02G049200	cDEG	14	27	16	11	59.2593
TraesCS6B02G383200	cDEG	13	27	24	3	88.8889
TraesCS7B02G259700	cDEG	12	27	18	9	66.6667
TraesCS7D02G357500	cDEG	11	27	17	10	62.963
TraesCS7D02G357900	cDEG	13	27	16	11	59.2593
TraesCS5B02G559400	cDEG	11	26	25	1	96.1538	AT5G50600	HSD1	11-beta-hydroxysteroid dehydrogenase 1A	LOC_Os12g27830	dehydrogenase/reductase
TraesCS7D02G175900	cDEG	15	26	19	7	73.0769	AT1G76690	OPR2	12-oxophytodienoate reductase 2	LOC_Os06g11240	12-oxophytodienoate reductase
TraesCS7D02G524600	cDEG	12	26	0	26	0	AT1G76690	OPR2	12-oxophytodienoate reductase 2	LOC_Os06g11290	12-oxophytodienoate reductase
TraesCS6B02G356200	cDEG	15	26	19	7	73.0769	AT1G05010	ACO4	1-aminocyclopropane-1-carboxylate oxidase 4	LOC_Os02g53180	1-aminocyclopropane-1-carboxylate oxidase protein
TraesCS2A02G026800	cDEG	14	26	24	2	92.3077	AT1G06640		1-aminocyclopropane-1-carboxylate oxidase homolog 2	LOC_Os04g10350	1-aminocyclopropane-1-carboxylate oxidase homolog 2
TraesCSU02G024200	cDEG	12	26	7	19	26.9231	AT1G06640		1-aminocyclopropane-1-carboxylate oxidase homolog 2	LOC_Os03g48430	1-aminocyclopropane-1-carboxylate oxidase homolog 4
TraesCS4A02G311000	cDEG	12	26	23	3	88.4615	AT2G36690		2-oxoglutarate (2OG) and Fe(II)-dependent oxygenase superfamily protein	LOC_Os08g44590	gibberellin 20 oxidase 2
TraesCS4B02G195000	cDEG	12	26	19	7	73.0769	AT3G11180		2-oxoglutarate (2OG) and Fe(II)-dependent oxygenase superfamily protein	LOC_Os03g18030	leucoanthocyanidin dioxygenase
TraesCS4D02G341800	cDEG	13	26	12	14	46.1538	AT5G24530	DMR6	2-oxoglutarate (2OG) and Fe(II)-dependent oxygenase superfamily protein	LOC_Os03g03034	flavonol synthase/flavanone 3-hydroxylase
TraesCS6B02G351600	cDEG	11	26	22	4	84.6154	AT5G20400		2-oxoglutarate (2OG) and Fe(II)-dependent oxygenase superfamily protein	LOC_Os02g17940	leucoanthocyanidin dioxygenase
TraesCS6D02G300600	cDEG	13	26	23	3	88.4615	AT5G20400		2-oxoglutarate (2OG) and Fe(II)-dependent oxygenase superfamily protein	LOC_Os06g07932	flavonol synthase/flavanone 3-hydroxylase
TraesCS7A02G280900	cDEG	14	26	19	7	73.0769	AT2G36690		2-oxoglutarate (2OG) and Fe(II)-dependent oxygenase superfamily protein	LOC_Os08g44590	gibberellin 20 oxidase 2
TraesCS5D02G011900	cDEG	12	26	19	7	73.0769	AT2G26260	3BETAHSD/D2	3beta-hydroxysteroid-dehydrogenase/decarboxylase isoform 2	LOC_Os03g29150	NAD dependent epimerase/dehydratase family protein
TraesCS3D02G285100	cDEG	14	26	22	4	84.6154	AT3G28345	ABCB15	ABC transporter B family member 15	LOC_Os01g52550	ABC transporter
TraesCS2A02G056800	cDEG	12	26	24	2	92.3077	AT3G62700	ABCC14	ABC transporter C family member 14	LOC_Os04g13210	multidrug resistance-associated protein
TraesCS3A02G129000	cDEG	11	26	21	5	80.7692	AT3G13080	ABCC3	ABC transporter C family member 3	LOC_Os01g07870	ABC transporter family protein
TraesCS4D02G092000	cDEG	13	26	23	3	88.4615	AT1G71960	ABCG25	ABC transporter G family member 25	LOC_Os11g07600	ABC-2 type transporter domain containing protein
TraesCS6D02G026300	cDEG	13	26	11	15	42.3077	AT1G62660	BFRUCT3	Acid beta-fructofuranosidase 3%2C vacuolar	LOC_Os02g01590	glycosyl hydrolases
TraesCS7A02G009200	cDEG	13	26	18	8	69.2308	AT1G62660	BFRUCT3	Acid beta-fructofuranosidase 3%2C vacuolar	LOC_Os02g01590	glycosyl hydrolases
TraesCS6B02G103800	cDEG	13	26	20	6	76.9231	AT5G24090	CHIB1	Acidic endochitinase	LOC_Os06g25010	glycosyl hydrolase
TraesCS5B02G291100	cDEG	12	26	24	2	92.3077	AT1G54570		Acyltransferase-like protein At1g54570%2C chloroplastic	LOC_Os09g33530	expressed protein
TraesCS5D02G299400	cDEG	12	26	24	2	92.3077	AT1G54570		Acyltransferase-like protein At1g54570%2C chloroplastic	LOC_Os09g33530	expressed protein
TraesCS1D02G045500	cDEG	13	26	25	1	96.1538	AT3G57230	AGL16	Agamous-like MADS-box protein AGL16	LOC_Os02g36924	OsMADS27 - MADS-box family gene with MIKCc type-box
TraesCS4A02G202100	cDEG	12	26	21	5	80.7692	AT1G77120	ADH1	Alcohol dehydrogenase class-P	LOC_Os11g10510	dehydrogenase
TraesCS2D02G565300	cDEG	13	26	5	21	19.2308	AT4G04955	ALN	Allantoinase	LOC_Os04g58390	allantoinase
TraesCS7D02G085200	cDEG	12	26	22	4	84.6154	AT1G08080	ACA7	Alpha carbonic anhydrase 7	LOC_Os08g36630	bifunctional monodehydroascorbate reductase and carbonic anhydrasenectarin-3 precursor
TraesCS1D02G187200	cDEG	14	26	23	3	88.4615	AT2G36290		alpha/beta-Hydrolases superfamily protein	LOC_Os10g37720	hydrolase
TraesCS3D02G179200	cDEG	13	26	25	1	96.1538	AT1G02660		alpha/beta-Hydrolases superfamily protein	LOC_Os01g15000	lipase
TraesCS3D02G224000	cDEG	11	26	20	6	76.9231	AT2G18360		alpha/beta-Hydrolases superfamily protein	LOC_Os01g44960	hydrolase
TraesCS6D02G352800	cDEG	14	26	7	19	26.9231	AT2G05260		alpha/beta-Hydrolases superfamily protein	LOC_Os07g34440	lipase class 3 family protein
TraesCS7A02G225600	cDEG	11	26	24	2	92.3077	AT4G02340		alpha/beta-Hydrolases superfamily protein	LOC_Os05g19150	hydrolase
TraesCS3B02G441200	cDEG	14	26	7	19	26.9231	AT5G63850	AAP4	Amino acid permease 4	LOC_Os12g08090	amino acid transporter
TraesCS7D02G218100	cDEG	13	26	19	7	73.0769	AT5G50140		Ankyrin repeat family protein	LOC_Os06g18900	cadmium tolerance factor
TraesCS7A02G215700	cDEG	13	26	24	2	92.3077	AT4G18910	NIP1-2	Aquaporin NIP1-2	LOC_Os02g13870	aquaporin protein
TraesCS7D02G339600	cDEG	13	26	2	24	7.69231	AT3G16240	TIP2-1	Aquaporin TIP2-1	LOC_Os06g22960	aquaporin protein
TraesCS5A02G518300	cDEG	13	26	19	7	73.0769	AT2G25810	TIP4-1	Aquaporin TIP4-1	LOC_Os05g14240	aquaporin protein
TraesCS5D02G011800	cDEG	12	26	21	5	80.7692	AT4G15340	PEN1	Arabidiol synthase	LOC_Os11g35710	cycloartenol synthase
TraesCS3A02G077100	cDEG	12	26	24	2	92.3077	AT3G47340	ASN1	Asparagine synthetase	LOC_Os06g15420	asparagine synthetase
TraesCS3A02G227000	cDEG	14	26	4	22	15.3846	AT1G62290	APA2	Aspartic proteinase A2	LOC_Os01g44130	aspartic proteinase oryzasin-1 precursor
TraesCS2A02G331700	cDEG	13	26	25	1	96.1538	AT5G47810	PFK2	ATP-dependent 6-phosphofructokinase 2	LOC_Os09g30240	phosphofructokinase
TraesCS5D02G068800	cDEG	12	26	2	24	7.69231	AT5G28770	BZIP63	Basic leucine zipper 63	LOC_Os12g40920	bZIP transcription factor domain containing protein
TraesCS7D02G149000	cDEG	14	26	21	5	80.7692	AT5G13170	SWEET15	Bidirectional sugar transporter SWEET15	LOC_Os02g30910	nodulin MtN3 family protein
TraesCS4B02G368300	mDEG	10	26	8	18	30.7692	AT1G12100		Bifunctional inhibitor/lipid-transfer protein/seed storage 2S albumin superfamily protein	LOC_Os03g01300	LTPL114 - Protease inhibitor/seed storage/LTP family protein precursor
TraesCS5B02G435600	cDEG	12	26	18	8	69.2308	AT3G22600		Bifunctional inhibitor/lipid-transfer protein/seed storage 2S albumin superfamily protein	LOC_Os03g57970	LTPL73 - Protease inhibitor/seed storage/LTP family protein precursor
TraesCS4B02G235400	cDEG	13	26	18	8	69.2308	AT1G10070	BCAT2	Branched-chain-amino-acid aminotransferase 2%2C chloroplastic	LOC_Os03g12890	aminotransferase domain containing protein
TraesCS4A02G059800	cDEG	14	26	18	8	69.2308	AT3G49680	BCAT3	Branched-chain-amino-acid aminotransferase 3%2C chloroplastic	LOC_Os03g12890	aminotransferase domain containing protein
TraesCS7D02G239400	cDEG	11	26	18	8	69.2308	AT4G34050	CCOAOMT1	Caffeoyl-CoA O-methyltransferase 1	LOC_Os08g38910	caffeoyl-CoA O-methyltransferase
TraesCS2B02G439100	cDEG	12	26	24	2	92.3077	AT4G38810		Calcium-binding EF-hand family protein	LOC_Os10g09850	EF hand family protein
TraesCS3D02G041400	cDEG	13	26	13	13	50	AT5G37770	CML24	Calcium-binding protein CML24	LOC_Os01g04330	OsCML16 - Calmodulin-related calcium sensor protein
TraesCS4B02G001000	cDEG	13	26	19	7	73.0769	AT5G23950		Calcium-dependent lipid-binding (CaLB domain) family protein	LOC_Os08g44850	C2 domain containing protein
TraesCSU02G003600	cDEG	13	26	19	7	73.0769	AT3G21180	ACA9	Calcium-transporting ATPase 9%2C plasma membrane-type	LOC_Os11g04460	calcium-transporting ATPase
TraesCS3D02G209200	cDEG	13	26	13	13	50	AT2G26190		calmodulin-binding family protein	LOC_Os01g38980	calmodulin-binding protein
TraesCS5A02G183300	cDEG	12	26	18	8	69.2308	AT4G33720		CAP (Cysteine-rich secretory proteins%2C Antigen 5%2C and Pathogenesis-related 1 protein) superfamily protein	LOC_Os01g28500	SCP-like extracellular protein
TraesCS5B02G442600	cDEG	11	26	21	5	80.7692	AT5G57625		CAP (Cysteine-rich secretory proteins%2C Antigen 5%2C and Pathogenesis-related 1 protein) superfamily protein	LOC_Os07g03710	SCP-like extracellular protein
TraesCS1D02G248200	cDEG	14	26	18	8	69.2308	AT3G06390		CASP-like protein 1D2	LOC_Os07g26110	membrane associated DUF588 domain containing protein
TraesCS6D02G048300	cDEG	12	26	24	2	92.3077	AT4G35090	CAT2	Catalase-2	LOC_Os02g02400	catalase isozyme A
TraesCS4D02G013400	cDEG	15	26	19	7	73.0769	AT5G17860	CCX1	Cation/calcium exchanger 1	LOC_Os03g45370	sodium/calcium exchanger protein
TraesCS5B02G146500	cDEG	13	26	4	22	15.3846	AT5G07070	CIPK2	CBL-interacting serine/threonine-protein kinase 2	LOC_Os11g02240	CAMK_KIN1/SNF1/Nim1_like.4 - CAMK includes calcium/calmodulin depedent protein kinases
TraesCSU02G003300	cDEG	13	26	3	23	11.5385	AT3G03050	CSLD3	Cellulose synthase-like protein D3	LOC_Os07g36630	CSLF8 - cellulose synthase-like family F; beta1
TraesCS7A02G528900	cDEG	12	26	12	14	46.1538	AT2G17880		Chaperone DnaJ-domain superfamily protein	LOC_Os08g43490	heat shock protein DnaJ
TraesCS7B02G170400	cDEG	14	26	1	25	3.84615	AT2G17880		Chaperone DnaJ-domain superfamily protein	LOC_Os08g43490	heat shock protein DnaJ
TraesCS7D02G271900	cDEG	15	26	1	25	3.84615	AT2G17880		Chaperone DnaJ-domain superfamily protein	LOC_Os08g43490	heat shock protein DnaJ
TraesCSU02G032600	cDEG	13	26	24	2	92.3077	AT5G23760		Copper transport protein family	LOC_Os03g02070	heavy-metal-associated domain-containing protein
TraesCS7B02G080800	cDEG	14	26	19	7	73.0769	AT2G15780		Cupredoxin superfamily protein	LOC_Os06g11310	plastocyanin-like domain containing protein
TraesCS2B02G240800	cDEG	12	26	26	0	100	AT4G23180	CRK10	Cysteine-rich receptor-like protein kinase 10	LOC_Os07g35690	TKL_IRAK_DUF26-lc.3 - DUF26 kinases have homology to DUF26 containing loci
TraesCS2B02G240900	cDEG	12	26	24	2	92.3077	AT4G23180	CRK10	Cysteine-rich receptor-like protein kinase 10	LOC_Os07g35290	TKL_IRAK_DUF26-lc.10 - DUF26 kinases have homology to DUF26 containing loci
TraesCS2D02G222300	cDEG	13	26	23	3	88.4615	AT4G23180	CRK10	Cysteine-rich receptor-like protein kinase 10	LOC_Os07g35290	TKL_IRAK_DUF26-lc.10 - DUF26 kinases have homology to DUF26 containing loci
TraesCS4B02G092700	cDEG	11	26	12	14	46.1538	AT4G04490	CRK36	Cysteine-rich receptor-like protein kinase 36	LOC_Os11g11890	protein kinase domain containing protein
TraesCS2D02G025400	cDEG	12	26	11	15	42.3077	AT4G04500	CRK37	Cysteine-rich receptor-like protein kinase 37	LOC_Os11g39450	cysteine-rich receptor-like protein kinase 7 precursor
TraesCS1A02G073300	cDEG	14	26	22	4	84.6154	AT5G40380	CRK42	Cysteine-rich receptor-like protein kinase 42	LOC_Os05g03920	TKL_IRAK_DUF26-lf.3 - DUF26 kinases have homology to DUF26 containing loci
TraesCS1D02G439500	cDEG	13	26	22	4	84.6154	AT3G50930	BCS1	cytochrome BC1 synthesis	LOC_Os05g51130	mitochondrial chaperone BCS1
TraesCS3B02G246300	cDEG	11	26	23	3	88.4615	AT3G50930	BCS1	cytochrome BC1 synthesis	LOC_Os01g42030	mitochondrial chaperone BCS1
TraesCS4D02G309900	cDEG	12	26	23	3	88.4615	AT2G26170	CYP711A1	Cytochrome P450 711A1	LOC_Os01g50590	cytochrome P450
TraesCS5D02G487900	cDEG	11	26	21	5	80.7692	AT1G13080	CYP71B2	Cytochrome P450 71B2	LOC_Os02g17760	cytochrome P450
TraesCS6B02G125800	cDEG	12	26	24	2	92.3077	AT1G13080	CYP71B2	Cytochrome P450 71B2	LOC_Os12g16720	cytochrome P450 71A1
TraesCS2A02G325100	cDEG	14	26	23	3	88.4615	AT3G26310	CYP71B35	Cytochrome P450 71B35	LOC_Os04g40470	cytochrome P450
TraesCS7A02G523800	cDEG	12	26	23	3	88.4615	AT3G14680	CYP72A14	Cytochrome P450 72A14	LOC_Os01g43710	cytochrome P450 72A1
TraesCS3B02G256400	cDEG	13	26	24	2	92.3077	AT3G14690	CYP72A15	Cytochrome P450 72A15	LOC_Os01g43844	cytochrome P450 72A1
TraesCS6B02G416100	cDEG	11	26	21	5	80.7692	AT3G14690	CYP72A15	Cytochrome P450 72A15	LOC_Os01g41820	cytochrome P450 72A1
TraesCS4B02G330500	cDEG	12	26	4	22	15.3846	AT2G46660	CYP78A6	Cytochrome P450 78A6	LOC_Os03g04190	cytochrome P450
TraesCS1D02G359100	cDEG	14	26	18	8	69.2308	AT3G48520	CYP94B3	Cytochrome P450 94B3	LOC_Os11g29290	cytochrome P450
TraesCS5B02G128100	mDEG	10	26	14	12	53.8462	AT2G27690	CYP94C1	Cytochrome P450 94C1	LOC_Os12g05440	cytochrome P450
TraesCS5D02G137000	cDEG	11	26	15	11	57.6923	AT2G27690	CYP94C1	Cytochrome P450 94C1	LOC_Os12g05440	cytochrome P450
TraesCS2A02G152400	cDEG	13	26	13	13	50	AT2G46950	CYP709B2	cytochrome P450%2C family 709%2C subfamily B%2C polypeptide 2	LOC_Os07g44130	cytochrome P450 72A1
TraesCS2D02G157900	cDEG	12	26	16	10	61.5385	AT2G46950	CYP709B2	cytochrome P450%2C family 709%2C subfamily B%2C polypeptide 2	LOC_Os07g23570	cytochrome P450 72A1
TraesCS7B02G354400	cDEG	14	26	21	5	80.7692	AT1G12740	CYP87A2	cytochrome P450%2C family 87%2C subfamily A%2C polypeptide 2	LOC_Os04g48200	cytochrome P450
TraesCS5D02G318900	cDEG	11	26	1	25	3.84615	AT4G25480	DREB1A	Dehydration-responsive element-binding protein 1A	LOC_Os09g35030	dehydration-responsive element-binding protein
TraesCS1A02G349900	cDEG	13	26	17	9	65.3846	AT2G42750		DNAJ heat shock N-terminal domain-containing protein	LOC_Os05g45350	dnaJ domain containing protein
TraesCS5A02G211600	cDEG	13	26	20	6	76.9231	AT1G56220		Dormancy/auxin associated family protein	LOC_Os09g26620	auxin-repressed protein
TraesCS3B02G407700	cDEG	12	26	7	19	26.9231	AT5G04760		Duplicated homeodomain-like superfamily protein	LOC_Os01g64360	MYB family transcription factor
TraesCS7A02G454600	cDEG	12	26	23	3	88.4615	AT3G20570	ENODL9	early nodulin-like protein 9	LOC_Os06g46740	early nodulin 20 precursor
TraesCS4A02G392500	cDEG	12	26	19	7	73.0769	AT5G25940		early nodulin-related	LOC_Os06g05000	early nodulin 93 ENOD93 protein
TraesCS7B02G104600	cDEG	13	26	11	15	42.3077	AT2G32990	AtGH9B8	Endoglucanase 11	LOC_Os02g50490	endoglucanase
TraesCS7D02G207600	cDEG	13	26	15	11	57.6923	AT1G70710	CEL1	Endoglucanase 8	LOC_Os06g14540	endoglucanase
TraesCS7D02G360700	cDEG	12	26	25	1	96.1538	AT5G25900	KO	Ent-kaurene oxidase%2C chloroplastic	LOC_Os06g37364	cytochrome P450
TraesCS6B02G361400	cDEG	14	26	10	16	38.4615	AT1G21910	ERF012	Ethylene-responsive transcription factor ERF012	LOC_Os06g10780	AP2 domain containing protein
TraesCS5A02G314600	cDEG	13	26	17	9	65.3846	AT2G47520	ERF071	Ethylene-responsive transcription factor ERF071	LOC_Os01g21120	AP2 domain containing protein
TraesCS3A02G379900	cDEG	13	26	24	2	92.3077	AT5G50080	ERF110	Ethylene-responsive transcription factor ERF110	LOC_Os01g64790	AP2 domain containing protein
TraesCS3B02G412500	cDEG	13	26	23	3	88.4615	AT5G50080	ERF110	Ethylene-responsive transcription factor ERF110	LOC_Os01g64790	AP2 domain containing protein
TraesCS2B02G304800	cDEG	13	26	24	2	92.3077	AT5G13330	ERF113	Ethylene-responsive transcription factor ERF113	LOC_Os04g32620	ethylene-responsive transcription factor ERF114
TraesCS2D02G286300	cDEG	13	26	23	3	88.4615	AT5G13330	ERF113	Ethylene-responsive transcription factor ERF113	LOC_Os04g32620	ethylene-responsive transcription factor ERF114
TraesCS7B02G162100	cDEG	12	26	20	6	76.9231	AT5G61890	ERF114	Ethylene-responsive transcription factor ERF114	LOC_Os08g42550	AP2 domain containing protein
TraesCS1D02G230900	cDEG	12	26	18	8	69.2308	AT3G16770	RAP2-3	Ethylene-responsive transcription factor RAP2-3	LOC_Os05g29810	AP2 domain containing protein
TraesCS2B02G086200	cDEG	13	26	17	9	65.3846	AT2G03200		Eukaryotic aspartyl protease family protein	LOC_Os03g20290	aspartic proteinase nepenthesin-1 precursor
TraesCS7A02G489000	cDEG	13	26	13	13	50	AT5G10770		Eukaryotic aspartyl protease family protein	LOC_Os02g48870	aspartic proteinase nepenthesin-2 precursor
TraesCS7A02G528000	cDEG	13	26	14	12	53.8462	AT3G59080		Eukaryotic aspartyl protease family protein	LOC_Os02g21040	aspartic proteinase nepenthesin precursor
TraesCS7D02G475600	cDEG	14	26	8	18	30.7692	AT5G10770		Eukaryotic aspartyl protease family protein	LOC_Os02g48870	aspartic proteinase nepenthesin-2 precursor
TraesCS3B02G376800	cDEG	14	26	16	10	61.5385	AT1G69530	EXPA1	Expansin-A1	LOC_Os01g60770	expansin precursor
TraesCS1A02G203200	mDEG	10	26	9	17	34.6154	AT3G45970	EXLA1	Expansin-like A1	LOC_Os10g39640	expansin precursor
TraesCS4D02G317800	cDEG	12	26	3	23	11.5385	AT3G60900	FLA10	Fasciclin-like arabinogalactan protein 10	LOC_Os03g03600	fasciclin-like arabinogalactan protein
TraesCS3D02G244900	cDEG	12	26	2	24	7.69231	AT5G03170	FLA11	Fasciclin-like arabinogalactan protein 11	LOC_Os01g47780	fasciclin domain containing protein
TraesCS2B02G332200	cDEG	15	26	25	1	96.1538	AT4G05460	SKIP19	F-box protein SKIP19	LOC_Os08g09450	OsFBL41 - F-box domain and LRR containing protein
TraesCS4A02G095500	cDEG	14	26	4	22	15.3846	AT3G09350	Fes1A	Fes1A	LOC_Os03g16460	expressed protein
TraesCS4D02G209700	cDEG	14	26	4	22	15.3846	AT3G53800	Fes1B	Fes1B	LOC_Os03g16460	expressed protein
TraesCS5D02G488900	cDEG	13	26	18	8	69.2308	AT5G54160	OMT1	Flavone 3'-O-methyltransferase 1	LOC_Os08g06100	O-methyltransferase
TraesCS2D02G046600	cDEG	11	26	0	26	0	AT4G31380	FLP1	FPF1-like protein 1	LOC_Os07g47450	flowering promoting factor-like 1
TraesCS1D02G274200	cDEG	12	26	10	16	38.4615	AT1G43670		Fructose-1%2C6-bisphosphatase%2C cytosolic	LOC_Os01g64660	fructose-1
TraesCS3B02G411300	cDEG	13	26	21	5	80.7692	AT1G03970	GBF4	G-box-binding factor 4	LOC_Os01g64730	bZIP transcription factor domain containing protein
TraesCS3D02G020600	cDEG	12	26	25	1	96.1538	AT3G26430		GDSL esterase/lipase At3g26430	LOC_Os07g39740	GDSL-like lipase/acylhydrolase
TraesCSU02G128200	cDEG	13	26	20	6	76.9231	AT5G39110	GLP6	Germin-like protein subfamily 1 member 14	LOC_Os08g08990	Cupin domain containing protein
TraesCS3B02G282300	cDEG	12	26	15	11	57.6923	AT1G18980		Germin-like protein subfamily T member 2	LOC_Os03g48780	Cupin domain containing protein
TraesCS4D02G031800	cDEG	12	26	15	11	57.6923	AT1G18980		Germin-like protein subfamily T member 2	LOC_Os03g48780	Cupin domain containing protein
TraesCS4D02G032200	cDEG	14	26	15	11	57.6923	AT1G18980		Germin-like protein subfamily T member 2	LOC_Os03g48780	Cupin domain containing protein
TraesCS1A02G334400	mDEG	10	26	5	21	19.2308	AT1G30040	GA2OX2	Gibberellin 2-beta-dioxygenase 2	LOC_Os05g43880	gibberellin 2-beta-dioxygenase
TraesCS3D02G149600	cDEG	13	26	17	9	65.3846	AT1G30040	GA2OX2	Gibberellin 2-beta-dioxygenase 2	LOC_Os01g11150	gibberellin 2-beta-dioxygenase
TraesCS4D02G232700	cDEG	13	26	17	9	65.3846	AT2G02000	GAD3	Glutamate decarboxylase 3	LOC_Os08g36320	decarboxylase
TraesCS6D02G330900	cDEG	12	26	22	4	84.6154	AT2G29110	GLR2.8	Glutamate receptor 2.8	LOC_Os02g54640	glutamate receptor
TraesCS3B02G123700	cDEG	12	26	23	3	88.4615	AT5G11930	GRXC10	Glutaredoxin-C10	LOC_Os01g09830	OsGrx_A2 - glutaredoxin subgroup III
TraesCS3A02G309100	cDEG	12	26	18	8	69.2308	AT3G62760	GSTF13	Glutathione S-transferase F13	LOC_Os01g27260	glutathione S-transferase
TraesCS3D02G133100	cDEG	12	26	20	6	76.9231	AT3G62760	GSTF13	Glutathione S-transferase F13	LOC_Os01g27260	glutathione S-transferase
TraesCS1A02G186400	cDEG	15	26	21	5	80.7692	AT1G10370	GSTU17	Glutathione S-transferase U17	LOC_Os10g38710	glutathione S-transferase
TraesCS6D02G127700	cDEG	12	26	19	7	73.0769	AT1G10370	GSTU17	Glutathione S-transferase U17	LOC_Os10g38670	glutathione S-transferase
TraesCS3B02G540200	cDEG	11	26	18	8	69.2308	AT3G09270	GSTU8	Glutathione S-transferase U8	LOC_Os01g72120	glutathione S-transferase
TraesCS3D02G332200	cDEG	14	26	8	18	30.7692	AT3G02040	GDPD1	Glycerophosphodiester phosphodiesterase GDPD1%2C chloroplastic	LOC_Os02g31030	glycerophosphoryl diester phosphodiesterase family protein
TraesCS2D02G332500	cDEG	12	26	3	23	11.5385	AT5G55480	GDPDL4	Glycerophosphodiester phosphodiesterase GDPDL4	LOC_Os04g39610	glycerophosphoryl diester phosphodiesterase family protein
TraesCS2B02G275500	cDEG	13	26	26	0	100	AT4G21620		glycine-rich protein	LOC_Os07g03180	GCRP3 - Glycine and cysteine rich family protein precursor
TraesCS7A02G412000	cDEG	14	26	6	20	23.0769	AT3G18170		Glycosyltransferase family 61 protein	LOC_Os06g49300	glycosyltransferase protein
TraesCS3B02G291900	cDEG	12	26	26	0	100	AT1G34300		G-type lectin S-receptor-like serine/threonine-protein kinase At1g34300	LOC_Os01g73390	expressed protein
TraesCS1B02G323100	cDEG	14	26	16	10	61.5385	AT2G19130		G-type lectin S-receptor-like serine/threonine-protein kinase At2g19130	LOC_Os01g06240	protein kinase
TraesCS7B02G356800	cDEG	14	26	21	5	80.7692	AT2G19130		G-type lectin S-receptor-like serine/threonine-protein kinase At2g19130	LOC_Os07g36780	S-domain receptor-like protein kinase
TraesCS4A02G096500	cDEG	13	26	18	8	69.2308	AT5G02230		Haloacid dehalogenase-like hydrolase (HAD) superfamily protein	LOC_Os03g16670	haloacid dehalogenase-like hydrolase family protein
TraesCS2D02G033200	cDEG	12	26	16	10	61.5385	AT5G52640	HSP81-1	heat shock protein 90.1	LOC_Os04g01740	heat shock protein
TraesCS2D02G540300	cDEG	14	26	18	8	69.2308	AT1G01490		Heavy metal transport/detoxification superfamily protein	LOC_Os04g57200	heavy metal transport/detoxification protein
TraesCS3B02G593700	cDEG	13	26	23	3	88.4615	AT5G02600	NAKR1	Heavy metal transport/detoxification superfamily protein	LOC_Os01g74490	heavy metal-associated domain containing protein
TraesCS3D02G341000	cDEG	14	26	23	3	88.4615	AT5G05365		Heavy metal transport/detoxification superfamily protein	LOC_Os01g61070	heavy metal-associated domain containing protein
TraesCS5B02G449000	cDEG	13	26	4	22	15.3846	AT2G30620		Histone H1.2	LOC_Os03g58470	retrotransposon protein
TraesCS6B02G048800	cDEG	15	26	4	22	15.3846	AT5G22880	H2B	Histone H2B.10	LOC_Os08g38300	Core histone H2A/H2B/H3/H4 domain containing protein
TraesCS1D02G366300	cDEG	14	26	8	18	30.7692	AT3G46030	HTB11	Histone H2B.7	LOC_Os01g05610	Core histone H2A/H2B/H3/H4 domain containing protein
TraesCS1D02G379700	cDEG	12	26	26	0	100	AT5G06710	HAT14	Homeobox-leucine zipper protein HAT14	LOC_Os02g35770	homeobox associated leucine zipper
TraesCS7B02G372000	cDEG	14	26	22	4	84.6154	AT2G02060		Homeodomain-like superfamily protein	LOC_Os06g45890	MYB family transcription factor
TraesCS2D02G349400	cDEG	14	26	19	7	73.0769	AT3G54420	ATEP3	homolog of carrot EP3-3 chitinase	LOC_Os04g41680	CHIT3 - Chitinase family protein precursor
TraesCS3A02G367900	cDEG	13	26	12	14	46.1538	AT2G39980		HXXXD-type acyl-transferase family protein	LOC_Os01g63480	transferase family protein
TraesCS7A02G407600	cDEG	11	26	23	3	88.4615	AT5G17540		HXXXD-type acyl-transferase family protein	LOC_Os06g49660	transferase family protein
TraesCS2A02G183900	cDEG	13	26	16	10	61.5385	AT2G23170	GH3.3	Indole-3-acetic acid-amido synthetase GH3.3	LOC_Os07g40290	OsGH3.8 - Probable indole-3-acetic acid-amido synthetase
TraesCS1D02G368600	cDEG	13	26	26	0	100	AT1G73040	JAL19	Jacalin-related lectin 19	LOC_Os01g51050	jacalin-like lectin domain containing protein
TraesCS1A02G115700	cDEG	12	26	21	5	80.7692	AT1G80160		Lactoylglutathione lyase / glyoxalase I family protein	LOC_Os05g07940	glyoxalase family protein
TraesCS1D02G369400	cDEG	11	26	26	0	100	AT1G52690		Late embryogenesis abundant protein (LEA) family protein	LOC_Os05g46480	late embryogenesis abundant protein
TraesCS4D02G329400	cDEG	13	26	10	16	38.4615	AT1G52690		Late embryogenesis abundant protein (LEA) family protein	LOC_Os05g46480	late embryogenesis abundant protein
TraesCS3B02G420500	cDEG	13	26	7	19	26.9231	AT1G72180		Leucine-rich receptor-like protein kinase family protein	LOC_Os01g65650	receptor-like protein kinase HAIKU2 precursor
TraesCS2D02G344600	cDEG	13	26	21	5	80.7692	AT3G28450		Leucine-rich repeat protein kinase family protein	LOC_Os04g41030	inactive receptor kinase At1g27190 precursor
TraesCS3D02G438600	cDEG	13	26	6	20	23.0769	AT3G47580		Leucine-rich repeat protein kinase family protein	LOC_Os11g46980	receptor-like protein kinase 2 precursor
TraesCS3D02G033800	cDEG	12	26	19	7	73.0769				LOC_Os01g03380	BBTI6 - Bowman-Birk type bran trypsin inhibitor precursor
TraesCS5B02G478300	cDEG	11	26	17	9	65.3846				LOC_Os01g04040	BBTI11 - Bowman-Birk type bran trypsin inhibitor precursor
TraesCS5D02G479300	cDEG	14	26	22	4	84.6154				LOC_Os01g04040	BBTI11 - Bowman-Birk type bran trypsin inhibitor precursor
TraesCS1B02G276500	cDEG	13	26	22	4	84.6154				LOC_Os01g04050	BBTI12 - Bowman-Birk type bran trypsin inhibitor precursor
TraesCS1D02G265800	cDEG	12	26	21	5	80.7692				LOC_Os01g04050	BBTI12 - Bowman-Birk type bran trypsin inhibitor precursor
TraesCS7B02G316900	cDEG	13	26	24	2	92.3077				LOC_Os01g32670	expressed protein
TraesCS3D02G517700	cDEG	12	26	20	6	76.9231				LOC_Os01g72900	abscisic stress-ripening
TraesCS3B02G578400	cDEG	12	26	6	20	23.0769				LOC_Os01g73250	abscisic stress-ripening
TraesCS6D02G168900	cDEG	13	26	21	5	80.7692				LOC_Os02g10730	expressed protein
TraesCS4A02G005200	cDEG	12	26	13	13	50				LOC_Os03g08520	DUF581 domain containing protein
TraesCS4D02G298700	cDEG	13	26	12	14	46.1538				LOC_Os03g08520	DUF581 domain containing protein
TraesCS4B02G198000	cDEG	13	26	20	6	76.9231				LOC_Os03g17670	expressed protein
TraesCS2D02G317800	cDEG	11	26	22	4	84.6154				LOC_Os03g18850	pathogenesis-related Bet v I family protein
TraesCS3D02G175900	cDEG	12	26	26	0	100				LOC_Os03g36080	expressed protein
TraesCS7D02G327600	cDEG	13	26	20	6	76.9231				LOC_Os04g01950	legume lectins beta domain containing protein
TraesCS1A02G232600	cDEG	11	26	18	8	69.2308				LOC_Os05g30500	expressed protein
TraesCS1B02G245700	mDEG	10	26	21	5	80.7692				LOC_Os05g30500	expressed protein
TraesCS1B02G245800	mDEG	10	26	19	7	73.0769				LOC_Os05g30500	expressed protein
TraesCS1D02G383700	cDEG	13	26	21	5	80.7692				LOC_Os05g47870	expressed protein
TraesCS7D02G068200	cDEG	12	26	7	19	26.9231				LOC_Os06g04220	expressed protein
TraesCS6B02G398200	cDEG	14	26	13	13	50				LOC_Os06g19010	cadmium tolerance factor
TraesCS5A02G172800	cDEG	13	26	21	5	80.7692				LOC_Os09g10620	seed maturation protein LEA 4
TraesCS5D02G199100	cDEG	15	26	18	8	69.2308				LOC_Os09g19970	expressed protein
TraesCS5A02G208100	cDEG	12	26	4	22	15.3846				LOC_Os09g27160	expressed protein
TraesCS1A02G323000	cDEG	14	26	24	2	92.3077				LOC_Os10g04540	expressed protein
TraesCS5B02G560800	cDEG	13	26	22	4	84.6154				LOC_Os10g34760	RIPER3 - Ripening-related family protein precursor
TraesCS4A02G107000	cDEG	14	26	23	3	88.4615	AT2G38905		Low temperature and salt responsive protein family	LOC_Os03g17790	OsRCI2-5 - Putative low temperature and salt responsive protein
TraesCS2A02G461800	cDEG	12	26	3	23	11.5385	AT5G46330	FLS2	LRR receptor-like serine/threonine-protein kinase FLS2	LOC_Os04g52780	leucine-rich repeat receptor protein kinase EXS precursor
TraesCS1A02G048000	cDEG	12	26	24	2	92.3077	AT2G37710	LECRK41	L-type lectin-domain containing receptor kinase IV.1	LOC_Os02g19530	lectin-like receptor kinase
TraesCS2A02G371600	cDEG	14	26	19	7	73.0769	AT2G37710	LECRK41	L-type lectin-domain containing receptor kinase IV.1	LOC_Os07g03930	lectin-like receptor kinase
TraesCS7D02G080600	cDEG	11	26	23	3	88.4615	AT2G37710	LECRK41	L-type lectin-domain containing receptor kinase IV.1	LOC_Os07g03780	lectin-like receptor kinase
TraesCS5A02G500100	cDEG	12	26	22	4	84.6154	AT5G10530	LECRK91	L-type lectin-domain containing receptor kinase IX.1	LOC_Os12g41490	cysteine-rich receptor-like protein kinase 8 precursor
TraesCS2A02G134000	cDEG	12	26	1	25	3.84615	AT5G13630	CHLH	Magnesium-chelatase subunit ChlH%2C chloroplastic	LOC_Os03g20700	magnesium-chelatase
TraesCS3A02G500000	cDEG	11	26	19	7	73.0769	AT3G21690		MATE efflux family protein	LOC_Os03g37640	MATE efflux family protein
TraesCS7B02G101500	cDEG	13	26	16	10	61.5385	AT1G70170	MMP	matrix metalloproteinase	LOC_Os06g13180	metalloendoproteinase 1 precursor
TraesCS1D02G284000	cDEG	14	26	19	7	73.0769	AT5G42020	MED37F	Mediator of RNA polymerase II transcription subunit 37f	LOC_Os11g08460	DnaK family protein
TraesCS1B02G384900	cDEG	13	26	16	10	61.5385	AT2G32510	MAPKKK17	mitogen-activated protein kinase kinase kinase 17	LOC_Os05g46760	STE_MEKK_ste11_MAP3K.19 - STE kinases include homologs to sterile 7
TraesCS1D02G372500	cDEG	14	26	15	11	57.6923	AT2G32510	MAPKKK17	mitogen-activated protein kinase kinase kinase 17	LOC_Os05g46760	STE_MEKK_ste11_MAP3K.19 - STE kinases include homologs to sterile 7
TraesCS6A02G224000	cDEG	11	26	11	15	42.3077	AT3G23250	MYB15	myb domain protein 15	LOC_Os02g41510	MYB family transcription factor
TraesCS6D02G274900	cDEG	12	26	25	1	96.1538	AT1G66230	MYB20	myb domain protein 20	LOC_Os02g49986	MYB family transcription factor
TraesCS3A02G044700	cDEG	13	26	24	2	92.3077	AT1G68320	MYB62	myb domain protein 62	LOC_Os01g03720	MYB family transcription factor
TraesCS2D02G209600	cDEG	14	26	21	5	80.7692	AT4G21440	ATMYB102	MYB-like 102	LOC_Os07g37210	MYB family transcription factor
TraesCS5A02G291200	cDEG	11	26	21	5	80.7692	AT2G33480	ANAC041	NAC domain containing protein 41	LOC_Os09g33490	no apical meristem protein
TraesCS1A02G190100	cDEG	16	26	21	5	80.7692	AT4G17980	anac071	NAC domain containing protein 71	LOC_Os10g42130	no apical meristem protein
TraesCS1D02G194200	cDEG	12	26	22	4	84.6154	AT4G17980	anac071	NAC domain containing protein 71	LOC_Os10g42130	no apical meristem protein
TraesCS1A02G263700	cDEG	12	26	24	2	92.3077	AT1G01720	NAC002	NAC domain-containing protein 2	LOC_Os05g34830	No apical meristem protein
TraesCS5D02G481200	cDEG	12	26	16	10	61.5385	AT1G01720	NAC002	NAC domain-containing protein 2	LOC_Os03g60080	NAC domain-containing protein 67
TraesCS5A02G127200	cDEG	11	26	20	6	76.9231	AT5G22380	NAC090	NAC domain-containing protein 90	LOC_Os11g05614	no apical meristem protein
TraesCS2D02G185400	cDEG	12	26	24	2	92.3077	AT4G27250		NAD(P)-binding Rossmann-fold superfamily protein	LOC_Os07g40986	NAD dependent epimerase/dehydratase family protein
TraesCS5B02G268300	cDEG	11	26	1	25	3.84615	AT2G33590		NAD(P)-binding Rossmann-fold superfamily protein	LOC_Os09g31502	dehydrogenase
TraesCS2D02G313700	cDEG	13	26	26	0	100	AT1G59960		NAD(P)-linked oxidoreductase superfamily protein	LOC_Os04g37490	oxidoreductase
TraesCS2A02G593300	cDEG	13	26	20	6	76.9231	AT5G36970	NHL25	NDR1/HIN1-like 25	LOC_Os04g58090	harpin-induced protein 1 domain containing protein
TraesCS3D02G361800	cDEG	12	26	9	17	34.6154	AT3G55840	HSPRO1	Nematode resistance protein-like HSPRO1	LOC_Os01g63690	hs1
TraesCS6B02G356800	cDEG	15	26	10	16	38.4615	AT1G77760	NIA1	Nitrate reductase	LOC_Os02g53130	nitrate reductase
TraesCS4A02G061700	cDEG	13	26	20	6	76.9231	AT2G16060	AHB1	Non-symbiotic hemoglobin 1	LOC_Os03g12510	non-symbiotic hemoglobin 2
TraesCS1D02G422600	cDEG	13	26	24	2	92.3077	AT3G18570		Oleosin family protein	LOC_Os05g50110	oleosin
TraesCS7A02G558500	cDEG	12	26	20	6	76.9231	AT4G11650	OSM34	Osmotin-like protein OSM34	LOC_Os12g43380	thaumatin
TraesCS7D02G551400	cDEG	13	26	20	6	76.9231	AT4G11650	OSM34	Osmotin-like protein OSM34	LOC_Os12g43380	thaumatin
TraesCSU02G146600	cDEG	12	26	22	4	84.6154	AT4G11650	OSM34	Osmotin-like protein OSM34	LOC_Os12g43380	thaumatin
TraesCS2A02G247300	cDEG	13	26	3	23	11.5385	AT3G50820	PSBO2	Oxygen-evolving enhancer protein 1-2%2C chloroplastic	LOC_Os01g31690	oxygen-evolving enhancer protein 1
TraesCS7B02G368100	cDEG	14	26	3	23	11.5385	AT1G30690	PATL4	Patellin-4	LOC_Os06g45990	patellin-5
TraesCS3D02G217400	cDEG	14	26	22	4	84.6154	AT4G13650	PCMP-H42	Pentatricopeptide repeat-containing protein At4g13650	LOC_Os01g41650	pentatricopeptide
TraesCS1D02G080400	cDEG	12	26	19	7	73.0769	AT1G05260	PER3	Peroxidase 3	LOC_Os05g04490	peroxidase precursor
TraesCS4A02G235800	cDEG	12	26	13	13	50	AT4G33420	PER47	Peroxidase 47	LOC_Os07g44550	peroxidase precursor
TraesCS4D02G116700	cDEG	12	26	23	3	88.4615	AT5G05340	PER52	Peroxidase 52	LOC_Os11g02130	peroxidase precursor
TraesCS7A02G353400	cDEG	14	26	9	17	34.6154	AT5G05340	PER52	Peroxidase 52	LOC_Os06g35520	peroxidase precursor
TraesCS4D02G055700	cDEG	14	26	24	2	92.3077	AT5G39050	PMAT1	Phenolic glucoside malonyltransferase 1	LOC_Os02g28340	transferase family protein
TraesCS6A02G222700	cDEG	11	26	13	13	50	AT2G37040	PAL1	Phenylalanine ammonia-lyase 1	LOC_Os02g41680	phenylalanine ammonia-lyase
TraesCS4D02G220500	cDEG	14	26	16	10	61.5385	AT4G37870	PCKA	Phosphoenolpyruvate carboxykinase	LOC_Os03g15050	phosphoenolpyruvate carboxykinase
TraesCS4A02G345900	cDEG	11	26	15	11	57.6923	AT5G53890	PSKR2	Phytosulfokine receptor 2	LOC_Os07g01710	phytosulfokine receptor precursor
TraesCS5D02G525400	cDEG	11	26	20	6	76.9231	AT5G53890	PSKR2	Phytosulfokine receptor 2	LOC_Os07g01710	phytosulfokine receptor precursor
TraesCS5B02G023000	cDEG	13	26	14	12	53.8462	AT5G39890	PCO2	Plant cysteine oxidase 2	LOC_Os12g42860	2-aminoethanethiol dioxygenase
TraesCS5D02G455900	cDEG	14	26	21	5	80.7692	AT3G28510		P-loop containing nucleoside triphosphate hydrolases superfamily protein	LOC_Os03g58790	ATPase
TraesCS6D02G379900	cDEG	14	26	22	4	84.6154	AT3G45090		P-loop NTPase domain-containing protein LPA1 homolog 2	LOC_Os02g57400	2-phosphoglycerate kinase-related
TraesCS2D02G433600	cDEG	12	26	13	13	50	AT5G13140		Pollen Ole e 1 allergen and extensin family protein	LOC_Os12g28770	POEI19 - Pollen Ole e I allergen and extensin family protein precursor
TraesCS6D02G275100	cDEG	11	26	22	4	84.6154	AT4G13420	POT5	Potassium transporter 5	LOC_Os04g32920	potassium transporter
TraesCS1B02G250900	cDEG	15	26	17	9	65.3846	AT1G24620	CML25	Probable calcium-binding protein CML25	LOC_Os05g31620	OsCML15 - Calmodulin-related calcium sensor protein
TraesCS1D02G256800	cDEG	13	26	20	6	76.9231	AT5G06570	CXE15	Probable carboxylesterase 15	LOC_Os05g33940	alpha/beta hydrolase fold
TraesCS5A02G427400	cDEG	14	26	17	9	65.3846	AT5G06570	CXE15	Probable carboxylesterase 15	LOC_Os03g57640	gibberellin receptor GID1L2
TraesCS5B02G429300	cDEG	12	26	18	8	69.2308	AT5G06570	CXE15	Probable carboxylesterase 15	LOC_Os03g57640	gibberellin receptor GID1L2
TraesCS7B02G336900	cDEG	15	26	7	19	26.9231	AT5G02560	HTA12	Probable histone H2A.4	LOC_Os05g02300	Core histone H2A/H2B/H3/H4 domain containing protein
TraesCS7D02G427800	cDEG	13	26	3	23	11.5385	AT5G02560	HTA12	Probable histone H2A.4	LOC_Os01g31800	Core histone H2A/H2B/H3/H4 domain containing protein
TraesCS7D02G428400	cDEG	13	26	6	20	23.0769	AT5G02560	HTA12	Probable histone H2A.4	LOC_Os05g02300	Core histone H2A/H2B/H3/H4 domain containing protein
TraesCS5D02G327800	cDEG	13	26	16	10	61.5385	AT5G63140	PAP29	Probable inactive purple acid phosphatase 29	LOC_Os09g36290	Ser/Thr protein phosphatase family protein
TraesCS4A02G330000	cDEG	13	26	18	8	69.2308	AT3G47570		Probable LRR receptor-like serine/threonine-protein kinase At3g47570	LOC_Os08g24310	receptor-like protein kinase precursor
TraesCS7D02G277500	cDEG	12	26	23	3	88.4615	AT3G52880	ATMDAR1	Probable monodehydroascorbate reductase%2C cytoplasmic isoform 3	LOC_Os08g44340	monodehydroascorbate reductase
TraesCS4B02G183900	cDEG	13	26	16	10	61.5385	AT1G56430	NAS4	Probable nicotianamine synthase 4	LOC_Os03g19420	nicotianamine synthase
TraesCS3A02G327100	cDEG	12	26	25	1	96.1538	AT1G60420		Probable nucleoredoxin 1	LOC_Os01g58194	protein disulfide isomerase
TraesCS7B02G432900	cDEG	14	26	26	0	100	AT1G67300		Probable plastidic glucose transporter 2	LOC_Os02g17500	transporter family protein
TraesCS3A02G250700	cDEG	13	26	19	7	73.0769	AT4G29720	PAO5	Probable polyamine oxidase 5	LOC_Os01g51320	peroxisomal N-acetyl-spermine/spermidine oxidase precursor
TraesCS7D02G154700	cDEG	12	26	9	17	34.6154	AT4G36670	PLT6	Probable polyol transporter 6	LOC_Os10g21590	transporter family protein
TraesCS2D02G168100	cDEG	14	26	18	8	69.2308	AT2G22190	TPPE	Probable trehalose-phosphate phosphatase E	LOC_Os07g43160	uncharacterized glycosyl hydrolase Rv2006/MT2062
TraesCS6A02G248400	cDEG	13	26	2	24	7.69231	AT4G12430	TPPF	Probable trehalose-phosphate phosphatase F	LOC_Os02g44230	CPuORF22 - conserved peptide uORF-containing transcript
TraesCS2D02G168600	cDEG	14	26	14	12	53.8462	AT4G11070	WRKY41	Probable WRKY transcription factor 41	LOC_Os08g29660	WRKY69
TraesCS5B02G183700	cDEG	13	26	18	8	69.2308	AT4G11070	WRKY41	Probable WRKY transcription factor 41	LOC_Os09g16510	WRKY74
TraesCS1A02G358400	cDEG	13	26	14	12	53.8462	AT5G26170	WRKY50	Probable WRKY transcription factor 50	LOC_Os05g46020	WRKY7
TraesCS2A02G489500	cDEG	12	26	20	6	76.9231	AT3G56400	WRKY70	Probable WRKY transcription factor 70	LOC_Os05g25770	WRKY45
TraesCS3A02G242500	cDEG	14	26	19	7	73.0769	AT1G29860	WRKY71	Probable WRKY transcription factor 71	LOC_Os01g47560	WRKY16
TraesCS3A02G093600	cDEG	16	26	11	15	42.3077	AT5G57550	XTH25	Probable xyloglucan endotransglucosylase/hydrolase protein 25	LOC_Os08g13920	glycosyl hydrolases family 16
TraesCS7D02G360100	cDEG	13	26	12	14	46.1538	AT2G36870	XTH32	Probable xyloglucan endotransglucosylase/hydrolase protein 32	LOC_Os07g29750	glycosyl hydrolases family 16
TraesCS4A02G172600	cDEG	11	26	8	18	30.7692	AT5G13870	XTH5	Probable xyloglucan endotransglucosylase/hydrolase protein 5	LOC_Os11g33270	glycosyl hydrolases family 16
TraesCS1D02G433300	cDEG	11	26	3	23	11.5385	AT2G46225	ABIL1	Protein ABIL1	LOC_Os05g50800	expressed protein
TraesCS6B02G347200	cDEG	13	26	9	17	34.6154	AT4G08950	EXO	Protein EXORDIUM	LOC_Os02g52010	phosphate-induced protein 1 conserved region domain containing protein
TraesCS5A02G215400	cDEG	13	26	21	5	80.7692	AT2G05940		Protein kinase superfamily protein	LOC_Os09g27010	tyrosine protein kinase domain containing protein
TraesCS5B02G208500	cDEG	11	26	25	1	96.1538	AT2G05940		Protein kinase superfamily protein	LOC_Os09g27010	tyrosine protein kinase domain containing protein
TraesCS5D02G216600	mDEG	10	26	23	3	88.4615	AT2G05940		Protein kinase superfamily protein	LOC_Os09g27010	tyrosine protein kinase domain containing protein
TraesCS6B02G367100	cDEG	15	26	18	8	69.2308	AT2G05940		Protein kinase superfamily protein	LOC_Os02g53750	tyrosine protein kinase domain containing protein
TraesCS6B02G392700	cDEG	11	26	23	3	88.4615	AT1G23070		Protein LAZ1 homolog 2	LOC_Os03g29340	domain of unknown function domain containing protein
TraesCS2A02G264500	cDEG	15	26	23	3	88.4615	AT1G27040	NPF4.5	Protein NRT1/ PTR FAMILY 4.5	LOC_Os11g17970	POT family protein
TraesCS5A02G485200	cDEG	12	26	18	8	69.2308	AT3G53960	NPF5.7	Protein NRT1/ PTR FAMILY 5.7	LOC_Os03g60850	peptide transporter PTR2
TraesCS1B02G225000	cDEG	13	26	3	23	11.5385	AT1G12110	NPF6.3	Protein NRT1/ PTR FAMILY 6.3	LOC_Os10g40600	peptide transporter PTR2
TraesCS3D02G506900	cDEG	14	26	16	10	61.5385	AT4G21700		Protein of unknown function (DUF2921)	LOC_Os01g48620	expressed protein
TraesCSU02G052900	cDEG	13	26	16	10	61.5385	AT4G21700		Protein of unknown function (DUF2921)	LOC_Os01g48620	expressed protein
TraesCS7B02G141300	cDEG	13	26	5	21	19.2308	AT1G76620		Protein of unknown function%2C DUF547	LOC_Os08g40420	ternary complex factor MIP1
TraesCS3D02G355900	cDEG	14	26	24	2	92.3077	AT1G07430	AIP1	Protein phosphatase 2C 3	LOC_Os01g62760	protein phosphatase 2C
TraesCS1A02G419000	cDEG	11	26	2	24	7.69231	AT2G21650	RL2	Protein RADIALIS-like 2	LOC_Os05g50340	MYB family transcription factor
TraesCS2B02G196500	cDEG	12	26	23	3	88.4615	AT3G51420	SSL4	Protein STRICTOSIDINE SYNTHASE-LIKE 4	LOC_Os07g42250	strictosidine synthase
TraesCS4A02G007900	cDEG	13	26	19	7	73.0769	AT1G74950	TIFY10B	Protein TIFY 10B	LOC_Os03g08320	ZIM domain containing protein
TraesCS7D02G204600	mDEG	9	26	13	13	50	AT3G43440	TIFY3A	Protein TIFY 3A	LOC_Os10g25230	ZIM domain containing protein
TraesCS2A02G286700	mDEG	10	26	13	13	50	AT5G13220	TIFY9	Protein TIFY 9	LOC_Os04g32480	zinc-finger protein
TraesCS3A02G141500	cDEG	14	26	8	18	30.7692	AT1G29050	TBL38	Protein trichome birefringence-like 38	LOC_Os01g11810	powdery mildew resistant protein 5
TraesCS4A02G187600	cDEG	14	26	22	4	84.6154	AT5G13750	ZIFL1	Protein ZINC INDUCED FACILITATOR-LIKE 1	LOC_Os11g04104	major facilitator superfamily antiporter
TraesCS3B02G524500	cDEG	12	26	15	11	57.6923	AT1G65680	EXPB2	Putative expansin-B2	LOC_Os03g01270	expansin precursor
TraesCS2D02G311900	cDEG	14	26	23	3	88.4615	AT4G05490	FBL22	Putative F-box/LRR-repeat protein 22	LOC_Os08g09450	OsFBL41 - F-box domain and LRR containing protein
TraesCS2A02G375100	cDEG	12	26	3	23	11.5385	AT5G23370		Putative GEM-like protein 8	LOC_Os04g44510	GEM
TraesCS2D02G371600	cDEG	12	26	3	23	11.5385	AT5G23370		Putative GEM-like protein 8	LOC_Os04g44510	GEM
TraesCS2A02G440500	cDEG	13	26	19	7	73.0769	AT5G48485	DIR1	Putative lipid-transfer protein DIR1	LOC_Os07g18990	LTPL40 - Protease inhibitor/seed storage/LTP family protein precursor
TraesCS2D02G438400	cDEG	12	26	19	7	73.0769	AT5G48485	DIR1	Putative lipid-transfer protein DIR1	LOC_Os07g18990	LTPL40 - Protease inhibitor/seed storage/LTP family protein precursor
TraesCS7D02G457300	cDEG	14	26	22	4	84.6154	AT1G14600		Putative Myb family transcription factor At1g14600	LOC_Os06g45890	MYB family transcription factor
TraesCS4B02G262900	cDEG	13	26	15	11	57.6923	AT2G16120	PLT1	Putative polyol transporter 1	LOC_Os03g10090	transporter family protein
TraesCS2A02G268800	cDEG	14	26	18	8	69.2308	AT5G01410	PDX13	Pyridoxal 5'-phosphate synthase subunit PDX1.3	LOC_Os07g01020	SOR/SNZ family protein
TraesCS4B02G306900	cDEG	13	26	24	2	92.3077	AT2G44610	RABH1B	Ras-related protein RABH1b	LOC_Os03g09140	ras-related protein
TraesCS2A02G453300	cDEG	12	26	12	14	46.1538	AT3G51550	FER	Receptor-like protein kinase FERONIA	LOC_Os04g49690	FERONIA receptor-like kinase
TraesCS5A02G353400	cDEG	13	26	23	3	88.4615	AT1G07750		RmlC-like cupins superfamily protein	LOC_Os09g37976	cupin domain containing protein
TraesCS4D02G225900	cDEG	13	26	3	23	11.5385	AT1G20880		RNA-binding (RRM/RBD/RNP motifs) family protein	LOC_Os03g14190	RNA recognition motif containing protein
TraesCS3A02G244400	cDEG	12	26	19	7	73.0769	AT5G10830		S-adenosyl-L-methionine-dependent methyltransferases superfamily protein	LOC_Os01g51870	methyltransferase
TraesCS7D02G174300	cDEG	13	26	22	4	84.6154	AT1G07530	SCL14	Scarecrow-like protein 14	LOC_Os11g47870	GRAS family transcription factor domain containing protein
TraesCS2D02G165500	cDEG	14	26	24	2	92.3077	AT5G43580		Serine protease inhibitor%2C potato inhibitor I-type family protein	LOC_Os01g42860	inhibitor I family protein
TraesCS3A02G093900	cDEG	13	26	22	4	84.6154	AT2G38870		Serine protease inhibitor%2C potato inhibitor I-type family protein	LOC_Os12g25090	expressed protein
TraesCS6B02G401100	cDEG	11	26	20	6	76.9231	AT5G11090		serine-rich protein-related	LOC_Os02g55610	serine-rich protein
TraesCS4A02G436000	cDEG	14	26	22	4	84.6154	AT1G47710		Serpin-ZX	LOC_Os05g43590	serpin domain containing protein
TraesCS1B02G107300	cDEG	13	26	25	1	96.1538	AT5G48930	HST	Shikimate O-hydroxycinnamoyltransferase	LOC_Os10g23820	transferase family protein
TraesCS1B02G107400	cDEG	12	26	25	1	96.1538	AT5G48930	HST	Shikimate O-hydroxycinnamoyltransferase	LOC_Os10g23820	transferase family protein
TraesCS5B02G304300	cDEG	12	26	23	3	88.4615	AT5G48930	HST	Shikimate O-hydroxycinnamoyltransferase	LOC_Os09g37180	transferase family protein
TraesCS7A02G150100	cDEG	11	26	21	5	80.7692	AT5G48930	HST	Shikimate O-hydroxycinnamoyltransferase	LOC_Os06g08640	transferase family protein
TraesCS3B02G397400	cDEG	14	26	20	6	76.9231	AT2G37970	SOUL-1	SOUL heme-binding family protein	LOC_Os01g63210	SOUL heme-binding protein
TraesCS7B02G015200	cDEG	11	26	21	5	80.7692	AT4G10520		Subtilase family protein	LOC_Os02g17080	OsSub16 - Putative Subtilisin homologue
TraesCS1D02G272900	cDEG	13	26	7	19	26.9231	AT5G67090		Subtilisin-like serine endopeptidase family protein	LOC_Os05g36010	OsSub47 - Putative Subtilisin homologue
TraesCS4B02G339800	cDEG	12	26	25	1	96.1538	AT1G19450		Sugar transporter ERD6-like 4	LOC_Os05g49270	transporter family protein
TraesCS7D02G437000	cDEG	12	26	25	1	96.1538	AT5G04220	SYT3	Synaptotagmin-3	LOC_Os09g36770	NTMC2Type1.2 protein
TraesCS6D02G008400	cDEG	13	26	17	9	65.3846	AT5G66170	STR18	Thiosulfate sulfurtransferase 18	LOC_Os12g24020	rhodanese-like domain containing protein
TraesCS7B02G055200	cDEG	11	26	23	3	88.4615	AT5G66170	STR18	Thiosulfate sulfurtransferase 18	LOC_Os02g01220	rhodanese-like domain containing protein
TraesCS5B02G261500	cDEG	14	26	10	16	38.4615	AT5G47560	TDT	Tonoplast dicarboxylate transporter	LOC_Os09g31130	citrate transporter
TraesCS4D02G056900	cDEG	12	26	4	22	15.3846	AT2G22750	BHLH18	Transcription factor bHLH18	LOC_Os03g51580	helix-loop-helix DNA-binding domain containing protein
TraesCS5B02G235200	cDEG	11	26	17	9	65.3846	AT3G50330	HEC2	Transcription factor HEC2	LOC_Os09g28210	bHelix-loop-helix transcription factor
TraesCS1B02G100400	cDEG	13	26	16	10	61.5385	AT1G09530	PIF3	Transcription factor PIF3	LOC_Os05g04740	helix-loop-helix DNA-binding domain containing protein
TraesCS5D02G060300	cDEG	13	26	7	19	26.9231	AT2G43010	PIF4	Transcription factor PIF4	LOC_Os12g41650	helix-loop-helix DNA-binding domain containing protein
TraesCS3A02G154900	cDEG	13	26	24	2	92.3077	AT3G06880		Transducin/WD40 repeat-like superfamily protein	LOC_Os01g12930	U-box domain containing protein
TraesCS2A02G075200	mDEG	10	26	24	2	92.3077	AT2G45290	TKL-2	Transketolase-2%2C chloroplastic	LOC_Os04g19740	transketolase
TraesCS3B02G434900	cDEG	12	26	20	6	76.9231	AT2G29150		Tropinone reductase homolog At2g29150	LOC_Os11g43200	tropinone reductase 2
TraesCS1B02G410300	cDEG	13	26	16	10	61.5385	AT5G06060		Tropinone reductase homolog At5g06060	LOC_Os11g43360	tropinone reductase 2
TraesCS3A02G401900	cDEG	13	26	22	4	84.6154	AT5G06060		Tropinone reductase homolog At5g06060	LOC_Os11g43200	tropinone reductase 2
TraesCS2D02G308000	cDEG	12	26	4	22	15.3846	AT1G59940	ARR3	Two-component response regulator ARR3	LOC_Os04g36070	OsRR1 type-A response regulator
TraesCS2B02G582300	cDEG	12	26	5	21	19.2308	AT5G62920	ARR6	Two-component response regulator ARR6	LOC_Os04g57720	OsRR6 type-A response regulator
TraesCS7D02G383500	cDEG	12	26	25	1	96.1538	AT2G20340	ELI5	Tyrosine decarboxylase 1	LOC_Os08g04540	decarboxylase
TraesCS5D02G288700	cDEG	13	26	15	11	57.6923	AT3G23820	GAE6	UDP-glucuronate 4-epimerase 6	LOC_Os09g32670	UDP-glucuronate 4-epimerase
TraesCS2D02G029800	cDEG	15	26	18	8	69.2308	AT2G15490	UGT73B4	UDP-glycosyltransferase 73B4	LOC_Os05g42020	UDP-glucoronosyl and UDP-glucosyl transferase domain containing protein
TraesCS3B02G144400	cDEG	15	26	18	8	69.2308	AT2G36750	UGT73C1	UDP-glycosyltransferase 73C1	LOC_Os01g08110	flavonol-3-O-glycoside-7-O-glucosyltransferase 1
TraesCS5D02G312100	cDEG	15	26	22	4	84.6154	AT1G05675	UGT74E1	UDP-glycosyltransferase 74E1	LOC_Os09g34250	UDP-glucoronosyl and UDP-glucosyl transferase domain containing protein
TraesCS2D02G055200	cDEG	12	26	23	3	88.4615	AT2G43820	UGT74F2	UDP-glycosyltransferase 74F2	LOC_Os04g12970	UDP-glucoronosyl/UDP-glucosyl transferase
TraesCS5D02G076400	cDEG	12	26	22	4	84.6154	AT2G43820	UGT74F2	UDP-glycosyltransferase 74F2	LOC_Os04g12960	UDP-glucoronosyl/UDP-glucosyl transferase
TraesCS7D02G439400	cDEG	14	26	23	3	88.4615	AT4G15550	UGT75D1	UDP-glycosyltransferase 75D1	LOC_Os02g10880	UDP-glucoronosyl and UDP-glucosyl transferase domain containing protein
TraesCS5D02G476400	cDEG	15	26	23	3	88.4615	AT5G49690	UGT91C1	UDP-glycosyltransferase 91C1	LOC_Os10g03320	UDP-glucoronosyl and UDP-glucosyl transferase domain containing protein
TraesCS3D02G461200	cDEG	11	26	22	4	84.6154	AT3G11340		UDP-Glycosyltransferase superfamily protein	LOC_Os07g13800	cytokinin-N-glucosyltransferase
TraesCS7A02G210200	cDEG	13	26	22	4	84.6154	AT5G14860		UDP-Glycosyltransferase superfamily protein	LOC_Os06g16000	UDP-glucoronosyl and UDP-glucosyl transferase
TraesCS6A02G093300	cDEG	13	26	2	24	7.69231	AT5G40450		unknown protein%3B FUNCTIONS IN: molecular_function unknown%3B INVOLVED IN: biological_process unknown%3B LOCATED IN: chloroplast%2C plasma membrane%3B EXPRESSED IN: 24 plant structures%3B EXPRESSED DURING: 13 growth stages%3B Has 30201 Blast hits to 17322 protei /.../780 species: Archae - 12%3B Bacteria - 1396%3B Metazoa - 17338%3B Fungi - 3422%3B Plants - 5037%3B Viruses - 0%3B Other Eukaryotes…	LOC_Os02g03840	expressed protein
TraesCS3D02G357600	cDEG	15	26	12	14	46.1538	AT3G55646		unknown protein%3B FUNCTIONS IN: molecular_function unknown%3B INVOLVED IN: biological_process unknown%3B LOCATED IN: chloroplast%3B BEST Arabidopsis thaliana protein match is: unknown protein (TAIR:AT2G39855.2)%3B Has 35333 Blast hits to 34131 proteins in 24 /.../cies: Archae - 798%3B Bacteria - 22429%3B Metazoa - 974%3B Fungi - 991%3B Plants - 531%3B Viruses - 0%3B Other Eukaryotes - 9610 (sour…	LOC_Os01g62970	expressed protein
TraesCS3D02G162800	cDEG	13	26	0	26	0	AT2G20080		unknown protein%3B FUNCTIONS IN: molecular_function unknown%3B INVOLVED IN: biological_process unknown%3B LOCATED IN: chloroplast%3B BEST Arabidopsis thaliana protein match is: unknown protein (TAIR:AT4G28840.1)%3B Has 35333 Blast hits to 34131 proteins in 24 /.../cies: Archae - 798%3B Bacteria - 22429%3B Metazoa - 974%3B Fungi - 991%3B Plants - 531%3B Viruses - 0%3B Other Eukaryotes - 9610 (sour…	LOC_Os01g13040	expressed protein
TraesCS1A02G116900	cDEG	11	26	5	21	19.2308	AT3G15630		unknown protein%3B FUNCTIONS IN: molecular_function unknown%3B INVOLVED IN: biological_process unknown%3B LOCATED IN: chloroplast%3B EXPRESSED IN: 24 plant structures%3B EXPRESSED DURING: 15 growth stages%3B BEST Arabidopsis thaliana protein match is: unknown p /.../ (TAIR:AT1G52720.1)%3B Has 61 Blast hits to 61 proteins in 13 species: Archae - 0%3B Bacteria - 0%3B Metazoa - 0%3B Fungi - 0%3B Pla…	LOC_Os05g08420	expressed protein
TraesCS1D02G118100	cDEG	13	26	6	20	23.0769	AT3G15630		unknown protein%3B FUNCTIONS IN: molecular_function unknown%3B INVOLVED IN: biological_process unknown%3B LOCATED IN: chloroplast%3B EXPRESSED IN: 24 plant structures%3B EXPRESSED DURING: 15 growth stages%3B BEST Arabidopsis thaliana protein match is: unknown p /.../ (TAIR:AT1G52720.1)%3B Has 61 Blast hits to 61 proteins in 13 species: Archae - 0%3B Bacteria - 0%3B Metazoa - 0%3B Fungi - 0%3B Pla…	LOC_Os05g08420	expressed protein
TraesCS3B02G239400	cDEG	12	26	11	15	42.3077	AT5G12010		unknown protein%3B INVOLVED IN: response to salt stress%3B LOCATED IN: chloroplast%2C plasma membrane%2C membrane%3B EXPRESSED IN: 23 plant structures%3B EXPRESSED DURING: 13 growth stages%3B BEST Arabidopsis thaliana protein match is: unknown protein (TAIR:AT4G2 /.../)%3B Has 1807 Blast hits to 1807 proteins in 277 species: Archae - 0%3B Bacteria - 0%3B Metazoa - 736%3B Fungi - 347%3B Plants - 3…	LOC_Os01g40070	expressed protein
TraesCS3D02G212000	cDEG	12	26	13	13	50	AT5G12010		unknown protein%3B INVOLVED IN: response to salt stress%3B LOCATED IN: chloroplast%2C plasma membrane%2C membrane%3B EXPRESSED IN: 23 plant structures%3B EXPRESSED DURING: 13 growth stages%3B BEST Arabidopsis thaliana protein match is: unknown protein (TAIR:AT4G2 /.../)%3B Has 1807 Blast hits to 1807 proteins in 277 species: Archae - 0%3B Bacteria - 0%3B Metazoa - 736%3B Fungi - 347%3B Plants - 3…	LOC_Os01g40070	expressed protein
TraesCS5B02G362500	cDEG	11	26	21	5	80.7692	AT4G30650		UPF0057 membrane protein At4g30650	LOC_Os09g38560	OsRCI2-11 - Hydrophobic protein OSR8
TraesCS2D02G105100	cDEG	13	26	25	1	96.1538	AT2G14740	VSR3	Vacuolar-sorting receptor 3	LOC_Os07g48229	vacuolar-sorting receptor precursor
TraesCS6D02G362200	cDEG	13	26	3	23	11.5385	AT1G21270	WAK2	Wall-associated receptor kinase 2	LOC_Os02g56630	OsWAK24 - OsWAK receptor-like protein kinase
TraesCS6A02G225300	cDEG	13	26	19	7	73.0769	AT1G21230	WAK5	Wall-associated receptor kinase 5	LOC_Os02g41500	OsWAK13 - OsWAK receptor-like protein kinase
TraesCS3A02G122300	cDEG	13	26	19	7	73.0769	AT5G02070	WAKL20	Wall-associated receptor kinase-like 20	LOC_Os05g25390	tyrosine protein kinase domain containing protein
TraesCS3D02G124200	cDEG	14	26	19	7	73.0769	AT5G02070	WAKL20	Wall-associated receptor kinase-like 20	LOC_Os05g25390	tyrosine protein kinase domain containing protein
TraesCS1D02G104500	cDEG	14	26	14	12	53.8462	AT5G64700		WAT1-related protein At5g64700	LOC_Os05g01570	auxin-induced protein 5NG4
TraesCS3B02G275100	cDEG	13	26	15	11	57.6923	AT3G12630	SAP5	Zinc finger A20 and AN1 domain-containing stress-associated protein 5	LOC_Os01g52030	zinc finger A20 and AN1 domain-containing stress-associated protein
TraesCS3A02G107200	cDEG	13	26	14	12	53.8462	AT2G19810		Zinc finger CCCH domain-containing protein 20	LOC_Os01g09620	zinc finger/CCCH transcription factor
TraesCS1B02G285900	cDEG	13	26	21	5	80.7692	AT3G20880	WIP4	Zinc finger protein WIP4	LOC_Os05g37190	ZOS5-08 - C2H2 zinc finger protein
TraesCS5D02G491000	cDEG	16	26	18	8	69.2308	AT5G59820	ZAT12	Zinc finger protein ZAT12	LOC_Os03g60560	ZOS3-21 - C2H2 zinc finger protein
TraesCS1B02G101900	cDEG	11	26	24	2	92.3077
TraesCS1D02G233800	cDEG	12	26	20	6	76.9231
TraesCS3D02G536600	cDEG	13	26	6	20	23.0769
TraesCS5A02G369800	cDEG	13	26	24	2	92.3077
TraesCS5A02G392100	cDEG	11	26	26	0	100
TraesCS6A02G284000	cDEG	13	26	21	5	80.7692
TraesCS7A02G364800	cDEG	12	26	18	8	69.2308
TraesCS4B02G212300	cDEG	11	25	20	5	80	AT3G46230	HSP17.4A	17.4 kDa class I heat shock protein	LOC_Os03g16020	hsp20/alpha crystallin family protein
TraesCS6B02G374100	cDEG	14	25	24	1	96	AT1G54050	HSP17.4B	17.4 kDa class III heat shock protein	LOC_Os02g54140	hsp20/alpha crystallin family protein
TraesCS7D02G232600	cDEG	11	25	15	10	60	AT5G51440	HSP23.5	23.5 kDa heat shock protein%2C mitochondrial	LOC_Os06g11610	heat shock 22 kDa protein
TraesCS6A02G316200	cDEG	12	25	13	12	52	AT4G25200	HSP23.6	23.6 kDa heat shock protein%2C mitochondrial	LOC_Os02g52150	heat shock 22 kDa protein
TraesCS5A02G515600	cDEG	11	25	14	11	56	AT5G24530	DMR6	2-oxoglutarate (2OG) and Fe(II)-dependent oxygenase superfamily protein	LOC_Os03g03034	flavonol synthase/flavanone 3-hydroxylase
TraesCS6D02G190400	cDEG	13	25	22	3	88	AT1G14130		2-oxoglutarate (2OG) and Fe(II)-dependent oxygenase superfamily protein	LOC_Os04g39980	gibberellin 20 oxidase 2
TraesCS2B02G275100	cDEG	13	25	13	12	52	AT4G04610	2025-04-01	5'-adenylylsulfate reductase 1%2C chloroplastic	LOC_Os07g32570	OsAPRL1 adenosine 5'-phosphosulfate reductase-like OsAPRL1
TraesCS3B02G148100	cDEG	12	25	21	4	84	AT3G13080	ABCC3	ABC transporter C family member 3	LOC_Os01g07870	ABC transporter family protein
TraesCS7D02G364700	cDEG	12	25	21	4	84	AT3G21250	ABCC8	ABC transporter C family member 8	LOC_Os06g36650	ABC transporter family protein
TraesCS2B02G472800	cDEG	13	25	23	2	92	AT3G60160	ABCC9	ABC transporter C family member 9	LOC_Os04g49890	multidrug resistance-associated protein
TraesCS4A02G216900	cDEG	14	25	21	4	84	AT1G71960	ABCG25	ABC transporter G family member 25	LOC_Os11g07600	ABC-2 type transporter domain containing protein
TraesCS5A02G016200	cDEG	14	25	18	7	72	AT1G66950	ABCG39	ABC transporter G family member 39	LOC_Os07g33780	pleiotropic drug resistance protein 5
TraesCS3A02G348400	cDEG	13	25	1	24	4	AT2G38310	PYL4	Abscisic acid receptor PYL4	LOC_Os05g39580	bet v I allergen family protein
TraesCS3B02G380300	cDEG	12	25	0	25	0	AT5G05440	PYL5	Abscisic acid receptor PYL5	LOC_Os05g39580	bet v I allergen family protein
TraesCS6A02G023100	cDEG	13	25	12	13	48	AT1G62660	BFRUCT3	Acid beta-fructofuranosidase 3%2C vacuolar	LOC_Os02g01590	glycosyl hydrolases
TraesCS2D02G450600	cDEG	12	25	23	2	92	AT5G24090	CHIB1	Acidic endochitinase	LOC_Os04g27980	glycosyl hydrolase
TraesCSU02G026200	cDEG	11	25	22	3	88	AT5G24090	CHIB1	Acidic endochitinase	LOC_Os06g25010	glycosyl hydrolase
TraesCS5A02G478800	cDEG	12	25	23	2	92	AT1G01750	ADF10	Actin-depolymerizing factor 10	LOC_Os03g60580	actin-depolymerizing factor
TraesCS5B02G491500	cDEG	13	25	11	14	44	AT5G59880	ADF3	Actin-depolymerizing factor 3	LOC_Os03g60580	actin-depolymerizing factor
TraesCS4B02G106300	cDEG	13	25	20	5	80	AT1G77120	ADH1	Alcohol dehydrogenase class-P	LOC_Os11g10510	dehydrogenase
TraesCS3B02G395600	cDEG	13	25	22	3	88	AT2G37790	AKR4C10	Aldo-keto reductase family 4 member C10	LOC_Os01g62870	oxidoreductase
TraesCS1B02G196900	cDEG	15	25	23	2	92	AT2G36290		alpha/beta-Hydrolases superfamily protein	LOC_Os10g37720	hydrolase
TraesCS1D02G187100	cDEG	11	25	18	7	72	AT2G36290		alpha/beta-Hydrolases superfamily protein	LOC_Os10g37710	hydrolase
TraesCS1D02G368900	cDEG	13	25	9	16	36	AT5G53050		alpha/beta-Hydrolases superfamily protein	LOC_Os05g46460	hydrolase
TraesCS1B02G182000	cDEG	14	25	21	4	84	AT5G08380	AGAL1	Alpha-galactosidase 1	LOC_Os10g35070	alpha-galactosidase precursor
TraesCS4B02G100800	cDEG	14	25	22	3	88	AT1G77380	AAP3	Amino acid permease 3	LOC_Os01g66010	amino acid transporter
TraesCS4D02G097400	cDEG	13	25	18	7	72	AT1G77380	AAP3	Amino acid permease 3	LOC_Os01g66010	amino acid transporter
TraesCS6A02G363400	mDEG	10	25	15	10	60	AT4G11000		Ankyrin repeat family protein	LOC_Os06g19010	cadmium tolerance factor
TraesCS6B02G396700	cDEG	14	25	18	7	72	AT4G03450		Ankyrin repeat family protein	LOC_Os06g19110	cadmium tolerance factor
TraesCS7B02G123900	cDEG	12	25	17	8	68	AT4G11000		Ankyrin repeat family protein	LOC_Os06g18900	cadmium tolerance factor
TraesCS4D02G357100	cDEG	13	25	3	22	12	AT3G04080	APY1	Apyrase 1	LOC_Os11g03290	nucleoside-triphosphatase
TraesCS7A02G553000	cDEG	11	25	9	16	36	AT4G18910	NIP1-2	Aquaporin NIP1-2	LOC_Os05g11560	aquaporin protein
TraesCS7D02G189400	cDEG	12	25	20	5	80	AT5G15250	FTSH6	ATP-dependent zinc metalloprotease FTSH 6%2C chloroplastic	LOC_Os06g12370	OsFtsH6 FtsH protease
TraesCS5A02G354300	cDEG	14	25	13	12	52	AT5G65980		Auxin efflux carrier family protein	LOC_Os09g38130	auxin efflux carrier component
TraesCS5D02G538900	cDEG	11	25	21	4	84	AT2G02850	ARPN	Basic blue protein	LOC_Os03g63390	plastocyanin-like domain containing protein
TraesCS1D02G249600	cDEG	13	25	22	3	88	AT3G12500	CHI-B	Basic endochitinase B	LOC_Os05g33130	CHIT17 - Chitinase family protein precursor
TraesCS3B02G328400	cDEG	13	25	3	22	12	AT3G58120	BZIP61	Basic leucine zipper 61	LOC_Os01g55150	bZIP transcription factor domain containing protein
TraesCS4B02G323900	cDEG	12	25	18	7	72	AT1G65880	AAE20	Benzoate--CoA ligase%2C peroxisomal	LOC_Os03g03790	AMP-binding domain containing protein
TraesCS7B02G354800	cDEG	14	25	8	17	32	AT3G01500	BCA1	Beta carbonic anhydrase 1%2C chloroplastic	LOC_Os01g45274	carbonic anhydrase
TraesCS5A02G513200	cDEG	14	25	21	4	84	AT3G23920	BAM1	Beta-amylase 1%2C chloroplastic	LOC_Os03g04770	beta-amylase
TraesCS1D02G052700	cDEG	14	25	5	20	20	AT3G48740	SWEET11	Bidirectional sugar transporter SWEET11	LOC_Os11g31190	nodulin MtN3 family protein
TraesCS3A02G364300	cDEG	12	25	23	2	92	AT5G05960		Bifunctional inhibitor/lipid-transfer protein/seed storage 2S albumin superfamily protein	LOC_Os01g62980	LTPL101 - Protease inhibitor/seed storage/LTP family protein precursor
TraesCS3D02G350100	cDEG	13	25	22	3	88	AT2G28710		C2H2-type zinc finger family protein	LOC_Os01g62130	ZOS1-14 - C2H2 zinc finger protein
TraesCS4A02G123100	cDEG	15	25	15	10	60	AT5G49480	ATCP1	Ca2+-binding protein 1	LOC_Os03g19720	EF hand family protein
TraesCS4D02G182800	cDEG	13	25	17	8	68	AT5G49480	ATCP1	Ca2+-binding protein 1	LOC_Os03g19720	EF hand family protein
TraesCS5A02G262400	mDEG	10	25	16	9	64	AT2G44310		Calcium-binding EF-hand family protein	LOC_Os09g31040	EF hand family protein
TraesCS1D02G082500	cDEG	12	25	14	11	56	AT3G17510	CIPK1	CBL-interacting serine/threonine-protein kinase 1	LOC_Os05g04550	CAMK_KIN1/SNF1/Nim1_like.3 - CAMK includes calcium/calmodulin depedent protein kinases
TraesCS2D02G107100	cDEG	12	25	13	12	52	AT5G01820	CIPK14	CBL-interacting serine/threonine-protein kinase 14	LOC_Os07g48090	CAMK_KIN1/SNF1/Nim1_like.30 - CAMK includes calcium/calmodulin depedent protein kinases
TraesCS5A02G459200	cDEG	12	25	22	3	88	AT5G19855		Chaperonin-like RbcX protein	LOC_Os03g59320	expressed protein
TraesCS3D02G238400	mDEG	10	25	4	21	16	AT5G41790	CIP1	COP1-interactive protein 1	LOC_Os01g46810	viral A-type inclusion protein repeat containing protein
TraesCS2D02G330200	cDEG	12	25	16	9	64	AT4G05030		Copper transport protein family	LOC_Os04g39010	heavy metal associated domain containing protein
TraesCS5B02G246300	cDEG	11	25	19	6	76	AT1G22480		Cupredoxin superfamily protein	LOC_Os09g29390	plastocyanin-like domain containing protein
TraesCS5D02G255700	cDEG	13	25	21	4	84	AT3G60270		Cupredoxin superfamily protein	LOC_Os09g29390	plastocyanin-like domain containing protein
TraesCS1D02G363800	cDEG	12	25	15	10	60	AT5G63370	CDKG1	Cyclin-dependent kinase G1	LOC_Os12g23700	cyclin-dependent kinase G-2
TraesCS1B02G283400	cDEG	12	25	19	6	76	AT4G23180	CRK10	Cysteine-rich receptor-like protein kinase 10	LOC_Os05g41370	TKL_IRAK_DUF26-la.1 - DUF26 kinases have homology to DUF26 containing loci
TraesCS2D02G221500	cDEG	13	25	22	3	88	AT4G23180	CRK10	Cysteine-rich receptor-like protein kinase 10	LOC_Os07g35680	TKL_IRAK_DUF26-lc22 - DUF26 kinases have homology to DUF26 containing loci
TraesCS3D02G097000	cDEG	12	25	22	3	88	AT1G70520	CRK2	Cysteine-rich receptor-like protein kinase 2	LOC_Os01g36790	TKL_IRAK_DUF26-lf.2 - DUF26 kinases have homology to DUF26 containing loci
TraesCS1B02G045300	cDEG	13	25	20	5	80	AT5G48540	CRRSP55	Cysteine-rich repeat secretory protein 55	LOC_Os05g02200	cysteine-rich repeat secretory protein 55 precursor
TraesCS7B02G333700	cDEG	12	25	22	3	88	AT4G23280	CRK20	cysteine-rich RLK (RECEPTOR-like protein kinase) 20	LOC_Os06g47530	TKL_IRAK_DUF26-lh.6 - DUF26 kinases have homology to DUF26 containing loci
TraesCS1B02G464900	cDEG	12	25	19	6	76	AT3G50930	BCS1	cytochrome BC1 synthesis	LOC_Os05g51130	mitochondrial chaperone BCS1
TraesCS1D02G439400	cDEG	11	25	21	4	84	AT3G50930	BCS1	cytochrome BC1 synthesis	LOC_Os05g51130	mitochondrial chaperone BCS1
TraesCS2A02G053300	cDEG	12	25	18	7	72	AT1G13080	CYP71B2	Cytochrome P450 71B2	LOC_Os02g17760	cytochrome P450
TraesCS2D02G021500	cDEG	13	25	20	5	80	AT1G13080	CYP71B2	Cytochrome P450 71B2	LOC_Os02g17760	cytochrome P450
TraesCS2A02G019400	cDEG	11	25	21	4	84	AT3G26300	CYP71B34	Cytochrome P450 71B34	LOC_Os03g63310	cytochrome P450 71E1
TraesCS4A02G339000	mDEG	10	25	3	22	12	AT3G26300	CYP71B34	Cytochrome P450 71B34	LOC_Os03g63310	cytochrome P450 71E1
TraesCS2D02G029700	cDEG	14	25	18	7	72	AT3G26310	CYP71B35	Cytochrome P450 71B35	LOC_Os04g10160	cytochrome P450
TraesCS5A02G381100	cDEG	12	25	21	4	84	AT3G26330	CYP71B37	Cytochrome P450 71B37	LOC_Os09g10340	cytochrome P450
TraesCS7D02G512800	cDEG	12	25	23	2	92	AT3G14680	CYP72A14	Cytochrome P450 72A14	LOC_Os01g43710	cytochrome P450 72A1
TraesCS1A02G351600	cDEG	14	25	13	12	52	AT3G48520	CYP94B3	Cytochrome P450 94B3	LOC_Os11g29290	cytochrome P450
TraesCS1B02G371900	cDEG	14	25	15	10	60	AT3G48520	CYP94B3	Cytochrome P450 94B3	LOC_Os11g29290	cytochrome P450
TraesCS3D02G325300	cDEG	12	25	18	7	72	AT2G40890	CYP98A3	Cytochrome P450 98A3	LOC_Os05g41440	cytochrome P450
TraesCS1D02G403300	cDEG	12	25	24	1	96	AT2G30750	CYP71A12	cytochrome P450%2C family 71%2C subfamily A%2C polypeptide 12	LOC_Os06g43384	cytochrome P450
TraesCS2D02G261100	cDEG	13	25	19	6	76	AT4G37330	CYP81D4	cytochrome P450%2C family 81%2C subfamily D%2C polypeptide 4	LOC_Os03g55240	cytochrome P450
TraesCS3B02G525300	cDEG	13	25	17	8	68	AT2G41510	CKX1	Cytokinin dehydrogenase 1	LOC_Os01g71310	cytokinin dehydrogenase precursor
TraesCS1D02G154700	cDEG	12	25	16	9	64	AT2G37210	LOG3	Cytokinin riboside 5'-monophosphate phosphoribohydrolase LOG3	LOC_Os10g33900	possible lysine decarboxylase domain containing protein
TraesCS5A02G385900	cDEG	11	25	15	10	60	AT1G58170	DIR19	Dirigent protein 19	LOC_Os11g07690	dirigent
TraesCS5D02G395800	cDEG	13	25	14	11	56	AT1G58170	DIR19	Dirigent protein 19	LOC_Os11g07690	dirigent
TraesCS1D02G017500	cDEG	13	25	3	22	12	AT5G42500	DIR2	Dirigent protein 2	LOC_Os07g42570	dirigent
TraesCS6D02G367600	cDEG	11	25	10	15	40	AT2G35930	PUB23	E3 ubiquitin-protein ligase PUB23	LOC_Os02g33590	U-box domain-containing protein
TraesCS5A02G049400	cDEG	12	25	7	18	28	AT4G27470	RMA3	E3 ubiquitin-protein ligase RMA3	LOC_Os02g42690	zinc finger
TraesCS7D02G088800	cDEG	12	25	16	9	64	AT5G25940		early nodulin-related	LOC_Os06g04990	early nodulin 93 ENOD93 protein
TraesCS2B02G445500	cDEG	12	25	18	7	72	AT4G02780	GA1	Ent-copalyl diphosphate synthase%2C chloroplastic	LOC_Os04g09900	ent-kaurene synthase
TraesCS6A02G235100	cDEG	13	25	19	6	76	AT2G20880	ERF053	Ethylene-responsive transcription factor ERF053	LOC_Os02g42585	AP2 domain containing protein
TraesCS4B02G299600	cDEG	13	25	8	17	32	AT1G72360	ERF073	Ethylene-responsive transcription factor ERF073	LOC_Os03g08500	AP2 domain containing protein
TraesCS7D02G469200	cDEG	13	25	24	1	96	AT1G22190	RAP2-13	Ethylene-responsive transcription factor RAP2-13	LOC_Os08g31580	ethylene-responsive transcription factor
TraesCS4D02G094200	cDEG	12	25	13	12	52	AT4G33490		Eukaryotic aspartyl protease family protein	LOC_Os11g08100	eukaryotic aspartyl protease domain containing protein
TraesCS7B02G444800	cDEG	12	25	14	11	56	AT3G59080		Eukaryotic aspartyl protease family protein	LOC_Os02g21040	aspartic proteinase nepenthesin precursor
TraesCS7D02G475300	cDEG	13	25	14	11	56	AT5G10770		Eukaryotic aspartyl protease family protein	LOC_Os02g48870	aspartic proteinase nepenthesin-2 precursor
TraesCS3B02G376900	cDEG	13	25	9	16	36	AT1G69530	EXPA1	Expansin-A1	LOC_Os01g60770	expansin precursor
TraesCS2A02G066600	cDEG	13	25	4	21	16	AT1G20190	EXPA11	Expansin-A11	LOC_Os04g15840	expansin precursor
TraesCS6D02G231200	mDEG	10	25	20	5	80	AT2G45110	EXPB4	Expansin-B4	LOC_Os02g44108	expansin precursor
TraesCS4A02G034500	cDEG	11	25	17	8	68	AT4G38540		FAD/NAD(P)-binding oxidoreductase family protein	LOC_Os03g05920	expressed protein
TraesCS5A02G231300	cDEG	13	25	17	8	68	AT1G55230		Family of unknown function (DUF716)	LOC_Os09g27260	plant viral response family protein
TraesCS3A02G390000	cDEG	14	25	16	9	64	AT5G07610		F-box protein At5g07610	LOC_Os01g65510	OsFBX31 - F-box domain containing protein
TraesCS7B02G245500	mDEG	10	25	22	3	88	AT5G54160	OMT1	Flavone 3'-O-methyltransferase 1	LOC_Os08g06100	O-methyltransferase
TraesCS3A02G176100	mDEG	10	25	25	0	100	AT5G24860	FPF1	Flowering-promoting factor 1	LOC_Os01g15340	flowering promoting factor-like 1
TraesCS6D02G255200	cDEG	13	25	20	5	80	AT5G14780	FDH1	Formate dehydrogenase%2C mitochondrial	LOC_Os06g29220	erythronate-4-phosphate dehydrogenase domain containing protein
TraesCS7B02G130600	cDEG	12	25	21	4	84	AT5G14780	FDH1	Formate dehydrogenase%2C mitochondrial	LOC_Os06g29180	erythronate-4-phosphate dehydrogenase domain containing protein
TraesCS4B02G179300	cDEG	12	25	24	1	96	AT2G47180	GOLS1	Galactinol synthase 1	LOC_Os03g20120	glycosyl transferase 8 domain containing protein
TraesCS3A02G378700	cDEG	13	25	20	5	80	AT1G03970	GBF4	G-box-binding factor 4	LOC_Os01g64730	bZIP transcription factor domain containing protein
TraesCS2B02G392100	cDEG	11	25	4	21	16	AT5G08350		GEM-like protein 4	LOC_Os04g44510	GEM
TraesCS2D02G371400	cDEG	11	25	1	24	4	AT5G08350		GEM-like protein 4	LOC_Os04g44510	GEM
TraesCS4B02G377000	cDEG	14	25	17	8	68	AT5G39110	GLP6	Germin-like protein subfamily 1 member 14	LOC_Os08g08990	Cupin domain containing protein
TraesCS4B02G378200	cDEG	12	25	17	8	68	AT5G39110	GLP6	Germin-like protein subfamily 1 member 14	LOC_Os08g09080	Cupin domain containing protein
TraesCS5A02G543700	cDEG	11	25	19	6	76	AT5G39110	GLP6	Germin-like protein subfamily 1 member 14	LOC_Os08g08990	Cupin domain containing protein
TraesCSU02G128500	cDEG	12	25	22	3	88	AT5G39110	GLP6	Germin-like protein subfamily 1 member 14	LOC_Os08g08990	Cupin domain containing protein
TraesCSU02G145500	cDEG	11	25	22	3	88	AT5G39110	GLP6	Germin-like protein subfamily 1 member 14	LOC_Os08g08990	Cupin domain containing protein
TraesCSU02G145600	cDEG	12	25	22	3	88	AT5G39110	GLP6	Germin-like protein subfamily 1 member 14	LOC_Os08g08990	Cupin domain containing protein
TraesCSU02G152000	cDEG	12	25	19	6	76	AT5G39110	GLP6	Germin-like protein subfamily 1 member 14	LOC_Os08g08990	Cupin domain containing protein
TraesCS5A02G044300	cDEG	14	25	21	4	84	AT5G39120		Germin-like protein subfamily 1 member 15	LOC_Os08g08980	cupin domain containing protein
TraesCS7D02G383300	cDEG	13	25	25	0	100	AT5G39120		Germin-like protein subfamily 1 member 15	LOC_Os08g08980	cupin domain containing protein
TraesCSU02G145300	cDEG	11	25	19	6	76	AT5G39120		Germin-like protein subfamily 1 member 15	LOC_Os08g08990	Cupin domain containing protein
TraesCS3A02G294000	cDEG	14	25	20	5	80	AT1G78440	GA2OX1	Gibberellin 2-beta-dioxygenase 1	LOC_Os01g55240	gibberellin 2-beta-dioxygenase
TraesCS4D02G251000	cDEG	11	25	23	2	92	AT3G13560		Glucan endo-1%2C3-beta-glucosidase 4	LOC_Os03g25790	glycosyl hydrolases family 17 protein
TraesCS3A02G480300	cDEG	11	25	2	23	8	AT3G57260	BG2	Glucan endo-1%2C3-beta-glucosidase%2C acidic isoform	LOC_Os01g71380	glycosyl hydrolases family 17
TraesCS3A02G105300	cDEG	11	25	20	5	80	AT5G11930	GRXC10	Glutaredoxin-C10	LOC_Os01g09830	OsGrx_A2 - glutaredoxin subgroup III
TraesCS3A02G246700	cDEG	12	25	13	12	52	AT1G28480	GRXC9	Glutaredoxin-C9	LOC_Os01g47760	OsGrx_I1 - glutaredoxin subgroup III
TraesCS1A02G102700	cDEG	13	25	23	2	92	AT3G62760	GSTF13	Glutathione S-transferase F13	LOC_Os01g27210	glutathione S-transferase
TraesCS1A02G102900	cDEG	13	25	20	5	80	AT3G62760	GSTF13	Glutathione S-transferase F13	LOC_Os05g05620	glutathione S-transferase
TraesCS1B02G113500	cDEG	12	25	23	2	92	AT3G62760	GSTF13	Glutathione S-transferase F13	LOC_Os01g27210	glutathione S-transferase
TraesCSU02G122000	cDEG	12	25	19	6	76	AT4G19880		Glutathione S-transferase family protein	LOC_Os02g21460	uncharacterized protein yqjG
TraesCS4D02G200700	cDEG	13	25	21	4	84	AT5G02790	GSTL3	Glutathione S-transferase L3	LOC_Os03g17480	IN2-1 protein
TraesCS1A02G186800	cDEG	12	25	22	3	88	AT1G10360	GSTU18	Glutathione S-transferase U18	LOC_Os10g38470	glutathione S-transferase
TraesCS2D02G545400	cDEG	12	25	22	3	88	AT1G10360	GSTU18	Glutathione S-transferase U18	LOC_Os10g38470	glutathione S-transferase
TraesCS5B02G426300	cDEG	13	25	22	3	88	AT1G17180	GSTU25	Glutathione S-transferase U25	LOC_Os03g57200	glutathione S-transferase
TraesCS1D02G237500	cDEG	13	25	12	13	48	AT4G16260		Glycosyl hydrolase superfamily protein	LOC_Os05g31140	glycosyl hydrolases family 17
TraesCS3A02G483100	cDEG	11	25	22	3	88	AT4G16260		Glycosyl hydrolase superfamily protein	LOC_Os01g71670	glycosyl hydrolases family 17
TraesCS7B02G364700	cDEG	11	25	4	21	16	AT5G11720		Glycosyl hydrolases family 31 protein	LOC_Os06g46284	glycosyl hydrolase
TraesCS3B02G556500	cDEG	15	25	20	5	80	AT2G41640		Glycosyltransferase family 61 protein	LOC_Os01g72610	glycosyltransferase
TraesCS4D02G035700	cDEG	12	25	17	8	68	AT2G32150		Haloacid dehalogenase-like hydrolase (HAD) superfamily protein	LOC_Os03g49440	phosphatase
TraesCS4D02G208800	cDEG	13	25	17	8	68	AT5G02230		Haloacid dehalogenase-like hydrolase (HAD) superfamily protein	LOC_Os03g16670	haloacid dehalogenase-like hydrolase family protein
TraesCS4B02G385800	cDEG	13	25	24	1	96	AT3G24520	HSFC1	Heat stress transcription factor C-1	LOC_Os02g13800	HSF-type DNA-binding domain containing protein
TraesCS2B02G569600	cDEG	12	25	21	4	84	AT1G01490		Heavy metal transport/detoxification superfamily protein	LOC_Os04g57200	heavy metal transport/detoxification protein
TraesCS2D02G540700	cDEG	11	25	16	9	64	AT1G01490		Heavy metal transport/detoxification superfamily protein	LOC_Os04g57200	heavy metal transport/detoxification protein
TraesCS3A02G526400	cDEG	13	25	22	3	88	AT5G02600	NAKR1	Heavy metal transport/detoxification superfamily protein	LOC_Os01g74490	heavy metal-associated domain containing protein
TraesCS4D02G102000	cDEG	12	25	14	11	56	AT1G22990	HIPP22	Heavy metal transport/detoxification superfamily protein	LOC_Os08g31140	heavy metal-associated domain containing protein
TraesCS5A02G244000	cDEG	12	25	17	8	68	AT1G71050	HIPP20	Heavy metal transport/detoxification superfamily protein	LOC_Os01g32330	heavy metal-associated domain containing protein
TraesCS5D02G452000	cDEG	13	25	3	22	12	AT2G30620		Histone H1.2	LOC_Os03g58470	retrotransposon protein
TraesCS5A02G443800	cDEG	12	25	2	23	8	AT2G18050	HIS1-3	histone H1-3	LOC_Os03g58470	retrotransposon protein
TraesCSU02G142200	cDEG	12	25	7	18	28	AT1G07660		Histone H4	LOC_Os05g39050	Core histone H2A/H2B/H3/H4 domain containing protein
TraesCS1D02G165000	cDEG	12	25	17	8	68	AT5G17540		HXXXD-type acyl-transferase family protein	LOC_Os10g35950	transferase family protein
TraesCS3D02G360900	cDEG	13	25	12	13	48	AT5G01210		HXXXD-type acyl-transferase family protein	LOC_Os01g63480	transferase family protein
TraesCS4A02G286600	cDEG	11	25	5	20	20	AT5G62720		Integral membrane HPP family protein	LOC_Os03g48030	integral membrane HPP family protein
TraesCS3A02G360400	cDEG	14	25	8	17	32	AT5G60020	LAC17	Laccase-17	LOC_Os05g38410	laccase precursor protein
TraesCS3A02G452400	cDEG	13	25	19	6	76	AT3G09220	LAC7	Laccase-7	LOC_Os11g42200	laccase precursor protein
TraesCS6B02G141400	cDEG	12	25	13	12	52	AT4G16130	ARA1	L-arabinokinase	LOC_Os02g04840	GHMP kinases ATP-binding protein
TraesCS1A02G167100	mDEG	10	25	14	11	56	AT1G65690		Late embryogenesis abundant (LEA) hydroxyproline-rich glycoprotein family	LOC_Os04g58090	harpin-induced protein 1 domain containing protein
TraesCS1A02G344300	cDEG	12	25	2	23	8	AT1G51800		Leucine-rich repeat protein kinase family protein	LOC_Os05g44930	receptor-like protein kinase
TraesCS7A02G317500	cDEG	14	25	19	6	76	AT2G46750	GULLO2	L-gulonolactone oxidase 2	LOC_Os08g02230	FAD-binding and arabino-lactone oxidase domains containing protein
TraesCS5D02G388800	cDEG	13	25	3	22	12	AT1G55020	LOX1	Linoleate 9S-lipoxygenase 1	LOC_Os03g52860	lipoxygenase
TraesCS5B02G300600	cDEG	13	25	2	23	8	AT5G24180		Lipase class 3-related protein	LOC_Os07g34440	lipase class 3 family protein
TraesCS7A02G246200	cDEG	12	25	20	5	80	AT3G45140	LOX2	Lipoxygenase 2%2C chloroplastic	LOC_Os08g39850	lipoxygenase
TraesCS2B02G289800	cDEG	12	25	15	10	60	AT3G02550	LBD41	LOB domain-containing protein 41	LOC_Os01g32770	DUF260 domain containing protein
TraesCS4D02G298300	cDEG	12	25	6	19	24				LOC_Os01g03320	BBTI2 - Bowman-Birk type bran trypsin inhibitor precursor
TraesCS1B02G276800	cDEG	13	25	23	2	92				LOC_Os01g04050	BBTI12 - Bowman-Birk type bran trypsin inhibitor precursor
TraesCS1B02G276900	mDEG	10	25	21	4	84				LOC_Os01g04050	BBTI12 - Bowman-Birk type bran trypsin inhibitor precursor
TraesCS5B02G488500	mDEG	10	25	21	4	84				LOC_Os01g07300	uncharacterized 50.6 kDa protein in the 5region of gyrA and gyrB
TraesCS3D02G286100	cDEG	11	25	22	3	88				LOC_Os01g32670	expressed protein
TraesCS3B02G257400	mDEG	10	25	12	13	48				LOC_Os01g44120	expressed protein
TraesCS3B02G469600	cDEG	11	25	9	16	36				LOC_Os01g69870	expressed protein
TraesCS6B02G127100	cDEG	13	25	13	12	52				LOC_Os02g04130	DUF1645 domain containing protein
TraesCS4D02G298500	cDEG	15	25	5	20	20				LOC_Os03g08490	AP2 domain containing protein
TraesCS4A02G405900	cDEG	12	25	13	12	52				LOC_Os03g08970	expressed protein
TraesCS4D02G189200	cDEG	11	25	22	3	88				LOC_Os03g18850	pathogenesis-related Bet v I family protein
TraesCS7B02G068300	cDEG	12	25	22	3	88				LOC_Os03g18850	pathogenesis-related Bet v I family protein
TraesCS6B02G102700	cDEG	12	25	20	5	80				LOC_Os03g46510	OsFBX103 - F-box domain containing protein
TraesCS5B02G442000	cDEG	11	25	23	2	92				LOC_Os03g58180	basic proline-rich protein precursor
TraesCS5D02G504200	cDEG	14	25	14	11	56				LOC_Os03g61150	expressed protein
TraesCS7B02G231700	cDEG	15	25	15	10	60				LOC_Os04g01950	legume lectins beta domain containing protein
TraesCS1A02G119500	cDEG	13	25	21	4	84				LOC_Os05g08730	early fruit mRNA
TraesCS4B02G332800	cDEG	12	25	18	7	72				LOC_Os05g46480	late embryogenesis abundant protein
TraesCS1A02G420700	cDEG	12	25	6	19	24				LOC_Os05g50500	secretory protein
TraesCS1D02G428600	mDEG	10	25	4	21	16				LOC_Os05g50500	secretory protein
TraesCS1A02G381400	cDEG	12	25	19	6	76				LOC_Os06g04240	expressed protein
TraesCS1D02G389100	cDEG	15	25	17	8	68				LOC_Os06g04240	expressed protein
TraesCS6D02G346800	cDEG	11	25	17	8	68				LOC_Os06g19010	cadmium tolerance factor
TraesCS7B02G294600	cDEG	12	25	22	3	88				LOC_Os06g42620	expressed protein
TraesCS7D02G438400	cDEG	11	25	17	8	68				LOC_Os06g46970	wound induced protein
TraesCS7D02G204500	mDEG	10	25	12	13	48				LOC_Os10g25230	ZIM domain containing protein
TraesCS1A02G163000	cDEG	14	25	15	10	60				LOC_Os10g34700	expressed protein
TraesCS5A02G369900	cDEG	13	25	23	2	92				LOC_Os11g26780	dehydrin
TraesCS5B02G013700	cDEG	13	25	12	13	48				LOC_Os12g43580	expressed protein
TraesCS4D02G197700	cDEG	12	25	21	4	84	AT2G38905		Low temperature and salt responsive protein family	LOC_Os03g17790	OsRCI2-5 - Putative low temperature and salt responsive protein
TraesCS4D02G197800	cDEG	13	25	23	2	92	AT2G38905		Low temperature and salt responsive protein family	LOC_Os03g17790	OsRCI2-5 - Putative low temperature and salt responsive protein
TraesCS2B02G220900	cDEG	13	25	21	4	84	AT2G37710	LECRK41	L-type lectin-domain containing receptor kinase IV.1	LOC_Os09g09500	lectin-like receptor kinase
TraesCS4A02G384500	cDEG	13	25	21	4	84	AT2G37710	LECRK41	L-type lectin-domain containing receptor kinase IV.1	LOC_Os07g03780	lectin-like receptor kinase
TraesCS2D02G039400	cDEG	12	25	22	3	88	AT3G53810	LECRK42	L-type lectin-domain containing receptor kinase IV.2	LOC_Os04g44900	lectin-like receptor kinase
TraesCS7D02G203900	cDEG	14	25	14	11	56	AT1G14780		MACPF domain-containing protein At1g14780	LOC_Os06g14050	membrane attack complex component/perforin/complement C9
TraesCS2D02G283000	cDEG	12	25	11	14	44	AT3G01930		Major facilitator superfamily protein	LOC_Os04g31924	nodulin
TraesCS3A02G472400	cDEG	12	25	23	2	92	AT1G64650		Major facilitator superfamily protein	LOC_Os03g02380	major facilitator superfamily domain-containing protein 5
TraesCS2B02G296100	cDEG	12	25	23	2	92	AT5G52450		MATE efflux family protein	LOC_Os04g30490	MATE efflux family protein
TraesCS4B02G381800	cDEG	13	25	7	18	28	AT1G02170	AMC1	Metacaspase-1	LOC_Os03g27120	ICE-like protease p20 domain containing protein
TraesCS4B02G383100	cDEG	13	25	2	23	8	AT1G02170	AMC1	Metacaspase-1	LOC_Os03g27120	ICE-like protease p20 domain containing protein
TraesCS4A02G218400	cDEG	13	25	23	2	92	AT4G22756	SMO1-2	Methylsterol monooxygenase 1-2	LOC_Os03g01820	fatty acid hydroxylase
TraesCS7D02G353800	cDEG	13	25	21	4	84	AT3G24500	MBF1C	Multiprotein-bridging factor 1c	LOC_Os06g39240	endothelial differentiation-related factor 1
TraesCS3D02G191400	cDEG	13	25	21	4	84	AT1G69560	MYB105	myb domain protein 105	LOC_Os01g16810	MYB family transcription factor
TraesCS6A02G224100	cDEG	11	25	11	14	44	AT3G23250	MYB15	myb domain protein 15	LOC_Os02g41510	MYB family transcription factor
TraesCS6B02G257200	cDEG	11	25	12	13	48	AT3G23250	MYB15	myb domain protein 15	LOC_Os02g41510	MYB family transcription factor
TraesCS6D02G211400	cDEG	11	25	11	14	44	AT3G23250	MYB15	myb domain protein 15	LOC_Os02g41510	MYB family transcription factor
TraesCS2B02G466500	cDEG	11	25	19	6	76	AT1G79180	ATMYB63	myb domain protein 63	LOC_Os04g50770	MYB family transcription factor
TraesCS3B02G371200	cDEG	13	25	15	10	60	AT1G77450	anac032	NAC domain containing protein 32	LOC_Os01g60020	NAC domain transcription factor
TraesCS6A02G057400	cDEG	13	25	8	17	32	AT1G77450	anac032	NAC domain containing protein 32	LOC_Os07g12340	NAC domain-containing protein 67
TraesCS5B02G480900	cDEG	12	25	12	13	48	AT1G01720	NAC002	NAC domain-containing protein 2	LOC_Os03g60080	NAC domain-containing protein 67
TraesCS2A02G000600	cDEG	11	25	24	1	96	AT1G59960		NAD(P)-linked oxidoreductase superfamily protein	LOC_Os04g08550	oxidoreductase
TraesCS2D02G000200	cDEG	12	25	23	2	92	AT1G59960		NAD(P)-linked oxidoreductase superfamily protein	LOC_Os04g08550	oxidoreductase
TraesCS3B02G400800	mDEG	10	25	7	18	28	AT3G55840	HSPRO1	Nematode resistance protein-like HSPRO1	LOC_Os01g63690	hs1
TraesCS6A02G017500	cDEG	13	25	8	17	32	AT1G77760	NIA1	Nitrate reductase	LOC_Os08g36480	nitrate reductase
TraesCS6B02G024900	cDEG	11	25	7	18	28	AT1G77760	NIA1	Nitrate reductase	LOC_Os08g36480	nitrate reductase
TraesCS4A02G194400	cDEG	12	25	24	1	96	AT5G59320	LTP3	Non-specific lipid-transfer protein 3	LOC_Os02g24720	LTPL21 - Protease inhibitor/seed storage/LTP family protein precursor
TraesCS4D02G266900	cDEG	13	25	23	2	92	AT5G64080		Non-specific lipid-transfer protein-like protein At5g64080	LOC_Os03g09230	LTPL69 - Protease inhibitor/seed storage/LTP family protein precursor
TraesCS4D02G238600	cDEG	13	25	17	8	68	AT2G16060	AHB1	Non-symbiotic hemoglobin 1	LOC_Os03g12510	non-symbiotic hemoglobin 2
TraesCS6A02G217000	cDEG	14	25	7	18	28	AT3G26510		Octicosapeptide/Phox/Bem1p family protein	LOC_Os11g25780	PB1 domain containing protein
TraesCS2B02G241200	cDEG	14	25	14	11	56	AT5G55180		O-Glycosyl hydrolases family 17 protein	LOC_Os07g35350	glucan endo-1
TraesCS5A02G018200	cDEG	11	25	24	1	96	AT4G11650	OSM34	Osmotin-like protein OSM34	LOC_Os12g43430	thaumatin
TraesCS2D02G492800	cDEG	14	25	13	12	52	AT5G56550	OXS3	oxidative stress 3	LOC_Os02g13370	expressed protein
TraesCS2B02G270300	cDEG	14	25	3	22	12	AT3G50820	PSBO2	Oxygen-evolving enhancer protein 1-2%2C chloroplastic	LOC_Os01g31690	oxygen-evolving enhancer protein 1
TraesCS4A02G017400	cDEG	11	25	24	1	96	AT2G26560	PLP2	Patatin-like protein 2	LOC_Os08g37180	patatin
TraesCS3D02G396300	cDEG	11	25	23	2	92	AT3G59850		Pectin lyase-like superfamily protein	LOC_Os01g66710	polygalacturonase
TraesCS4D02G061600	cDEG	15	25	15	10	60	AT3G14920		Peptide-N4-(N-acetyl-beta-glucosaminyl)asparagine amidase A protein	LOC_Os01g10960	peptide-N4-asparagine amidase A
TraesCS2D02G276000	cDEG	13	25	17	8	68	AT5G48570	FKBP65	Peptidyl-prolyl cis-trans isomerase FKBP65	LOC_Os04g28420	peptidyl-prolyl isomerase
TraesCS2B02G098100	cDEG	12	25	22	3	88	AT2G37130	PER21	Peroxidase 21	LOC_Os07g49360	peroxidase precursor
TraesCS6B02G403900	cDEG	12	25	2	23	8	AT3G01190	PER27	Peroxidase 27	LOC_Os07g44460	peroxidase precursor
TraesCS1D02G317700	cDEG	12	25	3	22	12	AT3G21770	PER30	Peroxidase 30	LOC_Os05g41990	peroxidase precursor
TraesCS2A02G107600	cDEG	12	25	8	17	32	AT5G05340	PER52	Peroxidase 52	LOC_Os07g48030	peroxidase precursor
TraesCS2B02G537700	cDEG	12	25	23	2	92	AT5G05340	PER52	Peroxidase 52	LOC_Os04g55740	peroxidase precursor
TraesCS2D02G108500	cDEG	14	25	16	9	64	AT5G05340	PER52	Peroxidase 52	LOC_Os07g48010	peroxidase precursor
TraesCS2D02G511200	cDEG	12	25	21	4	84	AT5G05340	PER52	Peroxidase 52	LOC_Os04g55740	peroxidase precursor
TraesCS7D02G369400	cDEG	13	25	5	20	20	AT5G05340	PER52	Peroxidase 52	LOC_Os06g35520	peroxidase precursor
TraesCS1B02G115900	cDEG	14	25	7	18	28	AT5G06730	PER54	Peroxidase 54	LOC_Os10g02040	peroxidase precursor
TraesCS1A02G079400	cDEG	13	25	20	5	80	AT5G51890	PER66	Peroxidase 66	LOC_Os05g04500	peroxidase precursor
TraesCS3B02G411600	cDEG	11	25	1	24	4	AT5G58390	PER67	Peroxidase 67	LOC_Os03g25330	peroxidase precursor
TraesCS4D02G055500	cDEG	14	25	20	5	80	AT3G29670	PMAT2	Phenolic glucoside malonyltransferase 2	LOC_Os02g28340	transferase family protein
TraesCS1B02G048500	cDEG	13	25	18	7	72	AT2G37040	PAL1	Phenylalanine ammonia-lyase 1	LOC_Os04g43800	phenylalanine ammonia-lyase
TraesCS2B02G398300	cDEG	13	25	14	11	56	AT2G37040	PAL1	Phenylalanine ammonia-lyase 1	LOC_Os04g43800	phenylalanine ammonia-lyase
TraesCS2B02G398400	cDEG	13	25	13	12	52	AT2G37040	PAL1	Phenylalanine ammonia-lyase 1	LOC_Os04g43800	phenylalanine ammonia-lyase
TraesCS5B02G468300	cDEG	11	25	16	9	64	AT2G37040	PAL1	Phenylalanine ammonia-lyase 1	LOC_Os04g43800	phenylalanine ammonia-lyase
TraesCS5B02G468400	cDEG	11	25	13	12	52	AT2G37040	PAL1	Phenylalanine ammonia-lyase 1	LOC_Os02g41630	phenylalanine ammonia-lyase
TraesCS6A02G159800	cDEG	11	25	3	22	12	AT1G61520	LHCA3	photosystem I light harvesting complex gene 3	LOC_Os02g10390	chlorophyll A-B binding protein
TraesCS1B02G433300	cDEG	12	25	3	22	12	AT2G34420	LHB1B2	photosystem II light harvesting complex gene B1B2	LOC_Os01g52240	chlorophyll A-B binding protein
TraesCS6B02G309700	cDEG	12	25	24	1	96	AT5G46960		Plant invertase/pectin methylesterase inhibitor superfamily protein	LOC_Os02g33390	pectinesterase inhibitor domain containing protein
TraesCS1D02G431700	cDEG	12	25	5	20	20	AT4G28000		P-loop containing nucleoside triphosphate hydrolases superfamily protein	LOC_Os05g50750	AAA family ATPase
TraesCS3D02G183100	cDEG	13	25	3	22	12	AT1G55550		P-loop containing nucleoside triphosphate hydrolases superfamily protein	LOC_Os01g15540	kinesin motor domain containing protein
TraesCS7B02G326400	cDEG	14	25	21	4	84	AT3G28580		P-loop containing nucleoside triphosphate hydrolases superfamily protein	LOC_Os06g48250	ATPase
TraesCS7B02G230600	cDEG	11	25	16	9	64	AT1G48100		Polygalacturonase At1g48100	LOC_Os05g20020	polygalacturonase
TraesCS5A02G455500	mDEG	10	25	1	24	4	AT1G55320	AAE18	Probable acyl-activating enzyme 18%2C peroxisomal	LOC_Os03g59080	AMP-binding enzyme
TraesCS5D02G238700	cDEG	13	25	16	9	64	AT3G29000	CML30	Probable calcium-binding protein CML30	LOC_Os09g24580	EF hand family protein
TraesCS6A02G033400	cDEG	13	25	22	3	88	AT3G48690	CXE12	Probable carboxylesterase 12	LOC_Os09g28720	alpha/beta hydrolase fold
TraesCS1B02G267600	cDEG	11	25	21	4	84	AT5G06570	CXE15	Probable carboxylesterase 15	LOC_Os05g33940	alpha/beta hydrolase fold
TraesCS6B02G047900	cDEG	12	25	16	9	64	AT1G47480	CXE2	Probable carboxylesterase 2	LOC_Os09g28720	alpha/beta hydrolase fold
TraesCS2B02G078700	cDEG	13	25	19	6	76	AT4G39330	CAD9	Probable cinnamyl alcohol dehydrogenase 9	LOC_Os04g15920	dehydrogenase
TraesCS2D02G064900	cDEG	13	25	15	10	60	AT4G39330	CAD9	Probable cinnamyl alcohol dehydrogenase 9	LOC_Os04g15920	dehydrogenase
TraesCS2B02G538700	cDEG	11	25	7	18	28	AT3G16150		Probable isoaspartyl peptidase/L-asparaginase 2	LOC_Os04g55710	transposon protein
TraesCS2B02G538800	cDEG	12	25	6	19	24	AT3G16150		Probable isoaspartyl peptidase/L-asparaginase 2	LOC_Os04g55710	transposon protein
TraesCS2D02G512100	cDEG	13	25	6	19	24	AT3G16150		Probable isoaspartyl peptidase/L-asparaginase 2	LOC_Os04g55710	transposon protein
TraesCS4D02G007400	cDEG	12	25	20	5	80	AT1G35710		Probable leucine-rich repeat receptor-like protein kinase At1g35710	LOC_Os02g34790	receptor-like protein kinase 5 precursor
TraesCS6D02G206000	cDEG	13	25	16	9	64	AT3G47570		Probable LRR receptor-like serine/threonine-protein kinase At3g47570	LOC_Os02g40200	receptor-like protein kinase precursor
TraesCS7A02G367100	cDEG	13	25	20	5	80	AT3G47570		Probable LRR receptor-like serine/threonine-protein kinase At3g47570	LOC_Os02g13780	receptor-like protein kinase 2 precursor
TraesCS6D02G149300	cDEG	13	25	21	4	84	AT1G23240	PXG7	Probable peroxygenase 7	LOC_Os06g14324	caleosin related protein
TraesCS3A02G362200	cDEG	15	25	23	2	92	AT2G29380	HAI3	Probable protein phosphatase 2C 24	LOC_Os01g62760	protein phosphatase 2C
TraesCS4A02G050000	cDEG	15	25	17	8	68	AT4G33920		Probable protein phosphatase 2C 63	LOC_Os03g10950	protein phosphatase 2C
TraesCS5D02G200800	cDEG	12	25	7	18	28	AT1G35910	TPPD	Probable trehalose-phosphate phosphatase D	LOC_Os09g20390	uncharacterized glycosyl hydrolase Rv2006/MT2062
TraesCS6B02G276300	mDEG	10	25	0	25	0	AT4G12430	TPPF	Probable trehalose-phosphate phosphatase F	LOC_Os02g44230	CPuORF22 - conserved peptide uORF-containing transcript
TraesCS3D02G164900	cDEG	13	25	18	7	72	AT2G33770	UBC24	Probable ubiquitin-conjugating enzyme E2 24	LOC_Os01g13280	ubiquitin conjugating enzyme protein
TraesCS1A02G298600	cDEG	12	25	15	10	60	AT2G38470	WRKY33	Probable WRKY transcription factor 33	LOC_Os05g39720	WRKY70
TraesCS3A02G347500	cDEG	12	25	14	11	56	AT2G38470	WRKY33	Probable WRKY transcription factor 33	LOC_Os01g61080	WRKY24
TraesCS7D02G497300	cDEG	11	25	13	12	52	AT1G80840	WRKY40	Probable WRKY transcription factor 40	LOC_Os06g44010	WRKY28
TraesCS2B02G121900	cDEG	13	25	17	8	68	AT2G46400	WRKY46	Probable WRKY transcription factor 46	LOC_Os07g48260	WRKY47
TraesCS1A02G301100	mDEG	10	25	17	8	68	AT3G56400	WRKY70	Probable WRKY transcription factor 70	LOC_Os05g40060	WRKY48
TraesCS2D02G104500	cDEG	13	25	15	10	60	AT3G56400	WRKY70	Probable WRKY transcription factor 70	LOC_Os07g48260	WRKY47
TraesCS4D02G059000	cDEG	12	25	23	2	92	AT1G17870	EGY3	Probable zinc metallopeptidase EGY3%2C chloroplastic	LOC_Os03g51920	peptidase
TraesCS6B02G347100	cDEG	11	25	2	23	8	AT1G35140	EXL1	Protein EXORDIUM-like 1	LOC_Os02g52040	phosphate-induced protein 1 conserved region domain containing protein
TraesCS1D02G344700	cDEG	12	25	18	7	72	AT5G25930		Protein kinase family protein with leucine-rich repeat domain	LOC_Os05g44770	receptor-like protein kinase 5 precursor
TraesCS7A02G310500	cDEG	13	25	3	22	12	AT4G20380	LSD1	Protein LSD1	LOC_Os08g03610	LSD1 zinc finger domain containing protein
TraesCS7D02G120200	cDEG	14	25	3	22	12	AT3G45680	NPF2.3	Protein NRT1/ PTR FAMILY 2.3	LOC_Os05g27304	peptide transporter PTR2
TraesCS1D02G256700	cDEG	12	25	20	5	80	AT1G68570	NPF3.1	Protein NRT1/ PTR FAMILY 3.1	LOC_Os05g33960	peptide transporter PTR2
TraesCS2D02G307400	cDEG	14	25	13	12	52	AT1G59740	NPF4.3	Protein NRT1/ PTR FAMILY 4.3	LOC_Os04g36040	peptide transporter PTR2
TraesCS1D02G214200	cDEG	11	25	3	22	12	AT1G12110	NPF6.3	Protein NRT1/ PTR FAMILY 6.3	LOC_Os10g40600	peptide transporter PTR2
TraesCS1D02G214300	cDEG	14	25	1	24	4	AT1G12110	NPF6.3	Protein NRT1/ PTR FAMILY 6.3	LOC_Os10g40600	peptide transporter PTR2
TraesCS4B02G231500	cDEG	13	25	10	15	40	AT2G02040	NPF8.3	Protein NRT1/ PTR FAMILY 8.3	LOC_Os03g13274	peptide transporter PTR2
TraesCS1A02G042800	cDEG	11	25	25	0	100	AT2G28690		Protein of unknown function (DUF1635)	LOC_Os05g02450	expressed protein
TraesCS1D02G043200	cDEG	12	25	25	0	100	AT2G28690		Protein of unknown function (DUF1635)	LOC_Os05g02450	expressed protein
TraesCS3B02G428800	cDEG	13	25	19	6	76	AT2G31560		Protein of unknown function (DUF1685)	LOC_Os12g12880	expressed protein
TraesCS4D02G282600	cDEG	14	25	22	3	88	AT5G39530		Protein of unknown function (DUF1997)	LOC_Os03g07200	expressed protein
TraesCS3B02G303200	cDEG	13	25	16	9	64	AT4G21700		Protein of unknown function (DUF2921)	LOC_Os01g48620	expressed protein
TraesCS3A02G274100	cDEG	12	25	6	19	24	AT2G20670		Protein of unknown function (DUF506)	LOC_Os01g54340	plant-specific domain TIGR01615 family protein
TraesCS3B02G545900	cDEG	12	25	24	1	96	AT1G27930		Protein of unknown function (DUF579)	LOC_Os11g29780	plant-specific domain TIGR01627 family protein
TraesCS2D02G453200	cDEG	15	25	9	16	36	AT5G47060		Protein of unknown function (DUF581)	LOC_Os04g49680	DUF581 domain containing protein
TraesCS7A02G453100	cDEG	14	25	6	19	24	AT5G11420		Protein of unknown function%2C DUF642	LOC_Os01g42520	expressed protein
TraesCS3B02G277900	cDEG	13	25	24	1	96	AT1G72770	HAB1	Protein phosphatase 2C 16	LOC_Os05g46040	protein phosphatase 2C
TraesCS3B02G394600	cDEG	13	25	23	2	92	AT1G07430	AIP1	Protein phosphatase 2C 3	LOC_Os01g62760	protein phosphatase 2C
TraesCS7B02G478200	cDEG	12	25	11	14	44	AT5G37260	RVE2	Protein REVEILLE 2	LOC_Os06g51260	MYB family transcription factor
TraesCS2B02G478700	cDEG	12	25	22	3	88	AT1G18330	RVE7	Protein REVEILLE 7	LOC_Os04g49450	MYB family transcription factor
TraesCS6D02G207800	cDEG	12	25	22	3	88	AT5G45160		Protein ROOT HAIR DEFECTIVE 3 homolog 2	LOC_Os11g37260	SEY1
TraesCS4D02G295900	cDEG	13	25	17	8	68	AT1G74950	TIFY10B	Protein TIFY 10B	LOC_Os03g08320	ZIM domain containing protein
TraesCS5A02G212800	cDEG	13	25	16	9	64	AT1G74950	TIFY10B	Protein TIFY 10B	LOC_Os09g26780	zinc-finger protein
TraesCS2D02G285300	cDEG	11	25	15	10	60	AT5G13220	TIFY9	Protein TIFY 9	LOC_Os04g32480	zinc-finger protein
TraesCS4D02G125800	cDEG	14	25	21	4	84	AT5G13750	ZIFL1	Protein ZINC INDUCED FACILITATOR-LIKE 1	LOC_Os11g04104	major facilitator superfamily antiporter
TraesCS5D02G136700	cDEG	13	25	15	10	60	AT3G52820	PAP22	Purple acid phosphatase 22	LOC_Os11g05400	Ser/Thr protein phosphatase family protein
TraesCS2A02G313400	cDEG	14	25	23	2	92	AT4G05490	FBL22	Putative F-box/LRR-repeat protein 22	LOC_Os08g09450	OsFBL41 - F-box domain and LRR containing protein
TraesCS2B02G392300	cDEG	11	25	1	24	4	AT5G23370		Putative GEM-like protein 8	LOC_Os04g44510	GEM
TraesCS6A02G234200	cDEG	14	25	1	24	4	AT5G23370		Putative GEM-like protein 8	LOC_Os02g42430	GEM
TraesCS2D02G452900	cDEG	12	25	14	11	56	AT3G51550	FER	Receptor-like protein kinase FERONIA	LOC_Os04g49690	FERONIA receptor-like kinase
TraesCS2B02G182900	cDEG	11	25	21	4	84	AT2G02990	RNS1	Ribonuclease 1	LOC_Os07g43670	ribonuclease T2 family domain containing protein
TraesCS5B02G162600	cDEG	11	25	4	21	16	AT1G67090	RBCS-1A	Ribulose bisphosphate carboxylase small chain 1A%2C chloroplastic	LOC_Os12g19470	ribulose bisphosphate carboxylase small chain
TraesCS3D02G247000	cDEG	12	25	23	2	92	AT5G10830		S-adenosyl-L-methionine-dependent methyltransferases superfamily protein	LOC_Os01g51870	methyltransferase
TraesCS7A02G196900	cDEG	12	25	20	5	80	AT3G11480	BSMT1	Salicylate/benzoate carboxyl methyltransferase	LOC_Os06g13560	SAM dependent carboxyl methyltransferase
TraesCS5D02G296900	mDEG	10	25	4	21	16	AT5G50760		SAUR-like auxin-responsive protein family	LOC_Os09g32984	auxin responsive protein
TraesCS7A02G333100	cDEG	11	25	24	1	96	AT3G22490		Seed maturation protein	LOC_Os06g23350	late embryogenesis abundant protein D-34
TraesCS4B02G228000	cDEG	14	25	14	11	56	AT2G17840	ERD7	Senescence/dehydration-associated protein-related	LOC_Os03g13840	senescence-associated protein
TraesCS3D02G346200	cDEG	14	25	5	20	20	AT3G07990	SCPL27	Serine carboxypeptidase-like 27	LOC_Os01g61690	OsSCP5 - Putative Serine Carboxypeptidase homologue
TraesCS1A02G088300	cDEG	11	25	25	0	100	AT5G48930	HST	Shikimate O-hydroxycinnamoyltransferase	LOC_Os10g23820	transferase family protein
TraesCS2D02G491100	cDEG	11	25	17	8	68	AT5G48930	HST	Shikimate O-hydroxycinnamoyltransferase	LOC_Os04g56910	transferase family protein
TraesCS4B02G302200	mDEG	10	25	21	4	84	AT5G48930	HST	Shikimate O-hydroxycinnamoyltransferase	LOC_Os03g08720	transferase family protein
TraesCS5A02G338600	cDEG	13	25	17	8	68	AT5G48930	HST	Shikimate O-hydroxycinnamoyltransferase	LOC_Os09g37200	transferase family protein
TraesCS4D02G190100	cDEG	12	25	15	10	60	AT3G51680	SDR2A	Short-chain dehydrogenase reductase 2a	LOC_Os03g18740	oxidoreductase
TraesCS7D02G447200	cDEG	12	25	3	22	12	AT2G23630	sks16	SKU5 similar 16	LOC_Os06g46500	monocopper oxidase
TraesCS5A02G004500	cDEG	12	25	20	5	80	AT1G11680	CYP51G1	Sterol 14-demethylase	LOC_Os05g34325	cytochrome P450 51
TraesCS5A02G004600	cDEG	12	25	21	4	84	AT1G11680	CYP51G1	Sterol 14-demethylase	LOC_Os05g34325	cytochrome P450 51
TraesCS3A02G138400	cDEG	12	25	15	10	60	AT4G10540		Subtilase family protein	LOC_Os04g03810	OsSub38 - Putative Subtilisin homologue
TraesCS6D02G033000	cDEG	12	25	20	5	80	AT4G10550		Subtilase family protein	LOC_Os01g58290	OsSub9 - Putative Subtilisin homologue
TraesCS1A02G272000	cDEG	15	25	8	17	32	AT5G67360	SBT1.7	Subtilisin-like protease SBT1.7	LOC_Os05g36010	OsSub47 - Putative Subtilisin homologue
TraesCS3A02G102800	cDEG	12	25	22	3	88	AT5G61520	STP3	Sugar transport protein 3	LOC_Os11g38160	transporter family protein
TraesCS4B02G057200	cDEG	11	25	21	4	84	AT2G36630		Sulfite exporter TauE/SafE family protein	LOC_Os03g51650	membrane protein
TraesCS7A02G447300	cDEG	13	25	24	1	96	AT5G04220	SYT3	Synaptotagmin-3	LOC_Os09g36770	NTMC2Type1.2 protein
TraesCS5B02G219700	cDEG	13	25	14	11	56	AT2G23810	TET8	Tetraspanin-8	LOC_Os09g25760	tetraspanin family protein
TraesCS7D02G373100	cDEG	12	25	14	11	56	AT5G54770	THI1	Thiamine thiazole synthase%2C chloroplastic	LOC_Os07g34570	FAD dependent oxidoreductase domain containing protein
TraesCS3D02G188000	cDEG	11	25	9	16	36	AT5G47560	TDT	Tonoplast dicarboxylate transporter	LOC_Os09g31130	citrate transporter
TraesCS3A02G010000	cDEG	12	25	3	22	12	AT3G23090		TPX2 (targeting protein for Xklp2) protein family	LOC_Os11g38010	targeting protein for Xklp2
TraesCS3B02G284800	cDEG	12	25	13	12	52	AT4G16430	BHLH3	Transcription factor bHLH3	LOC_Os01g50940	helix-loop-helix DNA-binding domain containing protein
TraesCS5A02G503300	cDEG	14	25	7	18	28	AT5G65640	BHLH93	Transcription factor bHLH93	LOC_Os03g04310	BHLH transcription factor
TraesCS1A02G076200	cDEG	14	25	16	9	64	AT3G06490	MYB108	Transcription factor MYB108	LOC_Os05g04210	MYB family transcription factor
TraesCS1A02G365900	cDEG	11	25	17	8	68	AT5G26660	MYB86	Transcription factor MYB86	LOC_Os05g46610	myb-like DNA-binding domain containing protein
TraesCS5B02G054800	cDEG	13	25	10	15	40	AT3G59060	PIF5	Transcription factor PIF5	LOC_Os12g41650	helix-loop-helix DNA-binding domain containing protein
TraesCS4B02G072300	cDEG	12	25	23	2	92	AT4G34380		Transducin/WD40 repeat-like superfamily protein	LOC_Os03g42710	WD-40 repeat family protein
TraesCS4D02G210700	cDEG	14	25	24	1	96	AT5G06060		Tropinone reductase homolog At5g06060	LOC_Os03g16230	oxidoreductase
TraesCS2B02G326800	cDEG	12	25	1	24	4	AT1G59940	ARR3	Two-component response regulator ARR3	LOC_Os04g36070	OsRR1 type-A response regulator
TraesCS4A02G244500	cDEG	13	25	22	3	88	AT1G47510	AT5PTASE11	Type I inositol 1%2C4%2C5-trisphosphate 5-phosphatase 11	LOC_Os03g42810	endonuclease/exonuclease/phosphatase family domain containing protein
TraesCS4D02G069300	cDEG	14	25	22	3	88	AT1G47510	AT5PTASE11	Type I inositol 1%2C4%2C5-trisphosphate 5-phosphatase 11	LOC_Os03g42810	endonuclease/exonuclease/phosphatase family domain containing protein
TraesCS1A02G070500	cDEG	12	25	20	5	80	AT5G36160	TAT	Tyrosine aminotransferase	LOC_Os11g35040	aminotransferase
TraesCS1D02G211200	cDEG	12	25	13	12	52	AT2G45910	PUB33	U-box domain-containing protein 33	LOC_Os10g40490	U-box domain containing protein
TraesCS2A02G542400	cDEG	12	25	18	7	72	AT2G32300	UCC1	uclacyanin 1	LOC_Os08g04340	plastocyanin-like domain containing protein
TraesCS2D02G543300	cDEG	11	25	17	8	68	AT2G32300	UCC1	uclacyanin 1	LOC_Os08g04340	plastocyanin-like domain containing protein
TraesCS7D02G321200	cDEG	13	25	24	1	96	AT1G77610	UDP-GALT1	UDP-galactose transporter 1	LOC_Os04g59550	phosphate/phosphate translocator
TraesCS4B02G353800	cDEG	12	25	23	2	92	AT4G23010	UTR2	UDP-galactose/UDP-glucose transporter 2	LOC_Os03g02670	transporter family protein
TraesCS2A02G410000	cDEG	13	25	19	6	76	AT2G15490	UGT73B4	UDP-glycosyltransferase 73B4	LOC_Os04g46980	cis-zeatin O-glucosyltransferase
TraesCS2B02G040600	cDEG	12	25	18	7	72	AT2G36770	UGT73C4	UDP-glycosyltransferase 73C4	LOC_Os05g42020	UDP-glucoronosyl and UDP-glucosyl transferase domain containing protein
TraesCS6B02G206900	cDEG	11	25	20	5	80	AT3G53150	UGT73D1	UDP-glycosyltransferase 73D1	LOC_Os02g11640	UDP-glucoronosyl and UDP-glucosyl transferase
TraesCS5B02G072300	cDEG	14	25	15	10	60	AT1G05675	UGT74E1	UDP-glycosyltransferase 74E1	LOC_Os04g12960	UDP-glucoronosyl/UDP-glucosyl transferase
TraesCS3D02G279800	cDEG	14	25	18	7	72	AT3G16520	UGT88A1	UDP-glycosyltransferase 88A1	LOC_Os01g53330	anthocyanidin 5
TraesCS5B02G500700	cDEG	11	25	19	6	76	AT3G11340		UDP-Glycosyltransferase superfamily protein	LOC_Os03g60960	cytokinin-N-glucosyltransferase 1
TraesCS4B02G075200	cDEG	14	25	24	1	96	AT5G67390		unknown protein%3B BEST Arabidopsis thaliana protein match is: Plant protein of unknown function (DUF863) (TAIR:AT1G69360.1)%3B Has 1807 Blast hits to 1807 proteins in 277 species: Archae - 0%3B Bacteria - 0%3B Metazoa - 736%3B Fungi - 347%3B Plants - 385%3B Viru /.../0%3B Other Eukaryotes - 339 (source: NCBI BLink).	LOC_Os11g41600	expressed protein
TraesCS5A02G232400	cDEG	12	25	7	18	28	AT1G05575		unknown protein%3B FUNCTIONS IN: molecular_function unknown%3B INVOLVED IN: anaerobic respiration%3B LOCATED IN: endomembrane system%3B EXPRESSED IN: 17 plant structures%3B EXPRESSED DURING: 9 growth stages%3B BEST Arabidopsis thaliana protein match is: unknown /.../in (TAIR:AT2G31945.1)%3B Has 63 Blast hits to 63 proteins in 10 species: Archae - 0%3B Bacteria - 0%3B Metazoa - 0%3B Fungi - 0%3B P…	LOC_Os09g27410	expressed protein
TraesCS5D02G235600	cDEG	12	25	8	17	32	AT1G05575		unknown protein%3B FUNCTIONS IN: molecular_function unknown%3B INVOLVED IN: anaerobic respiration%3B LOCATED IN: endomembrane system%3B EXPRESSED IN: 17 plant structures%3B EXPRESSED DURING: 9 growth stages%3B BEST Arabidopsis thaliana protein match is: unknown /.../in (TAIR:AT2G31945.1)%3B Has 63 Blast hits to 63 proteins in 10 species: Archae - 0%3B Bacteria - 0%3B Metazoa - 0%3B Fungi - 0%3B P…	LOC_Os09g27410	expressed protein
TraesCS1A02G207600	cDEG	11	25	22	3	88	AT5G52420		unknown protein%3B FUNCTIONS IN: molecular_function unknown%3B INVOLVED IN: biological_process unknown%3B LOCATED IN: endoplasmic reticulum%3B EXPRESSED IN: 24 plant structures%3B EXPRESSED DURING: 13 growth stages%3B BEST Arabidopsis thaliana protein match is: /.../wn protein (TAIR:AT5G23920.1)%3B Has 30201 Blast hits to 17322 proteins in 780 species: Archae - 12%3B Bacteria - 1396%3B Metazoa - …	LOC_Os10g40040	expressed protein
TraesCS6A02G295000	cDEG	11	25	23	2	92	AT5G07330		unknown protein%3B FUNCTIONS IN: molecular_function unknown%3B INVOLVED IN: biological_process unknown%3B LOCATED IN: mitochondrion%3B BEST Arabidopsis thaliana protein match is: unknown protein (TAIR:AT1G63060.1)%3B Has 1807 Blast hits to 1807 proteins in 27 /.../ies: Archae - 0%3B Bacteria - 0%3B Metazoa - 736%3B Fungi - 347%3B Plants - 385%3B Viruses - 0%3B Other Eukaryotes - 339 (source: NCBI…	LOC_Os11g32890	expressed protein
TraesCS1B02G446900	cDEG	11	25	22	3	88	AT3G10020		unknown protein%3B FUNCTIONS IN: molecular_function unknown%3B INVOLVED IN: response to oxidative stress%2C anaerobic respiration%3B LOCATED IN: cellular_component unknown%3B EXPRESSED IN: 23 plant structures%3B EXPRESSED DURING: 13 growth stages%3B Has 47 Blast /.../o 47 proteins in 12 species: Archae - 0%3B Bacteria - 0%3B Metazoa - 1%3B Fungi - 0%3B Plants - 46%3B Viruses - 0%3B Other Eukaryot…	LOC_Os11g05170	expressed protein
TraesCS4D02G054100	cDEG	13	25	21	4	84	AT5G66780		unknown protein%3B Has 1807 Blast hits to 1807 proteins in 277 species: Archae - 0%3B Bacteria - 0%3B Metazoa - 736%3B Fungi - 347%3B Plants - 385%3B Viruses - 0%3B Other Eukaryotes - 339 (source: NCBI BLink).	LOC_Os03g51350	expressed protein
TraesCS3D02G427500	cDEG	12	25	9	16	36	AT1G27290		unknown protein%3B Has 44 Blast hits to 44 proteins in 12 species: Archae - 0%3B Bacteria - 0%3B Metazoa - 0%3B Fungi - 0%3B Plants - 44%3B Viruses - 0%3B Other Eukaryotes - 0 (source: NCBI BLink).	LOC_Os01g69870	expressed protein
TraesCS4B02G294900	cDEG	12	25	22	3	88	AT3G19990		unknown protein%3B INVOLVED IN: biological_process unknown%3B LOCATED IN: chloroplast stroma%2C chloroplast%3B EXPRESSED IN: 23 plant structures%3B EXPRESSED DURING: 13 growth stages%3B Has 118 Blast hits to 118 proteins in 41 species: Archae - 0%3B Bacteria - 42 /.../zoa - 0%3B Fungi - 0%3B Plants - 56%3B Viruses - 0%3B Other Eukaryotes - 20 (source: NCBI BLink).	LOC_Os02g58170	transposon protein
TraesCS3A02G209100	cDEG	13	25	11	14	44	AT5G12010		unknown protein%3B INVOLVED IN: response to salt stress%3B LOCATED IN: chloroplast%2C plasma membrane%2C membrane%3B EXPRESSED IN: 23 plant structures%3B EXPRESSED DURING: 13 growth stages%3B BEST Arabidopsis thaliana protein match is: unknown protein (TAIR:AT4G2 /.../)%3B Has 1807 Blast hits to 1807 proteins in 277 species: Archae - 0%3B Bacteria - 0%3B Metazoa - 736%3B Fungi - 347%3B Plants - 3…	LOC_Os01g40070	expressed protein
TraesCS3A02G506000	cDEG	11	25	14	11	56	AT5G45310		unknown protein%3B LOCATED IN: endomembrane system%3B EXPRESSED IN: stem%2C inflorescence meristem%2C root%2C leaf%3B EXPRESSED DURING: LP.04 four leaves visible%3B Has 30201 Blast hits to 17322 proteins in 780 species: Archae - 12%3B Bacteria - 1396%3B Metazoa - 173 /.../ngi - 3422%3B Plants - 5037%3B Viruses - 0%3B Other Eukaryotes - 2996 (source: NCBI BLink).	LOC_Os01g73110	expressed protein
TraesCS5A02G360000	cDEG	15	25	18	7	72	AT4G30650		UPF0057 membrane protein At4g30650	LOC_Os09g38560	OsRCI2-11 - Hydrophobic protein OSR8
TraesCS5D02G256700	cDEG	12	25	18	7	72	AT1G21270	WAK2	Wall-associated receptor kinase 2	LOC_Os09g29510	OsWAK80 - OsWAK receptor-like protein kinase
TraesCS5A02G035300	cDEG	12	25	20	5	80	AT1G21230	WAK5	Wall-associated receptor kinase 5	LOC_Os12g42070	OsWAK129b - OsWAK receptor-like protein kinase
TraesCS6B02G415100	cDEG	15	25	3	22	12	AT1G21230	WAK5	Wall-associated receptor kinase 5	LOC_Os02g56630	OsWAK24 - OsWAK receptor-like protein kinase
TraesCS6D02G308700	cDEG	11	25	2	23	8	AT1G44800		WAT1-related protein At1g44800	LOC_Os02g52930	integral membrane protein DUF6 containing protein
TraesCS2A02G532200	cDEG	12	25	14	11	56	AT4G10265		Wound-responsive family protein	LOC_Os04g54300	wound induced protein
TraesCS3D02G173300	cDEG	12	25	18	7	72	AT1G62300	WRKY6	WRKY transcription factor 6	LOC_Os01g14440	WRKY1
TraesCS2A02G306800	cDEG	14	25	21	4	84	AT5G64530	ANAC104	xylem NAC domain 1	LOC_Os04g35660	no apical meristem protein
TraesCS3D02G364800	cDEG	12	25	22	3	88	AT3G20880	WIP4	Zinc finger protein WIP4	LOC_Os01g63980	ZOS1-17 - C2H2 zinc finger protein
TraesCS7D02G362100	cDEG	11	25	10	15	40	AT1G10970	ZIP4	zinc transporter 4 precursor	LOC_Os06g37010	metal cation transporter
TraesCS4B02G086100	cDEG	12	25	22	3	88	AT3G03080		Zinc-binding dehydrogenase family protein	LOC_Os11g14910	NADP-dependent oxidoreductase
TraesCS2A02G424861	cDEG	11	25	4	21	16
TraesCS2B02G471600	mDEG	10	25	22	3	88
TraesCS2B02G533500	cDEG	13	25	24	1	96
TraesCS3A02G066600	cDEG	13	25	24	1	96
TraesCS3A02G214400	cDEG	11	25	21	4	84
TraesCS4A02G071700	cDEG	13	25	10	15	40
TraesCS4A02G445800	cDEG	12	25	21	4	84
TraesCS4B02G106200	cDEG	14	25	17	8	68
TraesCS4B02G304800	cDEG	14	25	17	8	68
TraesCS4D02G317300	cDEG	12	25	7	18	28
TraesCS7A02G368800	cDEG	13	25	17	8	68
TraesCS7B02G063200	cDEG	12	25	12	13	48
TraesCS7D02G159500	cDEG	12	25	14	11	56
TraesCS7D02G355900	cDEG	12	25	21	4	84
TraesCS1D02G415900	cDEG	14	24	22	2	91.6667	AT3G61220	SDR1	(+)-neomenthol dehydrogenase	LOC_Os02g42810	oxidoreductase
TraesCS4D02G145600	cDEG	12	24	19	5	79.1667	AT5G12020	HSP17.6	17.6 kDa class II heat shock protein	LOC_Os01g08860	hsp20/alpha crystallin family protein
TraesCS1A02G089600	cDEG	13	24	14	10	58.3333	AT1G77330		1-aminocyclopropane-1-carboxylate oxidase 5	LOC_Os05g05680	1-aminocyclopropane-1-carboxylate oxidase
TraesCS1B02G117500	cDEG	11	24	10	14	41.6667	AT1G77330		1-aminocyclopropane-1-carboxylate oxidase 5	LOC_Os05g05680	1-aminocyclopropane-1-carboxylate oxidase
TraesCS2B02G414800	cDEG	13	24	17	7	70.8333	AT4G11280	ACS6	1-aminocyclopropane-1-carboxylate synthase 6	LOC_Os04g48850	aminotransferase
TraesCS1A02G255800	cDEG	12	24	14	10	58.3333	AT4G15560	DXS	1-deoxy-D-xylulose-5-phosphate synthase%2C chloroplastic	LOC_Os05g33840	transketolase
TraesCS1D02G392500	cDEG	12	24	15	9	62.5	AT4G15560	DXS	1-deoxy-D-xylulose-5-phosphate synthase%2C chloroplastic	LOC_Os07g09190	transketolase
TraesCS2B02G626400	cDEG	12	24	19	5	79.1667	AT4G15560	DXS	1-deoxy-D-xylulose-5-phosphate synthase%2C chloroplastic	LOC_Os07g09190	transketolase
TraesCS6B02G346700	cDEG	11	24	11	13	45.8333	AT4G25200	HSP23.6	23.6 kDa heat shock protein%2C mitochondrial	LOC_Os02g52150	heat shock 22 kDa protein
TraesCS6D02G295500	mDEG	10	24	9	15	37.5	AT4G25200	HSP23.6	23.6 kDa heat shock protein%2C mitochondrial	LOC_Os02g52150	heat shock 22 kDa protein
TraesCS2A02G395000	cDEG	13	24	17	7	70.8333	AT5G24530	DMR6	2-oxoglutarate (2OG) and Fe(II)-dependent oxygenase superfamily protein	LOC_Os04g49194	naringenin
TraesCS5D02G126700	cDEG	13	24	14	10	58.3333	AT5G09300	T5E8_100	2-oxoisovalerate dehydrogenase subunit alpha 2%2C mitochondrial	LOC_Os12g08260	dehydrogenase E1 component domain containing protein
TraesCS3D02G514300	cDEG	13	24	21	3	87.5	AT4G24220	VEP1	3-oxo-Delta(4%2C5)-steroid 5-beta-reductase	LOC_Os03g32170	NAD dependent epimerase/dehydratase family protein
TraesCS2D02G231100	cDEG	12	24	12	12	50	AT4G04610	2025-04-01	5'-adenylylsulfate reductase 1%2C chloroplastic	LOC_Os07g32570	OsAPRL1 adenosine 5'-phosphosulfate reductase-like OsAPRL1
TraesCS5A02G003600	mDEG	9	24	22	2	91.6667	AT5G40010	AATP1	AAA-ATPase 1	LOC_Os12g24320	ATPase 3
TraesCS5A02G074200	cDEG	11	24	23	1	95.8333	AT5G40010	AATP1	AAA-ATPase 1	LOC_Os12g24320	ATPase 3
TraesCS1B02G356100	cDEG	12	24	21	3	87.5	AT3G47730	ABCA2	ABC transporter A family member 2	LOC_Os08g30740	ABC transporter
TraesCS2D02G451100	cDEG	12	24	23	1	95.8333	AT3G60160	ABCC9	ABC transporter C family member 9	LOC_Os04g49890	multidrug resistance-associated protein
TraesCS5D02G257000	cDEG	11	24	21	3	87.5	AT1G17840	ABCG11	ABC transporter G family member 11	LOC_Os09g07670	white-brown complex homolog protein 11
TraesCS4A02G331100	cDEG	14	24	16	8	66.6667	AT1G66950	ABCG39	ABC transporter G family member 39	LOC_Os07g33780	pleiotropic drug resistance protein 5
TraesCS7A02G391000	cDEG	14	24	15	9	62.5	AT1G15520	ABCG40	ABC transporter G family member 40	LOC_Os12g32820	pleiotropic drug resistance protein 3
TraesCS6D02G232400	cDEG	13	24	15	9	62.5	AT3G57560	NAGK	Acetylglutamate kinase%2C chloroplastic	LOC_Os02g44000	amino acid kinase
TraesCS7A02G009800	cDEG	12	24	17	7	70.8333	AT1G12240	BFRUCT4	Acid beta-fructofuranosidase 4%2C vacuolar	LOC_Os02g01590	glycosyl hydrolases
TraesCS2D02G057000	cDEG	12	24	18	6	75	AT5G24090	CHIB1	Acidic endochitinase	LOC_Os11g47580	glycosyl hydrolase
TraesCS6B02G103900	cDEG	11	24	20	4	83.3333	AT5G24090	CHIB1	Acidic endochitinase	LOC_Os06g25010	glycosyl hydrolase
TraesCS5A02G478500	cDEG	13	24	7	17	29.1667	AT5G59880	ADF3	Actin-depolymerizing factor 3	LOC_Os03g60580	actin-depolymerizing factor
TraesCS6A02G323800	cDEG	14	24	16	8	66.6667	AT3G03270		Adenine nucleotide alpha hydrolases-like superfamily protein	LOC_Os02g53320	universal stress protein domain containing protein
TraesCS2A02G358100	cDEG	12	24	18	6	75	AT1G80050	APT2	Adenine phosphoribosyltransferase 2	LOC_Os02g40010	phosphoribosyl transferase
TraesCS4D02G074900	cDEG	13	24	17	7	70.8333	AT5G50300	AZG2	Adenine/guanine permease AZG2	LOC_Os11g24060	permease domain containing protein
TraesCS1D02G045600	cDEG	11	24	22	2	91.6667	AT4G37940	AGL21	Agamous-like MADS-box protein AGL21	LOC_Os02g36924	OsMADS27 - MADS-box family gene with MIKCc type-box
TraesCS4A02G202200	cDEG	13	24	14	10	58.3333	AT1G77120	ADH1	Alcohol dehydrogenase class-P	LOC_Os11g10480	dehydrogenase
TraesCS4B02G106500	cDEG	13	24	16	8	66.6667	AT1G77120	ADH1	Alcohol dehydrogenase class-P	LOC_Os11g10480	dehydrogenase
TraesCS5D02G196300	cDEG	12	24	6	18	25	AT1G77120	ADH1	Alcohol dehydrogenase class-P	LOC_Os11g10520	dehydrogenase
TraesCS2B02G189700	cDEG	13	24	12	12	50	AT5G42250		Alcohol dehydrogenase-like 7	LOC_Os07g42924	dehydrogenase
TraesCS5A02G213600	mDEG	10	24	22	2	91.6667	AT1G54100	ALDH7B4	Aldehyde dehydrogenase family 7 member B4	LOC_Os09g26880	aldehyde dehydrogenase
TraesCS5D02G173900	cDEG	13	24	21	3	87.5	AT5G48220		Aldolase-type TIM barrel family protein	LOC_Os09g08130	indole-3-glycerol phosphate synthase
TraesCS2B02G311300	cDEG	11	24	4	20	16.6667	AT3G52720	ACA1	Alpha carbonic anhydrase 1%2C chloroplastic	LOC_Os02g33030	bifunctional monodehydroascorbate reductase and carbonic anhydrasenectarin-3 precursor
TraesCS6A02G001200	cDEG	12	24	17	7	70.8333	AT5G56330	ATACA8	alpha carbonic anhydrase 8	LOC_Os03g58470	retrotransposon protein
TraesCS1D02G231500	cDEG	11	24	16	8	66.6667	AT3G62860		alpha/beta-Hydrolases superfamily protein	LOC_Os05g29974	lipase
TraesCS3A02G173000	cDEG	11	24	22	2	91.6667	AT1G02660		alpha/beta-Hydrolases superfamily protein	LOC_Os01g15000	lipase
TraesCS3A02G476700	cDEG	11	24	14	10	58.3333	AT4G36610		alpha/beta-Hydrolases superfamily protein	LOC_Os01g44960	hydrolase
TraesCS4D02G051900	cDEG	13	24	24	0	100	AT1G73480		alpha/beta-Hydrolases superfamily protein	LOC_Os03g51010	hydrolase
TraesCS2A02G586500	cDEG	11	24	12	12	50	AT4G27450		Aluminium induced protein with YGL and LRDR motifs	LOC_Os04g58280	stem-specific protein TSJT1
TraesCS3D02G402200	mDEG	10	24	8	16	33.3333	AT5G63850	AAP4	Amino acid permease 4	LOC_Os12g08090	amino acid transporter
TraesCS5D02G140600	cDEG	13	24	10	14	41.6667	AT4G11000		Ankyrin repeat family protein	LOC_Os11g04830	embryogenesis transmembrane protein
TraesCS5D02G343400	cDEG	14	24	21	3	87.5	AT1G03670		ankyrin repeat family protein	LOC_Os11g08050	expressed protein
TraesCS6A02G363200	cDEG	11	24	14	10	58.3333	AT4G03450		Ankyrin repeat family protein	LOC_Os06g19010	cadmium tolerance factor
TraesCS7D02G217400	cDEG	13	24	21	3	87.5	AT4G18910	NIP1-2	Aquaporin NIP1-2	LOC_Os02g13870	aquaporin protein
TraesCS5A02G100000	cDEG	13	24	8	16	33.3333	AT2G37170	PIP2-2	Aquaporin PIP2-2	LOC_Os07g26630	aquaporin protein
TraesCS4D02G308800	mDEG	10	24	0	24	0	AT3G26520	TIP1-2	Aquaporin TIP1-2	LOC_Os03g05290	aquaporin protein
TraesCS5A02G004900	cDEG	11	24	20	4	83.3333	AT4G15340	PEN1	Arabidiol synthase	LOC_Os11g35710	cycloartenol synthase
TraesCS7A02G328500	cDEG	13	24	22	2	91.6667	AT3G48980		Arabidopsis thaliana protein of unknown function (DUF821)	LOC_Os08g01150	DTA2
TraesCS7B02G229100	cDEG	14	24	22	2	91.6667	AT3G48980		Arabidopsis thaliana protein of unknown function (DUF821)	LOC_Os08g01150	DTA2
TraesCS2B02G308400	cDEG	14	24	18	6	75	AT1G08250	ADT6	Arogenate dehydratase/prephenate dehydratase 6%2C chloroplastic	LOC_Os04g33390	prephenate dehydratase domain containing protein
TraesCS2D02G597900	cDEG	13	24	4	20	16.6667	AT4G12080	AHL1	AT-hook motif nuclear-localized protein 1	LOC_Os04g58730	AT hook motif domain containing protein
TraesCS5B02G042800	cDEG	12	24	18	6	75	AT1G09620		ATP binding%3Bleucine-tRNA ligases%3Baminoacyl-tRNA ligases%3Bnucleotide binding%3BATP binding%3Baminoacyl-tRNA ligases	LOC_Os09g32650	leucyl-tRNA synthetase
TraesCS2A02G174600	cDEG	12	24	18	6	75	AT3G29970		B12D protein	LOC_Os07g41340	B12D protein
TraesCS2D02G182000	cDEG	13	24	15	9	62.5	AT3G29970		B12D protein	LOC_Os07g41340	B12D protein
TraesCS2D02G270300	mDEG	10	24	13	11	54.1667	AT5G57150	BHLH35	basic helix-loop-helix (bHLH) DNA-binding superfamily protein	LOC_Os04g23550	basic helix-loop-helix family protein
TraesCS3B02G002200	cDEG	12	24	12	12	50	AT1G10585		basic helix-loop-helix (bHLH) DNA-binding superfamily protein	LOC_Os01g01870	helix-loop-helix DNA-binding domain containing protein
TraesCS3D02G293500	cDEG	12	24	4	20	16.6667	AT3G58120	BZIP61	Basic leucine zipper 61	LOC_Os01g55150	bZIP transcription factor domain containing protein
TraesCS5B02G142200	cDEG	13	24	3	21	12.5	AT3G58120	BZIP61	Basic leucine zipper 61	LOC_Os02g14910	bZIP transcription factor family protein
TraesCS4D02G185500	mDEG	10	24	23	1	95.8333	AT2G18160	ATBZIP2	basic leucine-zipper 2	LOC_Os03g19370	CPuORF4 - conserved peptide uORF-containing transcript
TraesCS5B02G332300	mDEG	10	24	22	2	91.6667	AT2G17770	BZIP27	basic region/leucine zipper motif 27	LOC_Os09g36910	bZIP transcription factor domain containing protein
TraesCS2D02G489200	cDEG	11	24	10	14	41.6667	AT1G55120	CWINV3	Beta-fructofuranosidase%2C insoluble isoenzyme CWINV3	LOC_Os09g08072	glycosyl hydrolases
TraesCS7B02G145100	cDEG	12	24	1	23	4.16667	AT2G44480	BGLU17	Beta-glucosidase 17	LOC_Os08g39860	Os8bglu27 - beta-glucosidase homologue
TraesCS6B02G176800	mDEG	9	24	9	15	37.5	AT3G14770	SWEET2	Bidirectional sugar transporter SWEET2	LOC_Os01g36070	nodulin MtN3 family protein
TraesCS1A02G374300	cDEG	13	24	22	2	91.6667	AT3G18280		Bifunctional inhibitor/lipid-transfer protein/seed storage 2S albumin superfamily protein	LOC_Os05g47700	LTPL152 - Protease inhibitor/seed storage/LTP family protein precursor
TraesCS4D02G359900	cDEG	13	24	12	12	50	AT1G62510		Bifunctional inhibitor/lipid-transfer protein/seed storage 2S albumin superfamily protein	LOC_Os03g01320	LTPL116 - Protease inhibitor/seed storage/LTP family protein precursor
TraesCS5A02G433100	cDEG	13	24	14	10	58.3333	AT3G22600		Bifunctional inhibitor/lipid-transfer protein/seed storage 2S albumin superfamily protein	LOC_Os03g57970	LTPL73 - Protease inhibitor/seed storage/LTP family protein precursor
TraesCS6B02G371700	mDEG	10	24	17	7	70.8333	AT2G48140	EDA4	Bifunctional inhibitor/lipid-transfer protein/seed storage 2S albumin superfamily protein	LOC_Os07g07920	LTPL100 - Protease inhibitor/seed storage/LTP family protein precursor
TraesCS4D02G011200	cDEG	14	24	4	20	16.6667	AT3G03680		C2 calcium/lipid-binding plant phosphoribosyltransferase family protein	LOC_Os05g30750	anthranilate phosphoribosyltransferase
TraesCS5A02G262100	cDEG	13	24	14	10	58.3333	AT2G44310		Calcium-binding EF-hand family protein	LOC_Os09g31000	EF hand family protein
TraesCS3A02G492500	cDEG	12	24	10	14	41.6667	AT1G76640	CML39	Calcium-binding protein CML39	LOC_Os01g72530	OsCML31 - Calmodulin-related calcium sensor protein
TraesCS1D02G312500	cDEG	11	24	14	10	58.3333	AT4G29900	ACA10	Calcium-transporting ATPase 10%2C plasma membrane-type	LOC_Os05g41580	calcium-transporting ATPase
TraesCS5A02G024300	cDEG	14	24	22	2	91.6667	AT5G17860	CCX1	Cation/calcium exchanger 1	LOC_Os12g42910	sodium/calcium exchanger protein
TraesCS5A02G148000	cDEG	11	24	3	21	12.5	AT5G07070	CIPK2	CBL-interacting serine/threonine-protein kinase 2	LOC_Os11g02240	CAMK_KIN1/SNF1/Nim1_like.4 - CAMK includes calcium/calmodulin depedent protein kinases
TraesCS5D02G068700	cDEG	13	24	18	6	75	AT4G14580	CIPK4	CBL-interacting serine/threonine-protein kinase 4	LOC_Os03g43440	CAMK_KIN1/SNF1/Nim1_like.17 - CAMK includes calcium/calmodulin depedent protein kinases
TraesCS2A02G210300	cDEG	12	24	16	8	66.6667	AT5G16910	CSLD2	Cellulose synthase-like protein D2	LOC_Os07g36690	CSLF2 - cellulose synthase-like family F; beta1
TraesCS7B02G188400	cDEG	11	24	6	18	25	AT3G03050	CSLD3	Cellulose synthase-like protein D3	LOC_Os08g06380	CSLF6 - cellulose synthase-like family F; beta1
TraesCS7D02G160400	cDEG	13	24	14	10	58.3333	AT3G14200		Chaperone DnaJ-domain superfamily protein	LOC_Os02g54130	heat shock protein DnaJ
TraesCS5B02G069500	mDEG	10	24	12	12	50	AT1G15950	CCR1	Cinnamoyl-CoA reductase 1	LOC_Os08g17500	cinnamoyl-CoA reductase
TraesCS5D02G232400	cDEG	12	24	20	4	83.3333	AT1G15950	CCR1	Cinnamoyl-CoA reductase 1	LOC_Os09g25150	cinnamoyl-CoA reductase
TraesCS5A02G205700	cDEG	12	24	19	5	79.1667	AT4G37980	CAD7	Cinnamyl alcohol dehydrogenase 7	LOC_Os09g23560	dehydrogenase
TraesCS7A02G200500	mDEG	10	24	23	1	95.8333	AT3G62120		Class II aaRS and biotin synthetases superfamily protein	LOC_Os12g25710	bifunctional aminoacyl-tRNA synthetase
TraesCS2B02G410800	cDEG	11	24	16	8	66.6667	AT5G07475		Cupredoxin superfamily protein	LOC_Os04g46120	plastocyanin-like domain containing protein
TraesCS4A02G033500	cDEG	12	24	11	13	45.8333	AT3G27200		Cupredoxin superfamily protein	LOC_Os09g39940	plastocyanin-like domain containing protein
TraesCS5A02G248600	cDEG	12	24	17	7	70.8333	AT1G72230		Cupredoxin superfamily protein	LOC_Os02g52180	plastocyanin-like domain containing protein
TraesCS2B02G241900	cDEG	13	24	22	2	91.6667	AT4G23180	CRK10	Cysteine-rich receptor-like protein kinase 10	LOC_Os07g35330	TKL_IRAK_DUF26-lc.13 - DUF26 kinases have homology to DUF26 containing loci
TraesCS3A02G039400	mDEG	10	24	23	1	95.8333	AT4G23180	CRK10	Cysteine-rich receptor-like protein kinase 10	LOC_Os10g04730	TKL_IRAK_DUF26-la.6 - DUF26 kinases have homology to DUF26 containing loci
TraesCS4D02G089200	cDEG	11	24	10	14	41.6667	AT4G04570	CRK40	Cysteine-rich receptor-like protein kinase 40	LOC_Os11g11890	protein kinase domain containing protein
TraesCS3B02G038900	cDEG	13	24	22	2	91.6667	AT4G00970	CRK41	Cysteine-rich receptor-like protein kinase 41	LOC_Os02g48080	cysteine-rich receptor-like protein kinase 7 precursor
TraesCS1A02G145100	cDEG	12	24	19	5	79.1667	AT2G31170	SYCO ARATH	Cysteinyl-tRNA synthetase%2C class Ia family protein	LOC_Os03g04960	cysteinyl-tRNA synthetase
TraesCS1B02G162400	cDEG	12	24	20	4	83.3333	AT2G31170	SYCO ARATH	Cysteinyl-tRNA synthetase%2C class Ia family protein	LOC_Os03g04960	cysteinyl-tRNA synthetase
TraesCS6A02G240700	cDEG	13	24	22	2	91.6667	AT5G53560	CYTB5-E	Cytochrome b5 isoform E	LOC_Os02g43360	cytochrome b5-like Heme/Steroid binding domain containing protein
TraesCS6D02G222900	mDEG	10	24	21	3	87.5	AT5G53560	CYTB5-E	Cytochrome b5 isoform E	LOC_Os02g43360	cytochrome b5-like Heme/Steroid binding domain containing protein
TraesCS7D02G532100	mDEG	10	24	21	3	87.5	AT5G24960	CYP71A14	Cytochrome P450 71A14	LOC_Os06g43384	cytochrome P450
TraesCS3A02G152700	cDEG	13	24	20	4	83.3333	AT3G48280	CYP71A25	Cytochrome P450 71A25	LOC_Os01g12750	cytochrome P450
TraesCS4A02G384700	cDEG	12	24	18	6	75	AT3G26210	CYP71B23	Cytochrome P450 71B23	LOC_Os12g32850	cytochrome P450
TraesCS3D02G226100	cDEG	14	24	14	10	58.3333	AT3G14660	CYP72A13	Cytochrome P450 72A13	LOC_Os01g43700	cytochrome P450 72A1
TraesCS1B02G130000	cDEG	12	24	14	10	58.3333	AT3G14680	CYP72A14	Cytochrome P450 72A14	LOC_Os01g43740	cytochrome P450 72A1
TraesCS1D02G004500	cDEG	12	24	22	2	91.6667	AT3G14680	CYP72A14	Cytochrome P450 72A14	LOC_Os01g43700	cytochrome P450 72A1
TraesCS3A02G228100	cDEG	12	24	22	2	91.6667	AT3G14690	CYP72A15	Cytochrome P450 72A15	LOC_Os01g43700	cytochrome P450 72A1
TraesCS3B02G609400	cDEG	11	24	21	3	87.5	AT3G14690	CYP72A15	Cytochrome P450 72A15	LOC_Os05g30890	cytochrome P450
TraesCS3B02G609600	cDEG	11	24	22	2	91.6667	AT3G14690	CYP72A15	Cytochrome P450 72A15	LOC_Os01g43700	cytochrome P450 72A1
TraesCS4B02G202000	cDEG	11	24	23	1	95.8333	AT3G14690	CYP72A15	Cytochrome P450 72A15	LOC_Os01g43844	cytochrome P450 72A1
TraesCS4D02G202800	cDEG	11	24	20	4	83.3333	AT3G14690	CYP72A15	Cytochrome P450 72A15	LOC_Os01g43700	cytochrome P450 72A1
TraesCS6B02G416900	cDEG	12	24	17	7	70.8333	AT3G14690	CYP72A15	Cytochrome P450 72A15	LOC_Os01g41810	cytochrome P450 72A1
TraesCS3B02G403400	cDEG	11	24	18	6	75	AT2G27690	CYP94C1	Cytochrome P450 94C1	LOC_Os01g63930	cytochrome P450
TraesCS2A02G152200	cDEG	14	24	15	9	62.5	AT2G46960	CYP709B1	cytochrome P450%2C family 709%2C subfamily B%2C polypeptide 1	LOC_Os07g44130	cytochrome P450 72A1
TraesCS6D02G386300	cDEG	13	24	12	12	50	AT1G64950	CYP89A5	cytochrome P450%2C family 89%2C subfamily A%2C polypeptide 5	LOC_Os08g05620	cytochrome P450
TraesCS7A02G277500	cDEG	12	24	22	2	91.6667	AT1G64950	CYP89A5	cytochrome P450%2C family 89%2C subfamily A%2C polypeptide 5	LOC_Os02g01890	cytochrome P450
TraesCS7D02G347600	cDEG	13	24	3	21	12.5	AT5G06900	CYP93D1	cytochrome P450%2C family 93%2C subfamily D%2C polypeptide 1	LOC_Os06g01250	cytochrome P450
TraesCS5B02G561400	cDEG	11	24	21	3	87.5	AT2G37210	LOG3	Cytokinin riboside 5'-monophosphate phosphoribohydrolase LOG3	LOC_Os03g64070	uncharacterized protein PA4923
TraesCS2D02G015100	cDEG	12	24	2	22	8.33333	AT5G07010	SOT15	Cytosolic sulfotransferase 15	LOC_Os09g38239	sulfotransferase domain containing protein
TraesCS1A02G013600	cDEG	12	24	19	5	79.1667	AT2G02100	PDF2.2	Defensin-like protein 2	LOC_Os02g41904	DEF7 - Defensin and Defensin-like DEFL family
TraesCS7D02G052600	cDEG	11	24	24	0	100	AT4G25480	DREB1A	Dehydration-responsive element-binding protein 1A	LOC_Os06g03670	dehydration-responsive element-binding protein
TraesCS1A02G423800	cDEG	12	24	17	7	70.8333	AT2G46140		Desiccation-related protein At2g46140	LOC_Os05g50710	late embryogenesis abundant protein
TraesCS1D02G236800	cDEG	11	24	18	6	75	AT5G07920	DGK1	Diacylglycerol kinase 1	LOC_Os12g38780	diacylglycerol kinase 1
TraesCSU02G200800	cDEG	12	24	14	10	58.3333	AT1G55210	DIR20	Dirigent protein 20	LOC_Os07g42570	dirigent
TraesCS2B02G401300	cDEG	14	24	13	11	54.1667	AT4G26090	RPS2	Disease resistance protein RPS2	LOC_Os04g43440	NB-ARC/LRR disease resistance protein
TraesCS2D02G380500	cDEG	13	24	12	12	50	AT4G26090	RPS2	Disease resistance protein RPS2	LOC_Os04g43440	NB-ARC/LRR disease resistance protein
TraesCS3D02G322500	cDEG	13	24	5	19	20.8333	AT5G44680		DNA glycosylase superfamily protein	LOC_Os01g58550	methyladenine glycosylase
TraesCS4B02G135800	cDEG	12	24	4	20	16.6667	AT2G29970		Double Clp-N motif-containing P-loop nucleoside triphosphate hydrolases superfamily protein	LOC_Os12g01360	expressed protein
TraesCS2A02G298000	cDEG	15	24	12	12	50	AT3G52450	PUB22	E3 ubiquitin-protein ligase PUB22	LOC_Os04g34030	U-box domain-containing protein
TraesCS6D02G403400	mDEG	10	24	15	9	62.5	AT4G27520	ENODL2	Early nodulin-like protein 2	LOC_Os10g36180	expressed protein
TraesCS4B02G399500	cDEG	12	24	3	21	12.5	AT1G64640	ENODL8	early nodulin-like protein 8	LOC_Os03g02400	plastocyanin-like domain containing protein
TraesCSU02G114600	cDEG	13	24	3	21	12.5	AT1G64640	ENODL8	early nodulin-like protein 8	LOC_Os03g02400	plastocyanin-like domain containing protein
TraesCS7D02G087800	cDEG	12	24	18	6	75	AT5G25940		early nodulin-related	LOC_Os06g05000	early nodulin 93 ENOD93 protein
TraesCS7D02G088000	cDEG	12	24	18	6	75	AT5G25940		early nodulin-related	LOC_Os06g04950	early nodulin 93 ENOD93 protein
TraesCS2B02G445200	cDEG	12	24	17	7	70.8333	AT1G79460	GA2	Ent-kaur-16-ene synthase%2C chloroplastic	LOC_Os02g36264	terpene synthase
TraesCS2B02G448100	cDEG	12	24	11	13	45.8333	AT3G20310	ERF7	Ethylene-responsive transcription factor 7	LOC_Os04g52090	AP2 domain containing protein
TraesCS2D02G425700	cDEG	12	24	14	10	58.3333	AT3G20310	ERF7	Ethylene-responsive transcription factor 7	LOC_Os04g52090	AP2 domain containing protein
TraesCS3D02G372900	cDEG	13	24	20	4	83.3333	AT5G64750	ABR1	Ethylene-responsive transcription factor ABR1	LOC_Os01g64790	AP2 domain containing protein
TraesCS6D02G237800	mDEG	9	24	6	18	25	AT5G52020	ERF025	Ethylene-responsive transcription factor ERF025	LOC_Os02g45420	AP2 domain containing protein
TraesCS1D02G376600	mDEG	10	24	11	13	45.8333	AT4G34410	ERF109	Ethylene-responsive transcription factor ERF109	LOC_Os08g36920	AP2 domain containing protein
TraesCS1A02G272300	cDEG	13	24	21	3	87.5	AT5G50080	ERF110	Ethylene-responsive transcription factor ERF110	LOC_Os05g36100	AP2 domain containing protein
TraesCS7D02G265000	mDEG	10	24	15	9	62.5	AT5G50080	ERF110	Ethylene-responsive transcription factor ERF110	LOC_Os08g42550	AP2 domain containing protein
TraesCS1B02G243200	cDEG	11	24	19	5	79.1667	AT3G16770	RAP2-3	Ethylene-responsive transcription factor RAP2-3	LOC_Os05g29810	AP2 domain containing protein
TraesCS3D02G467600	cDEG	15	24	11	13	45.8333	AT1G03230		Eukaryotic aspartyl protease family protein	LOC_Os01g71090	xylanase inhibitor
TraesCS4A02G219500	cDEG	12	24	13	11	54.1667	AT4G33490		Eukaryotic aspartyl protease family protein	LOC_Os11g08100	eukaryotic aspartyl protease domain containing protein
TraesCS4B02G334700	cDEG	12	24	5	19	20.8333	AT2G03200		Eukaryotic aspartyl protease family protein	LOC_Os03g20290	aspartic proteinase nepenthesin-1 precursor
TraesCS6B02G312200	cDEG	12	24	9	15	37.5	AT5G10770		Eukaryotic aspartyl protease family protein	LOC_Os02g48870	aspartic proteinase nepenthesin-2 precursor
TraesCS1D02G299700	cDEG	11	24	18	6	75	AT1G69530	EXPA1	Expansin-A1	LOC_Os05g39990	expansin precursor
TraesCS4B02G270800	cDEG	12	24	21	3	87.5	AT4G38540		FAD/NAD(P)-binding oxidoreductase family protein	LOC_Os03g05920	expressed protein
TraesCS3A02G374700	cDEG	13	24	21	3	87.5	AT1G30700		FAD-binding Berberine family protein	LOC_Os08g06170	berberine and berberine like domain containing protein
TraesCS7B02G273500	cDEG	11	24	18	6	75	AT5G44410		FAD-binding Berberine family protein	LOC_Os06g35700	reticuline oxidase-like protein precursor
TraesCS2A02G400100	cDEG	14	24	6	18	25	AT3G61060	PP2A13	F-box protein PP2-A13	LOC_Os04g48270	OsFBX148 - F-box domain containing protein
TraesCS6A02G333900	cDEG	13	24	8	16	33.3333	AT2G15620	NIR1	Ferredoxin--nitrite reductase%2C chloroplastic	LOC_Os01g25484	ferredoxin--nitrite reductase
TraesCS6D02G313100	cDEG	13	24	9	15	37.5	AT2G15620	NIR1	Ferredoxin--nitrite reductase%2C chloroplastic	LOC_Os01g25484	ferredoxin--nitrite reductase
TraesCS5D02G488800	cDEG	12	24	16	8	66.6667	AT5G54160	OMT1	Flavone 3'-O-methyltransferase 1	LOC_Os08g06100	O-methyltransferase
TraesCS5B02G209200	mDEG	10	24	16	8	66.6667	AT5G07990	CYP75B1	Flavonoid 3'-monooxygenase	LOC_Os09g26940	cytochrome P450
TraesCS5D02G217400	cDEG	12	24	16	8	66.6667	AT5G07990	CYP75B1	Flavonoid 3'-monooxygenase	LOC_Os09g26940	cytochrome P450
TraesCS6A02G331400	cDEG	12	24	23	1	95.8333	AT5G08640	FLS1	Flavonol synthase/flavanone 3-hydroxylase	LOC_Os02g52840	flavonol synthase/flavanone 3-hydroxylase
TraesCS3B02G205800	cDEG	11	24	23	1	95.8333	AT5G24860	FPF1	Flowering-promoting factor 1	LOC_Os01g15340	flowering promoting factor-like 1
TraesCS3D02G181800	mDEG	10	24	24	0	100	AT5G24860	FPF1	Flowering-promoting factor 1	LOC_Os01g15340	flowering promoting factor-like 1
TraesCS1D02G274000	cDEG	13	24	13	11	54.1667	AT1G43670		Fructose-1%2C6-bisphosphatase%2C cytosolic	LOC_Os01g64660	fructose-1
TraesCS3B02G402200	cDEG	11	24	21	3	87.5	AT1G08230	GAT1	GABA transporter 1	LOC_Os01g63854	transmembrane amino acid transporter protein
TraesCS2B02G109700	mDEG	10	24	19	5	79.1667	AT1G56600	GOLS2	Galactinol synthase 2	LOC_Os07g48830	glycosyl transferase 8 domain containing protein
TraesCS1D02G223200	cDEG	12	24	3	21	12.5	AT2G45050	GATA2	GATA transcription factor 2	LOC_Os10g40810	GATA zinc finger domain containing protein
TraesCS7B02G270000	cDEG	13	24	22	2	91.6667	AT1G29670		GDSL esterase/lipase At1g29670	LOC_Os06g36520	GDSL-like lipase/acylhydrolase
TraesCS7D02G530700	cDEG	13	24	8	16	33.3333	AT5G55050		GDSL esterase/lipase At5g55050	LOC_Os12g37910	GDSL-like lipase/acylhydrolase
TraesCS5A02G488500	cDEG	12	24	21	3	87.5	AT5G13200		GEM-like protein 5	LOC_Os12g29400	GRAM domain containing protein
TraesCS4B02G377500	cDEG	11	24	20	4	83.3333	AT5G39110	GLP6	Germin-like protein subfamily 1 member 14	LOC_Os08g08990	Cupin domain containing protein
TraesCS4B02G378400	cDEG	12	24	16	8	66.6667	AT5G39110	GLP6	Germin-like protein subfamily 1 member 14	LOC_Os08g09080	Cupin domain containing protein
TraesCS5A02G544500	cDEG	11	24	20	4	83.3333	AT5G39110	GLP6	Germin-like protein subfamily 1 member 14	LOC_Os08g08990	Cupin domain containing protein
TraesCS5A02G545200	mDEG	9	24	17	7	70.8333	AT5G39110	GLP6	Germin-like protein subfamily 1 member 14	LOC_Os08g08990	Cupin domain containing protein
TraesCSU02G128800	cDEG	12	24	16	8	66.6667	AT5G39110	GLP6	Germin-like protein subfamily 1 member 14	LOC_Os08g08990	Cupin domain containing protein
TraesCS4D02G031900	cDEG	12	24	15	9	62.5	AT1G18980		Germin-like protein subfamily T member 2	LOC_Os03g48780	Cupin domain containing protein
TraesCS4D02G032100	cDEG	12	24	14	10	58.3333	AT1G18980		Germin-like protein subfamily T member 2	LOC_Os03g48780	Cupin domain containing protein
TraesCS4A02G053500	cDEG	12	24	22	2	91.6667	AT3G13560		Glucan endo-1%2C3-beta-glucosidase 4	LOC_Os03g25790	glycosyl hydrolases family 17 protein
TraesCS2B02G245900	cDEG	14	24	9	15	37.5	AT1G61800	GPT2	Glucose-6-phosphate/phosphate translocator 2%2C chloroplastic	LOC_Os07g34006	transporter family protein
TraesCS4A02G075600	cDEG	14	24	18	6	75	AT2G02000	GAD3	Glutamate decarboxylase 3	LOC_Os08g36320	decarboxylase
TraesCS3A02G266300	cDEG	13	24	19	5	79.1667	AT5G53460	GLT1	Glutamate synthase 1	LOC_Os01g48960	glutamate synthase
TraesCS2D02G044100	cDEG	13	24	22	2	91.6667	AT3G62760	GSTF13	Glutathione S-transferase F13	LOC_Os01g27360	glutathione S-transferase
TraesCS4D02G201100	cDEG	15	24	22	2	91.6667	AT3G55040	GSTL2	Glutathione S-transferase L2%2C chloroplastic	LOC_Os03g17470	IN2-1 protein
TraesCS3A02G437400	cDEG	11	24	18	6	75	AT1G10370	GSTU17	Glutathione S-transferase U17	LOC_Os10g38710	glutathione S-transferase
TraesCS1A02G186600	cDEG	14	24	19	5	79.1667	AT1G10360	GSTU18	Glutathione S-transferase U18	LOC_Os10g38590	glutathione S-transferase
TraesCS7A02G132000	cDEG	12	24	22	2	91.6667	AT1G10360	GSTU18	Glutathione S-transferase U18	LOC_Os10g38590	glutathione S-transferase
TraesCS7A02G083700	cDEG	14	24	21	3	87.5	AT3G09270	GSTU8	Glutathione S-transferase U8	LOC_Os01g72150	glutathione S-transferase
TraesCS2D02G284700	cDEG	14	24	4	20	16.6667	AT5G41080	GDPD2	Glycerophosphodiester phosphodiesterase GDPD2	LOC_Os02g31030	glycerophosphoryl diester phosphodiesterase family protein
TraesCS4D02G259100	cDEG	11	24	20	4	83.3333	AT4G33840		Glycosyl hydrolase family 10 protein	LOC_Os03g10478	glycosyl hydrolase family 10 protein
TraesCS3B02G528500	mDEG	10	24	16	8	66.6667	AT4G16260		Glycosyl hydrolase superfamily protein	LOC_Os01g71670	glycosyl hydrolases family 17
TraesCS3D02G478200	cDEG	11	24	23	1	95.8333	AT4G16260		Glycosyl hydrolase superfamily protein	LOC_Os01g71670	glycosyl hydrolases family 17
TraesCS7D02G329400	cDEG	13	24	18	6	75	AT1G30080		Glycosyl hydrolase superfamily protein	LOC_Os06g34020	glycosyl hydrolases family 17
TraesCS7D02G405200	cDEG	14	24	6	18	25	AT3G18170		Glycosyltransferase family 61 protein	LOC_Os06g49300	glycosyltransferase protein
TraesCS2D02G131600	mDEG	10	24	22	2	91.6667	AT2G19130		G-type lectin S-receptor-like serine/threonine-protein kinase At2g19130	LOC_Os07g08860	S-domain receptor-like protein kinase
TraesCS7D02G367700	cDEG	12	24	23	1	95.8333	AT3G24520	HSFC1	Heat stress transcription factor C-1	LOC_Os06g35960	HSF-type DNA-binding domain containing protein
TraesCSU02G127300	cDEG	12	24	23	1	95.8333	AT3G24520	HSFC1	Heat stress transcription factor C-1	LOC_Os02g13800	HSF-type DNA-binding domain containing protein
TraesCS1A02G185700	cDEG	13	24	4	20	16.6667	AT1G01490		Heavy metal transport/detoxification superfamily protein	LOC_Os10g38870	heavy metal-associated domain containing protein
TraesCS2B02G077100	cDEG	11	24	20	4	83.3333	AT5G66110	HIPP27	Heavy metal transport/detoxification superfamily protein	LOC_Os04g17100	heavy metal-associated domain containing protein
TraesCS4A02G423600	mDEG	10	24	23	1	95.8333	AT2G18050	HIS1-3	histone H1-3	LOC_Os06g04020	histone H1
TraesCS5A02G444300	cDEG	14	24	4	20	16.6667	AT2G18050	HIS1-3	histone H1-3	LOC_Os03g58470	retrotransposon protein
TraesCS7D02G061400	cDEG	11	24	22	2	91.6667	AT2G18050	HIS1-3	histone H1-3	LOC_Os06g04020	histone H1
TraesCS1A02G229100	cDEG	12	24	5	19	20.8333	AT5G22880	H2B	Histone H2B.10	LOC_Os01g05900	Core histone H2A/H2B/H3/H4 domain containing protein
TraesCS1D02G373900	cDEG	13	24	5	19	20.8333	AT3G46030	HTB11	Histone H2B.7	LOC_Os01g05630	Core histone H2A/H2B/H3/H4 domain containing protein
TraesCS1B02G376700	cDEG	12	24	5	19	20.8333	AT1G09200	HTR2	Histone H3.2	LOC_Os01g64640	histone H3
TraesCS4D02G261600	cDEG	12	24	17	7	70.8333	AT4G36740	ATHB-40	Homeobox-leucine zipper protein ATHB-40	LOC_Os03g10210	homeobox domain containing protein
TraesCS7D02G078900	cDEG	11	24	2	22	8.33333	AT3G60390	HAT3	Homeobox-leucine zipper protein HAT3	LOC_Os06g04850	homeobox associated leucine zipper
TraesCS7D02G079000	cDEG	12	24	4	20	16.6667	AT3G60390	HAT3	Homeobox-leucine zipper protein HAT3	LOC_Os06g04850	homeobox associated leucine zipper
TraesCS6B02G246800	cDEG	13	24	12	12	50	AT3G54420	ATEP3	homolog of carrot EP3-3 chitinase	LOC_Os02g39330	CHIT1 - Chitinase family protein precursor
TraesCS1D02G164900	cDEG	11	24	19	5	79.1667	AT5G17540		HXXXD-type acyl-transferase family protein	LOC_Os10g35950	transferase family protein
TraesCS4B02G315800	cDEG	13	24	1	23	4.16667	AT5G17540		HXXXD-type acyl-transferase family protein	LOC_Os06g49660	transferase family protein
TraesCS7B02G257300	cDEG	11	24	15	9	62.5	AT3G62160		HXXXD-type acyl-transferase family protein	LOC_Os06g39390	transferase family protein
TraesCS2D02G101000	cDEG	11	24	13	11	54.1667	AT2G39050		hydroxyproline-rich glycoprotein family protein	LOC_Os07g48500	stress responsive protein
TraesCS5A02G193500	cDEG	13	24	20	4	83.3333	AT1G69840	HIR2	Hypersensitive-induced response protein 2	LOC_Os09g19710	hypersensitive-induced response protein
TraesCS5D02G184700	cDEG	13	24	11	13	45.8333	AT3G02875	ILR1	IAA-amino acid hydrolase ILR1	LOC_Os07g14590	hydrolase
TraesCS7A02G158400	cDEG	14	24	19	5	79.1667	AT5G16760	ITPK1	Inositol-tetrakisphosphate 1-kinase 1	LOC_Os02g26720	Inositol 1
TraesCS4D02G025500	cDEG	12	24	5	19	20.8333	AT5G62720		Integral membrane HPP family protein	LOC_Os03g48030	integral membrane HPP family protein
TraesCS1B02G085100	cDEG	12	24	17	7	70.8333	AT3G45300	IVD	Isovaleryl-CoA dehydrogenase%2C mitochondrial	LOC_Os05g03480	acyl-coenzyme A dehydrogenase
[truncated: 72,799 more rows]
