# Supplementary material for: Integrated transcriptome profiling identifies novel regulatory hubs mediating salt stress responses during germination and early seedling development in wheat
Source: Research Square preprint supplement (doi:10.21203/rs.3.rs-8546897/v1), 2026-01-22
Supplement: Supplementary file 5 [file 9382f6cb7747c728820f4a86.xlsx]

## Sheet: Sheet3
Name	Sequences
TraesCS4D02G050600	F: AGGCTGCCGACCTCACCTAT
	R: AGCACTCTGTCAGGCTTGAACAA
TraesCS5A02G394900	F: CATCTACGACCCGCAGGTGACG
	R: GCACACGCCGTGGGCGCCCTTGCAG
TraesCS4A02G099100/TraesCS4B02G205200/TraesCS4D02G206100	F: CACCCTAGATTTGAACTCATCCGTCACGA
	R: TCGAAGTCAACAATATTCTAGCTCCAACTCTCT
TraesCS1D02G223200	F: CCTGCTACTGGCGACTGAAAGAAG
	R: CCAGCCCCCAGGAGAGCTACGA
TraesCS5A02G538600/TraesCS4B02G374400/TraesCS4D02G362800	F: TTACCTGCCTGTCCCGACTG
	R: ACGCGGAATTCTCCTGCTTCA
TraesCS4B02G287600	F: CGGTCGATCGGGACGATATATATCTTTGTTG
	R: ACTTATTCCCCTACACGTAGCCCC
TraesCS4A02G016600	F: ATCGACCATCTCCTCCACGC
	R: AGAGGAGGTTGCCGAAGCTG
TraesCS4D02G056900	F: ATCGCCGGCTGACCCATCT
	R: GTCGCCATTCGCAGATACTAAAAATCGCTCG
TraesCS3A02G293700	F: GGTCAAGAGGATACTGGCTAATCGT
	R: TTCTGCAGCGTTGTGACGCA
TraesCs5D02G392000	F: GTCTTCCTCTTACTGCCCCATGTTTA
	R: ATGGTTGAGGCAGTGAACGGTT
TraesCS5A02G352100	F: AGTCCCATCTAGTCGTTGTCC
	R: AGGCACGACACTAGGTACATC
TaActin	F: GACCGTATGAGCAAGGAGAT
	R: CAATCGCTGGACCTGACTC
