# Supplementary material for: Integrated transcriptome profiling identifies novel regulatory hubs mediating salt stress responses during germination and early seedling development in wheat
Source: Research Square preprint supplement (doi:10.21203/rs.3.rs-8546897/v1), 2026-01-22
Supplement: Supplementary file 6 [file b1936c7f5b49533ce742679c.xlsx]

## Sheet: Leaf
	The information of salt-regulated DEGs in leaf tissue.
Gene ID	Log2 (Fold Change)	P-value	FDR	Regulation	Annotation
					The homologous genes and corresponding descriptions in Arabidopsis thaliana			The homologous genes and corresponding descriptions in Oryza sativa
TraesCSU02G177100	16.9583	0.011301	0.0389114	Up	AT2G30770	CYP71A13	cytochrome P450%2C family 71%2C subfamily A%2C polypeptide 13	LOC_Os08g01510	cytochrome P450
TraesCS6A02G350500	16.6788	4.12873e-66	1.70079e-62	Up
TraesCS6D02G332900	16.4024	1.27241e-46	1.24284e-43	Up
TraesCS1A02G265800	16.3049	7.02676e-99	1.10959e-94	Up				LOC_Os01g04050	BBTI12 - Bowman-Birk type bran trypsin inhibitor precursor
TraesCS5D02G360600	16.2484	6.34942e-30	1.9281e-27	Up	AT1G07750		RmlC-like cupins superfamily protein	LOC_Os09g37976	cupin domain containing protein
TraesCS4A02G063600	15.9331	9.01865e-29	2.42063e-26	Up	AT3G22840	ELIP1	Early light-induced protein 1%2C chloroplastic	LOC_Os07g08160	early light-induced protein
TraesCS6B02G383500	15.7753	2.41638e-60	6.18763e-57	Up				LOC_Os11g26790	dehydrin
TraesCS1A02G364000	15.4612	1.25544e-43	9.83042e-41	Up	AT1G52690		Late embryogenesis abundant protein (LEA) family protein	LOC_Os05g46480	late embryogenesis abundant protein
TraesCS3B02G213600	15.3009	1.98437e-31	6.86171e-29	Up	AT5G47560	TDT	Tonoplast dicarboxylate transporter	LOC_Os09g31130	citrate transporter
TraesCSU02G048600	15.2864	2.00649e-22	2.94283e-20	Up	AT2G30770	CYP71A13	cytochrome P450%2C family 71%2C subfamily A%2C polypeptide 13	LOC_Os08g01510	cytochrome P450
TraesCS5B02G398800	14.9444	2.57363e-18	2.34238e-16	Up	AT3G02100	UGT83A1	UDP-glycosyltransferase 83A1	LOC_Os03g55010	UDP-glucoronosyl and UDP-glucosyl transferase domain containing protein
TraesCS3D02G346300	14.8639	5.44193e-10	1.36114e-08	Up	AT1G68660		Ribosomal protein L12/ ATP-dependent Clp protease adaptor protein ClpS family protein	LOC_Os01g61700	ATP-dependent Clp protease adaptor protein ClpS containing protein
TraesCS6B02G383600	14.7618	3.90825e-32	1.44645e-29	Up
TraesCS5B02G566400	14.7615	1.14443e-24	2.08519e-22	Up	AT1G04560		AWPM-19-like family protein	LOC_Os07g24000	AWPM-19-like membrane family protein
TraesCS3A02G488200	14.6663	0.000658873	0.00364848	Up	AT3G09270	GSTU8	Glutathione S-transferase U8	LOC_Os01g72120	glutathione S-transferase
TraesCS2D02G072600	14.6476	7.28084e-17	5.41862e-15	Up	AT1G05675	UGT74E1	UDP-glycosyltransferase 74E1	LOC_Os04g12980	UDP-glucoronosyl/UDP-glucosyl transferase
TraesCS2D02G324400	14.5722	5.22822e-14	2.5468e-12	Up	AT3G28960		Transmembrane amino acid transporter family protein	LOC_Os04g38680	transmembrane amino acid transporter protein
TraesCS7D02G437000	14.538	6.04203e-35	2.7655e-32	Up	AT5G04220	SYT3	Synaptotagmin-3	LOC_Os09g36770	NTMC2Type1.2 protein
TraesCS6B02G059000	14.4885	2.75996e-13	1.21175e-11	Up	AT5G66110	HIPP27	Heavy metal transport/detoxification superfamily protein	LOC_Os04g17100	heavy metal-associated domain containing protein
TraesCS3D02G038000	14.3972	2.54431e-46	2.38676e-43	Up	AT1G16310	MTP10	Metal tolerance protein 10	LOC_Os01g03914	cation efflux family protein
TraesCS6B02G383800	14.396	6.45599e-45	5.56072e-42	Up
TraesCS7A02G107800	14.1107	4.11986e-107	1.30114e-102	Up	AT4G39490	CYP96A10	cytochrome P450%2C family 96%2C subfamily A%2C polypeptide 10	LOC_Os03g04660	cytochrome P450 86A1
TraesCSU02G249900	14.104	3.61794e-30	1.1313e-27	Up	AT2G20340	ELI5	Tyrosine decarboxylase 1	LOC_Os08g04540	decarboxylase
TraesCS6A02G043000	13.9028	2.96307e-11	9.28677e-10	Up	AT5G66110	HIPP27	Heavy metal transport/detoxification superfamily protein	LOC_Os04g17100	heavy metal-associated domain containing protein
TraesCS3D02G350700	13.8998	9.68979e-17	7.06751e-15	Up	AT2G28710		C2H2-type zinc finger family protein	LOC_Os01g62190	ZOS1-15 - C2H2 zinc finger protein
TraesCS3B02G487700	13.8835	2.31605e-06	2.6534e-05	Up	AT4G13420	POT5	Potassium transporter 5	LOC_Os01g70660	potassium transporter
TraesCS6A02G375900	13.8159	8.41751e-36	4.13226e-33	Up	AT1G08650	PPCK1	Phosphoenolpyruvate carboxylase kinase 1	LOC_Os02g56310	calcium-dependent protein kinase isoform AK1
TraesCS7D02G102100	13.7339	2.90876e-27	6.70544e-25	Up	AT4G39490	CYP96A10	cytochrome P450%2C family 96%2C subfamily A%2C polypeptide 10	LOC_Os03g04660	cytochrome P450 86A1
TraesCS7B02G209600	13.6588	3.58238e-21	4.49558e-19	Up	AT5G03555	NCS1	Purine-uracil permease NCS1	LOC_Os02g44680	allantoin permease
TraesCS4A02G316000	13.5283	1.51682e-15	9.27779e-14	Up
TraesCS4D02G027900	13.4777	6.52272e-67	2.94287e-63	Up	AT5G62670	AHA11	ATPase 11%2C plasma membrane-type	LOC_Os12g44150	plasma membrane ATPase
TraesCS1B02G381400	13.4327	7.62264e-14	3.62194e-12	Up	AT1G52690		Late embryogenesis abundant protein (LEA) family protein	LOC_Os05g46480	late embryogenesis abundant protein
TraesCS6B02G091000	13.4309	1.33904e-12	5.29502e-11	Up	AT1G61680	TPS14	S-(+)-linalool synthase%2C chloroplastic	LOC_Os02g02930	terpene synthase
TraesCS1D02G369200	13.4153	3.83221e-28	9.73423e-26	Up	AT3G15670		Late embryogenesis abundant protein (LEA) family protein	LOC_Os05g46480	late embryogenesis abundant protein
TraesCS5B02G478100	13.3827	2.08774e-25	4.07007e-23	Up				LOC_Os01g04040	BBTI11 - Bowman-Birk type bran trypsin inhibitor precursor
TraesCS5B02G093000	13.3771	1.29005e-74	8.73052e-71	Up	AT5G49620	MYB78	myb domain protein 78	LOC_Os12g37690	MYB family transcription factor
TraesCS4D02G173700	13.3112	0.000242837	0.00155522	Up	AT1G14320	RPL10A	60S ribosomal protein L10-1	LOC_Os11g11390	ribosomal protein
TraesCS6B02G090800	13.287	3.90625e-22	5.53215e-20	Up	AT1G61680	TPS14	S-(+)-linalool synthase%2C chloroplastic	LOC_Os02g02930	terpene synthase
TraesCS7B02G326200	13.2736	1.85215e-31	6.42796e-29	Up	AT4G31750	WIN2	Probable protein phosphatase 2C 59	LOC_Os06g48300	protein phosphatase 2C
TraesCS3B02G574600	13.2724	8.25706e-29	2.23521e-26	Up	AT4G24220	VEP1	3-oxo-Delta(4%2C5)-steroid 5-beta-reductase	LOC_Os03g32170	NAD dependent epimerase/dehydratase family protein
TraesCS7A02G554600	13.2437	6.38152e-22	8.86544e-20	Up
TraesCS4A02G431400	13.2067	0.000114176	0.000811652	Up	AT4G38700	DIR15	Dirigent protein 15	LOC_Os12g09700	Jacalin-like lectin domain containing protein
TraesCS1B02G381200	13.1624	5.77286e-27	1.28999e-24	Up	AT3G15670		Late embryogenesis abundant protein (LEA) family protein	LOC_Os05g46480	late embryogenesis abundant protein
TraesCS7D02G100300	13.1484	6.48733e-33	2.55041e-30	Up	AT1G31490		HXXXD-type acyl-transferase family protein	LOC_Os06g05790	transferase family domain containing protein
TraesCS1B02G394700	13.1015	1.97189e-44	1.6246e-41	Up	AT3G18280		Bifunctional inhibitor/lipid-transfer protein/seed storage 2S albumin superfamily protein	LOC_Os05g47730	LTPL153 - Protease inhibitor/seed storage/LTP family protein precursor
TraesCS4D02G047400	13.0824	2.80921e-28	7.19356e-26	Up	AT1G66200	GLN1-2	Glutamine synthetase cytosolic isozyme 1-2	LOC_Os03g50490	glutamine synthetase
TraesCS6A02G284000	13.075	9.55075e-22	1.29456e-19	Up
TraesCS1A02G235000	13.0542	5.10626e-38	2.91445e-35	Up	AT3G26618	ERF1-3	Eukaryotic peptide chain release factor subunit 1-3	LOC_Os01g71270	eukaryotic peptide chain release factor subunit 1-1
TraesCS6B02G091300	13.02	6.54285e-21	7.99883e-19	Up	AT1G61680	TPS14	S-(+)-linalool synthase%2C chloroplastic	LOC_Os02g02930	terpene synthase
TraesCS6B02G087100	12.9252	0.0075455	0.0279446	Up	AT3G48560	ALS	Acetolactate synthase%2C chloroplastic	LOC_Os02g30630	thiamine pyrophosphate enzyme
TraesCS1A02G329600	12.9056	5.05258e-32	1.86269e-29	Up	AT4G21070	BRCA1	Protein BREAST CANCER SUSCEPTIBILITY 1 homolog	LOC_Os05g43610	ATBARD1/BARD1
TraesCS2D02G000300	12.9055	6.02809e-49	6.34597e-46	Up	AT5G51760	AHG1	Probable protein phosphatase 2C 75	LOC_Os05g38290	protein phosphatase 2C
TraesCS2D02G483300	12.8963	1.15343e-45	1.01188e-42	Up	AT3G20660	2025-10-04	Organic cation/carnitine transporter 4	LOC_Os04g53930	organic cation transporter protein
TraesCS6D02G289900	12.8916	5.63087e-34	2.41404e-31	Up				LOC_Os02g50700	expressed protein
TraesCS2D02G295900	12.8898	3.33534e-18	2.97963e-16	Up	AT1G08440	ALMT2	Aluminum-activated malate transporter 2	LOC_Os04g34010	aluminum-activated malate transporter
TraesCS1D02G369800	12.864	1.78261e-16	1.24682e-14	Up	AT3G15670		Late embryogenesis abundant protein (LEA) family protein	LOC_Os05g46480	late embryogenesis abundant protein
TraesCS5B02G118200	12.8064	2.42599e-18	2.21866e-16	Up	AT5G50080	ERF110	Ethylene-responsive transcription factor ERF110	LOC_Os11g06770	ethylene-responsive transcription factor ERF110
TraesCS7D02G463500	12.7882	2.6102e-05	0.000225459	Up	AT4G16730	TPS02	terpene synthase 02	LOC_Os04g27340	terpene synthase
TraesCS3D02G157800	12.7692	4.59745e-25	8.74678e-23	Up	AT1G79900	BAC2	Mitochondrial arginine transporter BAC2	LOC_Os01g12520	mitochondrial carrier protein
TraesCS7B02G285400	12.7532	4.21881e-23	6.62878e-21	Up	AT4G38580	HIPP26	Heavy metal-associated isoprenylated plant protein 26	LOC_Os04g17100	heavy metal-associated domain containing protein
TraesCS7D02G405900	12.7209	1.13522e-08	2.18568e-07	Up	AT1G22370	UGT85A5	UDP-glycosyltransferase 85A5	LOC_Os07g30620	cytokinin-O-glucosyltransferase 2
TraesCS5B02G443400	12.6302	1.56484e-55	2.39133e-52	Up	AT3G19690		CAP (Cysteine-rich secretory proteins%2C Antigen 5%2C and Pathogenesis-related 1 protein) superfamily protein	LOC_Os07g03710	SCP-like extracellular protein
TraesCS3B02G412500	12.6195	3.50055e-17	2.71188e-15	Up	AT5G50080	ERF110	Ethylene-responsive transcription factor ERF110	LOC_Os01g64790	AP2 domain containing protein
TraesCS3A02G149900	12.6046	1.37845e-21	1.83689e-19	Up	AT1G79900	BAC2	Mitochondrial arginine transporter BAC2	LOC_Os01g12520	mitochondrial carrier protein
TraesCS1D02G230600	12.5845	6.56934e-21	8.02086e-19	Up	AT1G53820	ATL60	RING-H2 finger protein ATL60	LOC_Os05g29710	RING-H2 finger protein
TraesCS5B02G182000	12.5704	1.43609e-10	4.00776e-09	Up	AT2G29380	HAI3	Probable protein phosphatase 2C 24	LOC_Os09g15670	protein phosphatase 2C
TraesCS5D02G551600	12.545	2.8036e-21	3.57029e-19	Up				LOC_Os12g26960	THION34 - Plant thionin family protein precursor
TraesCS4B02G022800	12.5391	5.06714e-11	1.52701e-09	Up				LOC_Os12g43750	expressed protein
TraesCS7D02G523500	12.5386	2.61326e-65	1.03165e-61	Up	AT1G08080	ACA7	Alpha carbonic anhydrase 7	LOC_Os08g36630	bifunctional monodehydroascorbate reductase and carbonic anhydrasenectarin-3 precursor
TraesCS7D02G014300	12.5275	2.46561e-21	3.18266e-19	Up	AT4G33467		unknown protein%3B Has 25 Blast hits to 25 proteins in 9 species: Archae - 0%3B Bacteria - 0%3B Metazoa - 0%3B Fungi - 0%3B Plants - 25%3B Viruses - 0%3B Other Eukaryotes - 0 (source: NCBI BLink).	LOC_Os12g08700	expressed protein
TraesCS2D02G364800	12.4699	2.82798e-20	3.15967e-18	Up	AT4G26740	PXG1	Peroxygenase 1	LOC_Os04g43200	caleosin related protein
TraesCS2A02G577800	12.4694	9.9503e-29	2.65564e-26	Up	AT3G56630	CYP94D2	cytochrome P450%2C family 94%2C subfamily D%2C polypeptide 2	LOC_Os03g12260	cytochrome P450 protein
TraesCS3A02G352300	12.4578	0.00455337	0.0185906	Up	AT1G68660		Ribosomal protein L12/ ATP-dependent Clp protease adaptor protein ClpS family protein	LOC_Os01g61700	ATP-dependent Clp protease adaptor protein ClpS containing protein
TraesCS3A02G529400	12.4496	1.05397e-60	2.93703e-57	Up	AT3G16520	UGT88A1	UDP-glycosyltransferase 88A1	LOC_Os01g53350	anthocyanidin 5
TraesCS4D02G035800	12.4457	1.52059e-09	3.48039e-08	Up	AT1G03140		splicing factor Prp18 family protein	LOC_Os03g49430	pre-mRNA-splicing factor
TraesCS6A02G305000	12.4364	1.83991e-17	1.48109e-15	Up	AT5G48100	TT10	Laccase-15	LOC_Os02g51440	laccase precursor protein
TraesCS1A02G411200	12.4332	4.13883e-25	7.8901e-23	Up	AT4G26080	ABI1	Protein phosphatase 2C 56	LOC_Os05g49730	protein phosphatase 2C
TraesCS2A02G049500	12.4273	8.48799e-21	1.02186e-18	Up	AT5G23960	TPS21	Alpha-humulene/(-)-(E)-beta-caryophyllene synthase	LOC_Os08g04500	terpene synthase
TraesCS5D02G199000	12.4076	2.40498e-18	2.20157e-16	Up	AT3G13850	LBD22	LOB domain-containing protein 22	LOC_Os09g19950	DUF260 domain containing protein
TraesCS5B02G399500	12.3769	1.97333e-16	1.37374e-14	Up	AT3G02100	UGT83A1	UDP-glycosyltransferase 83A1	LOC_Os03g55050	UDP-glucoronosyl and UDP-glucosyl transferase domain containing protein
TraesCS4B02G171600	12.3668	2.15835e-11	6.93202e-10	Up	AT1G14320	RPL10A	60S ribosomal protein L10-1	LOC_Os11g11390	ribosomal protein
TraesCS6B02G347700	12.3356	5.23032e-06	5.45462e-05	Up	AT1G22360	UGT85A2	UDP-glycosyltransferase 85A2	LOC_Os04g25800	cytokinin-O-glucosyltransferase 2
TraesCS5A02G149700	12.2647	7.76427e-25	1.4481e-22	Up
TraesCS3D02G305400	12.2599	7.11649e-23	1.09636e-20	Up	AT4G33420	PER47	Peroxidase 47	LOC_Os07g44499	peroxidase
TraesCS3A02G300300	12.2515	9.87639e-08	1.55587e-06	Up	AT4G33467		unknown protein%3B Has 25 Blast hits to 25 proteins in 9 species: Archae - 0%3B Bacteria - 0%3B Metazoa - 0%3B Fungi - 0%3B Plants - 25%3B Viruses - 0%3B Other Eukaryotes - 0 (source: NCBI BLink).	LOC_Os12g08700	expressed protein
TraesCS2A02G186700	12.2489	5.64947e-32	2.07467e-29	Up	AT2G44260		Plant protein of unknown function (DUF946)	LOC_Os07g38840	expressed protein
TraesCS5D02G432500	12.248	1.77745e-14	9.26326e-13	Up	AT4G18390	TCP2	Transcription factor TCP2	LOC_Os03g57190	TCP family transcription factor
TraesCS6B02G309200	12.18	8.79301e-25	1.62398e-22	Up	AT1G32450	NPF7.3	Protein NRT1/ PTR FAMILY 7.3	LOC_Os02g48570	peptide transporter PTR2
TraesCS4D02G282400	12.1507	6.83801e-27	1.52441e-24	Up				LOC_Os03g07180	embryonic protein DC-8
TraesCS5A02G262100	12.1464	5.27276e-15	2.97866e-13	Up	AT2G44310		Calcium-binding EF-hand family protein	LOC_Os09g31000	EF hand family protein
TraesCS4B02G172700	12.145	2.82614e-38	1.64273e-35	Up	AT1G09780	PGM1	2%2C3-bisphosphoglycerate-independent phosphoglycerate mutase 1	LOC_Os03g21260	2
TraesCS3B02G434900	12.1375	1.81268e-36	9.24281e-34	Up	AT2G29150		Tropinone reductase homolog At2g29150	LOC_Os11g43200	tropinone reductase 2
TraesCS1D02G039400	12.1118	3.4698e-12	1.27869e-10	Up	AT2G37040	PAL1	Phenylalanine ammonia-lyase 1	LOC_Os04g43800	phenylalanine ammonia-lyase
TraesCS5D02G403600	12.108	3.73461e-46	3.43533e-43	Up	AT3G02100	UGT83A1	UDP-glycosyltransferase 83A1	LOC_Os03g55010	UDP-glucoronosyl and UDP-glucosyl transferase domain containing protein
TraesCS7A02G447300	12.0886	1.49457e-22	2.23352e-20	Up	AT5G04220	SYT3	Synaptotagmin-3	LOC_Os09g36770	NTMC2Type1.2 protein
TraesCS5D02G042300	12.0885	7.58721e-14	3.60691e-12	Up	AT3G03341		unknown protein%3B Has 30201 Blast hits to 17322 proteins in 780 species: Archae - 12%3B Bacteria - 1396%3B Metazoa - 17338%3B Fungi - 3422%3B Plants - 5037%3B Viruses - 0%3B Other Eukaryotes - 2996 (source: NCBI BLink).	LOC_Os01g45659	expressed protein
TraesCS1A02G202900	12.0745	6.67675e-21	8.13104e-19	Up	AT2G42000		Plant EC metallothionein-like protein%2C family 15	LOC_Os10g39610	expressed protein
TraesCS5A02G262200	12.0717	1.46701e-18	1.37618e-16	Up	AT2G44310		Calcium-binding EF-hand family protein	LOC_Os09g31000	EF hand family protein
TraesCS3B02G042700	12.0384	8.73056e-22	1.1902e-19	Up	AT5G48430		Eukaryotic aspartyl protease family protein	LOC_Os01g71080	xylanase inhibitor
TraesCS6D02G097000	12.0218	1.01211e-20	1.20317e-18	Up	AT3G13040		myb-like HTH transcriptional regulator family protein	LOC_Os06g49040	Myb-like DNA-binding domain containing protein
TraesCS3D02G237400	12.0097	1.04898e-08	2.03453e-07	Up	AT2G21820		unknown protein%3B Has 45 Blast hits to 45 proteins in 13 species: Archae - 0%3B Bacteria - 0%3B Metazoa - 0%3B Fungi - 0%3B Plants - 45%3B Viruses - 0%3B Other Eukaryotes - 0 (source: NCBI BLink).	LOC_Os01g46600	seed maturation protein PM41
TraesCS7A02G443600	12.0017	4.88516e-13	2.06629e-11	Up	AT1G06620		1-aminocyclopropane-1-carboxylate oxidase homolog 1	LOC_Os08g30210	1-aminocyclopropane-1-carboxylate oxidase homolog 1
TraesCS5A02G267300	11.9885	9.82789e-35	4.38505e-32	Up	AT1G20925		Auxin efflux carrier family protein	LOC_Os09g31478	auxin efflux carrier component
TraesCS1A02G005400	11.9877	2.46077e-15	1.46266e-13	Up	AT4G39810	NEN4	Protein NEN4	LOC_Os05g01200	exonuclease
TraesCS5B02G491800	11.9821	1.55763e-15	9.51508e-14	Up	AT5G59880	ADF3	Actin-depolymerizing factor 3	LOC_Os03g60580	actin-depolymerizing factor
TraesCS2B02G132100	11.9743	1.8991e-10	5.17045e-09	Up	AT5G49690	UGT91C1	UDP-glycosyltransferase 91C1	LOC_Os07g47550	glucosyltransferase
TraesCS2D02G281700	11.9672	1.11776e-27	2.66759e-25	Up	AT1G27990		unknown protein%3B BEST Arabidopsis thaliana protein match is: unknown protein (TAIR:AT5G52420.1)%3B Has 86 Blast hits to 86 proteins in 15 species: Archae - 0%3B Bacteria - 0%3B Metazoa - 0%3B Fungi - 0%3B Plants - 84%3B Viruses - 0%3B Other Eukaryotes - 2 (source /.../ BLink).	LOC_Os04g31710	expressed protein
TraesCS1D02G369300	11.9604	3.03366e-34	1.33687e-31	Up	AT3G15670		Late embryogenesis abundant protein (LEA) family protein	LOC_Os05g46480	late embryogenesis abundant protein
TraesCS2B02G343300	11.9603	1.24685e-22	1.88411e-20	Up	AT3G28960		Transmembrane amino acid transporter family protein	LOC_Os04g38680	transmembrane amino acid transporter protein
TraesCS1A02G257400	11.9165	2.29728e-22	3.35893e-20	Up	AT1G68570	NPF3.1	Protein NRT1/ PTR FAMILY 3.1	LOC_Os05g33960	peptide transporter PTR2
TraesCS5B02G443600	11.9124	2.93775e-21	3.72113e-19	Up	AT3G19690		CAP (Cysteine-rich secretory proteins%2C Antigen 5%2C and Pathogenesis-related 1 protein) superfamily protein	LOC_Os07g03710	SCP-like extracellular protein
TraesCS6A02G261100	11.9069	1.83171e-35	8.80949e-33	Up	AT5G17300	RVE1	Protein REVEILLE 1	LOC_Os02g46030	MYB family transcription factor
TraesCS2A02G448500	11.901	3.6507e-34	1.59396e-31	Up	AT1G32640	MYC2	Transcription factor MYC2	LOC_Os09g34330	helix-loop-helix DNA-binding domain containing protein
TraesCS6A02G100000	11.8925	1.14345e-05	0.000109046	Up	AT1G54570		Acyltransferase-like protein At1g54570%2C chloroplastic	LOC_Os01g26039	expressed protein
TraesCS7D02G189400	11.8798	1.89826e-26	4.00563e-24	Up	AT5G15250	FTSH6	ATP-dependent zinc metalloprotease FTSH 6%2C chloroplastic	LOC_Os06g12370	OsFtsH6 FtsH protease
TraesCS3B02G118200	11.8555	1.72767e-26	3.65379e-24	Up	AT1G47890	AtRLP7	receptor like protein 7	LOC_Os01g06900	verticillium wilt disease resistance protein Ve2
TraesCS4B02G053900	11.8519	3.93927e-28	9.9528e-26	Up	AT5G66780		unknown protein%3B Has 1807 Blast hits to 1807 proteins in 277 species: Archae - 0%3B Bacteria - 0%3B Metazoa - 736%3B Fungi - 347%3B Plants - 385%3B Viruses - 0%3B Other Eukaryotes - 339 (source: NCBI BLink).	LOC_Os03g51350	expressed protein
TraesCS2B02G023600	11.8514	2.40123e-24	4.26044e-22	Up	AT5G51760	AHG1	Probable protein phosphatase 2C 75	LOC_Os05g38290	protein phosphatase 2C
TraesCS4A02G061700	11.8477	3.35054e-09	7.15235e-08	Up	AT2G16060	AHB1	Non-symbiotic hemoglobin 1	LOC_Os03g12510	non-symbiotic hemoglobin 2
TraesCS5B02G247700	11.8367	4.76163e-13	2.01764e-11	Up	AT1G17840	ABCG11	ABC transporter G family member 11	LOC_Os09g07670	white-brown complex homolog protein 11
TraesCS6B02G080100	11.8311	8.45034e-09	1.67427e-07	Up	AT3G11340		UDP-Glycosyltransferase superfamily protein	LOC_Os07g13660	UDP-glucoronosyl and UDP-glucosyl transferase domain containing protein
TraesCS1D02G173000	11.8184	3.04429e-16	2.07358e-14	Up				LOC_Os10g34760	RIPER3 - Ripening-related family protein precursor
TraesCS7B02G019300	11.7758	5.55735e-21	6.83814e-19	Up				LOC_Os06g06580	expressed protein
TraesCS6A02G240400	11.7646	4.61602e-16	3.08862e-14	Up	AT2G46680	ATHB-7	Homeobox-leucine zipper protein ATHB-7	LOC_Os02g43330	homeobox associated leucine zipper
TraesCS5B02G464200	11.7557	2.52853e-32	9.46908e-30	Up				LOC_Os12g07440	expressed protein
TraesCS4A02G020100	11.7283	2.31767e-06	2.65462e-05	Up	AT3G60070		Major facilitator superfamily protein	LOC_Os03g07170	lactose permease-related
TraesCS1D02G265900	11.6987	1.43239e-53	1.96685e-50	Up				LOC_Os01g04050	BBTI12 - Bowman-Birk type bran trypsin inhibitor precursor
TraesCS3A02G471700	11.6569	1.79836e-17	1.44888e-15	Up	AT1G03230		Eukaryotic aspartyl protease family protein	LOC_Os01g71090	xylanase inhibitor
TraesCS7D02G536500	11.6496	3.24688e-06	3.57085e-05	Up	AT4G38260		Protein of unknown function (DUF833)	LOC_Os09g15480	Ser/Thr-rich protein T10 in DGCR region
TraesCS7A02G209800	11.6486	5.78911e-40	3.83563e-37	Up	AT4G28390	AAC3	ADP%2CATP carrier protein 3%2C mitochondrial	LOC_Os05g23720	mitochondrial carrier protein
TraesCS5B02G504000	11.6383	2.86384e-12	1.07503e-10	Up	AT5G66460	MAN7	Mannan endo-1%2C4-beta-mannosidase 7	LOC_Os03g61280	OsMan05 - Endo-Beta-Mannanase
TraesCS3B02G544700	11.6053	1.01063e-38	6.06034e-36	Up	AT3G01090	KIN10	SNF1-related protein kinase catalytic subunit alpha KIN10	LOC_Os03g17980	CAMK_KIN1/SNF1/Nim1_like_AMPKh.2 - CAMK includes calcium/calmodulin depedent protein kinases
TraesCS2A02G064400	11.5982	6.32929e-06	6.46759e-05	Up	AT2G32440	KAO2	Ent-kaurenoic acid oxidase 2	LOC_Os10g23180	cytochrome P450
TraesCS2A02G297900	11.5837	1.79985e-07	2.68676e-06	Up	AT3G11680	ALMT8	Aluminum-activated malate transporter 8	LOC_Os04g34010	aluminum-activated malate transporter
TraesCS6A02G091400	11.5829	4.66897e-15	2.66165e-13	Up	AT5G66780		unknown protein%3B Has 1807 Blast hits to 1807 proteins in 277 species: Archae - 0%3B Bacteria - 0%3B Metazoa - 736%3B Fungi - 347%3B Plants - 385%3B Viruses - 0%3B Other Eukaryotes - 339 (source: NCBI BLink).	LOC_Os03g51350	expressed protein
TraesCS5B02G443700	11.5814	3.63412e-18	3.23e-16	Up	AT3G19690		CAP (Cysteine-rich secretory proteins%2C Antigen 5%2C and Pathogenesis-related 1 protein) superfamily protein	LOC_Os07g03710	SCP-like extracellular protein
TraesCS2A02G113500	11.5771	2.65751e-17	2.08953e-15	Up	AT3G29630	UGT79B4	UDP-glycosyltransferase 79B4	LOC_Os07g47550	glucosyltransferase
TraesCS5D02G492300	11.5746	5.79076e-24	9.97549e-22	Up	AT1G01750	ADF10	Actin-depolymerizing factor 10	LOC_Os03g60580	actin-depolymerizing factor
TraesCS5B02G426700	11.5654	1.53223e-11	5.07773e-10	Up				LOC_Os11g26760	dehydrin
TraesCS1B02G423200	11.5618	1.13072e-11	3.82883e-10	Up	AT2G30750	CYP71A12	cytochrome P450%2C family 71%2C subfamily A%2C polypeptide 12	LOC_Os06g43384	cytochrome P450
TraesCS5B02G303800	11.5354	8.23136e-20	8.69441e-18	Up	AT3G03080		Zinc-binding dehydrogenase family protein	LOC_Os12g12590	NADP-dependent oxidoreductase
TraesCSU02G137500	11.5302	3.56026e-17	2.75363e-15	Up	AT5G20630	GER3	Germin-like protein subfamily 3 member 3	LOC_Os04g22080	retrotransposon protein
TraesCS5A02G353400	11.468	1.52684e-05	0.000140708	Up	AT1G07750		RmlC-like cupins superfamily protein	LOC_Os09g37976	cupin domain containing protein
TraesCS7A02G551200	11.4256	0.000199855	0.00131035	Up	AT4G38260		Protein of unknown function (DUF833)	LOC_Os09g15480	Ser/Thr-rich protein T10 in DGCR region
TraesCS2A02G047300	11.4241	7.25847e-07	9.39624e-06	Up	AT2G32830	PHT1-5	Probable inorganic phosphate transporter 1-5	LOC_Os03g04360	inorganic phosphate transporter
TraesCS7B02G412400	11.4156	1.70416e-14	8.92552e-13	Up	AT2G38465		unknown protein%3B FUNCTIONS IN: molecular_function unknown%3B INVOLVED IN: biological_process unknown%3B LOCATED IN: plasma membrane%3B EXPRESSED IN: 21 plant structures%3B EXPRESSED DURING: 11 growth stages%3B Has 16 Blast hits to 16 proteins in 8 species: Ar /.../ 0%3B Bacteria - 0%3B Metazoa - 0%3B Fungi - 0%3B Plants - 16%3B Viruses - 0%3B Other Eukaryotes - 0 (source: NCBI BLink).	LOC_Os06g44190	expressed protein
TraesCS6D02G218300	11.406	8.34445e-20	8.80404e-18	Up	AT4G27460	CBSX5	CBS domain-containing protein CBSX5	LOC_Os02g42640	CBS domain-containing protein
TraesCS5B02G088000	11.3865	2.29944e-19	2.33009e-17	Up	AT2G28790		Pathogenesis-related thaumatin superfamily protein	LOC_Os12g38150	osmotin
TraesCS6A02G283900	11.3837	2.27991e-18	2.09517e-16	Up	AT3G08690	UBC11	Ubiquitin-conjugating enzyme E2 11	LOC_Os02g48910	ubiquitin-conjugating enzyme
TraesCS5A02G183500	11.3661	9.41107e-24	1.57816e-21	Up				LOC_Os09g15540	OsFBX312 - F-box domain containing protein
TraesCS6B02G340500	11.3541	2.94953e-22	4.25352e-20	Up				LOC_Os02g50700	expressed protein
TraesCS3B02G336300	11.3359	5.27897e-08	8.84146e-07	Up	AT4G33467		unknown protein%3B Has 25 Blast hits to 25 proteins in 9 species: Archae - 0%3B Bacteria - 0%3B Metazoa - 0%3B Fungi - 0%3B Plants - 25%3B Viruses - 0%3B Other Eukaryotes - 0 (source: NCBI BLink).	LOC_Os12g08700	expressed protein
TraesCS5D02G100300	11.3248	5.24192e-28	1.31389e-25	Up				LOC_Os05g10420	expressed protein
TraesCS4D02G326100	11.2969	4.14438e-15	2.38701e-13	Up				LOC_Os03g04080	expressed protein
TraesCS3D02G265700	11.2831	3.53802e-11	1.09583e-09	Up	AT3G18215		Protein of unknown function%2C DUF599	LOC_Os02g19060	expressed protein
TraesCS2A02G269600	11.2762	5.03793e-27	1.13379e-24	Up	AT5G10570	BHLH61	Transcription factor bHLH61	LOC_Os03g04310	BHLH transcription factor
TraesCS5B02G491000	11.2661	1.07783e-11	3.67075e-10	Up	AT3G53600		C2H2-type zinc finger family protein	LOC_Os03g60560	ZOS3-21 - C2H2 zinc finger protein
TraesCS7D02G432800	11.2541	2.81147e-20	3.14493e-18	Up	AT1G06620		1-aminocyclopropane-1-carboxylate oxidase homolog 1	LOC_Os08g30100	1-aminocyclopropane-1-carboxylate oxidase homolog 1
TraesCS6A02G310500	11.2528	3.64583e-18	3.23737e-16	Up				LOC_Os02g50700	expressed protein
TraesCS5A02G424700	11.2502	3.97204e-06	4.2649e-05	Up				LOC_Os11g26760	dehydrin
TraesCS1B02G172200	11.2491	4.27147e-13	1.82546e-11	Up				LOC_Os04g30750	expressed protein
TraesCS6A02G350700	11.2393	4.56041e-09	9.52348e-08	Up				LOC_Os11g26750	dehydrin
TraesCS6B02G264200	11.2229	2.79265e-24	4.90894e-22	Up	AT4G27460	CBSX5	CBS domain-containing protein CBSX5	LOC_Os02g42640	CBS domain-containing protein
TraesCS1A02G406300	11.1975	1.12789e-20	1.32914e-18	Up	AT4G22220	ISU1	Iron-sulfur cluster assembly protein 1	LOC_Os01g47340	iron-sulfur cluster assembly enzyme ISCU
TraesCS1A02G412200	11.1927	8.05264e-17	5.95129e-15	Up	AT2G27430		ARM repeat superfamily protein	LOC_Os05g49810	armadillo/beta-catenin-like repeat containing protein
TraesCS3B02G568300	11.1905	7.8358e-16	5.02648e-14	Up	AT3G24520	HSFC1	Heat stress transcription factor C-1	LOC_Os02g13800	HSF-type DNA-binding domain containing protein
TraesCS2B02G132500	11.1775	2.63625e-10	6.9711e-09	Up	AT5G49690	UGT91C1	UDP-glycosyltransferase 91C1	LOC_Os07g47550	glucosyltransferase
TraesCS1D02G237100	11.1574	2.93221e-56	4.63025e-53	Up	AT1G12920	ERF1-2	Eukaryotic peptide chain release factor subunit 1-2	LOC_Os01g71270	eukaryotic peptide chain release factor subunit 1-1
TraesCS1B02G308900	11.1384	2.79587e-31	9.56309e-29	Up	AT3G08860	PYD4	Alanine--glyoxylate aminotransferase 2 homolog 3%2C mitochondrial	LOC_Os05g39770	aminotransferase
TraesCS5D02G521400	11.1245	5.21734e-21	6.4533e-19	Up				LOC_Os09g32310	expressed protein
TraesCS7B02G294300	11.1187	2.39919e-05	0.000209332	Up	AT3G30725	GDU6	Protein GLUTAMINE DUMPER 6	LOC_Os06g42660	expressed protein
TraesCS4D02G098300	11.1148	8.91277e-22	1.21329e-19	Up				LOC_Os11g09180	expressed protein
TraesCS1D02G282300	11.1087	7.61828e-23	1.17176e-20	Up	AT3G11430	GPAT5	Glycerol-3-phosphate acyltransferase 5	LOC_Os05g38350	glycerol-3-phosphate acyltransferase 8
TraesCS7A02G373900	11.0951	2.53317e-18	2.30776e-16	Up	AT4G32410	CESA1	Cellulose synthase A catalytic subunit 1	LOC_Os07g10770	CESA8 - cellulose synthase
TraesCS4D02G240400	11.092	3.49783e-16	2.3638e-14	Up	AT3G22840	ELIP1	Early light-induced protein 1%2C chloroplastic	LOC_Os07g08160	early light-induced protein
TraesCS7B02G116600	11.0542	3.64299e-23	5.74307e-21	Up	AT4G28390	AAC3	ADP%2CATP carrier protein 3%2C mitochondrial	LOC_Os05g23720	mitochondrial carrier protein
TraesCS7D02G026300	11.029	5.56204e-25	1.04976e-22	Up	AT1G32560		Late embryogenesis abundant protein%2C group 1 protein	LOC_Os06g02040	late embryogenesis abundant group 1
TraesCS5A02G219000	11.0254	1.79567e-06	2.11634e-05	Up	AT3G22840	ELIP1	Early light-induced protein 1%2C chloroplastic	LOC_Os07g08160	early light-induced protein
TraesCS7D02G353900	11.0156	3.87255e-15	2.2366e-13	Up	AT3G24503	ALDH2C4	Aldehyde dehydrogenase family 2 member C4	LOC_Os01g40860	aldehyde dehydrogenase
TraesCS1D02G344100	10.9988	1.18751e-12	4.74013e-11	Up	AT5G19730	PME53	Probable pectinesterase 53	LOC_Os05g44600	pectinesterase
TraesCS5A02G153900	10.9982	1.4839e-57	2.60358e-54	Up	AT3G47340	ASN1	Asparagine synthetase	LOC_Os06g15420	asparagine synthetase
TraesCS2D02G360900	10.9811	6.88865e-16	4.47256e-14	Up	AT3G48700	CXE13	Probable carboxylesterase 13	LOC_Os08g37010	gibberellin receptor GID1L2
TraesCS3A02G151300	10.951	4.58442e-15	2.61975e-13	Up	AT1G64110		P-loop containing nucleoside triphosphate hydrolases superfamily protein	LOC_Os01g12660	AAA-type ATPase family protein
TraesCS6B02G165700	10.9225	2.46452e-17	1.954e-15	Up
TraesCS2A02G152500	10.9053	5.04159e-08	8.48891e-07	Up	AT2G46950	CYP709B2	cytochrome P450%2C family 709%2C subfamily B%2C polypeptide 2	LOC_Os07g23570	cytochrome P450 72A1
TraesCS4B02G047400	10.9011	4.91e-57	8.3072e-54	Up	AT1G66200	GLN1-2	Glutamine synthetase cytosolic isozyme 1-2	LOC_Os03g50490	glutamine synthetase
TraesCS3B02G384900	10.8904	9.26082e-37	4.79468e-34	Up	AT1G68660		Ribosomal protein L12/ ATP-dependent Clp protease adaptor protein ClpS family protein	LOC_Os01g61700	ATP-dependent Clp protease adaptor protein ClpS containing protein
TraesCS6A02G137400	10.8851	3.53684e-22	5.03913e-20	Up
TraesCS7B02G093400	10.8808	3.21959e-14	1.61655e-12	Up	AT5G15250	FTSH6	ATP-dependent zinc metalloprotease FTSH 6%2C chloroplastic	LOC_Os06g12370	OsFtsH6 FtsH protease
TraesCSU02G025000	10.8721	2.85533e-13	1.2513e-11	Up	AT5G24960	CYP71A14	Cytochrome P450 71A14	LOC_Os02g09200	cytochrome P450 71D10
TraesCS5A02G292000	10.8589	2.47495e-16	1.70415e-14	Up	AT1G54570		Acyltransferase-like protein At1g54570%2C chloroplastic	LOC_Os09g33530	expressed protein
TraesCS7A02G340500	10.8426	1.44161e-16	1.02236e-14	Up	AT3G03470	CYP89A9	Cytochrome P450 89A9	LOC_Os07g26870	cytochrome P450
TraesCS6A02G260900	10.8384	2.29279e-13	1.01748e-11	Up	AT5G48930	HST	Shikimate O-hydroxycinnamoyltransferase	LOC_Os08g43040	transferase family protein
TraesCS6D02G275600	10.8281	4.19214e-11	1.28043e-09	Up	AT5G07330		unknown protein%3B FUNCTIONS IN: molecular_function unknown%3B INVOLVED IN: biological_process unknown%3B LOCATED IN: mitochondrion%3B BEST Arabidopsis thaliana protein match is: unknown protein (TAIR:AT1G63060.1)%3B Has 1807 Blast hits to 1807 proteins in 27 /.../ies: Archae - 0%3B Bacteria - 0%3B Metazoa - 736%3B Fungi - 347%3B Plants - 385%3B Viruses - 0%3B Other Eukaryotes - 339 (source: NCBI…	LOC_Os11g32890	expressed protein
TraesCS2D02G223600	10.8253	2.31888e-14	1.18567e-12	Up	AT2G03200		Eukaryotic aspartyl protease family protein	LOC_Os07g34940	aspartic proteinase nepenthesin-1 precursor
TraesCS4A02G459600	10.8185	1.52321e-07	2.30355e-06	Up
TraesCS6D02G333000	10.7992	2.04151e-28	5.32852e-26	Up
TraesCS5B02G559400	10.7888	3.81194e-26	7.83441e-24	Up	AT5G50600	HSD1	11-beta-hydroxysteroid dehydrogenase 1A	LOC_Os12g27830	dehydrogenase/reductase
TraesCS7A02G057800	10.7888	1.00858e-05	9.76885e-05	Up	AT4G25480	DREB1A	Dehydration-responsive element-binding protein 1A	LOC_Os06g03670	dehydration-responsive element-binding protein
TraesCS6D02G049600	10.7805	6.12188e-32	2.22231e-29	Up	AT5G66110	HIPP27	Heavy metal transport/detoxification superfamily protein	LOC_Os04g17100	heavy metal-associated domain containing protein
TraesCS3B02G317700	10.7597	5.50469e-13	2.31182e-11	Up	AT3G16300		CASP-like protein 3A1	LOC_Os01g52610	membrane associated DUF588 domain containing protein
TraesCS2D02G264400	10.7573	4.98879e-14	2.44147e-12	Up	AT4G27270		Probable NAD(P)H dehydrogenase (quinone) FQR1-like 1	LOC_Os05g42190	NADPH-dependent FMN reductase domain containing protein
TraesCS3D02G301600	10.7558	1.57948e-05	0.000144911	Up	AT4G33467		unknown protein%3B Has 25 Blast hits to 25 proteins in 9 species: Archae - 0%3B Bacteria - 0%3B Metazoa - 0%3B Fungi - 0%3B Plants - 25%3B Viruses - 0%3B Other Eukaryotes - 0 (source: NCBI BLink).	LOC_Os12g08700	expressed protein
TraesCS4B02G322800	10.7541	1.69853e-22	2.51846e-20	Up	AT2G17500		Auxin efflux carrier family protein	LOC_Os09g38130	auxin efflux carrier component
TraesCS6A02G242400	10.728	2.69196e-22	3.91185e-20	Up	AT4G17550		Putative glycerol-3-phosphate transporter 4	LOC_Os02g43620	transporter
TraesCS4A02G298900	10.7164	0.000143909	0.000989174	Up	AT5G55630	TPK1	Two-pore potassium channel 1	LOC_Os07g01810	potassium channel protein
TraesCS1A02G076200	10.7074	1.1222e-13	5.20438e-12	Up	AT3G06490	MYB108	Transcription factor MYB108	LOC_Os05g04210	MYB family transcription factor
TraesCS4B02G184800	10.7045	1.41395e-11	4.71214e-10	Up	AT4G16160	OEP162	Outer envelope pore protein 16-2%2C chloroplastic	LOC_Os03g19290	mitochondrial import inner membrane translocase subunit Tim17
TraesCS2B02G088900	10.6921	6.37654e-10	1.57413e-08	Up	AT1G05680	UGT74E2	UDP-glycosyltransferase 74E2	LOC_Os04g12980	UDP-glucoronosyl/UDP-glucosyl transferase
TraesCS4B02G017500	10.6876	2.95542e-28	7.52726e-26	Up	AT3G22640	PAP85	cupin family protein	LOC_Os03g46100	cupin domain containing protein
TraesCS6A02G381700	10.6872	0.000434468	0.00256091	Up	AT1G15950	CCR1	Cinnamoyl-CoA reductase 1	LOC_Os02g56680	dehydrogenase
TraesCS2B02G132400	10.6738	8.06079e-13	3.29335e-11	Up	AT3G29630	UGT79B4	UDP-glycosyltransferase 79B4	LOC_Os07g47550	glucosyltransferase
TraesCSU02G003600	10.6729	5.50827e-11	1.65258e-09	Up	AT3G21180	ACA9	Calcium-transporting ATPase 9%2C plasma membrane-type	LOC_Os11g04460	calcium-transporting ATPase
TraesCS4B02G314300	10.6451	2.03531e-09	4.54163e-08	Up	AT1G22360	UGT85A2	UDP-glycosyltransferase 85A2	LOC_Os02g51930	cytokinin-O-glucosyltransferase 2
TraesCS7B02G010700	10.6417	9.07003e-10	2.17532e-08	Up	AT5G45920		GDSL esterase/lipase At5g45920	LOC_Os06g06230	GDSL-like lipase/acylhydrolase
TraesCS1B02G135700	10.6336	6.67453e-21	8.13104e-19	Up	AT1G80160		Lactoylglutathione lyase / glyoxalase I family protein	LOC_Os05g07940	glyoxalase family protein
TraesCS3A02G529500	10.6309	7.7717e-12	2.70812e-10	Up	AT3G16520	UGT88A1	UDP-glycosyltransferase 88A1	LOC_Os01g53350	anthocyanidin 5
TraesCS5D02G269400	10.6203	1.48819e-10	4.13976e-09	Up	AT2G44310		Calcium-binding EF-hand family protein	LOC_Os09g31000	EF hand family protein
TraesCS5A02G184300	10.6192	5.90006e-22	8.2328e-20	Up	AT1G19250	FMO1	Probable flavin-containing monooxygenase 1	LOC_Os04g14710	flavin-containing monooxygenase family protein
TraesCS7B02G290200	10.6186	7.51338e-31	2.49776e-28	Up	AT2G27710	RPP2B	60S acidic ribosomal protein P2-2	LOC_Os08g15180	60S acidic ribosomal protein
TraesCS3D02G228400	10.6164	7.02474e-28	1.74689e-25	Up	AT5G24030	SLAH3	S-type anion channel SLAH3	LOC_Os01g43460	C4-dicarboxylate transporter/malic acid transport protein
TraesCS1A02G231700	10.6075	3.19055e-16	2.16542e-14	Up	AT1G53820	ATL60	RING-H2 finger protein ATL60	LOC_Os05g29710	RING-H2 finger protein
TraesCS1A02G299100	10.5982	1.22867e-43	9.70098e-41	Up	AT3G08860	PYD4	Alanine--glyoxylate aminotransferase 2 homolog 3%2C mitochondrial	LOC_Os05g39770	aminotransferase
TraesCS1D02G356600	10.579	1.03121e-08	2.00581e-07	Up	AT3G14460		Putative disease resistance protein At3g14460	LOC_Os05g45690	expressed protein
TraesCS5A02G424800	10.5722	4.67708e-07	6.33411e-06	Up				LOC_Os11g26780	dehydrin
TraesCS3D02G373600	10.5564	1.54813e-06	1.85435e-05	Up	AT5G64560	MRS2-2	Magnesium transporter MRS2-2	LOC_Os01g64890	CorA-like magnesium transporter protein
TraesCS5D02G311900	10.5546	5.28006e-10	1.32415e-08	Up	AT1G05675	UGT74E1	UDP-glycosyltransferase 74E1	LOC_Os09g34230	UDP-glucoronosyl/UDP-glucosyl transferase
TraesCS4A02G245400	10.5532	6.72845e-08	1.10141e-06	Up	AT3G26590		MATE efflux family protein	LOC_Os03g42830	MATE efflux family protein
TraesCS4D02G101200	10.5531	1.60508e-05	0.000146961	Up	AT4G33467		unknown protein%3B Has 25 Blast hits to 25 proteins in 9 species: Archae - 0%3B Bacteria - 0%3B Metazoa - 0%3B Fungi - 0%3B Plants - 25%3B Viruses - 0%3B Other Eukaryotes - 0 (source: NCBI BLink).	LOC_Os12g08700	expressed protein
TraesCS5B02G426800	10.5511	1.20169e-16	8.65162e-15	Up				LOC_Os11g26780	dehydrin
TraesCS3D02G256500	10.543	6.53611e-12	2.30726e-10	Up	AT4G26890	MAPKKK16	mitogen-activated protein kinase kinase kinase 16	LOC_Os01g50400	STE_MEKK_ste11_MAP3K.5 - STE kinases include homologs to sterile 7
TraesCS7D02G108600	10.5402	2.75108e-16	1.88743e-14	Up	AT5G45920		GDSL esterase/lipase At5g45920	LOC_Os06g06230	GDSL-like lipase/acylhydrolase
TraesCS1D02G419000	10.5355	6.99099e-18	5.95655e-16	Up	AT2G29380	HAI3	Probable protein phosphatase 2C 24	LOC_Os05g49730	protein phosphatase 2C
TraesCS5D02G042400	10.5344	4.22371e-11	1.28965e-09	Up	AT5G07900		Mitochondrial transcription termination factor family protein	LOC_Os06g12100	mTERF family protein
TraesCS2D02G364500	10.5281	2.8807e-101	5.4587e-97	Up	AT2G33380	PXG3	Probable peroxygenase 3	LOC_Os04g43200	caleosin related protein
TraesCS4A02G212000	10.5215	1.57516e-33	6.51702e-31	Up				LOC_Os12g08700	expressed protein
TraesCS1D02G172700	10.5169	1.20288e-06	1.4801e-05	Up				LOC_Os10g34760	RIPER3 - Ripening-related family protein precursor
TraesCS5A02G472300	10.5086	3.16122e-58	5.99025e-55	Up	AT5G24960	CYP71A14	Cytochrome P450 71A14	LOC_Os08g01490	cytochrome P450
TraesCS2D02G209600	10.507	1.24885e-11	4.19586e-10	Up	AT4G21440	ATMYB102	MYB-like 102	LOC_Os07g37210	MYB family transcription factor
TraesCS2B02G293700	10.5021	5.52123e-10	1.37989e-08	Up	AT5G59730	ATEXO70H7	exocyst subunit exo70 family protein H7	LOC_Os11g01050	exo70 exocyst complex subunit domain containing protein
TraesCS5D02G252100	10.502	4.88589e-07	6.58865e-06	Up				LOC_Os12g08530	expressed protein
TraesCS5A02G243900	10.4839	1.30304e-18	1.23212e-16	Up	AT1G05510		Protein of unknown function (DUF1264)	LOC_Os05g49440	DUF1264 domain containing protein
TraesCS5A02G374700	10.4746	1.01822e-09	2.4088e-08	Up				LOC_Os03g44250	expressed protein
TraesCS2B02G515200	10.4646	7.23952e-13	2.98224e-11	Up
TraesCS5A02G205300	10.4537	1.38222e-09	3.18405e-08	Up				LOC_Os09g23590	expressed protein
TraesCS6B02G282100	10.4418	2.52502e-17	1.99696e-15	Up	AT4G17550		Putative glycerol-3-phosphate transporter 4	LOC_Os02g43620	transporter
TraesCS6D02G272400	10.439	2.8145e-25	5.431e-23	Up	AT1G23800	ALDH2B7	Aldehyde dehydrogenase family 2 member B7%2C mitochondrial	LOC_Os06g15990	aldehyde dehydrogenase
TraesCS7D02G052500	10.4317	3.50202e-08	6.0831e-07	Up	AT4G25480	DREB1A	Dehydration-responsive element-binding protein 1A	LOC_Os06g03670	dehydration-responsive element-binding protein
TraesCS7D02G265000	10.4254	9.02953e-07	1.14388e-05	Up	AT5G50080	ERF110	Ethylene-responsive transcription factor ERF110	LOC_Os08g42550	AP2 domain containing protein
TraesCS2B02G089500	10.4143	2.69089e-05	0.000231373	Up	AT2G28370		CASP-like protein 5A2	LOC_Os03g10870	membrane associated DUF588 domain containing protein
TraesCS4A02G184800	10.4125	7.76698e-14	3.68313e-12	Up	AT1G03250		unknown protein%3B Has 89 Blast hits to 89 proteins in 31 species: Archae - 0%3B Bacteria - 0%3B Metazoa - 31%3B Fungi - 0%3B Plants - 48%3B Viruses - 0%3B Other Eukaryotes - 10 (source: NCBI BLink).	LOC_Os12g05000	expressed protein
TraesCS6B02G424200	10.404	2.38929e-14	1.22036e-12	Up
TraesCS7B02G444900	10.3943	0.00191212	0.0090231	Up	AT2G19590	ACO1	1-aminocyclopropane-1-carboxylate oxidase 1	LOC_Os01g39860	1-aminocyclopropane-1-carboxylate oxidase protein
TraesCS3A02G232000	10.3911	8.93818e-10	2.14666e-08	Up	AT3G03341		unknown protein%3B Has 30201 Blast hits to 17322 proteins in 780 species: Archae - 12%3B Bacteria - 1396%3B Metazoa - 17338%3B Fungi - 3422%3B Plants - 5037%3B Viruses - 0%3B Other Eukaryotes - 2996 (source: NCBI BLink).	LOC_Os01g45659	expressed protein
TraesCS1D02G012000	10.3816	1.25211e-19	1.30079e-17	Up	AT2G02120	PDF2.1	Defensin-like protein 4	LOC_Os02g41904	DEF7 - Defensin and Defensin-like DEFL family
TraesCS4D02G174700	10.3763	8.26214e-18	6.95826e-16	Up	AT3G08590		Probable 2%2C3-bisphosphoglycerate-independent phosphoglycerate mutase 2	LOC_Os01g60190	2
TraesCS2A02G075200	10.3718	1.10302e-33	4.64476e-31	Up	AT2G45290	TKL-2	Transketolase-2%2C chloroplastic	LOC_Os04g19740	transketolase
TraesCS7D02G330900	10.3698	1.67846e-12	6.54973e-11	Up	AT4G40070	ATL32	RING-H2 finger protein ATL32	LOC_Os06g34400	zinc finger
TraesCS5B02G342800	10.3654	2.66576e-10	7.03343e-09	Up	AT4G20780	CML42	Calcium-binding protein CML42	LOC_Os05g24780	OsCML21 - Calmodulin-related calcium sensor protein
TraesCS7A02G057700	10.3627	1.20186e-08	2.30043e-07	Up	AT4G25480	DREB1A	Dehydration-responsive element-binding protein 1A	LOC_Os06g03670	dehydration-responsive element-binding protein
TraesCS3A02G152700	10.356	2.89946e-12	1.08625e-10	Up	AT3G48280	CYP71A25	Cytochrome P450 71A25	LOC_Os01g12750	cytochrome P450
TraesCS4A02G183600	10.3469	3.82828e-13	1.65246e-11	Up	AT2G27690	CYP94C1	Cytochrome P450 94C1	LOC_Os11g05380	cytochrome P450
TraesCS1B02G452400	10.342	2.65241e-09	5.78379e-08	Up	AT1G15000	SCPL50	Serine carboxypeptidase-like 50	LOC_Os05g50600	OsSCP31 - Putative Serine Carboxypeptidase homologue
TraesCS3D02G283100	10.3377	1.1822e-13	5.46916e-12	Up	AT1G29680		Protein of unknown function (DUF1264)	LOC_Os01g52830	DUF1264 domain containing protein
TraesCS5D02G360500	10.3099	9.30295e-60	2.20354e-56	Up	AT1G07750		RmlC-like cupins superfamily protein	LOC_Os09g37976	cupin domain containing protein
TraesCS3A02G326800	10.3065	8.69994e-08	1.38885e-06	Up				LOC_Os01g58130	expressed protein
TraesCS4A02G171100	10.3031	0.00486053	0.0195714	Up	AT3G36659		Plant invertase/pectin methylesterase inhibitor superfamily protein	LOC_Os11g45220	IWS1 homolog A
TraesCS3A02G212300	10.2975	3.15974e-20	3.50144e-18	Up	AT3G24503	ALDH2C4	Aldehyde dehydrogenase family 2 member C4	LOC_Os01g40870	aldehyde dehydrogenase
TraesCS5B02G474900	10.2839	0.00051105	0.00294292	Up	AT5G49690	UGT91C1	UDP-glycosyltransferase 91C1	LOC_Os10g03320	UDP-glucoronosyl and UDP-glucosyl transferase domain containing protein
TraesCS6B02G091200	10.2737	1.04843e-10	2.99112e-09	Up	AT1G61680	TPS14	S-(+)-linalool synthase%2C chloroplastic	LOC_Os10g34790	terpene synthase
TraesCS6B02G143000	10.2722	2.2464e-10	6.02597e-09	Up	AT5G23950		Calcium-dependent lipid-binding (CaLB domain) family protein	LOC_Os08g44850	C2 domain containing protein
TraesCS3A02G075900	10.2443	5.8739e-07	7.77166e-06	Up				LOC_Os06g04240	expressed protein
TraesCS5D02G091100	10.2425	0.00136135	0.00677145	Up	AT2G39130		Transmembrane amino acid transporter family protein	LOC_Os12g38570	transmembrane amino acid transporter protein
TraesCS2A02G036200	10.2378	0.000162367	0.00109648	Up	AT5G07860		HXXXD-type acyl-transferase family protein	LOC_Os08g01980	transferase family protein
TraesCS5A02G490400	10.2363	2.13219e-17	1.70622e-15	Up	AT1G47710		Serpin-ZX	LOC_Os03g41438	serpin domain containing protein
TraesCS4A02G258600	10.2162	0.00012638	0.000885062	Up				LOC_Os03g51470	expressed protein
TraesCS5D02G504800	10.213	1.97196e-08	3.61524e-07	Up	AT5G66460	MAN7	Mannan endo-1%2C4-beta-mannosidase 7	LOC_Os03g61280	OsMan05 - Endo-Beta-Mannanase
TraesCS3A02G489300	10.1818	5.38693e-11	1.61926e-09	Up	AT5G12340		unknown protein%3B BEST Arabidopsis thaliana protein match is: unknown protein (TAIR:AT1G28190.1)%3B Has 30201 Blast hits to 17322 proteins in 780 species: Archae - 12%3B Bacteria - 1396%3B Metazoa - 17338%3B Fungi - 3422%3B Plants - 5037%3B Viruses - 0%3B Other Eu /.../es - 2996 (source: NCBI BLink).	LOC_Os01g72360	expressed protein
TraesCS4A02G265000	10.1796	7.11873e-05	0.000538798	Up	AT2G45110	EXPB4	Expansin-B4	LOC_Os05g15690	expansin precursor
TraesCS1B02G248600	10.1656	2.7574e-39	1.70753e-36	Up	AT1G12920	ERF1-2	Eukaryotic peptide chain release factor subunit 1-2	LOC_Os01g71270	eukaryotic peptide chain release factor subunit 1-1
TraesCS4B02G329300	10.1642	9.92207e-09	1.9379e-07	Up	AT5G42290		transcription activator-related	LOC_Os03g04080	expressed protein
TraesCS2A02G398700	10.1605	2.6796e-13	1.1792e-11	Up	AT5G62220	ATGT18	glycosyltransferase 18	LOC_Os06g23420	exostosin family domain containing protein
TraesCS6A02G235600	10.1543	1.07688e-12	4.32696e-11	Up	AT5G53750		CBS domain-containing protein	LOC_Os02g42640	CBS domain-containing protein
TraesCS1B02G219700	10.1509	8.80779e-10	2.11856e-08	Up	AT1G02610		RING/FYVE/PHD zinc finger superfamily protein	LOC_Os01g19800	zinc finger
TraesCS6D02G333600	10.1413	3.09828e-09	6.66704e-08	Up
TraesCS2D02G332300	10.1346	2.45504e-07	3.54472e-06	Up	AT5G56270	WRKY2	Probable WRKY transcription factor 2	LOC_Os04g39570	WRKY35
TraesCS6A02G067600	10.1339	1.07761e-12	4.32808e-11	Up	AT1G61680	TPS14	S-(+)-linalool synthase%2C chloroplastic	LOC_Os02g02930	terpene synthase
TraesCS2D02G157500	10.1296	0.00202822	0.00949152	Up	AT2G46950	CYP709B2	cytochrome P450%2C family 709%2C subfamily B%2C polypeptide 2	LOC_Os07g23570	cytochrome P450 72A1
TraesCS5D02G342800	10.1263	1.89158e-13	8.51398e-12	Up	AT5G48930	HST	Shikimate O-hydroxycinnamoyltransferase	LOC_Os09g37200	transferase family protein
TraesCS2D02G467500	10.1136	3.38487e-11	1.05045e-09	Up				LOC_Os02g33380	pectinesterase inhibitor domain containing protein
TraesCS5B02G443200	10.1114	1.61591e-15	9.85839e-14	Up	AT3G19690		CAP (Cysteine-rich secretory proteins%2C Antigen 5%2C and Pathogenesis-related 1 protein) superfamily protein	LOC_Os07g03710	SCP-like extracellular protein
TraesCS5D02G015700	10.0949	1.9464e-07	2.88348e-06	Up	AT2G22880		VQ motif-containing protein	LOC_Os12g43870	expressed protein
TraesCS1D02G044300	10.0865	5.41873e-19	5.30924e-17	Up	AT3G09220	LAC7	Laccase-7	LOC_Os12g15920	laccase precursor protein
TraesCS1A02G366900	10.0851	3.08539e-14	1.55081e-12	Up	AT2G32510	MAPKKK17	mitogen-activated protein kinase kinase kinase 17	LOC_Os05g46750	STE_MEKK_ste11_MAP3K.18 - STE kinases include homologs to sterile 7
TraesCS7A02G259000	10.0725	1.65626e-10	4.56574e-09	Up	AT1G15680		Putative F-box/kelch-repeat protein At1g15680	LOC_Os08g41750	OsFBX303 - F-box domain containing protein
TraesCS3B02G356800	10.0581	1.37107e-11	4.58213e-10	Up
TraesCS7A02G392300	10.0579	4.71307e-06	4.96546e-05	Up	AT3G30725	GDU6	Protein GLUTAMINE DUMPER 6	LOC_Os06g42660	expressed protein
TraesCS2D02G302100	10.0511	2.17514e-16	1.50545e-14	Up				LOC_Os08g34500	expressed protein
TraesCS5D02G257100	10.0461	5.15633e-13	2.17226e-11	Up	AT1G17840	ABCG11	ABC transporter G family member 11	LOC_Os09g07670	white-brown complex homolog protein 11
TraesCS1A02G168300	10.0424	3.36774e-05	0.000281401	Up				LOC_Os10g34760	RIPER3 - Ripening-related family protein precursor
TraesCS2A02G338600	10.0368	2.73529e-05	0.000234447	Up	AT3G28960		Transmembrane amino acid transporter family protein	LOC_Os04g38680	transmembrane amino acid transporter protein
TraesCS7B02G128900	10.0361	5.34711e-06	5.55847e-05	Up	AT4G02340		alpha/beta-Hydrolases superfamily protein	LOC_Os05g19150	hydrolase
TraesCS2A02G188900	10.0306	5.56392e-11	1.66612e-09	Up	AT3G18830	PLT5	Polyol transporter 5	LOC_Os07g39360	transporter family protein
TraesCS5B02G442900	10.0208	7.96912e-27	1.76e-24	Up	AT3G19690		CAP (Cysteine-rich secretory proteins%2C Antigen 5%2C and Pathogenesis-related 1 protein) superfamily protein	LOC_Os07g03710	SCP-like extracellular protein
TraesCS3B02G309300	10.0102	1.37707e-17	1.12963e-15	Up	AT2G19900	NADP-ME1	NADP-dependent malic enzyme 1	LOC_Os05g09440	NADP-dependent malic enzyme
TraesCS3D02G364000	10.0086	3.38504e-05	0.000282572	Up	AT1G51940	LYK3	LysM domain receptor-like kinase 3	LOC_Os01g36550	protein kinase family protein
TraesCS1D02G097000	10.0076	3.0837e-19	3.09829e-17	Up	AT1G65090		unknown protein%3B BEST Arabidopsis thaliana protein match is: unknown protein (TAIR:AT5G36100.1)%3B Has 1435 Blast hits to 1033 proteins in 192 species: Archae - 0%3B Bacteria - 61%3B Metazoa - 511%3B Fungi - 123%3B Plants - 100%3B Viruses - 42%3B Other Eukaryotes /.../ (source: NCBI BLink).	LOC_Os12g32200	expressed protein
TraesCS5B02G077700	10.0038	2.69264e-12	1.01721e-10	Up	AT4G37360	CYP81D2	cytochrome P450%2C family 81%2C subfamily D%2C polypeptide 2	LOC_Os12g39310	cytochrome P450
TraesCS7B02G194000	9.99905	8.67473e-14	4.087e-12	Up	AT4G02340		alpha/beta-Hydrolases superfamily protein	LOC_Os05g19150	hydrolase
TraesCS2B02G385200	9.99887	0.0025283	0.011412	Up	AT4G26740	PXG1	Peroxygenase 1	LOC_Os04g43200	caleosin related protein
TraesCS1D02G253900	9.99505	2.72651e-12	1.02815e-10	Up	AT5G18860		inosine-uridine preferring nucleoside hydrolase family protein	LOC_Os05g33630	inosine-uridine preferring nucleoside hydrolase family protein
TraesCS1D02G306300	9.98907	3.69943e-19	3.68178e-17	Up	AT1G51370		F-box/FBD/LRR-repeat protein At1g51370	LOC_Os07g18560	OsFBLD6 - F-box
TraesCS3B02G335300	9.97509	2.16195e-10	5.81921e-09	Up	AT2G23170	GH3.3	Indole-3-acetic acid-amido synthetase GH3.3	LOC_Os07g47490	OsGH3.11 - Probable indole-3-acetic acid-amido synthetase
TraesCS5D02G257400	9.96458	2.12128e-15	1.26963e-13	Up	AT1G17840	ABCG11	ABC transporter G family member 11	LOC_Os09g07670	white-brown complex homolog protein 11
TraesCS2D02G521700	9.96187	1.85899e-14	9.64578e-13	Up	AT4G37340	CYP81D3	cytochrome P450%2C family 81%2C subfamily D%2C polypeptide 3	LOC_Os12g39300	cytochrome P450
TraesCS4B02G017600	9.96183	6.62274e-10	1.62897e-08	Up	AT3G22640	PAP85	cupin family protein	LOC_Os03g46100	cupin domain containing protein
TraesCS3D02G293800	9.96082	2.99338e-08	5.28239e-07	Up	AT1G78440	GA2OX1	Gibberellin 2-beta-dioxygenase 1	LOC_Os01g55240	gibberellin 2-beta-dioxygenase
TraesCS4D02G358900	9.95404	5.54548e-11	1.66164e-09	Up	AT3G24520	HSFC1	Heat stress transcription factor C-1	LOC_Os02g13800	HSF-type DNA-binding domain containing protein
TraesCS5B02G443300	9.95273	3.05798e-11	9.55894e-10	Up	AT3G19690		CAP (Cysteine-rich secretory proteins%2C Antigen 5%2C and Pathogenesis-related 1 protein) superfamily protein	LOC_Os07g03710	SCP-like extracellular protein
TraesCS4B02G334200	9.94607	6.21317e-11	1.84018e-09	Up	AT5G23590		DNAJ heat shock N-terminal domain-containing protein	LOC_Os03g04400	heat shock protein DnaJ
TraesCS2D02G406900	9.94594	6.52446e-07	8.55357e-06	Up	AT4G09820	TT8	Transcription factor TT8	LOC_Os04g47040	anthocyanin regulatory Lc protein
TraesCS1B02G448900	9.94524	4.18137e-08	7.17047e-07	Up	AT1G30760		FAD-binding Berberine family protein	LOC_Os08g06190	berberine and berberine like domain containing protein
TraesCS2B02G243200	9.93576	5.86107e-16	3.84832e-14	Up	AT2G03200		Eukaryotic aspartyl protease family protein	LOC_Os07g34940	aspartic proteinase nepenthesin-1 precursor
TraesCS1D02G209400	9.92936	3.17695e-11	9.8949e-10	Up	AT1G02610		RING/FYVE/PHD zinc finger superfamily protein	LOC_Os01g19800	zinc finger
TraesCS1A02G414700	9.92269	1.04155e-08	2.02302e-07	Up				LOC_Os05g50100	expressed protein
TraesCS4B02G055300	9.91968	9.61285e-06	9.36149e-05	Up	AT3G29670	PMAT2	Phenolic glucoside malonyltransferase 2	LOC_Os02g28340	transferase family protein
TraesCS7A02G400300	9.91517	1.13313e-14	6.09999e-13	Up				LOC_Os07g10880	expressed protein
TraesCS2B02G400100	9.91281	7.78312e-12	2.7111e-10	Up				LOC_Os04g43660	expressed protein
TraesCS7B02G342400	9.90893	2.80632e-11	8.8364e-10	Up	AT1G06620		1-aminocyclopropane-1-carboxylate oxidase homolog 1	LOC_Os08g30210	1-aminocyclopropane-1-carboxylate oxidase homolog 1
TraesCS5A02G167100	9.88707	1.8317e-07	2.72957e-06	Up	AT3G02340		RING/U-box superfamily protein	LOC_Os09g06740	zinc finger
TraesCS2D02G414500	9.87165	0.00154484	0.00754316	Up	AT5G47230	ERF5	Ethylene-responsive transcription factor 5	LOC_Os04g46250	AP2 domain containing protein
TraesCS2B02G109900	9.86801	1.93069e-08	3.54781e-07	Up	AT4G02110		BRCT domain-containing protein At4g02110	LOC_Os07g49010	TOPBP1B - Similar to DNA replication protein TOPBP1 from
TraesCS4B02G358000	9.8564	8.84455e-14	4.1608e-12	Up	AT3G60340		alpha/beta-Hydrolases superfamily protein	LOC_Os03g01150	palmitoyl-protein thioesterase 1 precursor
TraesCS3A02G275600	9.85454	2.46148e-46	2.33216e-43	Up	AT2G19900	NADP-ME1	NADP-dependent malic enzyme 1	LOC_Os01g52500	NADP-dependent malic enzyme
TraesCS3D02G320800	9.83969	7.17088e-13	2.95782e-11	Up
TraesCS4D02G361000	9.8316	1.53439e-28	4.06081e-26	Up	AT1G12200		Flavin-containing monooxygenase FMO GS-OX-like 2	LOC_Os10g40570	flavin-containing monooxygenase family protein
TraesCS7A02G113200	9.82777	1.28636e-13	5.92174e-12	Up	AT5G45920		GDSL esterase/lipase At5g45920	LOC_Os06g06230	GDSL-like lipase/acylhydrolase
TraesCS1B02G381700	9.82147	8.70731e-07	1.10706e-05	Up	AT3G15670		Late embryogenesis abundant protein (LEA) family protein	LOC_Os05g46480	late embryogenesis abundant protein
TraesCS3B02G572200	9.81338	4.82539e-27	1.08854e-24	Up
TraesCS5D02G310800	9.81086	1.4036e-13	6.41205e-12	Up	AT5G48930	HST	Shikimate O-hydroxycinnamoyltransferase	LOC_Os09g37180	transferase family protein
TraesCS3B02G556200	9.80823	2.25598e-20	2.56597e-18	Up	AT3G50150		Plant protein of unknown function (DUF247)	LOC_Os08g26850	plant protein of unknown function domain containing protein
TraesCS1A02G088400	9.80597	2.53578e-17	2.0038e-15	Up	AT5G48930	HST	Shikimate O-hydroxycinnamoyltransferase	LOC_Os10g23820	transferase family protein
TraesCS3D02G514300	9.79594	2.7658e-22	4.013e-20	Up	AT4G24220	VEP1	3-oxo-Delta(4%2C5)-steroid 5-beta-reductase	LOC_Os03g32170	NAD dependent epimerase/dehydratase family protein
TraesCS3D02G039400	9.78296	1.51365e-18	1.41572e-16	Up	AT1G03230		Eukaryotic aspartyl protease family protein	LOC_Os01g71080	xylanase inhibitor
TraesCS3D02G329800	9.77963	2.52925e-10	6.71626e-09	Up	AT2G27080		Late embryogenesis abundant (LEA) hydroxyproline-rich glycoprotein family	LOC_Os01g59680	NHL25
TraesCS7B02G337800	9.77485	1.93793e-05	0.000173365	Up	AT5G06760	LEA4-5	Late Embryogenesis Abundant 4-5	LOC_Os08g23870	late embryogenesis abundant group 1
TraesCS1A02G364400	9.77229	4.37045e-05	0.000353072	Up	AT1G52690		Late embryogenesis abundant protein (LEA) family protein	LOC_Os05g46480	late embryogenesis abundant protein
TraesCS3B02G395800	9.76563	7.59098e-11	2.2198e-09	Up	AT5G02040	PRA1A1	PRA1 family protein A1	LOC_Os01g62890	prenylated rab acceptor
TraesCS3D02G181800	9.75624	2.61977e-09	5.72537e-08	Up	AT5G24860	FPF1	Flowering-promoting factor 1	LOC_Os01g15340	flowering promoting factor-like 1
TraesCS1D02G369400	9.745	8.17276e-10	1.97787e-08	Up	AT1G52690		Late embryogenesis abundant protein (LEA) family protein	LOC_Os05g46480	late embryogenesis abundant protein
TraesCS1D02G206300	9.73836	4.07064e-11	1.24706e-09	Up	AT2G42000		Plant EC metallothionein-like protein%2C family 15	LOC_Os10g39610	expressed protein
TraesCS1B02G242700	9.73637	1.90455e-52	2.37432e-49	Up	AT1G72310	ATL3	RING-H2 finger protein ATL3	LOC_Os05g29710	RING-H2 finger protein
TraesCS7B02G167100	9.72069	4.93391e-13	2.08598e-11	Up	AT1G66950	ABCG39	ABC transporter G family member 39	LOC_Os08g29570	pleiotropic drug resistance protein 3
TraesCS3D02G061900	9.71549	1.58966e-12	6.22114e-11	Up	AT2G30770	CYP71A13	cytochrome P450%2C family 71%2C subfamily A%2C polypeptide 13	LOC_Os08g01510	cytochrome P450
TraesCS2B02G112600	9.71267	5.87899e-10	1.4612e-08	Up	AT5G49620	MYB78	myb domain protein 78	LOC_Os03g20090	MYB family transcription factor
TraesCS2D02G280700	9.71125	2.56167e-13	1.13204e-11	Up	AT5G47920		unknown protein%3B BEST Arabidopsis thaliana protein match is: unknown protein (TAIR:AT5G13880.1)%3B Has 1807 Blast hits to 1807 proteins in 277 species: Archae - 0%3B Bacteria - 0%3B Metazoa - 736%3B Fungi - 347%3B Plants - 385%3B Viruses - 0%3B Other Eukaryotes - /.../source: NCBI BLink).	LOC_Os04g31350	expressed protein
TraesCS5B02G181900	9.70151	7.91337e-16	5.0728e-14	Up				LOC_Os09g15540	OsFBX312 - F-box domain containing protein
TraesCS5B02G443800	9.7002	0.0117989	0.0403035	Up	AT3G19690		CAP (Cysteine-rich secretory proteins%2C Antigen 5%2C and Pathogenesis-related 1 protein) superfamily protein	LOC_Os07g03710	SCP-like extracellular protein
TraesCS6B02G188600	9.69447	3.41268e-08	5.95247e-07	Up	AT1G03370		C2 and GRAM domain-containing protein At1g03370	LOC_Os02g10630	GRAM and C2 domains containing protein
TraesCS3B02G039100	9.69377	3.90338e-06	4.20356e-05	Up	AT1G68320	MYB62	myb domain protein 62	LOC_Os01g03720	MYB family transcription factor
TraesCS5B02G002700	9.69205	6.14573e-10	1.52271e-08	Up				LOC_Os03g42520	expressed protein
TraesCS1B02G385000	9.69172	0.00516448	0.0205447	Up	AT2G32510	MAPKKK17	mitogen-activated protein kinase kinase kinase 17	LOC_Os05g46760	STE_MEKK_ste11_MAP3K.19 - STE kinases include homologs to sterile 7
TraesCS1A02G424100	9.67507	1.0421e-20	1.23728e-18	Up	AT4G20820		FAD-binding Berberine family protein	LOC_Os06g35550	retrotransposon protein
TraesCS2B02G168500	9.66974	1.99607e-08	3.65801e-07	Up	AT5G23530	CXE18	Probable carboxylesterase 18	LOC_Os07g44890	gibberellin receptor GID1L2
TraesCS7B02G253700	9.65798	3.8845e-28	9.84067e-26	Up	AT1G11680	CYP51G1	Sterol 14-demethylase	LOC_Os02g02230	cytochrome P450
TraesCS5D02G507500	9.65202	9.98479e-06	9.6819e-05	Up	AT1G14870	PCR2	Protein PLANT CADMIUM RESISTANCE 2	LOC_Os03g61470	uncharacterized Cys-rich domain containing protein
TraesCS2A02G152200	9.65201	2.00413e-08	3.67066e-07	Up	AT2G46960	CYP709B1	cytochrome P450%2C family 709%2C subfamily B%2C polypeptide 1	LOC_Os07g44130	cytochrome P450 72A1
TraesCS5B02G076400	9.65175	5.63761e-24	9.74709e-22	Up	AT3G19580	AZF2	Zinc finger protein AZF2	LOC_Os12g39400	ZOS12-09 - C2H2 zinc finger protein
TraesCS4A02G372900	9.65171	2.75506e-08	4.89371e-07	Up	AT2G27830		unknown protein%3B BEST Arabidopsis thaliana protein match is: unknown protein (TAIR:AT4G22758.1)%3B Has 131 Blast hits to 131 proteins in 17 species: Archae - 0%3B Bacteria - 0%3B Metazoa - 0%3B Fungi - 0%3B Plants - 131%3B Viruses - 0%3B Other Eukaryotes - 0 (sou /.../CBI BLink).	LOC_Os06g04480	expressed protein
TraesCS4A02G431600	9.64756	1.29941e-08	2.47117e-07	Up	AT2G20340	ELI5	Tyrosine decarboxylase 1	LOC_Os08g04540	decarboxylase
TraesCS7A02G223900	9.64472	0.00294034	0.012946	Up	AT5G04370	NAMT1	S-adenosyl-L-methionine-dependent methyltransferases superfamily protein	LOC_Os02g48770	SAM dependent carboxyl methyltransferase
TraesCS7B02G128800	9.64331	4.10822e-14	2.03257e-12	Up	AT4G02340		alpha/beta-Hydrolases superfamily protein	LOC_Os05g19150	hydrolase
TraesCS3B02G495800	9.64267	3.69181e-10	9.48524e-09	Up	AT2G23620	MES1	Methylesterase 1	LOC_Os01g70850	esterase
TraesCS5D02G168500	9.63647	1.30817e-09	3.02672e-08	Up	AT4G31830		unknown protein%3B Has 42 Blast hits to 42 proteins in 10 species: Archae - 0%3B Bacteria - 0%3B Metazoa - 0%3B Fungi - 0%3B Plants - 42%3B Viruses - 0%3B Other Eukaryotes - 0 (source: NCBI BLink).	LOC_Os09g04100	expressed protein
TraesCS3A02G331300	9.63487	6.48788e-16	4.23056e-14	Up	AT5G15100	PIN5	Putative auxin efflux carrier component 5	LOC_Os01g58860	auxin efflux carrier component
TraesCS3B02G261300	9.6345	4.3479e-11	1.32458e-09	Up	AT3G03341		unknown protein%3B Has 30201 Blast hits to 17322 proteins in 780 species: Archae - 12%3B Bacteria - 1396%3B Metazoa - 17338%3B Fungi - 3422%3B Plants - 5037%3B Viruses - 0%3B Other Eukaryotes - 2996 (source: NCBI BLink).	LOC_Os01g45659	expressed protein
TraesCS2A02G542400	9.63422	2.83663e-10	7.44485e-09	Up	AT2G32300	UCC1	uclacyanin 1	LOC_Os08g04340	plastocyanin-like domain containing protein
TraesCS5D02G257000	9.61458	0.00184151	0.00874609	Up	AT1G17840	ABCG11	ABC transporter G family member 11	LOC_Os09g07670	white-brown complex homolog protein 11
TraesCS1B02G307700	9.61201	2.7268e-14	1.38305e-12	Up	AT5G01670		NAD(P)-linked oxidoreductase superfamily protein	LOC_Os05g39690	oxidoreductase
TraesCS4D02G236800	9.60782	3.22934e-13	1.40739e-11	Up	AT3G49680	BCAT3	Branched-chain-amino-acid aminotransferase 3%2C chloroplastic	LOC_Os03g12890	aminotransferase domain containing protein
TraesCS5D02G379200	9.60326	1.16971e-12	4.67619e-11	Up
TraesCS7D02G520100	9.60037	1.93476e-08	3.55392e-07	Up	AT2G45910	PUB33	U-box domain-containing protein 33	LOC_Os02g57700	protein kinase
TraesCS5A02G548700	9.59977	3.01647e-08	5.31915e-07	Up	AT3G24520	HSFC1	Heat stress transcription factor C-1	LOC_Os02g13800	HSF-type DNA-binding domain containing protein
TraesCS2B02G264000	9.59391	3.0007e-25	5.77854e-23	Up	AT1G30135	TIFY5A	Protein TIFY 5A	LOC_Os07g05830	zinc-finger protein
TraesCS3A02G488300	9.57545	6.58667e-17	4.9255e-15	Up	AT3G09270	GSTU8	Glutathione S-transferase U8	LOC_Os01g72120	glutathione S-transferase
TraesCS3A02G237000	9.56594	2.22305e-10	5.9701e-09	Up	AT2G21820		unknown protein%3B Has 45 Blast hits to 45 proteins in 13 species: Archae - 0%3B Bacteria - 0%3B Metazoa - 0%3B Fungi - 0%3B Plants - 45%3B Viruses - 0%3B Other Eukaryotes - 0 (source: NCBI BLink).	LOC_Os01g46600	seed maturation protein PM41
TraesCS5A02G477100	9.56567	7.82516e-05	0.000585025	Up	AT3G46070		C2H2-type zinc finger family protein	LOC_Os03g60570	ZOS3-22 - C2H2 zinc finger protein
TraesCS5D02G384600	9.56246	2.06431e-08	3.7714e-07	Up				LOC_Os12g42170	expressed protein
TraesCS7D02G188400	9.53614	0.0018354	0.00872011	Up	AT1G74590	GSTU10	Glutathione S-transferase U10	LOC_Os06g12290	glutathione S-transferase GSTU6
TraesCS2B02G391300	9.52781	2.08444e-06	2.41257e-05	Up				LOC_Os02g47490	expressed protein
TraesCS2B02G073600	9.52738	1.46665e-08	2.76151e-07	Up	AT1G62870		unknown protein%3B BEST Arabidopsis thaliana protein match is: unknown protein (TAIR:AT1G12380.1)%3B Has 351 Blast hits to 343 proteins in 42 species: Archae - 2%3B Bacteria - 0%3B Metazoa - 27%3B Fungi - 5%3B Plants - 299%3B Viruses - 0%3B Other Eukaryotes - 18 (s /.../ NCBI BLink).	LOC_Os04g19140	expressed protein
TraesCS5B02G394000	9.525	2.72357e-14	1.38215e-12	Up	AT3G47010		Glycosyl hydrolase family protein	LOC_Os03g53860	periplasmic beta-glucosidase precursor
TraesCS1B02G441400	9.50993	0.00067983	0.0037492	Up	AT3G11410	PP2CA	Protein phosphatase 2C 37	LOC_Os05g49730	protein phosphatase 2C
TraesCS4B02G278400	9.50708	7.26701e-17	5.41289e-15	Up				LOC_Os03g11270	expressed protein
TraesCS2B02G244600	9.50197	2.78301e-08	4.94059e-07	Up	AT3G21720	ICL	Isocitrate lyase	LOC_Os07g34520	isocitrate lyase
TraesCS1D02G188900	9.50021	1.74936e-10	4.79723e-09	Up	AT5G62150		peptidoglycan-binding LysM domain-containing protein	LOC_Os10g38040	lysM domain containing protein
TraesCS6A02G067500	9.4977	1.21487e-09	2.83229e-08	Up	AT1G61680	TPS14	S-(+)-linalool synthase%2C chloroplastic	LOC_Os02g02930	terpene synthase
TraesCS4D02G054100	9.48933	6.29077e-16	4.11335e-14	Up	AT5G66780		unknown protein%3B Has 1807 Blast hits to 1807 proteins in 277 species: Archae - 0%3B Bacteria - 0%3B Metazoa - 736%3B Fungi - 347%3B Plants - 385%3B Viruses - 0%3B Other Eukaryotes - 339 (source: NCBI BLink).	LOC_Os03g51350	expressed protein
TraesCS2D02G035200	9.48927	7.62479e-15	4.20255e-13	Up	AT5G67150		HXXXD-type acyl-transferase family protein	LOC_Os08g01980	transferase family protein
TraesCS2D02G396600	9.48142	1.64414e-09	3.73115e-08	Up	AT1G12570		Glucose-methanol-choline (GMC) oxidoreductase family protein	LOC_Os02g45530	HOTHEAD precursor
TraesCS2B02G299100	9.46643	9.65574e-15	5.24566e-13	Up	AT5G47920		unknown protein%3B BEST Arabidopsis thaliana protein match is: unknown protein (TAIR:AT5G13880.1)%3B Has 1807 Blast hits to 1807 proteins in 277 species: Archae - 0%3B Bacteria - 0%3B Metazoa - 736%3B Fungi - 347%3B Plants - 385%3B Viruses - 0%3B Other Eukaryotes - /.../source: NCBI BLink).	LOC_Os04g31350	expressed protein
TraesCS2B02G515300	9.4629	4.66277e-06	4.91794e-05	Up
TraesCS5D02G223400	9.46179	0.000102295	0.000738386	Up	AT3G53690		RING/U-box superfamily protein	LOC_Os09g26470	zinc finger
TraesCS5D02G491600	9.46027	3.16684e-19	3.17845e-17	Up	AT3G53600		C2H2-type zinc finger family protein	LOC_Os03g60560	ZOS3-21 - C2H2 zinc finger protein
TraesCS2D02G464500	9.45894	0.000244755	0.00156559	Up	AT2G15490	UGT73B4	UDP-glycosyltransferase 73B4	LOC_Os01g45110	anthocyanin 3-O-beta-glucosyltransferase
TraesCS3B02G416900	9.4566	3.91437e-06	4.21253e-05	Up	AT5G19000	BPM1	BTB/POZ and MATH domain-containing protein 1	LOC_Os10g29380	MBTB52 - Bric-a-Brac
TraesCS7A02G162600	9.44804	9.5588e-11	2.74909e-09	Up				LOC_Os03g18850	pathogenesis-related Bet v I family protein
TraesCS3B02G371300	9.44677	8.23825e-14	3.89297e-12	Up	AT4G01950	GPAT3	Probable glycerol-3-phosphate acyltransferase 3	LOC_Os11g45400	glycerol-3-phosphate acyltransferase
TraesCS2A02G534600	9.44626	1.28997e-29	3.79564e-27	Up	AT4G37330	CYP81D4	cytochrome P450%2C family 81%2C subfamily D%2C polypeptide 4	LOC_Os03g55240	cytochrome P450
TraesCS5A02G361400	9.42862	0.000508537	0.00293141	Up	AT2G31510	ARI7	Probable E3 ubiquitin-protein ligase ARI7	LOC_Os09g38630	expressed protein
TraesCS7A02G240600	9.41863	4.1311e-16	2.77199e-14	Up	AT5G56220		P-loop containing nucleoside triphosphate hydrolases superfamily protein	LOC_Os08g38970	transmembrane receptor
TraesCS3A02G379900	9.41758	3.60366e-11	1.11325e-09	Up	AT5G50080	ERF110	Ethylene-responsive transcription factor ERF110	LOC_Os01g64790	AP2 domain containing protein
TraesCS2A02G413800	9.40744	5.9626e-09	1.21831e-07	Up	AT1G02070		unknown protein%3B BEST Arabidopsis thaliana protein match is: unknown protein (TAIR:AT3G60520.1)%3B Has 98 Blast hits to 98 proteins in 13 species: Archae - 0%3B Bacteria - 0%3B Metazoa - 0%3B Fungi - 0%3B Plants - 98%3B Viruses - 0%3B Other Eukaryotes - 0 (source /.../ BLink).	LOC_Os04g46600	zinc finger protein
TraesCS3D02G130300	9.39959	6.13567e-05	0.000474594	Up	AT1G80170		Probable polygalacturonase At1g80170	LOC_Os01g07790	polygalacturonase
TraesCS7D02G067500	9.39908	4.20799e-06	4.48723e-05	Up				LOC_Os06g04240	expressed protein
TraesCS2D02G379200	9.38548	1.84242e-08	3.40542e-07	Up				LOC_Os04g43660	expressed protein
TraesCS2A02G097200	9.38354	2.03978e-07	3.00608e-06	Up	AT3G06490	MYB108	Transcription factor MYB108	LOC_Os07g48870	MYB family transcription factor
TraesCSU02G069000	9.38157	1.66962e-09	3.78119e-08	Up	AT5G49620	MYB78	myb domain protein 78	LOC_Os11g45740	MYB family transcription factor
TraesCS3A02G288800	9.38148	2.13344e-32	8.0532e-30	Up	AT5G19600	SULTR3%3B5	Probable sulfate transporter 3.5	LOC_Os01g52130	sulfate transporter
TraesCS1B02G147400	9.37903	2.84137e-05	0.000242225	Up	AT5G24030	SLAH3	S-type anion channel SLAH3	LOC_Os05g13320	C4-dicarboxylate transporter/malic acid transport protein
TraesCS4A02G221500	9.37896	0.00312524	0.0136328	Up	AT1G69640	SBH1	Sphinganine C(4)-monooxygenase 1	LOC_Os06g22490	sphingolipid C4-hydroxylase SUR2
TraesCS4D02G093700	9.37574	4.83365e-14	2.37167e-12	Up				LOC_Os11g07950	expressed protein
TraesCS2D02G312900	9.37356	1.419e-06	1.71573e-05	Up
TraesCS7D02G142400	9.37209	2.12193e-07	3.11455e-06	Up	AT5G20400		2-oxoglutarate (2OG) and Fe(II)-dependent oxygenase superfamily protein	LOC_Os06g07932	flavonol synthase/flavanone 3-hydroxylase
TraesCS7B02G065100	9.37057	3.1657e-08	5.55955e-07	Up				LOC_Os06g09600	expressed protein
TraesCS5B02G399200	9.36916	1.39427e-10	3.89679e-09	Up	AT3G02100	UGT83A1	UDP-glycosyltransferase 83A1	LOC_Os03g55040	UDP-glucoronosyl and UDP-glucosyl transferase domain containing protein
TraesCS3A02G279600	9.36582	2.13669e-11	6.88347e-10	Up	AT3G16520	UGT88A1	UDP-glycosyltransferase 88A1	LOC_Os01g53420	anthocyanidin 5
TraesCS3B02G545900	9.36091	5.39462e-07	7.20259e-06	Up	AT1G27930		Protein of unknown function (DUF579)	LOC_Os11g29780	plant-specific domain TIGR01627 family protein
TraesCS4B02G101700	9.35976	5.75347e-27	1.2887e-24	Up				LOC_Os11g09180	expressed protein
TraesCS3A02G231800	9.35877	0.000114586	0.000814015	Up
TraesCS4D02G247800	9.35746	2.38531e-12	9.07991e-11	Up	AT4G35800	NRPB1	DNA-directed RNA polymerase II subunit 1	LOC_Os04g35670	retrotransposon protein
TraesCS1A02G013600	9.35527	3.57869e-07	4.96655e-06	Up	AT2G02100	PDF2.2	Defensin-like protein 2	LOC_Os02g41904	DEF7 - Defensin and Defensin-like DEFL family
TraesCS4B02G240700	9.35398	1.46406e-08	2.75718e-07	Up	AT3G22840	ELIP1	Early light-induced protein 1%2C chloroplastic	LOC_Os07g08150	early light-induced protein
TraesCS1A02G047400	9.35064	1.4959e-09	3.42924e-08	Up				LOC_Os03g26490	expressed protein
TraesCS2D02G353000	9.33619	3.83502e-13	1.65461e-11	Up	AT2G24800	PER18	Peroxidase 18	LOC_Os04g42100	retrotransposon protein
TraesCS2D02G267100	9.3307	2.78933e-09	6.05724e-08	Up	AT5G59080		unknown protein%3B FUNCTIONS IN: molecular_function unknown%3B INVOLVED IN: response to oxidative stress%3B LOCATED IN: chloroplast%3B EXPRESSED IN: 18 plant structures%3B EXPRESSED DURING: 9 growth stages%3B BEST Arabidopsis thaliana protein match is: unknown /.../n (TAIR:AT3G46880.1)%3B Has 1807 Blast hits to 1807 proteins in 277 species: Archae - 0%3B Bacteria - 0%3B Metazoa - 736%3B Fungi - 3…	LOC_Os05g38040	expressed protein
TraesCS3D02G483000	9.32098	6.75514e-09	1.36436e-07	Up	AT3G09270	GSTU8	Glutathione S-transferase U8	LOC_Os01g72120	glutathione S-transferase
TraesCS2D02G437900	9.32066	0.000417904	0.00247544	Up	AT4G35160		O-methyltransferase family protein	LOC_Os08g35310	O-methyltransferase
TraesCS1D02G335500	9.3174	0.00190088	0.00897874	Up	AT5G57110	ACA8	Calcium-transporting ATPase 8%2C plasma membrane-type	LOC_Os10g28240	calcium-transporting ATPase
TraesCS3D02G238600	9.31235	3.27177e-13	1.42326e-11	Up	AT4G23750	CRF2	Ethylene-responsive transcription factor CRF2	LOC_Os01g46870	AP2 domain containing protein
TraesCS3A02G421000	9.31077	5.27637e-10	1.32358e-08	Up	AT2G31980	CYS2	Cysteine proteinase inhibitor 2	LOC_Os01g68660	cysteine proteinase inhibitor precursor protein
TraesCS3B02G598200	9.29987	5.22807e-30	1.59787e-27	Up	AT3G16520	UGT88A1	UDP-glycosyltransferase 88A1	LOC_Os01g53350	anthocyanidin 5
TraesCS1D02G449100	9.29246	6.19817e-10	1.5349e-08	Up	AT3G06190	BPM2	BTB/POZ and MATH domain-containing protein 2	LOC_Os02g20720	MBTB2 - Bric-a-Brac
TraesCS2A02G128500	9.29193	7.08629e-10	1.72996e-08	Up	AT3G59140	ABCC10	ABC transporter C family member 10	LOC_Os06g06440	ABC transporter
TraesCS5B02G200000	9.2894	1.15655e-10	3.27294e-09	Up	AT3G28210	SAP12	Zinc finger AN1 domain-containing stress-associated protein 12	LOC_Os09g21710	AN1-like zinc finger domain containing protein
TraesCS5B02G442000	9.28727	7.06235e-14	3.36754e-12	Up				LOC_Os03g58180	basic proline-rich protein precursor
TraesCS4A02G166600	9.2868	5.13987e-13	2.16629e-11	Up	AT2G19260		RING/FYVE/PHD zinc finger superfamily protein	LOC_Os04g34720	PHD-finger domain containing protein
TraesCS7D02G417600	9.28125	1.1134e-56	1.78797e-53	Up	AT4G31750	WIN2	Probable protein phosphatase 2C 59	LOC_Os06g48300	protein phosphatase 2C
TraesCS5A02G002400	9.26956	1.16869e-09	2.73066e-08	Up	AT3G63520	CCD1	Carotenoid 9%2C10(9'%2C10')-cleavage dioxygenase 1	LOC_Os12g44310	carotenoid cleavage dioxygenase
TraesCS5D02G226900	9.26952	7.76906e-16	4.98704e-14	Up	AT3G22840	ELIP1	Early light-induced protein 1%2C chloroplastic	LOC_Os07g08160	early light-induced protein
TraesCS2D02G135400	9.26915	6.87452e-10	1.6839e-08	Up	AT5G46290	KAS1	3-oxoacyl-	LOC_Os06g09630	3-oxoacyl-synthase
TraesCS5D02G528100	9.26391	4.22362e-17	3.24288e-15	Up	AT4G37070	PLP1	Patatin-like protein 1	LOC_Os11g39990	patatin
TraesCS5A02G433800	9.26091	7.21822e-13	2.97605e-11	Up	AT2G48130		Bifunctional inhibitor/lipid-transfer protein/seed storage 2S albumin superfamily protein	LOC_Os03g57990	LTPL74 - Protease inhibitor/seed storage/LTP family protein precursor
TraesCS5B02G231600	9.25738	9.14324e-07	1.1569e-05	Up	AT2G45550	CYP76C4	Cytochrome P450 76C4	LOC_Os09g27510	cytochrome P450
TraesCS6D02G164700	9.24969	3.30074e-10	8.56565e-09	Up
TraesCS4D02G186100	9.24603	1.90227e-13	8.55805e-12	Up	AT4G16160	OEP162	Outer envelope pore protein 16-2%2C chloroplastic	LOC_Os03g19290	mitochondrial import inner membrane translocase subunit Tim17
TraesCS5D02G395600	9.24499	2.2649e-10	6.07215e-09	Up	AT3G22490		Seed maturation protein	LOC_Os03g06360	late embryogenesis abundant protein D-34
TraesCS1A02G168200	9.23297	1.25636e-09	2.91895e-08	Up				LOC_Os10g34760	RIPER3 - Ripening-related family protein precursor
TraesCS6A02G178500	9.23153	4.31688e-30	1.33662e-27	Up	AT1G15520	ABCG40	ABC transporter G family member 40	LOC_Os01g08260	pleiotropic drug resistance protein 4
TraesCS4B02G328600	9.22732	1.13959e-05	0.000108733	Up	AT2G17040	anac036	NAC domain containing protein 36	LOC_Os03g04070	no apical meristem protein
TraesCS2B02G577500	9.22349	1.06755e-09	2.5142e-08	Up	AT1G47128	RD21A	Cysteine proteinase RD21a	LOC_Os04g57490	cysteine protease
TraesCS4B02G086400	9.22034	0.00268878	0.0120166	Up	AT2G43870		Pectin lyase-like superfamily protein	LOC_Os11g14410	polygalacturonase
TraesCS1D02G117300	9.21606	4.59234e-06	4.8523e-05	Up	AT1G80160		Lactoylglutathione lyase / glyoxalase I family protein	LOC_Os05g07940	glyoxalase family protein
TraesCS6A02G120600	9.21543	6.442e-12	2.27829e-10	Up	AT4G37790	HAT22	Homeobox-leucine zipper protein HAT22	LOC_Os02g05640	homeobox associated leucine zipper
TraesCS1D02G074000	9.21449	5.68119e-07	7.54091e-06	Up				LOC_Os08g31270	expressed protein
TraesCS6D02G241700	9.20483	2.4305e-16	1.67476e-14	Up	AT5G48930	HST	Shikimate O-hydroxycinnamoyltransferase	LOC_Os08g43040	transferase family protein
TraesCS2B02G248200	9.20256	2.67377e-15	1.57641e-13	Up	AT4G28400		Probable protein phosphatase 2C 58	LOC_Os07g32380	protein phosphatase 2C
TraesCS7A02G229400	9.20153	2.49064e-06	2.82957e-05	Up	AT1G18100	MFT	Protein MOTHER of FT and TF 1	LOC_Os06g30370	osMFT1 MFT-Like1 homologous to Mother of FT and TFL1 gene; contains Pfam profile PF01161: Phosphatidylethanolamine-binding protein
TraesCS2D02G364600	9.19588	0.00832547	0.0303258	Up	AT2G33380	PXG3	Probable peroxygenase 3	LOC_Os04g43200	caleosin related protein
TraesCS5D02G473000	9.19468	1.52343e-08	2.85536e-07	Up	AT2G35530	bZIP16	basic region/leucine zipper transcription factor 16	LOC_Os07g10890	transcription factor
TraesCS3B02G172600	9.19101	1.42278e-06	1.71942e-05	Up	AT2G05642		Nucleic acid-binding%2C OB-fold-like protein	LOC_Os03g63870	expressed protein
TraesCS1D02G292100	9.18541	1.03358e-27	2.49179e-25	Up	AT3G08860	PYD4	Alanine--glyoxylate aminotransferase 2 homolog 3%2C mitochondrial	LOC_Os05g39770	aminotransferase
TraesCS3D02G443400	9.18497	0.00012223	0.000860068	Up	AT4G13420	POT5	Potassium transporter 5	LOC_Os01g70660	potassium transporter
TraesCS5A02G256200	9.1813	0.000182677	0.00121306	Up
TraesCS7D02G380500	9.17936	4.71197e-07	6.37408e-06	Up	AT4G25000	AMY1	Alpha-amylase 1	LOC_Os08g36910	alpha-amylase precursor
TraesCS5B02G455600	9.16219	0.0015867	0.00771375	Up	AT5G02560	HTA12	Probable histone H2A.4	LOC_Os01g31800	Core histone H2A/H2B/H3/H4 domain containing protein
TraesCS3A02G157300	9.15562	2.4511e-10	6.52704e-09	Up	AT2G33770	UBC24	Probable ubiquitin-conjugating enzyme E2 24	LOC_Os01g13280	ubiquitin conjugating enzyme protein
TraesCS5B02G251900	9.1513	0.00172651	0.00828127	Up	AT1G55850	CSLE1	Cellulose synthase-like protein E1	LOC_Os09g30130	CSLE6 - cellulose synthase-like family E
TraesCS2A02G330500	9.15113	6.30406e-07	8.29217e-06	Up	AT5G56270	WRKY2	Probable WRKY transcription factor 2	LOC_Os04g39570	WRKY35
TraesCS2D02G192200	9.15011	0.000111403	0.000795045	Up	AT5G42330		unknown protein%3B Has 35333 Blast hits to 34131 proteins in 2444 species: Archae - 798%3B Bacteria - 22429%3B Metazoa - 974%3B Fungi - 991%3B Plants - 531%3B Viruses - 0%3B Other Eukaryotes - 9610 (source: NCBI BLink).	LOC_Os07g29190	expressed protein
TraesCS7D02G357700	9.14552	2.03701e-24	3.63463e-22	Up	AT3G05140	RBK2	Receptor-like cytosolic serine/threonine-protein kinase RBK2	LOC_Os11g42440	expressed protein
TraesCS1B02G375400	9.1429	7.81179e-05	0.00058421	Up	AT5G63370	CDKG1	Cyclin-dependent kinase G1	LOC_Os12g23700	cyclin-dependent kinase G-2
TraesCS7B02G147600	9.14051	3.62476e-06	3.93663e-05	Up	AT4G27880	SINAT4	E3 ubiquitin-protein ligase SINAT4	LOC_Os01g03190	expressed protein
TraesCS3B02G059700	9.14012	5.82646e-46	5.25747e-43	Up	AT3G18270	CYP77A5P	cytochrome P450%2C family 77%2C subfamily A%2C polypeptide 5 pseudogene	LOC_Os01g04630	muconate cycloisomerase
TraesCS4A02G187500	9.13264	0.00058105	0.0032775	Up	AT5G13750	ZIFL1	Protein ZINC INDUCED FACILITATOR-LIKE 1	LOC_Os11g04104	major facilitator superfamily antiporter
TraesCS2B02G172300	9.13259	0.00048192	0.00280209	Up	AT5G44410		FAD-binding Berberine family protein	LOC_Os06g35550	retrotransposon protein
TraesCS1B02G282300	9.13144	3.69833e-08	6.40026e-07	Up	AT5G64750	ABR1	Ethylene-responsive transcription factor ABR1	LOC_Os05g36100	AP2 domain containing protein
TraesCS1D02G249000	9.12569	1.31034e-07	2.01411e-06	Up	AT1G54820		Protein kinase superfamily protein	LOC_Os05g33080	serine/threonine-protein kinase
TraesCS5B02G152600	9.12237	5.13096e-17	3.88289e-15	Up	AT3G47340	ASN1	Asparagine synthetase	LOC_Os06g15420	asparagine synthetase
TraesCS3D02G514400	9.11597	0.00107216	0.00553281	Up	AT4G24220	VEP1	3-oxo-Delta(4%2C5)-steroid 5-beta-reductase	LOC_Os03g32170	NAD dependent epimerase/dehydratase family protein
TraesCS6D02G021100	9.11334	4.6802e-07	6.33744e-06	Up	AT1G22360	UGT85A2	UDP-glycosyltransferase 85A2	LOC_Os02g51930	cytokinin-O-glucosyltransferase 2
TraesCS7B02G163700	9.11153	1.05792e-11	3.60682e-10	Up				LOC_Os08g42630	expressed protein
TraesCS7B02G378100	9.10709	8.17355e-06	8.10308e-05	Up	AT4G16730	TPS02	terpene synthase 02	LOC_Os04g27340	terpene synthase
TraesCS7B02G052200	9.10622	4.46563e-12	1.62045e-10	Up	AT1G73080	PEPR1	Leucine-rich repeat receptor-like protein kinase PEPR1	LOC_Os08g34640	receptor-like protein kinase precursor
TraesCS1D02G153800	9.09472	1.96243e-07	2.90383e-06	Up				LOC_Os04g30750	expressed protein
TraesCS5D02G254100	9.08474	0.0021905	0.010127	Up	AT1G28220	PUP3	Purine permease 3	LOC_Os09g29210	purine permease
TraesCS3A02G154900	9.08273	2.2651e-12	8.65708e-11	Up	AT3G06880		Transducin/WD40 repeat-like superfamily protein	LOC_Os01g12930	U-box domain containing protein
TraesCS7A02G225600	9.07513	2.3245e-20	2.63442e-18	Up	AT4G02340		alpha/beta-Hydrolases superfamily protein	LOC_Os05g19150	hydrolase
TraesCS7D02G173700	9.07239	2.70871e-10	7.12689e-09	Up	AT2G07050	CAS1	Cycloartenol synthase	LOC_Os02g04760	cycloartenol synthase
TraesCS7A02G374200	9.06794	5.22171e-08	8.75795e-07	Up	AT1G34300		G-type lectin S-receptor-like serine/threonine-protein kinase At1g34300	LOC_Os06g06960	S-locus-like receptor protein kinase
TraesCS2D02G094800	9.06634	8.98054e-13	3.64554e-11	Up	AT1G09250	BHLH149	Transcription factor bHLH149	LOC_Os03g19780	expressed protein
TraesCS6B02G411300	9.06537	1.46131e-07	2.2213e-06	Up	AT4G36930	SPT	Transcription factor SPATULA	LOC_Os02g56140	helix-loop-helix DNA-binding domain containing protein
TraesCS5B02G291100	9.0612	1.21232e-17	1.00205e-15	Up	AT1G54570		Acyltransferase-like protein At1g54570%2C chloroplastic	LOC_Os09g33530	expressed protein
TraesCS6B02G322700	9.06066	4.8798e-05	0.000388164	Up	AT3G57230	AGL16	Agamous-like MADS-box protein AGL16	LOC_Os02g49840	OsMADS57 - MADS-box family gene with MIKCc type-box
TraesCS4B02G307300	9.04275	3.39648e-17	2.63556e-15	Up	AT2G16950	TRN1	Transportin-1	LOC_Os04g59494	transportin-2
TraesCS3B02G565300	9.04259	0.0042323	0.0175068	Up				LOC_Os03g24200	OsFBX85 - F-box domain containing protein
TraesCS1A02G207600	9.03189	1.57745e-07	2.37687e-06	Up	AT5G52420		unknown protein%3B FUNCTIONS IN: molecular_function unknown%3B INVOLVED IN: biological_process unknown%3B LOCATED IN: endoplasmic reticulum%3B EXPRESSED IN: 24 plant structures%3B EXPRESSED DURING: 13 growth stages%3B BEST Arabidopsis thaliana protein match is: /.../wn protein (TAIR:AT5G23920.1)%3B Has 30201 Blast hits to 17322 proteins in 780 species: Archae - 12%3B Bacteria - 1396%3B Metazoa - …	LOC_Os10g40040	expressed protein
TraesCS2A02G217500	9.02446	0.00255008	0.0114905	Up	AT4G23220	CRK14	cysteine-rich RLK (RECEPTOR-like protein kinase) 14	LOC_Os07g34980	TKL_IRAK_DUF26-lh.9 - DUF26 kinases have homology to DUF26 containing loci
TraesCS5A02G249900	9.02268	9.77315e-10	2.3248e-08	Up	AT1G17840	ABCG11	ABC transporter G family member 11	LOC_Os09g07670	white-brown complex homolog protein 11
TraesCS7A02G160200	9.02167	1.63028e-10	4.50065e-09	Up				LOC_Os06g09600	expressed protein
TraesCS2D02G224200	9.02135	2.53691e-05	0.00021997	Up	AT3G21720	ICL	Isocitrate lyase	LOC_Os07g34520	isocitrate lyase
TraesCS4B02G008300	9.02021	2.51059e-11	7.97147e-10	Up	AT2G27470	NF-YB11	nuclear factor Y%2C subunit B11	LOC_Os09g39490	histone-like transcription factor and archaeal histone
TraesCS1B02G304800	9.01597	7.31916e-38	4.07918e-35	Up	AT5G01300		PEBP (phosphatidylethanolamine-binding protein) family protein	LOC_Os05g39250	phosphatidylethanolamine-binding protein
TraesCS1B02G444700	9.00374	0.000144646	0.000993882	Up				LOC_Os05g50100	expressed protein
TraesCS5A02G338700	9.00346	1.2038e-10	3.39551e-09	Up	AT5G48930	HST	Shikimate O-hydroxycinnamoyltransferase	LOC_Os09g37200	transferase family protein
TraesCS3A02G512400	9.00323	2.88865e-09	6.24715e-08	Up	AT1G43710	SDC	Serine decarboxylase	LOC_Os02g33710	decarboxylase
TraesCS1A02G381400	8.99873	3.48273e-10	8.98868e-09	Up				LOC_Os06g04240	expressed protein
TraesCS5D02G159800	8.99708	2.28033e-06	2.61786e-05	Up	AT2G38240		2-oxoglutarate (2OG) and Fe(II)-dependent oxygenase superfamily protein	LOC_Os11g25060	flavonol synthase/flavanone 3-hydroxylase
TraesCS2B02G090100	8.99657	1.83845e-12	7.14494e-11	Up	AT2G45290	TKL-2	Transketolase-2%2C chloroplastic	LOC_Os04g19740	transketolase
TraesCS3A02G025400	8.98943	2.58257e-08	4.61676e-07	Up	AT3G26430		GDSL esterase/lipase At3g26430	LOC_Os07g39740	GDSL-like lipase/acylhydrolase
TraesCS4A02G107300	8.98614	2.75994e-09	6.00091e-08	Up	AT1G07900	LBD1	LOB domain-containing protein 1	LOC_Os03g17810	DUF260 domain containing protein
TraesCS2A02G195600	8.98578	3.61966e-05	0.00029944	Up	AT3G26770		NAD(P)-binding Rossmann-fold superfamily protein	LOC_Os07g40250	sex determination protein tasselseed-2
TraesCS2A02G206400	8.98354	0.000952191	0.00500118	Up	AT4G21440	ATMYB102	MYB-like 102	LOC_Os07g37210	MYB family transcription factor
TraesCS1D02G242300	8.98229	3.50235e-08	6.0831e-07	Up	AT3G15670		Late embryogenesis abundant protein (LEA) family protein	LOC_Os05g46480	late embryogenesis abundant protein
TraesCS3A02G315700	8.97914	1.59809e-08	2.98351e-07	Up	AT1G27410	AT1G27420/F17L21.21	DNA repair metallo-beta-lactamase family protein	LOC_Os01g57440	DNA repair metallo-beta-lactamase
TraesCS1B02G444000	8.97568	1.0256e-09	2.42549e-08	Up	AT2G25625		unknown protein%3B FUNCTIONS IN: molecular_function unknown%3B INVOLVED IN: biological_process unknown%3B LOCATED IN: chloroplast%3B EXPRESSED IN: 10 plant structures%3B EXPRESSED DURING: LP.06 six leaves visible%2C LP.04 four leaves visible%2C 4 anthesis%2C petal /.../entiation and expansion stage%3B Has 24 Blast hits to 24 proteins in 9 species: Archae - 0%3B Bacteria - 0%3B Metazoa - 0%3B Fung…	LOC_Os05g49940	expressed protein
TraesCS5B02G253900	8.97439	0.000287404	0.00179751	Up	AT1G55790		Domain of unknown function (DUF2431)	LOC_Os09g30200	ATP binding protein
TraesCS3A02G260800	8.96351	5.51274e-09	1.13398e-07	Up	AT1G10360	GSTU18	Glutathione S-transferase U18	LOC_Os01g49710	glutathione S-transferase
TraesCS5B02G094000	8.96022	1.00118e-12	4.03649e-11	Up				LOC_Os09g21330	expressed protein
TraesCS1B02G285400	8.95281	1.17548e-15	7.31749e-14	Up	AT2G27500		Glucan endo-1%2C3-beta-glucosidase 14	LOC_Os01g64170	glycosyl hydrolases family 17
TraesCS5A02G433700	8.94511	1.47753e-14	7.82504e-13	Up	AT2G32030		Acyl-CoA N-acyltransferases (NAT) superfamily protein	LOC_Os03g58010	acetyltransferase
TraesCS2A02G367700	8.94504	1.86022e-11	6.05249e-10	Up	AT2G33380	PXG3	Probable peroxygenase 3	LOC_Os04g43200	caleosin related protein
TraesCS4B02G136200	8.94503	1.52029e-08	2.85062e-07	Up	AT5G42380	CML37	Calcium-binding protein CML37	LOC_Os11g01390	OsCML25 - Calmodulin-related calcium sensor protein
TraesCS2B02G452600	8.94407	5.87579e-09	1.20213e-07	Up	AT4G22170		Putative F-box protein At4g22170	LOC_Os03g40370	OsFBDUF15 - F-box and DUF domain containing protein
TraesCS2A02G368000	8.94243	6.45311e-09	1.30866e-07	Up	AT4G26740	PXG1	Peroxygenase 1	LOC_Os04g43200	caleosin related protein
TraesCSU02G116600	8.94157	0.00313664	0.0136741	Up	AT1G61680	TPS14	S-(+)-linalool synthase%2C chloroplastic	LOC_Os02g02930	terpene synthase
TraesCS5D02G342600	8.93808	1.75078e-08	3.24745e-07	Up	AT1G03670		ankyrin repeat family protein	LOC_Os11g08050	expressed protein
TraesCS7B02G235200	8.93622	1.48366e-11	4.92539e-10	Up	AT4G40070	ATL32	RING-H2 finger protein ATL32	LOC_Os06g34400	zinc finger
TraesCS3B02G323700	8.933	6.67411e-09	1.34943e-07	Up	AT3G22550		Protein of unknown function (DUF581)	LOC_Os01g52100	DUF581 domain containing protein
TraesCS5D02G082700	8.93056	3.98505e-18	3.52537e-16	Up	AT3G19580	AZF2	Zinc finger protein AZF2	LOC_Os12g39400	ZOS12-09 - C2H2 zinc finger protein
TraesCS3D02G305300	8.92886	1.38935e-27	3.28267e-25	Up	AT4G33420	PER47	Peroxidase 47	LOC_Os07g44499	peroxidase
TraesCS5B02G491300	8.92385	0.00607183	0.0234569	Up	AT3G46070		C2H2-type zinc finger family protein	LOC_Os03g60570	ZOS3-22 - C2H2 zinc finger protein
TraesCS6B02G447400	8.92339	1.95492e-05	0.000174753	Up	AT5G23750		Remorin family protein	LOC_Os02g57840	remorin C-terminal domain containing protein
TraesCS2A02G325100	8.92127	2.1744e-08	3.95347e-07	Up	AT3G26310	CYP71B35	Cytochrome P450 71B35	LOC_Os04g40470	cytochrome P450
TraesCS1D02G062900	8.91572	1.83415e-09	4.1307e-08	Up	AT2G38905		Low temperature and salt responsive protein family	LOC_Os05g03130	OsRCI2-7 - Putative low temperature and salt responsive protein
TraesCS4B02G133900	8.91262	0.000239524	0.0015367	Up	AT1G03250		unknown protein%3B Has 89 Blast hits to 89 proteins in 31 species: Archae - 0%3B Bacteria - 0%3B Metazoa - 31%3B Fungi - 0%3B Plants - 48%3B Viruses - 0%3B Other Eukaryotes - 10 (source: NCBI BLink).	LOC_Os12g05000	expressed protein
TraesCS4A02G092000	8.91201	1.45261e-11	4.83249e-10	Up	AT2G40390		unknown protein%3B BEST Arabidopsis thaliana protein match is: unknown protein (TAIR:AT5G64190.1)%3B Has 75 Blast hits to 75 proteins in 11 species: Archae - 0%3B Bacteria - 0%3B Metazoa - 0%3B Fungi - 0%3B Plants - 74%3B Viruses - 0%3B Other Eukaryotes - 1 (source /.../ BLink).	LOC_Os07g12800	expressed protein
TraesCS1A02G089700	8.9108	3.09617e-23	4.93025e-21	Up	AT1G17070	STIPL1	Septin and tuftelin-interacting protein 1 homolog 1	LOC_Os12g42140	G-patch domain containing protein
TraesCS4A02G394600	8.90129	0.00682287	0.0257607	Up	AT3G29590	5MAT	Malonyl-CoA:anthocyanidin 5-O-glucoside-6''-O-malonyltransferase	LOC_Os06g05320	transferase family protein
TraesCS3D02G287500	8.89475	0.00029363	0.00183097	Up	AT4G29480		Mitochondrial ATP synthase subunit G protein	LOC_Os05g45740	mitochondrial ATP synthase g subunit family protein
TraesCS4A02G123800	8.88444	2.60861e-07	3.74591e-06	Up	AT5G65510	AIL7	AP2-like ethylene-responsive transcription factor AIL7	LOC_Os03g19900	AP2 domain containing protein
TraesCS1D02G078600	8.88035	1.16762e-09	2.72884e-08	Up	AT3G06490	MYB108	Transcription factor MYB108	LOC_Os05g04210	MYB family transcription factor
TraesCS1D02G414700	8.87733	1.27401e-33	5.29417e-31	Up	AT4G22220	ISU1	Iron-sulfur cluster assembly protein 1	LOC_Os05g49300	iron-sulfur cluster assembly enzyme ISCU
TraesCS7D02G379100	8.87608	2.52e-08	4.51683e-07	Up	AT4G38580	HIPP26	Heavy metal-associated isoprenylated plant protein 26	LOC_Os04g17100	heavy metal-associated domain containing protein
TraesCS3B02G565100	8.87276	1.51709e-07	2.2965e-06	Up	AT5G49610		F-box protein At5g49610	LOC_Os03g24200	OsFBX85 - F-box domain containing protein
TraesCS3B02G266800	8.87206	1.31823e-07	2.0236e-06	Up	AT4G23750	CRF2	Ethylene-responsive transcription factor CRF2	LOC_Os01g46870	AP2 domain containing protein
TraesCS7D02G227500	8.86803	2.41977e-10	6.45995e-09	Up	AT5G06760	LEA4-5	Late Embryogenesis Abundant 4-5	LOC_Os06g21910	late embryogenesis abundant group 1
TraesCS5D02G099100	8.86417	5.56226e-13	2.3329e-11	Up	AT5G49620	MYB78	myb domain protein 78	LOC_Os12g37690	MYB family transcription factor
TraesCS5B02G380300	8.86252	7.89322e-12	2.74743e-10	Up	AT3G48880		F-box/LRR-repeat protein At3g48880	LOC_Os03g43770	OsFBX97 - F-box domain containing protein
TraesCS6D02G290400	8.85317	2.84761e-08	5.04109e-07	Up	AT1G71250		GDSL esterase/lipase At1g71250	LOC_Os02g50690	GDSL-like lipase/acylhydrolase
TraesCS5A02G550700	8.84965	1.379e-06	1.67249e-05	Up	AT3G24520	HSFC1	Heat stress transcription factor C-1	LOC_Os02g13800	HSF-type DNA-binding domain containing protein
TraesCS5B02G518600	8.84678	1.28844e-07	1.98302e-06	Up	AT4G19580		DNAJ heat shock N-terminal domain-containing protein	LOC_Os03g62150	heat shock protein DnaJ
TraesCS4B02G099700	8.8385	0.000166839	0.0011226	Up	AT1G69640	SBH1	Sphinganine C(4)-monooxygenase 1	LOC_Os06g22490	sphingolipid C4-hydroxylase SUR2
TraesCS6B02G177100	8.83755	1.36526e-17	1.12188e-15	Up	AT5G13210		Uncharacterised conserved protein UCP015417%2C vWA	LOC_Os02g08330	gp176
TraesCS6D02G080300	8.82701	4.99653e-10	1.25771e-08	Up				LOC_Os03g51350	expressed protein
TraesCS5B02G355900	8.82673	1.62609e-10	4.49172e-09	Up	AT1G07750		RmlC-like cupins superfamily protein	LOC_Os09g37976	cupin domain containing protein
TraesCS7B02G152200	8.82372	1.39559e-11	4.65916e-10	Up	AT3G07390	AIR12	auxin-responsive family protein	LOC_Os08g41290	AIR12
TraesCS4D02G095700	8.81924	4.7019e-07	6.36319e-06	Up	AT4G32890	GATA9	GATA transcription factor 9	LOC_Os03g03850	GATA zinc finger domain containing protein
TraesCS3B02G153800	8.81815	9.55656e-11	2.74909e-09	Up	AT4G18700	CIPK12	CBL-interacting serine/threonine-protein kinase 12	LOC_Os01g10870	CAMK_KIN1/SNF1/Nim1_like.7 - CAMK includes calcium/calmodulin depedent protein kinases
TraesCS5B02G218600	8.81358	5.44842e-08	9.09953e-07	Up	AT3G22840	ELIP1	Early light-induced protein 1%2C chloroplastic	LOC_Os07g08160	early light-induced protein
TraesCS5B02G307600	8.8093	1.88916e-07	2.80593e-06	Up	AT1G73270	SCPL6	Serine carboxypeptidase-like 6	LOC_Os10g01134	OsSCP46 - Putative Serine Carboxypeptidase homologue
TraesCS2A02G335800	8.80912	3.39855e-06	3.71823e-05	Up	AT3G21670	NPF6.4	Protein NRT1/ PTR FAMILY 6.4	LOC_Os04g39030	peptide transporter PTR2
TraesCS4B02G385800	8.80819	8.03567e-06	7.9831e-05	Up	AT3G24520	HSFC1	Heat stress transcription factor C-1	LOC_Os02g13800	HSF-type DNA-binding domain containing protein
TraesCS2B02G437000	8.80127	4.70727e-07	6.36954e-06	Up	AT1G16510	SAUR41	Auxin-responsive protein SAUR41	LOC_Os04g52670	OsSAUR21 - Auxin-responsive SAUR gene family member
TraesCS1A02G207500	8.79658	2.52907e-07	3.64329e-06	Up	AT4G11410		NAD(P)-binding Rossmann-fold superfamily protein	LOC_Os10g40020	oxidoreductase
TraesCS6D02G038500	8.79247	6.7184e-08	1.09995e-06	Up	AT2G36690		2-oxoglutarate (2OG) and Fe(II)-dependent oxygenase superfamily protein	LOC_Os07g07410	oxidoreductase
TraesCS3B02G059500	8.79024	6.89631e-07	8.98512e-06	Up	AT5G38200		Class I glutamine amidotransferase-like superfamily protein	LOC_Os01g04620	transposon protein
TraesCS5A02G304000	8.79004	2.5316e-10	6.71873e-09	Up	AT5G48930	HST	Shikimate O-hydroxycinnamoyltransferase	LOC_Os09g37180	transferase family protein
TraesCS5B02G181800	8.78485	1.21976e-12	4.8619e-11	Up				LOC_Os09g15540	OsFBX312 - F-box domain containing protein
TraesCS5A02G183600	8.76997	2.37727e-32	8.93797e-30	Up	AT2G29380	HAI3	Probable protein phosphatase 2C 24	LOC_Os09g15670	protein phosphatase 2C
TraesCS5B02G502500	8.7631	1.74087e-06	2.05864e-05	Up	AT5G06740	LECRKS5	Probable L-type lectin-domain containing receptor kinase S.5	LOC_Os02g06160	cysteine-rich receptor-like protein kinase 16 precursor
TraesCS3A02G356600	8.75731	0.000359003	0.00217384	Up	AT2G28710		C2H2-type zinc finger family protein	LOC_Os01g62190	ZOS1-15 - C2H2 zinc finger protein
TraesCS5A02G478300	8.74907	1.27737e-19	1.32413e-17	Up	AT3G53600		C2H2-type zinc finger family protein	LOC_Os03g60560	ZOS3-21 - C2H2 zinc finger protein
TraesCS5D02G259200	8.74886	2.45455e-08	4.41332e-07	Up
TraesCS4D02G330000	8.74042	7.3424e-08	1.19263e-06	Up	AT2G17705		unknown protein%3B FUNCTIONS IN: molecular_function unknown%3B INVOLVED IN: biological_process unknown%3B LOCATED IN: plasma membrane%3B EXPRESSED IN: cultured cell%3B BEST Arabidopsis thaliana protein match is: unknown protein (TAIR:AT4G08330.1)%3B Has 135 Bla /.../s to 135 proteins in 32 species: Archae - 5%3B Bacteria - 29%3B Metazoa - 0%3B Fungi - 0%3B Plants - 91%3B Viruses - 0%3B Other Euka…	LOC_Os03g04370	protein-methionine-S-oxide reductase
TraesCS6D02G248000	8.73735	0.000106483	0.000764188	Up	AT1G65060	4CL3	4-coumarate--CoA ligase 3	LOC_Os02g46970	AMP-binding domain containing protein
TraesCS1D02G426600	8.73683	1.59092e-46	1.52256e-43	Up	AT1G30760		FAD-binding Berberine family protein	LOC_Os08g06190	berberine and berberine like domain containing protein
TraesCS2B02G132700	8.73365	9.12681e-07	1.15513e-05	Up	AT5G49690	UGT91C1	UDP-glycosyltransferase 91C1	LOC_Os07g47550	glucosyltransferase
TraesCS3D02G020700	8.72887	0.00263835	0.011823	Up	AT3G26430		GDSL esterase/lipase At3g26430	LOC_Os07g39740	GDSL-like lipase/acylhydrolase
TraesCS5D02G505400	8.72765	4.13456e-05	0.000336136	Up				LOC_Os03g61240	expressed protein
TraesCS2B02G284300	8.72594	2.88148e-05	0.000245225	Up	AT4G27270		Probable NAD(P)H dehydrogenase (quinone) FQR1-like 1	LOC_Os05g42190	NADPH-dependent FMN reductase domain containing protein
TraesCS1B02G335700	8.72374	0.000624032	0.0034818	Up				LOC_Os10g04540	expressed protein
TraesCS4B02G102000	8.71706	5.83994e-14	2.82302e-12	Up	AT2G03200		Eukaryotic aspartyl protease family protein	LOC_Os12g26470	aspartic proteinase nepenthesin-1 precursor
TraesCS5B02G291000	8.70875	3.58243e-11	1.10741e-09	Up	AT3G26840		Acyltransferase-like protein At3g26840%2C chloroplastic	LOC_Os09g33530	expressed protein
TraesCS7D02G368400	8.70636	0.000638458	0.00355142	Up	AT2G42760		unknown protein%3B CONTAINS InterPro DOMAIN/s: Protein of unknown function DUF1685 (InterPro:IPR012881)%3B Has 170 Blast hits to 164 proteins in 34 species: Archae - 0%3B Bacteria - 1%3B Metazoa - 26%3B Fungi - 10%3B Plants - 107%3B Viruses - 0%3B Other Eukaryotes /.../source: NCBI BLink).	LOC_Os06g35770	expressed protein
TraesCS3D02G079700	8.7061	8.672e-08	1.38486e-06	Up	AT2G02360	PP2B10	F-box protein PP2-B10	LOC_Os08g05480	OsFBX261 - F-box domain containing protein
TraesCS5B02G033300	8.70563	4.91871e-06	5.16261e-05	Up	AT3G03341		unknown protein%3B Has 30201 Blast hits to 17322 proteins in 780 species: Archae - 12%3B Bacteria - 1396%3B Metazoa - 17338%3B Fungi - 3422%3B Plants - 5037%3B Viruses - 0%3B Other Eukaryotes - 2996 (source: NCBI BLink).	LOC_Os01g45659	expressed protein
TraesCS2D02G566700	8.70241	3.04128e-07	4.29432e-06	Up	AT1G72610	GLP1	Germin-like protein subfamily 3 member 1	LOC_Os04g22080	retrotransposon protein
TraesCS7A02G373800	8.69794	3.4228e-05	0.000285401	Up	AT5G11260	HY5	Transcription factor HY5	LOC_Os06g39960	bZIP transcription factor domain containing protein
TraesCS2B02G245100	8.69766	1.02105e-10	2.91914e-09	Up	AT5G64700		WAT1-related protein At5g64700	LOC_Os07g34110	integral membrane protein DUF6 containing protein
TraesCS1D02G009100	8.69347	1.83076e-12	7.12349e-11	Up				LOC_Os10g22520	cellulase
TraesCS3A02G213100	8.69159	7.90434e-44	6.40089e-41	Up	AT4G18670	LRX5	Leucine-rich repeat extensin-like protein 5	LOC_Os01g41120	retrotransposon protein
TraesCS2B02G303600	8.69154	3.48631e-05	0.000289952	Up	AT5G13220	TIFY9	Protein TIFY 9	LOC_Os04g32480	zinc-finger protein
TraesCS5D02G159100	8.69081	2.28455e-63	8.01674e-60	Up	AT3G47340	ASN1	Asparagine synthetase	LOC_Os06g15420	asparagine synthetase
TraesCS5B02G160800	8.68867	8.28304e-17	6.10727e-15	Up	AT4G31830		unknown protein%3B Has 42 Blast hits to 42 proteins in 10 species: Archae - 0%3B Bacteria - 0%3B Metazoa - 0%3B Fungi - 0%3B Plants - 42%3B Viruses - 0%3B Other Eukaryotes - 0 (source: NCBI BLink).	LOC_Os09g04100	expressed protein
TraesCS7A02G268000	8.68668	7.46852e-06	7.49034e-05	Up	AT3G07040	RPM1	Disease resistance protein RPM1	LOC_Os08g42700	resistance protein
TraesCS7A02G199600	8.68624	4.77653e-08	8.08282e-07	Up				LOC_Os06g13940	expressed protein
TraesCS2A02G183900	8.68345	8.9586e-08	1.42654e-06	Up	AT2G23170	GH3.3	Indole-3-acetic acid-amido synthetase GH3.3	LOC_Os07g40290	OsGH3.8 - Probable indole-3-acetic acid-amido synthetase
TraesCS6D02G046200	8.67939	4.24977e-10	1.08065e-08	Up	AT3G46030	HTB11	Histone H2B.7	LOC_Os01g05630	Core histone H2A/H2B/H3/H4 domain containing protein
TraesCS5A02G392100	8.67695	0.00323267	0.0140111	Up
TraesCS3B02G484100	8.67181	0.000560197	0.00318185	Up	AT1G18835	MIF3	Mini zinc finger protein 3	LOC_Os05g50310	ZF-HD protein dimerisation region containing protein
TraesCS3A02G247500	8.66611	0.000413186	0.00245192	Up	AT3G55210	anac063	NAC domain containing protein 63	LOC_Os01g48446	no apical meristem protein
TraesCS4B02G097300	8.66228	7.74194e-09	1.54551e-07	Up				LOC_Os11g07950	expressed protein
TraesCS4A02G025100	8.66109	7.01577e-07	9.12069e-06	Up	AT3G56640	SEC15A	Exocyst complex component SEC15A	LOC_Os03g06760	exocyst complex component 6
TraesCS2A02G542300	8.65948	4.5367e-12	1.6431e-10	Up	AT2G32300	UCC1	uclacyanin 1	LOC_Os08g04340	plastocyanin-like domain containing protein
TraesCS4A02G020000	8.65686	9.63683e-07	1.21287e-05	Up				LOC_Os03g07180	embryonic protein DC-8
TraesCS5A02G466500	8.64944	1.12436e-08	2.16697e-07	Up				LOC_Os01g04050	BBTI12 - Bowman-Birk type bran trypsin inhibitor precursor
TraesCS7A02G323300	8.64156	9.8205e-06	9.53626e-05	Up	AT5G64620	C/VIF2	Cell wall / vacuolar inhibitor of fructosidase 2	LOC_Os08g01670	invertase/pectin methylesterase inhibitor family protein
TraesCS7A02G345600	8.6356	9.0656e-09	1.78497e-07	Up	AT1G15710	TYRAAT2	Arogenate dehydrogenase 2%2C chloroplastic	LOC_Os06g35050	arogenate dehydrogenase 1
TraesCS3B02G522200	8.63186	0.000156994	0.00106544	Up	AT3G07040	RPM1	Disease resistance protein RPM1	LOC_Os11g42660	Leucine Rich Repeat family protein
TraesCS4D02G101100	8.62505	1.68596e-11	5.54454e-10	Up	AT4G33467		unknown protein%3B Has 25 Blast hits to 25 proteins in 9 species: Archae - 0%3B Bacteria - 0%3B Metazoa - 0%3B Fungi - 0%3B Plants - 25%3B Viruses - 0%3B Other Eukaryotes - 0 (source: NCBI BLink).	LOC_Os12g08700	expressed protein
TraesCS3A02G076100	8.62335	0.00016251	0.00109721	Up
TraesCS2D02G512000	8.6174	7.56106e-08	1.22479e-06	Up	AT3G16150		Probable isoaspartyl peptidase/L-asparaginase 2	LOC_Os04g55710	transposon protein
TraesCS4A02G051500	8.59684	1.74695e-08	3.24161e-07	Up	AT5G43070	WPP1	WPP domain-containing protein 1	LOC_Os03g11060	MFP1 attachment factor 1
TraesCS4A02G281700	8.5951	7.60509e-09	1.52079e-07	Up	AT4G38070	BHLH131	basic helix-loop-helix (bHLH) DNA-binding superfamily protein	LOC_Os03g48490	centromere protein
TraesCS6D02G241900	8.59408	7.59745e-25	1.41978e-22	Up	AT5G17300	RVE1	Protein REVEILLE 1	LOC_Os02g46030	MYB family transcription factor
TraesCS5A02G128000	8.59129	0.00763783	0.0282269	Up				LOC_Os11g05530	expressed protein
TraesCS6A02G181000	8.58984	1.88999e-09	4.24233e-08	Up	AT3G26330	CYP71B37	Cytochrome P450 71B37	LOC_Os02g09390	cytochrome P450
TraesCS3A02G093900	8.58964	1.51592e-19	1.56287e-17	Up	AT2G38870		Serine protease inhibitor%2C potato inhibitor I-type family protein	LOC_Os12g25090	expressed protein
TraesCS7A02G195100	8.58594	5.68563e-06	5.87065e-05	Up	AT1G19260		TTF-type zinc finger protein with HAT dimerisation domain	LOC_Os05g14440	transposon protein
TraesCS7B02G042500	8.58332	5.68613e-11	1.69842e-09	Up	AT5G20400		2-oxoglutarate (2OG) and Fe(II)-dependent oxygenase superfamily protein	LOC_Os06g07932	flavonol synthase/flavanone 3-hydroxylase
TraesCS5A02G536600	8.5814	1.73008e-11	5.67583e-10	Up	AT1G12200		Flavin-containing monooxygenase FMO GS-OX-like 2	LOC_Os10g40570	flavin-containing monooxygenase family protein
TraesCS2D02G126500	8.58044	4.71105e-10	1.19027e-08	Up				LOC_Os07g46800	expressed protein
TraesCS1D02G453000	8.57565	8.94531e-08	1.4249e-06	Up	AT2G20030	ATL12	Putative RING-H2 finger protein ATL12	LOC_Os05g51780	zinc finger
TraesCS3B02G536100	8.57499	9.58855e-21	1.14418e-18	Up	AT3G09270	GSTU8	Glutathione S-transferase U8	LOC_Os01g72120	glutathione S-transferase
TraesCS7A02G240400	8.57443	3.57642e-10	9.21043e-09	Up	AT4G34050	CCOAOMT1	Caffeoyl-CoA O-methyltransferase 1	LOC_Os08g38910	caffeoyl-CoA O-methyltransferase
TraesCS1A02G242800	8.57156	9.54383e-10	2.27711e-08	Up	AT2G41710		AP2-like ethylene-responsive transcription factor At2g41710	LOC_Os05g32270	AP2 domain containing protein
TraesCS5D02G491500	8.55479	2.24483e-05	0.000197465	Up	AT3G53600		C2H2-type zinc finger family protein	LOC_Os03g60560	ZOS3-21 - C2H2 zinc finger protein
TraesCS4B02G180600	8.55243	2.22363e-06	2.55649e-05	Up	AT5G65510	AIL7	AP2-like ethylene-responsive transcription factor AIL7	LOC_Os03g19900	AP2 domain containing protein
TraesCS4B02G130000	8.54474	1.97165e-07	2.91565e-06	Up	AT1G19715	JAL3	Jacalin-related lectin 3	LOC_Os12g09700	Jacalin-like lectin domain containing protein
TraesCS1D02G097900	8.54158	5.15019e-07	6.90965e-06	Up	AT1G17070	STIPL1	Septin and tuftelin-interacting protein 1 homolog 1	LOC_Os12g42140	G-patch domain containing protein
TraesCS3A02G454100	8.54143	1.07613e-07	1.68165e-06	Up
TraesCS5D02G001800	8.53603	2.94537e-05	0.000250055	Up				LOC_Os03g42520	expressed protein
TraesCS7B02G414500	8.52924	2.82683e-05	0.00024118	Up	AT5G42830		HXXXD-type acyl-transferase family protein	LOC_Os11g13970	transferase family protein
TraesCSU02G049500	8.52858	1.91454e-06	2.24082e-05	Up	AT2G38870		Serine protease inhibitor%2C potato inhibitor I-type family protein	LOC_Os12g25090	expressed protein
TraesCS6A02G224400	8.52748	9.33446e-10	2.23126e-08	Up	AT2G31180	ATMYB14	myb domain protein 14	LOC_Os02g41510	MYB family transcription factor
TraesCS1B02G247400	8.52575	5.95529e-11	1.77155e-09	Up
TraesCS2D02G383500	8.52102	1.09245e-05	0.000104731	Up	AT1G62710	bVPE	Vacuolar-processing enzyme beta-isozyme	LOC_Os02g43010	vacuolar-processing enzyme precursor
TraesCS3B02G212400	8.51057	7.75568e-10	1.88609e-08	Up				LOC_Os01g16140	expressed protein
TraesCS5D02G558800	8.50082	2.06212e-10	5.57108e-09	Up	AT1G04560		AWPM-19-like family protein	LOC_Os07g24000	AWPM-19-like membrane family protein
TraesCS1A02G093000	8.49335	0.000454192	0.00266128	Up				LOC_Os05g05930	peripheral-type benzodiazepine receptor
TraesCS5D02G479200	8.49318	0.00540426	0.0213222	Up				LOC_Os01g04040	BBTI11 - Bowman-Birk type bran trypsin inhibitor precursor
TraesCS2D02G165500	8.48704	4.88137e-12	1.75451e-10	Up	AT5G43580		Serine protease inhibitor%2C potato inhibitor I-type family protein	LOC_Os01g42860	inhibitor I family protein
TraesCS5B02G319300	8.48656	2.38309e-05	0.000207966	Up	AT1G32940	SBT3.5	Subtilisin-like protease SBT3.5	LOC_Os09g36110	OsSub59 - Putative Subtilisin homologue
TraesCS7A02G252800	8.48136	4.33821e-12	1.57784e-10	Up	AT4G30130		Protein of unknown function (DUF630 and DUF632)	LOC_Os08g40830	pumilio domain-containing protein PPD1
TraesCS4D02G190100	8.47802	7.15188e-05	0.000540878	Up	AT3G51680	SDR2A	Short-chain dehydrogenase reductase 2a	LOC_Os03g18740	oxidoreductase
TraesCS7D02G340400	8.47315	2.76047e-11	8.70072e-10	Up	AT3G22490		Seed maturation protein	LOC_Os06g23350	late embryogenesis abundant protein D-34
TraesCS5A02G267800	8.47146	8.30282e-08	1.33129e-06	Up	AT1G09310		Protein of unknown function%2C DUF538	LOC_Os07g02850	DUF538 domain containing protein
TraesCS7B02G192700	8.46856	5.57466e-10	1.39177e-08	Up	AT5G06760	LEA4-5	Late Embryogenesis Abundant 4-5	LOC_Os06g21910	late embryogenesis abundant group 1
TraesCS2A02G073500	8.46377	1.33702e-26	2.85309e-24	Up	AT1G05675	UGT74E1	UDP-glycosyltransferase 74E1	LOC_Os04g12980	UDP-glucoronosyl/UDP-glucosyl transferase
TraesCS2B02G211000	8.45117	1.63576e-06	1.94701e-05	Up	AT5G42330		unknown protein%3B Has 35333 Blast hits to 34131 proteins in 2444 species: Archae - 798%3B Bacteria - 22429%3B Metazoa - 974%3B Fungi - 991%3B Plants - 531%3B Viruses - 0%3B Other Eukaryotes - 9610 (source: NCBI BLink).	LOC_Os07g29190	expressed protein
TraesCS6B02G205900	8.44608	1.42315e-16	1.01002e-14	Up	AT1G15520	ABCG40	ABC transporter G family member 40	LOC_Os01g08260	pleiotropic drug resistance protein 4
TraesCS4B02G177800	8.44505	7.48066e-08	1.21343e-06	Up				LOC_Os03g20440	VQ domain containing protein
TraesCS6B02G341100	8.43823	4.87586e-07	6.57606e-06	Up	AT2G23540		GDSL esterase/lipase At2g23540	LOC_Os02g50690	GDSL-like lipase/acylhydrolase
TraesCS6D02G191800	8.43757	0.000127171	0.000890078	Up	AT5G05850	PIRL1	Plant intracellular Ras-group-related LRR protein 1	LOC_Os02g38040	leucine-rich repeat family protein
TraesCS1B02G335800	8.43582	0.000228331	0.00147357	Up				LOC_Os10g04540	expressed protein
TraesCS2A02G189900	8.43448	7.44253e-06	7.46664e-05	Up	AT1G12440	SAP1	Zinc finger A20 and AN1 domain-containing stress-associated protein 1	LOC_Os08g33880	zinc finger A20 and AN1 domain-containing stress-associated protein
TraesCS6B02G056500	8.43426	4.16717e-05	0.000338375	Up	AT5G46050	NPF5.2	Protein NRT1/ PTR FAMILY 5.2	LOC_Os03g04570	peptide transporter PTR3-A
TraesCS4D02G016100	8.43108	6.50257e-07	8.52724e-06	Up	AT3G22640	PAP85	cupin family protein	LOC_Os03g46100	cupin domain containing protein
TraesCS6B02G444900	8.43053	3.12646e-07	4.40214e-06	Up
TraesCS4D02G095800	8.42947	1.16506e-05	0.000110783	Up	AT3G14320	ATL61	Putative RING-H2 finger protein ATL61	LOC_Os02g15120	RING-H2 finger protein
TraesCSU02G140700	8.42812	6.16651e-05	0.000476629	Up	AT5G27740	RFC3	Replication factor C subunit 3	LOC_Os10g42400	expressed protein
TraesCS4A02G260500	8.42459	1.63059e-06	1.94134e-05	Up	AT5G66780		unknown protein%3B Has 1807 Blast hits to 1807 proteins in 277 species: Archae - 0%3B Bacteria - 0%3B Metazoa - 736%3B Fungi - 347%3B Plants - 385%3B Viruses - 0%3B Other Eukaryotes - 339 (source: NCBI BLink).	LOC_Os03g51350	expressed protein
TraesCS3A02G300700	8.42459	1.24653e-07	1.92288e-06	Up	AT1G47710		Serpin-ZX	LOC_Os01g56010	serpin domain containing protein
TraesCS5D02G320800	8.42409	1.18346e-07	1.83366e-06	Up	AT2G47520	ERF071	Ethylene-responsive transcription factor ERF071	LOC_Os01g21120	AP2 domain containing protein
TraesCS5B02G152400	8.42331	0.000509397	0.00293543	Up	AT1G76650	CML38	Calcium-binding protein CML38	LOC_Os11g01390	OsCML25 - Calmodulin-related calcium sensor protein
TraesCS5A02G273400	8.42204	3.69846e-08	6.40026e-07	Up	AT4G31330		Protein of unknown function%2C DUF599	LOC_Os09g32100	expressed protein
TraesCS1D02G429200	8.42136	2.07748e-14	1.06916e-12	Up	AT1G15000	SCPL50	Serine carboxypeptidase-like 50	LOC_Os05g50600	OsSCP31 - Putative Serine Carboxypeptidase homologue
TraesCS2D02G069900	8.42097	6.23688e-05	0.000481088	Up	AT2G16500	SPE1	Arginine decarboxylase 1	LOC_Os04g01690	pyridoxal-dependent decarboxylase protein
TraesCS6A02G295000	8.42079	4.30774e-07	5.88608e-06	Up	AT5G07330		unknown protein%3B FUNCTIONS IN: molecular_function unknown%3B INVOLVED IN: biological_process unknown%3B LOCATED IN: mitochondrion%3B BEST Arabidopsis thaliana protein match is: unknown protein (TAIR:AT1G63060.1)%3B Has 1807 Blast hits to 1807 proteins in 27 /.../ies: Archae - 0%3B Bacteria - 0%3B Metazoa - 736%3B Fungi - 347%3B Plants - 385%3B Viruses - 0%3B Other Eukaryotes - 339 (source: NCBI…	LOC_Os11g32890	expressed protein
TraesCS2B02G338600	8.41895	5.56115e-06	5.75561e-05	Up	AT1G34580	STP5	Sugar transport protein 5	LOC_Os04g38010	transporter family protein
TraesCS5D02G188600	8.41865	1.0068e-10	2.88229e-09	Up	AT2G29380	HAI3	Probable protein phosphatase 2C 24	LOC_Os09g15670	protein phosphatase 2C
TraesCS1D02G239500	8.41768	6.09708e-07	8.04e-06	Up	AT3G53720	CHX20	Cation/H(+) antiporter 20	LOC_Os05g31730	transporter
TraesCS2D02G450600	8.41712	0.006143	0.0236798	Up	AT5G24090	CHIB1	Acidic endochitinase	LOC_Os04g27980	glycosyl hydrolase
TraesCS6D02G137400	8.41405	6.44081e-09	1.30729e-07	Up	AT2G36170	RPL40B	Ubiquitin-60S ribosomal protein L40-1	LOC_Os09g31019	ubiquitin fusion protein
TraesCS4A02G366000	8.40918	1.68385e-28	4.44396e-26	Up	AT4G02340		alpha/beta-Hydrolases superfamily protein	LOC_Os03g61360	hydrolase
TraesCS2D02G396000	8.40635	4.75691e-12	1.71433e-10	Up	AT3G60900	FLA10	Fasciclin-like arabinogalactan protein 10	LOC_Os04g48490	fasciclin-like arabinogalactan protein
TraesCS4D02G284400	8.40618	0.00349445	0.0149474	Up	AT4G25000	AMY1	Alpha-amylase 1	LOC_Os06g49970	alpha-amylase precursor
TraesCS2B02G240800	8.40538	1.87044e-40	1.29356e-37	Up	AT4G23180	CRK10	Cysteine-rich receptor-like protein kinase 10	LOC_Os07g35690	TKL_IRAK_DUF26-lc.3 - DUF26 kinases have homology to DUF26 containing loci
TraesCS1A02G272300	8.4039	1.93688e-08	3.55712e-07	Up	AT5G50080	ERF110	Ethylene-responsive transcription factor ERF110	LOC_Os05g36100	AP2 domain containing protein
TraesCS5A02G477900	8.40077	0.0153945	0.0499356	Up	AT3G53600		C2H2-type zinc finger family protein	LOC_Os03g60560	ZOS3-21 - C2H2 zinc finger protein
TraesCS2D02G096000	8.39054	3.5715e-09	7.60588e-08	Up	AT5G49620	MYB78	myb domain protein 78	LOC_Os07g48870	MYB family transcription factor
TraesCS5B02G478200	8.38738	6.70314e-20	7.15198e-18	Up				LOC_Os01g04040	BBTI11 - Bowman-Birk type bran trypsin inhibitor precursor
TraesCS2A02G467500	8.38011	0.000391492	0.0023405	Up				LOC_Os02g33380	pectinesterase inhibitor domain containing protein
TraesCS6A02G120300	8.36652	2.29663e-10	6.14998e-09	Up	AT2G22800	HAT9	Homeobox-leucine zipper protein HAT9	LOC_Os02g05640	homeobox associated leucine zipper
TraesCS1D02G050000	8.36417	1.0388e-27	2.49602e-25	Up	AT3G22600		Bifunctional inhibitor/lipid-transfer protein/seed storage 2S albumin superfamily protein	LOC_Os07g07930	LTPL78 - Protease inhibitor/seed storage/LTP family protein precursor
TraesCS6D02G222600	8.36295	1.40591e-12	5.55249e-11	Up	AT2G46680	ATHB-7	Homeobox-leucine zipper protein ATHB-7	LOC_Os02g43330	homeobox associated leucine zipper
TraesCS4A02G278900	8.3608	2.44808e-10	6.52083e-09	Up	AT1G18970	GLP1	Germin-like protein subfamily T member 1	LOC_Os03g48750	Cupin domain containing protein
TraesCS7A02G188300	8.35629	1.65683e-22	2.46425e-20	Up	AT5G15250	FTSH6	ATP-dependent zinc metalloprotease FTSH 6%2C chloroplastic	LOC_Os06g12370	OsFtsH6 FtsH protease
TraesCS7A02G023800	8.35452	3.08643e-09	6.64456e-08	Up	AT5G17540		HXXXD-type acyl-transferase family protein	LOC_Os10g35950	transferase family protein
TraesCS3D02G036200	8.35223	3.61165e-08	6.25919e-07	Up	AT1G68320	MYB62	myb domain protein 62	LOC_Os01g03720	MYB family transcription factor
TraesCS6A02G011800	8.34857	1.82181e-06	2.14315e-05	Up	AT1G67710	ARR11	Two-component response regulator ARR11	LOC_Os02g08500	two-component response regulator
TraesCS1B02G193500	8.34189	6.59759e-05	0.000504439	Up
TraesCS2B02G048600	8.34018	2.30887e-08	4.17713e-07	Up	AT5G67150		HXXXD-type acyl-transferase family protein	LOC_Os08g01980	transferase family protein
TraesCS6A02G132700	8.33484	1.45848e-06	1.75726e-05	Up	AT1G15330	PV42A	SNF1-related protein kinase regulatory subunit gamma-like PV42a	LOC_Os02g06410	CBS domain containing membrane protein
TraesCS5A02G343000	8.33242	2.19686e-15	1.31321e-13	Up	AT4G20780	CML42	Calcium-binding protein CML42	LOC_Os05g24780	OsCML21 - Calmodulin-related calcium sensor protein
TraesCS5A02G378300	8.32791	3.66359e-09	7.781e-08	Up	AT3G04730	IAA16	Auxin-responsive protein IAA16	LOC_Os12g40890	OsIAA30 - Auxin-responsive Aux/IAA gene family member
TraesCS3D02G108700	8.32574	4.17727e-06	4.4615e-05	Up	AT4G26200	ACS7	1-aminocyclopropane-1-carboxylate synthase 7	LOC_Os01g09700	aminotransferase
TraesCS1A02G314900	8.31972	2.59798e-09	5.68341e-08	Up	AT3G22840	ELIP1	Early light-induced protein 1%2C chloroplastic	LOC_Os07g08160	early light-induced protein
TraesCS2D02G034800	8.31559	1.40124e-05	0.000130517	Up	AT5G67150		HXXXD-type acyl-transferase family protein	LOC_Os08g02030	transferase family protein
TraesCS5B02G336300	8.31461	1.50565e-08	2.82596e-07	Up	AT5G48930	HST	Shikimate O-hydroxycinnamoyltransferase	LOC_Os09g37180	transferase family protein
TraesCS5B02G419900	8.31282	8.15249e-12	2.82729e-10	Up	AT1G47710		Serpin-ZX	LOC_Os03g41438	serpin domain containing protein
TraesCS7A02G338400	8.30946	0.00138728	0.00688162	Up				LOC_Os10g04380	expressed protein
TraesCS1D02G232700	8.30803	8.43627e-15	4.60959e-13	Up	AT1G02850	BGLU11	Beta-glucosidase 11	LOC_Os01g59819	Os1bglu2 - beta-glucosidase homologue
TraesCS5A02G143900	8.30653	2.52571e-05	0.00021914	Up	AT1G09575		Calcium uniporter protein 6%2C mitochondrial	LOC_Os12g02880	E2F-related protein
TraesCS2D02G100200	8.30397	9.27459e-12	3.185e-10	Up	AT5G17810	WOX12	WUSCHEL-related homeobox 12	LOC_Os07g48560	homeobox domain containing protein
TraesCS5A02G231100	8.30262	6.1765e-05	0.000477248	Up	AT1G55230		Family of unknown function (DUF716)	LOC_Os09g27260	plant viral response family protein
TraesCS5B02G372200	8.29881	1.277e-07	1.96637e-06	Up				LOC_Os11g26790	dehydrin
TraesCS4D02G115200	8.297	1.73512e-10	4.76372e-09	Up	AT1G19490		Basic-leucine zipper (bZIP) transcription factor family protein	LOC_Os11g05640	bZIP transcription factor domain containing protein
TraesCS3B02G254700	8.2945	2.51391e-55	3.60884e-52	Up	AT5G24030	SLAH3	S-type anion channel SLAH3	LOC_Os01g43460	C4-dicarboxylate transporter/malic acid transport protein
TraesCS2B02G088400	8.29377	0.000184902	0.0012256	Up	AT1G05680	UGT74E2	UDP-glycosyltransferase 74E2	LOC_Os04g12980	UDP-glucoronosyl/UDP-glucosyl transferase
TraesCS5D02G310500	8.28894	1.84769e-44	1.53563e-41	Up	AT3G03080		Zinc-binding dehydrogenase family protein	LOC_Os12g12590	NADP-dependent oxidoreductase
TraesCS3D02G472300	8.28427	0.00704486	0.0264471	Up	AT1G34210	SERK2	Somatic embryogenesis receptor kinase 2	LOC_Os11g31540	BRASSINOSTEROID INSENSITIVE 1-associated receptor kinase 1 precursor
TraesCS2B02G121200	8.28113	0.00420412	0.0174131	Up	AT5G20920	EMB1401	Eukaryotic translation initiation factor 2 subunit beta	LOC_Os07g48300	eukaryotic translation initiation factor 2 subunit beta
TraesCS4B02G059200	8.2791	2.77344e-27	6.40909e-25	Up	AT3G07960	PIP5K6	Phosphatidylinositol 4-phosphate 5-kinase 6	LOC_Os07g46490	phosphatidylinositol-4-phosphate 5-kinase
TraesCS7D02G355600	8.27851	4.13593e-11	1.26489e-09	Up	AT3G47570		Probable LRR receptor-like serine/threonine-protein kinase At3g47570	LOC_Os04g15660	receptor kinase
TraesCS3B02G084000	8.27486	0.00209358	0.00974876	Up	AT4G08850		Probable LRR receptor-like serine/threonine-protein kinase At4g08850	LOC_Os02g34790	receptor-like protein kinase 5 precursor
TraesCS5D02G104300	8.27209	1.88727e-05	0.000169377	Up	AT2G47710		Adenine nucleotide alpha hydrolases-like superfamily protein	LOC_Os12g36630	universal stress protein domain containing protein
TraesCS3A02G299400	8.26742	7.91082e-05	0.000590963	Up	AT3G47680		DNA binding	LOC_Os12g07180	transposon protein
TraesCS7D02G457400	8.26721	3.88465e-07	5.34964e-06	Up	AT2G40260		Homeodomain-like superfamily protein	LOC_Os06g45890	MYB family transcription factor
TraesCS1A02G085800	8.26401	4.47812e-06	4.74432e-05	Up	AT1G06650		1-aminocyclopropane-1-carboxylate oxidase homolog 3	LOC_Os03g48430	1-aminocyclopropane-1-carboxylate oxidase homolog 4
TraesCS6B02G330400	8.26197	0.00152639	0.00746654	Up	AT3G22160	VQ22	VQ motif-containing protein 22	LOC_Os02g51740	VQ domain containing protein
TraesCS5D02G129400	8.25931	7.83455e-14	3.71146e-12	Up	AT5G50080	ERF110	Ethylene-responsive transcription factor ERF110	LOC_Os11g06770	ethylene-responsive transcription factor ERF110
TraesCS2A02G319500	8.25722	8.64174e-07	1.09991e-05	Up				LOC_Os04g37880	expressed protein
TraesCS7D02G516200	8.25711	0.000639224	0.00355547	Up	AT2G19590	ACO1	1-aminocyclopropane-1-carboxylate oxidase 1	LOC_Os01g39860	1-aminocyclopropane-1-carboxylate oxidase protein
TraesCS7B02G081800	8.25615	0.000132326	0.000920914	Up	AT1G72230		Cupredoxin superfamily protein	LOC_Os06g11490	plastocyanin-like domain containing protein
TraesCS5D02G310400	8.24967	0.0055752	0.0218692	Up	AT1G50200	ALATS	Alanine--tRNA ligase	LOC_Os10g10244	alanyl-tRNA synthetase
TraesCS7A02G354000	8.24837	3.80795e-20	4.19034e-18	Up	AT4G20860		FAD-binding Berberine family protein	LOC_Os06g35650	reticuline oxidase-like protein precursor
TraesCS2B02G157800	8.24471	0.000709482	0.00388986	Up	AT3G18080	BGLU44	Beta-glucosidase 44	LOC_Os01g32364	Os1bglu1 - beta-mannosidase/glucosidase homologue
TraesCS4D02G247300	8.24413	0.00668789	0.0253633	Up	AT4G35800	NRPB1	DNA-directed RNA polymerase II subunit 1	LOC_Os08g16720	retrotransposon protein
TraesCS3A02G238300	8.24265	1.06303e-07	1.66338e-06	Up	AT5G53290	CRF3	Ethylene-responsive transcription factor CRF3	LOC_Os01g46870	AP2 domain containing protein
TraesCS5A02G525300	8.23361	4.54768e-05	0.000365395	Up	AT1G76690	OPR2	12-oxophytodienoate reductase 2	LOC_Os06g11290	12-oxophytodienoate reductase
TraesCS7A02G230200	8.22046	2.61471e-08	4.66804e-07	Up	AT5G52450		MATE efflux family protein	LOC_Os06g29994	MATE efflux family protein
TraesCS3D02G288600	8.21576	3.71768e-86	3.91373e-82	Up	AT5G19600	SULTR3%3B5	Probable sulfate transporter 3.5	LOC_Os01g52130	sulfate transporter
TraesCS4D02G014700	8.21251	9.83459e-09	1.9228e-07	Up	AT1G16520		unknown protein%3B FUNCTIONS IN: molecular_function unknown%3B INVOLVED IN: biological_process unknown%3B LOCATED IN: plasma membrane%3B EXPRESSED IN: 22 plant structures%3B EXPRESSED DURING: 13 growth stages%3B BEST Arabidopsis thaliana protein match is: unkno /.../tein (TAIR:AT1G56080.1)%3B Has 243 Blast hits to 234 proteins in 69 species: Archae - 2%3B Bacteria - 2%3B Metazoa - 61%3B Fungi - 9…	LOC_Os03g45760	expressed protein
TraesCS7B02G252600	8.20481	0.00154897	0.00756101	Up	AT5G17000		Zinc-binding dehydrogenase family protein	LOC_Os06g40070	NADP-dependent oxidoreductase
TraesCS4B02G107000	8.19896	7.2182e-08	1.17387e-06	Up	AT5G42510	DIR1	Dirigent protein 1	LOC_Os11g10850	dirigent
TraesCS3B02G384800	8.19579	2.18734e-16	1.51271e-14	Up	AT3G07990	SCPL27	Serine carboxypeptidase-like 27	LOC_Os01g61690	OsSCP5 - Putative Serine Carboxypeptidase homologue
TraesCS5D02G228500	8.18948	1.76558e-57	3.04148e-54	Up	AT4G28040		WAT1-related protein At4g28040	LOC_Os09g25770	auxin-induced protein 5NG4
TraesCS2A02G571500	8.18934	5.19415e-07	6.96075e-06	Up	AT1G71695	PER12	Peroxidase 12	LOC_Os04g59260	peroxidase precursor
TraesCS1B02G103700	8.1892	8.55405e-09	1.6934e-07	Up	AT2G30840		2-oxoglutarate (2OG) and Fe(II)-dependent oxygenase superfamily protein	LOC_Os03g48430	1-aminocyclopropane-1-carboxylate oxidase homolog 4
TraesCS5B02G336200	8.18273	5.7529e-07	7.62862e-06	Up	AT3G14390	LYSA1	Diaminopimelate decarboxylase 1%2C chloroplastic	LOC_Os09g37120	pyridoxal-dependent decarboxylase protein
TraesCS6B02G074200	8.18112	1.81179e-05	0.000163423	Up	AT3G09220	LAC7	Laccase-7	LOC_Os10g20610	laccase-15 precursor
TraesCS3B02G440500	8.18063	4.21877e-26	8.63307e-24	Up	AT4G25300		2-oxoglutarate (2OG) and Fe(II)-dependent oxygenase superfamily protein	LOC_Os03g63900	1-aminocyclopropane-1-carboxylate oxidase 2
TraesCS1D02G429300	8.18051	2.73223e-12	1.02971e-10	Up				LOC_Os03g47420	OsFBX107 - F-box domain containing protein
TraesCS1B02G292800	8.1727	3.32551e-07	4.65061e-06	Up	AT2G28660		Chloroplast-targeted copper chaperone protein	LOC_Os08g31340	heavy metal-associated domain containing protein
TraesCS3A02G237800	8.16373	1.02942e-31	3.66667e-29	Up	AT2G29380	HAI3	Probable protein phosphatase 2C 24	LOC_Os01g46760	protein phosphatase 2C
TraesCS3D02G256000	8.16181	9.07367e-11	2.62022e-09	Up	AT4G36470		S-adenosyl-L-methionine-dependent methyltransferases superfamily protein	LOC_Os01g50610	SAM dependent carboxyl methyltransferase
TraesCS2D02G409500	8.15881	4.94657e-35	2.30871e-32	Up	AT5G09640	SCPL19	Serine carboxypeptidase-like 19	LOC_Os11g24510	OsSCP56 - Putative Serine Carboxypeptidase homologue
TraesCS7D02G065400	8.15784	2.16717e-05	0.00019145	Up	AT1G32860		Glucan endo-1%2C3-beta-glucosidase 11	LOC_Os06g04080	glycosyl hydrolases family 17
TraesCS2B02G267400	8.15548	0.00504464	0.0201484	Up	AT2G31160	LSH3	Protein LIGHT-DEPENDENT SHORT HYPOCOTYLS 3	LOC_Os07g04670	DUF640 domain containing protein
TraesCS3D02G467300	8.15496	6.00482e-24	1.03067e-21	Up	AT1G03230		Eukaryotic aspartyl protease family protein	LOC_Os01g71090	xylanase inhibitor
TraesCS3B02G128600	8.15447	3.51398e-07	4.88892e-06	Up				LOC_Os12g03400	expressed protein
TraesCS4B02G107600	8.15099	1.47134e-08	2.76815e-07	Up
TraesCS6B02G280800	8.15065	1.13202e-05	0.000108087	Up	AT5G47230	ERF5	Ethylene-responsive transcription factor 5	LOC_Os02g43820	AP2 domain containing protein
TraesCS4D02G068800	8.14719	1.07342e-09	2.52677e-08	Up	AT1G12950	RSH2	root hair specific 2	LOC_Os03g42830	MATE efflux family protein
TraesCS5A02G303400	8.14571	1.7547e-10	4.8105e-09	Up	AT3G03080		Zinc-binding dehydrogenase family protein	LOC_Os12g12590	NADP-dependent oxidoreductase
TraesCS4D02G209400	8.14125	3.91388e-08	6.7484e-07	Up	AT2G39710		Eukaryotic aspartyl protease family protein	LOC_Os03g16500	aspartic proteinase nepenthesin precursor
TraesCS7B02G265800	8.13866	3.65624e-10	9.4032e-09	Up	AT5G25900	KO	Ent-kaurene oxidase%2C chloroplastic	LOC_Os06g37330	cytochrome P450
TraesCS4B02G181900	8.13855	9.05804e-07	1.14719e-05	Up				LOC_Os03g19550	retrotransposon protein
TraesCS7D02G314200	8.13436	0.0119104	0.0406155	Up	AT2G46750	GULLO2	L-gulonolactone oxidase 2	LOC_Os08g02230	FAD-binding and arabino-lactone oxidase domains containing protein
TraesCS1B02G277600	8.13025	7.69247e-06	7.68403e-05	Up	AT1G09812		unknown protein%3B BEST Arabidopsis thaliana protein match is: unknown protein (TAIR:AT1G58007.2)%3B Has 93 Blast hits to 93 proteins in 13 species: Archae - 0%3B Bacteria - 0%3B Metazoa - 0%3B Fungi - 0%3B Plants - 93%3B Viruses - 0%3B Other Eukaryotes - 0 (source /.../ BLink).	LOC_Os05g35230	expressed protein
TraesCS6D02G333100	8.12889	2.83202e-06	3.16903e-05	Up
TraesCS5B02G361600	8.12022	0.000415624	0.00246333	Up	AT2G46260		BTB/POZ domain-containing protein At2g46260	LOC_Os02g16000	E1-BTB1 - Bric-a-Brac
TraesCS5D02G227700	8.12019	1.52054e-07	2.30062e-06	Up	AT3G22840	ELIP1	Early light-induced protein 1%2C chloroplastic	LOC_Os07g08160	early light-induced protein
TraesCS2D02G461100	8.11961	8.94861e-08	1.42519e-06	Up
TraesCS3B02G549500	8.1189	2.91095e-06	3.24858e-05	Up	AT5G12340		unknown protein%3B BEST Arabidopsis thaliana protein match is: unknown protein (TAIR:AT1G28190.1)%3B Has 30201 Blast hits to 17322 proteins in 780 species: Archae - 12%3B Bacteria - 1396%3B Metazoa - 17338%3B Fungi - 3422%3B Plants - 5037%3B Viruses - 0%3B Other Eu /.../es - 2996 (source: NCBI BLink).	LOC_Os01g72360	expressed protein
TraesCS6D02G260500	8.11857	1.73929e-27	4.07899e-25	Up	AT1G32450	NPF7.3	Protein NRT1/ PTR FAMILY 7.3	LOC_Os02g48570	peptide transporter PTR2
TraesCS7D02G322400	8.11788	5.76111e-10	1.43454e-08	Up	AT3G12960		unknown protein%3B Has 44 Blast hits to 44 proteins in 14 species: Archae - 0%3B Bacteria - 0%3B Metazoa - 0%3B Fungi - 0%3B Plants - 44%3B Viruses - 0%3B Other Eukaryotes - 0 (source: NCBI BLink).	LOC_Os08g01370	expressed protein
TraesCS7B02G437800	8.11561	0.000229555	0.00148033	Up	AT1G13080	CYP71B2	Cytochrome P450 71B2	LOC_Os02g17760	cytochrome P450
TraesCS6B02G143900	8.10367	2.6324e-11	8.32751e-10	Up	AT5G22610		F-box/RNI-like/FBD-like domains-containing protein	LOC_Os02g57860	OsFBX71 - F-box domain containing protein
TraesCS7B02G408300	8.10219	5.73686e-08	9.55766e-07	Up	AT1G54690	HTA3	Probable histone H2AXb	LOC_Os12g34510	Core histone H2A/H2B/H3/H4 domain containing protein
TraesCS4A02G119900	8.10119	8.93752e-06	8.76508e-05	Up	AT4G16160	OEP162	Outer envelope pore protein 16-2%2C chloroplastic	LOC_Os03g19290	mitochondrial import inner membrane translocase subunit Tim17
TraesCS7D02G441700	8.10063	1.54728e-07	2.33512e-06	Up	AT1G13520		Protein of unknown function (DUF1262)	LOC_Os08g31880	expressed protein
TraesCS7D02G436200	8.09736	6.53956e-05	0.000500442	Up	AT5G45540		Protein of unknown function (DUF594)	LOC_Os05g46690	expressed protein
TraesCS1D02G045500	8.09654	2.00894e-08	3.67834e-07	Up	AT3G57230	AGL16	Agamous-like MADS-box protein AGL16	LOC_Os02g36924	OsMADS27 - MADS-box family gene with MIKCc type-box
TraesCS1D02G098200	8.09504	1.5234e-06	1.82815e-05	Up	AT1G17070	STIPL1	Septin and tuftelin-interacting protein 1 homolog 1	LOC_Os12g42140	G-patch domain containing protein
TraesCSU02G027400	8.09328	0.000315642	0.00194738	Up				LOC_Os03g46510	OsFBX103 - F-box domain containing protein
TraesCSU02G003900	8.09117	2.67152e-10	7.04469e-09	Up	AT1G15150		MATE efflux family protein	LOC_Os05g48040	MATE efflux family protein
TraesCS5A02G472600	8.08992	2.41338e-21	3.11948e-19	Up	AT3G11900	ANT1	Amino acid transporter ANT1	LOC_Os03g60260	ANT1
TraesCS7A02G200500	8.08543	7.01775e-07	9.12202e-06	Up	AT3G62120		Class II aaRS and biotin synthetases superfamily protein	LOC_Os12g25710	bifunctional aminoacyl-tRNA synthetase
TraesCSU02G080500	8.08331	1.7583e-09	3.96647e-08	Up	AT2G33510		CONTAINS InterPro DOMAIN/s: WW/Rsp5/WWP (InterPro:IPR001202)%3B BEST Arabidopsis thaliana protein match is: unknown protein (TAIR:AT1G28070.1)%3B Has 3898 Blast hits to 1138 proteins in 179 species: Archae - 0%3B Bacteria - 40%3B Metazoa - 2353%3B Fungi - 242 /.../ts - 298%3B Viruses - 92%3B Other Eukaryotes - 873 (source: NCBI BLink).	LOC_Os02g31140	major ampullate spidroin 2-2
TraesCS1B02G311300	8.07846	0.000445748	0.00261841	Up	AT5G01920	STN8	Serine/threonine-protein kinase STN8%2C chloroplastic	LOC_Os05g40180	serine/threonine-protein kinase stt7
TraesCS2B02G041700	8.06832	4.02289e-06	4.31266e-05	Up	AT1G22400	UGT85A1	UDP-glycosyltransferase 85A1	LOC_Os02g36830	cytokinin-O-glucosyltransferase 2
TraesCS7D02G363100	8.06528	0.000381447	0.00228926	Up	AT1G26560	BGLU40	Beta-glucosidase 40	LOC_Os10g17650	Os10bglu34 - beta-glucosidase homologue
TraesCS7B02G400500	8.06061	7.81989e-08	1.26176e-06	Up	AT5G52450		MATE efflux family protein	LOC_Os10g20450	MATE efflux family protein
TraesCS7A02G309600	8.05611	7.40871e-13	3.04664e-11	Up	AT5G03555	NCS1	Purine-uracil permease NCS1	LOC_Os02g44680	allantoin permease
TraesCS7A02G227900	8.05567	6.8537e-06	6.94355e-05	Up
TraesCS4B02G204800	8.04454	0.000164424	0.00110816	Up	AT2G36660	PAB7	Polyadenylate-binding protein 7	LOC_Os03g17030	polyadenylate-binding protein
TraesCS4D02G262800	8.04433	5.39514e-07	7.20259e-06	Up	AT2G18540		RmlC-like cupins superfamily protein	LOC_Os03g10110	cupin domain containing protein
TraesCS4D02G030800	8.04268	4.33168e-07	5.91454e-06	Up	AT1G18980		Germin-like protein subfamily T member 2	LOC_Os03g48770	Cupin domain containing protein
TraesCS5A02G241200	8.03725	0.00161505	0.00783268	Up	AT1G49640	CXE3	Probable carboxylesterase 3	LOC_Os09g28620	gibberellin receptor GID1L2
TraesCS3D02G238000	8.03434	4.05277e-36	2.03166e-33	Up	AT1G07430	AIP1	Protein phosphatase 2C 3	LOC_Os01g46760	protein phosphatase 2C
TraesCS4A02G128300	8.03044	9.94798e-10	2.36342e-08	Up	AT1G48175	emb2191	Cytidine/deoxycytidylate deaminase family protein	LOC_Os03g20570	tRNA-specific adenosine deaminase 2
TraesCS3B02G404000	8.02801	2.44481e-05	0.00021294	Up	AT3G20880	WIP4	Zinc finger protein WIP4	LOC_Os01g63980	ZOS1-17 - C2H2 zinc finger protein
TraesCS1A02G165400	8.02777	6.76475e-07	8.8295e-06	Up	AT1G73190	TIP3-1	Aquaporin TIP3-1	LOC_Os10g35050	aquaporin protein
TraesCS2D02G031200	8.02646	0.00217567	0.0100726	Up	AT1G01690	ATPRD3	putative recombination initiation defects 3	LOC_Os03g01590	PAIR1
TraesCS1B02G423100	8.02387	0.00676365	0.0255799	Up
TraesCS2A02G186000	8.02228	6.14686e-06	6.29816e-05	Up				LOC_Os01g51500	expressed protein
TraesCS6D02G062200	8.01455	2.02054e-05	0.00017994	Up	AT4G13420	POT5	Potassium transporter 5	LOC_Os02g31910	potassium transporter
TraesCS2D02G008400	8.00917	6.95346e-07	9.04963e-06	Up	AT1G07900	LBD1	LOB domain-containing protein 1	LOC_Os03g17810	DUF260 domain containing protein
TraesCS7D02G156900	8.00801	2.35554e-07	3.41356e-06	Up	AT5G11880	LYSA2	Diaminopimelate decarboxylase 2%2C chloroplastic	LOC_Os09g37120	pyridoxal-dependent decarboxylase protein
TraesCS4D02G303100	8.00729	0.000175088	0.00116909	Up
TraesCS2B02G519700	8.0065	3.00395e-07	4.24858e-06	Up				LOC_Os09g04310	expressed protein
TraesCS1D02G293000	8.00328	6.05375e-24	1.03719e-21	Up	AT5G01670		NAD(P)-linked oxidoreductase superfamily protein	LOC_Os05g39690	oxidoreductase
TraesCS5B02G241900	7.99848	1.03297e-08	2.00882e-07	Up	AT1G05510		Protein of unknown function (DUF1264)	LOC_Os05g49440	DUF1264 domain containing protein
TraesCSU02G027200	7.99572	6.12143e-05	0.000473696	Up	AT5G07610		F-box protein At5g07610	LOC_Os03g46510	OsFBX103 - F-box domain containing protein
TraesCS3D02G178200	7.99534	6.37924e-05	0.000490193	Up	AT3G51550	FER	Receptor-like protein kinase FERONIA	LOC_Os01g56330	TKL_IRAK_CrRLK1L-1.5 - The CrRLK1L-1 subfamily has homology to the CrRLK1L homolog
TraesCS6A02G301100	7.99463	3.95843e-08	6.81652e-07	Up				LOC_Os02g51740	VQ domain containing protein
TraesCS4A02G186700	7.99001	7.37369e-24	1.25202e-21	Up	AT4G00340	RLK4	receptor-like protein kinase 4	LOC_Os06g37670	S-locus-like receptor protein kinase
TraesCS4B02G276100	7.9713	2.73495e-05	0.000234439	Up	AT3G22530		unknown protein%3B FUNCTIONS IN: molecular_function unknown%3B INVOLVED IN: biological_process unknown%3B LOCATED IN: plasma membrane%3B EXPRESSED IN: 25 plant structures%3B EXPRESSED DURING: 15 growth stages%3B BEST Arabidopsis thaliana protein match is: unkno /.../tein (TAIR:AT4G14830.1)%3B Has 77 Blast hits to 77 proteins in 12 species: Archae - 0%3B Bacteria - 0%3B Metazoa - 0%3B Fungi - 0%3B…	LOC_Os03g06390	expressed protein
TraesCS1A02G243500	7.96833	7.84102e-08	1.26473e-06	Up	AT2G30550		Phospholipase A1-Igamma2%2C chloroplastic	LOC_Os05g32380	phospholipase
TraesCS7D02G109300	7.96698	0.000188342	0.00124501	Up	AT5G46030		Transcription elongation factor 1 homolog	LOC_Os02g04160	transcription elongation factor 1
TraesCS2D02G014200	7.96005	1.41806e-09	3.25868e-08	Up	AT3G30180	CYP85A2	Cytochrome P450 85A2	LOC_Os03g40540	cytochrome P450
TraesCS7D02G408500	7.95579	4.88678e-07	6.58891e-06	Up	AT3G13000		Protein of unknown function%2C DUF547	LOC_Os06g49060	ternary complex factor MIP1
TraesCS2D02G189100	7.95418	0.000850125	0.00454326	Up	AT3G19580	AZF2	Zinc finger protein AZF2	LOC_Os07g40780	ZOS7-11 - C2H2 zinc finger protein
TraesCS3B02G328500	7.94836	9.19513e-05	0.000673315	Up				LOC_Os01g55160	expressed protein
TraesCS7B02G306700	7.94812	0.000318827	0.00196383	Up
TraesCS6D02G284200	7.94749	1.14995e-16	8.30439e-15	Up	AT5G09360	LAC14	Laccase-14	LOC_Os02g51440	laccase precursor protein
TraesCS7A02G276600	7.94667	7.761e-23	1.19177e-20	Up	AT5G57880	MPS1	multipolar spindle 1	LOC_Os08g44180	expressed protein
TraesCS5D02G519200	7.94315	3.25867e-05	0.00027359	Up	AT5G67150		HXXXD-type acyl-transferase family protein	LOC_Os08g01980	transferase family protein
TraesCS2B02G383500	7.94197	1.76707e-10	4.84128e-09	Up	AT4G13510	AMT1-1	Ammonium transporter 1 member 1	LOC_Os04g43070	ammonium transporter protein
TraesCS2A02G291400	7.94124	2.05109e-08	3.74798e-07	Up	AT3G06868		unknown protein%3B FUNCTIONS IN: molecular_function unknown%3B INVOLVED IN: biological_process unknown%3B LOCATED IN: cellular_component unknown%3B BEST Arabidopsis thaliana protein match is: unknown protein (TAIR:AT5G49100.1)%3B Has 30201 Blast hits to 17322 /.../ins in 780 species: Archae - 12%3B Bacteria - 1396%3B Metazoa - 17338%3B Fungi - 3422%3B Plants - 5037%3B Viruses - 0%3B Other Eukaryo…	LOC_Os04g33260	expressed protein
TraesCS4B02G339800	7.93208	1.09016e-52	1.39579e-49	Up	AT1G19450		Sugar transporter ERD6-like 4	LOC_Os05g49270	transporter family protein
TraesCS5B02G293800	7.93158	4.66889e-08	7.9148e-07	Up				LOC_Os09g33650	expressed protein
TraesCS3B02G316100	7.92852	7.52084e-08	1.2189e-06	Up	AT1G71950		Proteinase inhibitor%2C propeptide	LOC_Os01g52960	subtilisin N-terminal Region family protein
TraesCS4B02G323300	7.92839	5.55531e-07	7.39974e-06	Up	AT3G13540	MYB5	Transcription repressor MYB5	LOC_Os06g10350	MYB family transcription factor
TraesCS4D02G282900	7.92795	0.00524292	0.0208017	Up	AT3G20250	APUM5	Pumilio homolog 5	LOC_Os03g09300	pumilio-family RNA binding repeat containing protein
TraesCS2B02G031900	7.92754	0.000262213	0.00166045	Up	AT2G22330	CYP79B3	Tryptophan N-monooxygenase 2	LOC_Os04g08828	cytochrome P450
TraesCS5B02G041500	7.92488	3.51625e-07	4.89136e-06	Up	AT2G40475		unknown protein%3B BEST Arabidopsis thaliana protein match is: unknown protein (TAIR:AT3G56260.2)%3B Has 477 Blast hits to 219 proteins in 41 species: Archae - 0%3B Bacteria - 4%3B Metazoa - 91%3B Fungi - 61%3B Plants - 144%3B Viruses - 0%3B Other Eukaryotes - 177 /.../e: NCBI BLink).	LOC_Os07g12720	expressed protein
TraesCS4A02G445500	7.92431	2.45886e-06	2.79773e-05	Up	AT1G35710		Probable leucine-rich repeat receptor-like protein kinase At1g35710	LOC_Os02g34790	receptor-like protein kinase 5 precursor
TraesCS2B02G521800	7.92376	6.07527e-65	2.30243e-61	Up	AT1G78290	SRK2C	Serine/threonine-protein kinase SRK2C	LOC_Os03g27280	CAMK_CAMK_like.19 - CAMK includes calcium/calmodulin depedent protein kinases
TraesCS3A02G255100	7.92286	2.17522e-07	3.18537e-06	Up	AT4G36470		S-adenosyl-L-methionine-dependent methyltransferases superfamily protein	LOC_Os01g50610	SAM dependent carboxyl methyltransferase
TraesCS2B02G622400	7.91838	0.000145073	0.000996453	Up	AT3G12500	CHI-B	Basic endochitinase B	LOC_Os05g33140	CHIT5 - Chitinase family protein precursor
TraesCS5A02G325100	7.91746	0.000412593	0.00244873	Up				LOC_Os01g71430	OsFBDUF9 - F-box and DUF domain containing protein
TraesCS7B02G147900	7.91177	2.83881e-08	5.02646e-07	Up				LOC_Os09g01790	expressed protein
TraesCS3B02G547800	7.91108	0.00332144	0.014329	Up	AT3G14470	RPPL1	Putative disease resistance RPP13-like protein 1	LOC_Os01g25740	powdery mildew resistance protein PM3F
TraesCS2B02G333500	7.9091	3.36457e-07	4.70176e-06	Up	AT1G01690	ATPRD3	putative recombination initiation defects 3	LOC_Os03g01590	PAIR1
TraesCS4B02G397600	7.90725	1.08799e-09	2.55916e-08	Up	AT5G09590	HSP70-10	Heat shock 70 kDa protein 10%2C mitochondrial	LOC_Os02g53420	DnaK family protein
TraesCS3A02G371700	7.90394	0.000545796	0.00311031	Up	AT3G20880	WIP4	Zinc finger protein WIP4	LOC_Os01g63980	ZOS1-17 - C2H2 zinc finger protein
TraesCS4B02G235000	7.89807	2.97774e-63	1.0076e-59	Up	AT1G32230	RCD1	Inactive poly	LOC_Os03g12820	ATP8
TraesCS7D02G013800	7.89714	0.000470008	0.00274292	Up
TraesCS5A02G386700	7.89467	3.43369e-07	4.78635e-06	Up	AT3G03980		NAD(P)-binding Rossmann-fold superfamily protein	LOC_Os03g53690	oxidoreductase
TraesCS7D02G056500	7.89072	0.000118119	0.000835982	Up
TraesCS1D02G265800	7.88299	1.51163e-31	5.3242e-29	Up				LOC_Os01g04050	BBTI12 - Bowman-Birk type bran trypsin inhibitor precursor
TraesCS6B02G419200	7.88232	0.0046083	0.0187656	Up	AT3G14470	RPPL1	Putative disease resistance RPP13-like protein 1	LOC_Os06g47800	disease resistance protein RGA3
TraesCS3A02G044700	7.88054	2.583e-05	0.000223599	Up	AT1G68320	MYB62	myb domain protein 62	LOC_Os01g03720	MYB family transcription factor
TraesCS1D02G238100	7.87948	4.99686e-06	5.23362e-05	Up	AT4G24670	TAR2	Tryptophan aminotransferase-related protein 2	LOC_Os01g07500	alliin lyase precursor
TraesCS4B02G191100	7.87617	0.000130441	0.000909134	Up				LOC_Os03g18490	RPGR
TraesCS3B02G266200	7.87221	2.80117e-39	1.72338e-36	Up	AT5G59220	HAI1	Probable protein phosphatase 2C 78	LOC_Os01g46760	protein phosphatase 2C
TraesCS4B02G070000	7.86922	3.40768e-14	1.70467e-12	Up	AT1G12950	RSH2	root hair specific 2	LOC_Os03g42830	MATE efflux family protein
TraesCS2D02G506900	7.86849	0.00116252	0.00592682	Up	AT5G57420	IAA33	Auxin-responsive protein IAA33	LOC_Os04g55950	expressed protein
TraesCS2B02G102800	7.85914	1.8868e-07	2.8033e-06	Up	AT1G32100	PRR1	Pinoresinol reductase 1	LOC_Os12g16410	isoflavone reductase
TraesCS5A02G332600	7.85277	0.00225847	0.0103864	Up
TraesCS6A02G112000	7.85134	0.00065253	0.00361844	Up	AT5G20730	ARF7	Auxin response factor 7	LOC_Os02g04810	auxin response factor 5
TraesCS6A02G076800	7.85004	1.19259e-05	0.00011314	Up	AT2G02100	PDF2.2	Defensin-like protein 2	LOC_Os02g41904	DEF7 - Defensin and Defensin-like DEFL family
TraesCS3B02G549200	7.84658	9.47003e-19	9.07227e-17	Up	AT3G01420	DOX1	Alpha-dioxygenase 1	LOC_Os12g26290	alpha-DOX2
TraesCS3D02G216700	7.84433	4.24156e-08	7.26448e-07	Up	AT1G01300		Eukaryotic aspartyl protease family protein	LOC_Os01g41550	aspartic proteinase
TraesCS3A02G061600	7.8414	8.80052e-05	0.000647824	Up	AT2G30770	CYP71A13	cytochrome P450%2C family 71%2C subfamily A%2C polypeptide 13	LOC_Os08g01510	cytochrome P450
TraesCS5A02G500100	7.84073	1.60867e-09	3.65767e-08	Up	AT5G10530	LECRK91	L-type lectin-domain containing receptor kinase IX.1	LOC_Os12g41490	cysteine-rich receptor-like protein kinase 8 precursor
TraesCS2B02G454600	7.83584	1.50727e-05	0.000139162	Up	AT3G23730	XTH16	Probable xyloglucan endotransglucosylase/hydrolase protein 16	LOC_Os04g51510	glycosyl hydrolases family 16
TraesCS2B02G241800	7.83561	8.78552e-08	1.40204e-06	Up	AT4G23160	CRK8	cysteine-rich RLK (RECEPTOR-like protein kinase) 8	LOC_Os07g35680	TKL_IRAK_DUF26-lc22 - DUF26 kinases have homology to DUF26 containing loci
TraesCS7A02G369900	7.83434	2.36281e-05	0.0002065	Up	AT2G16050		Cysteine/Histidine-rich C1 domain family protein	LOC_Os08g31280	DC1
TraesCS6B02G314200	7.83153	1.00035e-07	1.5744e-06	Up	AT5G23810	AAP7	Probable amino acid permease 7	LOC_Os02g49060	amino acid transporter
TraesCS5B02G131900	7.82869	8.77235e-06	8.62363e-05	Up	AT3G22880	DMC1	Meiotic recombination protein DMC1 homolog	LOC_Os11g04954	DNA repair protein Rad51
TraesCS2D02G018100	7.82867	3.10522e-06	3.43379e-05	Up				LOC_Os10g04540	expressed protein
TraesCS3B02G389400	7.82349	3.89277e-27	8.86597e-25	Up	AT2G28710		C2H2-type zinc finger family protein	LOC_Os01g62190	ZOS1-15 - C2H2 zinc finger protein
TraesCS3D02G158600	7.82321	7.32793e-37	3.81479e-34	Up	AT1G01470	LEA14	Probable desiccation-related protein LEA14	LOC_Os01g12580	late embryogenesis abundant protein
TraesCS2A02G010300	7.82166	2.25e-07	3.28321e-06	Up	AT4G08850		Probable LRR receptor-like serine/threonine-protein kinase At4g08850	LOC_Os02g34790	receptor-like protein kinase 5 precursor
TraesCS7D02G211700	7.82145	3.35114e-41	2.36945e-38	Up	AT4G28390	AAC3	ADP%2CATP carrier protein 3%2C mitochondrial	LOC_Os05g23720	mitochondrial carrier protein
TraesCS2D02G166200	7.82102	1.11363e-05	0.000106567	Up				LOC_Os07g43440	expressed protein
TraesCS3B02G308100	7.82075	1.23865e-06	1.5184e-05	Up	AT1G74310	CLPB1	Chaperone protein ClpB1	LOC_Os05g44340	heat shock protein 101
TraesCS3A02G217900	7.82048	8.38688e-25	1.55808e-22	Up	AT1G15520	ABCG40	ABC transporter G family member 40	LOC_Os12g32820	pleiotropic drug resistance protein 3
TraesCS3D02G296200	7.80828	2.83664e-08	5.02469e-07	Up	AT5G62890	NAT6	Nucleobase-ascorbate transporter 6	LOC_Os12g39420	nucleobase-ascorbate transporter
TraesCS7A02G196500	7.80714	1.72499e-07	2.58479e-06	Up	AT3G02610	S-ACP-DES2	Plant stearoyl-acyl-carrier-protein desaturase family protein	LOC_Os08g10010	acyl-desaturase
TraesCS3B02G581800	7.80598	0.000410477	0.00243877	Up	AT2G40030	NRPE1	DNA-directed RNA polymerase V subunit 1	LOC_Os01g73430	RNA polymerase IV largest subunit
TraesCS3D02G447800	7.79722	1.11931e-05	0.000107035	Up	AT2G23610	MES3	Methylesterase 3	LOC_Os01g70860	esterase
TraesCS3D02G218900	7.79064	3.63113e-07	5.03344e-06	Up
TraesCS2A02G370900	7.79051	0.00555111	0.021799	Up	AT3G61220	SDR1	(+)-neomenthol dehydrogenase	LOC_Os02g42810	oxidoreductase
TraesCS5B02G394600	7.79015	0.00122885	0.00621582	Up	AT3G11930		Adenine nucleotide alpha hydrolases-like superfamily protein	LOC_Os03g53900	universal stress protein domain containing protein
TraesCS6B02G123500	7.78967	1.11237e-05	0.000106468	Up	AT4G40070	ATL32	RING-H2 finger protein ATL32	LOC_Os02g15060	zinc finger
TraesCS2D02G505700	7.78796	0.01066	0.037094	Up	AT1G22710	SUC2	Sucrose transport protein SUC2	LOC_Os02g36700	sucrose transporter BoSUT1
TraesCS3D02G138700	7.78366	7.22119e-06	7.27463e-05	Up	AT4G35160		O-methyltransferase family protein	LOC_Os08g19420	O-methyltransferase
TraesCS6D02G366400	7.78357	5.03823e-07	6.77e-06	Up	AT1G15950	CCR1	Cinnamoyl-CoA reductase 1	LOC_Os02g56680	dehydrogenase
TraesCS3A02G363600	7.78152	2.0954e-05	0.000185838	Up	AT5G02040	PRA1A1	PRA1 family protein A1	LOC_Os01g62890	prenylated rab acceptor
TraesCS5B02G304700	7.77809	0.000345272	0.00210347	Up
TraesCS3D02G164600	7.77564	9.94461e-09	1.9419e-07	Up	AT1G44110	CYCA1-1	Cyclin-A1-1	LOC_Os01g13260	cyclin-A1
TraesCS6D02G225700	7.7749	3.96473e-05	0.000324025	Up	AT5G47230	ERF5	Ethylene-responsive transcription factor 5	LOC_Os02g43820	AP2 domain containing protein
TraesCS3D02G534800	7.77459	0.00958298	0.0340056	Up	AT3G16520	UGT88A1	UDP-glycosyltransferase 88A1	LOC_Os01g53350	anthocyanidin 5
TraesCS6A02G321100	7.77256	6.12798e-08	1.01215e-06	Up	AT3G10190	CML36	Probable calcium-binding protein CML36	LOC_Os02g52540	EF hand family protein
TraesCS5B02G519100	7.76716	1.40168e-05	0.000130545	Up	AT5G37380		Chaperone DnaJ-domain superfamily protein	LOC_Os03g62150	heat shock protein DnaJ
TraesCS2D02G105100	7.76643	0.000250226	0.00159499	Up	AT2G14740	VSR3	Vacuolar-sorting receptor 3	LOC_Os07g48229	vacuolar-sorting receptor precursor
TraesCSU02G140800	7.76481	1.55572e-05	0.000142967	Up				LOC_Os02g40590	expressed protein
TraesCS5A02G185300	7.76458	0.000936218	0.00492986	Up	AT3G21360		Clavaminate synthase-like protein At3g21360	LOC_Os08g29510	expressed protein
TraesCS4A02G015500	7.76265	5.14691e-07	6.90624e-06	Up				LOC_Os03g07590	expressed protein
TraesCS7D02G159700	7.76115	1.42856e-05	0.000132787	Up	AT5G42430		Putative F-box protein At5g42430	LOC_Os07g35050	OsFBX237 - F-box domain containing protein
TraesCS1B02G100400	7.76045	0.000377792	0.00227028	Up	AT1G09530	PIF3	Transcription factor PIF3	LOC_Os05g04740	helix-loop-helix DNA-binding domain containing protein
TraesCS1B02G376700	7.75759	6.16906e-05	0.000476787	Up	AT1G09200	HTR2	Histone H3.2	LOC_Os01g64640	histone H3
TraesCS4A02G059800	7.75376	4.79103e-06	5.04088e-05	Up	AT3G49680	BCAT3	Branched-chain-amino-acid aminotransferase 3%2C chloroplastic	LOC_Os03g12890	aminotransferase domain containing protein
TraesCS2B02G537700	7.75087	0.000602984	0.00338149	Up	AT5G05340	PER52	Peroxidase 52	LOC_Os04g55740	peroxidase precursor
TraesCS7B02G270000	7.74805	6.32151e-09	1.28555e-07	Up	AT1G29670		GDSL esterase/lipase At1g29670	LOC_Os06g36520	GDSL-like lipase/acylhydrolase
TraesCS5A02G191700	7.74423	2.22134e-18	2.0493e-16	Up				LOC_Os09g19970	expressed protein
TraesCS3A02G039400	7.74363	1.90821e-05	0.00017103	Up	AT4G23180	CRK10	Cysteine-rich receptor-like protein kinase 10	LOC_Os10g04730	TKL_IRAK_DUF26-la.6 - DUF26 kinases have homology to DUF26 containing loci
TraesCS6B02G290500	7.73806	2.03613e-05	0.000181175	Up	AT4G21680	NPF7.2	Protein NRT1/ PTR FAMILY 7.2	LOC_Os02g46460	peptide transporter PTR2
TraesCS2A02G106900	7.73302	2.37973e-18	2.18267e-16	Up	AT3G48140	T24C20_20	B12D protein	LOC_Os07g17330	B12D protein
TraesCS2A02G486100	7.73085	6.92439e-06	7.00468e-05	Up	AT4G18650		transcription factor-related	LOC_Os01g20030	expressed protein
TraesCS3A02G363500	7.72637	0.000124997	0.000876604	Up	AT2G37770	AKR4C9	Aldo-keto reductase family 4 member C9	LOC_Os01g62880	oxidoreductase
TraesCS6B02G137300	7.72565	1.02284e-06	1.28188e-05	Up	AT3G13040		myb-like HTH transcriptional regulator family protein	LOC_Os02g04640	Myb-like DNA-binding domain containing protein
TraesCS4D02G238600	7.72467	2.4049e-26	5.01882e-24	Up	AT2G16060	AHB1	Non-symbiotic hemoglobin 1	LOC_Os03g12510	non-symbiotic hemoglobin 2
TraesCSU02G001500	7.72038	3.2545e-05	0.000273312	Up	AT4G27970	SLAH2	S-type anion channel SLAH2	LOC_Os01g43460	C4-dicarboxylate transporter/malic acid transport protein
TraesCS3D02G250400	7.72001	0.00301524	0.0132229	Up				LOC_Os01g51470	expressed protein
TraesCS7A02G424200	7.71743	9.65737e-05	0.000703033	Up	AT1G71800	CSTF64	Cleavage stimulating factor 64	LOC_Os06g13839	RNA recognition motif containing protein
TraesCS2A02G523800	7.71701	2.28386e-05	0.00020047	Up				LOC_Os04g54620	expressed protein
TraesCS3B02G119600	7.71249	1.93806e-07	2.87275e-06	Up	AT2G37710	LECRK41	L-type lectin-domain containing receptor kinase IV.1	LOC_Os06g14260	lectin-like receptor kinase
TraesCS6B02G173800	7.7031	0.000103257	0.00074448	Up				LOC_Os12g35470	expressed protein
TraesCS1A02G291700	7.70104	9.4572e-06	9.22697e-05	Up	AT1G07660		Histone H4	LOC_Os05g39050	Core histone H2A/H2B/H3/H4 domain containing protein
TraesCS2D02G131000	7.70044	5.08179e-05	0.000402238	Up	AT3G59140	ABCC10	ABC transporter C family member 10	LOC_Os06g06440	ABC transporter
TraesCS2B02G507500	7.70038	2.08592e-05	0.000185119	Up	AT1G61720	BAN	Anthocyanidin reductase	LOC_Os04g53850	leucoanthocyanidin reductase
TraesCS7B02G211600	7.70011	8.88735e-07	1.12768e-05	Up	AT3G26744	SCRM	Transcription factor ICE1	LOC_Os11g32100	inducer of CBF expression 1
TraesCS1B02G446900	7.69825	9.11132e-06	8.9226e-05	Up	AT3G10020		unknown protein%3B FUNCTIONS IN: molecular_function unknown%3B INVOLVED IN: response to oxidative stress%2C anaerobic respiration%3B LOCATED IN: cellular_component unknown%3B EXPRESSED IN: 23 plant structures%3B EXPRESSED DURING: 13 growth stages%3B Has 47 Blast /.../o 47 proteins in 12 species: Archae - 0%3B Bacteria - 0%3B Metazoa - 1%3B Fungi - 0%3B Plants - 46%3B Viruses - 0%3B Other Eukaryot…	LOC_Os11g05170	expressed protein
TraesCS5B02G127000	7.69819	0.000114905	0.000815851	Up				LOC_Os11g05530	expressed protein
TraesCS2D02G495600	7.69385	6.08099e-07	8.02102e-06	Up				LOC_Os07g38650	ubiquitin-like protein SMT3
TraesCS4D02G172500	7.6931	2.9148e-05	0.000247838	Up	AT5G05220		unknown protein%3B Has 30201 Blast hits to 17322 proteins in 780 species: Archae - 12%3B Bacteria - 1396%3B Metazoa - 17338%3B Fungi - 3422%3B Plants - 5037%3B Viruses - 0%3B Other Eukaryotes - 2996 (source: NCBI BLink).	LOC_Os03g21650	expressed protein
TraesCS4A02G059400	7.69164	5.62107e-46	5.1209e-43	Up	AT1G70440	SRO3	Probable inactive poly	LOC_Os03g12820	ATP8
TraesCS2D02G417600	7.69096	3.65947e-05	0.000302205	Up
TraesCS1B02G276500	7.6893	4.94728e-42	3.6336e-39	Up				LOC_Os01g04050	BBTI12 - Bowman-Birk type bran trypsin inhibitor precursor
TraesCS6D02G382100	7.68705	0.013229	0.044216	Up	AT1G04360	ATL1	RING-H2 finger protein ATL1	LOC_Os02g57460	RING-H2 finger protein ATL5G
TraesCS4A02G252000	7.68523	3.01883e-06	3.35155e-05	Up	AT3G18830	PLT5	Polyol transporter 5	LOC_Os11g41850	transporter family protein
TraesCS5D02G477000	7.68342	0.000298101	0.00185499	Up	AT2G21110	DIR4	Dirigent protein 4	LOC_Os03g59440	dirigent
TraesCS3A02G171500	7.68256	0.000778697	0.00421278	Up	AT3G51550	FER	Receptor-like protein kinase FERONIA	LOC_Os01g56330	TKL_IRAK_CrRLK1L-1.5 - The CrRLK1L-1 subfamily has homology to the CrRLK1L homolog
TraesCS5D02G068400	7.67985	3.69214e-10	9.48524e-09	Up	AT1G47480	CXE2	Probable carboxylesterase 2	LOC_Os02g35940	gibberellin receptor GID1L2
TraesCS3D02G301500	7.67796	0.00157035	0.00764389	Up	AT1G19310		RING/U-box superfamily protein	LOC_Os01g56070	RING finger protein
TraesCS6B02G288300	7.67415	2.15482e-13	9.6121e-12	Up	AT5G48930	HST	Shikimate O-hydroxycinnamoyltransferase	LOC_Os08g43040	transferase family protein
TraesCS1B02G323300	7.67311	3.03409e-05	0.000256782	Up	AT2G35000	ATL9	E3 ubiquitin-protein ligase ATL9	LOC_Os02g15010	zinc finger
TraesCS1A02G265600	7.67176	8.28144e-35	3.71864e-32	Up				LOC_Os01g04050	BBTI12 - Bowman-Birk type bran trypsin inhibitor precursor
TraesCS1D02G266100	7.66948	3.04653e-12	1.13506e-10	Up				LOC_Os01g04050	BBTI12 - Bowman-Birk type bran trypsin inhibitor precursor
TraesCS7A02G158800	7.66341	0.000163623	0.00110379	Up				LOC_Os07g35110	Leucine Rich Repeat family protein
TraesCSU02G026500	7.66127	6.62751e-05	0.000506436	Up	AT5G24090	CHIB1	Acidic endochitinase	LOC_Os06g25010	glycosyl hydrolase
TraesCS3D02G409100	7.65585	4.45195e-07	6.05666e-06	Up				LOC_Os07g35190	expressed protein
TraesCS3D02G057500	7.64672	7.78212e-06	7.76458e-05	Up	AT2G26340		unknown protein%3B FUNCTIONS IN: molecular_function unknown%3B INVOLVED IN: biological_process unknown%3B LOCATED IN: chloroplast thylakoid membrane%2C chloroplast thylakoid lumen%2C chloroplast%3B EXPRESSED IN: 22 plant structures%3B EXPRESSED DURING: 13 growth /.../%3B Has 38 Blast hits to 38 proteins in 13 species: Archae - 0%3B Bacteria - 0%3B Metazoa - 0%3B Fungi - 0%3B Plants - 38%3B Viruse…	LOC_Os03g07970	expressed protein
TraesCS1A02G257700	7.64633	3.59139e-05	0.000297413	Up				LOC_Os09g17190	OsFBX320 - F-box domain containing protein
TraesCS6B02G406200	7.64618	3.87788e-07	5.34336e-06	Up	AT4G37990	CAD8	Cinnamyl alcohol dehydrogenase 8	LOC_Os10g29470	dehydrogenase
TraesCS3B02G351200	7.64551	7.63563e-05	0.00057274	Up	AT1G27410	AT1G27420/F17L21.21	DNA repair metallo-beta-lactamase family protein	LOC_Os01g57440	DNA repair metallo-beta-lactamase
TraesCS7A02G279600	7.63663	9.79954e-06	9.51973e-05	Up				LOC_Os05g39150	expressed protein
TraesCS7D02G496900	7.63659	1.61245e-07	2.42651e-06	Up	AT3G46730	RPP13L3	Putative disease resistance RPP13-like protein 3	LOC_Os08g10440	NBS-LRR disease resistance protein
TraesCS3B02G546600	7.63595	0.00237973	0.0108389	Up				LOC_Os04g28850	RALFL36 - Rapid ALkalinization Factor RALF family protein precursor
TraesCS6D02G126800	7.63516	7.53361e-05	0.000566132	Up
TraesCS3D02G436200	7.6323	3.8319e-05	0.000314553	Up	AT3G26700		Protein kinase superfamily protein	LOC_Os01g70410	protein kinase
TraesCS6B02G102500	7.63144	0.00132495	0.00661712	Up				LOC_Os03g46510	OsFBX103 - F-box domain containing protein
TraesCS2A02G125800	7.62782	0.00678366	0.0256413	Up				LOC_Os08g03840	expressed protein
TraesCS1A02G306000	7.62507	1.93935e-07	2.87417e-06	Up	AT3G43720	LTPG2	Non-specific lipid transfer protein GPI-anchored 2	LOC_Os05g41030	LTPL67 - Protease inhibitor/seed storage/LTP family protein precursor
TraesCS2B02G243300	7.62466	0.000283822	0.00177839	Up	AT2G03200		Eukaryotic aspartyl protease family protein	LOC_Os07g34920	aspartic proteinase nepenthesin precursor
TraesCS7A02G537600	7.62212	1.58025e-10	4.37658e-09	Up	AT1G08080	ACA7	Alpha carbonic anhydrase 7	LOC_Os08g36630	bifunctional monodehydroascorbate reductase and carbonic anhydrasenectarin-3 precursor
TraesCS3A02G377400	7.61974	7.76309e-05	0.000580935	Up	AT1G09200	HTR2	Histone H3.2	LOC_Os01g64640	histone H3
TraesCS5D02G446800	7.61909	2.81866e-05	0.000240592	Up	AT5G57625		CAP (Cysteine-rich secretory proteins%2C Antigen 5%2C and Pathogenesis-related 1 protein) superfamily protein	LOC_Os07g03710	SCP-like extracellular protein
TraesCS3B02G593300	7.61737	2.30198e-07	3.34977e-06	Up				LOC_Os04g39570	WRKY35
TraesCS7D02G137200	7.61614	1.55223e-07	2.34183e-06	Up	AT4G25650	PTC52	Protochlorophyllide-dependent translocon component 52%2C chloroplastic	LOC_Os03g59110	pheophorbide a oxygenase
TraesCS1A02G276200	7.61424	2.07461e-23	3.39132e-21	Up	AT2G27500		Glucan endo-1%2C3-beta-glucosidase 14	LOC_Os01g64170	glycosyl hydrolases family 17
TraesCS1D02G381200	7.61345	0.000854379	0.00456282	Up	AT3G18280		Bifunctional inhibitor/lipid-transfer protein/seed storage 2S albumin superfamily protein	LOC_Os05g47730	LTPL153 - Protease inhibitor/seed storage/LTP family protein precursor
TraesCS5D02G254900	7.61244	1.43471e-07	2.18613e-06	Up	AT3G05200	ATL6	E3 ubiquitin-protein ligase ATL6	LOC_Os08g37760	zinc finger
TraesCS2B02G107400	7.61177	9.396e-08	1.49018e-06	Up	AT5G25320	ACR2	ACT domain-containing protein ACR2	LOC_Os02g34990	ACT domain containing protein
TraesCS5D02G094200	7.60455	1.45166e-12	5.71887e-11	Up	AT2G28790		Pathogenesis-related thaumatin superfamily protein	LOC_Os12g38150	osmotin
TraesCS2A02G386700	7.60444	9.95567e-05	0.000721974	Up	AT1G62710	bVPE	Vacuolar-processing enzyme beta-isozyme	LOC_Os02g43010	vacuolar-processing enzyme precursor
TraesCS4B02G275300	7.60414	3.17529e-07	4.46522e-06	Up	AT3G22490		Seed maturation protein	LOC_Os03g06360	late embryogenesis abundant protein D-34
TraesCS1A02G010200	7.60363	2.61659e-06	2.95167e-05	Up				LOC_Os10g22520	cellulase
TraesCS3A02G306800	7.60024	2.64432e-07	3.79259e-06	Up	AT2G34140	CDF4	Cyclic dof factor 4	LOC_Os01g55340	dof zinc finger domain containing protein
TraesCS5A02G240100	7.59988	0.00236612	0.0107909	Up				LOC_Os03g05700	expressed protein
TraesCS3A02G157000	7.59919	1.44104e-05	0.000133724	Up	AT1G44110	CYCA1-1	Cyclin-A1-1	LOC_Os01g13260	cyclin-A1
TraesCS5B02G260200	7.5986	2.56476e-05	0.000222121	Up	AT2G44310		Calcium-binding EF-hand family protein	LOC_Os09g31000	EF hand family protein
TraesCS4A02G422200	7.59731	4.35409e-06	4.62584e-05	Up	AT1G47710		Serpin-ZX	LOC_Os05g43590	serpin domain containing protein
TraesCS3D02G357200	7.5944	7.35998e-75	5.36406e-71	Up	AT2G39800	P5CSA	Delta-1-pyrroline-5-carboxylate synthase A	LOC_Os01g62900	amino acid kinase
TraesCS3A02G376700	7.58994	0.000279386	0.00175372	Up	AT1G17180	GSTU25	Glutathione S-transferase U25	LOC_Os07g28480	glutathione S-transferase
TraesCS6D02G251500	7.58901	3.53754e-06	3.85294e-05	Up	AT4G21680	NPF7.2	Protein NRT1/ PTR FAMILY 7.2	LOC_Os02g46460	peptide transporter PTR2
TraesCS6D02G149600	7.58874	8.16592e-05	0.00060772	Up	AT1G03370		C2 and GRAM domain-containing protein At1g03370	LOC_Os02g10630	GRAM and C2 domains containing protein
TraesCS5A02G501000	7.58778	1.29614e-06	1.58028e-05	Up	AT1G42430		unknown protein%3B BEST Arabidopsis thaliana protein match is: unknown protein (TAIR:AT3G55760.3)%3B Has 186 Blast hits to 143 proteins in 47 species: Archae - 0%3B Bacteria - 23%3B Metazoa - 14%3B Fungi - 6%3B Plants - 87%3B Viruses - 0%3B Other Eukaryotes - 56 (s /.../ NCBI BLink).	LOC_Os03g04100	expressed protein
TraesCS3B02G395900	7.58341	2.20386e-118	1.4656e-113	Up	AT2G39800	P5CSA	Delta-1-pyrroline-5-carboxylate synthase A	LOC_Os01g62900	amino acid kinase
TraesCS2A02G438300	7.58321	2.3166e-07	3.36587e-06	Up	AT3G22370	AOX1A	Ubiquinol oxidase 1a%2C mitochondrial	LOC_Os04g51160	transposon protein
TraesCS4D02G197800	7.58316	8.65884e-06	8.52708e-05	Up	AT2G38905		Low temperature and salt responsive protein family	LOC_Os03g17790	OsRCI2-5 - Putative low temperature and salt responsive protein
TraesCS1D02G081600	7.58309	1.1638e-06	1.43657e-05	Up	AT1G07660		Histone H4	LOC_Os05g39050	Core histone H2A/H2B/H3/H4 domain containing protein
TraesCS7D02G315000	7.58135	5.8639e-06	6.03564e-05	Up	AT3G62160		HXXXD-type acyl-transferase family protein	LOC_Os01g42870	transferase family protein
TraesCS4A02G325900	7.57912	5.25006e-06	5.46978e-05	Up	AT2G19130		G-type lectin S-receptor-like serine/threonine-protein kinase At2g19130	LOC_Os01g12290	S-locus lectin protein kinase family protein
TraesCS2D02G260200	7.57445	1.08934e-09	2.56169e-08	Up				LOC_Os07g02460	expressed protein
TraesCS6D02G169700	7.57287	1.26321e-05	0.000119053	Up				LOC_Os02g11870	expressed protein
TraesCS3A02G532000	7.57065	2.9631e-07	4.19769e-06	Up	AT3G55370	DOF3.6	Dof zinc finger protein DOF3.6	LOC_Os05g02150	expressed protein
TraesCS6B02G142300	7.56992	1.56386e-05	0.000143658	Up				LOC_Os02g05120	expressed protein
TraesCS6D02G082300	7.56904	1.9336e-09	4.33508e-08	Up	AT1G54570		Acyltransferase-like protein At1g54570%2C chloroplastic	LOC_Os01g26039	expressed protein
TraesCS6B02G306000	7.5622	8.38389e-05	0.000621403	Up	AT1G76490	HMG1	hydroxy methylglutaryl CoA reductase 1	LOC_Os09g31970	3-hydroxy-3-methylglutaryl-coenzyme A reductase
TraesCS1A02G003700	7.55892	0.00411272	0.0170845	Up				LOC_Os02g33070	expressed protein
TraesCS7D02G390200	7.55593	0.00172975	0.00829428	Up	AT5G66580		unknown protein%3B FUNCTIONS IN: molecular_function unknown%3B INVOLVED IN: N-terminal protein myristoylation%3B LOCATED IN: cellular_component unknown%3B BEST Arabidopsis thaliana protein match is: unknown protein (TAIR:AT3G50800.1)%3B Has 1807 Blast hits to /.../proteins in 277 species: Archae - 0%3B Bacteria - 0%3B Metazoa - 736%3B Fungi - 347%3B Plants - 385%3B Viruses - 0%3B Other Eukaryotes…	LOC_Os02g09980	expressed protein
TraesCS4A02G305800	7.55186	4.27878e-05	0.000346553	Up	AT4G08850		Probable LRR receptor-like serine/threonine-protein kinase At4g08850	LOC_Os02g34770	receptor-like protein kinase 2 precursor
TraesCS2B02G177300	7.55137	4.65803e-11	1.41151e-09	Up	AT2G46960	CYP709B1	cytochrome P450%2C family 709%2C subfamily B%2C polypeptide 1	LOC_Os07g44130	cytochrome P450 72A1
TraesCS1A02G356300	7.54765	2.51146e-06	2.8497e-05	Up	AT1G34300		G-type lectin S-receptor-like serine/threonine-protein kinase At1g34300	LOC_Os01g47840	S-locus-like receptor protein kinase
TraesCS1B02G184300	7.54733	0.00197574	0.00928079	Up				LOC_Os10g34760	RIPER3 - Ripening-related family protein precursor
TraesCS3B02G317400	7.54649	1.62493e-17	1.31362e-15	Up	AT2G34340		Protein of unknown function%2C DUF584	LOC_Os01g52740	expressed protein
TraesCS7D02G306300	7.54568	1.75751e-11	5.75189e-10	Up	AT5G03555	NCS1	Purine-uracil permease NCS1	LOC_Os02g44680	allantoin permease
TraesCS3D02G519600	7.54555	5.24921e-10	1.31746e-08	Up	AT1G43710	SDC	Serine decarboxylase	LOC_Os02g33710	decarboxylase
TraesCS2B02G510300	7.54509	0.0111562	0.0384898	Up	AT3G27020	YSL6	Probable metal-nicotianamine transporter YSL6	LOC_Os04g32050	transposon protein
TraesCS5D02G050800	7.54075	1.28509e-05	0.000120875	Up	AT4G16160	OEP162	Outer envelope pore protein 16-2%2C chloroplastic	LOC_Os01g19770	mitochondrial import inner membrane translocase subunit Tim17
TraesCS3D02G396800	7.54041	4.07005e-16	2.73296e-14	Up	AT5G06060		Tropinone reductase homolog At5g06060	LOC_Os11g43200	tropinone reductase 2
TraesCS4A02G019800	7.53923	1.94008e-13	8.71159e-12	Up	AT5G39530		Protein of unknown function (DUF1997)	LOC_Os03g07200	expressed protein
TraesCS3A02G374700	7.53853	1.04479e-16	7.57958e-15	Up	AT1G30700		FAD-binding Berberine family protein	LOC_Os08g06170	berberine and berberine like domain containing protein
TraesCS1D02G207300	7.53321	0.000509802	0.00293752	Up				LOC_Os09g27430	expressed protein
TraesCS6A02G102400	7.53251	1.2594e-07	1.94115e-06	Up	AT1G64530	NLP6	Protein NLP6	LOC_Os02g04340	NIN-like protein 2
TraesCS2B02G180700	7.52834	0.00114679	0.00585637	Up	AT1G58807	RDL5	Probable disease resistance protein RDL5	LOC_Os11g37870	stripe rust resistance protein Yr10
TraesCS2D02G157900	7.52747	2.19351e-06	2.52645e-05	Up	AT2G46950	CYP709B2	cytochrome P450%2C family 709%2C subfamily B%2C polypeptide 2	LOC_Os07g23570	cytochrome P450 72A1
TraesCS3B02G142500	7.52623	3.22459e-06	3.54963e-05	Up	AT4G03070	AOP1	Probable 2-oxoglutarate-dependent dioxygenase AOP1	LOC_Os08g32160	oxidoreductase
TraesCS2B02G298300	7.52159	0.000160667	0.00108644	Up	AT1G67480		F-box/kelch-repeat protein At1g67480	LOC_Os04g31120	OsFBK14 - F-box domain and kelch repeat containing protein
TraesCS7A02G333100	7.51659	1.18844e-05	0.000112769	Up	AT3G22490		Seed maturation protein	LOC_Os06g23350	late embryogenesis abundant protein D-34
TraesCS3B02G170000	7.5153	5.18007e-05	0.000408515	Up				LOC_Os01g40750	expressed protein
TraesCS5A02G216200	7.51431	9.85616e-07	1.23834e-05	Up	AT1G17290	ALAAT1	Alanine aminotransferase 1%2C mitochondrial	LOC_Os09g26380	aminotransferase
TraesCS5A02G087100	7.51192	0.000118216	0.00083657	Up	AT5G49620	MYB78	myb domain protein 78	LOC_Os12g37690	MYB family transcription factor
TraesCS1B02G433700	7.50747	2.3643e-05	0.000206611	Up	AT3G48140	T24C20_20	B12D protein	LOC_Os07g17330	B12D protein
TraesCS6B02G211900	7.50575	2.81885e-06	3.15691e-05	Up	AT3G01270		Probable pectate lyase 7	LOC_Os06g38510	pectate lyase precursor
TraesCS7D02G271400	7.50572	9.07413e-05	0.000665741	Up	AT3G51060	SRS1	Protein SHI RELATED SEQUENCE 1	LOC_Os08g43410	LRP1
TraesCS7A02G371600	7.50322	2.43778e-23	3.94821e-21	Up				LOC_Os10g28080	glycosyl hydrolase
TraesCS2A02G035600	7.5024	1.44454e-05	0.00013401	Up	AT3G50270		HXXXD-type acyl-transferase family protein	LOC_Os08g01980	transferase family protein
TraesCSU02G223800	7.50149	1.35305e-06	1.64375e-05	Up	AT3G57030	SSL10	Protein STRICTOSIDINE SYNTHASE-LIKE 10	LOC_Os06g41850	SMP-30/Gluconolaconase/LRE-like region containing protein
TraesCS7A02G343600	7.50026	1.40356e-06	1.69857e-05	Up	AT2G46330	AGP16	Arabinogalactan peptide 16	LOC_Os02g16500	expressed protein
TraesCS5A02G163500	7.49972	1.97404e-05	0.000176263	Up	AT4G31830		unknown protein%3B Has 42 Blast hits to 42 proteins in 10 species: Archae - 0%3B Bacteria - 0%3B Metazoa - 0%3B Fungi - 0%3B Plants - 42%3B Viruses - 0%3B Other Eukaryotes - 0 (source: NCBI BLink).	LOC_Os09g04100	expressed protein
TraesCS2B02G149900	7.49721	2.66834e-05	0.000229852	Up	AT1G15520	ABCG40	ABC transporter G family member 40	LOC_Os09g16449	pleiotropic drug resistance protein 4
TraesCS7A02G564900	7.49166	4.4686e-08	7.61341e-07	Up	AT4G23150	CRK7	Cysteine-rich receptor-like protein kinase 7	LOC_Os10g12620	protein kinase domain containing protein
TraesCS6A02G377600	7.49002	8.75822e-06	8.61166e-05	Up	AT1G21230	WAK5	Wall-associated receptor kinase 5	LOC_Os02g56630	OsWAK24 - OsWAK receptor-like protein kinase
TraesCS5D02G218400	7.4886	9.79977e-105	2.32122e-100	Up	AT1G54100	ALDH7B4	Aldehyde dehydrogenase family 7 member B4	LOC_Os09g26880	aldehyde dehydrogenase
TraesCS3B02G549000	7.48626	0.00260399	0.0116889	Up	AT3G01420	DOX1	Alpha-dioxygenase 1	LOC_Os12g26290	alpha-DOX2
TraesCS6D02G361500	7.48579	6.18815e-06	6.33414e-05	Up	AT3G09220	LAC7	Laccase-7	LOC_Os11g42200	laccase precursor protein
TraesCS5B02G208300	7.48352	2.53428e-06	2.87147e-05	Up	AT2G05940		Protein kinase superfamily protein	LOC_Os09g27010	tyrosine protein kinase domain containing protein
TraesCS2D02G330000	7.48243	4.557e-07	6.18741e-06	Up	AT4G05030		Copper transport protein family	LOC_Os02g37300	heavy metal associated domain containing protein
TraesCS3D02G143900	7.48113	2.67593e-05	0.00023038	Up	AT1G48605	HAL3B	Probable phosphopantothenoylcysteine decarboxylase	LOC_Os06g09910	phosphopantothenoylcysteine decarboxylase
TraesCS3B02G315200	7.48107	0.00118767	0.00603782	Up	AT1G78780		pathogenesis-related family protein	LOC_Os01g53090	pathogen-related protein
TraesCS2A02G281900	7.47857	3.15377e-06	3.48138e-05	Up	AT5G47920		unknown protein%3B BEST Arabidopsis thaliana protein match is: unknown protein (TAIR:AT5G13880.1)%3B Has 1807 Blast hits to 1807 proteins in 277 species: Archae - 0%3B Bacteria - 0%3B Metazoa - 736%3B Fungi - 347%3B Plants - 385%3B Viruses - 0%3B Other Eukaryotes - /.../source: NCBI BLink).	LOC_Os04g31350	expressed protein
TraesCS7B02G070300	7.47854	0.00128319	0.00644186	Up	AT1G54210	ATG12A	Ubiquitin-like protein ATG12A	LOC_Os06g10340	autophagy-related protein 12
TraesCS2D02G165600	7.4784	2.46835e-14	1.25946e-12	Up	AT2G38900		Serine protease inhibitor%2C potato inhibitor I-type family protein	LOC_Os01g42860	inhibitor I family protein
TraesCS4B02G237300	7.4772	1.04263e-31	3.69982e-29	Up	AT2G16060	AHB1	Non-symbiotic hemoglobin 1	LOC_Os03g12510	non-symbiotic hemoglobin 2
TraesCS4A02G198100	7.47123	3.43652e-08	5.98523e-07	Up	AT1G19490		Basic-leucine zipper (bZIP) transcription factor family protein	LOC_Os11g05640	bZIP transcription factor domain containing protein
TraesCS7A02G402400	7.46987	0.00303533	0.0132969	Up	AT1G51130	NSE4A	Non-structural maintenance of chromosomes element 4 homolog A	LOC_Os06g41380	expressed protein
TraesCS2D02G324300	7.46933	1.53674e-12	6.02399e-11	Up	AT3G28960		Transmembrane amino acid transporter family protein	LOC_Os04g38680	transmembrane amino acid transporter protein
TraesCS6B02G169800	7.46505	0.00503178	0.020114	Up	AT3G48280	CYP71A25	Cytochrome P450 71A25	LOC_Os06g43520	cytochrome P450 71D7
TraesCS7B02G294500	7.46434	0.00117149	0.00596583	Up	AT4G31690	REM9	B3 domain-containing protein REM9	LOC_Os06g42630	B3 DNA binding domain containing protein
TraesCS1B02G456900	7.46393	7.50644e-07	9.6868e-06	Up	AT5G44410		FAD-binding Berberine family protein	LOC_Os06g35550	retrotransposon protein
TraesCS2D02G518300	7.46295	0.00164298	0.0079474	Up	AT2G20340	ELI5	Tyrosine decarboxylase 1	LOC_Os08g04540	decarboxylase
TraesCS4A02G235100	7.46284	0.000369216	0.00222644	Up	AT5G66870	LBD36	LOB domain-containing protein 36	LOC_Os03g41600	DUF260 domain containing protein
TraesCS3B02G235500	7.45983	1.14152e-16	8.24974e-15	Up	AT4G33000	CBL10	Calcineurin B-like protein 10	LOC_Os01g39770	calcineurin B
TraesCS2B02G338400	7.45673	0.000132715	0.000923116	Up	AT1G34580	STP5	Sugar transport protein 5	LOC_Os04g37980	transporter family protein
TraesCS1B02G237600	7.45584	0.00355211	0.0151547	Up	AT2G40170	EM6	Em-like protein GEA6	LOC_Os05g28210	small hydrophilic plant seed protein
TraesCS3B02G328700	7.45575	1.67923e-10	4.62501e-09	Up	AT1G78440	GA2OX1	Gibberellin 2-beta-dioxygenase 1	LOC_Os01g55240	gibberellin 2-beta-dioxygenase
TraesCS6B02G128200	7.4536	0.00241699	0.0109827	Up	AT1G54570		Acyltransferase-like protein At1g54570%2C chloroplastic	LOC_Os01g26039	expressed protein
TraesCS5D02G343400	7.45285	5.81773e-19	5.66502e-17	Up	AT1G03670		ankyrin repeat family protein	LOC_Os11g08050	expressed protein
TraesCS2B02G389900	7.44993	1.41718e-06	1.71419e-05	Up	AT4G04930	DES-1-LIKE	Sphingolipid delta(4)-desaturase DES1-like	LOC_Os02g42660	sphingolipid delta desaturase
TraesCS1A02G374400	7.44741	0.00647275	0.0246922	Up	AT3G18280		Bifunctional inhibitor/lipid-transfer protein/seed storage 2S albumin superfamily protein	LOC_Os05g47730	LTPL153 - Protease inhibitor/seed storage/LTP family protein precursor
TraesCS2D02G396700	7.44693	7.73184e-14	3.66831e-12	Up	AT1G63010		SPX domain-containing membrane protein At1g63010	LOC_Os04g48390	uncharacterized membrane protein
TraesCS2B02G117900	7.44551	3.56227e-08	6.18264e-07	Up	AT5G17810	WOX12	WUSCHEL-related homeobox 12	LOC_Os07g48560	homeobox domain containing protein
TraesCS3D02G514000	7.4451	1.73399e-14	9.0567e-13	Up	AT5G45310		unknown protein%3B LOCATED IN: endomembrane system%3B EXPRESSED IN: stem%2C inflorescence meristem%2C root%2C leaf%3B EXPRESSED DURING: LP.04 four leaves visible%3B Has 30201 Blast hits to 17322 proteins in 780 species: Archae - 12%3B Bacteria - 1396%3B Metazoa - 173 /.../ngi - 3422%3B Plants - 5037%3B Viruses - 0%3B Other Eukaryotes - 2996 (source: NCBI BLink).	LOC_Os01g73110	expressed protein
TraesCS2A02G019700	7.44142	2.54778e-06	2.88419e-05	Up	AT3G14470	RPPL1	Putative disease resistance RPP13-like protein 1	LOC_Os10g04540	expressed protein
TraesCS6B02G295400	7.43647	6.75806e-06	6.85471e-05	Up	AT5G17160		unknown protein%3B BEST Arabidopsis thaliana protein match is: unknown protein (TAIR:AT3G03130.1)%3B Has 14330 Blast hits to 10381 proteins in 896 species: Archae - 94%3B Bacteria - 2881%3B Metazoa - 4019%3B Fungi - 1576%3B Plants - 515%3B Viruses - 110%3B Other Eu /.../es - 5135 (source: NCBI BLink).	LOC_Os02g47130	expressed protein
TraesCS5A02G143200	7.43633	2.05754e-11	6.64429e-10	Up	AT3G15510	ATNAC2	NAC domain containing protein 2	LOC_Os11g03300	NAC domain transcription factor
TraesCS1A02G406700	7.43591	0.000447977	0.00262876	Up	AT2G36760	UGT73C2	UDP-glycosyltransferase 73C2	LOC_Os05g08480	cytokinin-O-glucosyltransferase 1
TraesCS1D02G219200	7.43079	1.59917e-06	1.90705e-05	Up	AT4G16970		Protein kinase superfamily protein	LOC_Os10g41390	protein kinase domain containing protein
TraesCS7B02G215300	7.43028	3.80678e-05	0.000312654	Up	AT5G63370	CDKG1	Cyclin-dependent kinase G1	LOC_Os12g23930	protein kinase domain containing protein
TraesCS3B02G047000	7.42786	9.51673e-05	0.000694181	Up	AT1G68380		Core-2/I-branching beta-1%2C6-N-acetylglucosaminyltransferase family protein	LOC_Os01g04210	DNA binding protein
TraesCS1A02G333500	7.42646	0.000180987	0.00120326	Up	AT1G70630		Nucleotide-diphospho-sugar transferase family protein	LOC_Os05g43810	expressed protein
TraesCS2B02G471900	7.42542	0.00079269	0.00427896	Up	AT2G35930	PUB23	E3 ubiquitin-protein ligase PUB23	LOC_Os04g49970	U-box
TraesCS1B02G276700	7.42189	1.34877e-12	5.33126e-11	Up				LOC_Os01g04050	BBTI12 - Bowman-Birk type bran trypsin inhibitor precursor
TraesCS2D02G182400	7.42118	0.00102331	0.00531928	Up	AT5G15630	COBL4	COBRA-like protein 4	LOC_Os05g32110	COBRA
TraesCS3D02G434200	7.42092	2.6211e-10	6.93489e-09	Up	AT3G62160		HXXXD-type acyl-transferase family protein	LOC_Os01g42870	transferase family protein
TraesCS5A02G063000	7.41997	6.94693e-05	0.000527695	Up				LOC_Os12g40330	expressed protein
TraesCS5A02G294000	7.41785	9.74799e-08	1.54007e-06	Up	AT5G47920		unknown protein%3B BEST Arabidopsis thaliana protein match is: unknown protein (TAIR:AT5G13880.1)%3B Has 1807 Blast hits to 1807 proteins in 277 species: Archae - 0%3B Bacteria - 0%3B Metazoa - 736%3B Fungi - 347%3B Plants - 385%3B Viruses - 0%3B Other Eukaryotes - /.../source: NCBI BLink).	LOC_Os09g33650	expressed protein
TraesCS6A02G142700	7.41767	6.82387e-08	1.11529e-06	Up
TraesCS6D02G296800	7.41749	0.00101663	0.00529121	Up				LOC_Os05g03490	expressed protein
TraesCS7D02G080900	7.41663	5.36986e-07	7.17389e-06	Up	AT5G49690	UGT91C1	UDP-glycosyltransferase 91C1	LOC_Os03g59030	UDP-rhamnose rhamnosyltransferase
TraesCS1D02G175200	7.41633	3.06988e-06	3.40023e-05	Up	AT1G73190	TIP3-1	Aquaporin TIP3-1	LOC_Os10g35050	aquaporin protein
TraesCS6A02G277800	7.40729	0.000160623	0.00108625	Up	AT1G76490	HMG1	hydroxy methylglutaryl CoA reductase 1	LOC_Os08g40180	3-hydroxy-3-methylglutaryl-coenzyme A reductase
TraesCS1D02G119000	7.40397	1.80248e-05	0.000162677	Up	AT2G36750	UGT73C1	UDP-glycosyltransferase 73C1	LOC_Os05g08480	cytokinin-O-glucosyltransferase 1
TraesCS7A02G106000	7.39675	9.64403e-29	2.58117e-26	Up	AT1G31490		HXXXD-type acyl-transferase family protein	LOC_Os06g05790	transferase family domain containing protein
TraesCS4B02G290500	7.39655	7.01032e-14	3.34441e-12	Up				LOC_Os03g07870	expressed protein
TraesCS1D02G214900	7.3934	0.00050319	0.00290455	Up	AT3G60580	ZAT9	Zinc finger protein ZAT9	LOC_Os10g40660	ZOS10-07 - C2H2 zinc finger protein
TraesCS2A02G210100	7.39157	3.56701e-05	0.000295716	Up	AT5G16910	CSLD2	Cellulose synthase-like protein D2	LOC_Os07g36630	CSLF8 - cellulose synthase-like family F; beta1
TraesCS6B02G153600	7.38845	3.69392e-05	0.00030444	Up				LOC_Os05g04390	expressed protein
TraesCS3A02G082500	7.38838	0.000300259	0.00186694	Up	AT2G02230	PP2B1	F-box protein PP2-B1	LOC_Os02g56840	OsFBX70 - F-box domain containing protein
TraesCS4D02G359800	7.38514	8.63932e-33	3.34098e-30	Up	AT5G48930	HST	Shikimate O-hydroxycinnamoyltransferase	LOC_Os03g08720	transferase family protein
TraesCS2A02G460500	7.38423	9.57324e-07	1.20599e-05	Up
TraesCS2A02G507400	7.38137	6.6516e-20	7.10499e-18	Up	AT4G21585	ENDO4	Endonuclease 4	LOC_Os04g55850	nuclease PA3
TraesCS2B02G439800	7.38124	1.49963e-05	0.00013855	Up
TraesCS2B02G306900	7.38068	6.73291e-06	6.83213e-05	Up				LOC_Os04g33070	expressed protein
TraesCS1D02G044400	7.38019	0.00434032	0.0178802	Up				LOC_Os12g07310	citrate-binding protein precursor
TraesCS4A02G235900	7.37975	5.76722e-07	7.64545e-06	Up	AT1G47710		Serpin-ZX	LOC_Os03g41438	serpin domain containing protein
TraesCS3D02G039300	7.3796	1.34245e-36	6.91258e-34	Up	AT1G03220		Eukaryotic aspartyl protease family protein	LOC_Os01g71080	xylanase inhibitor
TraesCS6A02G301300	7.37929	3.89531e-18	3.44921e-16	Up	AT1G34300		G-type lectin S-receptor-like serine/threonine-protein kinase At1g34300	LOC_Os06g13320	protein kinase
TraesCS2A02G507300	7.37858	0.000645066	0.00358418	Up	AT4G21585	ENDO4	Endonuclease 4	LOC_Os04g55850	nuclease PA3
TraesCS3A02G490400	7.37573	2.47079e-06	2.80995e-05	Up	AT3G27890	NQR	NADPH:quinone oxidoreductase	LOC_Os01g72430	NADPH quinone oxidoreductase
TraesCS6A02G355800	7.37514	0.014962	0.0487798	Up	AT1G53030	COX17-2	Cytochrome c oxidase copper chaperone 2	LOC_Os02g55134	cytochrome c oxidase copper chaperone
TraesCS2B02G314100	7.37332	0.000173329	0.00115911	Up	AT3G11680	ALMT8	Aluminum-activated malate transporter 8	LOC_Os04g34010	aluminum-activated malate transporter
TraesCS2D02G558500	7.37283	7.53479e-06	7.54677e-05	Up	AT3G04710	TPR10	ankyrin repeat family protein	LOC_Os01g09384	ankyrin repeat domain containing protein
TraesCS1A02G314800	7.37144	0.000162967	0.00109967	Up	AT3G22840	ELIP1	Early light-induced protein 1%2C chloroplastic	LOC_Os07g08160	early light-induced protein
TraesCS1A02G370600	7.36908	5.80133e-06	5.97579e-05	Up	AT4G34410	ERF109	Ethylene-responsive transcription factor ERF109	LOC_Os08g36920	AP2 domain containing protein
TraesCS3A02G084200	7.36792	2.80227e-13	1.22862e-11	Up	AT2G27430		ARM repeat superfamily protein	LOC_Os05g49810	armadillo/beta-catenin-like repeat containing protein
TraesCS3D02G147100	7.36767	1.26009e-05	0.00011883	Up	AT2G35000	ATL9	E3 ubiquitin-protein ligase ATL9	LOC_Os01g11520	RING-H2 finger protein
TraesCS2A02G000400	7.36407	1.06947e-53	1.51236e-50	Up	AT5G51760	AHG1	Probable protein phosphatase 2C 75	LOC_Os05g38290	protein phosphatase 2C
TraesCS3A02G285800	7.36332	0.000322335	0.00198208	Up	AT3G18990	VRN1	B3 domain-containing transcription factor VRN1	LOC_Os01g52514	B3 DNA binding domain containing protein
TraesCS1D02G117100	7.36265	5.0498e-43	3.85845e-40	Up	AT1G80160		Lactoylglutathione lyase / glyoxalase I family protein	LOC_Os05g07940	glyoxalase family protein
TraesCS6A02G320700	7.35809	2.20517e-07	3.22324e-06	Up	AT5G20400		2-oxoglutarate (2OG) and Fe(II)-dependent oxygenase superfamily protein	LOC_Os06g07932	flavonol synthase/flavanone 3-hydroxylase
TraesCS3A02G347000	7.35279	2.87885e-05	0.000245045	Up				LOC_Os03g24560	ompA/MotB
TraesCS3D02G351300	7.35054	0.000102438	0.00073919	Up	AT5G22880	H2B	Histone H2B.10	LOC_Os08g38300	Core histone H2A/H2B/H3/H4 domain containing protein
TraesCS4A02G078200	7.35014	0.000149774	0.0010234	Up				LOC_Os03g12690	expressed protein
TraesCS7B02G271151	7.34386	5.35627e-06	5.56697e-05	Up
TraesCS4B02G305200	7.33823	0.00011879	0.000839788	Up
TraesCS6A02G346100	7.33486	0.000903548	0.00478629	Up	AT2G24370		Protein kinase protein with adenine nucleotide alpha hydrolases-like domain	LOC_Os02g54590	serine threonine kinase
TraesCS6D02G376600	7.33405	0.000434559	0.00256129	Up	AT4G21390	B120	G-type lectin S-receptor-like serine/threonine-protein kinase B120	LOC_Os09g37834	serine/threonine-protein kinase receptor precursor
TraesCS2D02G547800	7.33357	6.18679e-05	0.000477882	Up	AT5G43060		Granulin repeat cysteine protease family protein	LOC_Os04g57490	cysteine protease
TraesCS3D02G078900	7.33352	1.84497e-13	8.31606e-12	Up	AT1G61110	NAC025	NAC transcription factor 25	LOC_Os01g01430	No apical meristem protein
TraesCS5D02G359700	7.331	5.12506e-05	0.000405067	Up	AT1G20720		RAD3-like DNA-binding helicase protein	LOC_Os09g37920	helicase
TraesCS7A02G543300	7.33002	2.36737e-07	3.4286e-06	Up	AT5G65640	BHLH93	Transcription factor bHLH93	LOC_Os06g50900	expressed protein
TraesCS3B02G367900	7.32987	0.00269058	0.0120229	Up	AT2G27080		Late embryogenesis abundant (LEA) hydroxyproline-rich glycoprotein family	LOC_Os01g59680	NHL25
TraesCS1D02G061000	7.32948	0.00572797	0.0223528	Up
TraesCS7D02G493000	7.32466	0.00114034	0.00582945	Up	AT4G27250		NAD(P)-binding Rossmann-fold superfamily protein	LOC_Os06g44170	NAD dependent epimerase/dehydratase family protein
TraesCS2B02G513900	7.3148	7.87156e-05	0.000588309	Up	AT4G10270		Wound-responsive family protein	LOC_Os04g54300	wound induced protein
TraesCS6A02G298400	7.31382	8.72212e-05	0.000642852	Up	AT5G13930	CHS	Chalcone synthase	LOC_Os07g17010	chalcone synthase
TraesCS5A02G183800	7.31304	0.000542128	0.00309275	Up	AT1G28440	HSL1	Receptor-like protein kinase HSL1	LOC_Os09g15700	receptor-like protein kinase 5 precursor
TraesCS7A02G434900	7.30752	9.65224e-06	9.39502e-05	Up
TraesCS7A02G463100	7.30746	0.000417058	0.00247121	Up				LOC_Os03g06840	GRF zinc finger family protein
TraesCS1D02G372900	7.30152	1.30026e-05	0.000122047	Up	AT2G32510	MAPKKK17	mitogen-activated protein kinase kinase kinase 17	LOC_Os05g46760	STE_MEKK_ste11_MAP3K.19 - STE kinases include homologs to sterile 7
TraesCS2B02G454500	7.295	1.09778e-16	7.94579e-15	Up	AT5G57540	XTH13	Putative xyloglucan endotransglucosylase/hydrolase protein 13	LOC_Os04g51520	glycosyl hydrolases family 16
TraesCS1D02G000500	7.29058	2.07698e-06	2.40569e-05	Up	AT5G08391		Protein of unknown function (DUF 3339)	LOC_Os05g01280	expressed protein
TraesCS2D02G159700	7.29041	7.01915e-06	7.0907e-05	Up				LOC_Os06g05600	OsFBDUF31 - F-box and DUF domain containing protein
TraesCS6B02G174800	7.29025	4.26731e-05	0.000345654	Up	AT3G58730	VHA-D	V-type proton ATPase subunit D	LOC_Os04g55040	vacuolar ATP synthase subunit D 1
TraesCS1A02G265700	7.28911	7.26796e-22	9.99434e-20	Up				LOC_Os01g04050	BBTI12 - Bowman-Birk type bran trypsin inhibitor precursor
TraesCS4D02G192300	7.28543	9.07874e-05	0.000666027	Up				LOC_Os03g18490	RPGR
TraesCS6B02G193500	7.28475	0.003923	0.0164486	Up	AT4G22130	SRF8	Protein STRUBBELIG-RECEPTOR FAMILY 8	LOC_Os02g10110	Leucine Rich Repeat family protein
TraesCS5B02G433900	7.2833	0.000186297	0.0012333	Up				LOC_Os10g41850	expressed protein
TraesCS4A02G107800	7.28198	0.00070283	0.00385785	Up	AT5G38560	PERK8	Proline-rich receptor-like protein kinase PERK8	LOC_Os03g14615	LTPL117 - Protease inhibitor/seed storage/LTP family protein precursor
TraesCS7A02G155000	7.27778	2.04792e-05	0.000182121	Up	AT2G46950	CYP709B2	cytochrome P450%2C family 709%2C subfamily B%2C polypeptide 2	LOC_Os06g09210	cytochrome P450 72A1
TraesCS2D02G372000	7.2776	3.52528e-11	1.09224e-09	Up	AT1G18590	SOT17	Cytosolic sulfotransferase 17	LOC_Os04g44460	sulfotransferase domain containing protein
TraesCS2A02G176400	7.27465	0.000235232	0.00151295	Up	AT5G08030	GDPD6	Glycerophosphodiester phosphodiesterase GDPD6	LOC_Os07g41150	glycerophosphoryl diester phosphodiesterase family protein
TraesCS5A02G213300	7.2721	1.74429e-05	0.000158102	Up	AT1G72490		unknown protein%3B BEST Arabidopsis thaliana protein match is: unknown protein (TAIR:AT1G17400.1)%3B Has 75 Blast hits to 75 proteins in 21 species: Archae - 0%3B Bacteria - 0%3B Metazoa - 3%3B Fungi - 4%3B Plants - 58%3B Viruses - 0%3B Other Eukaryotes - 10 (sourc /.../I BLink).	LOC_Os09g26840	expressed protein
TraesCS5B02G507500	7.27	6.46472e-14	3.10759e-12	Up	AT1G14870	PCR2	Protein PLANT CADMIUM RESISTANCE 2	LOC_Os03g61470	uncharacterized Cys-rich domain containing protein
TraesCSU02G234300	7.26945	1.15332e-05	0.000109888	Up	AT2G29420	GSTU7	Glutathione S-transferase U7	LOC_Os01g72150	glutathione S-transferase
TraesCS1B02G428100	7.26435	3.93875e-06	4.2354e-05	Up				LOC_Os01g34630	retrotransposon protein
TraesCS2A02G457500	7.26221	0.000175053	0.00116907	Up	AT2G27170	SMC3	Structural maintenance of chromosomes protein 3	LOC_Os02g04080	chromosome segregation protein sudA
TraesCS3B02G243500	7.26034	1.29941e-48	1.3529e-45	Up	AT4G13340	LRX3	Leucine-rich repeat extensin-like protein 3	LOC_Os01g41120	retrotransposon protein
TraesCS4D02G123200	7.26016	0.000101326	0.000732327	Up	AT3G25100	CDC45	cell division cycle 45	LOC_Os11g03430	CDC45B - Putative DNA replication initiation protein
TraesCS1A02G416500	7.2599	2.2544e-07	3.28861e-06	Up	AT3G27930		unknown protein%3B FUNCTIONS IN: molecular_function unknown%3B INVOLVED IN: N-terminal protein myristoylation%3B LOCATED IN: cellular_component unknown%3B EXPRESSED IN: 23 plant structures%3B EXPRESSED DURING: 14 growth stages%3B Has 35 Blast hits to 35 protein /.../2 species: Archae - 0%3B Bacteria - 0%3B Metazoa - 0%3B Fungi - 0%3B Plants - 35%3B Viruses - 0%3B Other Eukaryotes - 0 (source: NCB…	LOC_Os05g50200	expressed protein
TraesCS4A02G041700	7.25844	2.62057e-07	3.76137e-06	Up	AT2G18540		RmlC-like cupins superfamily protein	LOC_Os03g10110	cupin domain containing protein
TraesCS2D02G469000	7.25642	0.000914578	0.00483579	Up				LOC_Os04g53320	expressed protein
TraesCS4A02G365700	7.25493	4.33127e-09	9.07698e-08	Up	AT1G14870	PCR2	Protein PLANT CADMIUM RESISTANCE 2	LOC_Os03g61470	uncharacterized Cys-rich domain containing protein
TraesCS3A02G225100	7.25435	9.90942e-42	7.16701e-39	Up	AT5G24030	SLAH3	S-type anion channel SLAH3	LOC_Os01g43460	C4-dicarboxylate transporter/malic acid transport protein
TraesCS4B02G135100	7.2518	1.40454e-05	0.000130747	Up				LOC_Os12g05660	dual specificity protein phosphatase
TraesCSU02G032700	7.25126	0.00201454	0.00943637	Up	AT4G15210	BAM5	Beta-amylase 5	LOC_Os07g35940	beta-amylase
TraesCS5A02G306700	7.24956	0.000552453	0.00314408	Up	AT1G32640	MYC2	Transcription factor MYC2	LOC_Os09g34330	helix-loop-helix DNA-binding domain containing protein
TraesCS4D02G180800	7.24595	1.35133e-30	4.32546e-28	Up	AT2G47180	GOLS1	Galactinol synthase 1	LOC_Os03g20120	glycosyl transferase 8 domain containing protein
TraesCS2B02G538500	7.24346	1.08256e-15	6.78359e-14	Up	AT3G17840	RLK902	Probable inactive receptor kinase RLK902	LOC_Os11g35120	OsWAK116 - OsWAK receptor-like cytoplasmic kinase OsWAK-RLCK
TraesCS2B02G174400	7.23938	1.66662e-06	1.97827e-05	Up	AT1G48130	PER1	1-Cys peroxiredoxin PER1	LOC_Os07g44430	peroxiredoxin
TraesCS5A02G001400	7.23936	0.000429424	0.00253481	Up
TraesCS6B02G439900	7.23907	1.20608e-05	0.000114214	Up				LOC_Os10g04570	expressed protein
TraesCS7B02G350000	7.23389	1.56865e-23	2.58475e-21	Up	AT4G15550	UGT75D1	UDP-glycosyltransferase 75D1	LOC_Os02g10880	UDP-glucoronosyl and UDP-glucosyl transferase domain containing protein
TraesCS7A02G415300	7.22983	0.00012119	0.000853575	Up	AT3G13000		Protein of unknown function%2C DUF547	LOC_Os06g49060	ternary complex factor MIP1
TraesCS7D02G172600	7.22894	0.0105921	0.036912	Up	AT1G34300		G-type lectin S-receptor-like serine/threonine-protein kinase At1g34300	LOC_Os03g62180	lectin protein kinase family protein
TraesCS4B02G383300	7.22871	0.0107009	0.0372116	Up	AT3G24520	HSFC1	Heat stress transcription factor C-1	LOC_Os02g13800	HSF-type DNA-binding domain containing protein
TraesCS7B02G260500	7.22655	0.000102034	0.000736725	Up	AT2G16050		Cysteine/Histidine-rich C1 domain family protein	LOC_Os08g31250	C1-like domain containing protein
TraesCS2D02G431500	7.22527	3.48066e-08	6.04987e-07	Up	AT5G57540	XTH13	Putative xyloglucan endotransglucosylase/hydrolase protein 13	LOC_Os04g51520	glycosyl hydrolases family 16
TraesCS1B02G381800	7.22444	0.000414028	0.00245586	Up	AT3G15670		Late embryogenesis abundant protein (LEA) family protein	LOC_Os05g46480	late embryogenesis abundant protein
TraesCS3D02G320200	7.21908	7.34951e-05	0.000553835	Up				LOC_Os01g58130	expressed protein
TraesCS7D02G190600	7.21669	1.13493e-19	1.18165e-17	Up	AT2G36800	UGT73C5	UDP-glycosyltransferase 73C5	LOC_Os10g09990	cytokinin-O-glucosyltransferase 3
TraesCS3B02G359600	7.215	1.89635e-15	1.14586e-13	Up	AT1G19100		Histidine kinase-%2C DNA gyrase B-%2C and HSP90-like ATPase family protein	LOC_Os11g26830	ATP-binding region
TraesCS7D02G523800	7.21426	1.49711e-18	1.40163e-16	Up	AT1G08065	ACA5	Alpha carbonic anhydrase 5	LOC_Os08g36630	bifunctional monodehydroascorbate reductase and carbonic anhydrasenectarin-3 precursor
TraesCS4A02G196800	7.21386	1.03775e-06	1.29816e-05	Up	AT3G56230		BTB/POZ domain-containing protein At3g56230	LOC_Os12g02030	BTB9 - Bric-a-Brac
TraesCS6A02G124800	7.21356	5.02059e-17	3.80849e-15	Up	AT1G72300	PSYR1	Tyrosine-sulfated glycopeptide receptor 1	LOC_Os02g06070	phytosulfokine receptor precursor
TraesCS1B02G253800	7.21311	2.66228e-05	0.000229434	Up	AT3G15670		Late embryogenesis abundant protein (LEA) family protein	LOC_Os05g46480	late embryogenesis abundant protein
TraesCSU02G105400	7.20823	0.000135318	0.000938296	Up	AT3G47570		Probable LRR receptor-like serine/threonine-protein kinase At3g47570	LOC_Os01g05640	receptor-like protein kinase 5 precursor
TraesCS3A02G228100	7.20631	6.20656e-05	0.000479021	Up	AT3G14690	CYP72A15	Cytochrome P450 72A15	LOC_Os01g43700	cytochrome P450 72A1
TraesCS2A02G112500	7.2049	3.01612e-05	0.000255421	Up	AT2G47710		Adenine nucleotide alpha hydrolases-like superfamily protein	LOC_Os07g47620	universal stress protein domain containing protein
TraesCS4D02G153400	7.20094	1.56032e-14	8.23586e-13	Up	AT5G53970		Probable aminotransferase TAT2	LOC_Os11g42510	tyrosine aminotransferase
TraesCS6A02G059300	7.2006	0.0121349	0.0412505	Up	AT3G55700	UGT76F1	UDP-glycosyltransferase 76F1	LOC_Os03g60960	cytokinin-N-glucosyltransferase 1
TraesCS7A02G238900	7.20046	6.1981e-25	1.16517e-22	Up	AT1G24180	IAR4	Pyruvate dehydrogenase E1 component subunit alpha-2%2C mitochondrial	LOC_Os06g13720	dehydrogenase E1 component domain containing protein
TraesCS3D02G050300	7.1985	1.4026e-06	1.69763e-05	Up	AT3G18270	CYP77A5P	cytochrome P450%2C family 77%2C subfamily A%2C polypeptide 5 pseudogene	LOC_Os01g04630	muconate cycloisomerase
TraesCS3A02G305600	7.19777	1.79732e-05	0.000162272	Up	AT1G52240	ATROPGEF11	RHO guanyl-nucleotide exchange factor 11	LOC_Os01g55510	dynein light chain type 1 domain containing protein
TraesCS1A02G395800	7.1941	0.0145335	0.0476616	Up	AT5G46090		Protein of unknown function (DUF679)	LOC_Os05g48840	expressed protein
TraesCS2B02G230700	7.19364	4.73175e-05	0.00037756	Up	AT1G52855		unknown protein%3B BEST Arabidopsis thaliana protein match is: unknown protein (TAIR:AT3G15534.1)%3B Has 35333 Blast hits to 34131 proteins in 2444 species: Archae - 798%3B Bacteria - 22429%3B Metazoa - 974%3B Fungi - 991%3B Plants - 531%3B Viruses - 0%3B Other Euk /.../s - 9610 (source: NCBI BLink).	LOC_Os07g37700	expressed protein
TraesCS2D02G337800	7.19302	0.00252887	0.0114139	Up	AT3G26310	CYP71B35	Cytochrome P450 71B35	LOC_Os04g40470	cytochrome P450
TraesCS1D02G089900	7.19282	1.01137e-25	2.0131e-23	Up	AT5G48930	HST	Shikimate O-hydroxycinnamoyltransferase	LOC_Os10g23820	transferase family protein
TraesCSU02G243800	7.19012	0.000182106	0.00120961	Up	AT2G19130		G-type lectin S-receptor-like serine/threonine-protein kinase At2g19130	LOC_Os04g34320	S-domain receptor-like protein kinase
TraesCS3B02G107900	7.18716	1.62162e-05	0.000148293	Up	AT5G50150		Protein of Unknown Function (DUF239)	LOC_Os01g07570	carboxyl-terminal proteinase
TraesCS1B02G186500	7.18666	8.87982e-05	0.000652951	Up	AT1G52920	GCR2	LanC-like protein GCR2	LOC_Os10g35480	lanC-like protein 2
TraesCS1A02G352600	7.18661	5.86335e-05	0.000456062	Up	AT3G49240	EMB1796	Pentatricopeptide repeat-containing protein At3g49240	LOC_Os05g45760	EMB1796
TraesCS4D02G282300	7.18262	1.58451e-11	5.24183e-10	Up	AT3G60070		Major facilitator superfamily protein	LOC_Os03g07170	lactose permease-related
TraesCS3D02G494500	7.18261	0.000152192	0.00103826	Up	AT4G13010		Putative quinone-oxidoreductase homolog%2C chloroplastic	LOC_Os04g28990	dehydrogenase
TraesCS6D02G274400	7.18164	2.67931e-05	0.000230609	Up	AT5G37840		BEST Arabidopsis thaliana protein match is: plastid movement impaired 2 (TAIR:AT1G66480.1)%3B Has 1807 Blast hits to 1807 proteins in 277 species: Archae - 0%3B Bacteria - 0%3B Metazoa - 736%3B Fungi - 347%3B Plants - 385%3B Viruses - 0%3B Other Eukaryotes - 339 /.../e: NCBI BLink).	LOC_Os02g49960	expressed protein
TraesCS5D02G157400	7.18132	0.000424146	0.00250834	Up	AT2G30130	LBD12	LOB domain-containing protein 12	LOC_Os05g27980	DUF260 domain containing protein
TraesCS6D02G104900	7.17987	0.00109886	0.00565024	Up				LOC_Os02g57860	OsFBX71 - F-box domain containing protein
TraesCS4D02G346500	7.17804	0.000823171	0.00441982	Up	AT5G64700		WAT1-related protein At5g64700	LOC_Os10g12190	nodulin
TraesCS1D02G147900	7.17767	1.88425e-15	1.13928e-13	Up	AT1G02205	CER1	Protein ECERIFERUM 1	LOC_Os10g33250	WAX2
TraesCS3B02G330900	7.17699	4.71033e-05	0.000376199	Up	AT1G52240	ATROPGEF11	RHO guanyl-nucleotide exchange factor 11	LOC_Os01g55510	dynein light chain type 1 domain containing protein
TraesCS3A02G331200	7.17691	0.00223796	0.0103081	Up	AT3G63060	EDL3	EID1-like F-box protein 3	LOC_Os01g58850	circadian clock coupling factor-related
TraesCS1D02G381300	7.17611	4.57949e-06	4.83926e-05	Up	AT3G18280		Bifunctional inhibitor/lipid-transfer protein/seed storage 2S albumin superfamily protein	LOC_Os05g47730	LTPL153 - Protease inhibitor/seed storage/LTP family protein precursor
TraesCS3B02G041800	7.17457	1.73725e-05	0.000157555	Up				LOC_Os01g03980	expressed protein
TraesCS7D02G383500	7.17126	4.47017e-11	1.3591e-09	Up	AT2G20340	ELI5	Tyrosine decarboxylase 1	LOC_Os08g04540	decarboxylase
TraesCS2D02G072500	7.17016	2.94322e-05	0.000249896	Up	AT1G74190	AtRLP15	receptor like protein 15	LOC_Os04g55420	leucine-rich repeat family protein
TraesCS2D02G467700	7.16858	3.64853e-56	5.66694e-53	Up	AT3G14415	GLO2	Peroxisomal (S)-2-hydroxy-acid oxidase GLO2	LOC_Os04g53210	hydroxyacid oxidase 1
TraesCS1D02G433600	7.16758	8.50324e-22	1.16088e-19	Up	AT5G44390		FAD-binding Berberine family protein	LOC_Os06g35550	retrotransposon protein
TraesCS6B02G139700	7.16292	6.98901e-05	0.000530381	Up	AT4G27030	FAD4	Fatty acid desaturase 4%2C chloroplastic	LOC_Os08g08850	carotenoid synthesis regulator CarF
TraesCS2A02G360500	7.16192	0.00875071	0.031605	Up	AT2G33205		Serinc-domain containing serine and sphingolipid biosynthesis protein	LOC_Os04g42720	TMS membrane protein/tumour differentially expressed protein
TraesCS3B02G218000	7.16144	0.000843893	0.00451446	Up				LOC_Os01g14170	expressed protein
TraesCS2B02G111600	7.15798	9.72773e-05	0.000707665	Up	AT5G45520		Leucine-rich repeat (LRR) family protein	LOC_Os02g34490	Leucine Rich Repeat family protein
TraesCS5D02G490900	7.15788	6.04691e-06	6.20605e-05	Up	AT2G37430	ZAT11	Zinc finger protein ZAT11	LOC_Os03g60570	ZOS3-22 - C2H2 zinc finger protein
TraesCS3D02G324600	7.15541	0.000206027	0.00134548	Up	AT3G63060	EDL3	EID1-like F-box protein 3	LOC_Os01g58850	circadian clock coupling factor-related
TraesCS1A02G267100	7.1543	0.00929442	0.0331837	Up	AT3G46730	RPP13L3	Putative disease resistance RPP13-like protein 3	LOC_Os11g43700	RGH1A
TraesCS2D02G090200	7.15363	0.000446327	0.0026207	Up	AT3G51680	SDR2A	Short-chain dehydrogenase reductase 2a	LOC_Os07g49120	sex determination protein tasselseed-2
TraesCS1B02G122800	7.15254	0.00139409	0.00691069	Up	AT2G37040	PAL1	Phenylalanine ammonia-lyase 1	LOC_Os04g43800	phenylalanine ammonia-lyase
TraesCS6A02G280200	7.15223	7.14949e-25	1.33871e-22	Up	AT1G32450	NPF7.3	Protein NRT1/ PTR FAMILY 7.3	LOC_Os02g48570	peptide transporter PTR2
TraesCS5A02G261400	7.15029	7.58584e-07	9.77329e-06	Up	AT4G20820		FAD-binding Berberine family protein	LOC_Os06g35700	reticuline oxidase-like protein precursor
TraesCS3B02G205800	7.1496	1.7374e-10	4.76858e-09	Up	AT5G24860	FPF1	Flowering-promoting factor 1	LOC_Os01g15340	flowering promoting factor-like 1
TraesCS5D02G212400	7.14897	0.0090345	0.0324248	Up	AT2G26160		F-box protein At2g26160	LOC_Os07g40160	expressed protein
TraesCS3D02G435600	7.14745	0.00455992	0.0186093	Up				LOC_Os11g35080	expressed protein
TraesCS2A02G203900	7.14604	0.000140734	0.000970872	Up	AT1G61260		Protein of unknown function (DUF761)	LOC_Os07g37620	fiber expressed protein
TraesCS5D02G343300	7.14506	0.000594548	0.0033415	Up				LOC_Os06g45040	B-box zinc finger family protein
TraesCS1D02G189900	7.14277	1.35108e-05	0.000126304	Up	AT1G10360	GSTU18	Glutathione S-transferase U18	LOC_Os10g38160	glutathione S-transferase
TraesCS5A02G308800	7.14217	0.000302146	0.00187731	Up	AT2G28100	FUC1	Alpha-L-fucosidase 1	LOC_Os09g34920	glycosyl hydrolase family 29
TraesCS1B02G165000	7.13317	0.00014174	0.00097689	Up				LOC_Os07g40160	expressed protein
TraesCS3B02G496200	7.13018	1.57829e-29	4.58702e-27	Up	AT2G23620	MES1	Methylesterase 1	LOC_Os01g70860	esterase
TraesCS3B02G247700	7.12838	3.18195e-27	7.29967e-25	Up	AT5G63350		unknown protein%3B BEST Arabidopsis thaliana protein match is: unknown protein (TAIR:AT3G48510.1)%3B Has 103 Blast hits to 102 proteins in 13 species: Archae - 0%3B Bacteria - 0%3B Metazoa - 2%3B Fungi - 0%3B Plants - 101%3B Viruses - 0%3B Other Eukaryotes - 0 (sou /.../CBI BLink).	LOC_Os12g13910	expressed protein
TraesCS1D02G289100	7.12654	0.00233334	0.0106694	Up	AT2G32300	UCC1	uclacyanin 1	LOC_Os09g39940	plastocyanin-like domain containing protein
TraesCS2B02G184300	7.12646	1.08762e-14	5.86499e-13	Up	AT2G38900		Serine protease inhibitor%2C potato inhibitor I-type family protein	LOC_Os01g42860	inhibitor I family protein
TraesCS5A02G463400	7.1248	3.08373e-10	8.03994e-09	Up	AT5G49690	UGT91C1	UDP-glycosyltransferase 91C1	LOC_Os10g03320	UDP-glucoronosyl and UDP-glucosyl transferase domain containing protein
TraesCS3D02G357100	7.12163	3.85775e-13	1.66366e-11	Up	AT5G05987	PRA1A2	PRA1 family protein A2	LOC_Os01g62890	prenylated rab acceptor
TraesCS1B02G394500	7.11975	0.000240578	0.00154283	Up	AT3G18280		Bifunctional inhibitor/lipid-transfer protein/seed storage 2S albumin superfamily protein	LOC_Os05g47700	LTPL152 - Protease inhibitor/seed storage/LTP family protein precursor
TraesCS6B02G404800	7.11965	7.32814e-06	7.36514e-05	Up				LOC_Os02g55920	expressed protein
TraesCS5B02G507600	7.11645	7.40025e-06	7.42501e-05	Up	AT1G14870	PCR2	Protein PLANT CADMIUM RESISTANCE 2	LOC_Os03g61470	uncharacterized Cys-rich domain containing protein
TraesCS6B02G213600	7.11633	0.00211955	0.00985032	Up	AT5G26150		protein kinase family protein	LOC_Os02g12660	protein kinase domain containing protein
TraesCS1A02G374300	7.11417	2.78794e-05	0.00023827	Up	AT3G18280		Bifunctional inhibitor/lipid-transfer protein/seed storage 2S albumin superfamily protein	LOC_Os05g47700	LTPL152 - Protease inhibitor/seed storage/LTP family protein precursor
TraesCS5A02G209700	7.11308	1.03091e-06	1.29131e-05	Up	AT5G21940		unknown protein%3B BEST Arabidopsis thaliana protein match is: unknown protein (TAIR:AT3G43850.1)%3B Has 30201 Blast hits to 17322 proteins in 780 species: Archae - 12%3B Bacteria - 1396%3B Metazoa - 17338%3B Fungi - 3422%3B Plants - 5037%3B Viruses - 0%3B Other Eu /.../es - 2996 (source: NCBI BLink).	LOC_Os08g35630	MTD1
TraesCS6D02G188000	7.1112	0.00491772	0.019748	Up	AT1G12350	PPCS1	Phosphopantothenate--cysteine ligase 1	LOC_Os02g36550	phosphopantothenate--cysteine ligase
TraesCS6A02G348400	7.11107	1.37684e-59	3.18172e-56	Up	AT2G41190		Transmembrane amino acid transporter family protein	LOC_Os02g54730	transmembrane amino acid transporter protein
TraesCS4D02G205700	7.11071	0.000152979	0.00104237	Up	AT2G36660	PAB7	Polyadenylate-binding protein 7	LOC_Os03g17030	polyadenylate-binding protein
TraesCS3D02G523200	7.10819	5.17678e-20	5.60548e-18	Up	AT1G65960	GAD2	Glutamate decarboxylase 2	LOC_Os04g37460	glutamate decarboxylase
TraesCS2D02G507900	7.10694	3.50502e-19	3.49933e-17	Up	AT4G21585	ENDO4	Endonuclease 4	LOC_Os04g55850	nuclease PA3
TraesCS1D02G281100	7.10654	0.000183371	0.00121699	Up	AT5G02050		Mitochondrial glycoprotein family protein	LOC_Os05g38210	mitochondrial glycoprotein
TraesCS5D02G137600	7.10549	3.26007e-05	0.000273657	Up	AT5G22580		Uncharacterized protein At5g22580	LOC_Os11g05290	stress responsive A/B Barrel domain containing protein
TraesCS5B02G070300	7.10079	0.000141839	0.000977456	Up				LOC_Os12g40330	expressed protein
TraesCS7D02G467200	7.09858	0.0151894	0.0493868	Up	AT1G46912		F-box associated ubiquitination effector family protein	LOC_Os05g07950	OsFBX160 - F-box domain containing protein
TraesCS1A02G248700	7.09778	7.40549e-15	4.08643e-13	Up	AT3G06390		CASP-like protein 1D2	LOC_Os07g26110	membrane associated DUF588 domain containing protein
TraesCS3B02G178200	7.0968	3.5571e-11	1.10138e-09	Up	AT1G64110		P-loop containing nucleoside triphosphate hydrolases superfamily protein	LOC_Os01g12660	AAA-type ATPase family protein
TraesCS1D02G272600	7.0966	0.000155466	0.00105675	Up	AT5G64750	ABR1	Ethylene-responsive transcription factor ABR1	LOC_Os05g36100	AP2 domain containing protein
TraesCS2B02G443400	7.09619	0.000989248	0.00516432	Up	AT4G04220	AtRLP46	receptor like protein 46	LOC_Os02g06600	receptor-like protein kinase 2 precursor
TraesCS7A02G226900	7.09482	4.96522e-06	5.2045e-05	Up	AT5G06760	LEA4-5	Late Embryogenesis Abundant 4-5	LOC_Os06g21910	late embryogenesis abundant group 1
TraesCS7B02G249600	7.09468	5.36658e-07	7.17053e-06	Up				LOC_Os10g04380	expressed protein
TraesCS5A02G159900	7.09405	3.02846e-62	8.96671e-59	Up
TraesCS2A02G468500	7.09358	5.64131e-11	1.68716e-09	Up				LOC_Os04g53300	polyphenol oxidase
TraesCS2D02G030400	7.09104	1.15543e-05	0.000110056	Up	AT1G26540		Agenet domain-containing protein	LOC_Os11g19730	expressed protein
TraesCS5B02G256600	7.09091	1.26378e-05	0.000119083	Up	AT1G22380	UGT85A3	UDP-glycosyltransferase 85A3	LOC_Os02g51910	cytokinin-O-glucosyltransferase 2
TraesCS3D02G186900	7.09037	3.66359e-05	0.00030244	Up				LOC_Os01g16140	expressed protein
TraesCS6D02G296900	7.08858	3.25975e-06	3.58168e-05	Up	AT1G22380	UGT85A3	UDP-glycosyltransferase 85A3	LOC_Os04g25970	cytokinin-O-glucosyltransferase 2
TraesCS2B02G146300	7.08753	4.32726e-05	0.00035006	Up				LOC_Os07g36880	expressed protein
TraesCS1B02G326900	7.08715	6.72898e-05	0.000512907	Up	AT3G22840	ELIP1	Early light-induced protein 1%2C chloroplastic	LOC_Os07g08160	early light-induced protein
TraesCS1D02G028000	7.08668	0.000158388	0.00107351	Up	AT2G38870		Serine protease inhibitor%2C potato inhibitor I-type family protein	LOC_Os12g25090	expressed protein
TraesCS2B02G539200	7.08547	2.69085e-05	0.000231373	Up	AT3G47110		Putative receptor-like protein kinase At3g47110	LOC_Os01g05960	receptor kinase
TraesCS1D02G202700	7.08353	1.60921e-06	1.91781e-05	Up	AT3G51670	PATL6	Patellin-6	LOC_Os05g27820	patellin protein
TraesCS4A02G421100	7.08204	2.60419e-05	0.000225002	Up	AT2G46770	NAC043	NAC domain-containing protein 43	LOC_Os06g04090	no apical meristem protein
TraesCS2D02G571600	7.07543	0.000205824	0.00134443	Up	AT3G12500	CHI-B	Basic endochitinase B	LOC_Os05g33140	CHIT5 - Chitinase family protein precursor
TraesCS3B02G020400	7.07392	0.000104307	0.000750395	Up	AT2G45730		eukaryotic initiation factor 3 gamma subunit family protein	LOC_Os04g02150	tRNA methyltransferase
TraesCS2A02G319200	7.07208	0.00102871	0.00534411	Up	AT1G22360	UGT85A2	UDP-glycosyltransferase 85A2	LOC_Os02g36840	cytokinin-O-glucosyltransferase 2
TraesCS2B02G286900	7.06924	8.81496e-06	8.66102e-05	Up	AT5G59080		unknown protein%3B FUNCTIONS IN: molecular_function unknown%3B INVOLVED IN: response to oxidative stress%3B LOCATED IN: chloroplast%3B EXPRESSED IN: 18 plant structures%3B EXPRESSED DURING: 9 growth stages%3B BEST Arabidopsis thaliana protein match is: unknown /.../n (TAIR:AT3G46880.1)%3B Has 1807 Blast hits to 1807 proteins in 277 species: Archae - 0%3B Bacteria - 0%3B Metazoa - 736%3B Fungi - 3…	LOC_Os05g38040	expressed protein
TraesCS4A02G053000	7.06578	0.000451673	0.00264815	Up	AT4G31690	REM9	B3 domain-containing protein REM9	LOC_Os03g11370	B3 DNA binding domain containing protein
TraesCS7A02G059500	7.05946	0.000396935	0.00236841	Up	AT2G20340	ELI5	Tyrosine decarboxylase 1	LOC_Os08g04540	decarboxylase
TraesCS3A02G182400	7.05916	1.68568e-05	0.000153421	Up				LOC_Os01g16140	expressed protein
TraesCS7A02G154500	7.05905	5.57819e-16	3.68044e-14	Up	AT4G36670	PLT6	Probable polyol transporter 6	LOC_Os10g21590	transporter family protein
TraesCS2B02G441600	7.05509	8.25385e-05	0.000612964	Up	AT5G24600		Protein of unknown function%2C DUF599	LOC_Os08g05780	expressed protein
TraesCSU02G100700	7.05423	0.00866277	0.0313579	Up	AT2G19130		G-type lectin S-receptor-like serine/threonine-protein kinase At2g19130	LOC_Os04g34290	protein kinase
TraesCS5B02G443000	7.05132	3.66628e-05	0.000302636	Up	AT3G19690		CAP (Cysteine-rich secretory proteins%2C Antigen 5%2C and Pathogenesis-related 1 protein) superfamily protein	LOC_Os07g03710	SCP-like extracellular protein
TraesCS1B02G419300	7.0477	2.39854e-06	2.73765e-05	Up	AT1G73500	MKK9	Mitogen-activated protein kinase kinase 9	LOC_Os01g42400	STE_MEK_ste7_MAP2K.3 - STE kinases include homologs to sterile 7
TraesCS2B02G434300	7.04671	1.43017e-06	1.72725e-05	Up	AT2G44940	ERF034	Ethylene-responsive transcription factor ERF034	LOC_Os04g46400	AP2 domain containing protein
TraesCS6A02G106000	7.04583	0.00604586	0.02337	Up	AT2G21045	STR19	Rhodanese-like domain-containing protein 19%2C mitochondrial	LOC_Os02g01220	rhodanese-like domain containing protein
TraesCS1D02G230200	7.04315	0.001374	0.0068279	Up	AT3G06840		unknown protein%3B BEST Arabidopsis thaliana protein match is: unknown protein (TAIR:AT5G49170.1)%3B Has 33 Blast hits to 33 proteins in 9 species: Archae - 0%3B Bacteria - 0%3B Metazoa - 0%3B Fungi - 0%3B Plants - 33%3B Viruses - 0%3B Other Eukaryotes - 0 (source: /.../BLink).	LOC_Os05g29080	expressed protein
TraesCS7B02G474000	7.04269	4.68726e-08	7.94027e-07	Up	AT4G16770		2-oxoglutarate (2OG) and Fe(II)-dependent oxygenase superfamily protein	LOC_Os10g37899	transposon protein
TraesCS4D02G075000	7.04078	1.30515e-06	1.59045e-05	Up	AT1G67590		Remorin family protein	LOC_Os03g02840	remorin family protein
TraesCS7D02G445200	7.03922	2.10976e-12	8.10591e-11	Up	AT3G25950		TRAM%2C LAG1 and CLN8 (TLC) lipid-sensing domain containing protein	LOC_Os12g13940	DNA-binding storekeeper protein-related
TraesCS1D02G256700	7.03771	6.94387e-16	4.50311e-14	Up	AT1G68570	NPF3.1	Protein NRT1/ PTR FAMILY 3.1	LOC_Os05g33960	peptide transporter PTR2
TraesCS1B02G461700	7.03736	0.000218764	0.0014184	Up	AT5G24130		unknown protein%3B FUNCTIONS IN: molecular_function unknown%3B INVOLVED IN: biological_process unknown%3B LOCATED IN: mitochondrion%3B EXPRESSED IN: petal%2C leaf whorl%2C flower%3B EXPRESSED DURING: 4 anthesis%2C petal differentiation and expansion stage%3B Has 1807 /.../ hits to 1807 proteins in 277 species: Archae - 0%3B Bacteria - 0%3B Metazoa - 736%3B Fungi - 347%3B Plants - 385%3B Viruses -…	LOC_Os05g50940	expressed protein
TraesCS3B02G171700	7.03673	0.000360763	0.00218283	Up				LOC_Os01g12110	expressed protein
TraesCS7D02G176000	7.03527	1.18073e-05	0.000112139	Up	AT1G76690	OPR2	12-oxophytodienoate reductase 2	LOC_Os06g11290	12-oxophytodienoate reductase
TraesCS2D02G598900	7.03458	1.29378e-05	0.000121523	Up	AT1G61720	BAN	Anthocyanidin reductase	LOC_Os04g53920	leucoanthocyanidin reductase
TraesCS5B02G467100	7.03198	6.0813e-05	0.000471097	Up
TraesCS1D02G165700	7.02869	0.000299894	0.00186515	Up
TraesCS4A02G283100	7.02622	3.16649e-05	0.000266775	Up	AT5G62670	AHA11	ATPase 11%2C plasma membrane-type	LOC_Os12g44150	plasma membrane ATPase
TraesCS3D02G300400	7.02572	0.0014234	0.00703834	Up	AT1G26640		Amino acid kinase family protein	LOC_Os01g55890	amino acid kinase
TraesCS3B02G059600	7.02355	0.00437935	0.0180097	Up	AT3G18270	CYP77A5P	cytochrome P450%2C family 77%2C subfamily A%2C polypeptide 5 pseudogene	LOC_Os01g04630	muconate cycloisomerase
TraesCS1A02G110400	7.02167	2.32855e-05	0.000203844	Up	AT2G40200	BHLH51	Transcription factor bHLH51	LOC_Os01g06640	basic helix-loop-helix
TraesCS6D02G297100	7.02026	0.00326784	0.0141402	Up	AT1G22370	UGT85A5	UDP-glycosyltransferase 85A5	LOC_Os02g51900	cytokinin-O-glucosyltransferase 2
TraesCS4B02G376200	7.02007	0.000358444	0.00217101	Up	AT4G21200	GA2OX8	Gibberellin 2-beta-dioxygenase 8	LOC_Os04g44150	gibberellin 2-beta-dioxygenase 7
TraesCS5B02G218200	7.01463	0.00118228	0.00601366	Up	AT3G22840	ELIP1	Early light-induced protein 1%2C chloroplastic	LOC_Os07g08160	early light-induced protein
TraesCS5D02G479400	7.01345	1.86287e-14	9.66061e-13	Up				LOC_Os01g04040	BBTI11 - Bowman-Birk type bran trypsin inhibitor precursor
TraesCS1B02G220900	7.01047	0.00178365	0.00851612	Up	AT5G41790	CIP1	COP1-interactive protein 1	LOC_Os03g01710	expressed protein
TraesCS6A02G141600	7.00477	4.62743e-15	2.63955e-13	Up	AT1G06660	JASON	Protein JASON	LOC_Os02g07180	expressed protein
TraesCS5B02G366600	6.99901	0.000196419	0.00129056	Up	AT1G79480		Carbohydrate-binding X8 domain superfamily protein	LOC_Os09g38784	retrotransposon protein
TraesCS4A02G305700	6.99594	0.000247794	0.00158257	Up	AT1G35710		Probable leucine-rich repeat receptor-like protein kinase At1g35710	LOC_Os10g03050	leucine-rich repeat receptor protein kinase EXS precursor
TraesCS3D02G265500	6.99546	2.45946e-12	9.35088e-11	Up	AT5G22610		F-box/RNI-like/FBD-like domains-containing protein	LOC_Os11g33190	OsFBX422 - F-box domain containing protein
TraesCS4B02G072300	6.99431	7.97792e-06	7.93488e-05	Up	AT4G34380		Transducin/WD40 repeat-like superfamily protein	LOC_Os03g42710	WD-40 repeat family protein
TraesCS6D02G000400	6.99376	9.96443e-06	9.66513e-05	Up	AT3G02100	UGT83A1	UDP-glycosyltransferase 83A1	LOC_Os03g55030	UDP-glucoronosyl and UDP-glucosyl transferase domain containing protein
TraesCS6D02G343600	6.9932	8.7969e-05	0.000647607	Up	AT5G19000	BPM1	BTB/POZ and MATH domain-containing protein 1	LOC_Os10g29100	MBTB44 - Bric-a-Brac
TraesCS7D02G226200	6.9904	2.6636e-06	2.99828e-05	Up	AT5G55470	NHX4	Sodium/hydrogen exchanger 4	LOC_Os06g21360	transporter
TraesCS5D02G362100	6.98826	9.31985e-05	0.000681657	Up	AT1G20823	ATL80	RING-H2 finger protein ATL80	LOC_Os09g38110	RING-H2 finger protein
TraesCS1D02G163800	6.98768	1.00312e-12	4.04179e-11	Up	AT5G52300	LTI65	Low-temperature-induced 65 kDa protein	LOC_Os10g36180	expressed protein
TraesCS1D02G230300	6.98583	1.97973e-39	1.2422e-36	Up	AT1G53820	ATL60	RING-H2 finger protein ATL60	LOC_Os05g29676	RING-H2 finger protein
TraesCS7D02G477100	6.98372	5.49098e-05	0.000430348	Up				LOC_Os06g45040	B-box zinc finger family protein
TraesCS7A02G367700	6.9824	0.000457223	0.00267639	Up	AT3G47750	ATATH3	ATP binding cassette subfamily A4	LOC_Os06g38950	ABC transporter
TraesCS1D02G312600	6.98159	1.17807e-09	2.75056e-08	Up	AT2G41540	GPDHC1	Glycerol-3-phosphate dehydrogenase	LOC_Os05g41590	glycerol-3-phosphate dehydrogenase
TraesCS5B02G037600	6.98131	7.82555e-06	7.7997e-05	Up
TraesCS2D02G384400	6.97934	0.000164505	0.00110862	Up
TraesCS6B02G383200	6.97534	5.29376e-05	0.000416688	Up
TraesCS1A02G392200	6.97379	0.000235113	0.00151229	Up	AT3G14880		BEST Arabidopsis thaliana protein match is: transcription factor-related (TAIR:AT4G18650.1)%3B Has 560 Blast hits to 560 proteins in 40 species: Archae - 0%3B Bacteria - 0%3B Metazoa - 2%3B Fungi - 0%3B Plants - 558%3B Viruses - 0%3B Other Eukaryotes - 0 (source: /.../BLink).	LOC_Os05g48650	transcription factor HBP-1b
TraesCS1D02G334700	6.96844	0.00015229	0.00103872	Up				LOC_Os05g43640	retrotransposon
TraesCS6B02G288500	6.96797	2.24857e-26	4.70293e-24	Up	AT5G17300	RVE1	Protein REVEILLE 1	LOC_Os02g46030	MYB family transcription factor
TraesCS1B02G429400	6.96789	0.00296372	0.0130338	Up	AT1G06475		unknown protein%3B Has 35333 Blast hits to 34131 proteins in 2444 species: Archae - 798%3B Bacteria - 22429%3B Metazoa - 974%3B Fungi - 991%3B Plants - 531%3B Viruses - 0%3B Other Eukaryotes - 9610 (source: NCBI BLink).	LOC_Os05g49080	expressed protein
TraesCS5A02G460600	6.96675	1.5388e-05	0.000141644	Up	AT1G75150		unknown protein%3B Has 38228 Blast hits to 24529 proteins in 1168 species: Archae - 169%3B Bacteria - 4103%3B Metazoa - 14594%3B Fungi - 5866%3B Plants - 1861%3B Viruses - 317%3B Other Eukaryotes - 11318 (source: NCBI BLink).	LOC_Os03g59480	expressed protein
TraesCS3D02G364800	6.96662	0.000379072	0.00227616	Up	AT3G20880	WIP4	Zinc finger protein WIP4	LOC_Os01g63980	ZOS1-17 - C2H2 zinc finger protein
TraesCS5A02G460500	6.96501	1.28954e-05	0.00012121	Up	AT5G55050		GDSL esterase/lipase At5g55050	LOC_Os03g38470	GDSL-like lipase/acylhydrolase
TraesCS3D02G159200	6.96463	9.09945e-31	2.99353e-28	Up	AT1G64110		P-loop containing nucleoside triphosphate hydrolases superfamily protein	LOC_Os05g50750	AAA family ATPase
TraesCS5D02G529300	6.96041	0.0120701	0.0410671	Up				LOC_Os06g13750	expressed protein
TraesCS3D02G042100	6.95974	0.00905158	0.0324763	Up	AT1G03670		ankyrin repeat family protein	LOC_Os11g24780	expressed protein
TraesCS5A02G314600	6.95899	0.00123631	0.00624655	Up	AT2G47520	ERF071	Ethylene-responsive transcription factor ERF071	LOC_Os01g21120	AP2 domain containing protein
TraesCS7D02G295800	6.95819	0.00127856	0.00642168	Up	AT3G43430		RING/U-box superfamily protein	LOC_Os08g06090	zinc finger
TraesCS3B02G259200	6.95761	2.5986e-05	0.000224601	Up	AT1G70420		Protein of unknown function (DUF1645)	LOC_Os01g45250	DUF1645 domain containing protein
TraesCS6D02G162600	6.95387	0.000462897	0.00270626	Up
TraesCS5A02G384100	6.95284	0.00061242	0.0034261	Up	AT3G63310	BIL4	Bax inhibitor-1 family protein	LOC_Os03g53400	transmembrane BAX inhibitor motif-containing protein
TraesCS7A02G330000	6.95095	0.00470484	0.0190677	Up	AT1G48100		Polygalacturonase At1g48100	LOC_Os05g20020	polygalacturonase
TraesCS7A02G233700	6.94705	0.00408069	0.0169757	Up	AT1G10710	PHS1	poor homologous synapsis 1	LOC_Os06g27860	poor homologous synapsis 1 protein
TraesCS4B02G183900	6.94523	1.0091e-05	9.77225e-05	Up	AT1G56430	NAS4	Probable nicotianamine synthase 4	LOC_Os03g19420	nicotianamine synthase
TraesCS2A02G218000	6.94512	0.000337846	0.00206409	Up	AT2G03200		Eukaryotic aspartyl protease family protein	LOC_Os07g34870	aspartic proteinase nepenthesin precursor
TraesCS1B02G183100	6.94496	5.14455e-14	2.50991e-12	Up	AT2G15220		Plant basic secretory protein (BSP) family protein	LOC_Os10g34920	secretory protein
TraesCS3D02G300600	6.94478	0.000470748	0.00274691	Up	AT2G23170	GH3.3	Indole-3-acetic acid-amido synthetase GH3.3	LOC_Os07g40290	OsGH3.8 - Probable indole-3-acetic acid-amido synthetase
TraesCS5D02G035000	6.94327	7.02567e-05	0.000532779	Up	AT2G02360	PP2B10	F-box protein PP2-B10	LOC_Os02g56840	OsFBX70 - F-box domain containing protein
TraesCS3D02G350100	6.94022	0.00134099	0.00668211	Up	AT2G28710		C2H2-type zinc finger family protein	LOC_Os01g62130	ZOS1-14 - C2H2 zinc finger protein
TraesCS1B02G470600	6.93971	7.35515e-06	7.3868e-05	Up	AT3G14470	RPPL1	Putative disease resistance RPP13-like protein 1	LOC_Os11g10550	NBS-LRR disease resistance protein
TraesCS3D02G370200	6.93946	2.36007e-05	0.000206299	Up	AT3G10910	ATL72	RING-H2 finger protein ATL72	LOC_Os01g64620	zinc finger
TraesCS6A02G410800	6.93611	0.000398589	0.00237768	Up				LOC_Os11g31060	IQ calmodulin-binding and BAG domain containing protein
TraesCS5A02G405200	6.9352	8.12424e-05	0.000604998	Up				LOC_Os03g56010	bZIP transcription factor domain containing protein
TraesCS6D02G148400	6.93417	0.000299975	0.00186549	Up	AT5G15890	TBL21	Protein trichome birefringence-like 21	LOC_Os02g49650	leaf senescence related protein
TraesCS4D02G236400	6.93362	2.79467e-29	7.97542e-27	Up	AT1G70440	SRO3	Probable inactive poly	LOC_Os03g12820	ATP8
TraesCS7D02G052600	6.93192	0.00334093	0.0144006	Up	AT4G25480	DREB1A	Dehydration-responsive element-binding protein 1A	LOC_Os06g03670	dehydration-responsive element-binding protein
TraesCS2D02G285300	6.93178	5.46572e-15	3.08064e-13	Up	AT5G13220	TIFY9	Protein TIFY 9	LOC_Os04g32480	zinc-finger protein
TraesCS5A02G286500	6.92849	5.26887e-05	0.000415035	Up	AT1G67370	ASY1	DNA-binding HORMA family protein	LOC_Os09g32930	retrotransposon protein
TraesCS4B02G103100	6.92482	2.12503e-05	0.000188114	Up	AT2G32030		Acyl-CoA N-acyltransferases (NAT) superfamily protein	LOC_Os03g58010	acetyltransferase
TraesCS2A02G219100	6.92464	0.000200746	0.00131498	Up	AT3G21720	ICL	Isocitrate lyase	LOC_Os07g34520	isocitrate lyase
TraesCS7B02G191300	6.92446	2.57e-06	2.90604e-05	Up	AT5G55470	NHX4	Sodium/hydrogen exchanger 4	LOC_Os06g21360	transporter
TraesCS3B02G393300	6.92213	3.19286e-05	0.000268669	Up	AT1G69310	WRKY57	Probable WRKY transcription factor 57	LOC_Os01g62514	WRKY56
TraesCS7A02G149400	6.91241	0.00103513	0.00536865	Up
TraesCS4B02G104200	6.91114	0.0129966	0.043605	Up				LOC_Os12g08700	expressed protein
TraesCS5B02G210100	6.9111	1.39236e-86	1.649e-82	Up	AT1G54100	ALDH7B4	Aldehyde dehydrogenase family 7 member B4	LOC_Os09g26880	aldehyde dehydrogenase
TraesCS3D02G445100	6.90817	1.25436e-06	1.53508e-05	Up	AT3G50150		Plant protein of unknown function (DUF247)	LOC_Os06g33350	plant protein of unknown function domain containing protein
TraesCS3D02G295100	6.90569	8.64064e-09	1.70876e-07	Up	AT2G34140	CDF4	Cyclic dof factor 4	LOC_Os01g55340	dof zinc finger domain containing protein
TraesCS1D02G037200	6.90487	0.00568933	0.0222313	Up	AT1G21240	WAK3	Wall-associated receptor kinase 3	LOC_Os04g43730	OsWAK51 - OsWAK receptor-like protein kinase
TraesCS4B02G203900	6.89925	0.00169242	0.00814539	Up	AT2G33290	SUVH2	Histone-lysine N-methyltransferase family member SUVH2	LOC_Os08g45130	histone-lysine N-methyltransferase
TraesCS2B02G535400	6.89774	2.16777e-20	2.47157e-18	Up	AT4G21585	ENDO4	Endonuclease 4	LOC_Os04g55850	nuclease PA3
TraesCS2A02G541000	6.88927	0.000877484	0.00466832	Up	AT5G50380	ATEXO70F1	exocyst subunit exo70 family protein F1	LOC_Os05g30640	leucine zipper protein-like
TraesCS6B02G238800	6.88802	0.000492668	0.00285355	Up	AT5G50200	NRT3.1	High-affinity nitrate transporter 3.1	LOC_Os04g40410	high affinity nitrate transporter
TraesCS5B02G150800	6.88465	0.000438263	0.00258039	Up	AT2G30130	LBD12	LOB domain-containing protein 12	LOC_Os05g27980	DUF260 domain containing protein
TraesCS4B02G262700	6.88355	0.000410213	0.00243751	Up	AT2G18540		RmlC-like cupins superfamily protein	LOC_Os03g10110	cupin domain containing protein
TraesCS5A02G129100	6.88215	1.18818e-05	0.000112756	Up	AT3G52780	PAP20	Probable purple acid phosphatase 20	LOC_Os11g05410	Ser/Thr protein phosphatase family protein
TraesCS3A02G025300	6.88104	5.5539e-15	3.12476e-13	Up	AT3G26430		GDSL esterase/lipase At3g26430	LOC_Os07g39740	GDSL-like lipase/acylhydrolase
TraesCS3B02G009600	6.87667	0.00016865	0.0011327	Up
TraesCS5B02G390800	6.86783	0.00014941	0.00102121	Up				LOC_Os03g53620	late embryogenesis abundant protein D-34
TraesCS5D02G098100	6.86767	5.98757e-23	9.26957e-21	Up				LOC_Os05g10420	expressed protein
TraesCS6A02G100100	6.86452	7.50146e-05	0.000564119	Up
TraesCS4A02G308900	6.86379	4.29575e-05	0.000347897	Up	AT2G36750	UGT73C1	UDP-glycosyltransferase 73C1	LOC_Os02g11700	cytokinin-O-glucosyltransferase 3
TraesCS3B02G210400	6.8607	0.000111153	0.000793621	Up
TraesCS7A02G193300	6.86051	0.000318354	0.00196129	Up	AT1G24095		Putative thiol-disulphide oxidoreductase DCC	LOC_Os06g13010	retrotransposon protein
TraesCS2B02G535500	6.86015	3.52898e-12	1.29948e-10	Up	AT4G21585	ENDO4	Endonuclease 4	LOC_Os04g55850	nuclease PA3
TraesCS1A02G088300	6.86009	1.78312e-16	1.24682e-14	Up	AT5G48930	HST	Shikimate O-hydroxycinnamoyltransferase	LOC_Os10g23820	transferase family protein
TraesCS1B02G436500	6.85745	6.45885e-42	4.70731e-39	Up	AT4G22220	ISU1	Iron-sulfur cluster assembly protein 1	LOC_Os05g49300	iron-sulfur cluster assembly enzyme ISCU
TraesCS1D02G290000	6.85055	1.74465e-05	0.000158105	Up	AT1G07660		Histone H4	LOC_Os05g39050	Core histone H2A/H2B/H3/H4 domain containing protein
TraesCS7A02G325700	6.85008	2.94739e-05	0.000250182	Up	AT3G12960		unknown protein%3B Has 44 Blast hits to 44 proteins in 14 species: Archae - 0%3B Bacteria - 0%3B Metazoa - 0%3B Fungi - 0%3B Plants - 44%3B Viruses - 0%3B Other Eukaryotes - 0 (source: NCBI BLink).	LOC_Os08g01370	expressed protein
TraesCS5A02G294500	6.84989	0.00454745	0.018572	Up	AT5G47920		unknown protein%3B BEST Arabidopsis thaliana protein match is: unknown protein (TAIR:AT5G13880.1)%3B Has 1807 Blast hits to 1807 proteins in 277 species: Archae - 0%3B Bacteria - 0%3B Metazoa - 736%3B Fungi - 347%3B Plants - 385%3B Viruses - 0%3B Other Eukaryotes - /.../source: NCBI BLink).	LOC_Os09g33650	expressed protein
TraesCS3A02G149100	6.84743	4.07e-05	0.000331399	Up	AT5G53280	PDV1	Plastid division protein PDV1	LOC_Os01g12460	expressed protein
TraesCS5B02G122500	6.84636	8.899e-05	0.000654108	Up	AT5G13150	ATEXO70C1	exocyst subunit exo70 family protein C1	LOC_Os12g06840	ATEXO70C2
TraesCS7A02G255700	6.84625	0.000184083	0.00122111	Up	AT3G07390	AIR12	auxin-responsive family protein	LOC_Os08g41290	AIR12
TraesCS6A02G324500	6.84484	7.74533e-05	0.000579698	Up	AT1G73360	HDG11	Homeobox-leucine zipper protein HDG11	LOC_Os06g10600	homeobox and START domains containing protein
TraesCS3B02G290300	6.8442	3.59962e-22	5.12087e-20	Up	AT2G47000	ABCB4	ABC transporter B family member 4	LOC_Os01g50160	MDR-like ABC transporter
TraesCS5D02G224200	6.84265	2.13038e-05	0.000188569	Up	AT1G17290	ALAAT1	Alanine aminotransferase 1%2C mitochondrial	LOC_Os09g26380	aminotransferase
TraesCSU02G068400	6.84117	0.0121499	0.0412926	Up	AT3G13770	PCMP-H85	Putative pentatricopeptide repeat-containing protein At3g13770%2C mitochondrial	LOC_Os11g05980	tetratricopeptide-like helical
TraesCS5D02G030700	6.8376	1.01241e-07	1.59153e-06	Up	AT5G17860	CCX1	Cation/calcium exchanger 1	LOC_Os12g42910	sodium/calcium exchanger protein
TraesCS3A02G528900	6.83729	1.07628e-71	5.99843e-68	Up	AT4G32940	GAMMA-VPE	Vacuolar-processing enzyme gamma-isozyme	LOC_Os01g37910	vacuolar-processing enzyme precursor
TraesCS5A02G213500	6.83675	0.000142127	0.000979057	Up	AT1G17750	PEPR2	Leucine-rich repeat receptor-like protein kinase PEPR2	LOC_Os10g06760	receptor-like protein kinase precursor
TraesCS3A02G287800	6.83553	8.58351e-05	0.000634116	Up	AT1G01300		Eukaryotic aspartyl protease family protein	LOC_Os01g52190	aspartic proteinase nepenthesin precursor
TraesCS1D02G269600	6.83502	1.44172e-15	8.83553e-14	Up	AT1G22540	NPF5.10	Protein NRT1/ PTR FAMILY 5.10	LOC_Os05g35594	peptide transporter
TraesCS4D02G212300	6.83125	0.000322022	0.0019808	Up	AT3G46230	HSP17.4A	17.4 kDa class I heat shock protein	LOC_Os03g15960	hsp20/alpha crystallin family protein
TraesCS1B02G381500	6.82836	2.60445e-17	2.05292e-15	Up	AT1G52690		Late embryogenesis abundant protein (LEA) family protein	LOC_Os05g46480	late embryogenesis abundant protein
TraesCS7D02G279500	6.82592	1.16757e-05	0.000110989	Up	AT2G36690		2-oxoglutarate (2OG) and Fe(II)-dependent oxygenase superfamily protein	LOC_Os08g44590	gibberellin 20 oxidase 2
TraesCS1A02G368500	6.82537	5.18648e-05	0.000408953	Up	AT1G02520	ABCB11	ABC transporter B family member 11	LOC_Os01g50100	ABC transporter
TraesCS1A02G141000	6.82463	0.00421792	0.0174565	Up	AT2G01710		Chaperone DnaJ-domain superfamily protein	LOC_Os10g23230	AT hook-containing MAR binding 1
TraesCS1A02G199700	6.82019	1.56861e-13	7.1144e-12	Up
TraesCS5D02G403700	6.81379	1.30538e-12	5.17702e-11	Up	AT3G02100	UGT83A1	UDP-glycosyltransferase 83A1	LOC_Os03g55010	UDP-glucoronosyl and UDP-glucosyl transferase domain containing protein
TraesCS7D02G168600	6.81207	1.07333e-14	5.7945e-13	Up	AT4G18930		Cyclic phosphodiesterase	LOC_Os05g44170	cyclic phosphodiesterase
TraesCSU02G122100	6.81037	2.18072e-17	1.74064e-15	Up	AT3G55710	UGT76F2	UDP-glycosyltransferase 76F2	LOC_Os03g60960	cytokinin-N-glucosyltransferase 1
TraesCS2B02G276100	6.80643	0.000414361	0.00245722	Up	AT1G76600		unknown protein%3B FUNCTIONS IN: molecular_function unknown%3B INVOLVED IN: N-terminal protein myristoylation%3B LOCATED IN: nucleolus%2C nucleus%3B EXPRESSED IN: 24 plant structures%3B EXPRESSED DURING: 15 growth stages%3B BEST Arabidopsis thaliana protein match /.../nknown protein (TAIR:AT1G21010.1)%3B Has 220 Blast hits to 220 proteins in 14 species: Archae - 0%3B Bacteria - 0%3B Metazoa - 0%3…	LOC_Os07g03120	expressed protein
TraesCS5B02G249400	6.8054	0.000272938	0.00171872	Up
TraesCS3A02G215400	6.80253	1.64365e-14	8.65161e-13	Up	AT1G17710		Inorganic pyrophosphatase 2	LOC_Os01g41660	phosphoethanolamine/phosphocholine phosphatase
TraesCS4D02G078800	6.79659	0.000159207	0.00107775	Up	AT5G66870	LBD36	LOB domain-containing protein 36	LOC_Os03g41600	DUF260 domain containing protein
TraesCS1B02G446700	6.7942	5.05696e-30	1.55057e-27	Up	AT3G27930		unknown protein%3B FUNCTIONS IN: molecular_function unknown%3B INVOLVED IN: N-terminal protein myristoylation%3B LOCATED IN: cellular_component unknown%3B EXPRESSED IN: 23 plant structures%3B EXPRESSED DURING: 14 growth stages%3B Has 35 Blast hits to 35 protein /.../2 species: Archae - 0%3B Bacteria - 0%3B Metazoa - 0%3B Fungi - 0%3B Plants - 35%3B Viruses - 0%3B Other Eukaryotes - 0 (source: NCB…	LOC_Os05g50200	expressed protein
TraesCS5B02G203000	6.79299	0.000140433	0.000969365	Up				LOC_Os09g23590	expressed protein
TraesCS4D02G063100	6.78777	4.68433e-05	0.000374407	Up				LOC_Os11g26570	dehydrin
TraesCS7A02G146000	6.78761	0.0015589	0.0076016	Up	AT5G11000		Plant protein of unknown function (DUF868)	LOC_Os06g08350	expressed protein
TraesCS1D02G360300	6.78587	0.00303383	0.0132922	Up	AT1G34300		G-type lectin S-receptor-like serine/threonine-protein kinase At1g34300	LOC_Os01g47900	S-locus-like receptor protein kinase
TraesCS4D02G050700	6.78237	2.85497e-30	8.98661e-28	Up	AT3G17800		Protein of unknown function (DUF760)	LOC_Os03g50870	expressed protein
TraesCS2A02G433500	6.78148	1.63257e-21	2.15731e-19	Up	AT5G57540	XTH13	Putative xyloglucan endotransglucosylase/hydrolase protein 13	LOC_Os04g51520	glycosyl hydrolases family 16
TraesCS3D02G234400	6.77953	9.8581e-35	4.38505e-32	Up	AT1G15520	ABCG40	ABC transporter G family member 40	LOC_Os07g33780	pleiotropic drug resistance protein 5
TraesCS3D02G320500	6.77868	2.3448e-06	2.68148e-05	Up	AT1G60420		Probable nucleoredoxin 1	LOC_Os01g58194	protein disulfide isomerase
TraesCS3B02G040900	6.77852	1.58633e-33	6.5347e-31	Up	AT1G16310	MTP10	Metal tolerance protein 10	LOC_Os01g03914	cation efflux family protein
TraesCS4B02G304300	6.77728	1.01104e-23	1.68351e-21	Up	AT5G65380		MATE efflux family protein	LOC_Os03g08900	MATE efflux family protein
TraesCS1B02G444600	6.77664	0.00056339	0.00319637	Up	AT1G52820		2-oxoglutarate (2OG) and Fe(II)-dependent oxygenase superfamily protein	LOC_Os05g50090	oxidoreductase
TraesCS1B02G275300	6.7736	0.000690032	0.00379486	Up	AT5G24960	CYP71A14	Cytochrome P450 71A14	LOC_Os05g35010	cytochrome P450
TraesCS5B02G239000	6.77057	0.0142417	0.0469029	Up	AT4G28330		unknown protein%3B BEST Arabidopsis thaliana protein match is: unknown protein (TAIR:AT4G28340.1)%3B Has 48 Blast hits to 48 proteins in 10 species: Archae - 0%3B Bacteria - 0%3B Metazoa - 0%3B Fungi - 0%3B Plants - 48%3B Viruses - 0%3B Other Eukaryotes - 0 (source /.../ BLink).	LOC_Os12g19860	expressed protein
TraesCS2B02G402400	6.77011	0.000777941	0.00420917	Up	AT4G16480	INT4	Inositol transporter 4	LOC_Os04g43210	transporter family protein
TraesCS3B02G478300	6.76457	0.000924819	0.00488041	Up	AT2G22880		VQ motif-containing protein	LOC_Os03g47280	VQ domain containing protein
TraesCS4A02G347600	6.75975	0.00135685	0.00675093	Up	AT1G21230	WAK5	Wall-associated receptor kinase 5	ChrUn.fgenesh.mRNA	expressed protein
TraesCS6B02G370000	6.75531	8.74168e-21	1.04973e-18	Up	AT3G14067		Subtilase family protein	LOC_Os02g53860	OsSub22 - Putative Subtilisin homologue
TraesCS4B02G288300	6.75369	6.01357e-05	0.000466521	Up				LOC_Os03g07590	expressed protein
TraesCS5D02G543500	6.75095	0.00290147	0.0128005	Up	AT1G61370		G-type lectin S-receptor-like serine/threonine-protein kinase At1g61370	LOC_Os11g39420	jacalin-like lectin domain containing protein
TraesCS5D02G419200	6.74922	7.90971e-21	9.55884e-19	Up	AT3G21670	NPF6.4	Protein NRT1/ PTR FAMILY 6.4	LOC_Os04g39030	peptide transporter PTR2
TraesCS5B02G292900	6.74885	1.10935e-05	0.000106216	Up				LOC_Os09g33650	expressed protein
TraesCS2B02G499500	6.74853	0.0001619	0.00109364	Up	AT3G05200	ATL6	E3 ubiquitin-protein ligase ATL6	LOC_Os02g15120	RING-H2 finger protein
TraesCS7B02G058500	6.74665	8.07679e-08	1.29828e-06	Up	AT4G36670	PLT6	Probable polyol transporter 6	LOC_Os10g21590	transporter family protein
TraesCS1A02G414200	6.74601	0.00100117	0.00522082	Up	AT4G29110		unknown protein%3B FUNCTIONS IN: molecular_function unknown%3B INVOLVED IN: response to chitin%3B LOCATED IN: vacuole%3B BEST Arabidopsis thaliana protein match is: unknown protein (TAIR:AT1G52140.1)%3B Has 109 Blast hits to 109 proteins in 16 species: Archae /.../Bacteria - 0%3B Metazoa - 0%3B Fungi - 0%3B Plants - 109%3B Viruses - 0%3B Other Eukaryotes - 0 (source: NCBI BLink).	LOC_Os02g13600	expressed protein
TraesCS7A02G351200	6.74444	0.000337871	0.00206409	Up				LOC_Os04g01950	legume lectins beta domain containing protein
TraesCS1B02G276800	6.74026	1.8711e-50	2.08564e-47	Up				LOC_Os01g04050	BBTI12 - Bowman-Birk type bran trypsin inhibitor precursor
TraesCS7D02G070200	6.73915	6.08602e-05	0.000471369	Up	AT2G27830		unknown protein%3B BEST Arabidopsis thaliana protein match is: unknown protein (TAIR:AT4G22758.1)%3B Has 131 Blast hits to 131 proteins in 17 species: Archae - 0%3B Bacteria - 0%3B Metazoa - 0%3B Fungi - 0%3B Plants - 131%3B Viruses - 0%3B Other Eukaryotes - 0 (sou /.../CBI BLink).	LOC_Os06g04480	expressed protein
TraesCS5A02G018600	6.73798	0.00103068	0.0053523	Up	AT4G11650	OSM34	Osmotin-like protein OSM34	LOC_Os12g43440	thaumatin
TraesCS3B02G088800	6.73748	0.00020383	0.00133316	Up	AT3G62160		HXXXD-type acyl-transferase family protein	LOC_Os04g11810	transferase family protein
TraesCS3A02G363700	6.72943	3.09375e-118	1.4656e-113	Up	AT2G39800	P5CSA	Delta-1-pyrroline-5-carboxylate synthase A	LOC_Os01g62900	amino acid kinase
TraesCS2D02G419600	6.72929	7.92935e-05	0.000592114	Up	AT5G24600		Protein of unknown function%2C DUF599	LOC_Os08g05780	expressed protein
TraesCS2B02G219900	6.72851	0.000107134	0.000767986	Up	AT3G54940		Papain family cysteine protease	LOC_Os07g29760	cysteine proteinase A494 precursor
TraesCS3B02G297400	6.72849	0.00743368	0.0276017	Up	AT2G01275		RING/FYVE/PHD zinc finger superfamily protein	LOC_Os01g49280	zinc finger family protein
TraesCS1D02G386100	6.72795	0.000188596	0.00124633	Up	AT5G51600	MAP65-3	65-kDa microtubule-associated protein 3	LOC_Os01g49200	microtubule associated protein
TraesCS1A02G351000	6.72777	1.25534e-17	1.03515e-15	Up	AT2G34340		Protein of unknown function%2C DUF584	LOC_Os05g45450	DUF584 domain containing protein
TraesCS5B02G340200	6.72617	0.00198692	0.00932542	Up	AT1G48120		Serine/threonine-protein phosphatase 7 long form homolog	LOC_Os01g51130	transposon protein
TraesCS5D02G325900	6.7245	3.04941e-21	3.84713e-19	Up	AT4G22920	SGR1	Protein STAY-GREEN 1%2C chloroplastic	LOC_Os09g36200	senescence-inducible chloroplast stay-green protein 1
TraesCS6D02G193100	6.7214	7.58885e-05	0.000569741	Up	AT5G50200	NRT3.1	High-affinity nitrate transporter 3.1	LOC_Os04g40410	high affinity nitrate transporter
TraesCS1A02G283100	6.72138	4.50808e-18	3.97323e-16	Up	AT3G11430	GPAT5	Glycerol-3-phosphate acyltransferase 5	LOC_Os05g38350	glycerol-3-phosphate acyltransferase 8
TraesCS2B02G052600	6.71725	2.15866e-05	0.000190803	Up	AT4G19970		CONTAINS InterPro DOMAIN/s: Nucleotide-diphospho-sugar transferase%2C predicted (InterPro:IPR005069)%3B BEST Arabidopsis thaliana protein match is: Nucleotide-diphospho-sugar transferase family protein (TAIR:AT5G44820.1)%3B Has 801 Blast hits to 466 prote /.../ 35 species: Archae - 0%3B Bacteria - 0%3B Metazoa - 2%3B Fungi - 0%3B Plants - 750%3B Viruses - 0%3B Other Eukaryotes - 49 (source: NCBI …	LOC_Os07g19444	regulatory protein
TraesCS7B02G383000	6.71326	0.00058139	0.00327864	Up	AT5G07740	FH20	Formin-like protein 20	LOC_Os03g14615	LTPL117 - Protease inhibitor/seed storage/LTP family protein precursor
TraesCS3B02G403100	6.7118	5.70014e-14	2.76107e-12	Up	AT1G51940	LYK3	LysM domain receptor-like kinase 3	LOC_Os01g36550	protein kinase family protein
TraesCS3B02G409700	6.71022	3.0681e-05	0.00025929	Up	AT3G10910	ATL72	RING-H2 finger protein ATL72	LOC_Os05g36310	zinc finger
TraesCS2A02G444000	6.70887	1.53105e-12	6.00915e-11	Up	AT1G67510		Leucine-rich repeat protein kinase family protein	LOC_Os12g13300	expressed protein
TraesCS3A02G487300	6.70657	0.00827828	0.0301783	Up
TraesCS1D02G331700	6.70614	0.000289552	0.00180914	Up	AT4G21070	BRCA1	Protein BREAST CANCER SUSCEPTIBILITY 1 homolog	LOC_Os05g43610	ATBARD1/BARD1
TraesCS4B02G169700	6.70516	7.91585e-06	7.88058e-05	Up	AT2G28490		RmlC-like cupins superfamily protein	LOC_Os03g21790	cupin domain containing protein
TraesCS1B02G380400	6.70127	0.000177205	0.00118136	Up	AT5G39510	VTI11	Vesicle transport v-SNARE 11	LOC_Os01g51120	vesicle transport v-SNARE protein
TraesCS5B02G148300	6.70056	1.93948e-17	1.55595e-15	Up	AT1G05675	UGT74E1	UDP-glycosyltransferase 74E1	LOC_Os04g12970	UDP-glucoronosyl/UDP-glucosyl transferase
TraesCS5D02G558900	6.70007	2.04499e-05	0.000181895	Up	AT1G04560		AWPM-19-like family protein	LOC_Os07g24000	AWPM-19-like membrane family protein
TraesCS1A02G072700	6.69961	0.00146071	0.00719683	Up	AT1G23380	KNAT6	Homeobox protein knotted-1-like 6	LOC_Os05g03884	homeobox protein knotted-1-like 6
TraesCS5D02G476200	6.69914	3.22226e-17	2.50821e-15	Up	AT5G49690	UGT91C1	UDP-glycosyltransferase 91C1	LOC_Os06g11270	anthocyanidin 3-O-glucosyltransferase
TraesCS2D02G275700	6.69847	0.00178036	0.00850385	Up				LOC_Os02g35810	expressed protein
TraesCS1A02G228500	6.69643	1.27922e-38	7.52799e-36	Up	AT1G53820	ATL60	RING-H2 finger protein ATL60	LOC_Os05g29676	RING-H2 finger protein
TraesCS4A02G102800	6.6926	2.22963e-05	0.000196273	Up				LOC_Os11g41560	OsFBX427 - F-box domain containing protein
TraesCS5B02G089000	6.69171	0.00107656	0.00555191	Up	AT4G29990		Leucine-rich repeat transmembrane protein kinase protein	LOC_Os12g37980	protein kinase domain containing protein
TraesCS6A02G282800	6.6889	0.000133629	0.000928553	Up	AT5G55230	MAP65-1	65-kDa microtubule-associated protein 1	LOC_Os02g48830	microtubule associated protein
TraesCS6A02G108800	6.6854	4.52342e-05	0.000363734	Up	AT3G13040		myb-like HTH transcriptional regulator family protein	LOC_Os02g04640	Myb-like DNA-binding domain containing protein
TraesCS6A02G134500	6.68423	0.000323798	0.00198979	Up	AT4G10270		Wound-responsive family protein	LOC_Os02g06560	wound induced protein
TraesCS7B02G347000	6.68283	1.8145e-36	9.24281e-34	Up	AT5G04220	SYT3	Synaptotagmin-3	LOC_Os09g36770	NTMC2Type1.2 protein
TraesCS2B02G545200	6.68102	0.00509415	0.0203127	Up	AT2G20340	ELI5	Tyrosine decarboxylase 1	LOC_Os08g04540	decarboxylase
TraesCS4D02G126900	6.67772	1.95442e-15	1.1787e-13	Up	AT4G00340	RLK4	receptor-like protein kinase 4	LOC_Os12g03650	D-mannose binding lectin family protein
TraesCS3D02G246400	6.67745	0.011834	0.0403987	Up
TraesCS2A02G276000	6.67614	6.70095e-13	2.77729e-11	Up	AT5G59730	ATEXO70H7	exocyst subunit exo70 family protein H7	LOC_Os12g01040	exo70 exocyst complex subunit domain containing protein
TraesCS7B02G272500	6.67226	8.4598e-10	2.04212e-08	Up	AT3G24520	HSFC1	Heat stress transcription factor C-1	LOC_Os06g35960	HSF-type DNA-binding domain containing protein
TraesCS5B02G155500	6.67222	0.0151858	0.0493804	Up	AT3G53480	ABCG37	ABC transporter G family member 37	LOC_Os12g13720	Plant PDR ABC transporter associated domain containing protein
TraesCS2A02G074400	6.66855	0.00836413	0.0304409	Up				LOC_Os03g46510	OsFBX103 - F-box domain containing protein
TraesCS1D02G442000	6.66554	0.0108984	0.0377711	Up	AT1G56260		unknown protein%3B Has 32 Blast hits to 32 proteins in 16 species: Archae - 0%3B Bacteria - 0%3B Metazoa - 2%3B Fungi - 0%3B Plants - 28%3B Viruses - 0%3B Other Eukaryotes - 2 (source: NCBI BLink).
TraesCS7A02G372300	6.66519	0.00033874	0.00206806	Up	AT2G16280	KCS9	3-ketoacyl-CoA synthase 9	LOC_Os05g49290	3-ketoacyl-CoA synthase
TraesCS5D02G250600	6.66486	4.5151e-05	0.00036324	Up	AT1G05510		Protein of unknown function (DUF1264)	LOC_Os05g49440	DUF1264 domain containing protein
TraesCS7B02G356500	6.66381	1.11815e-05	0.000106934	Up	AT2G19130		G-type lectin S-receptor-like serine/threonine-protein kinase At2g19130	LOC_Os07g36780	S-domain receptor-like protein kinase
TraesCS6D02G278200	6.66363	0.000128818	0.000899609	Up	AT5G13930	CHS	Chalcone synthase	LOC_Os07g17010	chalcone synthase
TraesCS5D02G494100	6.65592	0.00346507	0.0148405	Up	AT3G44326		F-box protein At3g44326	LOC_Os02g33240	OsFBX51 - F-box domain containing protein
TraesCS1A02G143600	6.65544	0.00130543	0.00653273	Up	AT3G53190		Probable pectate lyase 12	LOC_Os10g31910	pectate lyase precursor
TraesCS3D02G363900	6.65215	0.0098686	0.0348127	Up	AT1G64310	PCMP-E65	Putative pentatricopeptide repeat-containing protein At1g64310	LOC_Os01g36540	pentatricopeptide
TraesCS1B02G199600	6.65195	4.93562e-11	1.48974e-09	Up	AT1G64660	MGL	Methionine gamma-lyase	LOC_Os10g37340	cystathionine gamma-synthase
TraesCS7B02G273600	6.64894	2.20663e-10	5.92938e-09	Up	AT5G44410		FAD-binding Berberine family protein	LOC_Os06g35650	reticuline oxidase-like protein precursor
TraesCS5D02G399500	6.64594	0.00379332	0.015994	Up	AT3G58450		Adenine nucleotide alpha hydrolases-like superfamily protein	LOC_Os03g53900	universal stress protein domain containing protein
TraesCS3B02G206900	6.64579	0.00445992	0.0182784	Up	AT5G63370	CDKG1	Cyclin-dependent kinase G1	LOC_Os06g47880	cell division control protein 2 homolog 3
TraesCS3B02G501300	6.64434	0.000304661	0.00188984	Up				LOC_Os02g29150	OsFBO11 - F-box and other domain containing protein
TraesCS1D02G200200	6.64255	0.000934633	0.00492397	Up	AT4G19010	4CLL6	4-coumarate--CoA ligase-like 6	LOC_Os10g42800	AMP-binding enzyme
TraesCS7B02G337300	6.64152	0.000409468	0.00243384	Up	AT3G62730		unknown protein%3B FUNCTIONS IN: molecular_function unknown%3B INVOLVED IN: biological_process unknown%3B LOCATED IN: endomembrane system%3B EXPRESSED IN: 13 plant structures%3B EXPRESSED DURING: LP.04 four leaves visible%2C 4 anthesis%2C LP.02 two leaves visible /.../l differentiation and expansion stage%3B BEST Arabidopsis thaliana protein match is: unknown protein (TAIR:AT1G47980.1)%3B Has 172…	LOC_Os03g22470	desiccation-related protein PCC13-62 precursor
TraesCS5B02G186400	6.64052	0.000119822	0.000845697	Up	AT1G51800		Leucine-rich repeat protein kinase family protein	LOC_Os09g18260	senescence-induced receptor-like serine/threonine-protein kinase precursor
TraesCS6D02G331400	6.64035	1.80629e-51	2.19408e-48	Up	AT2G41190		Transmembrane amino acid transporter family protein	LOC_Os02g54730	transmembrane amino acid transporter protein
TraesCS6B02G284300	6.6338	0.00159083	0.00772955	Up	AT2G46680	ATHB-7	Homeobox-leucine zipper protein ATHB-7	LOC_Os02g43330	homeobox associated leucine zipper
TraesCS7B02G193900	6.63338	0.000172917	0.00115693	Up	AT4G12050	AHL26	AT-hook motif nuclear-localized protein 26	LOC_Os06g22100	DNA binding protein
TraesCS3D02G431600	6.62845	0.000155396	0.00105641	Up	AT3G60310		unknown protein%3B Has 22 Blast hits to 18 proteins in 9 species: Archae - 0%3B Bacteria - 0%3B Metazoa - 0%3B Fungi - 0%3B Plants - 22%3B Viruses - 0%3B Other Eukaryotes - 0 (source: NCBI BLink).	LOC_Os06g05640	expressed protein
TraesCS2D02G320600	6.62365	0.000195499	0.00128541	Up	AT3G51550	FER	Receptor-like protein kinase FERONIA	LOC_Os04g49690	FERONIA receptor-like kinase
TraesCS4A02G003700	6.62075	0.00509715	0.0203196	Up				LOC_Os08g37690	expressed protein
TraesCS2B02G359400	6.61932	2.14739e-05	0.000189915	Up	AT3G48360	BT2	BTB/POZ and TAZ domain-containing protein 2	LOC_Os04g40630	BTBZ4 - Bric-a-Brac
TraesCS2D02G090600	6.61227	0.00844625	0.0307008	Up	AT1G55540	NUP214	Nuclear pore complex protein NUP214
TraesCS5D02G374100	6.61048	0.0020128	0.00943071	Up	AT1G79480		Carbohydrate-binding X8 domain superfamily protein	LOC_Os09g38784	retrotransposon protein
TraesCS3A02G491500	6.60985	1.78642e-19	1.82979e-17	Up	AT5G12330	LRP1	Protein LATERAL ROOT PRIMORDIUM 1	LOC_Os01g72490	LRP1
TraesCS7D02G388100	6.60898	0.00181259	0.00863079	Up	AT4G31690	REM9	B3 domain-containing protein REM9	LOC_Os06g42630	B3 DNA binding domain containing protein
TraesCS7B02G096600	6.60835	0.00111202	0.00570726	Up	AT3G28150	AXY4L	Protein ALTERED XYLOGLUCAN 4-like	LOC_Os06g12820	proteins of unknown function domain containing protein
TraesCS3A02G225300	6.60257	0.000790909	0.0042708	Up				LOC_Os01g43510	expressed protein
TraesCS4D02G063400	6.6023	0.000159021	0.00107665	Up				LOC_Os03g52370	PIII4 - Proteinase inhibitor II family protein precursor
TraesCS4B02G104100	6.60223	0.000139415	0.00096339	Up	AT4G33467		unknown protein%3B Has 25 Blast hits to 25 proteins in 9 species: Archae - 0%3B Bacteria - 0%3B Metazoa - 0%3B Fungi - 0%3B Plants - 25%3B Viruses - 0%3B Other Eukaryotes - 0 (source: NCBI BLink).	LOC_Os12g08700	expressed protein
TraesCS5B02G178100	6.6	8.15232e-06	8.08372e-05	Up	AT3G02875	ILR1	IAA-amino acid hydrolase ILR1	LOC_Os07g14590	hydrolase
TraesCS4A02G266900	6.59432	1.34776e-29	3.94119e-27	Up	AT5G16570	GLN1-4	Glutamine synthetase cytosolic isozyme 1-4	LOC_Os03g50490	glutamine synthetase
TraesCS2A02G382700	6.5943	9.20481e-21	1.10395e-18	Up	AT1G08630	THA1	Probable low-specificity L-threonine aldolase 1	LOC_Os04g43650	L-allo-threonine aldolase
TraesCS2D02G010900	6.59285	0.000267188	0.00168722	Up	AT1G35710		Probable leucine-rich repeat receptor-like protein kinase At1g35710	LOC_Os02g34790	receptor-like protein kinase 5 precursor
TraesCS5A02G238000	6.59209	1.07319e-14	5.7945e-13	Up	AT3G19270	CYP707A4	Abscisic acid 8'-hydroxylase 4	LOC_Os09g28390	cytochrome P450
TraesCS7B02G215700	6.58745	0.000323222	0.00198674	Up	AT1G12420	ACR8	ACT domain-containing protein ACR8	LOC_Os03g14370	ACT domain containing protein
TraesCS1D02G344900	6.58578	3.84694e-14	1.91028e-12	Up	AT4G13180		NAD(P)-binding Rossmann-fold superfamily protein	LOC_Os10g31780	oxidoreductase
TraesCS4B02G335300	6.58466	1.69198e-06	2.00561e-05	Up	AT4G25310		2-oxoglutarate (2OG) and Fe(II)-dependent oxygenase superfamily protein	LOC_Os03g63900	1-aminocyclopropane-1-carboxylate oxidase 2
TraesCS5D02G362200	6.57851	1.60167e-15	9.77783e-14	Up	AT2G17270	MPT1	Mitochondrial phosphate carrier protein 1%2C mitochondrial	LOC_Os09g38100	phosphate carrier protein
TraesCS7D02G390100	6.57659	0.00600106	0.0232309	Up	AT5G66580		unknown protein%3B FUNCTIONS IN: molecular_function unknown%3B INVOLVED IN: N-terminal protein myristoylation%3B LOCATED IN: cellular_component unknown%3B BEST Arabidopsis thaliana protein match is: unknown protein (TAIR:AT3G50800.1)%3B Has 1807 Blast hits to /.../proteins in 277 species: Archae - 0%3B Bacteria - 0%3B Metazoa - 736%3B Fungi - 347%3B Plants - 385%3B Viruses - 0%3B Other Eukaryotes…	LOC_Os06g41940	expressed protein
TraesCS2B02G598600	6.57244	0.000841922	0.00450571	Up	AT1G63220		C2 domain-containing protein At1g63220	LOC_Os04g58570	C2 domain containing protein
TraesCS2B02G323600	6.57184	0.0120881	0.0411135	Up	AT1G49780	PUB26	U-box domain-containing protein 26	LOC_Os04g35680	U-box domain containing protein
TraesCS6D02G068700	6.56749	0.000292626	0.00182558	Up	AT1G23780	SKIP22	F-box protein SKIP22	LOC_Os10g04020	OsFBX356 - F-box domain containing protein
TraesCS5B02G529100	6.56418	9.05349e-05	0.000664535	Up	AT4G37070	PLP1	Patatin-like protein 1	LOC_Os11g39990	patatin
TraesCS7D02G058600	6.56396	0.000399963	0.00238543	Up
TraesCS7D02G312200	6.56266	0.00210075	0.00977929	Up	AT1G12420	ACR8	ACT domain-containing protein ACR8	LOC_Os03g14370	ACT domain containing protein
TraesCS1A02G232200	6.56244	0.000305306	0.00189335	Up	AT4G01410		Late embryogenesis abundant (LEA) hydroxyproline-rich glycoprotein family	LOC_Os05g30490	harpin-induced protein 1 domain containing protein
TraesCS3A02G133900	6.56135	0.00072025	0.00394159	Up	AT1G07660		Histone H4	LOC_Os05g39050	Core histone H2A/H2B/H3/H4 domain containing protein
TraesCS7D02G460300	6.55846	4.95172e-05	0.000393389	Up	AT1G73010	PS2	Inorganic pyrophosphatase 1	LOC_Os02g13290	phosphoethanolamine/phosphocholine phosphatase
TraesCS6B02G225200	6.55797	1.11636e-11	3.78971e-10	Up	AT1G14130		2-oxoglutarate (2OG) and Fe(II)-dependent oxygenase superfamily protein	LOC_Os04g39980	gibberellin 20 oxidase 2
TraesCS3D02G333800	6.55734	0.000230696	0.00148671	Up	AT1G09575		Calcium uniporter protein 6%2C mitochondrial	LOC_Os01g60110	E2F-related protein
TraesCS6A02G014800	6.55713	0.000242876	0.00155536	Up	AT1G12300		Pentatricopeptide repeat-containing protein At1g12300%2C mitochondrial	LOC_Os10g35436	Rf1
TraesCS1A02G107700	6.55413	0.00467625	0.0189815	Up	AT5G52660	RVE6	Protein REVEILLE 6	LOC_Os05g07010	myb-like DNA-binding domain containing protein
TraesCS5D02G394700	6.55215	0.000908262	0.00480723	Up	AT4G14819		Protein of unknown function (DUF1677)	LOC_Os03g53540	expressed protein
TraesCS2B02G367000	6.55209	0.000678558	0.00374283	Up	AT1G77380	AAP3	Amino acid permease 3	LOC_Os11g09020	amino acid transporter
TraesCS5A02G370900	6.55043	0.00571249	0.0223052	Up	AT5G51330	DYAD	Protein DYAD	LOC_Os03g44760	SWI1
TraesCS1B02G378400	6.54852	0.000480162	0.00279358	Up	AT1G09200	HTR2	Histone H3.2	LOC_Os01g64640	histone H3
TraesCS1D02G272000	6.54735	0.00131188	0.00656018	Up
TraesCS4A02G278000	6.54647	0.000806832	0.00434468	Up
TraesCS1A02G414000	6.54497	3.02856e-10	7.90916e-09	Up	AT2G25625		unknown protein%3B FUNCTIONS IN: molecular_function unknown%3B INVOLVED IN: biological_process unknown%3B LOCATED IN: chloroplast%3B EXPRESSED IN: 10 plant structures%3B EXPRESSED DURING: LP.06 six leaves visible%2C LP.04 four leaves visible%2C 4 anthesis%2C petal /.../entiation and expansion stage%3B Has 24 Blast hits to 24 proteins in 9 species: Archae - 0%3B Bacteria - 0%3B Metazoa - 0%3B Fung…	LOC_Os05g49940	expressed protein
TraesCS6B02G106200	6.54469	0.000901792	0.00477912	Up	AT2G15480	UGT73B5	UDP-glycosyltransferase 73B5	LOC_Os01g41430	UDP-glucoronosyl and UDP-glucosyl transferase
TraesCS4A02G187600	6.54372	2.80276e-69	1.39763e-65	Up	AT5G13750	ZIFL1	Protein ZINC INDUCED FACILITATOR-LIKE 1	LOC_Os11g04104	major facilitator superfamily antiporter
TraesCS2A02G433600	6.54239	0.000238979	0.00153403	Up	AT3G23730	XTH16	Probable xyloglucan endotransglucosylase/hydrolase protein 16	LOC_Os08g13980	glycosyl hydrolases family 16
TraesCS7A02G336900	6.54177	1.35559e-07	2.07356e-06	Up	AT3G53440		Homeodomain-like superfamily protein	LOC_Os01g40000	expressed protein
TraesCS1D02G072700	6.53838	0.00385941	0.0162207	Up	AT3G11180		2-oxoglutarate (2OG) and Fe(II)-dependent oxygenase superfamily protein	LOC_Os05g03640	flavonol synthase/flavanone 3-hydroxylase
TraesCS1A02G295800	6.53753	4.47832e-12	1.62381e-10	Up	AT5G01300		PEBP (phosphatidylethanolamine-binding protein) family protein	LOC_Os05g39250	phosphatidylethanolamine-binding protein
TraesCS2B02G289800	6.5366	5.78766e-05	0.000450841	Up	AT3G02550	LBD41	LOB domain-containing protein 41	LOC_Os01g32770	DUF260 domain containing protein
TraesCS3B02G176200	6.53608	0.000200635	0.00131452	Up	AT4G23750	CRF2	Ethylene-responsive transcription factor CRF2	LOC_Os01g12440	AP2 domain containing protein
TraesCS2B02G322100	6.53428	0.000133559	0.000928136	Up	AT1G72100		late embryogenesis abundant domain-containing protein / LEA domain-containing protein	LOC_Os04g35490	expressed protein
TraesCS7A02G150700	6.53407	0.000906287	0.00479892	Up	AT2G24130		Putative leucine-rich repeat receptor-like serine/threonine-protein kinase At2g24130	LOC_Os06g08710	receptor-like protein kinase precursor
TraesCS2D02G488000	6.53296	7.62089e-16	4.90195e-14	Up
TraesCS2D02G462100	6.53158	4.90453e-07	6.6119e-06	Up	AT5G46330	FLS2	LRR receptor-like serine/threonine-protein kinase FLS2	LOC_Os04g52780	leucine-rich repeat receptor protein kinase EXS precursor
TraesCS4B02G102900	6.52966	0.000311303	0.00192374	Up	AT1G10330	PCMP-E71	Putative pentatricopeptide repeat-containing protein At1g10330	LOC_Os05g18950	pentatricopeptide
TraesCS5D02G342000	6.52761	0.00853044	0.0309624	Up	AT5G11880	LYSA2	Diaminopimelate decarboxylase 2%2C chloroplastic	LOC_Os09g37120	pyridoxal-dependent decarboxylase protein
TraesCS2A02G493800	6.52673	2.38274e-59	5.37511e-56	Up	AT1G78290	SRK2C	Serine/threonine-protein kinase SRK2C	LOC_Os03g27280	CAMK_CAMK_like.19 - CAMK includes calcium/calmodulin depedent protein kinases
TraesCS4B02G348400	6.52659	0.00109939	0.00565211	Up
TraesCS7D02G037700	6.52593	2.8141e-09	6.10513e-08	Up	AT1G35710		Probable leucine-rich repeat receptor-like protein kinase At1g35710	LOC_Os02g34790	receptor-like protein kinase 5 precursor
TraesCS4A02G440000	6.52063	0.0141513	0.04666	Up				LOC_Os09g39330	retrotransposon protein
TraesCS3A02G508600	6.51899	2.42528e-29	6.98435e-27	Up	AT4G24220	VEP1	3-oxo-Delta(4%2C5)-steroid 5-beta-reductase	LOC_Os03g32170	NAD dependent epimerase/dehydratase family protein
TraesCS4D02G032100	6.51534	0.00067693	0.00373472	Up	AT1G18980		Germin-like protein subfamily T member 2	LOC_Os03g48780	Cupin domain containing protein
TraesCS1B02G380200	6.51329	0.00449354	0.0183935	Up	AT1G07660		Histone H4	LOC_Os05g39050	Core histone H2A/H2B/H3/H4 domain containing protein
TraesCS3A02G106600	6.50734	3.56716e-05	0.000295716	Up	AT4G26200	ACS7	1-aminocyclopropane-1-carboxylate synthase 7	LOC_Os01g09700	aminotransferase
TraesCS2D02G073900	6.50613	1.68492e-15	1.02596e-13	Up	AT2G45290	TKL-2	Transketolase-2%2C chloroplastic	LOC_Os04g19740	transketolase
TraesCS3A02G357400	6.50344	0.000709936	0.0038919	Up	AT5G22880	H2B	Histone H2B.10	LOC_Os08g38300	Core histone H2A/H2B/H3/H4 domain containing protein
TraesCS1A02G189300	6.50322	8.57086e-16	5.45369e-14	Up	AT2G36290		alpha/beta-Hydrolases superfamily protein	LOC_Os10g37710	hydrolase
TraesCS3B02G248400	6.50255	6.11466e-34	2.60964e-31	Up	AT1G15520	ABCG40	ABC transporter G family member 40	LOC_Os12g32820	pleiotropic drug resistance protein 3
TraesCS7B02G026300	6.50082	0.000532389	0.00304563	Up	AT4G36930	SPT	Transcription factor SPATULA	LOC_Os06g06900	helix-loop-helix DNA-binding domain containing protein
TraesCS1B02G242800	6.50018	1.28794e-06	1.5719e-05	Up	AT1G53820	ATL60	RING-H2 finger protein ATL60	LOC_Os05g29710	RING-H2 finger protein
TraesCS2B02G205000	6.49963	0.000187681	0.00124107	Up
TraesCS6B02G332700	6.49945	4.46792e-05	0.000359933	Up
TraesCS7D02G212000	6.49862	0.00106775	0.0055146	Up	AT1G10400	UGT90A2	UDP-glycosyltransferase 90A2	LOC_Os06g16000	UDP-glucoronosyl and UDP-glucosyl transferase
TraesCS2D02G306700	6.49515	2.09673e-16	1.45536e-14	Up	AT5G47850	CCR4	Serine/threonine-protein kinase-like protein CCR4	LOC_Os04g35890	TKL_IRAK_CR4L.3 - The CR4L subfamily has homology with Crinkly4
TraesCS5B02G414000	6.49364	4.48656e-31	1.51275e-28	Up	AT3G21670	NPF6.4	Protein NRT1/ PTR FAMILY 6.4	LOC_Os04g39030	peptide transporter PTR2
TraesCS2A02G455600	6.49037	7.43964e-05	0.000560137	Up	AT5G06740	LECRKS5	Probable L-type lectin-domain containing receptor kinase S.5	LOC_Os04g49460	protein kinase domain containing protein
TraesCS3A02G224100	6.48956	0.00256621	0.0115456	Up	AT5G41800		Probable GABA transporter 2	LOC_Os01g43320	transmembrane amino acid transporter protein
TraesCS7B02G142500	6.48819	1.1581e-08	2.22518e-07	Up	AT1G76490	HMG1	hydroxy methylglutaryl CoA reductase 1	LOC_Os08g40180	3-hydroxy-3-methylglutaryl-coenzyme A reductase
TraesCS2A02G584000	6.4861	0.00597686	0.0231571	Up	AT3G28600		P-loop containing nucleoside triphosphate hydrolases superfamily protein	LOC_Os07g09470	ATPase
TraesCS3A02G204700	6.48531	0.00376771	0.015908	Up
TraesCS2B02G220500	6.48513	4.56208e-16	3.05469e-14	Up	AT2G44260		Plant protein of unknown function (DUF946)	LOC_Os07g38840	expressed protein
TraesCS5B02G271000	6.48369	0.000123303	0.000866971	Up	AT2G19130		G-type lectin S-receptor-like serine/threonine-protein kinase At2g19130	LOC_Os01g66680	S-domain receptor-like protein kinase
TraesCS1B02G197900	6.48305	4.81712e-11	1.45583e-09	Up	AT4G24040	TRE1	Trehalase	LOC_Os10g37660	trehalase precursor
TraesCS5D02G567400	6.482	0.00125909	0.00634104	Up
TraesCS1B02G248400	6.48055	7.55601e-11	2.21162e-09	Up	AT5G26830	THRRS	Threonine--tRNA ligase%2C mitochondrial	LOC_Os08g19850	threonyl-tRNA synthetase
TraesCS1D02G248200	6.47831	1.43842e-07	2.19143e-06	Up	AT3G06390		CASP-like protein 1D2	LOC_Os07g26110	membrane associated DUF588 domain containing protein
TraesCS1D02G094800	6.47521	0.00069208	0.00380568	Up	AT3G62760	GSTF13	Glutathione S-transferase F13	LOC_Os01g27210	glutathione S-transferase
TraesCS3A02G425500	6.46822	1.65079e-18	1.53791e-16	Up	AT1G04920	SPS3	Probable sucrose-phosphate synthase 3	LOC_Os01g69030	sucrose-phosphate synthase
TraesCS2A02G338800	6.46816	0.000427902	0.00252787	Up	AT3G28960		Transmembrane amino acid transporter family protein	LOC_Os04g38680	transmembrane amino acid transporter protein
TraesCS3A02G283700	6.46684	5.97122e-15	3.34367e-13	Up	AT2G34340		Protein of unknown function%2C DUF584	LOC_Os01g52740	expressed protein
TraesCS2A02G255400	6.4649	0.00051814	0.00297652	Up	AT2G37960		unknown protein%3B BEST Arabidopsis thaliana protein match is: unknown protein (TAIR:AT3G54060.2)%3B Has 418 Blast hits to 247 proteins in 92 species: Archae - 0%3B Bacteria - 163%3B Metazoa - 49%3B Fungi - 80%3B Plants - 28%3B Viruses - 0%3B Other Eukaryotes - 98 /.../e: NCBI BLink).	ChrSy.fgenesh.mRNA	expressed protein
TraesCS5B02G015500	6.46419	4.4916e-23	7.04572e-21	Up	AT4G11650	OSM34	Osmotin-like protein OSM34	LOC_Os12g43490	thaumatin
TraesCS5A02G460800	6.46075	0.000942555	0.00495992	Up	AT2G35530	bZIP16	basic region/leucine zipper transcription factor 16	LOC_Os07g10890	transcription factor
TraesCS3A02G357500	6.46042	0.000317161	0.00195522	Up	AT5G22880	H2B	Histone H2B.10	LOC_Os08g38300	Core histone H2A/H2B/H3/H4 domain containing protein
TraesCS3B02G343000	6.45912	0.000154728	0.00105277	Up	AT3G63250	HMT-2	Homocysteine S-methyltransferase 2	LOC_Os01g56610	homocysteine S-methyltransferase protein
TraesCS2B02G210900	6.45817	0.00236244	0.0107772	Up	AT3G26770		NAD(P)-binding Rossmann-fold superfamily protein	LOC_Os07g40250	sex determination protein tasselseed-2
TraesCS3D02G031000	6.45801	1.30265e-18	1.23212e-16	Up	AT3G14460		Putative disease resistance protein At3g14460	LOC_Os10g04570	expressed protein
TraesCS6D02G082400	6.45426	1.51777e-12	5.96196e-11	Up	AT1G02970	WEE1	Wee1-like protein kinase	LOC_Os02g04240	wee1-like protein kinase
TraesCS2A02G187400	6.4533	0.000543826	0.00310113	Up	AT3G54940		Papain family cysteine protease	LOC_Os07g29760	cysteine proteinase A494 precursor
TraesCS4B02G024000	6.45026	0.000711998	0.00390162	Up	AT1G48410	AGO1	Protein argonaute 1	LOC_Os03g47820	PINHEAD
TraesCS1B02G407300	6.44717	0.000151826	0.00103623	Up	AT5G45910		GDSL esterase/lipase At5g45910	LOC_Os06g06290	GDSL-like lipase/acylhydrolase
TraesCS2A02G288000	6.44505	2.50061e-10	6.64207e-09	Up	AT5G13330	ERF113	Ethylene-responsive transcription factor ERF113	LOC_Os04g32620	ethylene-responsive transcription factor ERF114
TraesCS2B02G466500	6.4444	0.000773887	0.00418987	Up	AT1G79180	ATMYB63	myb domain protein 63	LOC_Os04g50770	MYB family transcription factor
TraesCS5A02G133900	6.44067	3.87324e-05	0.000317424	Up	AT3G06130		Heavy metal transport/detoxification superfamily protein	LOC_Os12g05040	heavy-metal-associated domain-containing protein
TraesCS4B02G393600	6.43958	0.000985564	0.00514992	Up	AT5G23760		Copper transport protein family	LOC_Os03g02070	heavy-metal-associated domain-containing protein
TraesCS5D02G034600	6.436	0.00210152	0.0097797	Up				LOC_Os09g07160	expressed protein
TraesCS1D02G379700	6.43529	0.00598887	0.0231951	Up	AT5G06710	HAT14	Homeobox-leucine zipper protein HAT14	LOC_Os02g35770	homeobox associated leucine zipper
TraesCS6A02G066200	6.43519	8.63728e-05	0.000637293	Up	AT5G42480	ARC6	Protein ACCUMULATION AND REPLICATION OF CHLOROPLASTS 6%2C chloroplastic	LOC_Os02g03000	division protein
TraesCS2A02G313400	6.43436	9.35938e-11	2.69615e-09	Up	AT4G05490	FBL22	Putative F-box/LRR-repeat protein 22	LOC_Os08g09450	OsFBL41 - F-box domain and LRR containing protein
TraesCS2B02G118200	6.43423	0.0125107	0.0423049	Up	AT5G61430	NAC100	NAC domain-containing protein 100	LOC_Os07g48550	no apical meristem protein
TraesCS4A02G269400	6.43421	1.17577e-10	3.31942e-09	Up	AT2G02850	ARPN	Basic blue protein	LOC_Os03g50160	plastocyanin-like domain containing protein
TraesCS6D02G270000	6.43203	6.48959e-05	0.000497206	Up	AT2G04038	AtbZIP48	basic leucine-zipper 48	LOC_Os02g49560	bZIP transcription factor domain containing protein
TraesCS6D02G295000	6.43101	0.0112893	0.0388767	Up	AT2G32300	UCC1	uclacyanin 1	LOC_Os02g52180	plastocyanin-like domain containing protein
TraesCS7B02G180300	6.42989	0.000326985	0.00200636	Up	AT2G36690		2-oxoglutarate (2OG) and Fe(II)-dependent oxygenase superfamily protein	LOC_Os08g44590	gibberellin 20 oxidase 2
TraesCS6A02G260700	6.42429	0.000230293	0.00148451	Up	AT1G07660		Histone H4	LOC_Os05g39050	Core histone H2A/H2B/H3/H4 domain containing protein
TraesCS5B02G212500	6.42268	1.26333e-09	2.933e-08	Up	AT3G43120		SAUR-like auxin-responsive protein family	LOC_Os09g26610	OsSAUR38 - Auxin-responsive SAUR gene family member
TraesCS1B02G314000	6.42229	3.58861e-09	7.63716e-08	Up	AT2G38640		Protein LURP-one-related 8	LOC_Os05g40630	DUF567 domain containing protein
TraesCS2D02G093000	6.4182	1.4795e-06	1.78003e-05	Up	AT1G56600	GOLS2	Galactinol synthase 2	LOC_Os07g48830	glycosyl transferase 8 domain containing protein
TraesCS6D02G121700	6.41741	0.0144006	0.0473142	Up	AT5G67210	IRX15-L	Protein IRX15-LIKE	LOC_Os02g06380	plant-specific domain TIGR01627 family protein
TraesCS6A02G411600	6.41729	0.00426152	0.0176075	Up				LOC_Os04g53050	disease resistance RPP13-like protein 1
TraesCS1D02G264000	6.41383	0.000284223	0.00178041	Up	AT4G02330	PME41	Probable pectinesterase/pectinesterase inhibitor 41	LOC_Os01g20980	pectinesterase
TraesCS3B02G515100	6.4138	8.32114e-29	2.24614e-26	Up	AT1G03230		Eukaryotic aspartyl protease family protein	LOC_Os01g71090	xylanase inhibitor
TraesCS2D02G547700	6.40849	1.60934e-20	1.86633e-18	Up	AT2G45570	CYP76C2	Cytochrome P450 76C2	LOC_Os10g08474	cytochrome P450
TraesCS5B02G373300	6.4072	0.00158226	0.00769457	Up	AT5G51330	DYAD	Protein DYAD	LOC_Os03g44760	SWI1
TraesCS4A02G105100	6.40336	0.00858645	0.0311364	Up	AT5G18610		Protein kinase superfamily protein	LOC_Os03g17550	serine/threonine-protein kinase
TraesCS4D02G138800	6.40146	0.000748904	0.00407136	Up	ATMG00510	NAD7	NADH dehydrogenase subunit 7	LOC_Os12g33958	NADH-ubiquinone oxidoreductase 49 kDa subunit
TraesCS2B02G373000	6.40017	0.000154984	0.00105413	Up	AT2G24800	PER18	Peroxidase 18	LOC_Os04g42100	retrotransposon protein
TraesCS7B02G146500	6.40003	0.00129423	0.00648663	Up	AT3G20830	UCNL	Serine/threonine-protein kinase UCNL	LOC_Os08g39460	AGC_PVPK_like_CDK8.2 - ACG kinases include homologs to PKA
TraesCS2A02G143100	6.3984	2.48879e-21	3.20385e-19	Up	AT5G23530	CXE18	Probable carboxylesterase 18	LOC_Os07g44910	gibberellin receptor GID1L2
TraesCS4B02G053200	6.39709	0.00363221	0.015444	Up				LOC_Os11g09940	expressed protein
TraesCS7A02G042200	6.39649	2.90861e-18	2.62707e-16	Up	AT1G35710		Probable leucine-rich repeat receptor-like protein kinase At1g35710	LOC_Os02g34790	receptor-like protein kinase 5 precursor
TraesCS5A02G377700	6.39579	0.00170504	0.00819706	Up	AT3G22942	GG2	Guanine nucleotide-binding protein subunit gamma 2	LOC_Os02g04520	AGG2
TraesCS5A02G451400	6.39494	3.91337e-31	1.32755e-28	Up	AT1G74800	B3GALT18	Probable beta-1%2C3-galactosyltransferase 18	LOC_Os03g58900	galactosyltransferase family protein
TraesCS2A02G588300	6.39452	0.00280152	0.0124319	Up	AT3G13790	CWINV1	Beta-fructofuranosidase%2C insoluble isoenzyme CWINV1	LOC_Os09g08072	glycosyl hydrolases
TraesCS5D02G380200	6.39309	1.71106e-55	2.57327e-52	Up	AT2G38920	RF178	Probable E3 ubiquitin-protein ligase BAH1-like	LOC_Os03g44810	expressed protein
TraesCS3B02G112900	6.39221	8.27917e-05	0.000614596	Up	AT2G40550	ETG1	Mini-chromosome maintenance complex-binding protein	LOC_Os01g07260	expressed protein
TraesCS2B02G511300	6.39182	1.97061e-08	3.61416e-07	Up	AT4G21390	B120	G-type lectin S-receptor-like serine/threonine-protein kinase B120	LOC_Os04g54120	serine/threonine-protein kinase receptor precursor
TraesCS3A02G321800	6.39176	0.00170515	0.00819706	Up				LOC_Os01g56690	helix-loop-helix DNA-binding domain containing protein
TraesCS3D02G324800	6.3905	0.000401415	0.00239198	Up	AT5G15100	PIN5	Putative auxin efflux carrier component 5	LOC_Os01g58860	auxin efflux carrier component
TraesCS5A02G377500	6.38961	0.00155668	0.00759199	Up	AT4G14750	IQD19	IQ-domain 19	LOC_Os03g43580	IQ calmodulin-binding motif family protein
TraesCS5B02G183100	6.3891	0.000441228	0.00259656	Up	AT2G16890	UGT90A1	UDP-glycosyltransferase 90A1	LOC_Os09g16030	cytokinin-O-glucosyltransferase 1
TraesCS2B02G416600	6.38777	8.45855e-07	1.0792e-05	Up	AT5G62220	ATGT18	glycosyltransferase 18	LOC_Os06g23420	exostosin family domain containing protein
TraesCS2D02G274400	6.38568	0.00736645	0.0274014	Up
TraesCS4B02G293900	6.38308	1.22369e-05	0.000115754	Up	AT5G21950		alpha/beta-Hydrolases superfamily protein	LOC_Os03g08100	hydrolase
TraesCS7D02G192700	6.38299	0.0128924	0.0433387	Up	AT3G28150	AXY4L	Protein ALTERED XYLOGLUCAN 4-like	LOC_Os06g12820	proteins of unknown function domain containing protein
TraesCS5A02G337400	6.38242	0.000512741	0.00295195	Up	AT3G14390	LYSA1	Diaminopimelate decarboxylase 1%2C chloroplastic	LOC_Os09g37120	pyridoxal-dependent decarboxylase protein
TraesCS5B02G192300	6.38131	0.000301054	0.00187104	Up				LOC_Os12g02170	retrotransposon protein
TraesCS6B02G347500	6.38056	2.331e-05	0.00020404	Up	AT5G10310	EPFL1	EPIDERMAL PATTERNING FACTOR-like protein 1	LOC_Os02g51950	expressed protein
TraesCS3B02G262800	6.37965	3.61389e-11	1.11604e-09	Up	AT2G21820		unknown protein%3B Has 45 Blast hits to 45 proteins in 13 species: Archae - 0%3B Bacteria - 0%3B Metazoa - 0%3B Fungi - 0%3B Plants - 45%3B Viruses - 0%3B Other Eukaryotes - 0 (source: NCBI BLink).	LOC_Os01g46600	seed maturation protein PM41
TraesCS7B02G169200	6.37888	0.000555261	0.00315703	Up	AT3G51060	SRS1	Protein SHI RELATED SEQUENCE 1	LOC_Os08g43410	LRP1
TraesCS4B02G044700	6.37727	2.18669e-12	8.38448e-11	Up	AT2G02850	ARPN	Basic blue protein	LOC_Os03g50160	plastocyanin-like domain containing protein
TraesCS2D02G379000	6.3761	3.14879e-21	3.96723e-19	Up	AT1G08630	THA1	Probable low-specificity L-threonine aldolase 1	LOC_Os04g43650	L-allo-threonine aldolase
TraesCS2D02G270100	6.37592	0.000407527	0.00242398	Up	AT3G02550	LBD41	LOB domain-containing protein 41	LOC_Os01g32770	DUF260 domain containing protein
TraesCS6D02G011400	6.37488	0.00623471	0.0239602	Up	AT1G03670		ankyrin repeat family protein	LOC_Os07g09530	ankyrin repeat family protein
TraesCS5B02G443100	6.37478	0.000118415	0.000837765	Up	AT3G19690		CAP (Cysteine-rich secretory proteins%2C Antigen 5%2C and Pathogenesis-related 1 protein) superfamily protein	LOC_Os07g03710	SCP-like extracellular protein
TraesCS6D02G327200	6.37474	0.00837439	0.03047	Up				LOC_Os07g40160	expressed protein
TraesCS4D02G131100	6.37424	2.58812e-05	0.00022394	Up	AT5G42380	CML37	Calcium-binding protein CML37	LOC_Os11g01390	OsCML25 - Calmodulin-related calcium sensor protein
TraesCS2B02G202000	6.37162	9.06218e-11	2.6185e-09	Up	AT3G29770	MES11	Putative methylesterase 11%2C chloroplastic	LOC_Os07g41230	esterase
TraesCS3B02G228700	6.36878	0.00134547	0.00670161	Up	AT1G70550		Protein of Unknown Function (DUF239)	LOC_Os01g36660	carboxyl-terminal peptidase
TraesCS2B02G428900	6.36663	0.000976813	0.00511095	Up	AT2G29730	UGT71D1	UDP-glycosyltransferase 71D1	LOC_Os04g46980	cis-zeatin O-glucosyltransferase
TraesCS4A02G068100	6.36529	0.00218312	0.0101002	Up	AT1G20880		RNA-binding (RRM/RBD/RNP motifs) family protein	LOC_Os03g14190	RNA recognition motif containing protein
TraesCS3B02G413200	6.36319	1.21465e-18	1.1543e-16	Up	AT3G19640	MRS2-3	Magnesium transporter MRS2-3	LOC_Os01g64890	CorA-like magnesium transporter protein
TraesCS4B02G216900	6.36134	0.000568416	0.00321908	Up	AT1G77740	PIP5K2	Phosphatidylinositol 4-phosphate 5-kinase 2	LOC_Os03g15550	phosphatidylinositol-4-phosphate 5-kinase
TraesCS5D02G302900	6.35952	1.22833e-06	1.50751e-05	Up	AT1G02850	BGLU11	Beta-glucosidase 11	LOC_Os09g33680	Os9bglu31 - beta-glucosidase
TraesCS6A02G058300	6.35914	0.000131055	0.000913148	Up	AT3G09220	LAC7	Laccase-7	LOC_Os10g20610	laccase-15 precursor
TraesCS2B02G560900	6.35697	0.00459443	0.0187244	Up	AT4G10270		Wound-responsive family protein	LOC_Os04g54240	wound induced protein
TraesCS5D02G143608	6.35643	0.00669958	0.0253964	Up
TraesCS4A02G098200	6.3558	0.000388261	0.00232427	Up	AT3G09440	HSP70-3	Heat shock 70 kDa protein 3	LOC_Os03g16860	DnaK family protein
TraesCS3D02G252200	6.35295	0.000132582	0.00092236	Up	AT3G62160		HXXXD-type acyl-transferase family protein	LOC_Os05g19910	transferase family protein
TraesCSU02G032600	6.35294	1.94961e-05	0.000174328	Up	AT5G23760		Copper transport protein family	LOC_Os03g02070	heavy-metal-associated domain-containing protein
TraesCS3B02G135300	6.35006	0.00783793	0.0288416	Up	AT4G39410	WRKY13	Probable WRKY transcription factor 13	LOC_Os01g08710	WRKY102
TraesCS5D02G001700	6.34768	0.014191	0.0467684	Up	AT1G65680	EXPB2	Putative expansin-B2	LOC_Os03g01640	expansin precursor
TraesCS2D02G502600	6.34487	0.000183661	0.00121874	Up	AT4G37520	PER50	Peroxidase 50	LOC_Os04g56180	peroxidase precursor
TraesCS2D02G336400	6.32896	0.0049116	0.0197293	Up	AT1G25580	NAC008	NAC domain-containing protein 8	LOC_Os02g38130	no apical meristem protein
TraesCS1A02G267800	6.32716	7.81713e-10	1.89908e-08	Up	AT1G44760		Adenine nucleotide alpha hydrolases-like superfamily protein	LOC_Os05g35380	universal stress protein domain containing protein
TraesCS2A02G045400	6.32628	2.08614e-05	0.000185121	Up	AT3G62760	GSTF13	Glutathione S-transferase F13	LOC_Os01g27360	glutathione S-transferase
TraesCS1D02G027900	6.32303	0.000386801	0.0023167	Up	AT2G38870		Serine protease inhibitor%2C potato inhibitor I-type family protein	LOC_Os12g36210	inhibitor I family protein
TraesCS1B02G283100	6.32228	0.000362036	0.00218913	Up
TraesCS7B02G269700	6.31592	3.82764e-58	6.97411e-55	Up	AT3G21250	ABCC8	ABC transporter C family member 8	LOC_Os06g36650	ABC transporter family protein
TraesCS1A02G125900	6.31552	7.2306e-09	1.45296e-07	Up	AT4G32870		Polyketide cyclase/dehydrase and lipid transport superfamily protein	LOC_Os05g11250	lachrymatory factor synthase
TraesCS5A02G298300	6.31032	0.00327343	0.0141599	Up	AT5G61290		Flavin-containing monooxygenase FMO GS-OX-like 8	LOC_Os07g02140	flavin-containing monooxygenase family protein
TraesCS1D02G213300	6.30991	0.000818687	0.00440024	Up	AT4G12510		Bifunctional inhibitor/lipid-transfer protein/seed storage 2S albumin superfamily protein	LOC_Os10g40530	LTPL146 - Protease inhibitor/seed storage/LTP family protein precursor
TraesCS2D02G438000	6.30883	5.23193e-10	1.31382e-08	Up	AT3G05550		Hypoxia-responsive family protein	LOC_Os02g37930	hypoxia-responsive family protein
TraesCS3B02G306900	6.30792	0.00175285	0.00839063	Up	AT5G53870	ENODL1	early nodulin-like protein 1	LOC_Os01g54430	plastocyanin-like domain containing protein
TraesCS7D02G383300	6.30776	1.96262e-11	6.36599e-10	Up	AT5G39120		Germin-like protein subfamily 1 member 15	LOC_Os08g08980	cupin domain containing protein
TraesCS2B02G407600	6.3069	1.0981e-15	6.86738e-14	Up	AT2G46680	ATHB-7	Homeobox-leucine zipper protein ATHB-7	LOC_Os04g45810	homeobox associated leucine zipper
TraesCS6B02G333800	6.3069	0.0012906	0.00647255	Up	AT5G66390	PER72	Peroxidase 72	LOC_Os01g36240	peroxidase precursor
TraesCS7A02G348100	6.30638	1.60828e-10	4.44511e-09	Up	AT4G40070	ATL32	RING-H2 finger protein ATL32	LOC_Os06g34400	zinc finger
TraesCS2B02G539000	6.30531	0.000571959	0.00323527	Up				LOC_Os08g32120	expressed protein
TraesCS4A02G345800	6.30513	0.00269716	0.0120483	Up
TraesCS7B02G164100	6.30478	0.000894856	0.00474794	Up
TraesCS4A02G231200	6.30414	0.000420783	0.00249063	Up	AT5G60920	COB	Protein COBRA	LOC_Os05g32110	COBRA
TraesCS1D02G449300	6.29982	0.00202669	0.00948624	Up	AT2G34930		disease resistance family protein / LRR family protein	LOC_Os01g41930	leucine rich repeat protein
TraesCS4A02G000600	6.29365	0.000113887	0.000809839	Up	AT1G78970	LUP1	Lupeol synthase 1	LOC_Os11g18366	cycloartenol synthase
TraesCS7B02G304800	6.29243	0.00911918	0.0326743	Up	AT5G35670	iqd33	IQ-domain 33	LOC_Os06g40850	IQ calmodulin-binding motif family protein
TraesCS2A02G179300	6.29131	0.000336491	0.00205699	Up	AT5G09530		hydroxyproline-rich glycoprotein family protein	LOC_Os07g40850	retrotransposon protein
TraesCS4D02G095900	6.28501	0.00523165	0.0207683	Up	AT1G69640	SBH1	Sphinganine C(4)-monooxygenase 1	LOC_Os06g22490	sphingolipid C4-hydroxylase SUR2
TraesCS5B02G285800	6.28416	0.0018862	0.00892478	Up	AT1G67370	ASY1	DNA-binding HORMA family protein	LOC_Os09g32930	retrotransposon protein
TraesCS7A02G251200	6.28213	0.000540386	0.00308486	Up	AT4G31250		Probable LRR receptor-like serine/threonine-protein kinase At4g31250	LOC_Os08g40990	receptor-like protein kinase 1
TraesCS6B02G089100	6.28194	0.00649122	0.0247512	Up	AT3G47570		Probable LRR receptor-like serine/threonine-protein kinase At3g47570	LOC_Os01g05960	receptor kinase
TraesCS7D02G489000	6.27497	0.00709873	0.0266061	Up	AT1G17145		RING/U-box superfamily protein	LOC_Os06g44275	expressed protein
TraesCS6B02G178800	6.27486	0.00894555	0.0321653	Up	AT5G07800		Flavin-containing monooxygenase FMO GS-OX-like 9	LOC_Os07g02140	flavin-containing monooxygenase family protein
TraesCS2A02G309000	6.27228	0.000228738	0.00147569	Up	AT1G33970		P-loop containing nucleoside triphosphate hydrolases superfamily protein	LOC_Os04g36030	AIG1
TraesCS2B02G304800	6.27198	1.85709e-09	4.17939e-08	Up	AT5G13330	ERF113	Ethylene-responsive transcription factor ERF113	LOC_Os04g32620	ethylene-responsive transcription factor ERF114
TraesCS2B02G609600	6.27086	0.000789286	0.00426325	Up	AT1G78380	GSTU19	Glutathione S-transferase U19	LOC_Os07g05800	glutathione S-transferase
TraesCS7D02G004000	6.27013	0.000508989	0.00293355	Up	AT1G78960	LUP2	Amyrin synthase LUP2	LOC_Os11g08569	cycloartenol synthase
TraesCS2A02G345500	6.26987	6.01978e-13	2.51145e-11	Up	AT5G03860	MLS	Malate synthase	LOC_Os04g40990	malate synthase
TraesCS4D02G169800	6.26865	1.16559e-53	1.62405e-50	Up	AT4G02280	SUS3	Sucrose synthase 3	LOC_Os03g22120	sucrose synthase
TraesCS2B02G533500	6.26757	4.23486e-13	1.81063e-11	Up
TraesCS2A02G318800	6.26737	9.18623e-06	8.99131e-05	Up				LOC_Os04g37760	expressed protein
TraesCS5D02G325000	6.26677	0.00856455	0.0310712	Up	AT1G32950		Subtilase family protein	LOC_Os09g36110	OsSub59 - Putative Subtilisin homologue
TraesCS3D02G303300	6.2641	4.76291e-05	0.000379791	Up	AT1G31300		TRAM%2C LAG1 and CLN8 (TLC) lipid-sensing domain containing protein	LOC_Os01g56230	transmembrane protein 56
TraesCS4B02G131500	6.26246	1.16007e-77	9.1593e-74	Up	AT5G13750	ZIFL1	Protein ZINC INDUCED FACILITATOR-LIKE 1	LOC_Os11g04104	major facilitator superfamily antiporter
TraesCS3D02G092900	6.26242	1.27513e-21	1.71124e-19	Up	AT5G40390	RFS5	Probable galactinol--sucrose galactosyltransferase 5	LOC_Os01g07530	uncharacterized glycosyltransferase
TraesCS5A02G477400	6.26209	3.27434e-12	1.21184e-10	Up	AT5G59820	ZAT12	Zinc finger protein ZAT12	LOC_Os03g60560	ZOS3-21 - C2H2 zinc finger protein
TraesCS6D02G190400	6.2602	1.93606e-10	5.26352e-09	Up	AT1G14130		2-oxoglutarate (2OG) and Fe(II)-dependent oxygenase superfamily protein	LOC_Os04g39980	gibberellin 20 oxidase 2
TraesCS2A02G158700	6.2575	6.78576e-06	6.87913e-05	Up	AT2G38900		Serine protease inhibitor%2C potato inhibitor I-type family protein	LOC_Os01g42860	inhibitor I family protein
TraesCS2D02G344200	6.25594	4.0847e-17	3.14131e-15	Up	AT5G03860	MLS	Malate synthase	LOC_Os04g40990	malate synthase
TraesCS3B02G413100	6.25356	0.00254583	0.0114768	Up	AT5G64560	MRS2-2	Magnesium transporter MRS2-2	LOC_Os01g64890	CorA-like magnesium transporter protein
TraesCS6B02G325000	6.25233	0.00298342	0.0131047	Up	AT5G07330		unknown protein%3B FUNCTIONS IN: molecular_function unknown%3B INVOLVED IN: biological_process unknown%3B LOCATED IN: mitochondrion%3B BEST Arabidopsis thaliana protein match is: unknown protein (TAIR:AT1G63060.1)%3B Has 1807 Blast hits to 1807 proteins in 27 /.../ies: Archae - 0%3B Bacteria - 0%3B Metazoa - 736%3B Fungi - 347%3B Plants - 385%3B Viruses - 0%3B Other Eukaryotes - 339 (source: NCBI…	LOC_Os11g32890	expressed protein
TraesCS3D02G276100	6.24907	0.000835996	0.00447853	Up	AT5G25930		Protein kinase family protein with leucine-rich repeat domain	LOC_Os01g53920	receptor-like protein kinase 5 precursor
TraesCS7D02G368700	6.24747	3.04505e-06	3.37552e-05	Up	AT5G44410		FAD-binding Berberine family protein	LOC_Os06g35650	reticuline oxidase-like protein precursor
TraesCS2B02G123000	6.24198	0.000228489	0.00147449	Up	AT5G01840	OFP1	Transcription repressor OFP1	LOC_Os07g48150	DUF623 domain containing protein
TraesCS2A02G177200	6.2401	2.50543e-11	7.95774e-10	Up	AT4G27250		NAD(P)-binding Rossmann-fold superfamily protein	LOC_Os07g40986	NAD dependent epimerase/dehydratase family protein
TraesCS5A02G513200	6.23846	1.09774e-20	1.30008e-18	Up	AT3G23920	BAM1	Beta-amylase 1%2C chloroplastic	LOC_Os03g04770	beta-amylase
TraesCS2B02G548800	6.23744	0.00988853	0.0348743	Up	AT3G19000		2-oxoglutarate (2OG) and Fe(II)-dependent oxygenase superfamily protein	LOC_Os04g55070	gibberellin 20 oxidase 2
TraesCS6B02G124300	6.23464	0.00388795	0.0163226	Up				LOC_Os09g03210	expressed protein
TraesCS1D02G217700	6.23459	2.405e-11	7.66705e-10	Up	AT5G40250	ATL46	RING-H2 finger protein ATL46	LOC_Os10g41660	zinc finger
TraesCS4A02G030600	6.22864	0.000550662	0.00313483	Up	AT3G22490		Seed maturation protein	LOC_Os03g06360	late embryogenesis abundant protein D-34
TraesCS4A02G370200	6.22494	0.00392679	0.0164615	Up				LOC_Os03g05700	expressed protein
TraesCS1A02G229000	6.22109	0.00195657	0.00920122	Up	AT1G09200	HTR2	Histone H3.2	LOC_Os01g64640	histone H3
TraesCS3B02G313600	6.21831	0.00756737	0.0280146	Up	AT3G16520	UGT88A1	UDP-glycosyltransferase 88A1	LOC_Os01g53420	anthocyanidin 5
TraesCS1D02G266000	6.21754	1.98327e-11	6.4196e-10	Up				LOC_Os01g04050	BBTI12 - Bowman-Birk type bran trypsin inhibitor precursor
TraesCS5D02G240200	6.2173	0.00220163	0.0101675	Up	AT2G30070	POT1	Potassium transporter 1	LOC_Os09g27580	potassium transporter
TraesCS6D02G061000	6.21714	0.00485018	0.0195366	Up				LOC_Os02g36530	expressed protein
TraesCS6B02G269000	6.21665	0.0140445	0.0463952	Up	AT4G23030		MATE efflux family protein	LOC_Os02g45380	MATE domain containing protein
TraesCS1D02G385400	6.21446	1.10144e-08	2.12669e-07	Up	AT3G03280		unknown protein%3B FUNCTIONS IN: molecular_function unknown%3B INVOLVED IN: N-terminal protein myristoylation%3B LOCATED IN: cellular_component unknown%3B BEST Arabidopsis thaliana protein match is: unknown protein (TAIR:AT5G17350.1)%3B Has 137 Blast hits to /.../oteins in 11 species: Archae - 0%3B Bacteria - 0%3B Metazoa - 0%3B Fungi - 0%3B Plants - 137%3B Viruses - 0%3B Other Eukaryotes - 0 (so…	LOC_Os05g47960	expressed protein
TraesCS3D02G223400	6.21288	2.54057e-10	6.735e-09	Up	AT1G70420		Protein of unknown function (DUF1645)	LOC_Os01g45250	DUF1645 domain containing protein
TraesCS5B02G394700	6.20853	0.000613734	0.00343183	Up	AT3G11930		Adenine nucleotide alpha hydrolases-like superfamily protein	LOC_Os03g53900	universal stress protein domain containing protein
TraesCS4A02G100900	6.20838	0.000945324	0.00497255	Up	AT2G33290	SUVH2	Histone-lysine N-methyltransferase family member SUVH2	LOC_Os08g45130	histone-lysine N-methyltransferase
TraesCS6B02G420600	6.20716	0.000309261	0.00191324	Up	AT2G35930	PUB23	E3 ubiquitin-protein ligase PUB23	LOC_Os02g33590	U-box domain-containing protein
TraesCS1A02G388600	6.20663	0.00375087	0.0158489	Up	AT5G22880	H2B	Histone H2B.10	LOC_Os01g05610	Core histone H2A/H2B/H3/H4 domain containing protein
TraesCS2D02G222200	6.20137	0.00333229	0.014368	Up	AT4G23180	CRK10	Cysteine-rich receptor-like protein kinase 10	LOC_Os07g35310	TKL_IRAK_DUF26-lc.12 - DUF26 kinases have homology to DUF26 containing loci
TraesCS4A02G102600	6.19996	0.0141579	0.0466786	Up	AT3G14690	CYP72A15	Cytochrome P450 72A15	LOC_Os01g43844	cytochrome P450 72A1
TraesCS1D02G247400	6.19925	0.00823632	0.0300542	Up				LOC_Os05g32860	expressed protein
TraesCS1D02G395200	6.19745	6.2296e-14	3.00219e-12	Up	AT3G12700		Eukaryotic aspartyl protease family protein	LOC_Os05g48330	aspartyl protease family protein
TraesCS2D02G563800	6.19678	0.00881502	0.0317905	Up	AT4G26090	RPS2	Disease resistance protein RPS2	LOC_Os04g08390	Leucine Rich Repeat family protein
TraesCS3D02G227100	6.19633	0.000968837	0.00507679	Up	AT2G18500	OFP7	Transcription repressor OFP7	LOC_Os01g43610	DUF623 domain containing protein
TraesCS6B02G011700	6.1961	0.00157663	0.0076723	Up	AT4G37000	RCCR	Red chlorophyll catabolite reductase%2C chloroplastic	LOC_Os10g25030	red chlorophyll catabolite reductase
TraesCS4A02G259300	6.19446	2.20435e-13	9.81455e-12	Up	AT5G39050	PMAT1	Phenolic glucoside malonyltransferase 1	LOC_Os02g28340	transferase family protein
TraesCS5D02G313912	6.19034	0.0130564	0.0437535	Up
TraesCS6A02G012200	6.18824	1.56157e-09	3.56255e-08	Up	AT4G24770	CP31A	31 kDa ribonucleoprotein%2C chloroplastic	LOC_Os09g39190	OsFBO22 - F-box and other domain containing protein
TraesCS7D02G152600	6.1857	0.00149472	0.00733244	Up	AT2G24130		Putative leucine-rich repeat receptor-like serine/threonine-protein kinase At2g24130	LOC_Os06g08710	receptor-like protein kinase precursor
TraesCS6B02G363300	6.18285	0.00149657	0.00733912	Up				LOC_Os10g34840	RIPER6 - Ripening-related family protein precursor
TraesCS5B02G426200	6.18261	2.10149e-09	4.67389e-08	Up	AT4G18390	TCP2	Transcription factor TCP2	LOC_Os03g57190	TCP family transcription factor
TraesCS1A02G190400	6.17977	0.00318263	0.0138354	Up	AT5G22880	H2B	Histone H2B.10	LOC_Os01g05610	Core histone H2A/H2B/H3/H4 domain containing protein
TraesCS4D02G055000	6.17785	5.09773e-05	0.000403264	Up	AT1G50200	ALATS	Alanine--tRNA ligase	LOC_Os10g10244	alanyl-tRNA synthetase
TraesCS2A02G394100	6.17587	0.00049489	0.00286379	Up	AT1G65780		P-loop containing nucleoside triphosphate hydrolases superfamily protein	LOC_Os04g49320	tRNA-splicing endonuclease positive effector-related
TraesCS5A02G487800	6.16846	0.00047665	0.00277656	Up	AT3G54630		CONTAINS InterPro DOMAIN/s: Kinetochore protein Ndc80 (InterPro:IPR005550)%3B Has 24780 Blast hits to 15608 proteins in 1321 species: Archae - 545%3B Bacteria - 2969%3B Metazoa - 12597%3B Fungi - 2181%3B Plants - 1581%3B Viruses - 39%3B Other Eukaryotes - 4868 (s /.../ NCBI BLink).	LOC_Os08g36490	kinetochore protein
TraesCS4B02G132100	6.1684	1.78623e-32	6.79672e-30	Up	AT1G34300		G-type lectin S-receptor-like serine/threonine-protein kinase At1g34300	LOC_Os12g07800	S-locus-like receptor protein kinase
TraesCS5A02G211300	6.16697	0.00177679	0.00848848	Up	AT3G43120		SAUR-like auxin-responsive protein family	LOC_Os09g26610	OsSAUR38 - Auxin-responsive SAUR gene family member
TraesCS5B02G068600	6.16505	3.07863e-09	6.63379e-08	Up	AT3G18950		Transducin/WD40 repeat-like superfamily protein	LOC_Os12g40260	WD-40 repeat family protein
TraesCS7B02G262300	6.1644	1.55874e-09	3.5578e-08	Up
TraesCS5D02G437200	6.16356	0.00105043	0.00543849	Up	AT1G28220	PUP3	Purine permease 3	LOC_Os09g29210	purine permease
TraesCS4A02G253800	6.16313	0.00105189	0.00544515	Up	AT5G09640	SCPL19	Serine carboxypeptidase-like 19	LOC_Os03g52040	OsSCP19 - Putative Serine Carboxypeptidase homologue
TraesCS5D02G523400	6.16251	0.0100446	0.0353437	Up	AT2G26140	FTSH4	ATP-dependent zinc metalloprotease FTSH 4%2C mitochondrial	LOC_Os01g39250	OsFtsH4 FtsH protease
TraesCS1D02G259700	6.16213	9.04164e-13	3.66878e-11	Up	AT2G19130		G-type lectin S-receptor-like serine/threonine-protein kinase At2g19130	LOC_Os04g34420	serine/threonine-protein kinase receptor precursor
TraesCS2D02G214900	6.16108	0.000293677	0.00183105	Up	AT2G45280	RAD51C	DNA repair protein RAD51 homolog 3	LOC_Os01g39630	DNA repair protein Rad51
TraesCS7A02G502900	6.15993	0.00452562	0.018502	Up	AT4G30850	HHP2	Heptahelical transmembrane protein 2	LOC_Os06g44250	haemolysin-III
TraesCS3B02G580500	6.15919	1.30647e-16	9.33506e-15	Up	AT1G43710	SDC	Serine decarboxylase	LOC_Os02g33710	decarboxylase
TraesCS2B02G068900	6.15799	0.00444404	0.0182322	Up	AT3G45070	SOT5	Cytosolic sulfotransferase 5	LOC_Os09g08190	sulfotransferase domain containing protein
TraesCS2D02G575200	6.15724	0.000510516	0.00294056	Up	AT5G09590	HSP70-10	Heat shock 70 kDa protein 10%2C mitochondrial	LOC_Os03g02260	DnaK family protein
TraesCS3D02G068500	6.15407	0.000454742	0.00266417	Up	AT3G50150		Plant protein of unknown function (DUF247)	LOC_Os08g26820	plant protein of unknown function domain containing protein
TraesCS3D02G034200	6.15357	1.22779e-11	4.12951e-10	Up				LOC_Os01g03380	BBTI6 - Bowman-Birk type bran trypsin inhibitor precursor
TraesCS7D02G332100	6.15222	0.00631789	0.024214	Up	AT4G02080	SAR1A	GTP-binding protein SAR1A	LOC_Os01g15010	miro
TraesCS3A02G140100	6.15096	0.000745633	0.00405544	Up	AT3G15030	TCP4	Transcription factor TCP4	LOC_Os01g11550	TCP family transcription factor
TraesCS4B02G197500	6.15034	0.00255401	0.0115033	Up	AT3G54770	ARP1	Probable RNA-binding protein ARP1	LOC_Os03g17760	RNA recognition motif containing protein
TraesCS3B02G357600	6.14947	0.000666755	0.00368589	Up	AT1G28360	ERF12	Ethylene-responsive transcription factor 12	LOC_Os05g41760	AP2 domain containing protein
TraesCS2D02G505600	6.14802	0.00965917	0.034232	Up	AT3G14680	CYP72A14	Cytochrome P450 72A14	LOC_Os01g43844	cytochrome P450 72A1
TraesCS4B02G050500	6.14368	1.31257e-50	1.48049e-47	Up	AT3G17800		Protein of unknown function (DUF760)	LOC_Os03g50870	expressed protein
TraesCS2A02G190500	6.14354	0.0019255	0.009079	Up	AT5G48130		BTB/POZ domain-containing protein At5g48130	LOC_Os07g39530	BTBN16 - Bric-a-Brac
TraesCS3D02G317900	6.14334	1.96846e-10	5.34523e-09	Up	AT5G54630		zinc finger protein-related	LOC_Os01g57650	ZOS1-12 - C2H2 zinc finger protein
TraesCS1B02G442600	6.14328	0.00471662	0.0191048	Up	AT2G27430		ARM repeat superfamily protein	LOC_Os05g49810	armadillo/beta-catenin-like repeat containing protein
TraesCS4D02G030700	6.14218	0.00226426	0.010409	Up	AT1G18980		Germin-like protein subfamily T member 2	LOC_Os03g48780	Cupin domain containing protein
TraesCS3D02G472000	6.14177	2.22579e-14	1.13992e-12	Up	AT4G23180	CRK10	Cysteine-rich receptor-like protein kinase 10	LOC_Os02g27310	TKL_IRAK_DUF26-lc.6 - DUF26 kinases have homology to DUF26 containing loci
TraesCS4D02G014300	6.14127	1.11092e-70	5.8475e-67	Up	AT2G32090		Lactoylglutathione lyase / glyoxalase I family protein	LOC_Os03g45720	glyoxalase family protein
TraesCS7B02G471500	6.13984	0.00212227	0.00986106	Up	AT3G12500	CHI-B	Basic endochitinase B	LOC_Os06g51050	CHIT7 - Chitinase family protein precursor
TraesCS3B02G449000	6.13972	0.00411216	0.0170837	Up	AT3G27420		unknown protein%3B BEST Arabidopsis thaliana protein match is: unknown protein (TAIR:AT5G40600.1)%3B Has 43 Blast hits to 43 proteins in 15 species: Archae - 0%3B Bacteria - 0%3B Metazoa - 3%3B Fungi - 0%3B Plants - 39%3B Viruses - 0%3B Other Eukaryotes - 1 (source /.../ BLink).
TraesCS6D02G134100	6.13783	0.00731147	0.0272418	Up	AT2G12400		unknown protein%3B FUNCTIONS IN: molecular_function unknown%3B INVOLVED IN: biological_process unknown%3B LOCATED IN: endomembrane system%3B EXPRESSED IN: 25 plant structures%3B EXPRESSED DURING: 13 growth stages%3B BEST Arabidopsis thaliana protein match is: u /.../ protein (TAIR:AT2G25270.1)%3B Has 177 Blast hits to 172 proteins in 23 species: Archae - 0%3B Bacteria - 2%3B Metazoa - 3%3B Fungi …	LOC_Os02g09080	expressed protein
TraesCS7B02G043200	6.13354	6.63975e-31	2.21511e-28	Up	AT1G80530		Major facilitator superfamily protein	LOC_Os06g08110	nodulin
TraesCS7D02G185500	6.13192	0.00105332	0.00545017	Up	AT5G59720	HSP18.1	18.1 kDa class I heat shock protein	LOC_Os03g16020	hsp20/alpha crystallin family protein
TraesCS2A02G177500	6.1295	1.87105e-13	8.42958e-12	Up	AT4G27250		NAD(P)-binding Rossmann-fold superfamily protein	LOC_Os07g40986	NAD dependent epimerase/dehydratase family protein
TraesCS5A02G009200	6.12717	0.00253196	0.0114268	Up	AT3G04710	TPR10	ankyrin repeat family protein	LOC_Os12g43940	ankyrin repeat domain-containing protein
TraesCS3D02G403000	6.1269	1.31057e-28	3.48796e-26	Up	AT1G17020	SRG1	Protein SRG1	LOC_Os03g63900	1-aminocyclopropane-1-carboxylate oxidase 2
TraesCS2D02G414300	6.12646	0.00215958	0.0100107	Up	AT5G47230	ERF5	Ethylene-responsive transcription factor 5	LOC_Os04g46250	AP2 domain containing protein
TraesCS4A02G495100	6.12576	0.000167585	0.00112682	Up	AT4G15370	BARS1	Baruol synthase	LOC_Os11g08569	cycloartenol synthase
TraesCS2A02G201300	6.12523	0.00980812	0.03465	Up	AT1G11680	CYP51G1	Sterol 14-demethylase	LOC_Os05g12040	cytochrome P450 51
TraesCS1B02G297200	6.12488	0.00106535	0.00550457	Up	AT1G07660		Histone H4	LOC_Os05g39050	Core histone H2A/H2B/H3/H4 domain containing protein
TraesCS7A02G464800	6.12426	0.000133741	0.000929196	Up	AT1G56010	NAC021	NAC domain-containing protein 21/22	LOC_Os06g46270	no apical meristem protein
TraesCS7B02G263200	6.11952	0.00357541	0.0152414	Up	AT5G02700		Putative F-box/LRR-repeat protein At5g02700	LOC_Os12g31340	OsFBD15 - F-box and FBD domain containing protein
TraesCS6D02G139700	6.11778	1.02244e-32	3.93788e-30	Up	AT5G57800	CER3	Protein ECERIFERUM 3	LOC_Os02g08230	WAX2
TraesCS6D02G130800	6.11686	1.059e-58	2.22969e-55	Up	AT1G06570	PDS1	phytoene desaturation 1	LOC_Os02g07160	glyoxalase family protein
TraesCS7D02G357400	6.11108	1.66978e-09	3.78119e-08	Up
TraesCS5B02G243200	6.10848	0.00401562	0.0167662	Up	AT5G49700	AHL17	AT-hook motif nuclear-localized protein 17	LOC_Os09g28930	DNA binding protein
TraesCS1D02G271100	6.10818	1.93544e-12	7.47778e-11	Up	AT5G17210		Protein of unknown function (DUF1218)	LOC_Os05g35950	expressed protein
TraesCS6A02G145100	6.10765	1.37212e-08	2.60006e-07	Up	AT2G12400		unknown protein%3B FUNCTIONS IN: molecular_function unknown%3B INVOLVED IN: biological_process unknown%3B LOCATED IN: endomembrane system%3B EXPRESSED IN: 25 plant structures%3B EXPRESSED DURING: 13 growth stages%3B BEST Arabidopsis thaliana protein match is: u /.../ protein (TAIR:AT2G25270.1)%3B Has 177 Blast hits to 172 proteins in 23 species: Archae - 0%3B Bacteria - 2%3B Metazoa - 3%3B Fungi …	LOC_Os02g09080	expressed protein
TraesCS7B02G149600	6.10596	0.00631969	0.0242199	Up	AT5G10870	CM2	Chorismate mutase 2	LOC_Os08g34290	chorismate mutase
TraesCS7B02G094800	6.10057	0.00130783	0.00654232	Up	AT4G24220	VEP1	3-oxo-Delta(4%2C5)-steroid 5-beta-reductase	LOC_Os03g32170	NAD dependent epimerase/dehydratase family protein
TraesCS6D02G063100	6.09778	0.00614747	0.023693	Up	AT5G07990	CYP75B1	Flavonoid 3'-monooxygenase	LOC_Os09g26940	cytochrome P450
TraesCS2D02G168300	6.09776	0.0013538	0.00673917	Up	AT4G39770	TPPH	Probable trehalose-phosphate phosphatase H	LOC_Os07g43160	uncharacterized glycosyl hydrolase Rv2006/MT2062
TraesCS1B02G142800	6.09723	0.00182717	0.00869059	Up	AT1G71695	PER12	Peroxidase 12	LOC_Os04g59160	peroxidase precursor
TraesCS4D02G120000	6.0965	0.0139548	0.0461681	Up	AT3G10870	MES17	Methylesterase 17	LOC_Os11g02580	esterase
TraesCS4B02G235400	6.09486	2.95849e-16	2.01949e-14	Up	AT1G10070	BCAT2	Branched-chain-amino-acid aminotransferase 2%2C chloroplastic	LOC_Os03g12890	aminotransferase domain containing protein
TraesCS1D02G261900	6.0947	0.00111714	0.00573	Up	AT1G09200	HTR2	Histone H3.2	LOC_Os01g64640	histone H3
TraesCS3B02G411100	6.09467	2.1793e-07	3.18986e-06	Up				LOC_Os01g37810	expressed protein
TraesCS7A02G358100	6.09285	1.75819e-60	4.62726e-57	Up	AT3G21250	ABCC8	ABC transporter C family member 8	LOC_Os05g10730	ABC transporter
TraesCS1D02G065300	6.09233	0.00236526	0.010788	Up	AT1G78580	TPS1	Alpha%2Calpha-trehalose-phosphate synthase	LOC_Os05g44210	trehalose-6-phosphate synthase
TraesCS7A02G225700	6.08985	0.00603363	0.0233293	Up	AT4G12050	AHL26	AT-hook motif nuclear-localized protein 26	LOC_Os06g22100	DNA binding protein
TraesCS4A02G250500	6.0867	0.000275628	0.00173324	Up				LOC_Os03g52370	PIII4 - Proteinase inhibitor II family protein precursor
TraesCS3B02G260300	6.0847	1.42963e-58	2.88196e-55	Up	AT5G15860	ICME	Isoprenylcysteine alpha-carbonyl methylesterase ICME	LOC_Os05g50170	ATPCME
TraesCS6D02G137600	6.08115	8.2059e-12	2.84373e-10	Up	AT3G54200		Late embryogenesis abundant (LEA) hydroxyproline-rich glycoprotein family	LOC_Os06g32970	harpin-induced protein 1 domain containing protein
TraesCS4A02G135500	6.08064	1.92617e-30	6.10359e-28	Up	AT2G28490		RmlC-like cupins superfamily protein	LOC_Os03g21790	cupin domain containing protein
TraesCS5B02G335500	6.08002	0.00225298	0.0103667	Up	AT1G65470	FAS1	Chromatin assembly factor 1 subunit FAS1	LOC_Os01g67100	expressed protein
TraesCS3D02G028000	6.07891	0.00203221	0.00950552	Up	AT3G47570		Probable LRR receptor-like serine/threonine-protein kinase At3g47570	LOC_Os11g47210	receptor-like protein kinase 5 precursor
TraesCS2B02G400000	6.07491	8.02159e-09	1.59566e-07	Up	AT1G08630	THA1	Probable low-specificity L-threonine aldolase 1	LOC_Os04g43650	L-allo-threonine aldolase
TraesCS7A02G228300	6.07202	5.70018e-11	1.70208e-09	Up	AT3G57680	CTPA3	Carboxyl-terminal-processing peptidase 3%2C chloroplastic	LOC_Os06g21380	OsCttP3 - Putative C-terminal processing peptidase homologue
TraesCS1B02G022700	6.07171	0.0077133	0.028457	Up	AT4G06634		Uncharacterized zinc finger protein At4g06634	LOC_Os05g01550	ZOS5-01 - C2H2 zinc finger protein
TraesCS1B02G455400	6.07145	0.00104811	0.00542861	Up				LOC_Os05g50730	expressed protein
TraesCS4D02G097600	6.06885	0.00536627	0.0212024	Up	AT1G58070		unknown protein%3B Has 286 Blast hits to 266 proteins in 81 species: Archae - 2%3B Bacteria - 25%3B Metazoa - 90%3B Fungi - 19%3B Plants - 78%3B Viruses - 4%3B Other Eukaryotes - 68 (source: NCBI BLink).	LOC_Os11g09040	expressed protein
TraesCS7A02G204000	6.06676	0.00247289	0.0111938	Up	AT5G37630	EMB2656	ARM repeat superfamily protein	LOC_Os06g14460	chromosome condensation protein like
TraesCS5A02G205800	6.06539	0.00146165	0.00719964	Up	AT2G45910	PUB33	U-box domain-containing protein 33	LOC_Os02g57700	protein kinase
TraesCS7A02G096200	6.06411	1.51175e-05	0.000139521	Up	AT5G15130	WRKY72	Probable WRKY transcription factor 72	LOC_Os06g05380	WRKY73
TraesCS1D02G000200	6.06268	0.00901254	0.0323558	Up
TraesCS6D02G117100	6.06	0.0086556	0.0313404	Up				LOC_Os09g24940	expressed protein
TraesCS7D02G189500	6.05887	0.0121817	0.0413813	Up	AT1G18790	RKD1	Protein RKD1	LOC_Os06g12360	pentatricopeptide
TraesCS1D02G233300	6.05877	0.00148947	0.00731103	Up	AT5G22880	H2B	Histone H2B.10	LOC_Os08g38300	Core histone H2A/H2B/H3/H4 domain containing protein
TraesCS3B02G572600	6.05862	0.00079657	0.00429794	Up				LOC_Os03g57050	expressed protein
TraesCS7A02G392400	6.05725	1.34152e-11	4.49128e-10	Up	AT3G30725	GDU6	Protein GLUTAMINE DUMPER 6	LOC_Os06g42660	expressed protein
TraesCS3A02G534100	6.05695	0.000792943	0.00427983	Up	AT5G02560	HTA12	Probable histone H2A.4	LOC_Os01g31800	Core histone H2A/H2B/H3/H4 domain containing protein
TraesCS2B02G277200	6.05652	0.00127303	0.00639969	Up	AT5G66920	sks17	SKU5 similar 17	LOC_Os07g02810	L-ascorbate oxidase homolog precursor
TraesCS2D02G452800	6.05629	0.00730474	0.0272221	Up	AT3G60220	ATL4	E3 ubiquitin-protein ligase ATL4	LOC_Os04g49700	zinc finger
TraesCS5A02G152200	6.05555	0.00400003	0.0167131	Up	AT2G30130	LBD12	LOB domain-containing protein 12	LOC_Os03g45750	DUF260 domain containing protein
TraesCS1D02G395300	6.05463	0.00250436	0.01132	Up	AT2G03770	SOT13	Cytosolic sulfotransferase 13	LOC_Os09g38239	sulfotransferase domain containing protein
TraesCS4B02G283800	6.05384	7.60128e-13	3.11636e-11	Up	AT5G39530		Protein of unknown function (DUF1997)	LOC_Os03g07200	expressed protein
TraesCS3D02G534200	6.05353	2.78175e-11	8.76488e-10	Up	AT4G32940	GAMMA-VPE	Vacuolar-processing enzyme gamma-isozyme	LOC_Os01g37910	vacuolar-processing enzyme precursor
TraesCS7B02G038300	6.0527	0.0057006	0.0222679	Up	AT4G25650	PTC52	Protochlorophyllide-dependent translocon component 52%2C chloroplastic	LOC_Os03g59110	pheophorbide a oxygenase
TraesCS2A02G283000	6.05085	4.36191e-11	1.32843e-09	Up	AT1G27990		unknown protein%3B BEST Arabidopsis thaliana protein match is: unknown protein (TAIR:AT5G52420.1)%3B Has 86 Blast hits to 86 proteins in 15 species: Archae - 0%3B Bacteria - 0%3B Metazoa - 0%3B Fungi - 0%3B Plants - 84%3B Viruses - 0%3B Other Eukaryotes - 2 (source /.../ BLink).	LOC_Os04g31710	expressed protein
TraesCS7A02G030100	6.04918	0.00994906	0.0350669	Up	AT1G32560		Late embryogenesis abundant protein%2C group 1 protein	LOC_Os06g02040	late embryogenesis abundant group 1
TraesCS5A02G143100	6.04885	1.92636e-09	4.31989e-08	Up	AT5G53950	NAC098	Protein CUP-SHAPED COTYLEDON 2	LOC_Os12g03050	no apical meristem protein
TraesCS5A02G057300	6.0468	0.00673359	0.0254948	Up
TraesCS6B02G366300	6.04425	0.00137144	0.00681627	Up				LOC_Os02g53660	expressed protein
TraesCS7B02G356700	6.04335	4.83422e-07	6.52454e-06	Up	AT2G19130		G-type lectin S-receptor-like serine/threonine-protein kinase At2g19130	LOC_Os01g66610	serine/threonine-protein kinase receptor precursor
TraesCS2D02G534500	6.04056	0.00734958	0.0273569	Up
TraesCS6D02G393700	6.03271	7.87496e-06	7.84482e-05	Up				LOC_Os11g31060	IQ calmodulin-binding and BAG domain containing protein
TraesCS1D02G306500	6.03006	0.00448902	0.0183778	Up	AT5G03100		F-box protein At5g03100	LOC_Os07g18560	OsFBLD6 - F-box
TraesCS1A02G245100	6.02915	0.00592016	0.0229778	Up	AT3G26340	PBE2	Proteasome subunit beta type-5-B	LOC_Os06g06030	peptidase
TraesCS6B02G119600	6.02417	0.000418106	0.00247649	Up				LOC_Os03g51350	expressed protein
TraesCS5A02G112600	6.0217	0.00131542	0.00657476	Up	AT5G64750	ABR1	Ethylene-responsive transcription factor ABR1	LOC_Os11g06770	ethylene-responsive transcription factor ERF110
TraesCS2A02G179100	6.02096	0.0020324	0.00950593	Up	AT5G09530		hydroxyproline-rich glycoprotein family protein	LOC_Os07g40850	retrotransposon protein
TraesCS5A02G534000	6.01887	0.000611357	0.00342156	Up	AT2G30490	CYP73A5	Trans-cinnamate 4-monooxygenase	LOC_Os05g25640	cytochrome P450
TraesCS6B02G354400	6.01769	0.00134843	0.00671528	Up	AT3G03270		Adenine nucleotide alpha hydrolases-like superfamily protein	LOC_Os02g53320	universal stress protein domain containing protein
TraesCS3A02G137300	6.0166	0.00321223	0.0139378	Up	AT5G24130		unknown protein%3B FUNCTIONS IN: molecular_function unknown%3B INVOLVED IN: biological_process unknown%3B LOCATED IN: mitochondrion%3B EXPRESSED IN: petal%2C leaf whorl%2C flower%3B EXPRESSED DURING: 4 anthesis%2C petal differentiation and expansion stage%3B Has 1807 /.../ hits to 1807 proteins in 277 species: Archae - 0%3B Bacteria - 0%3B Metazoa - 736%3B Fungi - 347%3B Plants - 385%3B Viruses -…	LOC_Os02g15740	expressed protein
TraesCS1D02G376400	6.01628	2.77436e-12	1.04434e-10	Up	AT1G34300		G-type lectin S-receptor-like serine/threonine-protein kinase At1g34300	LOC_Os03g30890	S-locus-like receptor protein kinase
TraesCS6B02G309700	6.01373	0.000876797	0.00466577	Up	AT5G46960		Plant invertase/pectin methylesterase inhibitor superfamily protein	LOC_Os02g33390	pectinesterase inhibitor domain containing protein
TraesCS5A02G077500	6.01294	0.000608907	0.00341007	Up				LOC_Os12g38140	expressed protein
TraesCS7B02G265200	6.01284	0.00356513	0.0152038	Up	AT5G21105		Plant L-ascorbate oxidase	LOC_Os06g37080	L-ascorbate oxidase precursor
TraesCS2B02G366200	6.01118	0.00268811	0.0120142	Up	AT1G67530	PUB7	U-box domain-containing protein 7	LOC_Os04g41250	armadillo/beta-catenin repeat family protein
TraesCS4A02G007800	6.00721	5.13185e-09	1.06092e-07	Up				LOC_Os03g08330	ZIM domain containing protein
TraesCS2A02G119600	6.00635	4.41002e-08	7.52443e-07	Up	AT2G47890	COL13	Zinc finger protein CONSTANS-LIKE 13	LOC_Os07g47140	CCT/B-box zinc finger protein
TraesCS2B02G055300	6.00577	0.0115468	0.0396134	Up	AT3G14460		Putative disease resistance protein At3g14460	LOC_Os11g10550	NBS-LRR disease resistance protein
TraesCS1B02G422500	6.00151	0.00122258	0.00618973	Up				LOC_Os11g38790	expressed protein
TraesCS5D02G509400	5.99931	0.00957548	0.033984	Up	AT5G45530		Protein of unknown function (DUF594)	LOC_Os05g46690	expressed protein
TraesCS1A02G153400	5.99773	0.0153295	0.0497588	Up	AT4G33080		AGC (cAMP-dependent%2C cGMP-dependent and protein kinase C) kinase family protein	LOC_Os05g43570	AGC_AGC_other_NDRh_TRCd.2 - ACG kinases include homologs to PKA
TraesCS7B02G232900	5.99693	1.44871e-06	1.74719e-05	Up				LOC_Os06g33880	expressed protein
TraesCS3D02G284800	5.99574	0.00736973	0.0274125	Up	AT2G25770		Polyketide cyclase/dehydrase and lipid transport superfamily protein	LOC_Os01g52570	lachrymatory factor synthase
TraesCS3D02G224700	5.99448	3.40113e-22	4.86772e-20	Up	AT3G48530	KING1	SNF1-related protein kinase regulatory subunit gamma-1	LOC_Os01g44250	CBS domain containing membrane protein
TraesCS2B02G509700	5.99276	1.42215e-24	2.56653e-22	Up	AT3G20660	2025-10-04	Organic cation/carnitine transporter 4	LOC_Os04g53930	organic cation transporter protein
TraesCS3A02G380500	5.99255	0.000985699	0.00515005	Up	AT5G64560	MRS2-2	Magnesium transporter MRS2-2	LOC_Os01g64890	CorA-like magnesium transporter protein
TraesCS1A02G058700	5.99249	0.0117192	0.040092	Up	AT3G11320		Probable sugar phosphate/phosphate translocator At3g11320	LOC_Os05g03070	transporter
TraesCS4B02G277500	5.9916	0.00668955	0.0253675	Up	AT3G63460	SEC31B	Protein transport protein SEC31 homolog B	LOC_Os07g46370	WD domain
TraesCS6B02G321400	5.99	0.00115445	0.00589136	Up	AT1G23800	ALDH2B7	Aldehyde dehydrogenase family 2 member B7%2C mitochondrial	LOC_Os02g49720	aldehyde dehydrogenase
TraesCS3A02G289000	5.98955	0.00426593	0.0176229	Up	AT3G22550		Protein of unknown function (DUF581)	LOC_Os01g52100	DUF581 domain containing protein
TraesCS3B02G331300	5.98838	0.00638096	0.0244103	Up				LOC_Os02g53410	expressed protein
TraesCS3B02G313900	5.98798	1.80754e-14	9.40178e-13	Up	AT3G16520	UGT88A1	UDP-glycosyltransferase 88A1	LOC_Os01g53330	anthocyanidin 5
TraesCS1D02G420400	5.98458	0.00106328	0.0054957	Up	AT4G18550	DSEL	Phospholipase A1-IIgamma	LOC_Os05g49840	phospholipase
TraesCS7B02G094400	5.98252	2.40611e-35	1.15136e-32	Up	AT2G36780	UGT73C3	UDP-glycosyltransferase 73C3	LOC_Os10g09990	cytokinin-O-glucosyltransferase 3
TraesCS2D02G527800	5.9798	1.87397e-20	2.15736e-18	Up	AT3G29670	PMAT2	Phenolic glucoside malonyltransferase 2	LOC_Os04g54560	transferase family protein
TraesCS1D02G400300	5.97977	0.0015286	0.00747465	Up	AT3G14880		BEST Arabidopsis thaliana protein match is: transcription factor-related (TAIR:AT4G18650.1)%3B Has 560 Blast hits to 560 proteins in 40 species: Archae - 0%3B Bacteria - 0%3B Metazoa - 2%3B Fungi - 0%3B Plants - 558%3B Viruses - 0%3B Other Eukaryotes - 0 (source: /.../BLink).	LOC_Os05g48650	transcription factor HBP-1b
TraesCS1A02G263700	5.97845	2.46843e-33	9.95207e-31	Up	AT1G01720	NAC002	NAC domain-containing protein 2	LOC_Os05g34830	No apical meristem protein
TraesCS4D02G292800	5.9781	0.0121275	0.0412283	Up	AT5G09430		alpha/beta-Hydrolases superfamily protein	LOC_Os03g08110	hydrolase protein
TraesCS2B02G605800	5.97625	1.06667e-06	1.32943e-05	Up	AT3G48990	AAE3	Oxalate--CoA ligase	LOC_Os04g58710	AMP-binding domain containing protein
TraesCS5D02G427000	5.97618	0.000538988	0.00307818	Up
TraesCS3B02G199300	5.97129	0.00616283	0.0237398	Up	AT1G29520		AWPM-19-like family protein	LOC_Os01g14530	AWPM-19-like membrane family protein
TraesCS6D02G261200	5.96986	0.000414439	0.00245742	Up	AT5G46960		Plant invertase/pectin methylesterase inhibitor superfamily protein	LOC_Os02g33390	pectinesterase inhibitor domain containing protein
TraesCS6A02G291300	5.96714	1.38317e-08	2.61995e-07	Up
TraesCS5A02G478400	5.96602	0.000158049	0.00107175	Up	AT5G59820	ZAT12	Zinc finger protein ZAT12	LOC_Os03g60570	ZOS3-22 - C2H2 zinc finger protein
TraesCS4D02G302800	5.96587	3.02489e-22	4.35556e-20	Up
TraesCS5B02G087400	5.96153	0.00522187	0.0207387	Up	AT3G53510	ABCG20	ABC transporter G family member 20	LOC_Os05g02890	white-brown complex homolog protein 16
TraesCS1A02G387400	5.95463	8.10965e-12	2.81656e-10	Up	AT3G12700		Eukaryotic aspartyl protease family protein	LOC_Os05g48330	aspartyl protease family protein
TraesCS7B02G203300	5.95421	0.0110635	0.0382382	Up	AT3G28345	ABCB15	ABC transporter B family member 15	LOC_Os08g05710	ABC transporter
TraesCS2D02G286800	5.95302	0.010925	0.0378473	Up	AT1G12880	NUDT12	Nudix hydrolase 12%2C mitochondrial	LOC_Os02g32060	hydrolase
TraesCS3D02G496500	5.95285	0.00549877	0.0216312	Up				LOC_Os12g14670	hypothetical protein
TraesCS5D02G054300	5.94887	7.3395e-16	4.74344e-14	Up	AT5G39120		Germin-like protein subfamily 1 member 15	LOC_Os08g08980	cupin domain containing protein
TraesCS5B02G390600	5.93734	0.00558031	0.0218847	Up	AT3G22490		Seed maturation protein	LOC_Os03g53610	late embryogenesis abundant protein D-34
TraesCS5B02G372100	5.93667	3.70596e-05	0.000305326	Up
TraesCS3B02G298800	5.93617	8.33672e-07	1.06538e-05	Up	AT3G18215		Protein of unknown function%2C DUF599	LOC_Os02g19060	expressed protein
TraesCS2A02G324600	5.93556	0.011198	0.0386184	Up
TraesCS2D02G227300	5.93303	0.000519841	0.00298502	Up	AT5G17760		P-loop containing nucleoside triphosphate hydrolases superfamily protein	LOC_Os03g38800	AAA family ATPase
TraesCS3B02G160500	5.93239	5.72222e-10	1.42598e-08	Up	AT3G16330		unknown protein%3B BEST Arabidopsis thaliana protein match is: unknown protein (TAIR:AT1G52140.1)%3B Has 109 Blast hits to 109 proteins in 16 species: Archae - 0%3B Bacteria - 0%3B Metazoa - 0%3B Fungi - 0%3B Plants - 109%3B Viruses - 0%3B Other Eukaryotes - 0 (sou /.../CBI BLink).	LOC_Os01g10180	avr9/Cf-9 rapidly elicited protein 146
TraesCS5D02G218700	5.93211	0.00620558	0.0238656	Up	AT1G72490		unknown protein%3B BEST Arabidopsis thaliana protein match is: unknown protein (TAIR:AT1G17400.1)%3B Has 75 Blast hits to 75 proteins in 21 species: Archae - 0%3B Bacteria - 0%3B Metazoa - 3%3B Fungi - 4%3B Plants - 58%3B Viruses - 0%3B Other Eukaryotes - 10 (sourc /.../I BLink).	LOC_Os09g26840	expressed protein
TraesCS3A02G251800	5.92643	0.0112857	0.038867	Up	AT3G62160		HXXXD-type acyl-transferase family protein	LOC_Os05g19910	transferase family protein
TraesCS4A02G405000	5.92452	4.30055e-10	1.09297e-08	Up
TraesCS6B02G288400	5.92263	0.014546	0.0476944	Up	AT1G65920		Regulator of chromosome condensation (RCC1) family with FYVE zinc finger domain	LOC_Os02g45980	ZR1 protein
TraesCS5B02G281000	5.92201	0.00628556	0.0241126	Up	AT2G38870		Serine protease inhibitor%2C potato inhibitor I-type family protein	LOC_Os12g25090	expressed protein
TraesCS3A02G300400	5.92105	3.40705e-15	1.9804e-13	Up	AT1G23300		MATE efflux family protein	LOC_Os01g56050	MATE efflux family protein
TraesCS1A02G426800	5.91943	4.98029e-08	8.39913e-07	Up	AT5G24130		unknown protein%3B FUNCTIONS IN: molecular_function unknown%3B INVOLVED IN: biological_process unknown%3B LOCATED IN: mitochondrion%3B EXPRESSED IN: petal%2C leaf whorl%2C flower%3B EXPRESSED DURING: 4 anthesis%2C petal differentiation and expansion stage%3B Has 1807 /.../ hits to 1807 proteins in 277 species: Archae - 0%3B Bacteria - 0%3B Metazoa - 736%3B Fungi - 347%3B Plants - 385%3B Viruses -…	LOC_Os05g50940	expressed protein
TraesCS7D02G380400	5.91745	0.000629896	0.00351101	Up	AT4G25000	AMY1	Alpha-amylase 1	LOC_Os08g36900	alpha-amylase precursor
TraesCS1B02G276900	5.91684	1.3468e-22	2.02546e-20	Up				LOC_Os01g04050	BBTI12 - Bowman-Birk type bran trypsin inhibitor precursor
TraesCS1A02G362500	5.91556	0.000740477	0.00403504	Up	AT5G11950	LOG8	Cytokinin riboside 5'-monophosphate phosphoribohydrolase LOG8	LOC_Os05g46360	possible lysine decarboxylase domain containing protein
TraesCS3A02G123000	5.91433	2.67893e-20	3.00586e-18	Up	AT3G60160	ABCC9	ABC transporter C family member 9	LOC_Os01g25386	multidrug resistance-associated protein
TraesCS2B02G231700	5.91424	0.000449549	0.00263701	Up	AT1G21250	WAK1	Wall-associated receptor kinase 1	LOC_Os10g02720	OsWAK99 - OsWAK receptor-like protein kinase
TraesCS4B02G079100	5.91066	0.00099701	0.00520055	Up	AT1G47710		Serpin-ZX	LOC_Os03g41438	serpin domain containing protein
TraesCS2D02G274900	5.90986	0.00459725	0.0187326	Up	AT2G31980	CYS2	Cysteine proteinase inhibitor 2	LOC_Os04g28250	cysteine proteinase inhibitor precursor
TraesCS3D02G064100	5.90764	0.000815502	0.0043861	Up	AT5G38260		Protein kinase superfamily protein	LOC_Os01g02420	protein kinase domain containing protein
TraesCS1D02G158400	5.90735	0.00102939	0.00534705	Up	AT5G23190	CYP86B1	Cytochrome P450 86B1	LOC_Os10g34480	cytochrome P450
TraesCS7B02G050500	5.90556	1.62513e-22	2.42098e-20	Up	AT5G13170	SWEET15	Bidirectional sugar transporter SWEET15	LOC_Os02g30910	nodulin MtN3 family protein
TraesCS2D02G146400	5.90499	4.861e-13	2.05791e-11	Up	AT5G23530	CXE18	Probable carboxylesterase 18	LOC_Os07g44910	gibberellin receptor GID1L2
TraesCS7A02G011100	5.90417	0.00138136	0.00685765	Up
TraesCS4D02G197400	5.90349	0.00255056	0.0114921	Up	AT1G07900	LBD1	LOB domain-containing protein 1	LOC_Os03g17810	DUF260 domain containing protein
TraesCS1B02G343100	5.90108	0.00450785	0.0184405	Up	AT4G21070	BRCA1	Protein BREAST CANCER SUSCEPTIBILITY 1 homolog	LOC_Os05g43610	ATBARD1/BARD1
TraesCS2A02G422400	5.90026	0.00208899	0.00973219	Up	AT5G23260	TT16	Protein TRANSPARENT TESTA 16	LOC_Os04g52410	OsMADS31 - MADS-box family gene with MIKCc type-box
TraesCS6D02G298500	5.8991	0.000903639	0.0047865	Up	AT4G25000	AMY1	Alpha-amylase 1	LOC_Os08g36910	alpha-amylase precursor
TraesCS2B02G394700	5.89866	1.04694e-06	1.30776e-05	Up	AT1G21230	WAK5	Wall-associated receptor kinase 5	LOC_Os04g24220	OsWAK32 - OsWAK receptor-like protein kinase
TraesCS2A02G129900	5.89586	4.63238e-09	9.66525e-08	Up	AT3G57060		binding	LOC_Os07g46540	condensin complex subunit 1
TraesCS2D02G456900	5.89534	8.70411e-79	7.49709e-75	Up	AT1G18330	RVE7	Protein REVEILLE 7	LOC_Os04g49450	MYB family transcription factor
TraesCS3A02G492500	5.8944	1.00118e-09	2.37619e-08	Up	AT1G76640	CML39	Calcium-binding protein CML39	LOC_Os01g72530	OsCML31 - Calmodulin-related calcium sensor protein
TraesCS2D02G184000	5.89389	0.00526195	0.0208615	Up				LOC_Os07g02980	expressed protein
TraesCS5A02G231300	5.89334	1.28775e-13	5.92174e-12	Up	AT1G55230		Family of unknown function (DUF716)	LOC_Os09g27260	plant viral response family protein
TraesCS4D02G282600	5.89314	1.23524e-10	3.479e-09	Up	AT5G39530		Protein of unknown function (DUF1997)	LOC_Os03g07200	expressed protein
TraesCS4B02G212300	5.89107	0.00196287	0.00922629	Up	AT3G46230	HSP17.4A	17.4 kDa class I heat shock protein	LOC_Os03g16020	hsp20/alpha crystallin family protein
TraesCS6B02G376200	5.89088	6.61748e-31	2.21511e-28	Up	AT4G33150	LKR/SDH	lysine-ketoglutarate reductase/saccharopine dehydrogenase bifunctional enzyme	LOC_Os02g54254	saccharopine dehydrogenase
TraesCS2A02G120500	5.89014	0.0135267	0.0450364	Up				LOC_Os08g32420	expressed protein
TraesCS4D02G333200	5.88961	0.0040717	0.0169446	Up				LOC_Os10g04700	OsFBX361 - F-box domain containing protein
TraesCS6A02G087200	5.88845	0.00237284	0.0108127	Up	AT4G05050	UBQ11	Polyubiquitin 11	LOC_Os02g06640	ubiquitin family protein
TraesCS1D02G221800	5.88388	4.43404e-12	1.60961e-10	Up	AT5G24930	ATCOL4	CONSTANS-like 4	LOC_Os10g41100	CCT motif family protein
TraesCS1A02G212300	5.88342	0.0046987	0.019051	Up	AT1G65680	EXPB2	Putative expansin-B2	LOC_Os10g40710	expansin precursor
TraesCS6B02G206900	5.88336	0.00334578	0.0144179	Up	AT3G53150	UGT73D1	UDP-glycosyltransferase 73D1	LOC_Os02g11640	UDP-glucoronosyl and UDP-glucosyl transferase
TraesCS2D02G388000	5.88162	1.08668e-06	1.35063e-05	Up	AT3G09830		Protein kinase superfamily protein	LOC_Os02g43430	protein kinase domain containing protein
TraesCS3B02G115900	5.88134	0.00687354	0.0259093	Up	AT1G48140		dolichol-phosphate mannosyltransferase-related	LOC_Os02g51420	expressed protein
TraesCS5B02G237300	5.87634	0.00455738	0.018603	Up	AT3G19230		Leucine-rich repeat (LRR) family protein	LOC_Os09g28470	leucine-rich repeat family protein
TraesCS3A02G378400	5.87607	5.41008e-07	7.21949e-06	Up				LOC_Os01g37810	expressed protein
TraesCS1D02G010300	5.87539	9.78897e-18	8.19316e-16	Up	AT2G35910	ATL70	RING-H2 finger protein ATL70	LOC_Os07g06560	zinc finger
TraesCSU02G059300	5.87489	0.00522201	0.0207387	Up	AT3G14470	RPPL1	Putative disease resistance RPP13-like protein 1	LOC_Os01g25760	powdery mildew resistance protein PM3F
TraesCS7B02G106300	5.87449	0.004701	0.0190561	Up				LOC_Os06g13940	expressed protein
TraesCS5D02G228400	5.87398	1.03029e-07	1.61668e-06	Up	AT4G30420		WAT1-related protein At4g30420	LOC_Os09g25810	nodulin
TraesCS3D02G502900	5.87192	1.97123e-08	3.61459e-07	Up
TraesCS2A02G255600	5.87	5.18553e-06	5.41076e-05	Up	AT5G59080		unknown protein%3B FUNCTIONS IN: molecular_function unknown%3B INVOLVED IN: response to oxidative stress%3B LOCATED IN: chloroplast%3B EXPRESSED IN: 18 plant structures%3B EXPRESSED DURING: 9 growth stages%3B BEST Arabidopsis thaliana protein match is: unknown /.../n (TAIR:AT3G46880.1)%3B Has 1807 Blast hits to 1807 proteins in 277 species: Archae - 0%3B Bacteria - 0%3B Metazoa - 736%3B Fungi - 3…	LOC_Os05g38040	expressed protein
TraesCS6A02G171000	5.86976	0.00233135	0.0106621	Up				LOC_Os02g09760	expressed protein
TraesCS6B02G089200	5.8672	0.00970439	0.0343579	Up	AT5G20480	EFR	LRR receptor-like serine/threonine-protein kinase EFR	LOC_Os01g05960	receptor kinase
TraesCS1A02G104600	5.86668	0.00611622	0.0235977	Up	AT1G52080	AR791	actin binding protein family	LOC_Os07g09040	peptidyl-prolyl cis-trans isomerase
TraesCS7A02G423900	5.86604	3.10602e-27	7.1428e-25	Up	AT4G31750	WIN2	Probable protein phosphatase 2C 59	LOC_Os06g48300	protein phosphatase 2C
TraesCS2D02G114100	5.86554	0.00620365	0.0238605	Up	AT3G29630	UGT79B4	UDP-glycosyltransferase 79B4	LOC_Os07g47550	glucosyltransferase
TraesCS3D02G402800	5.86319	0.00285075	0.012617	Up	AT1G55200		Protein kinase protein with adenine nucleotide alpha hydrolases-like domain	LOC_Os01g65940	expressed protein
TraesCS6D02G131100	5.8631	0.00226137	0.0103977	Up	AT3G06880		Transducin/WD40 repeat-like superfamily protein	LOC_Os02g07190	expressed protein
TraesCS1B02G226100	5.86302	0.000868489	0.00462957	Up	AT1G65680	EXPB2	Putative expansin-B2	LOC_Os10g40730	expansin precursor
TraesCS5A02G357800	5.86237	0.00151891	0.00743458	Up				LOC_Os09g38450	expressed protein
TraesCS7B02G102300	5.86034	0.00284764	0.012607	Up	AT3G02610	S-ACP-DES2	Plant stearoyl-acyl-carrier-protein desaturase family protein	LOC_Os08g10010	acyl-desaturase
TraesCS5D02G484900	5.85916	1.57621e-17	1.27946e-15	Up	AT5G24960	CYP71A14	Cytochrome P450 71A14	LOC_Os08g01490	cytochrome P450
TraesCS1A02G323000	5.85861	9.849e-07	1.2376e-05	Up				LOC_Os10g04540	expressed protein
TraesCS1D02G010200	5.85066	0.000773344	0.00418813	Up	AT3G25500	FH1	Formin-like protein 1	LOC_Os05g01350	retrotransposon protein
TraesCS1B02G048300	5.84771	0.000146904	0.00100684	Up	AT2G37040	PAL1	Phenylalanine ammonia-lyase 1	LOC_Os04g43800	phenylalanine ammonia-lyase
TraesCS5D02G558700	5.84736	0.00271273	0.0121093	Up	AT1G04560		AWPM-19-like family protein	LOC_Os07g24000	AWPM-19-like membrane family protein
TraesCS6A02G344000	5.84513	2.10341e-39	1.31111e-36	Up	AT4G33150	LKR/SDH	lysine-ketoglutarate reductase/saccharopine dehydrogenase bifunctional enzyme	LOC_Os02g54254	saccharopine dehydrogenase
TraesCS3A02G228900	5.84505	0.00150082	0.00735817	Up	AT2G18500	OFP7	Transcription repressor OFP7	LOC_Os01g43610	DUF623 domain containing protein
TraesCS2D02G067600	5.84301	1.40714e-22	2.10951e-20	Up	AT2G15480	UGT73B5	UDP-glycosyltransferase 73B5	LOC_Os05g42020	UDP-glucoronosyl and UDP-glucosyl transferase domain containing protein
TraesCS1D02G364200	5.843	0.00535928	0.0211818	Up	AT1G09200	HTR2	Histone H3.2	LOC_Os01g64640	histone H3
TraesCS3B02G147900	5.84111	0.00312516	0.0136328	Up	AT3G26922		F-box/LRR-repeat protein At3g26922	LOC_Os01g41310	OsFBX18 - F-box domain containing protein
TraesCS1B02G469800	5.83989	0.00259866	0.011668	Up	AT5G44410		FAD-binding Berberine family protein	LOC_Os06g35550	retrotransposon protein
TraesCS2A02G427300	5.83979	0.00332666	0.0143482	Up	AT5G44310		Late embryogenesis abundant protein (LEA) family protein	LOC_Os04g52110	late embryogenesis abundant protein
TraesCS5D02G299400	5.83869	7.40438e-09	1.48442e-07	Up	AT1G54570		Acyltransferase-like protein At1g54570%2C chloroplastic	LOC_Os09g33530	expressed protein
TraesCS6A02G165100	5.83848	0.0015411	0.00752567	Up	AT1G56430	NAS4	Probable nicotianamine synthase 4	LOC_Os03g19420	nicotianamine synthase
TraesCS1A02G399000	5.83441	0.0066679	0.0252996	Up	AT1G65740		Probable F-box protein At1g65740	LOC_Os01g34630	retrotransposon protein
TraesCS2D02G387100	5.82962	3.46739e-22	4.94761e-20	Up	AT1G76880		Duplicated homeodomain-like superfamily protein	LOC_Os04g45750	expressed protein
TraesCS7A02G445700	5.82758	0.0124701	0.0422008	Up	AT1G79910		Regulator of Vps4 activity in the MVB pathway protein	LOC_Os06g47250	DUF292 domain containing protein
TraesCS7A02G364900	5.82568	8.10101e-19	7.80018e-17	Up
TraesCS2D02G011200	5.82331	0.013025	0.0436713	Up	AT1G15780	MED15A	Mediator of RNA polymerase II transcription subunit 15a	LOC_Os04g03860	expressed protein
TraesCS1D02G255300	5.82092	0.00961627	0.0341071	Up	AT5G50290		unknown protein%3B FUNCTIONS IN: molecular_function unknown%3B INVOLVED IN: biological_process unknown%3B LOCATED IN: endomembrane system%3B BEST Arabidopsis thaliana protein match is: unknown protein (TAIR:AT3G17350.1)%3B Has 300 Blast hits to 300 proteins i /.../pecies: Archae - 0%3B Bacteria - 0%3B Metazoa - 0%3B Fungi - 0%3B Plants - 300%3B Viruses - 0%3B Other Eukaryotes - 0 (source: NCBI BL…	LOC_Os05g33860	expressed protein
TraesCS2A02G412300	5.8203	0.00168543	0.00811845	Up	AT5G09640	SCPL19	Serine carboxypeptidase-like 19	LOC_Os11g24510	OsSCP56 - Putative Serine Carboxypeptidase homologue
TraesCSU02G225400	5.81999	0.00686153	0.0258737	Up
TraesCS5D02G100100	5.81723	1.02563e-08	1.9966e-07	Up	AT1G56580	SVB	Protein of unknown function%2C DUF538	LOC_Os12g37650	DUF538 domain containing protein
TraesCS3B02G552400	5.81689	2.49886e-18	2.2787e-16	Up	AT5G12330	LRP1	Protein LATERAL ROOT PRIMORDIUM 1	LOC_Os01g72490	LRP1
TraesCS5A02G213600	5.81562	4.79648e-69	2.27224e-65	Up	AT1G54100	ALDH7B4	Aldehyde dehydrogenase family 7 member B4	LOC_Os09g26880	aldehyde dehydrogenase
TraesCS2D02G281000	5.81056	0.00420079	0.0174008	Up	AT3G11590		unknown protein%3B LOCATED IN: plasma membrane%3B EXPRESSED IN: 22 plant structures%3B EXPRESSED DURING: 13 growth stages%3B BEST Arabidopsis thaliana protein match is: unknown protein (TAIR:AT5G22310.1)%3B Has 22320 Blast hits to 15179 proteins in 1213 speci /.../chae - 372%3B Bacteria - 2307%3B Metazoa - 10906%3B Fungi - 1700%3B Plants - 1146%3B Viruses - 65%3B Other Eukaryotes - 5824 (source: …	LOC_Os04g31400	expressed protein
TraesCS4B02G167500	5.81034	3.41004e-60	8.5023e-57	Up	AT4G02280	SUS3	Sucrose synthase 3	LOC_Os03g22120	sucrose synthase
TraesCS2D02G359200	5.80852	0.00522544	0.0207498	Up	AT2G33205		Serinc-domain containing serine and sphingolipid biosynthesis protein	LOC_Os04g42720	TMS membrane protein/tumour differentially expressed protein
TraesCS7B02G074800	5.80814	0.00368573	0.0156308	Up	AT1G60360		RING/U-box superfamily protein	LOC_Os06g10800	zinc finger family protein
TraesCS7D02G536900	5.80616	3.71957e-19	3.69795e-17	Up	AT4G16770		2-oxoglutarate (2OG) and Fe(II)-dependent oxygenase superfamily protein	LOC_Os10g37899	transposon protein
TraesCS3A02G376900	5.8042	0.00434171	0.0178844	Up	AT2G35930	PUB23	E3 ubiquitin-protein ligase PUB23	LOC_Os01g64570	U-box domain-containing protein
TraesCS4B02G135300	5.8036	0.00794179	0.029149	Up	AT3G48690	CXE12	Probable carboxylesterase 12	LOC_Os09g28730	gibberellin receptor GID1L2
TraesCS2A02G168900	5.80117	0.00346606	0.0148441	Up	AT1G48410	AGO1	Protein argonaute 1	LOC_Os03g58600	PAZ domain containing protein
TraesCS5D02G293500	5.79875	0.00174717	0.00836766	Up	AT5G50400	PAP27	Probable inactive purple acid phosphatase 27	LOC_Os09g32840	nucleotide pyrophosphatase/phosphodiesterase
TraesCS7A02G196900	5.79622	0.0033037	0.0142732	Up	AT3G11480	BSMT1	Salicylate/benzoate carboxyl methyltransferase	LOC_Os06g13560	SAM dependent carboxyl methyltransferase
TraesCS5A02G303300	5.79216	2.6357e-08	4.70022e-07	Up	AT3G03080		Zinc-binding dehydrogenase family protein	LOC_Os12g12560	NADP-dependent oxidoreductase
TraesCS7B02G440800	5.79122	0.00719702	0.0268969	Up				LOC_Os04g08390	Leucine Rich Repeat family protein
TraesCS1B02G257800	5.79092	0.00552657	0.0217229	Up	AT1G07210		Ribosomal protein S18	LOC_Os10g35690	ribosomal protein S18 containing protein
TraesCS4B02G071500	5.78817	3.12312e-15	1.82544e-13	Up	AT5G09300	T5E8_100	2-oxoisovalerate dehydrogenase subunit alpha 2%2C mitochondrial	LOC_Os12g08260	dehydrogenase E1 component domain containing protein
[truncated: 16,477 more rows]

## Sheet: Root
	The information of salt-regulated DEGs in root tissue.
Gene ID	Log2 (Fold Change)	P-value	FDR	Regulation	Annotation
					The homologous genes and corresponding descriptions in Arabidopsis thaliana			The homologous genes and corresponding descriptions in Oryza sativa
TraesCS2D02G222600	13.8698	4.94151e-35	7.20289e-32	Up	AT2G40030	NRPE1	DNA-directed RNA polymerase V subunit 1
TraesCS6D02G037300	13.2291	1.3615e-31	1.49996e-28	Up	AT1G08090	NRT2.1	High-affinity nitrate transporter 2.1	LOC_Os02g02170	transporter
TraesCS1D02G052500	12.4414	1.01355e-29	9.5079e-27	Up	AT2G20340	ELI5	Tyrosine decarboxylase 1	LOC_Os08g04540	decarboxylase
TraesCS6B02G045700	12.4223	9.84267e-27	6.61385e-24	Up	AT5G60770	NRT2.4	High affinity nitrate transporter 2.4	LOC_Os02g02170	transporter
TraesCS6B02G383800	11.8303	7.26933e-38	1.3245e-34	Up
TraesCS6A02G091400	11.8106	1.71852e-19	5.10415e-17	Up	AT5G66780		unknown protein%3B Has 1807 Blast hits to 1807 proteins in 277 species: Archae - 0%3B Bacteria - 0%3B Metazoa - 736%3B Fungi - 347%3B Plants - 385%3B Viruses - 0%3B Other Eukaryotes - 339 (source: NCBI BLink).	LOC_Os03g51350	expressed protein
TraesCS7A02G537600	11.658	5.35006e-15	7.95757e-13	Up	AT1G08080	ACA7	Alpha carbonic anhydrase 7	LOC_Os08g36630	bifunctional monodehydroascorbate reductase and carbonic anhydrasenectarin-3 precursor
TraesCS6D02G222600	11.6204	8.63957e-17	1.72329e-14	Up	AT2G46680	ATHB-7	Homeobox-leucine zipper protein ATHB-7	LOC_Os02g43330	homeobox associated leucine zipper
TraesCS2A02G570500	11.5296	3.82382e-25	2.1565e-22	Up	AT1G65890	AAE12	Probable acyl-activating enzyme 12%2C peroxisomal	LOC_Os03g03790	AMP-binding domain containing protein
TraesCS2A02G075200	11.459	1.36618e-74	1.84915e-70	Up	AT2G45290	TKL-2	Transketolase-2%2C chloroplastic	LOC_Os04g19740	transketolase
TraesCS5B02G442800	11.4064	4.94222e-28	3.80696e-25	Up	AT3G19690		CAP (Cysteine-rich secretory proteins%2C Antigen 5%2C and Pathogenesis-related 1 protein) superfamily protein	LOC_Os07g03710	SCP-like extracellular protein
TraesCS1B02G436500	11.3204	3.00194e-47	9.80766e-44	Up	AT4G22220	ISU1	Iron-sulfur cluster assembly protein 1	LOC_Os05g49300	iron-sulfur cluster assembly enzyme ISCU
TraesCS1D02G418100	10.986	5.34564e-16	9.22547e-14	Up	AT3G53720	CHX20	Cation/H(+) antiporter 20	LOC_Os05g31730	transporter
TraesCSU02G048600	10.8671	5.01059e-16	8.72671e-14	Up	AT2G30770	CYP71A13	cytochrome P450%2C family 71%2C subfamily A%2C polypeptide 13	LOC_Os08g01510	cytochrome P450
TraesCS5A02G303400	10.8552	1.8326e-39	3.61732e-36	Up	AT3G03080		Zinc-binding dehydrogenase family protein	LOC_Os12g12590	NADP-dependent oxidoreductase
TraesCS3B02G356500	10.8237	1.14859e-28	9.80401e-26	Up	AT1G60420		Probable nucleoredoxin 1	LOC_Os01g58194	protein disulfide isomerase
TraesCS6A02G399900	10.7992	3.09501e-23	1.38976e-20	Up				LOC_Os10g04570	expressed protein
TraesCS3A02G452400	10.611	0.000697467	0.00640535	Up	AT3G09220	LAC7	Laccase-7	LOC_Os11g42200	laccase precursor protein
TraesCS3A02G446600	10.6021	1.91783e-15	3.09024e-13	Up	AT4G13420	POT5	Potassium transporter 5	LOC_Os02g31940	potassium transporter
TraesCS7D02G070200	10.5789	1.54736e-19	4.61025e-17	Up	AT2G27830		unknown protein%3B BEST Arabidopsis thaliana protein match is: unknown protein (TAIR:AT4G22758.1)%3B Has 131 Blast hits to 131 proteins in 17 species: Archae - 0%3B Bacteria - 0%3B Metazoa - 0%3B Fungi - 0%3B Plants - 131%3B Viruses - 0%3B Other Eukaryotes - 0 (sou /.../CBI BLink).	LOC_Os06g04480	expressed protein
TraesCS5D02G421100	10.5616	1.39319e-25	8.46146e-23	Up	AT2G43000	JUB1	Transcription factor JUNGBRUNNEN 1	LOC_Os03g56580	no apical meristem protein
TraesCS7A02G443600	10.4389	1.96608e-14	2.67642e-12	Up	AT1G06620		1-aminocyclopropane-1-carboxylate oxidase homolog 1	LOC_Os08g30210	1-aminocyclopropane-1-carboxylate oxidase homolog 1
TraesCS5B02G415600	10.4224	3.69938e-20	1.18814e-17	Up	AT2G43000	JUB1	Transcription factor JUNGBRUNNEN 1	LOC_Os03g56580	no apical meristem protein
TraesCS4D02G265200	10.3776	1.21579e-21	4.62615e-19	Up	AT3G59070		Cytochrome b561 and DOMON domain-containing protein At3g59070	LOC_Os03g09880	AIR12
TraesCS2A02G516500	10.3739	1.99969e-20	6.62457e-18	Up	AT2G20340	ELI5	Tyrosine decarboxylase 1	LOC_Os08g04540	decarboxylase
TraesCS1D02G381300	10.3277	4.9264e-23	2.16091e-20	Up	AT3G18280		Bifunctional inhibitor/lipid-transfer protein/seed storage 2S albumin superfamily protein	LOC_Os05g47730	LTPL153 - Protease inhibitor/seed storage/LTP family protein precursor
TraesCS6A02G076500	10.3005	1.01049e-07	3.35107e-06	Up				LOC_Os03g47420	OsFBX107 - F-box domain containing protein
TraesCS4B02G053900	10.2342	3.98783e-27	2.77817e-24	Up	AT5G66780		unknown protein%3B Has 1807 Blast hits to 1807 proteins in 277 species: Archae - 0%3B Bacteria - 0%3B Metazoa - 736%3B Fungi - 347%3B Plants - 385%3B Viruses - 0%3B Other Eukaryotes - 339 (source: NCBI BLink).	LOC_Os03g51350	expressed protein
TraesCS5B02G020100	10.1759	5.44385e-17	1.12616e-14	Up	AT2G34930		disease resistance family protein / LRR family protein	LOC_Os11g35410	expressed protein
TraesCS1A02G092100	10.0961	3.13773e-23	1.4023e-20	Up	AT3G26300	CYP71B34	Cytochrome P450 71B34	LOC_Os08g01490	cytochrome P450
TraesCS3B02G446400	10.0896	1.70189e-16	3.24493e-14	Up	AT5G06730	PER54	Peroxidase 54	LOC_Os03g13180	peroxidase precursor
TraesCS3B02G574600	10.0419	5.0979e-21	1.82266e-18	Up	AT4G24220	VEP1	3-oxo-Delta(4%2C5)-steroid 5-beta-reductase	LOC_Os03g32170	NAD dependent epimerase/dehydratase family protein
TraesCS7B02G342400	10.0393	1.33231e-17	3.01268e-15	Up	AT1G06620		1-aminocyclopropane-1-carboxylate oxidase homolog 1	LOC_Os08g30210	1-aminocyclopropane-1-carboxylate oxidase homolog 1
TraesCS4A02G389900	10.0378	8.9028e-24	4.26013e-21	Up				LOC_Os06g05120	expressed protein
TraesCS3B02G309300	9.98307	2.42159e-25	1.40758e-22	Up	AT2G19900	NADP-ME1	NADP-dependent malic enzyme 1	LOC_Os05g09440	NADP-dependent malic enzyme
TraesCS2D02G450600	9.96209	8.66026e-11	5.74597e-09	Up	AT5G24090	CHIB1	Acidic endochitinase	LOC_Os04g27980	glycosyl hydrolase
TraesCS6A02G181000	9.94317	2.61835e-09	1.28049e-07	Up	AT3G26330	CYP71B37	Cytochrome P450 71B37	LOC_Os02g09390	cytochrome P450
TraesCS6A02G240400	9.83672	7.01177e-15	1.02363e-12	Up	AT2G46680	ATHB-7	Homeobox-leucine zipper protein ATHB-7	LOC_Os02g43330	homeobox associated leucine zipper
TraesCS6D02G080300	9.81727	4.94691e-20	1.55714e-17	Up				LOC_Os03g51350	expressed protein
TraesCS1A02G406300	9.77285	8.99066e-21	3.09756e-18	Up	AT4G22220	ISU1	Iron-sulfur cluster assembly protein 1	LOC_Os01g47340	iron-sulfur cluster assembly enzyme ISCU
TraesCS3A02G412400	9.75062	7.68887e-14	9.36362e-12	Up	AT5G06730	PER54	Peroxidase 54	LOC_Os03g13180	peroxidase precursor
TraesCS2B02G380400	9.72678	6.25555e-08	2.19595e-06	Up	AT5G17540		HXXXD-type acyl-transferase family protein	LOC_Os04g42830	transferase family protein
TraesCS7D02G070400	9.68778	2.22241e-06	4.97417e-05	Up	AT2G27830		unknown protein%3B BEST Arabidopsis thaliana protein match is: unknown protein (TAIR:AT4G22758.1)%3B Has 131 Blast hits to 131 proteins in 17 species: Archae - 0%3B Bacteria - 0%3B Metazoa - 0%3B Fungi - 0%3B Plants - 131%3B Viruses - 0%3B Other Eukaryotes - 0 (sou /.../CBI BLink).	LOC_Os06g04480	expressed protein
TraesCS7B02G007700	9.67617	1.25809e-16	2.42767e-14	Up	AT2G38870		Serine protease inhibitor%2C potato inhibitor I-type family protein	LOC_Os08g34249	inhibitor I family protein
TraesCS4A02G044100	9.66107	0.000453018	0.00450621	Up	AT5G35735		Cytochrome b561 and DOMON domain-containing protein At5g35735	LOC_Os03g09880	AIR12
TraesCS1B02G455700	9.65831	5.85357e-13	6.01521e-11	Up	AT2G46150		Late embryogenesis abundant (LEA) hydroxyproline-rich glycoprotein family	LOC_Os05g50720	harpin-induced protein 1 domain containing protein
TraesCS2B02G090100	9.64325	1.55167e-22	6.41985e-20	Up	AT2G45290	TKL-2	Transketolase-2%2C chloroplastic	LOC_Os04g19740	transketolase
TraesCS4A02G372900	9.60716	9.86406e-11	6.46768e-09	Up	AT2G27830		unknown protein%3B BEST Arabidopsis thaliana protein match is: unknown protein (TAIR:AT4G22758.1)%3B Has 131 Blast hits to 131 proteins in 17 species: Archae - 0%3B Bacteria - 0%3B Metazoa - 0%3B Fungi - 0%3B Plants - 131%3B Viruses - 0%3B Other Eukaryotes - 0 (sou /.../CBI BLink).	LOC_Os06g04480	expressed protein
TraesCS6A02G352900	9.60308	9.4721e-26	5.82756e-23	Up	AT2G37710	LECRK41	L-type lectin-domain containing receptor kinase IV.1	LOC_Os10g30540	lectin-like receptor kinase
TraesCS5D02G379200	9.58908	6.29054e-31	6.31767e-28	Up
TraesCS6A02G032500	9.5578	2.17838e-16	4.08699e-14	Up	AT1G08090	NRT2.1	High-affinity nitrate transporter 2.1	LOC_Os02g02170	transporter
TraesCSU02G249900	9.55169	4.79072e-18	1.16684e-15	Up	AT2G20340	ELI5	Tyrosine decarboxylase 1	LOC_Os08g04540	decarboxylase
TraesCS3B02G155100	9.54851	1.73857e-23	8.10913e-21	Up	AT5G24130		unknown protein%3B FUNCTIONS IN: molecular_function unknown%3B INVOLVED IN: biological_process unknown%3B LOCATED IN: mitochondrion%3B EXPRESSED IN: petal%2C leaf whorl%2C flower%3B EXPRESSED DURING: 4 anthesis%2C petal differentiation and expansion stage%3B Has 1807 /.../ hits to 1807 proteins in 277 species: Archae - 0%3B Bacteria - 0%3B Metazoa - 736%3B Fungi - 347%3B Plants - 385%3B Viruses -…	LOC_Os02g15740	expressed protein
TraesCS6B02G045600	9.48084	2.61831e-22	1.0647e-19	Up	AT1G08090	NRT2.1	High-affinity nitrate transporter 2.1	LOC_Os02g02170	transporter
TraesCS7B02G244300	9.47857	1.57658e-12	1.47167e-10	Up	AT3G22490		Seed maturation protein	LOC_Os06g23350	late embryogenesis abundant protein D-34
TraesCS6A02G032400	9.44623	0.00102445	0.0087376	Up	AT1G08090	NRT2.1	High-affinity nitrate transporter 2.1	LOC_Os02g02170	transporter
TraesCS3A02G062200	9.40444	0.000720567	0.00657842	Up	AT1G13080	CYP71B2	Cytochrome P450 71B2	LOC_Os01g36350	cytochrome P450
TraesCS3B02G178200	9.35474	1.55159e-14	2.13673e-12	Up	AT1G64110		P-loop containing nucleoside triphosphate hydrolases superfamily protein	LOC_Os01g12660	AAA-type ATPase family protein
TraesCS4D02G055600	9.3543	5.86607e-12	4.88819e-10	Up	AT5G39050	PMAT1	Phenolic glucoside malonyltransferase 1	LOC_Os02g28340	transferase family protein
TraesCS4A02G388700	9.35361	1.33752e-05	0.000233896	Up	AT1G08080	ACA7	Alpha carbonic anhydrase 7	LOC_Os08g36630	bifunctional monodehydroascorbate reductase and carbonic anhydrasenectarin-3 precursor
TraesCS6D02G335400	9.33639	1.47544e-06	3.50267e-05	Up	AT2G37710	LECRK41	L-type lectin-domain containing receptor kinase IV.1	LOC_Os07g38820	lectin-like receptor kinase
TraesCS1A02G220900	9.31289	3.91406e-18	9.68254e-16	Up	AT5G47380		Protein of unknown function%2C DUF547	LOC_Os10g41040	ternary complex factor MIP1
TraesCS1D02G414700	9.2916	1.90907e-21	7.12112e-19	Up	AT4G22220	ISU1	Iron-sulfur cluster assembly protein 1	LOC_Os05g49300	iron-sulfur cluster assembly enzyme ISCU
TraesCS5D02G558900	9.28395	4.44782e-24	2.16109e-21	Up	AT1G04560		AWPM-19-like family protein	LOC_Os07g24000	AWPM-19-like membrane family protein
TraesCS6D02G359100	9.2831	0.00202325	0.015081	Up	AT3G47570		Probable LRR receptor-like serine/threonine-protein kinase At3g47570	LOC_Os06g38340	receptor-like protein kinase precursor
TraesCS6D02G037200	9.24938	0.00151225	0.0119221	Up	AT1G08090	NRT2.1	High-affinity nitrate transporter 2.1	LOC_Os02g02170	transporter
TraesCS4B02G169700	9.22078	5.73393e-31	5.96997e-28	Up	AT2G28490		RmlC-like cupins superfamily protein	LOC_Os03g21790	cupin domain containing protein
TraesCS7A02G059400	9.21107	1.41232e-19	4.22118e-17	Up	AT4G28680	TYRDC	Probable tyrosine decarboxylase 2	LOC_Os08g04540	decarboxylase
TraesCS2A02G423300	9.17661	1.97118e-05	0.000326163	Up				LOC_Os03g18850	pathogenesis-related Bet v I family protein
TraesCS1B02G394700	9.16489	5.33503e-60	3.15921e-56	Up	AT3G18280		Bifunctional inhibitor/lipid-transfer protein/seed storage 2S albumin superfamily protein	LOC_Os05g47730	LTPL153 - Protease inhibitor/seed storage/LTP family protein precursor
TraesCS7B02G116600	9.11054	2.53188e-29	2.24192e-26	Up	AT4G28390	AAC3	ADP%2CATP carrier protein 3%2C mitochondrial	LOC_Os05g23720	mitochondrial carrier protein
TraesCS7D02G457600	9.10923	7.84291e-16	1.32695e-13	Up	AT2G02060		Homeodomain-like superfamily protein	LOC_Os06g45890	MYB family transcription factor
TraesCS6D02G361500	9.09028	1.04475e-16	2.06221e-14	Up	AT3G09220	LAC7	Laccase-7	LOC_Os11g42200	laccase precursor protein
TraesCS3D02G396800	9.07831	6.0987e-13	6.22659e-11	Up	AT5G06060		Tropinone reductase homolog At5g06060	LOC_Os11g43200	tropinone reductase 2
TraesCS2A02G516700	9.05102	1.74518e-13	1.99938e-11	Up	AT2G20340	ELI5	Tyrosine decarboxylase 1	LOC_Os08g04540	decarboxylase
TraesCS3D02G333500	9.04819	6.31543e-15	9.29134e-13	Up	AT1G79620		Leucine-rich repeat protein kinase family protein	LOC_Os05g24010	receptor protein kinase-like
TraesCS5A02G411900	9.04509	2.08732e-24	1.06325e-21	Up	AT2G43000	JUB1	Transcription factor JUNGBRUNNEN 1	LOC_Os03g56580	no apical meristem protein
TraesCS4B02G171600	9.03248	3.34373e-09	1.59439e-07	Up	AT1G14320	RPL10A	60S ribosomal protein L10-1	LOC_Os11g11390	ribosomal protein
TraesCS3D02G483000	9.01106	1.31115e-07	4.19118e-06	Up	AT3G09270	GSTU8	Glutathione S-transferase U8	LOC_Os01g72120	glutathione S-transferase
TraesCS7A02G169800	8.9888	1.14993e-16	2.24179e-14	Up	AT5G42930		alpha/beta-Hydrolases superfamily protein	LOC_Os02g52830	lipase
TraesCS5A02G374800	8.97957	1.41106e-22	5.86369e-20	Up	AT1G17180	GSTU25	Glutathione S-transferase U25	LOC_Os03g44170	glutathione S-transferase
TraesCS5B02G559400	8.96159	7.84369e-23	3.35019e-20	Up	AT5G50600	HSD1	11-beta-hydroxysteroid dehydrogenase 1A	LOC_Os12g27830	dehydrogenase/reductase
TraesCS7D02G432800	8.96013	9.63103e-17	1.913e-14	Up	AT1G06620		1-aminocyclopropane-1-carboxylate oxidase homolog 1	LOC_Os08g30100	1-aminocyclopropane-1-carboxylate oxidase homolog 1
TraesCS2D02G379000	8.94383	4.83874e-31	5.15114e-28	Up	AT1G08630	THA1	Probable low-specificity L-threonine aldolase 1	LOC_Os04g43650	L-allo-threonine aldolase
TraesCS7D02G073300	8.94381	7.52458e-10	4.13529e-08	Up	AT3G51160	MUR1	GDP-mannose 4%2C6 dehydratase 2	LOC_Os06g04620	GDP-mannose 4
TraesCS3D02G224700	8.92458	1.24864e-21	4.73213e-19	Up	AT3G48530	KING1	SNF1-related protein kinase regulatory subunit gamma-1	LOC_Os01g44250	CBS domain containing membrane protein
TraesCS5B02G485200	8.91656	3.57023e-11	2.54334e-09	Up	AT3G48280	CYP71A25	Cytochrome P450 71A25	LOC_Os08g01490	cytochrome P450
TraesCS5D02G478600	8.89982	1.17197e-16	2.28007e-14	Up				LOC_Os01g18530	expressed protein
TraesCS3A02G488200	8.89866	0.00591326	0.034931	Up	AT3G09270	GSTU8	Glutathione S-transferase U8	LOC_Os01g72120	glutathione S-transferase
TraesCS2B02G219900	8.8844	1.40118e-13	1.62692e-11	Up	AT3G54940		Papain family cysteine protease	LOC_Os07g29760	cysteine proteinase A494 precursor
TraesCS7B02G349800	8.87735	3.12309e-16	5.67947e-14	Up	AT3G14690	CYP72A15	Cytochrome P450 72A15	LOC_Os01g43700	cytochrome P450 72A1
TraesCS6D02G366400	8.87246	3.20577e-21	1.15488e-18	Up	AT1G15950	CCR1	Cinnamoyl-CoA reductase 1	LOC_Os02g56680	dehydrogenase
TraesCS2D02G227300	8.83785	3.40338e-14	4.42934e-12	Up	AT5G17760		P-loop containing nucleoside triphosphate hydrolases superfamily protein	LOC_Os03g38800	AAA family ATPase
TraesCS4D02G121500	8.82763	2.34674e-05	0.000379298	Up	AT2G38640		Protein LURP-one-related 8	LOC_Os11g02750	DUF567 domain containing protein
TraesCS6A02G005100	8.79397	0.000961681	0.00831345	Up	AT1G78780		pathogenesis-related family protein	LOC_Os01g14590	pathogen-related protein
TraesCS3B02G571500	8.75838	3.16371e-12	2.77802e-10	Up	AT3G51550	FER	Receptor-like protein kinase FERONIA	LOC_Os01g56330	TKL_IRAK_CrRLK1L-1.5 - The CrRLK1L-1 subfamily has homology to the CrRLK1L homolog
TraesCS7A02G093300	8.74971	1.09404e-20	3.75564e-18	Up	AT5G25940		early nodulin-related	LOC_Os06g04950	early nodulin 93 ENOD93 protein
TraesCS1D02G062900	8.71873	5.90554e-13	6.05548e-11	Up	AT2G38905		Low temperature and salt responsive protein family	LOC_Os05g03130	OsRCI2-7 - Putative low temperature and salt responsive protein
TraesCSU02G129400	8.7032	8.40094e-13	8.33461e-11	Up	AT1G11680	CYP51G1	Sterol 14-demethylase	LOC_Os05g34380	cytochrome P450
TraesCS6B02G174800	8.69856	2.26005e-10	1.37e-08	Up	AT3G58730	VHA-D	V-type proton ATPase subunit D	LOC_Os04g55040	vacuolar ATP synthase subunit D 1
TraesCS6B02G191600	8.69568	2.18243e-10	1.32719e-08	Up	AT5G48330		Regulator of chromosome condensation (RCC1) family protein	LOC_Os02g10380	Regulator of chromosome condensation domain containing protein
TraesCS1D02G236900	8.69482	0.00132158	0.0107167	Up	AT5G26830	THRRS	Threonine--tRNA ligase%2C mitochondrial	LOC_Os08g19850	threonyl-tRNA synthetase
TraesCS2D02G287000	8.63538	2.9119e-06	6.28884e-05	Up				LOC_Os04g32860	expressed protein
TraesCS7D02G150600	8.62984	6.536e-09	2.90187e-07	Up	AT1G15950	CCR1	Cinnamoyl-CoA reductase 1	LOC_Os09g25150	cinnamoyl-CoA reductase
TraesCS5B02G041500	8.62783	2.7486e-13	3.02813e-11	Up	AT2G40475		unknown protein%3B BEST Arabidopsis thaliana protein match is: unknown protein (TAIR:AT3G56260.2)%3B Has 477 Blast hits to 219 proteins in 41 species: Archae - 0%3B Bacteria - 4%3B Metazoa - 91%3B Fungi - 61%3B Plants - 144%3B Viruses - 0%3B Other Eukaryotes - 177 /.../e: NCBI BLink).	LOC_Os07g12720	expressed protein
TraesCS3D02G138100	8.6274	3.18483e-16	5.78065e-14	Up	AT5G24130		unknown protein%3B FUNCTIONS IN: molecular_function unknown%3B INVOLVED IN: biological_process unknown%3B LOCATED IN: mitochondrion%3B EXPRESSED IN: petal%2C leaf whorl%2C flower%3B EXPRESSED DURING: 4 anthesis%2C petal differentiation and expansion stage%3B Has 1807 /.../ hits to 1807 proteins in 277 species: Archae - 0%3B Bacteria - 0%3B Metazoa - 736%3B Fungi - 347%3B Plants - 385%3B Viruses -…	LOC_Os02g15740	expressed protein
TraesCS2D02G017300	8.62139	0.00126599	0.0103448	Up	AT1G68610	PCR11	Protein PLANT CADMIUM RESISTANCE 11	LOC_Os02g36950	uncharacterized Cys-rich domain containing protein
TraesCS5D02G254100	8.60965	0.000538528	0.00519851	Up	AT1G28220	PUP3	Purine permease 3	LOC_Os09g29210	purine permease
TraesCS6D02G210200	8.60314	9.51573e-05	0.00123794	Up	AT1G21270	WAK2	Wall-associated receptor kinase 2	LOC_Os02g41500	OsWAK13 - OsWAK receptor-like protein kinase
TraesCS3A02G126800	8.58946	6.41618e-05	0.000889404	Up	AT3G04710	TPR10	ankyrin repeat family protein	LOC_Os01g09384	ankyrin repeat domain containing protein
TraesCS3B02G025600	8.55413	2.34666e-06	5.21305e-05	Up	AT2G46950	CYP709B2	cytochrome P450%2C family 709%2C subfamily B%2C polypeptide 2	LOC_Os03g25480	cytochrome P450
TraesCS6A02G153100	8.5346	2.75528e-17	6.00118e-15	Up	AT5G63860	UVR8	Ultraviolet-B receptor UVR8	LOC_Os02g34860	Regulator of chromosome condensation domain containing protein
TraesCS5A02G220800	8.53055	0.000415753	0.00420215	Up
TraesCS3B02G434900	8.50905	1.0206e-27	7.43827e-25	Up	AT2G29150		Tropinone reductase homolog At2g29150	LOC_Os11g43200	tropinone reductase 2
TraesCS4B02G210200	8.49503	4.18105e-06	8.63354e-05	Up	AT2G21660	RBG7	Glycine-rich RNA-binding protein 7	LOC_Os05g13630	RNA recognition motif containing protein
TraesCS3A02G300300	8.48499	7.7101e-06	0.000146246	Up	AT4G33467		unknown protein%3B Has 25 Blast hits to 25 proteins in 9 species: Archae - 0%3B Bacteria - 0%3B Metazoa - 0%3B Fungi - 0%3B Plants - 25%3B Viruses - 0%3B Other Eukaryotes - 0 (source: NCBI BLink).	LOC_Os12g08700	expressed protein
TraesCS6B02G095100	8.48366	5.87869e-10	3.29575e-08	Up	AT5G43580		Serine protease inhibitor%2C potato inhibitor I-type family protein	LOC_Os11g17790	inhibitor I family protein
TraesCS3D02G275500	8.42572	5.82945e-31	6.00345e-28	Up	AT2G19900	NADP-ME1	NADP-dependent malic enzyme 1	LOC_Os05g09440	NADP-dependent malic enzyme
TraesCS6B02G419200	8.41825	0.000829035	0.00736984	Up	AT3G14470	RPPL1	Putative disease resistance RPP13-like protein 1	LOC_Os06g47800	disease resistance protein RGA3
TraesCS7B02G094800	8.41596	2.49889e-13	2.77237e-11	Up	AT4G24220	VEP1	3-oxo-Delta(4%2C5)-steroid 5-beta-reductase	LOC_Os03g32170	NAD dependent epimerase/dehydratase family protein
TraesCS5A02G369800	8.39314	3.04706e-11	2.20043e-09	Up
TraesCS5B02G477500	8.3819	2.54518e-11	1.8679e-09	Up				LOC_Os01g18530	expressed protein
TraesCS7A02G423800	8.35678	5.82264e-07	1.56547e-05	Up	AT5G06710	HAT14	Homeobox-leucine zipper protein HAT14	LOC_Os06g48290	homeobox associated leucine zipper
TraesCS1D02G028300	8.35398	0.000202194	0.00231785	Up	AT2G38870		Serine protease inhibitor%2C potato inhibitor I-type family protein	LOC_Os12g36240	inhibitor I family protein
TraesCS3A02G327100	8.34835	2.63717e-11	1.92943e-09	Up	AT1G60420		Probable nucleoredoxin 1	LOC_Os01g58194	protein disulfide isomerase
TraesCS1A02G047400	8.34624	1.47978e-10	9.35936e-09	Up				LOC_Os03g26490	expressed protein
TraesCS5D02G379300	8.34398	4.93501e-16	8.61091e-14	Up				LOC_Os11g26790	dehydrin
TraesCS7D02G208000	8.32528	4.14993e-09	1.92929e-07	Up	AT1G66230	MYB20	myb domain protein 20	LOC_Os06g14670	ODORANT1
TraesCS3B02G376500	8.2932	5.09283e-15	7.58688e-13	Up	AT3G10910	ATL72	RING-H2 finger protein ATL72	LOC_Os01g60730	RING-H2 finger protein
TraesCS7B02G357100	8.28356	1.65369e-09	8.5199e-08	Up	AT2G19130		G-type lectin S-receptor-like serine/threonine-protein kinase At2g19130	LOC_Os01g66640	S-domain receptor-like protein kinase
TraesCS5B02G154200	8.27233	7.69324e-10	4.21819e-08	Up	AT3G22300	RPS10	40S ribosomal protein S10%2C mitochondrial	LOC_Os12g33240	mitochondrial ribosomal protein S10
TraesCS7D02G085600	8.26143	1.66216e-11	1.26188e-09	Up	AT1G21270	WAK2	Wall-associated receptor kinase 2	LOC_Os02g02120	OsWAK11 - OsWAK receptor-like protein kinase
TraesCS7A02G059500	8.25065	0.000149135	0.00179291	Up	AT2G20340	ELI5	Tyrosine decarboxylase 1	LOC_Os08g04540	decarboxylase
TraesCS2A02G113500	8.21959	2.08913e-11	1.55855e-09	Up	AT3G29630	UGT79B4	UDP-glycosyltransferase 79B4	LOC_Os07g47550	glucosyltransferase
TraesCS6A02G403500	8.19291	3.11365e-10	1.84263e-08	Up	AT5G23750		Remorin family protein	LOC_Os02g57840	remorin C-terminal domain containing protein
TraesCS2D02G417600	8.18095	4.97348e-08	1.79102e-06	Up
TraesCS2D02G547700	8.16439	2.92624e-14	3.85604e-12	Up	AT2G45570	CYP76C2	Cytochrome P450 76C2	LOC_Os10g08474	cytochrome P450
TraesCS6D02G223700	8.15616	1.39023e-08	5.73687e-07	Up				LOC_Os02g43540	retrotransposon protein
TraesCS1D02G253900	8.1516	2.44808e-13	2.72877e-11	Up	AT5G18860		inosine-uridine preferring nucleoside hydrolase family protein	LOC_Os05g33630	inosine-uridine preferring nucleoside hydrolase family protein
TraesCS1B02G278400	8.13963	2.15291e-05	0.000351992	Up	AT2G28470	BGAL8	Beta-galactosidase 8	LOC_Os01g39830	beta-galactosidase
TraesCS5B02G372100	8.13078	1.53029e-09	7.92291e-08	Up
TraesCS5B02G461600	8.1278	5.88367e-08	2.08047e-06	Up	AT2G44300		Bifunctional inhibitor/lipid-transfer protein/seed storage 2S albumin superfamily protein	LOC_Os03g58940	LTPL83 - Protease inhibitor/seed storage/LTP family protein precursor
TraesCS2B02G102800	8.11729	1.10454e-12	1.06678e-10	Up	AT1G32100	PRR1	Pinoresinol reductase 1	LOC_Os12g16410	isoflavone reductase
TraesCS5A02G031000	8.11494	1.93879e-10	1.19045e-08	Up				LOC_Os12g42220	expressed protein
TraesCS3A02G146900	8.10744	8.70704e-10	4.71674e-08	Up	AT5G47380		Protein of unknown function%2C DUF547	LOC_Os10g41040	ternary complex factor MIP1
TraesCS3B02G489700	8.10325	2.20205e-25	1.29587e-22	Up	AT3G09220	LAC7	Laccase-7	LOC_Os11g42200	laccase precursor protein
TraesCS7D02G054000	8.08396	0.00322526	0.0218976	Up	AT2G20340	ELI5	Tyrosine decarboxylase 1	LOC_Os08g04540	decarboxylase
TraesCS1D02G210900	8.07823	1.55497e-08	6.32307e-07	Up	AT5G52420		unknown protein%3B FUNCTIONS IN: molecular_function unknown%3B INVOLVED IN: biological_process unknown%3B LOCATED IN: endoplasmic reticulum%3B EXPRESSED IN: 24 plant structures%3B EXPRESSED DURING: 13 growth stages%3B BEST Arabidopsis thaliana protein match is: /.../wn protein (TAIR:AT5G23920.1)%3B Has 30201 Blast hits to 17322 proteins in 780 species: Archae - 12%3B Bacteria - 1396%3B Metazoa - …	LOC_Os10g40040	expressed protein
TraesCS5A02G465900	8.06995	6.78612e-12	5.57639e-10	Up				LOC_Os01g18530	expressed protein
TraesCS1D02G062800	8.06952	3.778e-20	1.20929e-17	Up	AT2G36970	UGT86A1	UDP-glycosyltransferase 86A1	LOC_Os10g30560	UDP-glucoronosyl and UDP-glucosyl transferase domain containing protein
TraesCS2B02G132500	8.05142	1.15947e-07	3.7725e-06	Up	AT5G49690	UGT91C1	UDP-glycosyltransferase 91C1	LOC_Os07g47550	glucosyltransferase
TraesCS2A02G580500	8.04798	1.04105e-12	1.00854e-10	Up	AT3G07040	RPM1	Disease resistance protein RPM1	LOC_Os11g38520	expressed protein
TraesCS3B02G336300	8.0441	4.48901e-06	9.1742e-05	Up	AT4G33467		unknown protein%3B Has 25 Blast hits to 25 proteins in 9 species: Archae - 0%3B Bacteria - 0%3B Metazoa - 0%3B Fungi - 0%3B Plants - 25%3B Viruses - 0%3B Other Eukaryotes - 0 (source: NCBI BLink).	LOC_Os12g08700	expressed protein
TraesCS2A02G382700	8.03122	1.15683e-25	7.07131e-23	Up	AT1G08630	THA1	Probable low-specificity L-threonine aldolase 1	LOC_Os04g43650	L-allo-threonine aldolase
TraesCS6A02G126700	8.02972	2.15769e-10	1.31552e-08	Up	AT1G72300	PSYR1	Tyrosine-sulfated glycopeptide receptor 1	LOC_Os02g05910	phytosulfokine receptor precursor
TraesCS6D02G096900	8.01225	0.000747931	0.00677342	Up	AT1G55730	CAX5	Vacuolar cation/proton exchanger 5	LOC_Os02g04630	sodium/calcium exchanger protein
TraesCS1D02G343300	8.0118	7.37619e-17	1.4965e-14	Up				LOC_Os05g44420	expressed protein
TraesCS7B02G029100	8.01056	0.000308496	0.00328782	Up	AT3G23030	IAA2	Auxin-responsive protein IAA2	LOC_Os06g07040	OsIAA20 - Auxin-responsive Aux/IAA gene family member
TraesCS6B02G314600	8.0081	2.52432e-14	3.37333e-12	Up	AT3G04580	EIN4	Protein EIN4	LOC_Os07g15540	ethylene receptor
TraesCS2D02G518300	8.00743	1.92533e-07	5.90921e-06	Up	AT2G20340	ELI5	Tyrosine decarboxylase 1	LOC_Os08g04540	decarboxylase
TraesCS2D02G521700	8.00061	2.89867e-13	3.17593e-11	Up	AT4G37340	CYP81D3	cytochrome P450%2C family 81%2C subfamily D%2C polypeptide 3	LOC_Os12g39300	cytochrome P450
TraesCS3D02G352700	7.98836	1.24048e-14	1.73349e-12	Up	AT5G59340	WOX2	WUSCHEL-related homeobox 2	LOC_Os01g62310	homeobox domain containing protein
TraesCS4A02G441700	7.97818	5.7441e-08	2.04061e-06	Up	AT2G03200		Eukaryotic aspartyl protease family protein	LOC_Os12g26470	aspartic proteinase nepenthesin-1 precursor
TraesCS6D02G085100	7.97647	6.94126e-17	1.41431e-14	Up	AT1G13080	CYP71B2	Cytochrome P450 71B2	LOC_Os12g16720	cytochrome P450 71A1
TraesCS2D02G007800	7.97568	2.58138e-07	7.65016e-06	Up	AT3G62160		HXXXD-type acyl-transferase family protein	LOC_Os04g11810	transferase family protein
TraesCS1D02G048500	7.96409	3.3561e-08	1.25435e-06	Up				LOC_Os03g26490	expressed protein
TraesCS4A02G441900	7.932	4.31498e-05	0.000636703	Up	AT3G09140		Protein of unknown function (DUF674)	LOC_Os01g06030	expressed protein
TraesCS7D02G278300	7.92538	3.18252e-08	1.19513e-06	Up	AT5G22500	FAR1	Fatty acyl-CoA reductase 1	LOC_Os08g44360	male sterility protein 2
TraesCS5A02G324000	7.91011	9.87435e-17	1.95723e-14	Up	AT1G21230	WAK5	Wall-associated receptor kinase 5	LOC_Os01g26270	OsWAK7 - OsWAK receptor-like protein kinase
TraesCS1B02G446900	7.89717	7.7798e-09	3.40307e-07	Up	AT3G10020		unknown protein%3B FUNCTIONS IN: molecular_function unknown%3B INVOLVED IN: response to oxidative stress%2C anaerobic respiration%3B LOCATED IN: cellular_component unknown%3B EXPRESSED IN: 23 plant structures%3B EXPRESSED DURING: 13 growth stages%3B Has 47 Blast /.../o 47 proteins in 12 species: Archae - 0%3B Bacteria - 0%3B Metazoa - 1%3B Fungi - 0%3B Plants - 46%3B Viruses - 0%3B Other Eukaryot…	LOC_Os11g05170	expressed protein
TraesCS3B02G044100	7.88455	8.08084e-08	2.76001e-06	Up	AT4G23130	CRK5	Cysteine-rich receptor-like protein kinase 5	LOC_Os10g04730	TKL_IRAK_DUF26-la.6 - DUF26 kinases have homology to DUF26 containing loci
TraesCS1B02G442100	7.884	1.26284e-07	4.05739e-06	Up				LOC_Os01g46440	VQ domain containing protein
TraesCS6B02G406200	7.86712	1.45876e-13	1.68963e-11	Up	AT4G37990	CAD8	Cinnamyl alcohol dehydrogenase 8	LOC_Os10g29470	dehydrogenase
TraesCSU02G102900	7.85031	1.67824e-08	6.74616e-07	Up	AT5G20400		2-oxoglutarate (2OG) and Fe(II)-dependent oxygenase superfamily protein	LOC_Os06g08023	flavonol synthase/flavanone 3-hydroxylase
TraesCS3D02G439200	7.84885	3.97915e-15	5.99377e-13	Up	AT4G13420	POT5	Potassium transporter 5	LOC_Os02g31940	potassium transporter
TraesCS2B02G481200	7.84657	4.50503e-11	3.13387e-09	Up	AT1G16500		unknown protein%3B BEST Arabidopsis thaliana protein match is: unknown protein (TAIR:AT1G79160.1)%3B Has 136 Blast hits to 134 proteins in 17 species: Archae - 0%3B Bacteria - 0%3B Metazoa - 0%3B Fungi - 4%3B Plants - 131%3B Viruses - 1%3B Other Eukaryotes - 0 (sou /.../CBI BLink).	LOC_Os04g52700	expressed protein
TraesCS4B02G393800	7.84418	1.44398e-06	3.43573e-05	Up				LOC_Os12g36000	expressed protein
TraesCS5A02G163500	7.83964	4.13079e-09	1.92228e-07	Up	AT4G31830		unknown protein%3B Has 42 Blast hits to 42 proteins in 10 species: Archae - 0%3B Bacteria - 0%3B Metazoa - 0%3B Fungi - 0%3B Plants - 42%3B Viruses - 0%3B Other Eukaryotes - 0 (source: NCBI BLink).	LOC_Os09g04100	expressed protein
TraesCS1A02G084600	7.83485	1.17089e-10	7.54675e-09	Up
TraesCS4D02G282400	7.81233	8.5689e-20	2.62741e-17	Up				LOC_Os03g07180	embryonic protein DC-8
TraesCS5A02G517400	7.80596	7.37562e-14	9.04024e-12	Up	AT1G56580	SVB	Protein of unknown function%2C DUF538	LOC_Os07g02850	DUF538 domain containing protein
TraesCS2A02G019500	7.78699	1.47284e-16	2.83629e-14	Up				LOC_Os10g04540	expressed protein
TraesCS3D02G144500	7.74398	5.66593e-05	0.000800155	Up	AT1G65480	FT	Protein FLOWERING LOCUS T	LOC_Os01g11940	osFTL1 FT-Like1 homologous to Flowering Locus T gene; contains Pfam profile PF01161: Phosphatidylethanolamine-binding protein
TraesCS2B02G539000	7.73616	3.14174e-10	1.8581e-08	Up				LOC_Os08g32120	expressed protein
TraesCS7D02G365500	7.73497	3.94066e-06	8.18237e-05	Up	AT5G56550	OXS3	oxidative stress 3	LOC_Os06g36390	expressed protein
TraesCS6A02G225400	7.72021	3.16483e-07	9.1503e-06	Up	AT1G21240	WAK3	Wall-associated receptor kinase 3	LOC_Os02g41500	OsWAK13 - OsWAK receptor-like protein kinase
TraesCS2A02G413800	7.71074	2.27991e-08	8.84572e-07	Up	AT1G02070		unknown protein%3B BEST Arabidopsis thaliana protein match is: unknown protein (TAIR:AT3G60520.1)%3B Has 98 Blast hits to 98 proteins in 13 species: Archae - 0%3B Bacteria - 0%3B Metazoa - 0%3B Fungi - 0%3B Plants - 98%3B Viruses - 0%3B Other Eukaryotes - 0 (source /.../ BLink).	LOC_Os04g46600	zinc finger protein
TraesCS6B02G165000	7.68349	2.76668e-05	0.000438202	Up
TraesCS5D02G447000	7.67772	2.51258e-27	1.77655e-24	Up	AT3G19690		CAP (Cysteine-rich secretory proteins%2C Antigen 5%2C and Pathogenesis-related 1 protein) superfamily protein	LOC_Os07g03710	SCP-like extracellular protein
TraesCS5A02G475300	7.66142	4.62473e-05	0.000675882	Up				LOC_Os01g07300	uncharacterized 50.6 kDa protein in the 5region of gyrA and gyrB
TraesCS1D02G293000	7.65431	2.44464e-13	2.72815e-11	Up	AT5G01670		NAD(P)-linked oxidoreductase superfamily protein	LOC_Os05g39690	oxidoreductase
TraesCS7B02G258000	7.6539	1.97529e-05	0.00032673	Up	AT4G15550	UGT75D1	UDP-glycosyltransferase 75D1	LOC_Os06g39330	UDP-glucoronosyl and UDP-glucosyl transferase domain containing protein
TraesCS1A02G126600	7.65109	4.23543e-05	0.000627103	Up
TraesCS5A02G247600	7.64644	0.000317282	0.00336631	Up	AT1G28220	PUP3	Purine permease 3	LOC_Os09g29210	purine permease
TraesCS5A02G465800	7.64404	1.10023e-13	1.30303e-11	Up				LOC_Os01g18530	expressed protein
TraesCS2B02G545300	7.6401	6.58494e-22	2.55695e-19	Up	AT2G20340	ELI5	Tyrosine decarboxylase 1	LOC_Os08g04540	decarboxylase
TraesCS7D02G014300	7.62621	6.80209e-10	3.78211e-08	Up	AT4G33467		unknown protein%3B Has 25 Blast hits to 25 proteins in 9 species: Archae - 0%3B Bacteria - 0%3B Metazoa - 0%3B Fungi - 0%3B Plants - 25%3B Viruses - 0%3B Other Eukaryotes - 0 (source: NCBI BLink).	LOC_Os12g08700	expressed protein
TraesCS2D02G085700	7.61328	0.00265926	0.0187816	Up	AT1G32100	PRR1	Pinoresinol reductase 1	LOC_Os12g16220	nmrA-like family domain containing protein
TraesCS5B02G415400	7.60814	1.35579e-14	1.87801e-12	Up	AT2G43000	JUB1	Transcription factor JUNGBRUNNEN 1	LOC_Os03g56580	no apical meristem protein
TraesCS5B02G033300	7.60626	1.85638e-06	4.2618e-05	Up	AT3G03341		unknown protein%3B Has 30201 Blast hits to 17322 proteins in 780 species: Archae - 12%3B Bacteria - 1396%3B Metazoa - 17338%3B Fungi - 3422%3B Plants - 5037%3B Viruses - 0%3B Other Eukaryotes - 2996 (source: NCBI BLink).	LOC_Os01g45659	expressed protein
TraesCS2A02G074400	7.60586	0.000215978	0.0024451	Up				LOC_Os03g46510	OsFBX103 - F-box domain containing protein
TraesCS7A02G187000	7.59144	0.00179069	0.0136537	Up	AT1G69640	SBH1	Sphinganine C(4)-monooxygenase 1	LOC_Os06g12250	sphingolipid C4-hydroxylase SUR2
TraesCS1D02G407200	7.58733	2.20567e-05	0.000359131	Up	AT1G09970	LRR XI-23	Leucine-rich receptor-like protein kinase family protein	LOC_Os12g43640	receptor-like protein kinase HAIKU2 precursor
TraesCS4B02G172700	7.58072	2.27171e-36	3.84348e-33	Up	AT1G09780	PGM1	2%2C3-bisphosphoglycerate-independent phosphoglycerate mutase 1	LOC_Os03g21260	2
TraesCS4D02G186100	7.57818	1.63948e-24	8.53482e-22	Up	AT4G16160	OEP162	Outer envelope pore protein 16-2%2C chloroplastic	LOC_Os03g19290	mitochondrial import inner membrane translocase subunit Tim17
TraesCS6A02G280200	7.5689	8.11727e-18	1.90366e-15	Up	AT1G32450	NPF7.3	Protein NRT1/ PTR FAMILY 7.3	LOC_Os02g48570	peptide transporter PTR2
TraesCS2B02G471600	7.56784	6.81606e-09	3.01773e-07	Up
TraesCS1D02G289000	7.56595	2.99062e-11	2.16463e-09	Up				LOC_Os05g38940	expressed protein
TraesCSU02G038200	7.5426	1.78624e-09	9.1137e-08	Up	AT5G48930	HST	Shikimate O-hydroxycinnamoyltransferase	LOC_Os03g08720	transferase family protein
TraesCS6B02G119600	7.5345	5.89206e-13	6.0482e-11	Up				LOC_Os03g51350	expressed protein
TraesCS5D02G394700	7.52771	2.23856e-05	0.000363861	Up	AT4G14819		Protein of unknown function (DUF1677)	LOC_Os03g53540	expressed protein
TraesCS6B02G141000	7.52387	0.000114683	0.00144453	Up	AT1G36730		Probable eukaryotic translation initiation factor 5-1	LOC_Os06g48350	CPuORF14 - conserved peptide uORF-containing transcript
TraesCS2D02G581900	7.51081	0.00257303	0.0182774	Up	AT1G65880	AAE20	Benzoate--CoA ligase%2C peroxisomal	LOC_Os03g03790	AMP-binding domain containing protein
TraesCS5B02G181900	7.50812	7.30151e-12	5.93301e-10	Up				LOC_Os09g15540	OsFBX312 - F-box domain containing protein
TraesCS5A02G243900	7.50166	2.50401e-11	1.84053e-09	Up	AT1G05510		Protein of unknown function (DUF1264)	LOC_Os05g49440	DUF1264 domain containing protein
TraesCS4D02G206500	7.49908	7.53518e-14	9.20011e-12	Up	AT1G07645	ATDSI-1VOC	dessication-induced 1VOC superfamily protein	LOC_Os03g16940	glyoxalase family protein
TraesCS2B02G545200	7.49468	2.74062e-07	8.04539e-06	Up	AT2G20340	ELI5	Tyrosine decarboxylase 1	LOC_Os08g04540	decarboxylase
TraesCS4A02G431600	7.49326	4.27767e-15	6.42301e-13	Up	AT2G20340	ELI5	Tyrosine decarboxylase 1	LOC_Os08g04540	decarboxylase
TraesCS5A02G018700	7.4872	0.000903728	0.00791648	Up	AT4G11650	OSM34	Osmotin-like protein OSM34	LOC_Os12g43440	thaumatin
TraesCS3B02G489800	7.48667	0.0002464	0.002729	Up	AT3G09220	LAC7	Laccase-7	LOC_Os11g42200	laccase precursor protein
TraesCS6B02G022500	7.4745	6.12071e-11	4.16006e-09	Up	AT5G13930	CHS	Chalcone synthase	LOC_Os05g12240	chalcone synthase
TraesCS1B02G080400	7.46253	1.09913e-06	2.71431e-05	Up	AT2G36970	UGT86A1	UDP-glycosyltransferase 86A1	LOC_Os10g30560	UDP-glucoronosyl and UDP-glucosyl transferase domain containing protein
TraesCS1A02G020900	7.45537	2.09251e-06	4.7356e-05	Up				LOC_Os03g60840	BBTI13 - Bowman-Birk type bran trypsin inhibitor precursor
TraesCS2A02G468500	7.45004	1.2271e-08	5.11722e-07	Up				LOC_Os04g53300	polyphenol oxidase
TraesCS4A02G259400	7.44693	6.55407e-28	4.96777e-25	Up	AT5G39050	PMAT1	Phenolic glucoside malonyltransferase 1	LOC_Os02g28340	transferase family protein
TraesCS1B02G368900	7.43429	1.0747e-10	6.99335e-09	Up	AT5G11770		NADH dehydrogenase	LOC_Os01g52214	ubiquinone oxidoreductase
TraesCS3A02G061600	7.4271	0.000253703	0.00279764	Up	AT2G30770	CYP71A13	cytochrome P450%2C family 71%2C subfamily A%2C polypeptide 13	LOC_Os08g01510	cytochrome P450
TraesCS3B02G455800	7.42664	5.22297e-09	2.37444e-07	Up	AT3G14240		Subtilase family protein	LOC_Os08g35090	OsSub56 - Putative Subtilisin homologue
TraesCS4D02G292500	7.40803	4.91154e-07	1.34844e-05	Up	AT5G21950		alpha/beta-Hydrolases superfamily protein	LOC_Os03g08100	hydrolase
TraesCS3A02G488300	7.39583	2.739e-08	1.0481e-06	Up	AT3G09270	GSTU8	Glutathione S-transferase U8	LOC_Os01g72120	glutathione S-transferase
TraesCS1D02G101700	7.37378	0.0013032	0.0105931	Up				LOC_Os05g05930	peripheral-type benzodiazepine receptor
TraesCS6D02G110400	7.36982	9.26547e-07	2.34724e-05	Up	AT2G22800	HAT9	Homeobox-leucine zipper protein HAT9	LOC_Os02g05640	homeobox associated leucine zipper
TraesCS2A02G112500	7.36777	2.70352e-08	1.03745e-06	Up	AT2G47710		Adenine nucleotide alpha hydrolases-like superfamily protein	LOC_Os07g47620	universal stress protein domain containing protein
TraesCS3B02G567100	7.36753	0.000431045	0.0043313	Up	AT4G02890	UBQ14	Polyubiquitin 11	LOC_Os04g53620	ubiquitin family protein
TraesCS2A02G207600	7.35579	7.3816e-13	7.40082e-11	Up				LOC_Os03g21600	expressed protein
TraesCS5D02G281200	7.35132	1.88405e-13	2.13524e-11	Up	AT1G21270	WAK2	Wall-associated receptor kinase 2	LOC_Os02g56630	OsWAK24 - OsWAK receptor-like protein kinase
TraesCS7A02G556100	7.34889	5.43215e-21	1.92762e-18	Up	AT2G17450	ATL44	RING-H2 finger protein ATL44	LOC_Os02g58540	RING-H2 finger protein
TraesCS7D02G553000	7.34543	0.00555646	0.0333177	Up	AT1G48410	AGO1	Protein argonaute 1	LOC_Os06g51310	PAZ domain containing protein
TraesCS3A02G045400	7.34049	9.2526e-06	0.000170521	Up				LOC_Os01g37320	expressed protein
TraesCS6A02G120600	7.34048	3.8013e-12	3.29212e-10	Up	AT4G37790	HAT22	Homeobox-leucine zipper protein HAT22	LOC_Os02g05640	homeobox associated leucine zipper
TraesCS2B02G400000	7.33978	4.7537e-10	2.71322e-08	Up	AT1G08630	THA1	Probable low-specificity L-threonine aldolase 1	LOC_Os04g43650	L-allo-threonine aldolase
TraesCS5B02G333100	7.33634	1.60359e-08	6.49846e-07	Up
TraesCS3A02G412500	7.33271	7.59276e-17	1.53591e-14	Up	AT5G06730	PER54	Peroxidase 54	LOC_Os03g13180	peroxidase precursor
TraesCS4A02G297000	7.33238	1.13869e-06	2.79426e-05	Up	AT1G56150	SAUR71	Auxin-responsive protein SAUR71	LOC_Os03g45860	OsSAUR17 - Auxin-responsive SAUR gene family member
TraesCS4B02G275300	7.32033	2.12066e-10	1.29378e-08	Up	AT3G22490		Seed maturation protein	LOC_Os03g06360	late embryogenesis abundant protein D-34
TraesCS5D02G099100	7.31572	2.48813e-07	7.41787e-06	Up	AT5G49620	MYB78	myb domain protein 78	LOC_Os12g37690	MYB family transcription factor
TraesCS7B02G253700	7.30821	1.16624e-21	4.45551e-19	Up	AT1G11680	CYP51G1	Sterol 14-demethylase	LOC_Os02g02230	cytochrome P450
TraesCS7B02G356600	7.29993	0.000539059	0.0052031	Up	AT3G22360	AOX1B	Ubiquinol oxidase 1b%2C mitochondrial	LOC_Os04g51150	transposon protein
TraesCS5A02G267900	7.2944	2.02159e-12	1.84526e-10	Up	AT1G09310		Protein of unknown function%2C DUF538	LOC_Os07g02850	DUF538 domain containing protein
TraesCS4A02G390000	7.28836	1.00098e-09	5.35815e-08	Up				LOC_Os06g05120	expressed protein
TraesCS5A02G082700	7.28813	4.4791e-07	1.24123e-05	Up	AT3G55390		CASP-like protein 4C1	LOC_Os12g38100	membrane associated DUF588 domain containing protein
TraesCS7B02G052600	7.28791	2.79087e-05	0.000441147	Up	AT1G15950	CCR1	Cinnamoyl-CoA reductase 1	LOC_Os09g25150	cinnamoyl-CoA reductase
TraesCS7A02G302800	7.28599	2.09102e-05	0.000342702	Up	AT1G15910	FDM1	Factor of DNA methylation 1	LOC_Os02g19130	transcription factor X1
TraesCS1D02G153700	7.28333	1.99081e-06	4.5298e-05	Up	AT2G31160	LSH3	Protein LIGHT-DEPENDENT SHORT HYPOCOTYLS 3	LOC_Os10g33780	DUF640 domain containing protein
TraesCS2A02G558000	7.28293	4.49795e-06	9.19049e-05	Up	AT3G12500	CHI-B	Basic endochitinase B	LOC_Os05g33140	CHIT5 - Chitinase family protein precursor
TraesCS5B02G241900	7.28139	1.04835e-10	6.85013e-09	Up	AT1G05510		Protein of unknown function (DUF1264)	LOC_Os05g49440	DUF1264 domain containing protein
TraesCS3D02G084600	7.27192	5.30225e-07	1.444e-05	Up	AT2G45510	CYP704A2	cytochrome P450%2C family 704%2C subfamily A%2C polypeptide 2	LOC_Os04g48460	cytochrome P450
TraesCS3A02G151300	7.2676	1.53635e-08	6.25539e-07	Up	AT1G64110		P-loop containing nucleoside triphosphate hydrolases superfamily protein	LOC_Os01g12660	AAA-type ATPase family protein
TraesCS2A02G126300	7.26506	8.35688e-08	2.83894e-06	Up	AT4G02420	LECRK44	L-type lectin-domain containing receptor kinase IV.4	LOC_Os07g38800	lectin-like receptor kinase
TraesCS3D02G440500	7.25958	0.000507073	0.00494927	Up	AT1G02850	BGLU11	Beta-glucosidase 11	LOC_Os05g30350	Os5bglu22 - beta-glucosidase homologue
TraesCS7D02G554100	7.25933	2.21675e-08	8.63247e-07	Up	AT1G20823	ATL80	RING-H2 finger protein ATL80	LOC_Os02g58540	RING-H2 finger protein
TraesCS7A02G004800	7.25466	1.39325e-11	1.07234e-09	Up	AT3G14460		Putative disease resistance protein At3g14460	LOC_Os10g04540	expressed protein
TraesCS1A02G374400	7.25068	0.0016736	0.0129379	Up	AT3G18280		Bifunctional inhibitor/lipid-transfer protein/seed storage 2S albumin superfamily protein	LOC_Os05g47730	LTPL153 - Protease inhibitor/seed storage/LTP family protein precursor
TraesCS3D02G061900	7.24821	4.36742e-09	2.01852e-07	Up	AT2G30770	CYP71A13	cytochrome P450%2C family 71%2C subfamily A%2C polypeptide 13	LOC_Os08g01510	cytochrome P450
TraesCS2B02G521800	7.24513	3.48637e-50	1.37633e-46	Up	AT1G78290	SRK2C	Serine/threonine-protein kinase SRK2C	LOC_Os03g27280	CAMK_CAMK_like.19 - CAMK includes calcium/calmodulin depedent protein kinases
TraesCS7D02G297700	7.24378	1.47346e-07	4.65039e-06	Up	AT4G12420	SKU5	Monocopper oxidase-like protein SKU5	LOC_Os08g05820	monocopper oxidase
TraesCS5B02G566400	7.23074	4.25357e-08	1.55602e-06	Up	AT1G04560		AWPM-19-like family protein	LOC_Os07g24000	AWPM-19-like membrane family protein
TraesCS5A02G274100	7.2299	2.82514e-08	1.07542e-06	Up	AT1G21270	WAK2	Wall-associated receptor kinase 2	LOC_Os02g56630	OsWAK24 - OsWAK receptor-like protein kinase
TraesCS6B02G125800	7.22233	0.000190646	0.00220683	Up	AT1G13080	CYP71B2	Cytochrome P450 71B2	LOC_Os12g16720	cytochrome P450 71A1
TraesCS5D02G420800	7.22004	1.7769e-10	1.10107e-08	Up	AT2G43000	JUB1	Transcription factor JUNGBRUNNEN 1	LOC_Os03g56580	no apical meristem protein
TraesCS5D02G433200	7.21852	1.83772e-06	4.22576e-05	Up				LOC_Os11g26760	dehydrin
TraesCS5A02G411800	7.21326	4.03051e-09	1.88023e-07	Up	AT2G43000	JUB1	Transcription factor JUNGBRUNNEN 1	LOC_Os03g56580	no apical meristem protein
TraesCS6A02G295000	7.20825	2.16436e-07	6.57259e-06	Up	AT5G07330		unknown protein%3B FUNCTIONS IN: molecular_function unknown%3B INVOLVED IN: biological_process unknown%3B LOCATED IN: mitochondrion%3B BEST Arabidopsis thaliana protein match is: unknown protein (TAIR:AT1G63060.1)%3B Has 1807 Blast hits to 1807 proteins in 27 /.../ies: Archae - 0%3B Bacteria - 0%3B Metazoa - 736%3B Fungi - 347%3B Plants - 385%3B Viruses - 0%3B Other Eukaryotes - 339 (source: NCBI…	LOC_Os11g32890	expressed protein
TraesCS7D02G026300	7.20398	5.80577e-11	3.96592e-09	Up	AT1G32560		Late embryogenesis abundant protein%2C group 1 protein	LOC_Os06g02040	late embryogenesis abundant group 1
TraesCS6B02G261000	7.20062	1.40155e-08	5.77857e-07	Up	AT5G22300	NIT4	Bifunctional nitrilase/nitrile hydratase NIT4	LOC_Os02g42350	nitrilase
TraesCS7A02G229400	7.19531	0.000109821	0.00139441	Up	AT1G18100	MFT	Protein MOTHER of FT and TF 1	LOC_Os06g30370	osMFT1 MFT-Like1 homologous to Mother of FT and TFL1 gene; contains Pfam profile PF01161: Phosphatidylethanolamine-binding protein
TraesCS7B02G112400	7.18362	3.52521e-09	1.67419e-07	Up	AT1G66230	MYB20	myb domain protein 20	LOC_Os06g14670	ODORANT1
TraesCS2B02G174400	7.16962	2.37644e-10	1.43504e-08	Up	AT1G48130	PER1	1-Cys peroxiredoxin PER1	LOC_Os07g44430	peroxiredoxin
TraesCS2D02G429600	7.15467	1.18693e-13	1.3918e-11	Up	AT1G16860		Uncharacterized membrane protein At1g16860	LOC_Os08g13350	expressed protein
TraesCS3A02G012600	7.15108	0.000250282	0.00276475	Up	AT5G38940		Germin-like protein subfamily 1 member 11	LOC_Os08g09020	Cupin domain containing protein
TraesCS5A02G004400	7.14855	2.47893e-09	1.22036e-07	Up	AT5G62680	NPF2.11	Protein NRT1/ PTR FAMILY 2.11	LOC_Os12g44110	ligA
TraesCS1B02G248600	7.14615	3.7419e-24	1.83695e-21	Up	AT1G12920	ERF1-2	Eukaryotic peptide chain release factor subunit 1-2	LOC_Os01g71270	eukaryotic peptide chain release factor subunit 1-1
TraesCS2B02G439800	7.13809	3.02246e-08	1.14364e-06	Up
TraesCS4B02G055800	7.12336	1.10909e-17	2.55672e-15	Up	AT4G01070	UGT72B1	UDP-glycosyltransferase 72B1	LOC_Os02g14680	UDP-glucoronosyl and UDP-glucosyl transferase domain containing protein
TraesCS5D02G042300	7.12193	5.25831e-10	2.98505e-08	Up	AT3G03341		unknown protein%3B Has 30201 Blast hits to 17322 proteins in 780 species: Archae - 12%3B Bacteria - 1396%3B Metazoa - 17338%3B Fungi - 3422%3B Plants - 5037%3B Viruses - 0%3B Other Eukaryotes - 2996 (source: NCBI BLink).	LOC_Os01g45659	expressed protein
TraesCS6B02G256200	7.10325	5.85798e-08	2.07406e-06	Up	AT1G21230	WAK5	Wall-associated receptor kinase 5	LOC_Os02g41500	OsWAK13 - OsWAK receptor-like protein kinase
TraesCS5D02G173900	7.10208	1.78882e-15	2.89221e-13	Up	AT5G48220		Aldolase-type TIM barrel family protein	LOC_Os09g08130	indole-3-glycerol phosphate synthase
TraesCS4D02G349500	7.06256	6.16333e-10	3.4431e-08	Up	AT1G76680	OPR1	12-oxophytodienoate reductase 1	LOC_Os06g11290	12-oxophytodienoate reductase
TraesCS6B02G284300	7.06205	0.000573812	0.00547441	Up	AT2G46680	ATHB-7	Homeobox-leucine zipper protein ATHB-7	LOC_Os02g43330	homeobox associated leucine zipper
TraesCS6D02G332900	7.04561	1.99429e-19	5.88633e-17	Up
TraesCS2A02G058100	7.04473	1.37706e-06	3.30307e-05	Up	AT5G24090	CHIB1	Acidic endochitinase	LOC_Os11g47580	glycosyl hydrolase
TraesCS6B02G383500	7.03632	1.17505e-33	1.54627e-30	Up				LOC_Os11g26790	dehydrin
TraesCS2A02G577800	7.03245	2.02051e-23	9.24806e-21	Up	AT3G56630	CYP94D2	cytochrome P450%2C family 94%2C subfamily D%2C polypeptide 2	LOC_Os03g12260	cytochrome P450 protein
TraesCS6B02G059000	7.02989	1.6532e-05	0.000280858	Up	AT5G66110	HIPP27	Heavy metal transport/detoxification superfamily protein	LOC_Os04g17100	heavy metal-associated domain containing protein
TraesCS1A02G050200	7.00382	7.49297e-14	9.16037e-12	Up	AT2G20340	ELI5	Tyrosine decarboxylase 1	LOC_Os08g04540	decarboxylase
TraesCS2A02G527900	7.00083	0.000156378	0.00186648	Up				LOC_Os01g02360	resistance-related receptor-like kinase
TraesCS4A02G347600	6.99269	9.45142e-05	0.00123105	Up	AT1G21230	WAK5	Wall-associated receptor kinase 5	ChrUn.fgenesh.mRNA	expressed protein
TraesCS4D02G145600	6.99099	9.94436e-07	2.49586e-05	Up	AT5G12020	HSP17.6	17.6 kDa class II heat shock protein	LOC_Os01g08860	hsp20/alpha crystallin family protein
TraesCS3B02G119500	6.98692	1.82028e-24	9.37306e-22	Up	AT2G37710	LECRK41	L-type lectin-domain containing receptor kinase IV.1	LOC_Os02g42780	lectin receptor-type protein kinase
TraesCS5D02G168500	6.98254	5.69403e-07	1.537e-05	Up	AT4G31830		unknown protein%3B Has 42 Blast hits to 42 proteins in 10 species: Archae - 0%3B Bacteria - 0%3B Metazoa - 0%3B Fungi - 0%3B Plants - 42%3B Viruses - 0%3B Other Eukaryotes - 0 (source: NCBI BLink).	LOC_Os09g04100	expressed protein
TraesCS4A02G119900	6.9637	3.84815e-06	8.00785e-05	Up	AT4G16160	OEP162	Outer envelope pore protein 16-2%2C chloroplastic	LOC_Os03g19290	mitochondrial import inner membrane translocase subunit Tim17
TraesCS5D02G234600	6.95888	5.63415e-10	3.1718e-08	Up	AT3G28920	ZHD9	Zinc-finger homeodomain protein 9	LOC_Os09g24820	ZF-HD protein dimerisation region containing protein
TraesCS3D02G141100	6.94461	2.00888e-44	5.28703e-41	Up	AT3G15353	MT3	metallothionein 3	LOC_Os05g11320	metallothionein-like protein 3B
TraesCS3D02G338100	6.94171	8.66958e-05	0.00114254	Up	AT3G10910	ATL72	RING-H2 finger protein ATL72	LOC_Os01g60730	RING-H2 finger protein
TraesCS3A02G537900	6.94148	3.35409e-05	0.000516391	Up	AT3G24790		Protein kinase superfamily protein	LOC_Os05g03460	protein kinase
TraesCS4D02G173700	6.93558	0.00673289	0.038511	Up	AT1G14320	RPL10A	60S ribosomal protein L10-1	LOC_Os11g11390	ribosomal protein
TraesCS7D02G239800	6.924	7.825e-10	4.28053e-08	Up	AT5G56270	WRKY2	Probable WRKY transcription factor 2	LOC_Os08g38990	WRKY30
TraesCS1D02G422600	6.90921	3.44421e-10	2.02076e-08	Up	AT3G18570		Oleosin family protein	LOC_Os05g50110	oleosin
TraesCS2D02G467500	6.90035	4.97478e-07	1.36412e-05	Up				LOC_Os02g33380	pectinesterase inhibitor domain containing protein
TraesCS2D02G571600	6.87898	4.57038e-06	9.32239e-05	Up	AT3G12500	CHI-B	Basic endochitinase B	LOC_Os05g33140	CHIT5 - Chitinase family protein precursor
TraesCS2A02G367700	6.87721	1.49816e-05	0.0002578	Up	AT2G33380	PXG3	Probable peroxygenase 3	LOC_Os04g43200	caleosin related protein
TraesCS1D02G256500	6.87565	0.00281941	0.0196896	Up	AT5G40010	AATP1	AAA-ATPase 1	LOC_Os12g44210	ATPase
TraesCS5D02G439500	6.86791	4.83645e-09	2.21583e-07	Up				LOC_Os08g42680	expressed protein
TraesCS7D02G085900	6.86229	2.11585e-08	8.28382e-07	Up	AT1G21240	WAK3	Wall-associated receptor kinase 3	LOC_Os02g02120	OsWAK11 - OsWAK receptor-like protein kinase
TraesCS5D02G224200	6.85305	9.14547e-09	3.92258e-07	Up	AT1G17290	ALAAT1	Alanine aminotransferase 1%2C mitochondrial	LOC_Os09g26380	aminotransferase
TraesCS1B02G445100	6.84731	4.5342e-08	1.65103e-06	Up	AT3G18570		Oleosin family protein	LOC_Os05g50110	oleosin
TraesCS7A02G551200	6.82992	0.00389756	0.0253521	Up	AT4G38260		Protein of unknown function (DUF833)	LOC_Os09g15480	Ser/Thr-rich protein T10 in DGCR region
TraesCS6B02G160900	6.82366	2.92696e-08	1.11105e-06	Up	AT1G15330	PV42A	SNF1-related protein kinase regulatory subunit gamma-like PV42a	LOC_Os02g06410	CBS domain containing membrane protein
TraesCS2D02G198000	6.8071	0.00233355	0.0169032	Up	AT1G51200	SAP2	Zinc finger A20 and AN1 domain-containing stress-associated protein 2	LOC_Os08g33880	zinc finger A20 and AN1 domain-containing stress-associated protein
TraesCS4A02G475300	6.80349	9.56177e-07	2.41005e-05	Up
TraesCS7A02G205100	6.80191	3.19712e-06	6.81778e-05	Up	AT1G66230	MYB20	myb domain protein 20	LOC_Os06g14670	ODORANT1
TraesCS2B02G075000	6.79755	1.67427e-11	1.27006e-09	Up	AT4G38650		Glycosyl hydrolase family 10 protein	LOC_Os05g23924	glycosyl hydrolase family 10 protein
TraesCS5D02G521400	6.77426	1.99493e-08	7.86239e-07	Up				LOC_Os09g32310	expressed protein
TraesCS7A02G338400	6.76612	0.0015957	0.0124628	Up				LOC_Os10g04380	expressed protein
TraesCS1B02G256400	6.76428	1.91217e-05	0.000317843	Up				LOC_Os04g01560	expressed protein
TraesCS3D02G455000	6.74934	0.000507119	0.00494927	Up	AT3G07220	FHA2	FHA domain-containing protein FHA2	LOC_Os08g41710	FHA domain containing protein
TraesCS3D02G420500	6.74426	2.53321e-06	5.56612e-05	Up	AT3G07200		RING/U-box superfamily protein	LOC_Os01g69040	zinc finger
TraesCS6B02G193500	6.74181	0.00118079	0.00978698	Up	AT4G22130	SRF8	Protein STRUBBELIG-RECEPTOR FAMILY 8	LOC_Os02g10110	Leucine Rich Repeat family protein
TraesCS3A02G101700	6.73648	4.66601e-06	9.48886e-05	Up	AT2G37710	LECRK41	L-type lectin-domain containing receptor kinase IV.1	LOC_Os07g38820	lectin-like receptor kinase
TraesCS5D02G001800	6.72568	7.98298e-05	0.00106664	Up				LOC_Os03g42520	expressed protein
TraesCS5A02G533900	6.71469	0.000635604	0.00594158	Up	AT5G57150	BHLH35	basic helix-loop-helix (bHLH) DNA-binding superfamily protein	LOC_Os04g23550	basic helix-loop-helix family protein
TraesCS3D02G464000	6.70349	5.89677e-06	0.000116194	Up				LOC_Os04g11790	OsFBX120 - F-box domain containing protein
TraesCS7B02G299600	6.70334	8.54833e-07	2.18661e-05	Up	AT4G36280		Histidine kinase-%2C DNA gyrase B-%2C and HSP90-like ATPase family protein	LOC_Os06g41710	CW-type Zinc Finger
TraesCS7A02G209800	6.69936	6.70144e-47	2.11644e-43	Up	AT4G28390	AAC3	ADP%2CATP carrier protein 3%2C mitochondrial	LOC_Os05g23720	mitochondrial carrier protein
TraesCS6B02G091000	6.69527	4.28955e-05	0.000633544	Up	AT1G61680	TPS14	S-(+)-linalool synthase%2C chloroplastic	LOC_Os02g02930	terpene synthase
TraesCS7A02G448600	6.69416	2.63669e-05	0.000420283	Up	AT4G10270		Wound-responsive family protein	LOC_Os06g46970	wound induced protein
TraesCS6A02G058300	6.69184	2.0297e-25	1.20947e-22	Up	AT3G09220	LAC7	Laccase-7	LOC_Os10g20610	laccase-15 precursor
TraesCS6B02G022400	6.68862	1.64339e-14	2.25658e-12	Up	AT4G35160		O-methyltransferase family protein	LOC_Os11g33300	O-methyltransferase
TraesCS2B02G493200	6.67193	9.75745e-06	0.000178574	Up	AT3G12145	FLR1	Leucine-rich repeat (LRR) family protein	LOC_Os05g01430	polygalacturonase inhibitor 2 precursor
TraesCS6B02G217900	6.66789	9.3286e-05	0.00121742	Up	AT3G62300	DUF7	DOMAIN OF UNKNOWN FUNCTION 724 7	LOC_Os11g19730	expressed protein
TraesCS7D02G353900	6.66648	5.50872e-07	1.4955e-05	Up	AT3G24503	ALDH2C4	Aldehyde dehydrogenase family 2 member C4	LOC_Os01g40860	aldehyde dehydrogenase
TraesCS6A02G120300	6.66204	1.76382e-07	5.45591e-06	Up	AT2G22800	HAT9	Homeobox-leucine zipper protein HAT9	LOC_Os02g05640	homeobox associated leucine zipper
TraesCS6D02G049600	6.65824	3.96204e-18	9.77571e-16	Up	AT5G66110	HIPP27	Heavy metal transport/detoxification superfamily protein	LOC_Os04g17100	heavy metal-associated domain containing protein
TraesCS1B02G307700	6.64763	5.11636e-08	1.83619e-06	Up	AT5G01670		NAD(P)-linked oxidoreductase superfamily protein	LOC_Os05g39690	oxidoreductase
TraesCS1B02G304800	6.64274	5.68674e-28	4.34513e-25	Up	AT5G01300		PEBP (phosphatidylethanolamine-binding protein) family protein	LOC_Os05g39250	phosphatidylethanolamine-binding protein
TraesCS5A02G208500	6.63601	0.000438818	0.00439588	Up	AT1G13570		F-box/FBD/LRR-repeat protein At1g13570	LOC_Os09g27090	OsFBLD9 - F-box
TraesCS4A02G245300	6.62624	0.00201688	0.0150383	Up	AT1G47530		MATE efflux family protein	LOC_Os03g42830	MATE efflux family protein
TraesCS5B02G241600	6.6027	5.85242e-05	0.000822325	Up	AT3G63470	SCPL40	Serine carboxypeptidase-like 40	LOC_Os09g28830	OsSCP42 - Putative Serine Carboxypeptidase homologue
TraesCS6B02G187900	6.58065	2.3158e-07	6.96549e-06	Up	AT2G19130		G-type lectin S-receptor-like serine/threonine-protein kinase At2g19130	LOC_Os01g66640	S-domain receptor-like protein kinase
TraesCS7B02G128800	6.57807	2.43432e-08	9.39478e-07	Up	AT4G02340		alpha/beta-Hydrolases superfamily protein	LOC_Os05g19150	hydrolase
TraesCS4D02G304100	6.56707	0.000212424	0.00241265	Up	AT1G78230		Outer arm dynein light chain 1 protein	LOC_Os03g09070	leucine rich repeat domain containing protein
TraesCS1A02G295800	6.5633	5.20905e-11	3.59459e-09	Up	AT5G01300		PEBP (phosphatidylethanolamine-binding protein) family protein	LOC_Os05g39250	phosphatidylethanolamine-binding protein
TraesCS5A02G112600	6.55755	0.00183894	0.0139431	Up	AT5G64750	ABR1	Ethylene-responsive transcription factor ABR1	LOC_Os11g06770	ethylene-responsive transcription factor ERF110
TraesCS3A02G508600	6.55093	1.8721e-28	1.54238e-25	Up	AT4G24220	VEP1	3-oxo-Delta(4%2C5)-steroid 5-beta-reductase	LOC_Os03g32170	NAD dependent epimerase/dehydratase family protein
TraesCS5A02G183800	6.55028	1.87409e-05	0.000312389	Up	AT1G28440	HSL1	Receptor-like protein kinase HSL1	LOC_Os09g15700	receptor-like protein kinase 5 precursor
TraesCS6A02G350500	6.54968	1.82475e-28	1.52998e-25	Up
TraesCS4B02G184800	6.5453	8.16947e-10	4.45097e-08	Up	AT4G16160	OEP162	Outer envelope pore protein 16-2%2C chloroplastic	LOC_Os03g19290	mitochondrial import inner membrane translocase subunit Tim17
TraesCS2B02G085500	6.54389	6.07857e-31	6.19269e-28	Up	AT1G19250	FMO1	Probable flavin-containing monooxygenase 1	LOC_Os04g14710	flavin-containing monooxygenase family protein
TraesCS6D02G110600	6.53449	0.00824861	0.0450523	Up	AT5G06710	HAT14	Homeobox-leucine zipper protein HAT14	LOC_Os02g05640	homeobox associated leucine zipper
TraesCS2A02G066000	6.52413	1.13215e-05	0.000202735	Up				LOC_Os02g18720	expressed protein
TraesCS3A02G062800	6.51865	0.000152095	0.0018241	Up	AT5G37870		Putative E3 ubiquitin-protein ligase SINA-like 6	LOC_Os01g03420	seven in absentia protein family protein
TraesCS3B02G446500	6.51673	3.39044e-15	5.21479e-13	Up	AT5G06730	PER54	Peroxidase 54	LOC_Os03g13180	peroxidase precursor
TraesCS2B02G481800	6.50642	4.73892e-05	0.000689805	Up	AT3G14580		Pentatricopeptide repeat-containing protein At3g14580%2C mitochondrial	LOC_Os04g52725	PPR repeat domain containing protein
TraesCS7A02G521000	6.50043	0.000125332	0.00155286	Up	AT2G27040	AGO4	Protein argonaute 4	LOC_Os01g16870	argonaute
TraesCS1B02G116200	6.49918	3.59676e-05	0.000546852	Up	AT2G22795		unknown protein%3B BEST Arabidopsis thaliana protein match is: unknown protein (TAIR:AT4G37820.1)%3B Has 799854 Blast hits to 188815 proteins in 4452 species: Archae - 4529%3B Bacteria - 144236%3B Metazoa - 287749%3B Fungi - 87083%3B Plants - 43826%3B Viruses - 3 /.../ther Eukaryotes - 228769 (source: NCBI BLink).	LOC_Os12g32200	expressed protein
TraesCS4D02G183800	6.49652	0.000431466	0.00433461	Up	AT5G13170	SWEET15	Bidirectional sugar transporter SWEET15	LOC_Os03g22590	nodulin MtN3 family protein
TraesCS4B02G023200	6.49615	9.08606e-07	2.30859e-05	Up				LOC_Os03g47280	VQ domain containing protein
TraesCS2A02G460500	6.49607	1.24798e-07	4.01633e-06	Up
TraesCS3D02G419600	6.47093	3.21291e-07	9.26667e-06	Up	AT5G25120	CYP71B11	Cytochrome P450 71B11	LOC_Os04g10160	cytochrome P450
TraesCS1D02G237100	6.4696	4.57802e-32	5.35493e-29	Up	AT1G12920	ERF1-2	Eukaryotic peptide chain release factor subunit 1-2	LOC_Os01g71270	eukaryotic peptide chain release factor subunit 1-1
TraesCS7B02G115600	6.4653	2.67617e-05	0.000425645	Up				LOC_Os07g49050	expressed protein
TraesCS5A02G369900	6.46173	1.66034e-10	1.03425e-08	Up				LOC_Os11g26780	dehydrin
TraesCS7B02G294500	6.44646	0.000354553	0.00368662	Up	AT4G31690	REM9	B3 domain-containing protein REM9	LOC_Os06g42630	B3 DNA binding domain containing protein
TraesCS3D02G254900	6.4395	2.06118e-05	0.000338641	Up	AT1G12940	NRT2.5	High affinity nitrate transporter 2.5	LOC_Os01g50820	transporter
TraesCS1B02G381700	6.42721	0.000144639	0.00174595	Up	AT3G15670		Late embryogenesis abundant protein (LEA) family protein	LOC_Os05g46480	late embryogenesis abundant protein
TraesCS3D02G133900	6.427	4.88617e-06	9.87722e-05	Up				LOC_Os10g09240	expressed protein
TraesCS1A02G006200	6.42009	1.66705e-07	5.20073e-06	Up	AT1G35710		Probable leucine-rich repeat receptor-like protein kinase At1g35710	LOC_Os10g02990	leucine-rich repeat receptor-like protein kinase 1
TraesCS3B02G355900	6.41895	2.56965e-07	7.62015e-06	Up				LOC_Os01g58100	polyphenol oxidase
TraesCS7B02G019300	6.41802	1.40335e-07	4.4588e-06	Up				LOC_Os06g06580	expressed protein
TraesCS1A02G207500	6.41787	2.32578e-05	0.000376205	Up	AT4G11410		NAD(P)-binding Rossmann-fold superfamily protein	LOC_Os10g40020	oxidoreductase
TraesCS7D02G226200	6.40815	4.67266e-08	1.69364e-06	Up	AT5G55470	NHX4	Sodium/hydrogen exchanger 4	LOC_Os06g21360	transporter
TraesCS2D02G221900	6.40701	4.11737e-05	0.000613372	Up	AT4G23180	CRK10	Cysteine-rich receptor-like protein kinase 10	LOC_Os07g35340	TKL_IRAK_DUF26-lc.14 - DUF26 kinases have homology to DUF26 containing loci
TraesCS6A02G015500	6.40156	0.0015876	0.0124098	Up	AT5G13930	CHS	Chalcone synthase	LOC_Os05g12240	chalcone synthase
TraesCS5B02G233500	6.39807	0.000295092	0.00317209	Up				LOC_Os02g42450	RIPER1 - Ripening-related family protein precursor
TraesCS3D02G061700	6.38924	0.00600724	0.0353254	Up	AT3G26300	CYP71B34	Cytochrome P450 71B34	LOC_Os08g01450	cytochrome P450
TraesCS5A02G411700	6.38841	2.19751e-08	8.5646e-07	Up	AT2G43000	JUB1	Transcription factor JUNGBRUNNEN 1	LOC_Os03g56580	no apical meristem protein
TraesCS1D02G053100	6.38735	0.0007062	0.00646748	Up	AT1G78750		F-box/FBD/LRR-repeat protein At1g78750	LOC_Os05g45570	expressed protein
TraesCS2A02G014000	6.3869	4.06533e-08	1.49234e-06	Up
TraesCS7A02G387000	6.37808	1.87144e-28	1.54238e-25	Up	AT2G20340	ELI5	Tyrosine decarboxylase 1	LOC_Os08g04540	decarboxylase
TraesCS6D02G152100	6.3771	4.94105e-05	0.000714615	Up	AT4G26470	CML21	Probable calcium-binding protein CML21	LOC_Os02g10470	EF hand family protein
TraesCS7D02G164300	6.37671	0.00168557	0.0130024	Up	AT5G03610		GDSL esterase/lipase At5g03610	LOC_Os04g55660	GDSL-like lipase/acylhydrolase
TraesCS2B02G089400	6.37599	1.78803e-20	5.96509e-18	Up				LOC_Os03g46510	OsFBX103 - F-box domain containing protein
TraesCS4B02G152200	6.35349	0.000739594	0.00671074	Up
TraesCS2D02G590600	6.35274	2.41016e-06	5.33589e-05	Up	AT3G47570		Probable LRR receptor-like serine/threonine-protein kinase At3g47570	LOC_Os11g47030	receptor protein kinase
TraesCSU02G114000	6.35187	6.07747e-06	0.000119291	Up	AT5G64330	RPT3	Root phototropism protein 3	LOC_Os02g35970	BTBN2 - Bric-a-Brac
TraesCS1A02G282500	6.34937	0.000751582	0.00679933	Up	AT5G58560		Probable phytol kinase 2%2C chloroplastic	LOC_Os11g01450	phosphatidate cytidylyltransferase
TraesCS2A02G189900	6.34798	5.35266e-06	0.0001067	Up	AT1G12440	SAP1	Zinc finger A20 and AN1 domain-containing stress-associated protein 1	LOC_Os08g33880	zinc finger A20 and AN1 domain-containing stress-associated protein
TraesCS5D02G310500	6.34748	4.92253e-32	5.68769e-29	Up	AT3G03080		Zinc-binding dehydrogenase family protein	LOC_Os12g12590	NADP-dependent oxidoreductase
TraesCS7D02G383500	6.34155	9.96927e-13	9.70759e-11	Up	AT2G20340	ELI5	Tyrosine decarboxylase 1	LOC_Os08g04540	decarboxylase
TraesCS3B02G500700	6.33371	0.00262114	0.0185691	Up	AT3G26922		F-box/LRR-repeat protein At3g26922	LOC_Os02g29150	OsFBO11 - F-box and other domain containing protein
TraesCS5A02G169500	6.33058	1.04826e-08	4.43933e-07	Up	AT5G48220		Aldolase-type TIM barrel family protein	LOC_Os09g08130	indole-3-glycerol phosphate synthase
TraesCS1D02G004600	6.32665	6.23796e-22	2.43219e-19	Up	AT3G14690	CYP72A15	Cytochrome P450 72A15	LOC_Os01g43700	cytochrome P450 72A1
TraesCS7A02G512500	6.32636	4.46554e-07	1.23784e-05	Up				LOC_Os07g36830	OsFBX250 - F-box domain containing protein
TraesCS3B02G452700	6.32546	0.00487928	0.0301462	Up	AT2G38880	NFYB1	Nuclear transcription factor Y subunit B-1	LOC_Os05g38820	histone-like transcription factor and archaeal histone
TraesCS1D02G296500	6.31767	4.63283e-33	5.70055e-30	Up	AT5G01300		PEBP (phosphatidylethanolamine-binding protein) family protein	LOC_Os05g39250	phosphatidylethanolamine-binding protein
TraesCS1A02G364400	6.31638	0.00116721	0.009699	Up	AT1G52690		Late embryogenesis abundant protein (LEA) family protein	LOC_Os05g46480	late embryogenesis abundant protein
TraesCS6B02G325000	6.31507	0.000108141	0.00137732	Up	AT5G07330		unknown protein%3B FUNCTIONS IN: molecular_function unknown%3B INVOLVED IN: biological_process unknown%3B LOCATED IN: mitochondrion%3B BEST Arabidopsis thaliana protein match is: unknown protein (TAIR:AT1G63060.1)%3B Has 1807 Blast hits to 1807 proteins in 27 /.../ies: Archae - 0%3B Bacteria - 0%3B Metazoa - 736%3B Fungi - 347%3B Plants - 385%3B Viruses - 0%3B Other Eukaryotes - 339 (source: NCBI…	LOC_Os11g32890	expressed protein
TraesCS5D02G293900	6.30774	0.00298654	0.0206076	Up	AT3G49020		FBD-associated F-box protein At3g49020	LOC_Os09g32580	expressed protein
TraesCS6A02G291300	6.30687	1.11833e-05	0.000200638	Up
TraesCS5B02G426700	6.30425	2.59837e-07	7.67172e-06	Up				LOC_Os11g26760	dehydrin
TraesCS3D02G024700	6.30279	1.96895e-16	3.72356e-14	Up	AT2G46950	CYP709B2	cytochrome P450%2C family 709%2C subfamily B%2C polypeptide 2	LOC_Os03g25480	cytochrome P450
TraesCSU02G129500	6.30015	1.09134e-06	2.69762e-05	Up	AT4G17615	CBL1	Calcineurin B-like protein 1	LOC_Os10g41510	calcineurin B
TraesCS3A02G401500	6.28655	1.15358e-12	1.10737e-10	Up	AT3G59850		Pectin lyase-like superfamily protein	LOC_Os01g66710	polygalacturonase
TraesCS1A02G362800	6.28535	7.36067e-05	0.000998403	Up	AT3G21330	BHLH87	Transcription factor bHLH87	LOC_Os05g46370	bHelix-loop-helix transcription factor
TraesCS3A02G468700	6.27642	0.000147435	0.00177428	Up	AT1G76830		Putative F-box protein At1g76830	LOC_Os04g11660	OsFBX119 - F-box domain containing protein
TraesCS5D02G330700	6.27203	1.78626e-09	9.1137e-08	Up	AT1G21230	WAK5	Wall-associated receptor kinase 5	ChrUn.fgenesh.mRNA	expressed protein
TraesCS7A02G333100	6.27004	2.93642e-08	1.1133e-06	Up	AT3G22490		Seed maturation protein	LOC_Os06g23350	late embryogenesis abundant protein D-34
TraesCS3A02G061700	6.26162	1.09285e-05	0.000197	Up	AT1G11610	CYP71A18	Cytochrome P450 71A18	LOC_Os11g27730	cytochrome P450
TraesCS7D02G088600	6.25239	2.09806e-07	6.39173e-06	Up	AT5G25940		early nodulin-related	LOC_Os06g05000	early nodulin 93 ENOD93 protein
TraesCS4A02G298900	6.24487	0.00761517	0.0423364	Up	AT5G55630	TPK1	Two-pore potassium channel 1	LOC_Os07g01810	potassium channel protein
TraesCS3D02G514300	6.24305	8.31423e-09	3.60687e-07	Up	AT4G24220	VEP1	3-oxo-Delta(4%2C5)-steroid 5-beta-reductase	LOC_Os03g32170	NAD dependent epimerase/dehydratase family protein
TraesCS4A02G098600	6.23241	5.10579e-37	8.9584e-34	Up	AT5G42020	MED37F	Mediator of RNA polymerase II transcription subunit 37f	LOC_Os08g09770	DnaK family protein
TraesCS6B02G185000	6.22272	0.00189414	0.014293	Up
TraesCS5A02G176900	6.21994	1.10804e-06	2.73392e-05	Up	AT3G11900	ANT1	Amino acid transporter ANT1	LOC_Os07g12770	transmembrane amino acid transporter protein
TraesCS1D02G375000	6.20979	3.36393e-07	9.64938e-06	Up	AT2G34420	LHB1B2	photosystem II light harvesting complex gene B1B2	LOC_Os01g52240	chlorophyll A-B binding protein
TraesCS5B02G006500	6.20415	7.00853e-06	0.000134637	Up	AT3G45140	LOX2	Lipoxygenase 2%2C chloroplastic	LOC_Os08g39850	lipoxygenase
TraesCS2A02G482000	6.19866	0.0028963	0.0201168	Up	AT5G02060		CASP-like protein 5B1	LOC_Os09g07480	membrane associated DUF588 domain containing protein
TraesCS7B02G400500	6.19647	1.63508e-06	3.81383e-05	Up	AT5G52450		MATE efflux family protein	LOC_Os10g20450	MATE efflux family protein
TraesCS4D02G095900	6.19565	0.000165216	0.00194987	Up	AT1G69640	SBH1	Sphinganine C(4)-monooxygenase 1	LOC_Os06g22490	sphingolipid C4-hydroxylase SUR2
TraesCS2D02G280800	6.18913	2.85924e-06	6.18921e-05	Up	AT3G28960		Transmembrane amino acid transporter family protein	LOC_Os06g12320	transmembrane amino acid transporter protein
TraesCS5D02G360600	6.18697	4.5868e-12	3.9081e-10	Up	AT1G07750		RmlC-like cupins superfamily protein	LOC_Os09g37976	cupin domain containing protein
TraesCS1D02G334300	6.18372	0.00379664	0.0248492	Up	AT4G03220		Putative F-box/FBD/LRR-repeat protein At4g03220	LOC_Os12g41300	OsFBX462 - F-box domain containing protein
TraesCS5A02G205600	6.1831	4.04492e-05	0.000604384	Up	AT4G37980	CAD7	Cinnamyl alcohol dehydrogenase 7	LOC_Os09g23550	dehydrogenase
TraesCS3D02G035200	6.17872	1.40878e-05	0.000244507	Up	AT2G34930		disease resistance family protein / LRR family protein	LOC_Os11g35410	expressed protein
TraesCS6A02G359900	6.17648	3.54662e-06	7.45238e-05	Up	AT1G23070		Protein LAZ1 homolog 2	LOC_Os03g29340	domain of unknown function domain containing protein
TraesCS2D02G581500	6.1757	2.66949e-21	9.80323e-19	Up	AT5G48930	HST	Shikimate O-hydroxycinnamoyltransferase	LOC_Os03g08720	transferase family protein
TraesCS7D02G217400	6.17484	2.94099e-15	4.55305e-13	Up	AT4G18910	NIP1-2	Aquaporin NIP1-2	LOC_Os02g13870	aquaporin protein
TraesCS1B02G192000	6.17362	9.14793e-05	0.00119648	Up	AT4G17970	ALMT12	Aluminum-activated malate transporter 12	LOC_Os10g42180	aluminum-activated malate transporter
TraesCS5A02G258900	6.17272	0.000615032	0.00579185	Up	AT2G33690		Late embryogenesis abundant protein%2C group 6	LOC_Os09g30418	heat shock protein
TraesCS4A02G117400	6.16192	0.000302388	0.00323392	Up	AT1G66810		Zinc finger CCCH domain-containing protein 14	LOC_Os03g18950	zinc finger C-x8-C-x5-C-x3-H type family protein
TraesCS1A02G429300	6.15115	2.109e-09	1.05557e-07	Up	AT3G50930	BCS1	cytochrome BC1 synthesis	LOC_Os01g42030	mitochondrial chaperone BCS1
TraesCS3B02G529400	6.14777	2.78978e-13	3.06636e-11	Up	AT4G16260		Glycosyl hydrolase superfamily protein	LOC_Os01g71670	glycosyl hydrolases family 17
TraesCS1B02G444000	6.14725	1.47626e-08	6.05496e-07	Up	AT2G25625		unknown protein%3B FUNCTIONS IN: molecular_function unknown%3B INVOLVED IN: biological_process unknown%3B LOCATED IN: chloroplast%3B EXPRESSED IN: 10 plant structures%3B EXPRESSED DURING: LP.06 six leaves visible%2C LP.04 four leaves visible%2C 4 anthesis%2C petal /.../entiation and expansion stage%3B Has 24 Blast hits to 24 proteins in 9 species: Archae - 0%3B Bacteria - 0%3B Metazoa - 0%3B Fung…	LOC_Os05g49940	expressed protein
TraesCS5A02G385600	6.14591	3.4607e-05	0.000530512	Up	AT3G22490		Seed maturation protein	LOC_Os03g53610	late embryogenesis abundant protein D-34
TraesCS5A02G518500	6.14497	1.88519e-06	4.31749e-05	Up				LOC_Os07g02560	NB-ARC domain containing protein
TraesCS4A02G423400	6.14207	9.67121e-05	0.00125522	Up				LOC_Os07g36920	OsFBX255 - F-box domain containing protein
TraesCS5A02G238000	6.14078	1.12214e-05	0.000201171	Up	AT3G19270	CYP707A4	Abscisic acid 8'-hydroxylase 4	LOC_Os09g28390	cytochrome P450
TraesCS3A02G039500	6.13831	0.000574548	0.00547868	Up	AT3G45860	CRK4	Cysteine-rich receptor-like protein kinase 4	LOC_Os10g04720	TKL_IRAK_DUF26-la.5 - DUF26 kinases have homology to DUF26 containing loci
TraesCS1A02G341200	6.13353	8.59525e-07	2.19683e-05	Up				LOC_Os05g44420	expressed protein
TraesCS7A02G197300	6.13297	9.79599e-05	0.00126881	Up
TraesCS2B02G561100	6.13188	9.72437e-06	0.000178072	Up	AT4G10270		Wound-responsive family protein	LOC_Os04g54300	wound induced protein
TraesCSU02G241700	6.13117	7.65955e-09	3.35667e-07	Up	AT1G34300		G-type lectin S-receptor-like serine/threonine-protein kinase At1g34300	LOC_Os06g13320	protein kinase
TraesCS2A02G432400	6.12972	0.000731494	0.00665381	Up	AT4G29905		unknown protein%3B BEST Arabidopsis thaliana protein match is: unknown protein (TAIR:AT5G57123.1)%3B Has 73 Blast hits to 73 proteins in 13 species: Archae - 0%3B Bacteria - 0%3B Metazoa - 0%3B Fungi - 0%3B Plants - 73%3B Viruses - 0%3B Other Eukaryotes - 0 (source /.../ BLink).	LOC_Os04g51680	expressed protein
TraesCS3D02G518100	6.12647	7.44356e-07	1.94016e-05	Up
TraesCS7D02G366500	6.12562	2.47658e-27	1.76426e-24	Up	AT1G59870	ABCG36	ABC transporter G family member 36	LOC_Os06g36090	ABC-2 type transporter
TraesCS7A02G400300	6.12039	0.000155352	0.00185658	Up				LOC_Os07g10880	expressed protein
TraesCS4B02G053200	6.11647	0.000528307	0.00512438	Up				LOC_Os11g09940	expressed protein
TraesCS3D02G127500	6.11532	0.000642961	0.00599578	Up	AT3G04710	TPR10	ankyrin repeat family protein	LOC_Os01g09384	ankyrin repeat domain containing protein
TraesCS2B02G147900	6.10202	0.00820147	0.0448414	Up	AT3G12860		NOP56-like pre RNA processing ribonucleoprotein	LOC_Os03g22880	nucleolar protein 5A
TraesCS6B02G383200	6.10131	1.08446e-05	0.000195711	Up
TraesCS5A02G454200	6.09262	0.000269733	0.00294697	Up	AT2G34420	LHB1B2	photosystem II light harvesting complex gene B1B2	LOC_Os01g52240	chlorophyll A-B binding protein
TraesCS4D02G277500	6.08725	0.00017079	0.00200665	Up	AT3G56640	SEC15A	Exocyst complex component SEC15A	LOC_Os03g06760	exocyst complex component 6
TraesCS3A02G231800	6.08466	0.00234395	0.016963	Up
TraesCS6D02G271500	6.08358	0.000515681	0.00502197	Up	AT3G47570		Probable LRR receptor-like serine/threonine-protein kinase At3g47570	LOC_Os11g47030	receptor protein kinase
TraesCS7B02G244000	6.0834	1.79628e-16	3.41571e-14	Up	AT2G02120	PDF2.1	Defensin-like protein 4	LOC_Os02g41904	DEF7 - Defensin and Defensin-like DEFL family
TraesCS7A02G188400	6.07776	0.000263861	0.00289315	Up	AT1G18790	RKD1	Protein RKD1	LOC_Os06g12360	pentatricopeptide
TraesCS1D02G387500	6.07297	2.06972e-05	0.000339799	Up	AT4G12730	FLA2	Fasciclin-like arabinogalactan protein 2	LOC_Os09g07350	fasciclin-like arabinogalactan protein 8 precursor
TraesCS7B02G015300	6.07201	0.0015819	0.0123795	Up	AT4G10540		Subtilase family protein	LOC_Os04g03810	OsSub38 - Putative Subtilisin homologue
TraesCS7B02G300400	6.06955	0.00114169	0.00954051	Up	AT5G60900	RLK1	receptor-like protein kinase 1	LOC_Os06g41510	D-mannose binding lectin family protein
TraesCS5B02G517800	6.06336	7.73489e-07	2.00836e-05	Up	AT3G12580	MED37C	Probable mediator of RNA polymerase II transcription subunit 37c	LOC_Os05g38530	DnaK family protein
TraesCS5D02G244900	6.06129	3.37838e-07	9.68204e-06	Up	AT3G19270	CYP707A4	Abscisic acid 8'-hydroxylase 4	LOC_Os09g28390	cytochrome P450
TraesCS3A02G529500	6.05919	8.59308e-05	0.00113408	Up	AT3G16520	UGT88A1	UDP-glycosyltransferase 88A1	LOC_Os01g53350	anthocyanidin 5
TraesCS3B02G508900	6.05064	8.19207e-05	0.0010892	Up	AT5G49610		F-box protein At5g49610	LOC_Os04g11660	OsFBX119 - F-box domain containing protein
TraesCS2D02G429700	6.04683	0.00469765	0.0292992	Up	AT3G26300	CYP71B34	Cytochrome P450 71B34	LOC_Os04g10160	cytochrome P450
TraesCS5D02G479300	6.04544	0.00696924	0.0395168	Up				LOC_Os01g04040	BBTI11 - Bowman-Birk type bran trypsin inhibitor precursor
TraesCS5D02G266700	6.04506	1.78764e-05	0.000300092	Up	AT2G33690		Late embryogenesis abundant protein%2C group 6	LOC_Os09g30418	heat shock protein
TraesCS7A02G067100	6.044	1.52873e-06	3.612e-05	Up	AT2G18050	HIS1-3	histone H1-3	LOC_Os06g04020	histone H1
TraesCS7A02G552700	6.0372	1.27541e-05	0.000224318	Up	AT4G02780	GA1	Ent-copalyl diphosphate synthase%2C chloroplastic	LOC_Os02g17780	ent-kaurene synthase
TraesCS1D02G429300	6.03513	1.40784e-05	0.000244434	Up				LOC_Os03g47420	OsFBX107 - F-box domain containing protein
TraesCS4B02G013100	6.03355	0.000107299	0.00136823	Up	AT3G63410	VTE3	2-methyl-6-phytyl-1%2C4-hydroquinone methyltransferase%2C chloroplastic	LOC_Os12g42090	methyltransferase domain containing protein
TraesCS5D02G050800	6.02194	3.29933e-05	0.000509699	Up	AT4G16160	OEP162	Outer envelope pore protein 16-2%2C chloroplastic	LOC_Os01g19770	mitochondrial import inner membrane translocase subunit Tim17
TraesCS5D02G399500	6.01489	0.00105877	0.00897589	Up	AT3G58450		Adenine nucleotide alpha hydrolases-like superfamily protein	LOC_Os03g53900	universal stress protein domain containing protein
TraesCSU02G133200	6.0144	1.55289e-06	3.6545e-05	Up	AT4G29810	MKK2	Mitogen-activated protein kinase kinase 2	LOC_Os10g22484	RGH2B
TraesCS3B02G247200	6.00925	8.4851e-11	5.64161e-09	Up	AT1G71000		Chaperone DnaJ-domain superfamily protein	LOC_Os01g42190	heat shock protein DnaJ
TraesCS7D02G125400	6.00783	2.139e-05	0.000349959	Up	AT1G78230		Outer arm dynein light chain 1 protein	LOC_Os03g09070	leucine rich repeat domain containing protein
TraesCS2D02G065400	6.0074	0.000137431	0.00167236	Up	AT1G67090	RBCS-1A	Ribulose bisphosphate carboxylase small chain 1A%2C chloroplastic	LOC_Os12g17600	ribulose bisphosphate carboxylase small chain
TraesCS2D02G581200	6.00414	4.38677e-23	1.93316e-20	Up	AT1G65880	AAE20	Benzoate--CoA ligase%2C peroxisomal	LOC_Os03g03790	AMP-binding domain containing protein
TraesCS5B02G271000	5.99062	6.03521e-17	1.24037e-14	Up	AT2G19130		G-type lectin S-receptor-like serine/threonine-protein kinase At2g19130	LOC_Os01g66680	S-domain receptor-like protein kinase
TraesCS3D02G048300	5.98512	3.02254e-06	6.49668e-05	Up
TraesCS3A02G226700	5.9815	0.00102693	0.00875293	Up	AT3G48530	KING1	SNF1-related protein kinase regulatory subunit gamma-1	LOC_Os01g44250	CBS domain containing membrane protein
TraesCS6B02G157000	5.98041	1.81754e-08	7.25988e-07	Up	AT1G72300	PSYR1	Tyrosine-sulfated glycopeptide receptor 1	LOC_Os02g06070	phytosulfokine receptor precursor
TraesCS4A02G282400	5.97916	0.000137427	0.00167236	Up	AT1G05970		RNA-binding (RRM/RBD/RNP motifs) family protein	LOC_Os09g02400	RNA-binding region RNP-1
TraesCS2A02G467500	5.97897	0.0019324	0.0145227	Up				LOC_Os02g33380	pectinesterase inhibitor domain containing protein
TraesCS4D02G035800	5.97617	0.000292049	0.00314544	Up	AT1G03140		splicing factor Prp18 family protein	LOC_Os03g49430	pre-mRNA-splicing factor
TraesCS3D02G218800	5.97058	8.0842e-09	3.51835e-07	Up	AT1G71000		Chaperone DnaJ-domain superfamily protein	LOC_Os01g42190	heat shock protein DnaJ
TraesCS7A02G001400	5.96634	0.00214675	0.0158027	Up	AT5G20400		2-oxoglutarate (2OG) and Fe(II)-dependent oxygenase superfamily protein	LOC_Os02g17940	leucoanthocyanidin dioxygenase
TraesCS1B02G461700	5.9581	0.000116365	0.0014626	Up	AT5G24130		unknown protein%3B FUNCTIONS IN: molecular_function unknown%3B INVOLVED IN: biological_process unknown%3B LOCATED IN: mitochondrion%3B EXPRESSED IN: petal%2C leaf whorl%2C flower%3B EXPRESSED DURING: 4 anthesis%2C petal differentiation and expansion stage%3B Has 1807 /.../ hits to 1807 proteins in 277 species: Archae - 0%3B Bacteria - 0%3B Metazoa - 736%3B Fungi - 347%3B Plants - 385%3B Viruses -…	LOC_Os05g50940	expressed protein
TraesCS5A02G003500	5.95725	1.92277e-12	1.76015e-10	Up	AT5G40010	AATP1	AAA-ATPase 1	LOC_Os12g24320	ATPase 3
TraesCS2B02G380900	5.9479	1.10985e-12	1.06972e-10	Up				LOC_Os10g34602	csAtPR5
TraesCS6D02G335300	5.94463	0.00103591	0.00881679	Up	AT2G37710	LECRK41	L-type lectin-domain containing receptor kinase IV.1	LOC_Os07g38810	lectin receptor-type protein kinase
TraesCS6B02G261600	5.94211	0.00195446	0.0146582	Up
TraesCS7A02G092700	5.94109	2.08401e-06	4.7192e-05	Up	AT5G25940		early nodulin-related	LOC_Os06g04950	early nodulin 93 ENOD93 protein
TraesCS3A02G283100	5.93689	7.23318e-05	0.000984082	Up	AT1G29680		Protein of unknown function (DUF1264)	LOC_Os01g52830	DUF1264 domain containing protein
TraesCS5D02G558800	5.92911	5.18905e-06	0.000103985	Up	AT1G04560		AWPM-19-like family protein	LOC_Os07g24000	AWPM-19-like membrane family protein
TraesCS5A02G216200	5.92868	9.1367e-06	0.000168746	Up	AT1G17290	ALAAT1	Alanine aminotransferase 1%2C mitochondrial	LOC_Os09g26380	aminotransferase
TraesCS2D02G564900	5.92554	2.39118e-06	5.302e-05	Up	AT3G13790	CWINV1	Beta-fructofuranosidase%2C insoluble isoenzyme CWINV1	LOC_Os09g08072	glycosyl hydrolases
TraesCS1D02G028000	5.92523	0.000107524	0.00137057	Up	AT2G38870		Serine protease inhibitor%2C potato inhibitor I-type family protein	LOC_Os12g25090	expressed protein
TraesCS5B02G046600	5.91444	0.00230585	0.01675	Up	AT5G27690		Heavy metal transport/detoxification superfamily protein	LOC_Os01g20830	heavy metal-associated domain containing protein
TraesCS5B02G434100	5.91442	4.57761e-06	9.33311e-05	Up	AT3G22640	PAP85	cupin family protein	LOC_Os03g57960	cupin domain containing protein
TraesCS1B02G388200	5.91223	6.79149e-06	0.000131052	Up	AT2G34420	LHB1B2	photosystem II light harvesting complex gene B1B2	LOC_Os01g52240	chlorophyll A-B binding protein
TraesCS3B02G446600	5.90992	0.00594146	0.0350407	Up	AT5G06730	PER54	Peroxidase 54	LOC_Os03g13180	peroxidase precursor
TraesCS4D02G016000	5.90883	9.32444e-06	0.000171678	Up	AT3G22640	PAP85	cupin family protein	LOC_Os03g46100	cupin domain containing protein
TraesCS3D02G378200	5.90039	0.0017121	0.0131685	Up	AT5G04940	SUVH1	Histone-lysine N-methyltransferase%2C H3 lysine-9 specific SUVH1	LOC_Os11g38900	histone-lysine N-methyltransferase
TraesCS7B02G176400	5.89847	1.8511e-05	0.000309484	Up	AT5G22500	FAR1	Fatty acyl-CoA reductase 1	LOC_Os08g44360	male sterility protein 2
TraesCS1A02G029900	5.89726	5.51377e-16	9.48109e-14	Up	AT3G21690		MATE efflux family protein	LOC_Os03g37490	MATE efflux family protein
TraesCS4B02G356100	5.89472	6.21069e-08	2.18263e-06	Up	AT1G76690	OPR2	12-oxophytodienoate reductase 2	LOC_Os06g11290	12-oxophytodienoate reductase
TraesCS5B02G443100	5.8928	2.87414e-21	1.0514e-18	Up	AT3G19690		CAP (Cysteine-rich secretory proteins%2C Antigen 5%2C and Pathogenesis-related 1 protein) superfamily protein	LOC_Os07g03710	SCP-like extracellular protein
TraesCS6A02G350200	5.89247	1.45769e-29	1.34088e-26	Up
TraesCS3A02G133400	5.89219	4.3474e-06	8.92716e-05	Up	AT1G30040	GA2OX2	Gibberellin 2-beta-dioxygenase 2	LOC_Os01g11150	gibberellin 2-beta-dioxygenase
TraesCS6D02G063100	5.88984	1.57918e-05	0.000269831	Up	AT5G07990	CYP75B1	Flavonoid 3'-monooxygenase	LOC_Os09g26940	cytochrome P450
TraesCS2A02G542300	5.88032	0.00041275	0.00417759	Up	AT2G32300	UCC1	uclacyanin 1	LOC_Os08g04340	plastocyanin-like domain containing protein
TraesCS2B02G112300	5.87437	0.000129956	0.00159803	Up				LOC_Os03g19940	expressed protein
TraesCS4D02G101200	5.87155	0.00268608	0.0189258	Up	AT4G33467		unknown protein%3B Has 25 Blast hits to 25 proteins in 9 species: Archae - 0%3B Bacteria - 0%3B Metazoa - 0%3B Fungi - 0%3B Plants - 25%3B Viruses - 0%3B Other Eukaryotes - 0 (source: NCBI BLink).	LOC_Os12g08700	expressed protein
TraesCS3B02G173400	5.86593	2.10755e-08	8.25816e-07	Up	AT5G41761		unknown protein%3B FUNCTIONS IN: molecular_function unknown%3B INVOLVED IN: biological_process unknown%3B LOCATED IN: cellular_component unknown%3B BEST Arabidopsis thaliana protein match is: unknown protein (TAIR:AT3G55570.1)%3B Has 30201 Blast hits to 17322 /.../ins in 780 species: Archae - 12%3B Bacteria - 1396%3B Metazoa - 17338%3B Fungi - 3422%3B Plants - 5037%3B Viruses - 0%3B Other Eukaryo…	LOC_Os01g12190	expressed protein
TraesCS4B02G017600	5.86453	8.18838e-05	0.00108917	Up	AT3G22640	PAP85	cupin family protein	LOC_Os03g46100	cupin domain containing protein
TraesCS4A02G313300	5.86068	0.000651307	0.00606236	Up	AT1G04560		AWPM-19-like family protein	LOC_Os07g24000	AWPM-19-like membrane family protein
TraesCS6D02G100500	5.85572	0.000125102	0.00155123	Up	AT1G16770		unknown protein%3B Has 109 Blast hits to 109 proteins in 52 species: Archae - 0%3B Bacteria - 4%3B Metazoa - 0%3B Fungi - 71%3B Plants - 32%3B Viruses - 0%3B Other Eukaryotes - 2 (source: NCBI BLink).	LOC_Os02g04780	expressed protein
TraesCS7B02G015200	5.84549	1.90215e-14	2.59685e-12	Up	AT4G10520		Subtilase family protein	LOC_Os02g17080	OsSub16 - Putative Subtilisin homologue
TraesCS7D02G062300	5.84104	0.000265197	0.00290545	Up	AT2G46770	NAC043	NAC domain-containing protein 43	LOC_Os06g04090	no apical meristem protein
TraesCS7B02G378100	5.83682	0.00081886	0.0072965	Up	AT4G16730	TPS02	terpene synthase 02	LOC_Os04g27340	terpene synthase
TraesCS1D02G374900	5.83646	0.000600198	0.00567698	Up	AT2G34420	LHB1B2	photosystem II light harvesting complex gene B1B2	LOC_Os01g52240	chlorophyll A-B binding protein
TraesCS2A02G067000	5.82079	1.6266e-06	3.79778e-05	Up	AT1G67090	RBCS-1A	Ribulose bisphosphate carboxylase small chain 1A%2C chloroplastic	LOC_Os12g17600	ribulose bisphosphate carboxylase small chain
TraesCS5A02G066200	5.81989	0.000193282	0.00223244	Up	AT4G08850		Probable LRR receptor-like serine/threonine-protein kinase At4g08850	LOC_Os02g34790	receptor-like protein kinase 5 precursor
TraesCS2B02G322100	5.81763	1.90147e-05	0.000316342	Up	AT1G72100		late embryogenesis abundant domain-containing protein / LEA domain-containing protein	LOC_Os04g35490	expressed protein
TraesCS5A02G057300	5.81734	0.000728643	0.00663425	Up
TraesCS3B02G598200	5.81403	1.12654e-05	0.000201916	Up	AT3G16520	UGT88A1	UDP-glycosyltransferase 88A1	LOC_Os01g53350	anthocyanidin 5
TraesCS7D02G137200	5.81336	0.00185796	0.0140647	Up	AT4G25650	PTC52	Protochlorophyllide-dependent translocon component 52%2C chloroplastic	LOC_Os03g59110	pheophorbide a oxygenase
TraesCS2A02G402700	5.81146	0.00214178	0.0157691	Up	AT2G02060		Homeodomain-like superfamily protein	LOC_Os04g47890	MYB family transcription factor
TraesCS4D02G199800	5.80951	3.32048e-05	0.000512299	Up	AT5G18610		Protein kinase superfamily protein	LOC_Os03g17550	serine/threonine-protein kinase
TraesCS5D02G354600	5.80306	3.76326e-39	7.2766e-36	Up	AT1G19250	FMO1	Probable flavin-containing monooxygenase 1	LOC_Os04g14710	flavin-containing monooxygenase family protein
TraesCS7D02G306300	5.80293	0.000147014	0.00177038	Up	AT5G03555	NCS1	Purine-uracil permease NCS1	LOC_Os02g44680	allantoin permease
TraesCS7B02G159400	5.79857	4.65851e-06	9.47767e-05	Up	AT1G27950	LTPG1	Non-specific lipid transfer protein GPI-anchored 1	LOC_Os08g42040	LTPL80 - Protease inhibitor/seed storage/LTP family protein precursor
TraesCS3D02G406900	5.79619	6.01353e-10	3.36339e-08	Up	AT5G06730	PER54	Peroxidase 54	LOC_Os03g13180	peroxidase precursor
TraesCS5D02G359100	5.7924	1.57389e-06	3.69658e-05	Up	AT2G34930		disease resistance family protein / LRR family protein	LOC_Os02g17400	leucine rich repeat protein
TraesCS1A02G290900	5.78781	2.67758e-06	5.84135e-05	Up	AT5G41380		CCT motif family protein	LOC_Os05g38990	CCT motif family protein
TraesCS1A02G416700	5.78406	8.18297e-07	2.1068e-05	Up	AT3G10020		unknown protein%3B FUNCTIONS IN: molecular_function unknown%3B INVOLVED IN: response to oxidative stress%2C anaerobic respiration%3B LOCATED IN: cellular_component unknown%3B EXPRESSED IN: 23 plant structures%3B EXPRESSED DURING: 13 growth stages%3B Has 47 Blast /.../o 47 proteins in 12 species: Archae - 0%3B Bacteria - 0%3B Metazoa - 1%3B Fungi - 0%3B Plants - 46%3B Viruses - 0%3B Other Eukaryot…	LOC_Os11g05170	expressed protein
TraesCS2A02G410100	5.77931	1.46592e-07	4.63275e-06	Up	AT2G15490	UGT73B4	UDP-glycosyltransferase 73B4	LOC_Os04g47720	cis-zeatin O-glucosyltransferase
TraesCS7A02G324800	5.77808	3.13201e-07	9.06647e-06	Up	AT1G77610	UDP-GALT1	UDP-galactose transporter 1	LOC_Os04g59550	phosphate/phosphate translocator
TraesCS4D02G016100	5.77339	0.000119856	0.00149952	Up	AT3G22640	PAP85	cupin family protein	LOC_Os03g46100	cupin domain containing protein
TraesCS1A02G411200	5.76429	1.12713e-14	1.58209e-12	Up	AT4G26080	ABI1	Protein phosphatase 2C 56	LOC_Os05g49730	protein phosphatase 2C
TraesCS5B02G208500	5.75619	1.88685e-08	7.50509e-07	Up	AT2G05940		Protein kinase superfamily protein	LOC_Os09g27010	tyrosine protein kinase domain containing protein
TraesCS1D02G424500	5.74671	3.60736e-05	0.000548169	Up	AT3G10020		unknown protein%3B FUNCTIONS IN: molecular_function unknown%3B INVOLVED IN: response to oxidative stress%2C anaerobic respiration%3B LOCATED IN: cellular_component unknown%3B EXPRESSED IN: 23 plant structures%3B EXPRESSED DURING: 13 growth stages%3B Has 47 Blast /.../o 47 proteins in 12 species: Archae - 0%3B Bacteria - 0%3B Metazoa - 1%3B Fungi - 0%3B Plants - 46%3B Viruses - 0%3B Other Eukaryot…	LOC_Os12g05210	expressed protein
TraesCS6A02G044200	5.74561	6.24092e-06	0.000121943	Up	AT4G13920	AtRLP50	receptor like protein 50	LOC_Os01g41770	leucine rich repeat protein
TraesCS6D02G071500	5.74455	1.59525e-07	4.99318e-06	Up				LOC_Os02g15160	OsFBX40 - F-box domain containing protein
TraesCS6A02G356200	5.74445	9.28263e-05	0.00121276	Up	AT5G60790	ABCF1	ABC transporter F family member 1	LOC_Os09g39910	ABC transporter
TraesCS1A02G003700	5.74399	0.00442855	0.028023	Up				LOC_Os02g33070	expressed protein
TraesCS3A02G401900	5.74179	3.16673e-07	9.15298e-06	Up	AT5G06060		Tropinone reductase homolog At5g06060	LOC_Os11g43200	tropinone reductase 2
TraesCS6B02G400600	5.72985	3.85975e-05	0.000580057	Up				LOC_Os02g55610	serine-rich protein
TraesCS3B02G452600	5.72439	8.85062e-10	4.78904e-08	Up	AT4G05460	SKIP19	F-box protein SKIP19	LOC_Os08g09390	OsFBX264 - F-box domain containing protein
TraesCS3A02G125200	5.72357	7.63835e-05	0.00102974	Up	AT2G36780	UGT73C3	UDP-glycosyltransferase 73C3	LOC_Os01g08110	flavonol-3-O-glycoside-7-O-glucosyltransferase 1
TraesCS1D02G305700	5.71896	0.00040072	0.00407717	Up	AT3G43720	LTPG2	Non-specific lipid transfer protein GPI-anchored 2	LOC_Os05g41030	LTPL67 - Protease inhibitor/seed storage/LTP family protein precursor
TraesCS6B02G440100	5.71729	9.85087e-10	5.27902e-08	Up	AT3G14470	RPPL1	Putative disease resistance RPP13-like protein 1	LOC_Os10g04570	expressed protein
TraesCS7D02G198800	5.70423	8.25452e-08	2.81223e-06	Up
TraesCS6D02G245100	5.69578	0.00169346	0.0130488	Up	AT5G38570		Putative FBD-associated F-box protein At5g38570	LOC_Os04g35940	OsFBX135 - F-box domain containing protein
TraesCS3B02G495700	5.69512	0.00373734	0.024539	Up	AT2G23620	MES1	Methylesterase 1	LOC_Os01g70850	esterase
TraesCS3D02G127700	5.6951	0.00645915	0.037334	Up	AT3G04710	TPR10	ankyrin repeat family protein	LOC_Os01g09384	ankyrin repeat domain containing protein
TraesCS6B02G139800	5.69345	0.000134224	0.00164072	Up	AT1G16770		unknown protein%3B Has 109 Blast hits to 109 proteins in 52 species: Archae - 0%3B Bacteria - 4%3B Metazoa - 0%3B Fungi - 71%3B Plants - 32%3B Viruses - 0%3B Other Eukaryotes - 2 (source: NCBI BLink).	LOC_Os02g04780	expressed protein
[truncated: 11,596 more rows]
