# Supplementary material for: Integrated transcriptome profiling identifies novel regulatory hubs mediating salt stress responses during germination and early seedling development in wheat
Source: Research Square preprint supplement (doi:10.21203/rs.3.rs-8546897/v1), 2026-01-22
Supplement: Supplementary file 7 [file dd3d58159ab5e1f21624efda.xlsx]

## Sheet: Sheet1
The information of particular genes in corresponding WGCNA modules.
Catergory of DEG: "No" refers to genes without differential expression, "Shared" indicates DEGs common to both germination and seedling stages, "Germination" denotes germination-stage-specific DEGs, and "Seedling" represents seedling-stage-specific DEGs. The DEGs were identfied based on our own sequenced data.
Gene ID	Module Name	Catergory of DEG	Annotation
			The homologous genes and corresponding descriptions in Arabidopsis thaliana			The homologous genes and corresponding descriptions in Oryza sativa
TraesCS7B02G311600	black	Shared	AT2G06050	OPR3	12-oxophytodienoate reductase 3	LOC_Os08g35740	12-oxophytodienoate reductase
TraesCS3A02G035500	black	No DEG	AT1G07400	HSP17.8	17.8 kDa class I heat shock protein	LOC_Os01g04350	hsp20/alpha crystallin family protein
TraesCS2B02G039900	black	No DEG	AT1G06620		1-aminocyclopropane-1-carboxylate oxidase homolog 1	LOC_Os04g10350	1-aminocyclopropane-1-carboxylate oxidase homolog 2
TraesCS1D02G087300	black	Shared	AT1G06650		1-aminocyclopropane-1-carboxylate oxidase homolog 3	LOC_Os03g48430	1-aminocyclopropane-1-carboxylate oxidase homolog 4
TraesCS7D02G350300	black	Seedling	AT5G19990	RPT6A	26S protease regulatory subunit 8 homolog A	LOC_Os02g11050	26S protease regulatory subunit
TraesCS3A02G183700	black	Seedling	AT5G23540	RPN11	26S proteasome non-ATPase regulatory subunit 14 homolog	LOC_Os05g30800	26S proteasome non-ATPase regulatory subunit 14
TraesCS1D02G235300	black	Seedling	AT5G23540	RPN11	26S proteasome non-ATPase regulatory subunit 14 homolog	LOC_Os05g30800	26S proteasome non-ATPase regulatory subunit 14
TraesCS6B02G144500	black	Seedling	AT2G20580	RPN1A	26S proteasome non-ATPase regulatory subunit 2 homolog A	LOC_Os02g05340	proteasome/cyclosome repeat containing protein
TraesCS6D02G105500	black	Seedling	AT2G20580	RPN1A	26S proteasome non-ATPase regulatory subunit 2 homolog A	LOC_Os02g05340	proteasome/cyclosome repeat containing protein
TraesCS6A02G116500	black	Seedling	AT2G20580	RPN1A	26S proteasome non-ATPase regulatory subunit 2 homolog A	LOC_Os02g05340	proteasome/cyclosome repeat containing protein
TraesCS6B02G242700	black	Seedling	AT4G24820	RPN7	26S proteasome non-ATPase regulatory subunit 6 homolog	LOC_Os02g38810	26S proteasome non-ATPase regulatory subunit 6
TraesCS6A02G212300	black	Seedling	AT4G24820	RPN7	26S proteasome non-ATPase regulatory subunit 6 homolog	LOC_Os02g38810	26S proteasome non-ATPase regulatory subunit 6
TraesCS2B02G524100	black	Seedling	AT5G05780	RPN8A	26S proteasome non-ATPase regulatory subunit 7 homolog A	LOC_Os04g56646	MEE34
TraesCS4D02G341800	black	Shared	AT5G24530	DMR6	2-oxoglutarate (2OG) and Fe(II)-dependent oxygenase superfamily protein	LOC_Os03g03034	flavonol synthase/flavanone 3-hydroxylase
TraesCS6B02G309800	black	Shared	AT5G48020		2-oxoglutarate (2OG) and Fe(II)-dependent oxygenase superfamily protein	LOC_Os02g48630	expressed protein
TraesCS5A02G515600	black	No DEG	AT5G24530	DMR6	2-oxoglutarate (2OG) and Fe(II)-dependent oxygenase superfamily protein	LOC_Os03g03034	flavonol synthase/flavanone 3-hydroxylase
TraesCS1D02G392300	black	Seedling	AT4G13400		2-oxoglutarate (2OG) and Fe(II)-dependent oxygenase superfamily protein	LOC_Os05g48230	expressed protein
TraesCS6A02G320700	black	Shared	AT5G20400		2-oxoglutarate (2OG) and Fe(II)-dependent oxygenase superfamily protein	LOC_Os06g07932	flavonol synthase/flavanone 3-hydroxylase
TraesCS4D02G195700	black	Shared	AT3G11180		2-oxoglutarate (2OG) and Fe(II)-dependent oxygenase superfamily protein	LOC_Os03g18030	leucoanthocyanidin dioxygenase
TraesCS6D02G261300	black	Seedling	AT5G48020		2-oxoglutarate (2OG) and Fe(II)-dependent oxygenase superfamily protein	LOC_Os02g48630	expressed protein
TraesCS3A02G345000	black	Shared	AT2G38500		2-oxoglutarate (2OG) and Fe(II)-dependent oxygenase superfamily protein	LOC_Os01g60800	expressed protein
TraesCS7D02G142000	black	Shared	AT5G20400		2-oxoglutarate (2OG) and Fe(II)-dependent oxygenase superfamily protein	LOC_Os06g07932	flavonol synthase/flavanone 3-hydroxylase
TraesCS3B02G377100	black	Germination	AT2G38500		2-oxoglutarate (2OG) and Fe(II)-dependent oxygenase superfamily protein	LOC_Os01g60800	expressed protein
TraesCS7B02G042400	black	Seedling	AT5G20550		2-oxoglutarate (2OG) and Fe(II)-dependent oxygenase superfamily protein	LOC_Os06g08060	leucoanthocyanidin dioxygenase
TraesCS6A02G281000	black	Seedling	AT5G48020		2-oxoglutarate (2OG) and Fe(II)-dependent oxygenase superfamily protein	LOC_Os02g48630	expressed protein
TraesCS4B02G195000	black	Seedling	AT3G11180		2-oxoglutarate (2OG) and Fe(II)-dependent oxygenase superfamily protein	LOC_Os03g18030	leucoanthocyanidin dioxygenase
TraesCS7D02G142300	black	Seedling	AT5G20550		2-oxoglutarate (2OG) and Fe(II)-dependent oxygenase superfamily protein	LOC_Os06g08060	leucoanthocyanidin dioxygenase
TraesCS4D02G363200	black	No DEG	AT1G17010		2-oxoglutarate (2OG) and Fe(II)-dependent oxygenase superfamily protein	LOC_Os01g24980	naringenin
TraesCS7A02G141100	black	Seedling	AT5G20400		2-oxoglutarate (2OG) and Fe(II)-dependent oxygenase superfamily protein	LOC_Os06g08060	leucoanthocyanidin dioxygenase
TraesCS7A02G310100	black	Seedling	AT1G30520	AAE14	2-succinylbenzoate--CoA ligase%2C chloroplastic/peroxisomal	LOC_Os08g03630	acyl-activating enzyme 14
TraesCS7D02G306700	black	Shared	AT1G30520	AAE14	2-succinylbenzoate--CoA ligase%2C chloroplastic/peroxisomal	LOC_Os08g03630	acyl-activating enzyme 14
TraesCSU02G184800	black	Seedling	ATCG00770	RPS8	30S ribosomal protein S8%2C chloroplastic	LOC_Os04g16832	chloroplast 30S ribosomal protein S8
TraesCS3D02G321200	black	Seedling	AT3G15290		3-hydroxyacyl-CoA dehydrogenase family protein	LOC_Os01g58380	3-hydroxybutyryl-CoA dehydrogenase
TraesCS6B02G432600	black	Seedling	AT2G33150	PED1	3-ketoacyl-CoA thiolase 2%2C peroxisomal	LOC_Os02g57260	3-ketoacyl-CoA thiolase
TraesCS6A02G392400	black	Seedling	AT2G33150	PED1	3-ketoacyl-CoA thiolase 2%2C peroxisomal	LOC_Os02g57260	3-ketoacyl-CoA thiolase
TraesCS3B02G575500	black	Seedling	AT4G24220	VEP1	3-oxo-Delta(4%2C5)-steroid 5-beta-reductase	LOC_Os03g32170	NAD dependent epimerase/dehydratase family protein
TraesCS7D02G066600	black	Seedling	AT2G45300		3-phosphoshikimate 1-carboxyvinyltransferase%2C chloroplastic	LOC_Os06g04280	3-phosphoshikimate 1-carboxyvinyltransferase
TraesCS7A02G071200	black	Seedling	AT2G45300		3-phosphoshikimate 1-carboxyvinyltransferase%2C chloroplastic	LOC_Os06g04280	3-phosphoshikimate 1-carboxyvinyltransferase
TraesCS6A02G266700	black	Shared	AT1G65060	4CL3	4-coumarate--CoA ligase 3	LOC_Os02g46970	AMP-binding domain containing protein
TraesCS4B02G075900	black	Shared	AT5G63380	4CLL9	4-coumarate--CoA ligase-like 9	LOC_Os01g67540	AMP-binding domain containing protein
TraesCS3B02G187200	black	Seedling	ATCG00660	RPL20	50S ribosomal protein L20%2C chloroplastic	LOC_Os08g15306	chloroplast 50S ribosomal protein L20
TraesCS7D02G029100	black	No DEG	AT4G38800	MTN1	5'-methylthioadenosine/S-adenosylhomocysteine nucleosidase 1	LOC_Os06g02220	MTA/SAH nucleosidase
TraesCS1D02G114100	black	Seedling	AT1G26910	RPL10B	60S ribosomal protein L10-2	LOC_Os05g07700	ribosomal protein
TraesCS5B02G029300	black	Shared	AT3G14440	NCED3	9-cis-epoxycarotenoid dioxygenase NCED3%2C chloroplastic	LOC_Os12g42280	9-cis-epoxycarotenoid dioxygenase 1
TraesCS5D02G038800	black	Seedling	AT3G14440	NCED3	9-cis-epoxycarotenoid dioxygenase NCED3%2C chloroplastic	LOC_Os12g42280	9-cis-epoxycarotenoid dioxygenase 1
TraesCS6A02G266900	black	No DEG	AT5G16930		AAA-type ATPase family protein	LOC_Os02g46990	AAA-type ATPase family protein
TraesCS5B02G188600	black	Seedling	AT3G47780	ABCA7	ABC transporter A family member 7	LOC_Os08g30770	ABC transporter
TraesCS3D02G257500	black	Seedling	AT2G47000	ABCB4	ABC transporter B family member 4	LOC_Os01g50160	MDR-like ABC transporter
TraesCS3B02G290300	black	Shared	AT2G47000	ABCB4	ABC transporter B family member 4	LOC_Os01g50160	MDR-like ABC transporter
TraesCS7D02G364700	black	Seedling	AT3G21250	ABCC8	ABC transporter C family member 8	LOC_Os06g36650	ABC transporter family protein
TraesCS7A02G358100	black	Seedling	AT3G21250	ABCC8	ABC transporter C family member 8	LOC_Os05g10730	ABC transporter
TraesCS7B02G269700	black	Seedling	AT3G21250	ABCC8	ABC transporter C family member 8	LOC_Os06g36650	ABC transporter family protein
TraesCS5B02G247700	black	Seedling	AT1G17840	ABCG11	ABC transporter G family member 11	LOC_Os09g07670	white-brown complex homolog protein 11
TraesCS5D02G257400	black	Shared	AT1G17840	ABCG11	ABC transporter G family member 11	LOC_Os09g07670	white-brown complex homolog protein 11
TraesCS5D02G257100	black	Seedling	AT1G17840	ABCG11	ABC transporter G family member 11	LOC_Os09g07670	white-brown complex homolog protein 11
TraesCS7A02G356100	black	Seedling	AT3G16340	ABCG29	ABC transporter G family member 29	LOC_Os06g36090	ABC-2 type transporter
TraesCS7D02G080300	black	Seedling	AT2G37280	ABCG33	ABC transporter G family member 33	LOC_Os12g13720	Plant PDR ABC transporter associated domain containing protein
TraesCS4A02G384800	black	Seedling	AT2G37280	ABCG33	ABC transporter G family member 33	LOC_Os12g13720	Plant PDR ABC transporter associated domain containing protein
TraesCS7A02G391100	black	Shared	AT1G15520	ABCG40	ABC transporter G family member 40	LOC_Os01g52560	Plant PDR ABC transporter associated domain containing protein
TraesCS7D02G386600	black	Shared	AT1G15520	ABCG40	ABC transporter G family member 40	LOC_Os01g42410	pleiotropic drug resistance protein
TraesCS1A02G049600	black	Shared	AT5G13580	ABCG6	ABC transporter G family member 6	LOC_Os05g02890	white-brown complex homolog protein 16
TraesCS6D02G362400	black	Seedling	AT1G03905	ABCI19	ABC transporter I family member 19	LOC_Os02g56550	ABC transporter
TraesCS3A02G484800	black	Seedling	AT1G36160	ACC1	Acetyl-CoA carboxylase 1	LOC_Os10g21910	acetyl-CoA carboxylase
TraesCS6B02G290900	black	Seedling	AT4G17830		Acetylornithine deacetylase	LOC_Os02g46520	hydrolase
TraesCS6A02G263900	black	Seedling	AT4G17830		Acetylornithine deacetylase	LOC_Os02g46520	hydrolase
TraesCS6B02G103800	black	Seedling	AT5G24090	CHIB1	Acidic endochitinase	LOC_Os06g25010	glycosyl hydrolase
TraesCS4D02G142000	black	Seedling	AT5G24090	CHIB1	Acidic endochitinase	LOC_Os06g25010	glycosyl hydrolase
TraesCS3A02G373800	black	Shared	AT5G24090	CHIB1	Acidic endochitinase	LOC_Os01g64110	glycosyl hydrolase
TraesCS4B02G143500	black	Shared	AT5G24090	CHIB1	Acidic endochitinase	LOC_Os08g40740	glycosyl hydrolase
TraesCS6A02G400000	black	Seedling	AT2G05710	ACO2	Aconitate hydratase 2%2C mitochondrial	LOC_Os08g09200	aconitate hydratase protein
TraesCS6B02G440200	black	Seedling	AT2G05710	ACO2	Aconitate hydratase 2%2C mitochondrial	LOC_Os08g09200	aconitate hydratase protein
TraesCS5A02G433900	black	Seedling	AT2G32030		Acyl-CoA N-acyltransferases (NAT) superfamily protein	LOC_Os03g58010	acetyltransferase
TraesCS2A02G112400	black	Germination	AT2G47710		Adenine nucleotide alpha hydrolases-like superfamily protein	LOC_Os07g47620	universal stress protein domain containing protein
TraesCS3A02G054200	black	Seedling	AT2G25530		AFG1-like ATPase family protein	LOC_Os03g63500	ATPase
TraesCS3A02G432900	black	Seedling	AT4G22950	AGL19	Agamous-like MADS-box protein AGL19	LOC_Os01g69850	OsMADS65 - MADS-box family gene with MIKC* type-box
TraesCS1D02G084700	black	Seedling	AT5G52070		Agenet domain-containing protein	LOC_Os05g04860	agenet domain containing protein
TraesCS5D02G198300	black	Seedling	AT5G08170	AIH	Agmatine deiminase	LOC_Os04g39210	agmatine deiminase
TraesCS7D02G409600	black	Seedling	AT2G24390		AIG2-like (avirulence induced gene) family protein	LOC_Os06g48960	AIG2-like family domain containing protein
TraesCS1B02G102700	black	Seedling	AT1G72330	ALAAT2	Alanine aminotransferase 2%2C mitochondrial	LOC_Os10g25130	aminotransferase
TraesCS1A02G085600	black	Seedling	AT1G72330	ALAAT2	Alanine aminotransferase 2%2C mitochondrial	LOC_Os10g25130	aminotransferase
TraesCS1A02G299100	black	Seedling	AT3G08860	PYD4	Alanine--glyoxylate aminotransferase 2 homolog 3%2C mitochondrial	LOC_Os05g39770	aminotransferase
TraesCS1B02G308900	black	Shared	AT3G08860	PYD4	Alanine--glyoxylate aminotransferase 2 homolog 3%2C mitochondrial	LOC_Os05g39770	aminotransferase
TraesCS1D02G292100	black	Shared	AT3G08860	PYD4	Alanine--glyoxylate aminotransferase 2 homolog 3%2C mitochondrial	LOC_Os05g39770	aminotransferase
TraesCS4D02G103000	black	Seedling	AT1G77120	ADH1	Alcohol dehydrogenase class-P	LOC_Os11g10510	dehydrogenase
TraesCS3D02G412700	black	Shared	AT3G24503	ALDH2C4	Aldehyde dehydrogenase family 2 member C4	LOC_Os01g40860	aldehyde dehydrogenase
TraesCS5A02G213600	black	Seedling	AT1G54100	ALDH7B4	Aldehyde dehydrogenase family 7 member B4	LOC_Os09g26880	aldehyde dehydrogenase
TraesCS3A02G391500	black	Seedling	AT3G52930		Aldolase superfamily protein	LOC_Os01g67860	fructose-bisphospate aldolase isozyme
TraesCS3D02G384000	black	Seedling	AT3G52930		Aldolase superfamily protein	LOC_Os01g67860	fructose-bisphospate aldolase isozyme
TraesCS3B02G473800	black	Seedling	AT5G13420		Aldolase-type TIM barrel family protein	LOC_Os01g70170	transaldolase
TraesCS3A02G439800	black	Seedling	AT5G13420		Aldolase-type TIM barrel family protein	LOC_Os01g70170	transaldolase
TraesCS7B02G383900	black	Seedling	AT4G20070	AAH	Allantoate deiminase	LOC_Os06g45480	hydrolase
TraesCS2D02G565300	black	Germination	AT4G04955	ALN	Allantoinase	LOC_Os04g58390	allantoinase
TraesCS1B02G266200	black	Shared	AT1G10740		alpha/beta-Hydrolases superfamily protein	LOC_Os05g33820	lipase
TraesCS1A02G218000	black	Shared	AT3G60340		alpha/beta-Hydrolases superfamily protein	LOC_Os10g41340	palmitoyl-protein thioesterase 1 precursor
TraesCS5D02G425500	black	Seedling	AT5G09430		alpha/beta-Hydrolases superfamily protein	LOC_Os10g22960	hydrolase protein
TraesCS1D02G219700	black	Seedling	AT3G60340		alpha/beta-Hydrolases superfamily protein	LOC_Os10g41340	palmitoyl-protein thioesterase 1 precursor
TraesCS7D02G386800	black	Seedling	AT3G30380		alpha/beta-Hydrolases superfamily protein	LOC_Os06g42730	OsPOP14 - Putative Prolyl Oligopeptidase homologue
TraesCS3B02G549000	black	Seedling	AT3G01420	DOX1	Alpha-dioxygenase 1	LOC_Os12g26290	alpha-DOX2
TraesCS3B02G549200	black	Shared	AT3G01420	DOX1	Alpha-dioxygenase 1	LOC_Os12g26290	alpha-DOX2
TraesCS3A02G366400	black	Seedling	AT3G46970	PHS2	Alpha-glucan phosphorylase 2%2C cytosolic	LOC_Os01g63270	alpha-glucan phosphorylast isozyme
TraesCS2A02G064000	black	Germination	AT4G34880		Amidase family protein	LOC_Os04g10460	amidase
TraesCS2A02G268200	black	Seedling	AT5G49630	AAP6	Amino acid permease 6	LOC_Os07g04180	amino acid transporter
TraesCS5A02G472600	black	Shared	AT3G11900	ANT1	Amino acid transporter ANT1	LOC_Os03g60260	ANT1
TraesCS3B02G247500	black	Seedling	AT2G01170	BAT1	Amino-acid permease BAT1	LOC_Os01g42234	amino acid permease family protein
TraesCS6B02G213700	black	Seedling	AT4G33090	APM1	Aminopeptidase M1	LOC_Os02g12650	puromycin-sensitive aminopeptidase
TraesCS2D02G084300	black	Seedling	AT2G38280	AMPD	AMP deaminase	LOC_Os07g49270	AMP deaminase
TraesCS6A02G004600	black	Seedling	AT5G61230		Ankyrin repeat family protein	LOC_Os02g01240	CPuORF11 - conserved peptide uORF-containing transcript
TraesCS5D02G343400	black	Seedling	AT1G03670		ankyrin repeat family protein	LOC_Os11g08050	expressed protein
TraesCS7B02G124700	black	Seedling	AT4G11000		Ankyrin repeat family protein	LOC_Os06g19370	cadmium tolerance factor
TraesCS2B02G597300	black	Seedling	AT5G61230		Ankyrin repeat family protein	LOC_Os02g01240	CPuORF11 - conserved peptide uORF-containing transcript
TraesCS6B02G396900	black	Seedling	AT4G11000		Ankyrin repeat family protein	LOC_Os06g19010	cadmium tolerance factor
TraesCS7B02G124000	black	Seedling	AT4G11000		Ankyrin repeat family protein	LOC_Os06g18900	cadmium tolerance factor
TraesCS5A02G339200	black	Shared	AT1G03670		ankyrin repeat family protein	LOC_Os11g08050	expressed protein
TraesCS7D02G218300	black	Shared	AT4G11000		Ankyrin repeat family protein	LOC_Os06g18900	cadmium tolerance factor
TraesCS7A02G217700	black	Seedling	AT4G11000		Ankyrin repeat family protein	LOC_Os06g19370	cadmium tolerance factor
TraesCS5B02G132500	black	Shared	AT4G11000		Ankyrin repeat family protein	LOC_Os11g04830	embryogenesis transmembrane protein
TraesCS3B02G046200	black	Shared	AT1G03670		ankyrin repeat family protein	LOC_Os11g24780	expressed protein
TraesCS6D02G006600	black	Seedling	AT5G61230		Ankyrin repeat family protein	LOC_Os02g01240	CPuORF11 - conserved peptide uORF-containing transcript
TraesCS6D02G346400	black	Seedling	AT4G03450		Ankyrin repeat family protein	LOC_Os06g19010	cadmium tolerance factor
TraesCS1A02G239700	black	Shared	AT2G38760	ANN3	Annexin D3	LOC_Os05g31760	annexin
TraesCS1A02G239600	black	Shared	AT2G38750	ANN4	Annexin D4	LOC_Os05g31750	annexin
TraesCS3B02G531500	black	Shared	AT1G68090	ANN5	Annexin D5	LOC_Os09g23160	annexin
TraesCS2B02G507700	black	Seedling	AT1G61720	BAN	Anthocyanidin reductase	LOC_Os04g53850	leucoanthocyanidin reductase
TraesCS4D02G215100	black	Seedling	AT2G29690	ASA2	Anthranilate synthase alpha subunit 2%2C chloroplastic	LOC_Os03g15780	anthranilate synthase component I-1
TraesCS4A02G089800	black	Seedling	AT2G29690	ASA2	Anthranilate synthase alpha subunit 2%2C chloroplastic	LOC_Os03g15780	anthranilate synthase component I-1
TraesCS4B02G214500	black	Seedling	AT2G29690	ASA2	Anthranilate synthase alpha subunit 2%2C chloroplastic	LOC_Os03g15780	anthranilate synthase component I-1
TraesCS3A02G054000	black	Seedling	AT1G68840	RAV2	AP2/ERF and B3 domain-containing transcription repressor RAV2	LOC_Os01g04800	B3 DNA binding domain containing protein
TraesCS5A02G532000	black	Seedling	AT3G04080	APY1	Apyrase 1	LOC_Os11g03290	nucleoside-triphosphatase
TraesCS4D02G357100	black	Shared	AT3G04080	APY1	Apyrase 1	LOC_Os11g03290	nucleoside-triphosphatase
TraesCS4B02G363700	black	Seedling	AT3G04080	APY1	Apyrase 1	LOC_Os11g03290	nucleoside-triphosphatase
TraesCS7A02G553000	black	Seedling	AT4G18910	NIP1-2	Aquaporin NIP1-2	LOC_Os05g11560	aquaporin protein
TraesCS5D02G347600	black	Seedling	AT4G18910	NIP1-2	Aquaporin NIP1-2	LOC_Os05g11560	aquaporin protein
TraesCS3A02G310400	black	Seedling	AT4G26300	emb1027	Arginyl-tRNA synthetase%2C class Ic	LOC_Os01g06510	arginyl-tRNA synthetase
TraesCS3B02G556300	black	Seedling	AT1G08315		ARM repeat superfamily protein	LOC_Os01g72600	spotted leaf 11
TraesCS4D02G163500	black	No DEG	AT1G12930		ARM repeat superfamily protein	LOC_Os11g34120	exportin 1
TraesCS1A02G412200	black	Shared	AT2G27430		ARM repeat superfamily protein	LOC_Os05g49810	armadillo/beta-catenin-like repeat containing protein
TraesCS5B02G152600	black	Shared	AT3G47340	ASN1	Asparagine synthetase	LOC_Os06g15420	asparagine synthetase
TraesCS3B02G331100	black	Seedling	AT5G11520	ASP3	Aspartate aminotransferase 3%2C chloroplastic	LOC_Os01g55540	aminotransferase
TraesCS5D02G048600	black	Shared	AT1G09620		ATP binding%3Bleucine-tRNA ligases%3Baminoacyl-tRNA ligases%3Bnucleotide binding%3BATP binding%3Baminoacyl-tRNA ligases	LOC_Os09g32650	leucyl-tRNA synthetase
TraesCS1D02G346200	black	No DEG	AT5G56630	PFK7	ATP-dependent 6-phosphofructokinase 7	LOC_Os05g44922	6-phosphofructokinase
TraesCS5B02G523700	black	Shared	AT2G26140	FTSH4	ATP-dependent zinc metalloprotease FTSH 4%2C mitochondrial	LOC_Os01g39260	OsFtsH5 FtsH protease
TraesCS6D02G221200	black	Seedling	AT3G49590		Autophagy-related protein 13	LOC_Os02g43040	expressed protein
TraesCS6A02G238900	black	Seedling	AT3G49590		Autophagy-related protein 13	LOC_Os02g43040	expressed protein
TraesCS5A02G354300	black	Shared	AT5G65980		Auxin efflux carrier family protein	LOC_Os09g38130	auxin efflux carrier component
TraesCS7A02G461700	black	Seedling	AT1G30330	ARF6	Auxin response factor 6	LOC_Os06g46410	auxin response factor
TraesCS5B02G104100	black	Seedling	AT4G02980	ERABP1	Auxin-binding protein 1	LOC_Os12g34450	auxin-binding protein 4 precursor
TraesCS3A02G121300	black	Shared	AT3G04730	IAA16	Auxin-responsive protein IAA16	LOC_Os01g08320	OsIAA1 - Auxin-responsive Aux/IAA gene family member
TraesCS3B02G140700	black	Shared	AT1G04250	IAA17	Auxin-responsive protein IAA17	LOC_Os01g08320	OsIAA1 - Auxin-responsive Aux/IAA gene family member
TraesCS7D02G339300	black	Shared	AT4G29080	IAA27	Auxin-responsive protein IAA27	LOC_Os06g22870	OsIAA21 - Auxin-responsive Aux/IAA gene family member
TraesCS5A02G363800	black	Seedling	AT3G18990	VRN1	B3 domain-containing transcription factor VRN1	LOC_Os12g40070	B3 DNA binding domain containing protein
TraesCS4B02G044700	black	Shared	AT2G02850	ARPN	Basic blue protein	LOC_Os03g50160	plastocyanin-like domain containing protein
TraesCS2B02G367200	black	No DEG	AT1G05710		basic helix-loop-helix (bHLH) DNA-binding superfamily protein	LOC_Os04g41570	ethylene-responsive protein related
TraesCS5B02G059200	black	Seedling	AT3G54620	BZIP25	Basic leucine zipper 25	LOC_Os12g40920	bZIP transcription factor domain containing protein
TraesCS5D02G068800	black	Shared	AT5G28770	BZIP63	Basic leucine zipper 63	LOC_Os12g40920	bZIP transcription factor domain containing protein
TraesCS5A02G057500	black	Seedling	AT5G28770	BZIP63	Basic leucine zipper 63	LOC_Os12g40920	bZIP transcription factor domain containing protein
TraesCS5A02G440400	black	Seedling	AT5G28770	BZIP63	Basic leucine zipper 63	LOC_Os03g58250	bZIP transcription factor domain containing protein
TraesCS5D02G447500	black	Seedling	AT5G28770	BZIP63	Basic leucine zipper 63	LOC_Os03g58250	bZIP transcription factor domain containing protein
TraesCS3A02G196200	black	Seedling	AT5G47120	BI-1	Bax inhibitor 1	LOC_Os02g03280	transmembrane BAX inhibitor motif-containing protein
TraesCS5A02G317100	black	Seedling	AT4G38960	BBX19	B-box zinc finger protein 19	LOC_Os09g35880	B-box zinc finger family protein
TraesCS4A02G022700	black	Shared	AT4G34610	BLH6	BEL1-like homeodomain protein 6	LOC_Os03g06930	homeodomain protein
TraesCS4D02G279300	black	Germination	AT4G34610	BLH6	BEL1-like homeodomain protein 6	LOC_Os03g06930	homeodomain protein
TraesCS3B02G254100	black	Seedling	AT1G64140		BEST Arabidopsis thaliana protein match is: loricrin-related (TAIR:AT5G64550.1)%3B Has 3596 Blast hits to 2004 proteins in 150 species: Archae - 0%3B Bacteria - 54%3B Metazoa - 1597%3B Fungi - 38%3B Plants - 513%3B Viruses - 9%3B Other Eukaryotes - 1385 (source: /.../Link).	LOC_Os01g43370	CPuORF17 - conserved peptide uORF-containing transcript
TraesCS3D02G229000	black	Seedling	AT1G64140		BEST Arabidopsis thaliana protein match is: loricrin-related (TAIR:AT5G64550.1)%3B Has 3596 Blast hits to 2004 proteins in 150 species: Archae - 0%3B Bacteria - 54%3B Metazoa - 1597%3B Fungi - 38%3B Plants - 513%3B Viruses - 9%3B Other Eukaryotes - 1385 (source: /.../Link).	LOC_Os01g43370	CPuORF17 - conserved peptide uORF-containing transcript
TraesCS7B02G093500	black	Seedling	AT1G26810	B3GALT15	Beta-1%2C3-galactosyltransferase 15	LOC_Os06g12390	galactosyltransferase family protein
TraesCS1A02G312700	black	Shared	AT5G20340	BG5	beta-1%2C3-glucanase 5	LOC_Os05g41610	glycosyl hydrolases family 17
TraesCS1B02G324300	black	Shared	AT5G20340	BG5	beta-1%2C3-glucanase 5	LOC_Os05g41610	glycosyl hydrolases family 17
TraesCS6A02G209000	black	Seedling	AT5G14480		beta-1%2C4-N-acetylglucosaminyltransferase family protein	LOC_Os02g38160	glycosyl transferase family 17 protein
TraesCS4A02G052200	black	Germination	AT5G09730	BXL3	Beta-D-xylosidase 3	LOC_Os11g18730	glycosyl hydrolase family 3 protein
TraesCS2A02G488900	black	Shared	AT1G55120	CWINV3	Beta-fructofuranosidase%2C insoluble isoenzyme CWINV3	LOC_Os09g08072	glycosyl hydrolases
TraesCS2D02G489200	black	Seedling	AT1G55120	CWINV3	Beta-fructofuranosidase%2C insoluble isoenzyme CWINV3	LOC_Os09g08072	glycosyl hydrolases
TraesCS7A02G246300	black	Shared	AT2G44480	BGLU17	Beta-glucosidase 17	LOC_Os08g39860	Os8bglu27 - beta-glucosidase homologue
TraesCS5B02G265500	black	Shared	AT2G44480	BGLU17	Beta-glucosidase 17	LOC_Os09g31410	Os9bglu29 - beta-glucosidase homologue
TraesCS7B02G221100	black	Shared	AT1G33700		Beta-glucosidase%2C GBA2 type family protein	LOC_Os08g01940	non-lysosomal glucosylceramidase
TraesCS6B02G408100	black	Seedling	AT1G74920	ALDH10A8	Betaine aldehyde dehydrogenase 1%2C chloroplastic	LOC_Os08g32870	aldehyde dehydrogenase
TraesCS2D02G326900	black	Seedling	AT3G48170	ALDH10A9	Betaine aldehyde dehydrogenase 2%2C mitochondrial	LOC_Os04g39020	aldehyde dehydrogenase
TraesCS2A02G336000	black	Seedling	AT3G48170	ALDH10A9	Betaine aldehyde dehydrogenase 2%2C mitochondrial	LOC_Os04g39020	aldehyde dehydrogenase
TraesCS3B02G441800	black	Seedling	AT1G21460	SWEET1	Bidirectional sugar transporter SWEET1	LOC_Os01g65880	nodulin MtN3 family protein
TraesCS7B02G050500	black	Seedling	AT5G13170	SWEET15	Bidirectional sugar transporter SWEET15	LOC_Os02g30910	nodulin MtN3 family protein
TraesCS5D02G019800	black	Seedling	AT2G36530	ENO2	Bifunctional enolase 2/transcriptional activator	LOC_Os06g04510	enolase
TraesCS4D02G051200	black	Shared	AT2G45180		Bifunctional inhibitor/lipid-transfer protein/seed storage 2S albumin superfamily protein	LOC_Os03g50960	LTPL118 - Protease inhibitor/seed storage/LTP family protein precursor
TraesCS3D02G415400	black	Seedling	AT5G55450		Bifunctional inhibitor/lipid-transfer protein/seed storage 2S albumin superfamily protein	LOC_Os01g68580	LTPL38 - Protease inhibitor/seed storage/LTP family protein precursor
TraesCS4D02G236800	black	Shared	AT3G49680	BCAT3	Branched-chain-amino-acid aminotransferase 3%2C chloroplastic	LOC_Os03g12890	aminotransferase domain containing protein
TraesCS4A02G059800	black	Shared	AT3G49680	BCAT3	Branched-chain-amino-acid aminotransferase 3%2C chloroplastic	LOC_Os03g12890	aminotransferase domain containing protein
TraesCS2D02G526900	black	Seedling	AT5G19000	BPM1	BTB/POZ and MATH domain-containing protein 1	LOC_Os02g20720	MBTB2 - Bric-a-Brac
TraesCS5D02G447600	black	Seedling	AT3G06190	BPM2	BTB/POZ and MATH domain-containing protein 2	LOC_Os10g29410	MBTB53 - Bric-a-Brac
TraesCS3A02G413600	black	Shared	AT3G48360	BT2	BTB/POZ and TAZ domain-containing protein 2	LOC_Os01g68020	BTBZ2 - Bric-a-Brac
TraesCS2B02G359600	black	Shared	AT3G48360	BT2	BTB/POZ and TAZ domain-containing protein 2	LOC_Os04g40630	BTBZ4 - Bric-a-Brac
TraesCS4A02G236100	black	Seedling	AT5G67440	NPY3	BTB/POZ domain-containing protein NPY3	LOC_Os03g41350	BTBN7 - Bric-a-Brac
TraesCS6A02G357400	black	Seedling	AT3G59660		C2 domain-containing protein / GRAM domain-containing protein	LOC_Os09g34130	GRAM domain containing protein
TraesCS5D02G491100	black	Seedling	AT3G46070		C2H2-type zinc finger family protein	LOC_Os03g60570	ZOS3-22 - C2H2 zinc finger protein
TraesCS4A02G123100	black	Seedling	AT5G49480	ATCP1	Ca2+-binding protein 1	LOC_Os03g19720	EF hand family protein
TraesCS7B02G320100	black	Seedling	AT4G30110	HMA2	Cadmium/zinc-transporting ATPase HMA2	LOC_Os07g12900	cadmium/zinc-transporting ATPase
TraesCS7A02G419500	black	Seedling	AT4G30110	HMA2	Cadmium/zinc-transporting ATPase HMA2	LOC_Os07g12900	cadmium/zinc-transporting ATPase
TraesCS3A02G053300	black	Germination	AT4G33000	CBL10	Calcineurin B-like protein 10	LOC_Os01g39770	calcineurin B
TraesCS1A02G168600	black	Seedling	AT2G23790		Calcium uniporter protein 2%2C mitochondrial	LOC_Os10g35770	E2F-related protein
TraesCS3A02G492500	black	Seedling	AT1G76640	CML39	Calcium-binding protein CML39	LOC_Os01g72530	OsCML31 - Calmodulin-related calcium sensor protein
TraesCS5D02G348900	black	No DEG	AT4G20780	CML42	Calcium-binding protein CML42	LOC_Os05g24780	OsCML21 - Calmodulin-related calcium sensor protein
TraesCS5A02G343000	black	Shared	AT4G20780	CML42	Calcium-binding protein CML42	LOC_Os05g24780	OsCML21 - Calmodulin-related calcium sensor protein
TraesCS2A02G199700	black	Seedling	AT1G18890	CPK10	Calcium-dependent protein kinase 10	LOC_Os03g59390	CAMK_CAMK_like.24 - CAMK includes calcium/calmodulin depedent protein kinases
TraesCS4D02G318400	black	Seedling	AT1G35670	CPK11	Calcium-dependent protein kinase 11	LOC_Os12g07230	CAMK_CAMK_like.45 - CAMK includes calcium/calmodulin depedent protein kinases
TraesCS2A02G456100	black	Seedling	AT4G21940	CPK15	Calcium-dependent protein kinase 15	LOC_Os11g04170	CAMK_CAMK_like.42 - CAMK includes calcium/calmodulin depedent protein kinases
TraesCS2B02G478100	black	Seedling	AT4G21940	CPK15	Calcium-dependent protein kinase 15	LOC_Os05g50810	CAMK_CAMK_like.5 - CAMK includes calcium/calmodulin depedent protein kinases
TraesCS2D02G456400	black	Seedling	AT4G21940	CPK15	Calcium-dependent protein kinase 15	LOC_Os07g33110	CAMK_CAMK_like.33 - CAMK includes calcium/calmodulin depedent protein kinases
TraesCS5A02G490200	black	Seedling	AT3G10660	CPK2	Calcium-dependent protein kinase 2	LOC_Os12g30150	CAMK_CAMK_like.47 - CAMK includes calcium/calmodulin depedent protein kinases
TraesCS4B02G321800	black	Shared	AT3G10660	CPK2	Calcium-dependent protein kinase 2	LOC_Os03g57510	CAMK_CAMK_like.23 - CAMK includes calcium/calmodulin depedent protein kinases
TraesCS6B02G111800	black	Seedling	AT5G66210	CPK28	Calcium-dependent protein kinase 28	LOC_Os02g03410	CAMK_CAMK_like.12 - CAMK includes calcium/calmodulin depedent protein kinases
TraesCSU02G016900	black	Seedling	AT5G66210	CPK28	Calcium-dependent protein kinase 28	LOC_Os02g03410	CAMK_CAMK_like.12 - CAMK includes calcium/calmodulin depedent protein kinases
TraesCS6A02G089400	black	Seedling	AT5G66210	CPK28	Calcium-dependent protein kinase 28	LOC_Os02g03410	CAMK_CAMK_like.12 - CAMK includes calcium/calmodulin depedent protein kinases
TraesCS2D02G207400	black	Seedling	AT1G74740	CPK30	Calcium-dependent protein kinase 30	LOC_Os03g59390	CAMK_CAMK_like.24 - CAMK includes calcium/calmodulin depedent protein kinases
TraesCS1A02G047000	black	Seedling	AT1G07670	ECA4	Calcium-transporting ATPase 4%2C endoplasmic reticulum-type	LOC_Os03g17310	calcium-transporting ATPase
TraesCSU02G003600	black	Shared	AT3G21180	ACA9	Calcium-transporting ATPase 9%2C plasma membrane-type	LOC_Os11g04460	calcium-transporting ATPase
TraesCS3D02G246000	black	Seedling	AT4G03550	CALS12	Callose synthase 12	LOC_Os03g03610	1
TraesCS4D02G346600	black	No DEG	AT3G07160	CALS9	Callose synthase 9	LOC_Os02g58560	1
TraesCS1A02G308700	black	Germination	AT3G43810	CAM7	Calmodulin-7	LOC_Os05g41200	OsCML9 - Calmodulin-related calcium sensor protein
TraesCS6A02G151200	black	Seedling	AT2G18750	CBP60C	Calmodulin-binding protein 60 C	LOC_Os02g35470	calmodulin binding protein
TraesCS2B02G377100	black	Seedling	AT2G11520	CRCK3	Calmodulin-binding receptor-like cytoplasmic kinase 3	LOC_Os09g03620	wall-associated receptor kinase-like 20 precursor
TraesCS4B02G306300	black	Seedling	AT5G64220	CMTA2	Calmodulin-binding transcription activator 2	LOC_Os03g09100	calmodulin-binding transcription activator
TraesCS2D02G237300	black	Seedling	AT4G16150	CMTA5	Calmodulin-binding transcription activator 5	LOC_Os07g30774	calmodulin-binding transcription activator 5
TraesCS3A02G206600	black	Seedling	AT1G29900	CARB	Carbamoyl-phosphate synthase large chain%2C chloroplastic	LOC_Os01g38970	carbamoyl-phosphate synthase large chain
TraesCS2B02G278700	black	No DEG	AT5G67380	CKA1	Casein kinase II subunit alpha-1	LOC_Os07g02350	casein kinase II subunit alpha-2
TraesCS3B02G181900	black	No DEG	AT4G28880	ckl3	casein kinase I-like 3	LOC_Os01g13060	CK1_CaseinKinase_1.1 - CK1 includes the casein kinase 1 kinases
TraesCS4A02G049200	black	Seedling	AT2G28370		CASP-like protein 5A2	LOC_Os03g10870	membrane associated DUF588 domain containing protein
TraesCS1B02G155400	black	Germination	AT5G36940	CAT3	Cationic amino acid transporter 3%2C mitochondrial	LOC_Os10g30090	amino acid permease
TraesCS1D02G082200	black	No DEG	AT3G17510	CIPK1	CBL-interacting serine/threonine-protein kinase 1	LOC_Os05g04550	CAMK_KIN1/SNF1/Nim1_like.3 - CAMK includes calcium/calmodulin depedent protein kinases
TraesCS1D02G082500	black	Shared	AT3G17510	CIPK1	CBL-interacting serine/threonine-protein kinase 1	LOC_Os05g04550	CAMK_KIN1/SNF1/Nim1_like.3 - CAMK includes calcium/calmodulin depedent protein kinases
TraesCS1A02G080600	black	Germination	AT3G17510	CIPK1	CBL-interacting serine/threonine-protein kinase 1	LOC_Os05g04550	CAMK_KIN1/SNF1/Nim1_like.3 - CAMK includes calcium/calmodulin depedent protein kinases
TraesCS4A02G136500	black	Shared	AT5G58380	CIPK10	CBL-interacting serine/threonine-protein kinase 10	LOC_Os03g22050	CAMK_KIN1/SNF1/Nim1_like.16 - CAMK includes calcium/calmodulin depedent protein kinases
TraesCS3D02G136700	black	Seedling	AT4G18700	CIPK12	CBL-interacting serine/threonine-protein kinase 12	LOC_Os01g10870	CAMK_KIN1/SNF1/Nim1_like.7 - CAMK includes calcium/calmodulin depedent protein kinases
TraesCS3A02G135700	black	Seedling	AT4G18700	CIPK12	CBL-interacting serine/threonine-protein kinase 12	LOC_Os01g10870	CAMK_KIN1/SNF1/Nim1_like.7 - CAMK includes calcium/calmodulin depedent protein kinases
TraesCS2A02G107000	black	No DEG	AT5G01810	CIPK15	CBL-interacting serine/threonine-protein kinase 15	LOC_Os07g48100	CAMK_KIN1/SNF1/Nim1_like.31 - CAMK includes calcium/calmodulin depedent protein kinases
TraesCS5A02G118800	black	No DEG	AT3G52950	CBSCBSPB3	CBS domain-containing protein CBSCBSPB3	LOC_Os12g07190	CBS domain-containing protein
TraesCS1D02G389300	black	Seedling	AT1G15110	PSS1	CDP-diacylglycerol--serine O-phosphatidyltransferase 1	LOC_Os05g48060	phosphatidylserine synthase
TraesCS1A02G381500	black	Seedling	AT1G15110	PSS1	CDP-diacylglycerol--serine O-phosphatidyltransferase 1	LOC_Os05g48060	phosphatidylserine synthase
TraesCS4D02G267600	black	Seedling	AT5G03340	CDC48E	Cell division control protein 48 homolog E	LOC_Os03g05730	cell division control protein 48 homolog E
TraesCS4A02G035500	black	Seedling	AT5G03340	CDC48E	Cell division control protein 48 homolog E	LOC_Os03g05730	cell division control protein 48 homolog E
TraesCS4B02G268200	black	Seedling	AT5G03340	CDC48E	Cell division control protein 48 homolog E	LOC_Os03g05730	cell division control protein 48 homolog E
TraesCS3B02G034600	black	Seedling	AT2G32540	CSLB4	Cellulose synthase-like protein B4	LOC_Os10g20090	CSLH1 - cellulose synthase-like family H
TraesCS3D02G094800	black	No DEG	AT4G23990	CSLG3	Cellulose synthase-like protein G3	LOC_Os01g54620	CESA4 - cellulose synthase
TraesCS6A02G068300	black	Seedling	AT4G31290		ChaC-like family protein	LOC_Os02g26700	cation transport regulator-like protein 1
TraesCS4B02G226300	black	No DEG	AT2G17880		Chaperone DnaJ-domain superfamily protein	LOC_Os08g43490	heat shock protein DnaJ
TraesCS7D02G160400	black	Shared	AT3G14200		Chaperone DnaJ-domain superfamily protein	LOC_Os02g54130	heat shock protein DnaJ
TraesCS6D02G289600	black	Seedling	AT1G24120	ATJ16	Chaperone protein dnaJ 16	LOC_Os02g50760	heat shock protein DnaJ
TraesCS2B02G326900	black	Seedling	AT5G49890	CLC-C	Chloride channel protein CLC-c	ChrSy.fgenesh.mRNA	expressed protein
TraesCS3D02G254500	black	Seedling	AT4G35440	CLC-E	Chloride channel protein CLC-e	LOC_Os01g50860	chloride transporter
TraesCS3B02G285500	black	Seedling	AT4G35440	CLC-E	Chloride channel protein CLC-e	LOC_Os01g50860	chloride transporter
TraesCS1B02G159900	black	Seedling	AT5G22920		CHY-type/CTCHY-type/RING-type Zinc finger protein	LOC_Os10g31850	RING finger and CHY zinc finger domain-containing protein 1
TraesCS6A02G381700	black	Shared	AT1G15950	CCR1	Cinnamoyl-CoA reductase 1	LOC_Os02g56680	dehydrogenase
TraesCS5D02G333800	black	Shared	AT4G31180		Class II aminoacyl-tRNA and biotin synthetases superfamily protein	LOC_Os02g46130	tRNA synthetases class II domain containing protein
TraesCS5B02G152300	black	Seedling	AT3G11130	CHC1	Clathrin heavy chain 1	LOC_Os11g01380	clathrin heavy chain
TraesCS5A02G153500	black	Seedling	AT3G11130	CHC1	Clathrin heavy chain 1	LOC_Os11g01380	clathrin heavy chain
TraesCSU02G053700	black	Seedling	AT5G40690		CONTAINS InterPro DOMAIN/s: EF-Hand 1%2C calcium-binding site (InterPro:IPR018247)%3B BEST Arabidopsis thaliana protein match is: unknown protein (TAIR:AT2G41730.1)%3B Has 1807 Blast hits to 1807 proteins in 277 species: Archae - 0%3B Bacteria - 0%3B Metazoa /.../ Fungi - 347%3B Plants - 385%3B Viruses - 0%3B Other Eukaryotes - 339 (source: NCBI BLink).	LOC_Os05g23130	expressed protein
TraesCS3D02G524000	black	Shared	AT5G40690		CONTAINS InterPro DOMAIN/s: EF-Hand 1%2C calcium-binding site (InterPro:IPR018247)%3B BEST Arabidopsis thaliana protein match is: unknown protein (TAIR:AT2G41730.1)%3B Has 1807 Blast hits to 1807 proteins in 277 species: Archae - 0%3B Bacteria - 0%3B Metazoa /.../ Fungi - 347%3B Plants - 385%3B Viruses - 0%3B Other Eukaryotes - 339 (source: NCBI BLink).	LOC_Os05g23130	expressed protein
TraesCS5B02G319400	black	Shared	AT5G17280		CONTAINS InterPro DOMAIN/s: Oxidoreductase-like%2C N-terminal (InterPro:IPR019180)%3B Has 1807 Blast hits to 1807 proteins in 277 species: Archae - 0%3B Bacteria - 0%3B Metazoa - 736%3B Fungi - 347%3B Plants - 385%3B Viruses - 0%3B Other Eukaryotes - 339 (source: N /.../ink).	LOC_Os09g36110	OsSub59 - Putative Subtilisin homologue
TraesCS6D02G108600	black	Seedling	AT4G31570		CONTAINS InterPro DOMAIN/s: Prefoldin (InterPro:IPR009053)%3B BEST Arabidopsis thaliana protein match is: unknown protein (TAIR:AT1G24460.1)%3B Has 194354 Blast hits to 66887 proteins in 3244 species: Archae - 3688%3B Bacteria - 38556%3B Metazoa - 84828%3B Fu /.../17265%3B Plants - 10589%3B Viruses - 805%3B Other Eukaryotes - 38623 (source: NCBI BLink).	LOC_Os02g05490	expressed protein
TraesCS2D02G335300	black	Seedling	AT2G42490		Copper amine oxidase family protein	LOC_Os04g40040	copper methylamine oxidase precursor
TraesCSU02G032600	black	Shared	AT5G23760		Copper transport protein family	LOC_Os03g02070	heavy-metal-associated domain-containing protein
TraesCS5A02G554100	black	Seedling	AT5G23760		Copper transport protein family	LOC_Os10g36200	heavy metal-associated domain containing protein
TraesCS7A02G488000	black	Seedling	AT1G11960		CSC1-like protein At1g11960	LOC_Os05g51630	early-responsive to dehydration protein-related
TraesCS5B02G158200	black	Seedling	AT4G35220		Cyclase family protein	LOC_Os09g02270	cyclase family protein
TraesCS2B02G118000	black	Shared	AT5G39660	CDF2	Cyclic dof factor 2	LOC_Os07g48570	expressed protein
TraesCS7B02G072600	black	Seedling	AT4G18930		Cyclic phosphodiesterase	LOC_Os05g44170	cyclic phosphodiesterase
TraesCS3B02G183400	black	Seedling	AT1G44110	CYCA1-1	Cyclin-A1-1	LOC_Os01g13260	cyclin-A1
TraesCS3B02G561200	black	Seedling	AT5G10270	CDKC-1	Cyclin-dependent kinase C-1	LOC_Os01g72790	cyclin-dependent kinase
TraesCS2D02G389800	black	Germination	AT2G44740	CYCU4-1	Cyclin-U4-1	LOC_Os04g46000	cyclin
TraesCS2A02G391500	black	Germination	AT5G07450	CYCU4-2	Cyclin-U4-2	LOC_Os04g46000	cyclin
TraesCS3A02G331500	black	Seedling	AT3G12490	CYS6	Cysteine proteinase inhibitor 6	LOC_Os01g58890	cysteine proteinase inhibitor precursor protein
TraesCS6B02G434700	black	Seedling	AT5G04250		Cysteine proteinases superfamily protein	LOC_Os02g57410	OTU-like cysteine protease family protein
TraesCS7A02G102800	black	Seedling	AT3G59760	OASC	Cysteine synthase%2C mitochondrial	LOC_Os06g05700	cysteine synthase
TraesCS2B02G240900	black	Shared	AT4G23180	CRK10	Cysteine-rich receptor-like protein kinase 10	LOC_Os07g35290	TKL_IRAK_DUF26-lc.10 - DUF26 kinases have homology to DUF26 containing loci
TraesCS3D02G097000	black	Seedling	AT1G70520	CRK2	Cysteine-rich receptor-like protein kinase 2	LOC_Os01g36790	TKL_IRAK_DUF26-lf.2 - DUF26 kinases have homology to DUF26 containing loci
TraesCS2D02G203200	black	Shared	AT4G05200	CRK25	Cysteine-rich receptor-like protein kinase 25	LOC_Os11g11890	protein kinase domain containing protein
TraesCS2B02G222900	black	Shared	AT4G05200	CRK25	Cysteine-rich receptor-like protein kinase 25	LOC_Os11g11890	protein kinase domain containing protein
TraesCS2A02G092000	black	Seedling	AT4G38830	CRK26	Cysteine-rich receptor-like protein kinase 26	LOC_Os10g12620	protein kinase domain containing protein
TraesCS5D02G478700	black	No DEG	AT4G21410	CRK29	Cysteine-rich receptor-like protein kinase 29	LOC_Os04g12080	TKL_IRAK_DUF26-lc.7 - DUF26 kinases have homology to DUF26 containing loci
TraesCS2A02G217600	black	Shared	AT4G23280	CRK20	cysteine-rich RLK (RECEPTOR-like protein kinase) 20	LOC_Os07g35004	TKL_IRAK_DUF26-la.4 - DUF26 kinases have homology to DUF26 containing loci
TraesCS4D02G265100	black	Seedling	AT5G47530		Cytochrome b561 and DOMON domain-containing protein At5g47530	LOC_Os03g09880	AIR12
TraesCS1B02G465000	black	Germination	AT3G50930	BCS1	cytochrome BC1 synthesis	LOC_Os05g51130	mitochondrial chaperone BCS1
TraesCS1B02G464800	black	Shared	AT3G50930	BCS1	cytochrome BC1 synthesis	LOC_Os05g51130	mitochondrial chaperone BCS1
TraesCS1D02G439200	black	Shared	AT3G50930	BCS1	cytochrome BC1 synthesis	LOC_Os05g51130	mitochondrial chaperone BCS1
TraesCS1D02G439500	black	Shared	AT3G50930	BCS1	cytochrome BC1 synthesis	LOC_Os05g51130	mitochondrial chaperone BCS1
TraesCS1B02G273900	black	Seedling	AT1G22840	CYTC-1	Cytochrome c-1	LOC_Os05g34770	cytochrome c
TraesCS4D02G309900	black	Seedling	AT2G26170	CYP711A1	Cytochrome P450 711A1	LOC_Os01g50590	cytochrome P450
TraesCS7B02G469000	black	Seedling	AT5G24960	CYP71A14	Cytochrome P450 71A14	LOC_Os06g43384	cytochrome P450
TraesCS5B02G318100	black	Seedling	AT3G48300	CYP71A23	Cytochrome P450 71A23	LOC_Os09g36080	cytochrome P450
TraesCS3D02G160300	black	Shared	AT3G48280	CYP71A25	Cytochrome P450 71A25	LOC_Os01g12750	cytochrome P450
TraesCS3A02G152700	black	Shared	AT3G48280	CYP71A25	Cytochrome P450 71A25	LOC_Os01g12750	cytochrome P450
TraesCS3B02G460900	black	No DEG	AT5G25120	CYP71B11	Cytochrome P450 71B11	LOC_Os04g10160	cytochrome P450
TraesCS4A02G445600	black	Seedling	AT3G26300	CYP71B34	Cytochrome P450 71B34	LOC_Os03g63310	cytochrome P450 71E1
TraesCS1D02G004500	black	Seedling	AT3G14680	CYP72A14	Cytochrome P450 72A14	LOC_Os01g43700	cytochrome P450 72A1
TraesCS3D02G537800	black	Shared	AT3G14690	CYP72A15	Cytochrome P450 72A15	LOC_Os01g43740	cytochrome P450 72A1
TraesCS4A02G308600	black	Germination	AT2G45550	CYP76C4	Cytochrome P450 76C4	LOC_Os03g14400	cytochrome P450
TraesCS4D02G235200	black	Seedling	AT3G50660	CYP90B1	Cytochrome P450 90B1	LOC_Os03g12660	cytochrome P450
TraesCS3A02G341300	black	Seedling	AT2G45510	CYP704A2	cytochrome P450%2C family 704%2C subfamily A%2C polypeptide 2	LOC_Os10g38110	cytochrome P450
TraesCS2B02G177300	black	Shared	AT2G46960	CYP709B1	cytochrome P450%2C family 709%2C subfamily B%2C polypeptide 1	LOC_Os07g44130	cytochrome P450 72A1
TraesCS2D02G157600	black	Shared	AT2G46960	CYP709B1	cytochrome P450%2C family 709%2C subfamily B%2C polypeptide 1	LOC_Os07g44110	cytochrome P450 72A1
TraesCS7B02G171100	black	Seedling	AT2G30750	CYP71A12	cytochrome P450%2C family 71%2C subfamily A%2C polypeptide 12	LOC_Os02g17760	cytochrome P450
TraesCS1D02G403300	black	Seedling	AT2G30750	CYP71A12	cytochrome P450%2C family 71%2C subfamily A%2C polypeptide 12	LOC_Os06g43384	cytochrome P450
TraesCS1A02G253900	black	Seedling	AT1G75130	CYP721A1	cytochrome P450%2C family 721%2C subfamily A%2C polypeptide 1	LOC_Os05g33600	cytochrome P450 72A1
TraesCS3A02G050800	black	Seedling	AT3G18270	CYP77A5P	cytochrome P450%2C family 77%2C subfamily A%2C polypeptide 5 pseudogene	LOC_Os01g04630	muconate cycloisomerase
TraesCS5D02G084200	black	Germination	AT4G37360	CYP81D2	cytochrome P450%2C family 81%2C subfamily D%2C polypeptide 2	LOC_Os12g39310	cytochrome P450
TraesCS2D02G261100	black	Seedling	AT4G37330	CYP81D4	cytochrome P450%2C family 81%2C subfamily D%2C polypeptide 4	LOC_Os03g55240	cytochrome P450
TraesCS3D02G475800	black	Seedling	AT2G41510	CKX1	Cytokinin dehydrogenase 1	LOC_Os01g71310	cytokinin dehydrogenase precursor
TraesCS3D02G213900	black	Shared	AT2G37210	LOG3	Cytokinin riboside 5'-monophosphate phosphoribohydrolase LOG3	LOC_Os01g40630	uncharacterized protein PA4923
TraesCS2D02G181000	black	Shared	AT2G03760	SOT12	Cytosolic sulfotransferase 12	LOC_Os07g41460	sulfotransferase domain containing protein
TraesCS1A02G317200	black	Seedling	AT3G27090		DCD (Development and Cell Death) domain protein	LOC_Os05g41930	N-rich protein
TraesCS3B02G149300	black	Seedling	AT3G01540	RH14	DEAD-box ATP-dependent RNA helicase 14	LOC_Os01g07740	DEAD-box ATP-dependent RNA helicase 14
TraesCS1A02G174600	black	Seedling	AT4G00660	RH8	DEAD-box ATP-dependent RNA helicase 8	LOC_Os04g45040	DEAD-box ATP-dependent RNA helicase
TraesCS5D02G317400	black	Shared	AT4G25480	DREB1A	Dehydration-responsive element-binding protein 1A	LOC_Os09g35010	dehydration-responsive element-binding protein
TraesCS5D02G317000	black	Shared	AT4G25480	DREB1A	Dehydration-responsive element-binding protein 1A	LOC_Os08g43210	AP2 domain containing protein
TraesCS6A02G253300	black	Seedling	AT1G20450	ERD10	Dehydrin ERD10	LOC_Os02g44870	dehydrin
TraesCS6D02G234700	black	Shared	AT1G20450	ERD10	Dehydrin ERD10	LOC_Os02g44870	dehydrin
TraesCS6B02G273400	black	Seedling	AT1G20450	ERD10	Dehydrin ERD10	LOC_Os02g44870	dehydrin
TraesCS1D02G280700	black	Seedling	AT2G39800	P5CSA	Delta-1-pyrroline-5-carboxylate synthase A	LOC_Os05g38150	amino acid kinase
TraesCS1A02G281400	black	Seedling	AT2G39800	P5CSA	Delta-1-pyrroline-5-carboxylate synthase A	LOC_Os05g38150	amino acid kinase
TraesCS1B02G290600	black	Seedling	AT2G39800	P5CSA	Delta-1-pyrroline-5-carboxylate synthase A	LOC_Os05g38150	amino acid kinase
TraesCS6A02G399000	black	Seedling	AT3G58180		Deoxyhypusine hydroxylase	LOC_Os12g43100	deoxyhypusine hydroxylase
TraesCS3A02G265900	black	Germination	AT1G80380	GLYK	D-glycerate 3-kinase%2C chloroplastic	LOC_Os01g48990	uncharacterized kinase mug58
TraesCS5B02G089300	black	Seedling	AT3G53580	DAPF	Diaminopimelate epimerase%2C chloroplastic	LOC_Os12g37960	diaminopimelate epimerase
TraesCS5A02G083200	black	Seedling	AT3G53580	DAPF	Diaminopimelate epimerase%2C chloroplastic	LOC_Os12g37960	diaminopimelate epimerase
TraesCS4D02G211200	black	Seedling	AT4G00550	DGD2	Digalactosyldiacylglycerol synthase 2%2C chloroplastic	LOC_Os03g16140	digalactosyldiacylglycerol synthase
TraesCS4A02G093900	black	Seedling	AT4G00550	DGD2	Digalactosyldiacylglycerol synthase 2%2C chloroplastic	LOC_Os03g16140	digalactosyldiacylglycerol synthase
TraesCS6A02G299200	black	Seedling	AT3G17810	PYD1	Dihydropyrimidine dehydrogenase (NADP(+))%2C chloroplastic	LOC_Os02g50350	dihydroorotate dihydrogenase protein
TraesCS6D02G278900	black	Seedling	AT3G17810	PYD1	Dihydropyrimidine dehydrogenase (NADP(+))%2C chloroplastic	LOC_Os02g50350	dihydroorotate dihydrogenase protein
TraesCS4A02G305500	black	Seedling	AT2G34930		disease resistance family protein / LRR family protein	LOC_Os01g41750	expressed protein
TraesCS4A02G305600	black	Shared	AT2G34930		disease resistance family protein / LRR family protein	LOC_Os01g41750	expressed protein
TraesCS7D02G087300	black	Shared	AT2G34930		disease resistance family protein / LRR family protein	LOC_Os02g17400	leucine rich repeat protein
TraesCS5D02G334000	black	Seedling	AT2G34930		disease resistance family protein / LRR family protein	LOC_Os02g17400	leucine rich repeat protein
TraesCS2D02G025700	black	Seedling	AT1G53350	RPP8L2	Disease resistance protein (CC-NBS-LRR class) family	LOC_Os08g14850	resistance protein
TraesCS2D02G541000	black	Seedling	AT1G53350	RPP8L2	Disease resistance protein (CC-NBS-LRR class) family	LOC_Os08g14850	resistance protein
TraesCS6D02G013100	black	Shared	AT3G07040	RPM1	Disease resistance protein RPM1	LOC_Os11g37870	stripe rust resistance protein Yr10
TraesCS1A02G026200	black	Seedling	AT3G07040	RPM1	Disease resistance protein RPM1	LOC_Os04g14220	disease resistance protein RPM1
TraesCS4B02G091900	black	Seedling	AT3G07040	RPM1	Disease resistance protein RPM1	LOC_Os11g11960	disease resistance protein RPM1
TraesCS6D02G385600	black	No DEG	AT1G02260		Divalent ion symporter	LOC_Os03g05390	Citrate transporter protein
TraesCS6A02G402000	black	No DEG	AT1G02260		Divalent ion symporter	LOC_Os03g05390	Citrate transporter protein
TraesCS6B02G144800	black	No DEG	AT5G24630	BIN4	DNA-binding protein BIN4	LOC_Os02g05440	expressed protein
TraesCS6A02G117100	black	No DEG	AT5G24630	BIN4	DNA-binding protein BIN4	LOC_Os02g05440	expressed protein
TraesCS1B02G347400	black	Seedling	AT1G29160	DOF1.5	Dof zinc finger protein DOF1.5	LOC_Os01g55340	dof zinc finger domain containing protein
TraesCS1A02G334100	black	Seedling	AT1G29160	DOF1.5	Dof zinc finger protein DOF1.5	LOC_Os01g55340	dof zinc finger domain containing protein
TraesCS7A02G087500	black	Seedling	AT1G56220		Dormancy/auxin associated family protein	LOC_Os08g35190	auxin-repressed protein
TraesCS4A02G386400	black	Shared	AT1G56220		Dormancy/auxin associated family protein	LOC_Os08g35190	auxin-repressed protein
TraesCS7D02G082500	black	Seedling	AT1G56220		Dormancy/auxin associated family protein	LOC_Os08g35190	auxin-repressed protein
TraesCS7D02G082600	black	Seedling	AT1G56220		Dormancy/auxin associated family protein	LOC_Os08g35190	auxin-repressed protein
TraesCS4A02G182800	black	Seedling	AT2G29970		Double Clp-N motif-containing P-loop nucleoside triphosphate hydrolases superfamily protein	LOC_Os12g01360	expressed protein
TraesCS3D02G530300	black	Germination	AT1G56280	ATDI19	drought-induced 19	LOC_Os01g73960	drought induced 19 protein
TraesCS3D02G368000	black	Shared	AT5G04760		Duplicated homeodomain-like superfamily protein	LOC_Os01g64360	MYB family transcription factor
TraesCS3B02G407700	black	Shared	AT5G04760		Duplicated homeodomain-like superfamily protein	LOC_Os01g64360	MYB family transcription factor
TraesCS3A02G273500	black	Shared	AT1G53140	DRP5A	Dynamin-related protein 5A	LOC_Os01g54420	dynamin family protein
TraesCS4A02G441400	black	Shared	AT3G63530	BB	E3 ubiquitin ligase BIG BROTHER	LOC_Os06g03580	zinc RING finger protein
TraesCS5A02G248100	black	Shared	AT3G05200	ATL6	E3 ubiquitin-protein ligase ATL6	LOC_Os09g29310	zinc finger
TraesCS5D02G254900	black	Seedling	AT3G05200	ATL6	E3 ubiquitin-protein ligase ATL6	LOC_Os08g37760	zinc finger
TraesCS2A02G112800	black	Seedling	AT1G02860	BAH1	E3 ubiquitin-protein ligase BAH1	LOC_Os07g47590	expressed protein
TraesCS1A02G005700	black	Seedling	AT1G57820	ORTH2	E3 ubiquitin-protein ligase ORTHRUS 2	LOC_Os05g01230	zinc finger
TraesCS6A02G236100	black	Shared	AT4G27470	RMA3	E3 ubiquitin-protein ligase RMA3	LOC_Os04g44820	zinc finger
TraesCS6B02G264500	black	Seedling	AT4G27470	RMA3	E3 ubiquitin-protein ligase RMA3	LOC_Os04g44820	zinc finger
TraesCS7A02G060700	black	Seedling	AT5G07270	XBAT33	E3 ubiquitin-protein ligase XBAT33	LOC_Os06g03800	pollen ankyrin
TraesCS7A02G182500	black	Seedling	AT4G08550		electron carriers%3Bprotein disulfide oxidoreductases	LOC_Os06g12030	glutaredoxin domain containing protein
TraesCS6D02G393200	black	Seedling	AT5G43430	ETFB	Electron transfer flavoprotein subunit beta%2C mitochondrial	LOC_Os04g10400	electron transfer flavoprotein subunit beta
TraesCS3A02G129600	black	Seedling	AT2G41475		Embryo-specific protein 3%2C (ATS3)	LOC_Os01g07780	embryo-specific 3
TraesCS3D02G036900	black	Seedling	AT1G68290	ENDO2	Endonuclease 2	LOC_Os01g03730	nuclease PA3
TraesCS2B02G535400	black	Seedling	AT4G21585	ENDO4	Endonuclease 4	LOC_Os04g55850	nuclease PA3
TraesCS2A02G507500	black	Shared	AT4G21585	ENDO4	Endonuclease 4	LOC_Os04g55850	nuclease PA3
TraesCS2D02G507900	black	Seedling	AT4G21585	ENDO4	Endonuclease 4	LOC_Os04g55850	nuclease PA3
TraesCS5A02G144300	black	Seedling	AT2G38670	PECT1	Ethanolamine-phosphate cytidylyltransferase	LOC_Os12g02820	cytidylyltransferase domain containing protein
TraesCS4B02G299600	black	Seedling	AT1G72360	ERF073	Ethylene-responsive transcription factor ERF073	LOC_Os03g08500	AP2 domain containing protein
TraesCS2D02G286300	black	Shared	AT5G13330	ERF113	Ethylene-responsive transcription factor ERF113	LOC_Os04g32620	ethylene-responsive transcription factor ERF114
TraesCS2A02G288000	black	Seedling	AT5G13330	ERF113	Ethylene-responsive transcription factor ERF113	LOC_Os04g32620	ethylene-responsive transcription factor ERF114
TraesCS2B02G304800	black	Seedling	AT5G13330	ERF113	Ethylene-responsive transcription factor ERF113	LOC_Os04g32620	ethylene-responsive transcription factor ERF114
TraesCS7B02G162100	black	Seedling	AT5G61890	ERF114	Ethylene-responsive transcription factor ERF114	LOC_Os08g42550	AP2 domain containing protein
TraesCS5B02G214400	black	Seedling	AT1G53910	RAP2-12	Ethylene-responsive transcription factor RAP2-12	LOC_Os09g26420	AP2 domain containing protein
TraesCS7B02G115900	black	No DEG	AT1G49050		Eukaryotic aspartyl protease family protein	LOC_Os06g15760	eukaryotic aspartyl protease domain containing protein
TraesCS6D02G264000	black	Seedling	AT5G10770		Eukaryotic aspartyl protease family protein	LOC_Os02g48870	aspartic proteinase nepenthesin-2 precursor
TraesCS4B02G102000	black	Seedling	AT2G03200		Eukaryotic aspartyl protease family protein	LOC_Os12g26470	aspartic proteinase nepenthesin-1 precursor
TraesCS3D02G039300	black	Shared	AT1G03220		Eukaryotic aspartyl protease family protein	LOC_Os01g71080	xylanase inhibitor
TraesCS3A02G040800	black	Shared	AT1G03230		Eukaryotic aspartyl protease family protein	LOC_Os01g71080	xylanase inhibitor
TraesCS6B02G312200	black	Seedling	AT5G10770		Eukaryotic aspartyl protease family protein	LOC_Os02g48870	aspartic proteinase nepenthesin-2 precursor
TraesCS7D02G516100	black	Seedling	AT3G59080		Eukaryotic aspartyl protease family protein	LOC_Os02g21040	aspartic proteinase nepenthesin precursor
TraesCS6D02G105000	black	Seedling	AT3G13920	TIF4A-1	Eukaryotic initiation factor 4A-1	LOC_Os06g48750	DEAD-box ATP-dependent RNA helicase
TraesCS1A02G438600	black	Seedling	AT1G76810		eukaryotic translation initiation factor 2 (eIF-2) family protein	LOC_Os05g51500	eukaryotic translation initiation factor 5B
TraesCS1B02G472500	black	Seedling	AT1G76820		eukaryotic translation initiation factor 2 (eIF-2) family protein	LOC_Os05g51500	eukaryotic translation initiation factor 5B
TraesCS4A02G134000	black	Seedling	AT5G20920	EMB1401	Eukaryotic translation initiation factor 2 subunit beta	LOC_Os03g21550	eukaryotic translation initiation factor 2 subunit beta
TraesCS4B02G170900	black	Seedling	AT5G20920	EMB1401	Eukaryotic translation initiation factor 2 subunit beta	LOC_Os03g21550	eukaryotic translation initiation factor 2 subunit beta
TraesCS3A02G191100	black	Seedling	AT3G55620	EIF6-2	Eukaryotic translation initiation factor 6-2	LOC_Os01g17330	eukaryotic translation initiation factor 6
TraesCS2A02G276000	black	Shared	AT5G59730	ATEXO70H7	exocyst subunit exo70 family protein H7	LOC_Os12g01040	exo70 exocyst complex subunit domain containing protein
TraesCS2B02G293700	black	Shared	AT5G59730	ATEXO70H7	exocyst subunit exo70 family protein H7	LOC_Os11g01050	exo70 exocyst complex subunit domain containing protein
TraesCS1A02G203200	black	Seedling	AT3G45970	EXLA1	Expansin-like A1	LOC_Os10g39640	expansin precursor
TraesCS7A02G448800	black	Seedling	AT4G05020	NDB2	External alternative NAD(P)H-ubiquinone oxidoreductase B2%2C mitochondrial	LOC_Os06g47000	external NADH-ubiquinone oxidoreductase 1
TraesCS7B02G202900	black	Seedling	AT1G15910	FDM1	Factor of DNA methylation 1	LOC_Os02g19130	transcription factor X1
TraesCS7A02G354000	black	Seedling	AT4G20860		FAD-binding Berberine family protein	LOC_Os06g35650	reticuline oxidase-like protein precursor
TraesCS7B02G273600	black	Shared	AT5G44410		FAD-binding Berberine family protein	LOC_Os06g35650	reticuline oxidase-like protein precursor
TraesCS5A02G261400	black	Seedling	AT4G20820		FAD-binding Berberine family protein	LOC_Os06g35700	reticuline oxidase-like protein precursor
TraesCS7D02G368700	black	Shared	AT5G44410		FAD-binding Berberine family protein	LOC_Os06g35650	reticuline oxidase-like protein precursor
TraesCS1A02G424100	black	Seedling	AT4G20820		FAD-binding Berberine family protein	LOC_Os06g35550	retrotransposon protein
TraesCS1D02G433600	black	Seedling	AT5G44390		FAD-binding Berberine family protein	LOC_Os06g35550	retrotransposon protein
TraesCS5D02G236600	black	Seedling	AT1G55230		Family of unknown function (DUF716)	LOC_Os09g27260	plant viral response family protein
TraesCS2A02G041300	black	Seedling	AT5G64440	FAAH	Fatty acid amide hydrolase	LOC_Os04g01250	amidase family protein
TraesCS7A02G188000	black	Seedling	AT1G55000		F-box protein At1g55000	LOC_Os03g49250	OsFBO16 - F-box and other domain containing protein
TraesCS6D02G381800	black	Seedling	AT1G80960		F-box protein At1g80960	LOC_Os02g55050	OsFBX64 - F-box domain containing protein
TraesCS4B02G355800	black	Seedling	AT4G00755		F-box protein At4g00755	LOC_Os03g02560	cyclin-like F-box
TraesCS3A02G390000	black	Shared	AT5G07610		F-box protein At5g07610	LOC_Os01g65510	OsFBX31 - F-box domain containing protein
TraesCS3D02G379700	black	Seedling	AT5G07610		F-box protein At5g07610	LOC_Os01g65510	OsFBX31 - F-box domain containing protein
TraesCS5A02G525700	black	No DEG	AT3G61060	PP2A13	F-box protein PP2-A13	LOC_Os03g02550	OsFBX76 - F-box domain containing protein
TraesCS2B02G332200	black	Shared	AT4G05460	SKIP19	F-box protein SKIP19	LOC_Os08g09450	OsFBL41 - F-box domain and LRR containing protein
TraesCS3B02G440600	black	Seedling	AT1G21410	SKP2A	F-box protein SKP2A	LOC_Os01g65920	F-box/LRR-repeat protein 2
TraesCS5B02G285600	black	Germination	AT1G13570		F-box/FBD/LRR-repeat protein At1g13570	LOC_Os09g32580	expressed protein
TraesCS7D02G290000	black	Germination	AT1G51550		F-box/kelch-repeat protein At1g51550	LOC_Os08g13360	kelch repeat protein
TraesCS1D02G136700	black	Seedling	AT1G55270		F-box/kelch-repeat protein At1g55270	LOC_Os10g26990	OsFBK23 - F-box domain and kelch repeat containing protein
TraesCS6B02G334300	black	Shared	AT1G74510		F-box/kelch-repeat protein At1g74510	LOC_Os02g51350	OsFBK10 - F-box domain and kelch repeat containing protein
TraesCS6A02G306000	black	Seedling	AT1G74510		F-box/kelch-repeat protein At1g74510	LOC_Os02g51350	OsFBK10 - F-box domain and kelch repeat containing protein
TraesCS6D02G285100	black	Seedling	AT1G74510		F-box/kelch-repeat protein At1g74510	LOC_Os02g51350	OsFBK10 - F-box domain and kelch repeat containing protein
TraesCS4B02G331300	black	Seedling	AT2G17020	FBL10	F-box/LRR-repeat protein 10	LOC_Os03g04270	OsFBL10 - F-box domain and LRR containing protein
TraesCS6A02G407000	black	No DEG	AT3G26922		F-box/LRR-repeat protein At3g26922	LOC_Os02g55050	OsFBX64 - F-box domain containing protein
TraesCS7B02G235900	black	Seedling	AT3G59200		F-box/LRR-repeat protein At3g59200	LOC_Os10g03870	OsFBX353 - F-box domain containing protein
TraesCS2D02G393700	black	Seedling	AT1G01580	FRO2	Ferric reduction oxidase 2	LOC_Os04g48930	ferric-chelate reductase
TraesCS5B02G206000	black	Shared	AT5G07990	CYP75B1	Flavonoid 3'-monooxygenase	LOC_Os09g26940	cytochrome P450
TraesCS7D02G150000	black	Shared	AT5G07740	FH20	Formin-like protein 20	LOC_Os06g08540	formin-like protein 13
TraesCS2B02G135100	black	Shared	AT5G07740	FH20	Formin-like protein 20	LOC_Os07g47400	SRC2 protein
TraesCS3A02G315500	black	Seedling	AT4G03240	FH	Frataxin%2C mitochondrial	LOC_Os01g57460	frataxin
TraesCS7A02G163400	black	Seedling	AT2G06005	FIP1	FRIGIDA interacting protein 1	LOC_Os02g53780	expressed protein
TraesCS5D02G442300	black	No DEG	AT3G22440	FRL4A	FRIGIDA-like protein 4a	LOC_Os03g58070	frigida
TraesCS6B02G185500	black	Shared	AT1G16290		FUNCTIONS IN: molecular_function unknown%3B INVOLVED IN: biological_process unknown%3B LOCATED IN: chloroplast%2C vacuole%3B EXPRESSED IN: 19 plant structures%3B EXPRESSED DURING: 11 growth stages%3B CONTAINS InterPro DOMAIN/s: Lytic transglycosylase-like%2C cata /.../(InterPro:IPR008258)%3B Has 171 Blast hits to 155 proteins in 40 species: Archae - 0%3B Bacteria - 54%3B Metazoa - 0%3B Fungi - 0%…	LOC_Os02g07480	transglycosylase SLT domain containing protein
TraesCS5D02G303500	black	Seedling	AT5G47870		FUNCTIONS IN: molecular_function unknown%3B INVOLVED IN: biological_process unknown%3B LOCATED IN: chloroplast%3B EXPRESSED IN: 22 plant structures%3B EXPRESSED DURING: 13 growth stages%3B BEST Arabidopsis thaliana protein match is: cobalt ion binding (TAIR:A /.../10.1)%3B Has 1807 Blast hits to 1807 proteins in 277 species: Archae - 0%3B Bacteria - 0%3B Metazoa - 736%3B Fungi - 347%3B Plants - 3…	LOC_Os09g33790	snRK1-interacting protein 1
TraesCS2B02G243600	black	Seedling	AT3G01160		FUNCTIONS IN: molecular_function unknown%3B INVOLVED IN: biological_process unknown%3B LOCATED IN: cytosol%2C nucleus%3B EXPRESSED IN: 22 plant structures%3B EXPRESSED DURING: 13 growth stages%3B CONTAINS InterPro DOMAIN/s: NUC153 (InterPro:IPR012580)%3B Has 3663 /.../t hits to 21323 proteins in 1057 species: Archae - 109%3B Bacteria - 2369%3B Metazoa - 13796%3B Fungi - 4858%3B Plants - 1657%3B V…	LOC_Os07g34740	NUC153 domain containing protein
TraesCS5D02G277600	black	Seedling	AT1G20970		FUNCTIONS IN: molecular_function unknown%3B INVOLVED IN: biological_process unknown%3B LOCATED IN: plasma membrane%2C vacuole%3B EXPRESSED IN: guard cell%2C cultured cell%3B BEST Arabidopsis thaliana protein match is: proton pump interactor 1 (TAIR:AT4G27500.1) /.../30201 Blast hits to 17322 proteins in 780 species: Archae - 12%3B Bacteria - 1396%3B Metazoa - 17338%3B Fungi - 3422%3B Plants - 503…	LOC_Os08g40250	expressed protein
TraesCS5B02G270000	black	Seedling	AT1G20970		FUNCTIONS IN: molecular_function unknown%3B INVOLVED IN: biological_process unknown%3B LOCATED IN: plasma membrane%2C vacuole%3B EXPRESSED IN: guard cell%2C cultured cell%3B BEST Arabidopsis thaliana protein match is: proton pump interactor 1 (TAIR:AT4G27500.1) /.../30201 Blast hits to 17322 proteins in 780 species: Archae - 12%3B Bacteria - 1396%3B Metazoa - 17338%3B Fungi - 3422%3B Plants - 503…	LOC_Os08g40250	expressed protein
TraesCS3D02G363200	black	Seedling	AT1G08230	GAT1	GABA transporter 1	LOC_Os01g63854	transmembrane amino acid transporter protein
TraesCS7B02G253600	black	Seedling	AT3G22200	POP2	Gamma-aminobutyrate transaminase POP2%2C mitochondrial	LOC_Os04g52450	aminotransferase
TraesCS3B02G090400	black	Shared	AT4G29210	GGT3	Gamma-glutamyltranspeptidase 3	LOC_Os01g05810	gamma-glutamyltranspeptidase 1 precursor
TraesCS2D02G461500	black	Seedling	AT4G20410	GSNAP	Gamma-soluble NSF attachment protein	LOC_Os04g52760	gamma-soluble NSF attachment protein
TraesCS5D02G027700	black	Seedling	AT3G60530	GATA4	GATA transcription factor 4	LOC_Os12g42970	GATA zinc finger domain containing protein
TraesCS3A02G378700	black	Seedling	AT1G03970	GBF4	G-box-binding factor 4	LOC_Os01g64730	bZIP transcription factor domain containing protein
TraesCS3D02G371900	black	Shared	AT1G03970	GBF4	G-box-binding factor 4	LOC_Os01g64730	bZIP transcription factor domain containing protein
TraesCS4A02G201200	black	Seedling	AT5G55120	VTC5	GDP-L-galactose phosphorylase 2	LOC_Os12g08810	VTC2
TraesCS7B02G270000	black	Shared	AT1G29670		GDSL esterase/lipase At1g29670	LOC_Os06g36520	GDSL-like lipase/acylhydrolase
TraesCS3A02G025400	black	Shared	AT3G26430		GDSL esterase/lipase At3g26430	LOC_Os07g39740	GDSL-like lipase/acylhydrolase
TraesCS3A02G025300	black	Shared	AT3G26430		GDSL esterase/lipase At3g26430	LOC_Os07g39740	GDSL-like lipase/acylhydrolase
TraesCS3D02G020700	black	Seedling	AT3G26430		GDSL esterase/lipase At3g26430	LOC_Os07g39740	GDSL-like lipase/acylhydrolase
TraesCS2D02G195400	black	Seedling	AT3G26430		GDSL esterase/lipase At3g26430	LOC_Os07g39750	GDSL-like lipase/acylhydrolase
TraesCS4B02G006600	black	Shared	AT5G03610		GDSL esterase/lipase At5g03610	LOC_Os09g39430	GDSL-like lipase/acylhydrolase
TraesCS3D02G258000	black	Shared	AT5G45910		GDSL esterase/lipase At5g45910	LOC_Os02g15230	GDSL-like lipase/acylhydrolase
TraesCSU02G137500	black	Seedling	AT5G20630	GER3	Germin-like protein subfamily 3 member 3	LOC_Os04g22080	retrotransposon protein
TraesCS3B02G328700	black	Seedling	AT1G78440	GA2OX1	Gibberellin 2-beta-dioxygenase 1	LOC_Os01g55240	gibberellin 2-beta-dioxygenase
TraesCS4B02G251100	black	Seedling	AT2G01630		Glucan endo-1%2C3-beta-glucosidase 3	LOC_Os03g25790	glycosyl hydrolases family 17 protein
TraesCS3D02G475000	black	Seedling	AT3G57260	BG2	Glucan endo-1%2C3-beta-glucosidase%2C acidic isoform	LOC_Os01g71350	glycosyl hydrolases family 17
TraesCS2A02G157100	black	Seedling	AT5G22740	CSLA2	Glucomannan 4-beta-mannosyltransferase 2	LOC_Os07g43710	CSLA7 - cellulose synthase-like family A; mannan synthase
TraesCS7A02G287500	black	Seedling	AT1G61800	GPT2	Glucose-6-phosphate/phosphate translocator 2%2C chloroplastic	LOC_Os08g08840	phosphate/phosphate translocator
TraesCS4B02G052300	black	Shared	AT1G65960	GAD2	Glutamate decarboxylase 2	LOC_Os08g36320	decarboxylase
TraesCS5B02G217200	black	Seedling	AT2G29120	GLR2.7	Glutamate receptor 2.7	LOC_Os09g26160	glutamate receptor
TraesCS6A02G347900	black	Germination	AT2G29110	GLR2.8	Glutamate receptor 2.8	LOC_Os02g54640	glutamate receptor
TraesCS7A02G153100	black	Seedling	AT2G29110	GLR2.8	Glutamate receptor 2.8	LOC_Os06g08900	glutamate receptor 2.6 precursor
TraesCS3B02G299800	black	Seedling	AT5G53460	GLT1	Glutamate synthase 1	LOC_Os01g48960	glutamate synthase
TraesCS1B02G090500	black	Seedling	AT4G23100	GSH1	Glutamate--cysteine ligase%2C chloroplastic	LOC_Os07g27790	glutamate--cysteine ligase
TraesCS1A02G078800	black	Seedling	AT3G62760	GSTF13	Glutathione S-transferase F13	LOC_Os01g27360	glutathione S-transferase
TraesCS5B02G435000	black	Shared	AT3G62760	GSTF13	Glutathione S-transferase F13	LOC_Os01g27480	glutathione S-transferase
TraesCS2A02G045400	black	Shared	AT3G62760	GSTF13	Glutathione S-transferase F13	LOC_Os01g27360	glutathione S-transferase
TraesCS3A02G309100	black	Seedling	AT3G62760	GSTF13	Glutathione S-transferase F13	LOC_Os01g27260	glutathione S-transferase
TraesCS2D02G063100	black	Seedling	AT5G42150		Glutathione S-transferase family protein	LOC_Os04g17050	glutaredoxin family protein
TraesCS1A02G187000	black	Seedling	AT1G10370	GSTU17	Glutathione S-transferase U17	LOC_Os10g38140	glutathione S-transferase
TraesCS5D02G148500	black	Seedling	AT1G10370	GSTU17	Glutathione S-transferase U17	LOC_Os09g29200	glutathione S-transferase
TraesCS1B02G194600	black	No DEG	AT1G10370	GSTU17	Glutathione S-transferase U17	LOC_Os10g38489	glutathione S-transferase GSTU6
TraesCS3A02G260800	black	Shared	AT1G10360	GSTU18	Glutathione S-transferase U18	LOC_Os01g49710	glutathione S-transferase
TraesCS1D02G189700	black	Shared	AT1G10360	GSTU18	Glutathione S-transferase U18	LOC_Os10g38470	glutathione S-transferase
TraesCS7D02G030800	black	Germination	AT1G10360	GSTU18	Glutathione S-transferase U18	LOC_Os10g38720	glutathione S-transferase
TraesCS7D02G078700	black	Seedling	AT3G09270	GSTU8	Glutathione S-transferase U8	LOC_Os01g72150	glutathione S-transferase
TraesCS7A02G083700	black	Shared	AT3G09270	GSTU8	Glutathione S-transferase U8	LOC_Os01g72150	glutathione S-transferase
TraesCS6D02G146900	black	Seedling	AT1G79530	GAPCP1	Glyceraldehyde-3-phosphate dehydrogenase GAPCP1%2C chloroplastic	LOC_Os02g07490	glyceraldehyde-3-phosphate dehydrogenase
TraesCS5B02G141000	black	Seedling	AT5G21060		Glyceraldehyde-3-phosphate dehydrogenase-like family protein	LOC_Os11g03470	bifunctional aspartokinase/homoserine dehydrogenase
TraesCS6D02G043000	black	Shared	AT2G38110	GPAT6	Glycerol-3-phosphate 2-O-acyltransferase 6	LOC_Os02g02340	glycerol-3-phosphate acyltransferase
TraesCS7D02G242500	black	Seedling	AT5G55480	GDPDL4	Glycerophosphodiester phosphodiesterase GDPDL4	LOC_Os08g39350	glycerophosphoryl diester phosphodiesterase family protein
TraesCS2B02G275500	black	Seedling	AT4G21620		glycine-rich protein	LOC_Os07g03180	GCRP3 - Glycine and cysteine rich family protein precursor
TraesCS2A02G266900	black	Seedling	AT4G21620		glycine-rich protein	LOC_Os07g03180	GCRP3 - Glycine and cysteine rich family protein precursor
TraesCS2D02G257100	black	Shared	AT4G21620		glycine-rich protein	LOC_Os07g03180	GCRP3 - Glycine and cysteine rich family protein precursor
TraesCS5B02G470700	black	Seedling	AT5G61030	RBG3	Glycine-rich RNA-binding protein 3%2C mitochondrial	LOC_Os10g17454	RNA recognition motif containing protein
TraesCS4A02G355700	black	Seedling	AT3G26420	RZ1A	Glycine-rich RNA-binding protein RZ1A	LOC_Os03g61990	glycine-rich RNA-binding protein 7
TraesCS2B02G304900	black	Seedling	AT1G29880	GLYRS-1	Glycine--tRNA ligase 1%2C mitochondrial	LOC_Os04g32650	tRNA synthetase class II core domain containing protein
TraesCS2B02G144300	black	Seedling	AT1G10050		glycosyl hydrolase family 10 protein / carbohydrate-binding domain-containing protein	LOC_Os07g27320	glycosyl hydrolase family 10 protein
TraesCS5A02G199400	black	Seedling	AT5G15870		glycosyl hydrolase family 81 protein	LOC_Os09g21210	beta-glucan-binding protein 4
TraesCS5D02G399000	black	Seedling	AT3G47010		Glycosyl hydrolase family protein	LOC_Os01g56510	periplasmic beta-glucosidase precursor
TraesCS3D02G481400	black	Seedling	AT4G16260		Glycosyl hydrolase superfamily protein	LOC_Os01g71380	glycosyl hydrolases family 17
TraesCS7A02G378100	black	Seedling	AT2G26600		Glycosyl hydrolase superfamily protein	LOC_Os06g40490	glycosyl hydrolases family 17
TraesCS3A02G486000	black	Shared	AT4G16260		Glycosyl hydrolase superfamily protein	LOC_Os01g71380	glycosyl hydrolases family 17
TraesCS7B02G364700	black	Seedling	AT5G11720		Glycosyl hydrolases family 31 protein	LOC_Os06g46284	glycosyl hydrolase
TraesCS3D02G023100	black	Shared	AT3G18170		Glycosyltransferase family 61 protein	LOC_Os01g02930	glycosyltransferase protein
TraesCS7A02G236200	black	Shared	AT3G18170		Glycosyltransferase family 61 protein	LOC_Os06g28124	glycosyltransferase
TraesCS2A02G176200	black	Seedling	AT1G63110		GPI transamidase subunit PIG-U	LOC_Os02g46350	GPI transamidase subunit PIG-U domain containing protein
TraesCS6D02G375900	black	Seedling	AT1G11330		G-type lectin S-receptor-like serine/threonine-protein kinase At1g11330	LOC_Os04g53994	kinase
TraesCS7A02G455800	black	Shared	AT2G19130		G-type lectin S-receptor-like serine/threonine-protein kinase At2g19130	LOC_Os07g36780	S-domain receptor-like protein kinase
TraesCS3B02G076900	black	No DEG	AT4G32300	SD25	G-type lectin S-receptor-like serine/threonine-protein kinase SD2-5	LOC_Os01g02310	expressed protein
TraesCS5B02G444000	black	Seedling	AT2G38840		Guanylate-binding family protein	LOC_Os03g58240	GTP binding protein
TraesCS5D02G447400	black	Seedling	AT2G38840		Guanylate-binding family protein	LOC_Os03g58240	GTP binding protein
TraesCS5A02G440300	black	Seedling	AT2G38840		Guanylate-binding family protein	LOC_Os03g58240	GTP binding protein
TraesCS4B02G038800	black	Seedling	AT2G32150		Haloacid dehalogenase-like hydrolase (HAD) superfamily protein	LOC_Os03g49440	phosphatase
TraesCS4B02G207900	black	Shared	AT5G02230		Haloacid dehalogenase-like hydrolase (HAD) superfamily protein	LOC_Os03g16670	haloacid dehalogenase-like hydrolase family protein
TraesCS5B02G267900	black	Seedling	AT4G37910	HSP70-9	Heat shock 70 kDa protein 9%2C mitochondrial	LOC_Os09g31486	DnaK family protein
TraesCS5A02G268100	black	Seedling	AT4G37910	HSP70-9	Heat shock 70 kDa protein 9%2C mitochondrial	LOC_Os09g31486	DnaK family protein
TraesCS1A02G350400	black	Shared	AT4G18880	HSFA4A	Heat stress transcription factor A-4a	LOC_Os05g45410	HSF-type DNA-binding domain containing protein
TraesCS5A02G548700	black	Seedling	AT3G24520	HSFC1	Heat stress transcription factor C-1	LOC_Os02g13800	HSF-type DNA-binding domain containing protein
TraesCS2A02G539500	black	Seedling	AT1G01490		Heavy metal transport/detoxification superfamily protein	LOC_Os04g57200	heavy metal transport/detoxification protein
TraesCS3A02G526400	black	Shared	AT5G02600	NAKR1	Heavy metal transport/detoxification superfamily protein	LOC_Os01g74490	heavy metal-associated domain containing protein
TraesCS2D02G540000	black	Seedling	AT1G01490		Heavy metal transport/detoxification superfamily protein	LOC_Os04g57200	heavy metal transport/detoxification protein
TraesCS3D02G531500	black	Shared	AT5G02600	NAKR1	Heavy metal transport/detoxification superfamily protein	LOC_Os01g74490	heavy metal-associated domain containing protein
TraesCS2A02G517600	black	Seedling	AT4G16380		Heavy metal transport/detoxification superfamily protein	LOC_Os07g41600	proline-rich protein
TraesCS2D02G540300	black	Shared	AT1G01490		Heavy metal transport/detoxification superfamily protein	LOC_Os04g57200	heavy metal transport/detoxification protein
TraesCS2D02G540400	black	Shared	AT1G01490		Heavy metal transport/detoxification superfamily protein	LOC_Os04g57200	heavy metal transport/detoxification protein
TraesCS2D02G540500	black	No DEG	AT1G01490		Heavy metal transport/detoxification superfamily protein	LOC_Os04g57200	heavy metal transport/detoxification protein
TraesCS3B02G489000	black	Shared	AT5G27690		Heavy metal transport/detoxification superfamily protein	LOC_Os01g70710	heavy metal-associated domain containing protein
TraesCS3B02G593700	black	Shared	AT5G02600	NAKR1	Heavy metal transport/detoxification superfamily protein	LOC_Os01g74490	heavy metal-associated domain containing protein
TraesCS2B02G546100	black	Germination	AT4G16380		Heavy metal transport/detoxification superfamily protein	LOC_Os03g54050	anther-specific proline-rich protein APG precursor
TraesCS2B02G569600	black	Shared	AT1G01490		Heavy metal transport/detoxification superfamily protein	LOC_Os04g57200	heavy metal transport/detoxification protein
TraesCS6D02G090500	black	Seedling	AT4G36810	GGPPS1	Heterodimeric geranylgeranyl pyrophosphate synthase large subunit 1%2C chloroplastic	LOC_Os01g14630	polyprenyl synthetase
TraesCS2B02G581900	black	Shared	AT3G04720	HEL	Hevein-like preproprotein	LOC_Os11g37950	WIP3 - Wound-induced protein precursor
TraesCS2B02G582000	black	Germination	AT3G04720	HEL	Hevein-like preproprotein	LOC_Os11g37950	WIP3 - Wound-induced protein precursor
TraesCS3B02G584700	black	Seedling	AT3G04720	HEL	Hevein-like preproprotein	LOC_Os11g37950	WIP3 - Wound-induced protein precursor
TraesCS4D02G271200	black	Seedling	AT4G35080		high-affinity nickel-transport family protein	LOC_Os03g06090	high-affinity nickel-transport family protein
TraesCS4B02G272000	black	Seedling	AT4G35080		high-affinity nickel-transport family protein	LOC_Os03g06090	high-affinity nickel-transport family protein
TraesCS4B02G050200	black	Seedling	AT2G01830	AHK4	Histidine kinase 4	LOC_Os03g50860	histidine kinase
TraesCS4A02G264800	black	Seedling	AT2G01830	AHK4	Histidine kinase 4	LOC_Os03g50860	histidine kinase
TraesCS4D02G205300	black	Seedling	AT5G22880	H2B	Histone H2B.10	LOC_Os08g38300	Core histone H2A/H2B/H3/H4 domain containing protein
TraesCS5B02G349100	black	Shared	AT1G07660		Histone H4	LOC_Os05g39050	Core histone H2A/H2B/H3/H4 domain containing protein
TraesCS7A02G133300	black	Shared	AT2G23840		HNH endonuclease	LOC_Os07g07480	HNH endonuclease domain-containing protein
TraesCS1A02G157500	black	Seedling	AT5G60690	REV	Homeobox-leucine zipper protein REVOLUTA	LOC_Os10g33960	START domain containing protein
TraesCS3D02G111100	black	Seedling	AT3G16350		Homeodomain-like superfamily protein	LOC_Os01g09280	myb-related transcription activator
TraesCS3B02G246000	black	No DEG	AT3G16350		Homeodomain-like superfamily protein	LOC_Os01g41900	Myb transcription factor
TraesCS3A02G375500	black	Shared	AT5G58900		Homeodomain-like transcriptional regulator	LOC_Os01g64360	MYB family transcription factor
TraesCS6A02G216100	black	Shared	AT3G54420	ATEP3	homolog of carrot EP3-3 chitinase	LOC_Os02g39330	CHIT1 - Chitinase family protein precursor
TraesCS6D02G199500	black	Seedling	AT3G54420	ATEP3	homolog of carrot EP3-3 chitinase	LOC_Os02g39330	CHIT1 - Chitinase family protein precursor
TraesCS6B02G246800	black	Shared	AT3G54420	ATEP3	homolog of carrot EP3-3 chitinase	LOC_Os02g39330	CHIT1 - Chitinase family protein precursor
TraesCS7A02G185500	black	Seedling	AT1G74520	HVA22A	HVA22-like protein a	LOC_Os06g12220	HVA22
TraesCS7B02G090700	black	No DEG	AT1G74520	HVA22A	HVA22-like protein a	LOC_Os06g12220	HVA22
TraesCS5D02G074300	black	Seedling	AT5G50720	HVA22E	HVA22-like protein e	LOC_Os11g30500	HVA22
TraesCS7D02G531500	black	Seedling	AT5G42830		HXXXD-type acyl-transferase family protein	LOC_Os06g01350	transferase family protein
TraesCS5A02G269300	black	Seedling	AT1G76490	HMG1	hydroxy methylglutaryl CoA reductase 1	LOC_Os09g31970	3-hydroxy-3-methylglutaryl-coenzyme A reductase
TraesCS4B02G229600	black	No DEG	AT1G14710		hydroxyproline-rich glycoprotein family protein	LOC_Os03g13560	hydroxyproline-rich glycoprotein family protein
TraesCS2D02G111700	black	Seedling	AT5G27760		Hypoxia-responsive family protein	LOC_Os07g47670	hypoxia-responsive family protein
TraesCS2A02G111000	black	Seedling	AT5G27760		Hypoxia-responsive family protein	LOC_Os07g47670	hypoxia-responsive family protein
TraesCS5D02G184700	black	Germination	AT3G02875	ILR1	IAA-amino acid hydrolase ILR1	LOC_Os07g14590	hydrolase
TraesCS7B02G418900	black	Seedling	AT5G20960	AAO1	Indole-3-acetaldehyde oxidase	LOC_Os07g18120	aldehyde oxidase
TraesCS7B02G269900	black	Seedling	AT1G14520	MIOX1	Inositol oxygenase 1	LOC_Os06g36560	inositol oxygenase
TraesCS3B02G228900	black	No DEG	AT5G56730		Insulinase (Peptidase family M16) protein	LOC_Os01g37825	M16 domain containing zinc peptidase
TraesCS4B02G028000	black	Shared	AT5G62720		Integral membrane HPP family protein	LOC_Os03g48030	integral membrane HPP family protein
TraesCS1A02G218100	black	Shared	AT5G07580	ERF106	Integrase-type DNA-binding superfamily protein	LOC_Os10g41330	AP2 domain containing protein
TraesCS1D02G258900	black	Seedling	AT5G16440	IPP1	Isopentenyl-diphosphate Delta-isomerase I%2C chloroplastic	LOC_Os05g34180	hydrolase
TraesCS4D02G317500	black	Seedling	AT5G51710	KEA5	K(+) efflux antiporter 5	LOC_Os06g36590	transporter
TraesCS6B02G074200	black	Seedling	AT3G09220	LAC7	Laccase-7	LOC_Os10g20610	laccase-15 precursor
TraesCS1B02G381500	black	Seedling	AT1G52690		Late embryogenesis abundant protein (LEA) family protein	LOC_Os05g46480	late embryogenesis abundant protein
TraesCS3A02G388200	black	Shared	AT1G72180		Leucine-rich receptor-like protein kinase family protein	LOC_Os01g65650	receptor-like protein kinase HAIKU2 precursor
TraesCS3A02G213100	black	Shared	AT4G18670	LRX5	Leucine-rich repeat extensin-like protein 5	LOC_Os01g41120	retrotransposon protein
TraesCS6B02G251200	black	Seedling	AT1G15740		Leucine-rich repeat family protein	LOC_Os04g42470	regulatory subunit
TraesCS4D02G175200	black	Shared	AT1G79620		Leucine-rich repeat protein kinase family protein	LOC_Os11g14050	leucine-rich repeat family protein
TraesCS6A02G385000	black	Shared	AT3G47580		Leucine-rich repeat protein kinase family protein	LOC_Os11g29790	receptor kinase
TraesCS4B02G173100	black	Shared	AT1G79620		Leucine-rich repeat protein kinase family protein	LOC_Os03g21230	leucine-rich repeat family protein
TraesCS7D02G463300	black	Seedling	AT3G47090		Leucine-rich repeat protein kinase family protein	LOC_Os06g45630	expressed protein
TraesCS7D02G217500	black	Seedling	AT2G31880	SOBIR1	Leucine-rich repeat receptor-like serine/threonine/tyrosine-protein kinase SOBIR1	LOC_Os06g18000	protein kinase domain containing protein
TraesCS4B02G037800	black	Seedling	AT1G55020	LOX1	Linoleate 9S-lipoxygenase 1	LOC_Os03g49380	lipoxygenase
TraesCS3B02G270800	black	No DEG	AT1G15080	LPP2	Lipid phosphate phosphatase 2	LOC_Os01g47580	lipid phosphatase protein
TraesCS6A02G271800	black	Shared	AT5G66450	LPPE2	Lipid phosphate phosphatase epsilon 2%2C chloroplastic	LOC_Os02g47570	phosphatase
TraesCS2A02G074700	black	Shared	AT3G06850	BCE2	Lipoamide acyltransferase component of branched-chain alpha-keto acid dehydrogenase complex%2C mitochondrial	LOC_Os01g21160	2-oxo acid dehydrogenases acyltransferase domain containing protein
TraesCS2D02G073400	black	Seedling	AT3G06850	BCE2	Lipoamide acyltransferase component of branched-chain alpha-keto acid dehydrogenase complex%2C mitochondrial	LOC_Os01g21160	2-oxo acid dehydrogenases acyltransferase domain containing protein
TraesCS4A02G236200	black	No DEG	AT5G67420	LBD37	LOB domain-containing protein 37	LOC_Os03g41330	DUF260 domain containing protein
TraesCS3A02G046100	black	Shared				LOC_Os01g03380	BBTI6 - Bowman-Birk type bran trypsin inhibitor precursor
TraesCS3B02G037000	black	Shared				LOC_Os01g03380	BBTI6 - Bowman-Birk type bran trypsin inhibitor precursor
TraesCS3D02G033800	black	Seedling				LOC_Os01g03380	BBTI6 - Bowman-Birk type bran trypsin inhibitor precursor
TraesCS5D02G479400	black	Seedling				LOC_Os01g04040	BBTI11 - Bowman-Birk type bran trypsin inhibitor precursor
TraesCS1B02G276700	black	Shared				LOC_Os01g04050	BBTI12 - Bowman-Birk type bran trypsin inhibitor precursor
TraesCS1B02G276500	black	Shared				LOC_Os01g04050	BBTI12 - Bowman-Birk type bran trypsin inhibitor precursor
TraesCS1D02G265800	black	Seedling				LOC_Os01g04050	BBTI12 - Bowman-Birk type bran trypsin inhibitor precursor
TraesCS1A02G265800	black	Seedling				LOC_Os01g04050	BBTI12 - Bowman-Birk type bran trypsin inhibitor precursor
TraesCSU02G234600	black	Germination				LOC_Os01g04530	expressed protein
TraesCS1D02G402600	black	Seedling				LOC_Os01g15610	expressed protein
TraesCS5B02G546200	black	No DEG				LOC_Os01g24430	expressed protein
TraesCS3D02G320200	black	Seedling				LOC_Os01g58130	expressed protein
TraesCS3D02G320300	black	Seedling				LOC_Os01g58140	expressed protein
TraesCS5B02G373800	black	Seedling				LOC_Os01g64220	expressed protein
TraesCS3D02G397700	black	Shared				LOC_Os01g66544	expressed protein
TraesCS6B02G174000	black	Seedling				LOC_Os02g08540	expressed protein
TraesCS6D02G168900	black	Seedling				LOC_Os02g10730	expressed protein
TraesCS6B02G210400	black	Seedling				LOC_Os02g10730	expressed protein
TraesCS6A02G181500	black	Seedling				LOC_Os02g10730	expressed protein
TraesCS6B02G373200	black	Seedling				LOC_Os02g54100	expressed protein
TraesCS4A02G007800	black	Seedling				LOC_Os03g08330	ZIM domain containing protein
TraesCS4D02G296000	black	Seedling				LOC_Os03g08330	ZIM domain containing protein
TraesCS4D02G303600	black	No DEG				LOC_Os03g08970	expressed protein
TraesCS4A02G096100	black	Shared				LOC_Os03g16580	expressed protein
TraesCS4A02G121900	black	Shared				LOC_Os03g19540	expressed protein
TraesCS4B02G178500	black	Seedling				LOC_Os03g20330	VQ domain containing protein
TraesCS6B02G102700	black	Seedling				LOC_Os03g46510	OsFBX103 - F-box domain containing protein
TraesCS4B02G064400	black	Shared				LOC_Os03g52380	PIII5 - Proteinase inhibitor II family protein precursor
TraesCS3D02G456200	black	Seedling				LOC_Os04g25840	OsFBX128 - F-box domain containing protein
TraesCS2B02G541800	black	No DEG				LOC_Os04g55600	expressed protein
TraesCS1D02G039600	black	Seedling				LOC_Os05g02260	expressed protein
TraesCS6A02G036600	black	Seedling				LOC_Os05g09580	expressed protein
TraesCS6B02G051100	black	Seedling				LOC_Os05g09580	expressed protein
TraesCS5A02G052600	black	Shared				LOC_Os05g15510	cellulase
TraesCS1A02G260700	black	Germination				LOC_Os05g34500	expressed protein
TraesCS1A02G305300	black	Seedling				LOC_Os05g40890	expressed protein
TraesCS5B02G263500	black	Shared				LOC_Os05g45570	expressed protein
TraesCS1D02G367000	black	Shared				LOC_Os05g46340	expressed protein
TraesCS1D02G383700	black	Seedling				LOC_Os05g47870	expressed protein
TraesCS1D02G422000	black	Seedling				LOC_Os05g50100	expressed protein
TraesCS1A02G420100	black	No DEG				LOC_Os05g50470	expressed protein
TraesCS1D02G427900	black	Seedling				LOC_Os05g50470	expressed protein
TraesCS1D02G389200	black	Seedling				LOC_Os06g04240	expressed protein
TraesCS1B02G403900	black	Seedling				LOC_Os06g04240	expressed protein
TraesCS1D02G119300	black	Seedling				LOC_Os06g05120	expressed protein
TraesCS6B02G396800	black	Seedling				LOC_Os06g19010	cadmium tolerance factor
TraesCS6B02G398200	black	Seedling				LOC_Os06g19010	cadmium tolerance factor
TraesCS7B02G273400	black	Shared				LOC_Os06g35770	expressed protein
TraesCS7D02G373000	black	Seedling				LOC_Os06g40210	expressed protein
TraesCS7B02G302000	black	Seedling				LOC_Os06g41450	VQ domain containing protein
TraesCS7A02G401900	black	Shared				LOC_Os06g41450	VQ domain containing protein
TraesCS2D02G260200	black	Shared				LOC_Os07g02460	expressed protein
TraesCS3B02G472700	black	Germination				LOC_Os07g18570	expressed protein
TraesCS7B02G081400	black	Seedling				LOC_Os08g31090	expressed protein
TraesCS7B02G049500	black	Seedling				LOC_Os09g01000	expressed protein
TraesCSU02G262100	black	Seedling				LOC_Os09g01000	expressed protein
TraesCS3D02G066300	black	Seedling				LOC_Os09g02160	DEFL47 - Defensin and Defensin-like DEFL family
TraesCSU02G098300	black	Seedling				LOC_Os09g02690	expressed protein
TraesCS2D02G492100	black	Seedling				LOC_Os09g04310	expressed protein
TraesCS3D02G438200	black	Seedling				LOC_Os09g04430	expressed protein
TraesCS5B02G178400	black	Shared				LOC_Os09g13920	expressed protein
TraesCS5A02G180600	black	Seedling				LOC_Os09g13920	expressed protein
TraesCS4A02G440100	black	Shared				LOC_Os09g39310	expressed protein
TraesCS1B02G335300	black	Shared				LOC_Os10g04540	expressed protein
TraesCS3B02G044600	black	Shared				LOC_Os10g04540	expressed protein
TraesCS1A02G323000	black	Seedling				LOC_Os10g04540	expressed protein
TraesCS7B02G256000	black	Shared				LOC_Os10g28080	glycosyl hydrolase
TraesCS7D02G351300	black	Seedling				LOC_Os10g28080	glycosyl hydrolase
TraesCS7A02G371600	black	Shared				LOC_Os10g28080	glycosyl hydrolase
TraesCS1D02G283900	black	Seedling				LOC_Os10g28120	glycosyl hydrolase
TraesCS4A02G196500	black	No DEG				LOC_Os11g05530	expressed protein
TraesCS4A02G198900	black	Seedling				LOC_Os11g05810	expressed protein
TraesCS4A02G208400	black	Seedling				LOC_Os11g06720	abscisic stress-ripening
TraesCS4B02G101700	black	Seedling				LOC_Os11g09180	expressed protein
TraesCS4D02G099000	black	Shared				LOC_Os11g09350	expressed protein
TraesCS4A02G224300	black	Shared				LOC_Os11g11980	expressed protein
TraesCS3B02G073500	black	Shared				LOC_Os12g29740	expressed protein
TraesCS3D02G060800	black	Seedling				LOC_Os12g29740	expressed protein
TraesCS6B02G440000	black	Seedling				LOC_Os12g40080	B3 DNA binding domain containing protein
TraesCS4D02G197700	black	No DEG	AT2G38905		Low temperature and salt responsive protein family	LOC_Os03g17790	OsRCI2-5 - Putative low temperature and salt responsive protein
TraesCS4D02G197800	black	Shared	AT2G38905		Low temperature and salt responsive protein family	LOC_Os03g17790	OsRCI2-5 - Putative low temperature and salt responsive protein
TraesCS4A02G107000	black	Shared	AT2G38905		Low temperature and salt responsive protein family	LOC_Os03g17790	OsRCI2-5 - Putative low temperature and salt responsive protein
TraesCS1D02G024500	black	Shared	AT5G46330	FLS2	LRR receptor-like serine/threonine-protein kinase FLS2	LOC_Os12g42520	receptor kinase
TraesCS1D02G139700	black	Germination	AT2G37710	LECRK41	L-type lectin-domain containing receptor kinase IV.1	LOC_Os07g04010	lectin-like receptor kinase
TraesCS1D02G049000	black	Germination	AT2G37710	LECRK41	L-type lectin-domain containing receptor kinase IV.1	LOC_Os07g38820	lectin-like receptor kinase
TraesCS4A02G384600	black	No DEG	AT2G37710	LECRK41	L-type lectin-domain containing receptor kinase IV.1	LOC_Os07g04000	lectin-like receptor kinase
TraesCS5A02G463200	black	Seedling	AT2G37710	LECRK41	L-type lectin-domain containing receptor kinase IV.1	LOC_Os07g03930	lectin-like receptor kinase
TraesCS2D02G129100	black	Seedling	AT2G37710	LECRK41	L-type lectin-domain containing receptor kinase IV.1	LOC_Os07g03780	lectin-like receptor kinase
TraesCS2B02G007400	black	Shared	AT5G65600	LECRK92	L-type lectin-domain containing receptor kinase IX.2	LOC_Os04g05470	protein kinase
TraesCS7A02G312800	black	Shared	AT5G40780	LHT1	Lysine histidine transporter 1	LOC_Os08g03350	amino acid transporter
TraesCS7B02G212500	black	Shared	AT5G40780	LHT1	Lysine histidine transporter 1	LOC_Os08g03350	amino acid transporter
TraesCS7D02G309200	black	Shared	AT5G40780	LHT1	Lysine histidine transporter 1	LOC_Os08g03350	amino acid transporter
TraesCS6D02G325100	black	Seedling	AT4G33150	LKR/SDH	lysine-ketoglutarate reductase/saccharopine dehydrogenase bifunctional enzyme	LOC_Os02g54254	saccharopine dehydrogenase
TraesCS7B02G306100	black	Seedling	AT2G45670	LPEAT2	Lysophospholipid acyltransferase LPEAT2	LOC_Os06g49790	acyltransferase
TraesCS7A02G406100	black	Seedling	AT2G45670	LPEAT2	Lysophospholipid acyltransferase LPEAT2	LOC_Os06g49790	acyltransferase
TraesCS1D02G395600	black	Seedling	AT1G28380	NSL1	MACPF domain-containing protein NSL1	LOC_Os05g48360	membrane attack complex component/perforin/complement C9
TraesCS3A02G380600	black	Shared	AT3G19640	MRS2-3	Magnesium transporter MRS2-3	LOC_Os01g64890	CorA-like magnesium transporter protein
TraesCS2A02G284100	black	No DEG	AT3G01930		Major facilitator superfamily protein	LOC_Os04g31924	nodulin
TraesCS5B02G150600	black	Shared	AT5G45275		Major facilitator superfamily protein	LOC_Os11g01590	nodulin
TraesCS7A02G142400	black	Seedling	AT1G80530		Major facilitator superfamily protein	LOC_Os06g08110	nodulin
TraesCS2D02G283000	black	Germination	AT3G01930		Major facilitator superfamily protein	LOC_Os04g31924	nodulin
TraesCS7B02G043200	black	Seedling	AT1G80530		Major facilitator superfamily protein	LOC_Os06g08110	nodulin
TraesCS4D02G282300	black	Shared	AT3G60070		Major facilitator superfamily protein	LOC_Os03g07170	lactose permease-related
TraesCS1B02G363100	black	Seedling	AT3G47520	MDH	Malate dehydrogenase%2C chloroplastic	LOC_Os08g33720	lactate/malate dehydrogenase
TraesCS7B02G289400	black	Seedling	AT3G47520	MDH	Malate dehydrogenase%2C chloroplastic	LOC_Os08g33720	lactate/malate dehydrogenase
TraesCS1D02G388600	black	Seedling	AT1G15150		MATE efflux family protein	LOC_Os05g48040	MATE efflux family protein
TraesCS3B02G563100	black	Seedling	AT3G21690		MATE efflux family protein	LOC_Os03g37640	MATE efflux family protein
TraesCS4A02G066800	black	Shared	AT1G51340	MATE	MATE efflux family protein 1	LOC_Os03g11734	MATE efflux protein
TraesCS6A02G350400	black	Shared	AT3G23560	ALF5	MATE efflux family protein ALF5	LOC_Os07g31884	MATE efflux family protein
TraesCS6D02G289700	black	Seedling	AT1G24140		Matrixin family protein	LOC_Os02g50730	metalloendoproteinase 1 precursor
TraesCS4D02G358800	black	Seedling	AT1G02170	AMC1	Metacaspase-1	LOC_Os03g27120	ICE-like protease p20 domain containing protein
TraesCS1D02G158300	black	Seedling	AT1G17330		Metal-dependent phosphohydrolase	LOC_Os10g34470	HD domain containing protein 2
TraesCS5B02G190700	black	Seedling	AT3G13800		Metallo-hydrolase/oxidoreductase superfamily protein	LOC_Os09g19920	metallo-beta-lactamase family protein
TraesCS3B02G496100	black	No DEG	AT2G23620	MES1	Methylesterase 1	LOC_Os01g70860	esterase
TraesCS3A02G325300	black	Shared	AT2G23620	MES1	Methylesterase 1	LOC_Os01g57770	OsPOP4 - Putative Prolyl Oligopeptidase homologue
TraesCS3B02G495800	black	Seedling	AT2G23620	MES1	Methylesterase 1	LOC_Os01g70850	esterase
TraesCS3B02G496200	black	Seedling	AT2G23620	MES1	Methylesterase 1	LOC_Os01g70860	esterase
TraesCS2D02G449400	black	Seedling	AT2G23610	MES3	Methylesterase 3	LOC_Os01g37630	esterase
TraesCS2D02G545000	black	No DEG	AT1G49820	MTK	Methylthioribose kinase	LOC_Os04g57400	methylthioribose kinase
TraesCS2B02G574100	black	Seedling	AT1G49820	MTK	Methylthioribose kinase	LOC_Os04g57400	methylthioribose kinase
TraesCS2A02G089600	black	Seedling	AT5G01710		methyltransferases	LOC_Os07g49210	helicase conserved C-terminal domain containing protein
TraesCS4D02G041900	black	Seedling	AT1G65820		microsomal glutathione s-transferase%2C putative	LOC_Os03g50130	microsomal glutathione S-transferase 3
TraesCS5B02G236300	black	No DEG	AT5G14040	MPT3	Mitochondrial phosphate carrier protein 3%2C mitochondrial	LOC_Os04g37600	phosphate carrier protein
TraesCS3B02G493000	black	Seedling	AT5G48970		Mitochondrial substrate carrier family protein	LOC_Os01g70800	mitochondrial carrier protein
TraesCS4B02G139600	black	Seedling	AT3G54110	PUMP1	Mitochondrial uncoupling protein 1	LOC_Os11g48040	mitochondrial carrier protein
TraesCS3B02G288100	black	No DEG	AT4G26890	MAPKKK16	mitogen-activated protein kinase kinase kinase 16	LOC_Os01g50420	STE_MEKK_ste11_MAP3K.7 - STE kinases include homologs to sterile 7
TraesCS4D02G101800	black	Seedling	AT1G53570	MAP3KA	mitogen-activated protein kinase kinase kinase 3	LOC_Os11g10100	STE_MEKK_ste11_MAP3K.3 - STE kinases include homologs to sterile 7
TraesCS4B02G322700	black	Shared	AT1G11310	MLO2	MLO-like protein 2	LOC_Os03g03700	MLO domain containing protein
TraesCS4D02G319100	black	Seedling	AT1G11310	MLO2	MLO-like protein 2	LOC_Os03g03700	MLO domain containing protein
TraesCS6A02G224200	black	No DEG	AT3G23250	MYB15	myb domain protein 15	LOC_Os02g41510	MYB family transcription factor
TraesCS3A02G044700	black	Seedling	AT1G68320	MYB62	myb domain protein 62	LOC_Os01g03720	MYB family transcription factor
TraesCS4D02G142900	black	Shared	AT5G49620	MYB78	myb domain protein 78	LOC_Os11g45740	MYB family transcription factor
TraesCSU02G069000	black	Shared	AT5G49620	MYB78	myb domain protein 78	LOC_Os11g45740	MYB family transcription factor
TraesCS2D02G209600	black	Shared	AT4G21440	ATMYB102	MYB-like 102	LOC_Os07g37210	MYB family transcription factor
TraesCS6A02G108800	black	Seedling	AT3G13040		myb-like HTH transcriptional regulator family protein	LOC_Os02g04640	Myb-like DNA-binding domain containing protein
TraesCS3B02G125500	black	Shared	AT5G56840		myb-like transcription factor family protein	LOC_Os01g09640	Myb transcription factor
TraesCS1A02G305500	black	No DEG	AT5G18240	MYR1	myb-related protein 1	LOC_Os05g40960	Myb transcription factor
TraesCS5A02G444100	black	Shared	AT1G08800	MYOB1	Myosin-binding protein 1	LOC_Os03g58490	DUF593 domain containing protein
TraesCS5B02G142100	black	Seedling	AT3G15510	ATNAC2	NAC domain containing protein 2	LOC_Os11g03300	NAC domain transcription factor
TraesCS5A02G143200	black	Shared	AT3G15510	ATNAC2	NAC domain containing protein 2	LOC_Os11g03300	NAC domain transcription factor
TraesCS5D02G148800	black	Shared	AT3G15510	ATNAC2	NAC domain containing protein 2	LOC_Os11g03300	NAC domain transcription factor
TraesCS2B02G118500	black	Shared	AT5G39610	ATNAC2	NAC domain containing protein 6	LOC_Os07g48550	no apical meristem protein
TraesCS6B02G075200	black	Seedling	AT1G77450	anac032	NAC domain containing protein 32	LOC_Os07g12340	NAC domain-containing protein 67
TraesCS6A02G057400	black	Seedling	AT1G77450	anac032	NAC domain containing protein 32	LOC_Os07g12340	NAC domain-containing protein 67
TraesCS6D02G059300	black	Seedling	AT1G77450	anac032	NAC domain containing protein 32	LOC_Os07g12340	NAC domain-containing protein 67
TraesCS7D02G535300	black	Seedling	AT2G17040	anac036	NAC domain containing protein 36	LOC_Os06g51070	no apical meristem protein
TraesCS4A02G130600	black	Seedling	AT3G04060	anac046	NAC domain containing protein 46	LOC_Os03g21030	no apical meristem protein
TraesCS1A02G190100	black	Shared	AT4G17980	anac071	NAC domain containing protein 71	LOC_Os10g42130	no apical meristem protein
TraesCS2A02G101400	black	Shared	AT5G61430	NAC100	NAC domain-containing protein 100	LOC_Os07g48550	no apical meristem protein
TraesCS2B02G118400	black	Shared	AT5G61430	NAC100	NAC domain-containing protein 100	LOC_Os07g48550	no apical meristem protein
TraesCS2D02G100900	black	Seedling	AT5G61430	NAC100	NAC domain-containing protein 100	LOC_Os07g48550	no apical meristem protein
TraesCS2D02G100700	black	Seedling	AT5G61430	NAC100	NAC domain-containing protein 100	LOC_Os07g48550	no apical meristem protein
TraesCS1D02G263800	black	Shared	AT1G01720	NAC002	NAC domain-containing protein 2	LOC_Os05g34830	No apical meristem protein
TraesCS7D02G452500	black	Shared	AT1G56010	NAC021	NAC domain-containing protein 21/22	LOC_Os06g46270	no apical meristem protein
TraesCS7D02G283800	black	Seedling	AT3G10500	NAC053	NAC domain-containing protein 53	LOC_Os08g44820	no apical meristem protein
TraesCS2A02G101900	black	Seedling	AT1G61110	NAC025	NAC transcription factor 25	LOC_Os07g48450	no apical meristem protein
TraesCS2A02G102000	black	Seedling	AT1G61110	NAC025	NAC transcription factor 25	LOC_Os07g48450	no apical meristem protein
TraesCS3D02G342200	black	Seedling	AT5G58490		NAD(P)-binding Rossmann-fold superfamily protein	LOC_Os01g61230	dihydroflavonol-4-reductase
TraesCS3A02G348600	black	Shared	AT5G58490		NAD(P)-binding Rossmann-fold superfamily protein	LOC_Os01g61230	dihydroflavonol-4-reductase
TraesCS2D02G192100	black	Seedling	AT4G03140		NAD(P)-binding Rossmann-fold superfamily protein	LOC_Os07g40250	sex determination protein tasselseed-2
TraesCS7B02G260200	black	Shared	AT4G09750		NAD(P)-binding Rossmann-fold superfamily protein	LOC_Os06g39040	dehydrogenase/reductase SDR family member 12
TraesCS2A02G177200	black	Shared	AT4G27250		NAD(P)-binding Rossmann-fold superfamily protein	LOC_Os07g40986	NAD dependent epimerase/dehydratase family protein
TraesCS3B02G353000	black	No DEG	AT5G54500	FQR1	NAD(P)H dehydrogenase (quinone) FQR1	LOC_Os01g57570	NADPH-dependent FMN reductase domain containing protein
TraesCS7B02G395600	black	Seedling	ATCG01090	NDHI	NAD(P)H-quinone oxidoreductase subunit I%2C chloroplastic	LOC_Os10g21398	NADPH-dependent oxidoreductase
TraesCS2D02G000200	black	Seedling	AT1G59960		NAD(P)-linked oxidoreductase superfamily protein	LOC_Os04g08550	oxidoreductase
TraesCS2B02G023500	black	Seedling	AT1G59960		NAD(P)-linked oxidoreductase superfamily protein	LOC_Os04g08550	oxidoreductase
TraesCS6B02G106100	black	Seedling	AT2G21250		NAD(P)-linked oxidoreductase superfamily protein	LOC_Os02g03100	oxidoreductase
TraesCS3A02G285900	black	No DEG	AT5G11670	NADP-ME2	NADP-dependent malic enzyme 2	LOC_Os01g52500	NADP-dependent malic enzyme
TraesCS5A02G361100	black	Seedling	AT4G30210	ATR2	NADPH--cytochrome P450 reductase 2	LOC_Os09g38620	NADPH reductase
TraesCS2D02G506600	black	Seedling	AT4G30210	ATR2	NADPH--cytochrome P450 reductase 2	LOC_Os04g55960	NADPH reductase
TraesCS5B02G363800	black	Seedling	AT4G30210	ATR2	NADPH--cytochrome P450 reductase 2	LOC_Os09g38620	NADPH reductase
TraesCS2B02G534200	black	Seedling	AT4G30210	ATR2	NADPH--cytochrome P450 reductase 2	LOC_Os04g55960	NADPH reductase
TraesCS2D02G561400	black	Shared	AT5G36970	NHL25	NDR1/HIN1-like 25	LOC_Os04g58090	harpin-induced protein 1 domain containing protein
TraesCS2A02G593300	black	Seedling	AT5G36970	NHL25	NDR1/HIN1-like 25	LOC_Os04g58090	harpin-induced protein 1 domain containing protein
TraesCS2B02G591000	black	Seedling	AT5G36970	NHL25	NDR1/HIN1-like 25	LOC_Os04g58090	harpin-induced protein 1 domain containing protein
TraesCS6B02G151500	black	Seedling	AT5G06320	NHL3	NDR1/HIN1-like 3	LOC_Os12g06220	harpin-induced protein 1 domain containing protein
TraesCS6D02G113500	black	Germination	AT5G06320	NHL3	NDR1/HIN1-like 3	LOC_Os12g06220	harpin-induced protein 1 domain containing protein
TraesCS7B02G116500	black	Seedling	AT1G70280		NHL domain-containing protein	LOC_Os06g15820	NHL repeat-containing protein
TraesCS4A02G354500	black	Seedling	AT2G23420	NAPRT2	Nicotinate phosphoribosyltransferase 2	LOC_Os03g62110	nicotinate phosphoribosyltransferase family domain containing protein
TraesCS4D02G266900	black	Germination	AT5G64080		Non-specific lipid-transfer protein-like protein At5g64080	LOC_Os03g09230	LTPL69 - Protease inhibitor/seed storage/LTP family protein precursor
TraesCS4D02G238600	black	Seedling	AT2G16060	AHB1	Non-symbiotic hemoglobin 1	LOC_Os03g12510	non-symbiotic hemoglobin 2
TraesCS4B02G237300	black	Seedling	AT2G16060	AHB1	Non-symbiotic hemoglobin 1	LOC_Os03g12510	non-symbiotic hemoglobin 2
TraesCS1D02G226200	black	Seedling	AT3G15970	NUP50B	Nuclear pore complex protein NUP50B	LOC_Os05g28190	ranBP1 domain containing protein
TraesCS6B02G013400	black	Seedling	AT5G45140	NRPC2	nuclear RNA polymerase C2	LOC_Os03g28960	DNA-directed RNA polymerase subunit
TraesCS2B02G199800	black	Shared	AT4G14540	NFYB3	Nuclear transcription factor Y subunit B-3	LOC_Os03g29970	histone-like transcription factor and archaeal histone
TraesCS2D02G180700	black	No DEG	AT4G14540	NFYB3	Nuclear transcription factor Y subunit B-3	LOC_Os03g29970	histone-like transcription factor and archaeal histone
TraesCS1D02G287500	black	Seedling	AT2G37060	NFYB8	Nuclear transcription factor Y subunit B-8	LOC_Os05g38820	histone-like transcription factor and archaeal histone
TraesCS3D02G523900	black	Seedling	AT5G04830		Nuclear transport factor 2 (NTF2) family protein	LOC_Os01g73500	expressed protein
TraesCS7A02G256900	black	Seedling	AT1G28960	NUDT15	Nudix hydrolase 15%2C mitochondrial	LOC_Os08g28860	hydrolase
TraesCS2B02G435900	black	Seedling	AT5G47240	NUDT8	Nudix hydrolase 8	LOC_Os04g46280	hydrolase
TraesCS1B02G288800	black	Shared	AT2G37980		O-fucosyltransferase family protein	LOC_Os05g37880	growth regulator related protein
TraesCS1D02G279000	black	Shared	AT2G37980		O-fucosyltransferase family protein	LOC_Os05g37880	growth regulator related protein
TraesCS1A02G279800	black	Seedling	AT2G37980		O-fucosyltransferase family protein	LOC_Os05g37880	growth regulator related protein
TraesCSU02G142700	black	Seedling	AT5G20870		O-Glycosyl hydrolases family 17 protein	LOC_Os03g27980	glucan endo-1
TraesCS5D02G001100	black	Shared	AT5G20870		O-Glycosyl hydrolases family 17 protein	LOC_Os03g27980	glucan endo-1
TraesCS7A02G053700	black	Seedling	AT5G64410	OPT4	Oligopeptide transporter 4	LOC_Os08g38400	oligopeptide transporter
TraesCS4A02G439000	black	Seedling	AT5G64410	OPT4	Oligopeptide transporter 4	LOC_Os03g54000	oligopeptide transporter
TraesCS2A02G272100	black	Seedling	AT2G26970		Oligoribonuclease	LOC_Os02g26660	exonuclease
TraesCS4D02G073600	black	Seedling	AT4G35160		O-methyltransferase family protein	LOC_Os11g19840	O-methyltransferase
TraesCSU02G253900	black	Shared	AT4G35160		O-methyltransferase family protein	LOC_Os09g17560	O-methyltransferase
TraesCS2D02G483300	black	Seedling	AT3G20660	2025-10-04	Organic cation/carnitine transporter 4	LOC_Os04g53930	organic cation transporter protein
TraesCS5B02G380600	black	Seedling	AT3G13050	2025-10-07	Organic cation/carnitine transporter 7	LOC_Os03g43720	transporter family protein
TraesCS5B02G015500	black	Seedling	AT4G11650	OSM34	Osmotin-like protein OSM34	LOC_Os12g43490	thaumatin
TraesCS5B02G016100	black	Shared	AT4G11650	OSM34	Osmotin-like protein OSM34	LOC_Os12g43490	thaumatin
TraesCS6A02G260400	black	No DEG	AT5G56550	OXS3	oxidative stress 3	LOC_Os02g45930	expressed protein
TraesCS6D02G241200	black	Seedling	AT5G56550	OXS3	oxidative stress 3	LOC_Os02g45930	expressed protein
TraesCS1D02G214100	black	Seedling	AT4G22540	ORP2A	Oxysterol-binding protein-related protein 2A	LOC_Os10g40590	oxysterol-binding protein
TraesCS1B02G224800	black	Seedling	AT4G22540	ORP2A	Oxysterol-binding protein-related protein 2A	LOC_Os10g40590	oxysterol-binding protein
TraesCS7A02G371900	black	Germination	AT1G08510	FATB	Palmitoyl-acyl carrier protein thioesterase%2C chloroplastic	LOC_Os06g39520	myristoyl-acyl carrier protein thioesterase
TraesCS4A02G136000	black	Seedling	AT3G51620		PAP/OAS1 substrate-binding domain superfamily	LOC_Os03g21850	nucleotidyltransferase
TraesCS4A02G263600	black	No DEG	AT4G12470	AZI1	pEARLI1-like lipid transfer protein 1	LOC_Os03g50960	LTPL118 - Protease inhibitor/seed storage/LTP family protein precursor
TraesCS4B02G086500	black	Germination	AT2G43880		Pectin lyase-like superfamily protein	LOC_Os11g14400	polygalacturonase
TraesCSU02G018100	black	Seedling	AT1G71210		Pentatricopeptide repeat-containing protein At1g71210	LOC_Os02g03530	PPR repeat domain containing protein
TraesCS7B02G054300	black	Shared	AT4G30700	DYW9	Pentatricopeptide repeat-containing protein At4g30700	LOC_Os06g08660	pentatricopeptide
TraesCS6B02G028900	black	Seedling	AT1G53530		Peptidase S24/S26A/S26B/S26C family protein	LOC_Os11g40500	OsSigP7 - Putative Type I Signal Peptidase homologue; employs a putative Ser/Lys catalytic dyad
TraesCS1B02G195500	black	Seedling	AT5G62150		peptidoglycan-binding LysM domain-containing protein	LOC_Os10g38040	lysM domain containing protein
TraesCS3D02G305300	black	Shared	AT4G33420	PER47	Peroxidase 47	LOC_Os07g44499	peroxidase
TraesCS3D02G305400	black	Shared	AT4G33420	PER47	Peroxidase 47	LOC_Os07g44499	peroxidase
TraesCS3D02G249200	black	No DEG	AT5G17820	PER57	Peroxidase 57	LOC_Os01g51550	peroxidase family protein
TraesCS2D02G467700	black	Seedling	AT3G14415	GLO2	Peroxisomal (S)-2-hydroxy-acid oxidase GLO2	LOC_Os04g53210	hydroxyacid oxidase 1
TraesCS2A02G467700	black	Seedling	AT3G14415	GLO2	Peroxisomal (S)-2-hydroxy-acid oxidase GLO2	LOC_Os04g53210	hydroxyacid oxidase 1
TraesCS2B02G490700	black	Seedling	AT3G14415	GLO2	Peroxisomal (S)-2-hydroxy-acid oxidase GLO2	LOC_Os04g53210	hydroxyacid oxidase 1
TraesCS3D02G077200	black	Seedling	AT4G29010	AIM1	Peroxisomal fatty acid beta-oxidation multifunctional protein AIM1	LOC_Os01g24680	3-hydroxyacyl-CoA dehydrogenase
TraesCS1A02G231100	black	Seedling	AT3G06860	MFP2	Peroxisomal fatty acid beta-oxidation multifunctional protein MFP2	LOC_Os05g29880	3-hydroxyacyl-CoA dehydrogenase
TraesCS7D02G051200	black	Seedling	AT1G01820	PEX11C	Peroxisomal membrane protein 11C	LOC_Os06g03660	peroxisomal biogenesis factor 11
TraesCS4A02G442900	black	Seedling	AT1G01820	PEX11C	Peroxisomal membrane protein 11C	LOC_Os06g03660	peroxisomal biogenesis factor 11
TraesCS6D02G212500	black	Seedling	AT2G37040	PAL1	Phenylalanine ammonia-lyase 1	LOC_Os02g41680	phenylalanine ammonia-lyase
TraesCS4B02G220200	black	Seedling	AT4G37870	PCKA	Phosphoenolpyruvate carboxykinase	LOC_Os03g15050	phosphoenolpyruvate carboxykinase
TraesCS5D02G186200	black	Seedling	AT1G53310	PPC1	Phosphoenolpyruvate carboxylase 1	LOC_Os09g14670	phosphoenolpyruvate carboxylase
TraesCS6A02G375900	black	Seedling	AT1G08650	PPCK1	Phosphoenolpyruvate carboxylase kinase 1	LOC_Os02g56310	calcium-dependent protein kinase isoform AK1
TraesCS3A02G130300	black	Germination	AT5G33320	PPT1	Phosphoenolpyruvate/phosphate translocator 1%2C chloroplastic	LOC_Os01g07730	phosphate/phosphoenolpyruvate translocator-related protein
TraesCS4D02G195400	black	Seedling	AT3G51830	SAC8	Phosphoinositide phosphatase SAC8	LOC_Os03g18080	SacI homology domain containing protein
TraesCS6D02G280500	black	Seedling	AT1G04010	PSAT	Phospholipid--sterol O-acyltransferase	LOC_Os02g56910	lecithine cholesterol acyltransferase
TraesCS7B02G438000	black	Seedling	AT1G12350	PPCS1	Phosphopantothenate--cysteine ligase 1	LOC_Os08g07880	phosphopantothenate--cysteine ligase
TraesCS7A02G178100	black	Shared	AT4G08960		phosphotyrosyl phosphatase activator (PTPA) family protein	LOC_Os06g11640	serine/threonine-protein phosphatase 2A activator 2
TraesCS1A02G040400	black	Seedling	AT3G55340	PHIP1	phragmoplastin interacting protein 1	LOC_Os05g02400	RNA recognition motif containing protein
TraesCS5A02G391300	black	Seedling	AT5G35840	PHYC	Phytochrome C	LOC_Os03g54084	phytochrome C
TraesCS5D02G401000	black	Seedling	AT5G35840	PHYC	Phytochrome C	LOC_Os03g54084	phytochrome C
TraesCS6A02G141500	black	Seedling	AT1G06570	PDS1	phytoene desaturation 1	LOC_Os02g07160	glyoxalase family protein
TraesCS2D02G085500	black	Seedling	AT1G32100	PRR1	Pinoresinol reductase 1	LOC_Os12g16410	isoflavone reductase
TraesCS5D02G270300	black	Shared	AT1G50590		Pirin-like protein At1g50590	LOC_Os09g31120	pirin
TraesCS3B02G171500	black	Seedling	AT3G61700		Plant protein 1589 of unknown function	LOC_Os01g12080	plant-specific domain TIGR01589 family protein
TraesCS6D02G184200	black	Seedling	AT3G18350		Plant protein of unknown function (DUF639)	LOC_Os10g03830	expressed protein
TraesCS5B02G381200	black	Seedling	AT4G14740		Plant protein of unknown function (DUF828) with plant pleckstrin homology-like region	LOC_Os03g43510	expressed protein
TraesCS2B02G220500	black	Seedling	AT2G44260		Plant protein of unknown function (DUF946)	LOC_Os07g38840	expressed protein
TraesCS6B02G291400	black	Shared	AT1G32700		PLATZ transcription factor family protein	LOC_Os02g46610	zinc-binding protein
TraesCS7D02G322900	black	Seedling	AT4G36945		PLC-like phosphodiesterases superfamily protein	LOC_Os08g01310	phospholipase C
TraesCS5A02G327600	black	Seedling	AT4G38690		PLC-like phosphodiesterases superfamily protein	LOC_Os09g36520	ki1 protein
TraesCS7B02G326400	black	Seedling	AT3G28580		P-loop containing nucleoside triphosphate hydrolases superfamily protein	LOC_Os06g48250	ATPase
TraesCS6B02G152100	black	Seedling	AT1G65810		P-loop containing nucleoside triphosphate hydrolases superfamily protein	LOC_Os06g47770	expressed protein
TraesCS5B02G110300	black	Seedling	AT3G27120		P-loop containing nucleoside triphosphate hydrolases superfamily protein	LOC_Os12g25720	expressed protein
TraesCS1B02G360700	black	Seedling	AT5G27950		P-loop containing nucleoside triphosphate hydrolases superfamily protein	LOC_Os11g42800	kinesin motor domain containing protein
TraesCS2D02G358000	black	Seedling	AT4G34110	PAB2	Polyadenylate-binding protein 2	LOC_Os04g42600	polyadenylate-binding protein
TraesCS5A02G161800	black	Seedling	AT1G49760	PAB8	Polyadenylate-binding protein 8	LOC_Os09g02700	polyadenylate-binding protein
TraesCS2B02G495700	black	Seedling	AT1G11650	RBP45B	Polyadenylate-binding protein RBP45B	LOC_Os04g53440	RNA recognition motif containing protein
TraesCS2B02G023900	black	Seedling	AT5G51230	EMF2	Polycomb group protein EMBRYONIC FLOWER 2	LOC_Os09g13630	ZOS9-03 - C2H2 zinc finger protein
TraesCS1A02G267900	black	Shared	AT4G22200	AKT2	Potassium channel AKT2/3	LOC_Os05g35410	potassium channel AKT2/3
TraesCS2A02G422600	black	Seedling	AT2G35060	POT11	Potassium transporter 11	LOC_Os04g52390	potassium transporter
TraesCS1D02G130300	black	Shared	AT3G13720	PRA1F3	PRA1 family protein F3	LOC_Os05g11120	prenylated rab acceptor
TraesCS3B02G373000	black	Seedling	AT3G08590		Probable 2%2C3-bisphosphoglycerate-independent phosphoglycerate mutase 2	LOC_Os01g60190	2
TraesCS3A02G341000	black	Seedling	AT3G08590		Probable 2%2C3-bisphosphoglycerate-independent phosphoglycerate mutase 2	LOC_Os01g60190	2
TraesCS7D02G312500	black	Seedling	AT3G01820		Probable adenylate kinase 7%2C mitochondrial	LOC_Os08g02540	adenylate kinase
TraesCS3B02G323900	black	Seedling	AT1G06410	TPS7	Probable alpha%2Calpha-trehalose-phosphate synthase	LOC_Os02g54820	trehalose-6-phosphate synthase
TraesCS3D02G289100	black	Seedling	AT1G06410	TPS7	Probable alpha%2Calpha-trehalose-phosphate synthase	LOC_Os02g54820	trehalose-6-phosphate synthase
TraesCS2B02G351100	black	Shared	AT5G23810	AAP7	Probable amino acid permease 7	LOC_Os04g39489	amino acid transporter
TraesCS2A02G331100	black	Seedling	AT5G23810	AAP7	Probable amino acid permease 7	LOC_Os04g39489	amino acid transporter
TraesCS7A02G241100	black	Seedling	AT4G37670	NAGS2	Probable amino-acid acetyltransferase NAGS2%2C chloroplastic	LOC_Os03g31690	GCN5-related N-acetyltransferase
TraesCS7B02G092900	black	Seedling	AT4G10380	NIP5-1	Probable aquaporin NIP5-1	LOC_Os06g12310	aquaporin protein
TraesCS2A02G407700	black	Seedling	AT4G00430	PIP1.4	Probable aquaporin PIP1-4	LOC_Os04g47220	aquaporin protein
TraesCS2B02G225900	black	Seedling	AT3G54820	PIP2-5	Probable aquaporin PIP2-5	LOC_Os07g26690	aquaporin protein
TraesCS5D02G238700	black	Seedling	AT3G29000	CML30	Probable calcium-binding protein CML30	LOC_Os09g24580	EF hand family protein
TraesCS5B02G227700	black	Shared	AT1G21550	CML44	Probable calcium-binding protein CML44	LOC_Os09g24580	EF hand family protein
TraesCS2B02G182000	black	Shared	AT5G39670	CML45	Probable calcium-binding protein CML45	LOC_Os07g43800	EF hand family protein
TraesCS3B02G424900	black	Seedling	AT3G27320	CXE11	Probable carboxylesterase 11	LOC_Os01g67600	CXE carboxylesterase
TraesCS7A02G172500	black	Seedling	AT3G48690	CXE12	Probable carboxylesterase 12	LOC_Os06g11090	CXE carboxylesterase
TraesCS7D02G173300	black	Seedling	AT3G48690	CXE12	Probable carboxylesterase 12	LOC_Os06g11090	CXE carboxylesterase
TraesCS3A02G131200	black	Seedling	AT5G06570	CXE15	Probable carboxylesterase 15	LOC_Os01g06060	gibberellin receptor GID1L2
TraesCS5D02G494400	black	Seedling	AT1G61190		Probable disease resistance protein At1g61190	LOC_Os09g10054	disease resistance protein RPS2
TraesCS3B02G557100	black	Seedling	AT5G43730		Probable disease resistance protein At5g43730	LOC_Os03g14900	NB-ARC/LRR disease resistance protein
TraesCS4A02G223500	black	Shared	AT1G58410	RXW24L	Probable disease resistance protein RXW24L	LOC_Os08g14850	resistance protein
TraesCS7A02G463900	black	Seedling	AT1G58410	RXW24L	Probable disease resistance protein RXW24L	LOC_Os08g14850	resistance protein
TraesCS3B02G197300	black	Shared	AT5G54860		Probable folate-biopterin transporter 4	LOC_Os01g14100	BT1 family protein
TraesCS2D02G338200	black	No DEG	AT3G57520	RFS2	Probable galactinol--sucrose galactosyltransferase 2	LOC_Os04g40520	uncharacterized glycosyltransferase
TraesCS7D02G236700	black	Seedling	AT5G20250	RFS6	Probable galactinol--sucrose galactosyltransferase 6	LOC_Os08g38710	uncharacterized glycosyltransferase
TraesCS7D02G133500	black	Seedling	AT5G20250	RFS6	Probable galactinol--sucrose galactosyltransferase 6	LOC_Os06g07600	uncharacterized glycosyltransferase
TraesCS4A02G066900	black	Seedling	AT5G63840	PSL5	Probable glucan 1%2C3-alpha-glucosidase	LOC_Os03g11720	glycosyl hydrolase
TraesCS3B02G371300	black	Seedling	AT4G01950	GPAT3	Probable glycerol-3-phosphate acyltransferase 3	LOC_Os11g45400	glycerol-3-phosphate acyltransferase
TraesCS4A02G057700	black	Seedling	AT1G13750	PAP1	Probable inactive purple acid phosphatase 1	LOC_Os12g38750	nucleotide pyrophosphatase/phosphodiesterase
TraesCS5D02G293700	black	Shared	AT5G50400	PAP27	Probable inactive purple acid phosphatase 27	LOC_Os12g38750	nucleotide pyrophosphatase/phosphodiesterase
TraesCS5B02G285300	black	Seedling	AT5G50400	PAP27	Probable inactive purple acid phosphatase 27	LOC_Os09g32840	nucleotide pyrophosphatase/phosphodiesterase
TraesCS4A02G267300	black	Seedling	AT1G48480	RKL1	Probable inactive receptor kinase At1g48480	LOC_Os03g50450	inactive receptor kinase At2g26730 precursor
TraesCS4D02G046900	black	Seedling	AT1G48480	RKL1	Probable inactive receptor kinase At1g48480	LOC_Os03g50450	inactive receptor kinase At2g26730 precursor
TraesCS5D02G210800	black	Shared	AT3G17840	RLK902	Probable inactive receptor kinase RLK902	LOC_Os09g23570	inactive receptor kinase At2g26730 precursor
TraesCS7D02G060000	black	No DEG	AT1G21430	YUC11	Probable indole-3-pyruvate monooxygenase YUCCA11	LOC_Os01g16714	flavin monooxygenase
TraesCS5A02G418500	black	Seedling	AT1G35710		Probable leucine-rich repeat receptor-like protein kinase At1g35710	LOC_Os02g34790	receptor-like protein kinase 5 precursor
TraesCS6A02G314300	black	Shared	AT1G35710		Probable leucine-rich repeat receptor-like protein kinase At1g35710	LOC_Os10g02990	leucine-rich repeat receptor-like protein kinase 1
TraesCS7A02G042200	black	Shared	AT1G35710		Probable leucine-rich repeat receptor-like protein kinase At1g35710	LOC_Os02g34790	receptor-like protein kinase 5 precursor
TraesCS4A02G445500	black	Shared	AT1G35710		Probable leucine-rich repeat receptor-like protein kinase At1g35710	LOC_Os02g34790	receptor-like protein kinase 5 precursor
TraesCS5D02G158100	black	Germination	AT1G35710		Probable leucine-rich repeat receptor-like protein kinase At1g35710	LOC_Os02g17710	receptor-like protein kinase 5 precursor
TraesCS7D02G037700	black	Shared	AT1G35710		Probable leucine-rich repeat receptor-like protein kinase At1g35710	LOC_Os02g34790	receptor-like protein kinase 5 precursor
TraesCS3A02G423600	black	Seedling	AT1G56140		Probable LRR receptor-like serine/threonine-protein kinase At1g56140	LOC_Os08g10330	SHR5-receptor-like kinase
TraesCS4D02G352700	black	Seedling	AT3G47570		Probable LRR receptor-like serine/threonine-protein kinase At3g47570	LOC_Os11g36150	receptor-like protein kinase 2 precursor
TraesCS4A02G330000	black	Seedling	AT3G47570		Probable LRR receptor-like serine/threonine-protein kinase At3g47570	LOC_Os08g24310	receptor-like protein kinase precursor
TraesCS7A02G366800	black	No DEG	AT3G47570		Probable LRR receptor-like serine/threonine-protein kinase At3g47570	LOC_Os11g41100	expressed protein
TraesCS3B02G074000	black	Shared	AT3G47570		Probable LRR receptor-like serine/threonine-protein kinase At3g47570	LOC_Os01g05960	receptor kinase
TraesCS5D02G158000	black	Shared	AT4G08850		Probable LRR receptor-like serine/threonine-protein kinase At4g08850	LOC_Os02g34790	receptor-like protein kinase 5 precursor
TraesCS5A02G152800	black	Shared	AT4G08850		Probable LRR receptor-like serine/threonine-protein kinase At4g08850	LOC_Os02g34790	receptor-like protein kinase 5 precursor
TraesCS7D02G134300	black	Shared	AT5G10290		Probable LRR receptor-like serine/threonine-protein kinase At5g10290	LOC_Os11g39370	BRASSINOSTEROID INSENSITIVE 1-associated receptor kinase 1 precursor
TraesCS4D02G193500	black	Seedling	AT4G18640	MRH1	Probable LRR receptor-like serine/threonine-protein kinase MRH1	LOC_Os03g18370	MRH1
TraesCS5B02G151400	black	Seedling	AT4G18640	MRH1	Probable LRR receptor-like serine/threonine-protein kinase MRH1	LOC_Os12g01510	MRH1
TraesCS2B02G104200	black	Seedling	AT4G18640	MRH1	Probable LRR receptor-like serine/threonine-protein kinase MRH1	LOC_Os07g49240	MRH1
TraesCS4D02G106700	black	Seedling	AT2G48010	RKF3	Probable LRR receptor-like serine/threonine-protein kinase RKF3	LOC_Os01g28730	protein kinase domain containing protein
TraesCS2A02G455600	black	Seedling	AT5G06740	LECRKS5	Probable L-type lectin-domain containing receptor kinase S.5	LOC_Os04g49460	protein kinase domain containing protein
TraesCS1B02G275400	black	Seedling	AT1G71900		Probable magnesium transporter NIPA4	LOC_Os05g35060	DUF803 domain containing
TraesCS2A02G144800	black	Seedling	AT5G05140	MED26B	Probable mediator of RNA polymerase II transcription subunit 26b	LOC_Os07g44820	expressed protein
TraesCS5B02G517800	black	Seedling	AT3G12580	MED37C	Probable mediator of RNA polymerase II transcription subunit 37c	LOC_Os05g38530	DnaK family protein
TraesCS6D02G214300	black	Seedling	AT5G41000	YSL4	Probable metal-nicotianamine transporter YSL4	LOC_Os04g45860	transposon protein
TraesCS2B02G394500	black	Shared	AT5G41000	YSL4	Probable metal-nicotianamine transporter YSL4	LOC_Os04g45860	transposon protein
TraesCS1A02G154400	black	No DEG	AT3G23300		Probable methyltransferase PMT1	LOC_Os10g33720	methyltransferase
TraesCS3B02G279900	black	Seedling	AT3G02090	MPPBETA	Probable mitochondrial-processing peptidase subunit beta	LOC_Os01g51390	mitochondrial-processing peptidase subunit
TraesCS2D02G264400	black	Seedling	AT4G27270		Probable NAD(P)H dehydrogenase (quinone) FQR1-like 1	LOC_Os05g42190	NADPH-dependent FMN reductase domain containing protein
TraesCS2A02G237100	black	Seedling	AT5G27120	NOP5-1	Probable nucleolar protein 5-1	LOC_Os03g22730	nucleolar protein NOP5-1
TraesCS6B02G326500	black	Shared	AT1G70680	PXG5	Probable peroxygenase 5	LOC_Os02g50174	caleosin related protein
TraesCS7B02G110100	black	Shared	AT1G70680	PXG5	Probable peroxygenase 5	LOC_Os06g14370	caleosin related protein
TraesCS6B02G188300	black	Shared	AT1G23240	PXG7	Probable peroxygenase 7	LOC_Os06g14324	caleosin related protein
TraesCS7A02G154500	black	Shared	AT4G36670	PLT6	Probable polyol transporter 6	LOC_Os10g21590	transporter family protein
TraesCS3D02G205200	black	Seedling	AT1G68410		Probable protein phosphatase 2C 15	LOC_Os01g32964	protein phosphotase protein
TraesCS3A02G195600	black	No DEG	AT1G68410		Probable protein phosphatase 2C 15	LOC_Os01g32964	protein phosphotase protein
TraesCS5D02G188600	black	Seedling	AT2G29380	HAI3	Probable protein phosphatase 2C 24	LOC_Os09g15670	protein phosphatase 2C
TraesCS1A02G228100	black	Shared	AT3G05640		Probable protein phosphatase 2C 34	LOC_Os05g29030	protein phosphatase 2C
TraesCS1B02G242300	black	Shared	AT3G05640		Probable protein phosphatase 2C 34	LOC_Os05g29030	protein phosphatase 2C
TraesCS4A02G050000	black	Shared	AT4G33920		Probable protein phosphatase 2C 63	LOC_Os03g10950	protein phosphatase 2C
TraesCS4B02G254700	black	Germination	AT4G33920		Probable protein phosphatase 2C 63	LOC_Os03g10950	protein phosphatase 2C
TraesCS2D02G000300	black	Seedling	AT5G51760	AHG1	Probable protein phosphatase 2C 75	LOC_Os05g38290	protein phosphatase 2C
TraesCS2D02G561700	black	Shared	AT4G26390		Probable pyruvate kinase%2C cytosolic isozyme	LOC_Os04g58110	pyruvate kinase
TraesCS2A02G593000	black	Seedling	AT4G26390		Probable pyruvate kinase%2C cytosolic isozyme	LOC_Os04g58110	pyruvate kinase
TraesCS1B02G097700	black	No DEG	AT2G47060		Probable receptor-like protein kinase At2g47060	LOC_Os05g04520	protein kinase
TraesCS5B02G275700	black	Shared	AT2G24580		Probable sarcosine oxidase	LOC_Os09g32290	FAD dependent oxidoreductase domain containing protein
TraesCS1D02G381800	black	Seedling	AT1G18390		Probable serine/threonine-protein kinase At1g18390	LOC_Os05g47770	serine/threonine-protein kinase At1g18390 precursor
TraesCS3D02G046000	black	Seedling	AT1G18390		Probable serine/threonine-protein kinase At1g18390	LOC_Os01g04409	OsWAK1 - OsWAK receptor-like cytoplasmic kinase OsWAK-RLCK
TraesCSU02G206200	black	Shared	AT1G18390		Probable serine/threonine-protein kinase At1g18390	LOC_Os01g04470	expressed protein
TraesCS3A02G033000	black	No DEG	AT1G18390		Probable serine/threonine-protein kinase At1g18390	LOC_Os01g04450	OsWAK2 - OsWAK receptor-like cytoplasmic kinase OsWAK-RLCK
TraesCS5B02G239600	black	Seedling	AT5G02290	NAK	Probable serine/threonine-protein kinase NAK	LOC_Os03g60710	protein kinase domain containing protein
TraesCS2A02G190200	black	Shared	AT5G55560	WNK11	Probable serine/threonine-protein kinase WNK11	LOC_Os07g39520	STE_PAK_Ste20_Slob_Wnk.5 - STE kinases include homologs to sterile 7
TraesCS2D02G197600	black	Seedling	AT5G55560	WNK11	Probable serine/threonine-protein kinase WNK11	LOC_Os07g39520	STE_PAK_Ste20_Slob_Wnk.5 - STE kinases include homologs to sterile 7
TraesCS2B02G216800	black	Seedling	AT5G55560	WNK11	Probable serine/threonine-protein kinase WNK11	LOC_Os07g39520	STE_PAK_Ste20_Slob_Wnk.5 - STE kinases include homologs to sterile 7
TraesCS4B02G197600	black	Seedling	AT3G11320		Probable sugar phosphate/phosphate translocator At3g11320	LOC_Os03g17740	transporter
TraesCS3A02G288800	black	Shared	AT5G19600	SULTR3%3B5	Probable sulfate transporter 3.5	LOC_Os01g52130	sulfate transporter
TraesCS3B02G323500	black	Seedling	AT5G19600	SULTR3%3B5	Probable sulfate transporter 3.5	LOC_Os01g52130	sulfate transporter
TraesCS3D02G288600	black	Seedling	AT5G19600	SULTR3%3B5	Probable sulfate transporter 3.5	LOC_Os01g52130	sulfate transporter
TraesCS7D02G169300	black	Seedling	AT1G05000		Probable tyrosine-protein phosphatase At1g05000	LOC_Os06g10650	tyrosine phosphatase family protein
TraesCS3A02G157300	black	Shared	AT2G33770	UBC24	Probable ubiquitin-conjugating enzyme E2 24	LOC_Os01g13280	ubiquitin conjugating enzyme protein
TraesCS7D02G497400	black	Seedling	AT1G80840	WRKY40	Probable WRKY transcription factor 40	LOC_Os06g44010	WRKY28
TraesCS7B02G418500	black	Shared	AT1G80840	WRKY40	Probable WRKY transcription factor 40	LOC_Os06g44010	WRKY28
TraesCS7A02G508800	black	Seedling	AT1G80840	WRKY40	Probable WRKY transcription factor 40	LOC_Os06g44010	WRKY28
TraesCS2A02G161500	black	Shared	AT4G11070	WRKY41	Probable WRKY transcription factor 41	LOC_Os08g29660	WRKY69
TraesCS5D02G190700	black	Seedling	AT4G11070	WRKY41	Probable WRKY transcription factor 41	LOC_Os09g16510	WRKY74
TraesCS5A02G185600	black	Shared	AT4G11070	WRKY41	Probable WRKY transcription factor 41	LOC_Os09g16510	WRKY74
TraesCS2D02G168600	black	Seedling	AT4G11070	WRKY41	Probable WRKY transcription factor 41	LOC_Os08g29660	WRKY69
TraesCS5D02G190800	black	Seedling	AT4G11070	WRKY41	Probable WRKY transcription factor 41	LOC_Os09g16510	WRKY74
TraesCS2B02G187500	black	Shared	AT4G11070	WRKY41	Probable WRKY transcription factor 41	LOC_Os08g29660	WRKY69
TraesCS5B02G183700	black	Germination	AT4G11070	WRKY41	Probable WRKY transcription factor 41	LOC_Os09g16510	WRKY74
TraesCS7D02G345700	black	Seedling	AT2G46400	WRKY46	Probable WRKY transcription factor 46	LOC_Os05g25770	WRKY45
TraesCS5B02G183800	black	Shared	AT2G46400	WRKY46	Probable WRKY transcription factor 46	LOC_Os09g16510	WRKY74
TraesCS7A02G338500	black	Shared	AT2G46400	WRKY46	Probable WRKY transcription factor 46	LOC_Os05g25770	WRKY45
TraesCS1A02G358400	black	Shared	AT5G26170	WRKY50	Probable WRKY transcription factor 50	LOC_Os05g46020	WRKY7
TraesCS1D02G362900	black	Seedling	AT5G64810	WRKY51	Probable WRKY transcription factor 51	LOC_Os05g46020	WRKY7
TraesCS1D02G363300	black	Shared	AT5G64810	WRKY51	Probable WRKY transcription factor 51	LOC_Os05g46020	WRKY7
TraesCS5A02G185700	black	No DEG	AT4G23810	WRKY53	Probable WRKY transcription factor 53	LOC_Os09g16510	WRKY74
TraesCS2B02G517400	black	Seedling	AT3G56400	WRKY70	Probable WRKY transcription factor 70	LOC_Os05g25770	WRKY45
TraesCS2A02G489500	black	Seedling	AT3G56400	WRKY70	Probable WRKY transcription factor 70	LOC_Os05g25770	WRKY45
TraesCS2D02G489700	black	Seedling	AT3G56400	WRKY70	Probable WRKY transcription factor 70	LOC_Os05g25770	WRKY45
TraesCS3D02G242500	black	Seedling	AT1G29860	WRKY71	Probable WRKY transcription factor 71	LOC_Os01g47560	WRKY16
TraesCS7A02G096200	black	Shared	AT5G15130	WRKY72	Probable WRKY transcription factor 72	LOC_Os06g05380	WRKY73
TraesCS7A02G096300	black	Seedling	AT5G15130	WRKY72	Probable WRKY transcription factor 72	LOC_Os06g05380	WRKY73
TraesCS7B02G327400	black	Shared	AT4G25810	XTH23	Probable xyloglucan endotransglucosylase/hydrolase protein 23	LOC_Os06g48180	glycosyl hydrolases family 16
TraesCS1D02G336300	black	Seedling	AT2G14260	PIP	Proline iminopeptidase	LOC_Os05g43830	hydrolase
TraesCS1A02G333700	black	Seedling	AT2G14260	PIP	Proline iminopeptidase	LOC_Os05g43830	hydrolase
TraesCS6D02G288200	black	Seedling	AT5G40200	DEGP9	Protease Do-like 9	LOC_Os02g50880	OsDegp3 - Putative Deg protease homologue
TraesCS7B02G096100	black	Seedling	AT5G40200	DEGP9	Protease Do-like 9	LOC_Os06g12780	OsDegp10 - Putative Deg protease homologue
TraesCS2A02G040200	black	No DEG	AT5G15610		Proteasome component (PCI) domain protein	LOC_Os04g01290	proteasome subunit
TraesCS3B02G319500	black	No DEG	AT1G16470	PAB1	Proteasome subunit alpha type-2-A	LOC_Os02g42320	peptidase
TraesCS7B02G008100	black	Seedling	AT1G13060	PBE1	Proteasome subunit beta type-5-A	LOC_Os06g06030	peptidase
TraesCS1A02G413900	black	Seedling	AT4G31300	PBA1	Proteasome subunit beta type-6	LOC_Os06g04800	peptidase
TraesCS1D02G123600	black	Seedling	AT5G40580	PBB2	Proteasome subunit beta type-7-B	LOC_Os05g09490	peptidase
TraesCS3D02G228600	black	Seedling	AT2G46225	ABIL1	Protein ABIL1	LOC_Os01g43420	expressed protein
TraesCS6B02G089500	black	Seedling	AT5G42480	ARC6	Protein ACCUMULATION AND REPLICATION OF CHLOROPLASTS 6%2C chloroplastic	LOC_Os02g03000	division protein
TraesCS3A02G299200	black	Seedling	AT5G65770	CRWN4	Protein CROWDED NUCLEI 4	LOC_Os01g56140	expressed protein
TraesCS5B02G141900	black	Shared	AT5G53950	NAC098	Protein CUP-SHAPED COTYLEDON 2	LOC_Os12g03050	no apical meristem protein
TraesCS5D02G148900	black	Shared	AT5G53950	NAC098	Protein CUP-SHAPED COTYLEDON 2	LOC_Os12g03050	no apical meristem protein
TraesCS5A02G143100	black	Seedling	AT5G53950	NAC098	Protein CUP-SHAPED COTYLEDON 2	LOC_Os12g03050	no apical meristem protein
TraesCS4B02G101800	black	Seedling	AT1G21750	PDIL1-1	Protein disulfide isomerase-like 1-1	LOC_Os11g09280	OsPDIL1-1 protein disulfide isomerase PDIL1-1
TraesCS1D02G106500	black	Seedling	AT2G47470	PDIL2-1	Protein disulfide-isomerase like 2-1	LOC_Os05g06430	OsPDIL2-1 protein disulfide isomerase PDIL2-1
TraesCS1B02G126100	black	Seedling	AT2G47470	PDIL2-1	Protein disulfide-isomerase like 2-1	LOC_Os05g06430	OsPDIL2-1 protein disulfide isomerase PDIL2-1
TraesCS3D02G144800	black	Seedling	AT1G53280	DJ1B	Protein DJ-1 homolog B	LOC_Os01g11880	DJ-1 family protein
TraesCS7B02G246500	black	Seedling	AT4G34020	DJ1C	Protein DJ-1 homolog C	LOC_Os05g44330	DJ-1 family protein
TraesCS6D02G208500	black	Seedling	AT1G02205	CER1	Protein ECERIFERUM 1	LOC_Os02g40784	WAX2
TraesCS4A02G437200	black	Seedling	AT5G45560	EDR2L	Protein ENHANCED DISEASE RESISTANCE 2-like	LOC_Os02g01270	START domain containing protein
TraesCS7B02G294300	black	Shared	AT3G30725	GDU6	Protein GLUTAMINE DUMPER 6	LOC_Os06g42660	expressed protein
TraesCS6A02G187400	black	Germination	AT5G25930		Protein kinase family protein with leucine-rich repeat domain	LOC_Os02g12910	receptor-like protein kinase 5 precursor
TraesCS4A02G207800	black	Germination	AT5G42440		Protein kinase superfamily protein	LOC_Os11g06780	serine/threonine-protein kinase BRI1-like 1 precursor
TraesCS3A02G344400	black	Seedling	AT3G08760	ATSIK	Protein kinase superfamily protein	LOC_Os01g60700	serine/threonine-protein kinase NAK
TraesCS1A02G141300	black	Shared	AT5G03320		Protein kinase superfamily protein	LOC_Os10g30600	tyrosine protein kinase domain containing protein
TraesCS4D02G109000	black	Shared	AT5G42440		Protein kinase superfamily protein	LOC_Os11g06780	serine/threonine-protein kinase BRI1-like 1 precursor
TraesCS7A02G329200	black	Shared	AT3G09010		Protein kinase superfamily protein	LOC_Os04g58250	protein kinase
TraesCS6B02G367100	black	Shared	AT2G05940		Protein kinase superfamily protein	LOC_Os02g53750	tyrosine protein kinase domain containing protein
TraesCS2D02G388000	black	Shared	AT3G09830		Protein kinase superfamily protein	LOC_Os02g43430	protein kinase domain containing protein
TraesCS3D02G337900	black	Seedling	AT3G08760	ATSIK	Protein kinase superfamily protein	LOC_Os01g60700	serine/threonine-protein kinase NAK
TraesCS2A02G525300	black	Shared	AT3G09830		Protein kinase superfamily protein	LOC_Os02g57420	protein kinase APK1A
TraesCS1D02G140300	black	Seedling	AT5G03320		Protein kinase superfamily protein	LOC_Os10g30600	tyrosine protein kinase domain containing protein
TraesCS2D02G528200	black	Seedling	AT3G09830		Protein kinase superfamily protein	LOC_Os02g57420	protein kinase APK1A
TraesCS6D02G316600	black	Seedling	AT2G05940		Protein kinase superfamily protein	LOC_Os02g53750	tyrosine protein kinase domain containing protein
TraesCS1B02G157700	black	Shared	AT5G03320		Protein kinase superfamily protein	LOC_Os10g30600	tyrosine protein kinase domain containing protein
TraesCS3A02G001500	black	Seedling	AT1G62400	HT1	Protein kinase superfamily protein	LOC_Os01g01740	protein kinase domain containing protein
TraesCS4D02G293200	black	Seedling	AT2G05940		Protein kinase superfamily protein	LOC_Os03g08170	protein kinase APK1B
TraesCS6A02G336600	black	Seedling	AT2G05940		Protein kinase superfamily protein	LOC_Os02g53750	tyrosine protein kinase domain containing protein
TraesCS3B02G376300	black	Shared	AT3G08760	ATSIK	Protein kinase superfamily protein	LOC_Os01g60700	serine/threonine-protein kinase NAK
TraesCS6B02G434800	black	Seedling	AT3G09830		Protein kinase superfamily protein	LOC_Os02g57420	protein kinase APK1A
TraesCS3D02G497300	black	Seedling	AT5G12330	LRP1	Protein LATERAL ROOT PRIMORDIUM 1	LOC_Os01g72490	LRP1
TraesCS7D02G307000	black	Shared	AT4G20380	LSD1	Protein LSD1	LOC_Os08g03610	LSD1 zinc finger domain containing protein
TraesCS7A02G310500	black	Seedling	AT4G20380	LSD1	Protein LSD1	LOC_Os08g03610	LSD1 zinc finger domain containing protein
TraesCS1B02G314000	black	Shared	AT2G38640		Protein LURP-one-related 8	LOC_Os05g40630	DUF567 domain containing protein
TraesCS1D02G303100	black	Shared	AT2G38640		Protein LURP-one-related 8	LOC_Os05g40630	DUF567 domain containing protein
TraesCS1A02G303600	black	Shared	AT2G38640		Protein LURP-one-related 8	LOC_Os05g40630	DUF567 domain containing protein
TraesCS1A02G005400	black	Shared	AT4G39810	NEN4	Protein NEN4	LOC_Os05g01200	exonuclease
TraesCS7B02G020500	black	Germination	AT3G45680	NPF2.3	Protein NRT1/ PTR FAMILY 2.3	LOC_Os05g27304	peptide transporter PTR2
TraesCS7D02G119800	black	No DEG	AT3G45650	NPF2.7	Protein NRT1/ PTR FAMILY 2.7	LOC_Os05g27304	peptide transporter PTR2
TraesCS1D02G214300	black	Shared	AT1G12110	NPF6.3	Protein NRT1/ PTR FAMILY 6.3	LOC_Os10g40600	peptide transporter PTR2
TraesCS1B02G225000	black	Seedling	AT1G12110	NPF6.3	Protein NRT1/ PTR FAMILY 6.3	LOC_Os10g40600	peptide transporter PTR2
TraesCS5B02G414000	black	Seedling	AT3G21670	NPF6.4	Protein NRT1/ PTR FAMILY 6.4	LOC_Os04g39030	peptide transporter PTR2
TraesCS3D02G385600	black	No DEG	AT3G54140	NPF8.1	Protein NRT1/ PTR FAMILY 8.1	LOC_Os01g67630	peptide transporter PTR2
TraesCS2A02G443700	black	Seedling	AT2G02040	NPF8.3	Protein NRT1/ PTR FAMILY 8.3	LOC_Os04g50930	peptide transporter PTR2
TraesCS2B02G464900	black	No DEG	AT1G62200	NPF8.5	Protein NRT1/ PTR FAMILY 8.5	LOC_Os04g50930	peptide transporter PTR2
TraesCS4D02G191600	black	Seedling	AT1G13520		Protein of unknown function (DUF1262)	LOC_Os08g31850	expressed protein
TraesCS2D02G288900	black	Shared	AT5G47900		Protein of unknown function (DUF1624)	LOC_Os04g33200	heparan-alpha-glucosaminide N-acetyltransferase
TraesCS2A02G291000	black	Shared	AT5G47900		Protein of unknown function (DUF1624)	LOC_Os04g33200	heparan-alpha-glucosaminide N-acetyltransferase
TraesCS2B02G307400	black	Shared	AT5G47900		Protein of unknown function (DUF1624)	LOC_Os04g33200	heparan-alpha-glucosaminide N-acetyltransferase
TraesCS3D02G267200	black	Seedling	AT4G20300		Protein of unknown function (DUF1639)	LOC_Os01g48830	expressed protein
TraesCS3D02G223400	black	Seedling	AT1G70420		Protein of unknown function (DUF1645)	LOC_Os01g45250	DUF1645 domain containing protein
TraesCS7A02G173100	black	Shared	AT2G15760		Protein of unknown function (DUF1645)	LOC_Os06g11150	DUF1645 domain containing protein
TraesCS3B02G259200	black	Seedling	AT1G70420		Protein of unknown function (DUF1645)	LOC_Os01g45250	DUF1645 domain containing protein
TraesCS3A02G229900	black	Seedling	AT1G70420		Protein of unknown function (DUF1645)	LOC_Os01g45250	DUF1645 domain containing protein
TraesCS4D02G282600	black	Seedling	AT5G39530		Protein of unknown function (DUF1997)	LOC_Os03g07200	expressed protein
TraesCS4B02G283800	black	Shared	AT5G39530		Protein of unknown function (DUF1997)	LOC_Os03g07200	expressed protein
TraesCS4A02G019800	black	Shared	AT5G39530		Protein of unknown function (DUF1997)	LOC_Os03g07200	expressed protein
TraesCS3D02G330200	black	Seedling	AT3G08640		Protein of unknown function (DUF3411)	LOC_Os01g59740	expressed protein
TraesCS7D02G385800	black	Shared	AT3G20300		Protein of unknown function (DUF3537)	LOC_Os06g42850	extracellular ligand-gated ion channel
TraesCS7B02G291600	black	Shared	AT3G20300		Protein of unknown function (DUF3537)	LOC_Os06g42850	extracellular ligand-gated ion channel
TraesCS1B02G222600	black	Seedling	AT4G00440		Protein of unknown function (DUF3741)	LOC_Os10g40250	expressed protein
TraesCS5A02G103500	black	Seedling	AT3G19340		Protein of unknown function (DUF3754)	LOC_Os12g29550	expressed protein
TraesCS5A02G191000	black	Seedling	AT1G22160		Protein of unknown function (DUF581)	LOC_Os09g20240	DUF581 domain containing protein
TraesCS4A02G237300	black	Seedling	AT3G19540		Protein of unknown function (DUF620)	LOC_Os03g40930	expressed protein
TraesCS4D02G210300	black	Shared	AT5G51670		Protein of unknown function (DUF668)	LOC_Os03g16390	avr9/Cf-9 rapidly elicited protein
TraesCS4A02G094900	black	Seedling	AT5G51670		Protein of unknown function (DUF668)	LOC_Os03g16390	avr9/Cf-9 rapidly elicited protein
TraesCS5A02G458100	black	No DEG	AT3G23160		Protein of unknown function (DUF668)	LOC_Os04g08764	avr9/Cf-9 rapidly elicited protein 137
TraesCS4A02G264500	black	Seedling	AT3G17800		Protein of unknown function (DUF760)	LOC_Os03g50870	expressed protein
TraesCS6A02G026100	black	Germination	AT1G74450		Protein of unknown function (DUF793)	LOC_Os02g01930	expressed protein
TraesCS3B02G317400	black	Seedling	AT2G34340		Protein of unknown function%2C DUF584	LOC_Os01g52740	expressed protein
TraesCS2A02G222500	black	Shared	AT1G61930		Protein of unknown function%2C DUF584	LOC_Os07g33270	DUF584 domain containing protein
TraesCS3D02G249000	black	Seedling	AT1G72770	HAB1	Protein phosphatase 2C 16	LOC_Os05g46040	protein phosphatase 2C
TraesCS3B02G277900	black	Seedling	AT1G72770	HAB1	Protein phosphatase 2C 16	LOC_Os05g46040	protein phosphatase 2C
TraesCS4B02G210100	black	Shared	AT1G07430	AIP1	Protein phosphatase 2C 3	LOC_Os03g16170	protein phosphatase 2C
TraesCS5D02G507500	black	Shared	AT1G14870	PCR2	Protein PLANT CADMIUM RESISTANCE 2	LOC_Os03g61470	uncharacterized Cys-rich domain containing protein
TraesCS5D02G507800	black	Seedling	AT1G14870	PCR2	Protein PLANT CADMIUM RESISTANCE 2	LOC_Os03g61470	uncharacterized Cys-rich domain containing protein
TraesCS4A02G365700	black	Seedling	AT1G14870	PCR2	Protein PLANT CADMIUM RESISTANCE 2	LOC_Os03g61470	uncharacterized Cys-rich domain containing protein
TraesCS5B02G507500	black	Seedling	AT1G14870	PCR2	Protein PLANT CADMIUM RESISTANCE 2	LOC_Os03g61470	uncharacterized Cys-rich domain containing protein
TraesCS6A02G261100	black	Seedling	AT5G17300	RVE1	Protein REVEILLE 1	LOC_Os02g46030	MYB family transcription factor
TraesCS6D02G241900	black	Seedling	AT5G17300	RVE1	Protein REVEILLE 1	LOC_Os02g46030	MYB family transcription factor
TraesCS3A02G250100	black	Seedling	AT2G26070	RTE1	Protein REVERSION-TO-ETHYLENE SENSITIVITY1	LOC_Os01g51430	green ripe-like
TraesCS2B02G399100	black	Seedling	AT2G31190	RUS2	Protein root UVB sensitive 2%2C chloroplastic	LOC_Os04g43690	DUF647 domain containing protein
TraesCS3D02G403000	black	Seedling	AT1G17020	SRG1	Protein SRG1	LOC_Os03g63900	1-aminocyclopropane-1-carboxylate oxidase 2
TraesCS5D02G325900	black	Seedling	AT4G22920	SGR1	Protein STAY-GREEN 1%2C chloroplastic	LOC_Os09g36200	senescence-inducible chloroplast stay-green protein 1
TraesCS5B02G320200	black	Shared	AT4G22920	SGR1	Protein STAY-GREEN 1%2C chloroplastic	LOC_Os09g36200	senescence-inducible chloroplast stay-green protein 1
TraesCS5A02G319900	black	Shared	AT4G11910	SGR2	Protein STAY-GREEN 2%2C chloroplastic	LOC_Os09g36200	senescence-inducible chloroplast stay-green protein 1
TraesCS7B02G395000	black	Seedling	AT4G03390	SRF3	Protein STRUBBELIG-RECEPTOR FAMILY 3	LOC_Os06g45020	STRUBBELIG-RECEPTOR FAMILY 3 precursor
TraesCS7D02G386000	black	Germination	AT4G22130	SRF8	Protein STRUBBELIG-RECEPTOR FAMILY 8	LOC_Os02g09740	STRUBBELIG-RECEPTOR FAMILY 7 precursor
TraesCS5B02G211000	black	No DEG	AT1G19180	TIFY10A	Protein TIFY 10A	LOC_Os09g26780	zinc-finger protein
TraesCS5A02G212800	black	Shared	AT1G74950	TIFY10B	Protein TIFY 10B	LOC_Os09g26780	zinc-finger protein
TraesCS4B02G106800	black	No DEG	AT3G44340	CEF	Protein transport protein Sec24-like CEF	LOC_Os11g29200	protein transport protein
TraesCS4A02G202700	black	No DEG	AT3G44340	CEF	Protein transport protein Sec24-like CEF	LOC_Os11g29200	protein transport protein
TraesCS1A02G133900	black	Seedling	AT4G01080	TBL26	Protein trichome birefringence-like 26	LOC_Os05g12380	expressed protein
TraesCS3D02G113100	black	Seedling	AT2G02710	TLP1	Protein TWIN LOV 1	LOC_Os01g09120	Twin LOV 1
TraesCS2B02G603200	black	Shared	AT2G35980	YLS9	Protein YLS9	LOC_Os04g58850	harpin-induced protein 1 domain containing protein
TraesCS4A02G218000	black	Shared	AT5G13750	ZIFL1	Protein ZINC INDUCED FACILITATOR-LIKE 1	LOC_Os12g03899	major facilitator superfamily antiporter
TraesCS4A02G073800	black	Shared	AT1G14700	PAP3	Purple acid phosphatase 3	LOC_Os03g13540	Ser/Thr protein phosphatase family protein
TraesCS4D02G231400	black	Shared	AT1G14700	PAP3	Purple acid phosphatase 3	LOC_Os03g13540	Ser/Thr protein phosphatase family protein
TraesCS4B02G230000	black	Shared	AT1G14700	PAP3	Purple acid phosphatase 3	LOC_Os03g13540	Ser/Thr protein phosphatase family protein
TraesCS4B02G035800	black	Seedling	AT2G40090	ATATH9	Putative ABC1 protein At2g40090	LOC_Os11g34750	ABC1 family domain containing protein
TraesCS7D02G188800	black	Shared	AT5G37810	NIP4-1	Putative aquaporin NIP4-1	LOC_Os06g12310	aquaporin protein
TraesCS5B02G259600	black	Shared	AT1G04970		Putative BPI/LBP family protein At1g04970	LOC_Os09g30474	BPI/LBP family protein At3g20270 precursor
TraesCS1A02G215700	black	Seedling	AT2G44680	CKB4	Putative casein kinase II subunit beta-4	LOC_Os10g41520	casein kinase II subunit beta-4
TraesCS5B02G457100	black	Shared	AT5G33280	CBSCLC6	Putative chloride channel-like protein CLC-g	LOC_Os08g20570	chloride channel protein
TraesCS5A02G449500	black	No DEG	AT5G33280	CBSCLC6	Putative chloride channel-like protein CLC-g	LOC_Os04g55210	chloride channel protein
TraesCS3D02G031000	black	Seedling	AT3G14460		Putative disease resistance protein At3g14460	LOC_Os10g04570	expressed protein
TraesCS3D02G314400	black	Shared	AT3G14460		Putative disease resistance protein At3g14460	LOC_Os01g57280	rp1
TraesCSU02G153000	black	Seedling	AT3G14460		Putative disease resistance protein At3g14460	LOC_Os11g10550	NBS-LRR disease resistance protein
TraesCS1A02G354000	black	Seedling	AT3G14470	RPPL1	Putative disease resistance RPP13-like protein 1	LOC_Os05g45690	expressed protein
TraesCS7A02G103200	black	Germination	AT3G14470	RPPL1	Putative disease resistance RPP13-like protein 1	LOC_Os12g25170	NB-ARC domain containing disease resistance protein
TraesCS4D02G366400	black	Seedling	AT3G14470	RPPL1	Putative disease resistance RPP13-like protein 1	LOC_Os02g16060	RGA-1
TraesCS6D02G117500	black	Shared	AT3G14470	RPPL1	Putative disease resistance RPP13-like protein 1	LOC_Os06g49390	NBS-LRR disease resistance protein
TraesCSU02G113800	black	Seedling	AT3G14470	RPPL1	Putative disease resistance RPP13-like protein 1	LOC_Os11g10550	NBS-LRR disease resistance protein
TraesCS7B02G071200	black	Seedling	AT3G46710	RPP13L2	Putative disease resistance RPP13-like protein 2	LOC_Os08g14850	resistance protein
TraesCS6A02G120000	black	Shared	AT3G46730	RPP13L3	Putative disease resistance RPP13-like protein 3	LOC_Os08g10440	NBS-LRR disease resistance protein
TraesCS2D02G311900	black	Shared	AT4G05490	FBL22	Putative F-box/LRR-repeat protein 22	LOC_Os08g09450	OsFBL41 - F-box domain and LRR containing protein
TraesCS2A02G313400	black	Shared	AT4G05490	FBL22	Putative F-box/LRR-repeat protein 22	LOC_Os08g09450	OsFBL41 - F-box domain and LRR containing protein
TraesCS6D02G107300	black	Seedling	AT5G02700		Putative F-box/LRR-repeat protein At5g02700	LOC_Os07g18560	OsFBLD6 - F-box
TraesCS1D02G131300	black	Seedling	AT5G43745		Putative ion channel POLLUX-like 2	LOC_Os03g06720	expressed protein
TraesCS1A02G135600	black	Seedling	AT5G43745		Putative ion channel POLLUX-like 2	LOC_Os03g06720	expressed protein
TraesCS2B02G202000	black	Seedling	AT3G29770	MES11	Putative methylesterase 11%2C chloroplastic	LOC_Os07g41230	esterase
TraesCS7D02G457300	black	Shared	AT1G14600		Putative Myb family transcription factor At1g14600	LOC_Os06g45890	MYB family transcription factor
TraesCS2B02G218600	black	Seedling	AT2G16120	PLT1	Putative polyol transporter 1	LOC_Os07g39350	transporter family protein
TraesCS5D02G263300	black	Seedling	AT3G47110		Putative receptor-like protein kinase At3g47110	LOC_Os10g22860	receptor kinase
TraesCS5D02G456100	black	Seedling	AT3G55950	CCR3	Putative serine/threonine-protein kinase-like protein CCR3	LOC_Os12g31560	protein kinase
TraesCS3D02G210600	black	Shared	AT5G56960	BHLH41	Putative transcription factor bHLH041	LOC_Os01g39330	helix-loop-helix DNA-binding domain containing protein
TraesCS2D02G431500	black	Shared	AT5G57540	XTH13	Putative xyloglucan endotransglucosylase/hydrolase protein 13	LOC_Os04g51520	glycosyl hydrolases family 16
TraesCS3D02G124300	black	Seedling	AT1G80360		Pyridoxal phosphate (PLP)-dependent transferases superfamily protein	LOC_Os01g08270	aminotransferase
TraesCS3B02G141600	black	Seedling	AT1G80360		Pyridoxal phosphate (PLP)-dependent transferases superfamily protein	LOC_Os01g08270	aminotransferase
TraesCS3D02G104500	black	Seedling	AT5G54960	PDC2	Pyruvate decarboxylase 2	LOC_Os01g06660	thiamine pyrophosphate enzyme
TraesCS7A02G238900	black	Seedling	AT1G24180	IAR4	Pyruvate dehydrogenase E1 component subunit alpha-2%2C mitochondrial	LOC_Os06g13720	dehydrogenase E1 component domain containing protein
TraesCS7D02G199900	black	Seedling	AT1G24180	IAR4	Pyruvate dehydrogenase E1 component subunit alpha-2%2C mitochondrial	LOC_Os06g13720	dehydrogenase E1 component domain containing protein
TraesCS4D02G126900	black	Seedling	AT4G00340	RLK4	receptor-like protein kinase 4	LOC_Os12g03650	D-mannose binding lectin family protein
TraesCS3A02G308100	black	Seedling	AT3G46290	HERK1	Receptor-like protein kinase HERK 1	LOC_Os01g06280	TKL_IRAK_CrRLK1L-1.4 - The CrRLK1L-1 subfamily has homology to the CrRLK1L homolog
TraesCS5A02G514500	black	Germination	AT3G46290	HERK1	Receptor-like protein kinase HERK 1	LOC_Os03g03280	TKL_IRAK_CrRLK1L-1.6 - The CrRLK1L-1 subfamily has homology to the CrRLK1L homolog
TraesCS3A02G167100	black	Shared	AT1G78530		Receptor-like serine/threonine-protein kinase At1g78530	LOC_Os01g14510	BRASSINOSTEROID INSENSITIVE 1 precursor
TraesCS7A02G512100	black	Seedling	AT2G45590		Receptor-like serine/threonine-protein kinase At2g45590	LOC_Os03g14710	protein kinase
TraesCS1B02G333300	black	Shared	AT4G21380	SD18	Receptor-like serine/threonine-protein kinase SD1-8	LOC_Os05g42210	serine/threonine-protein kinase receptor precursor
TraesCS3B02G352300	black	Seedling	AT4G21380	SD18	Receptor-like serine/threonine-protein kinase SD1-8	LOC_Os03g35600	serine/threonine-protein kinase receptor precursor
TraesCS3B02G318700	black	Seedling	AT5G11580		Regulator of chromosome condensation (RCC1) family protein	LOC_Os01g52630	regulator of chromosome condensation
TraesCS4D02G044800	black	Shared	AT1G13340		Regulator of Vps4 activity in the MVB pathway protein	LOC_Os03g50210	DUF292 domain containing protein
TraesCS2D02G206900	black	Seedling	AT3G57540		Remorin family protein	LOC_Os07g38170	remorin
TraesCS2B02G226600	black	Shared	AT2G41870		Remorin family protein	LOC_Os07g38170	remorin
TraesCS2A02G199300	black	Shared	AT3G57540		Remorin family protein	LOC_Os07g38170	remorin
TraesCS2D02G163300	black	Seedling	AT2G02990	RNS1	Ribonuclease 1	LOC_Os07g43670	ribonuclease T2 family domain containing protein
TraesCS4B02G149200	black	Seedling	AT2G21790	RNR1	Ribonucleoside-diphosphate reductase large subunit	LOC_Os06g07210	ribonucleoside-diphosphate reductase large subunit
TraesCS4A02G177600	black	Seedling	AT2G39730	RCA	Ribulose bisphosphate carboxylase/oxygenase activase%2C chloroplastic	LOC_Os11g47970	AAA-type ATPase family protein
TraesCS4D02G134900	black	Seedling	AT2G39730	RCA	Ribulose bisphosphate carboxylase/oxygenase activase%2C chloroplastic	LOC_Os11g47970	AAA-type ATPase family protein
TraesCS3D02G264100	black	Seedling	AT2G01275		RING/FYVE/PHD zinc finger superfamily protein	LOC_Os01g49280	zinc finger family protein
TraesCS7D02G282300	black	No DEG	AT1G11020		RING/FYVE/PHD zinc finger superfamily protein	LOC_Os08g29590	zinc finger
TraesCS3D02G384200	black	Seedling	AT1G24440		RING/U-box superfamily protein	LOC_Os01g67850	zinc finger
TraesCS1D02G155700	black	Seedling	AT2G45530		RING/U-box superfamily protein	LOC_Os01g66970	zinc finger
TraesCS6D02G005100	black	No DEG	AT5G60580		RING/U-box superfamily protein	LOC_Os06g23274	zinc finger
TraesCS1A02G158400	black	Seedling	AT2G45530		RING/U-box superfamily protein	LOC_Os05g11720	zinc finger
TraesCS2B02G193500	black	Seedling	AT1G72310	ATL3	RING-H2 finger protein ATL3	LOC_Os07g42610	RING finger protein
TraesCS5D02G405300	black	Shared	AT1G72310	ATL3	RING-H2 finger protein ATL3	LOC_Os03g28080	ring-H2 zinc finger protein
TraesCS5A02G396000	black	Seedling	AT1G72310	ATL3	RING-H2 finger protein ATL3	LOC_Os03g28080	ring-H2 zinc finger protein
TraesCS1A02G215100	black	Shared	AT5G40250	ATL46	RING-H2 finger protein ATL46	LOC_Os10g41660	zinc finger
TraesCS1D02G217700	black	Shared	AT5G40250	ATL46	RING-H2 finger protein ATL46	LOC_Os10g41660	zinc finger
TraesCS6B02G291300	black	Seedling	AT5G17600	ATL52	RING-H2 finger protein ATL52	LOC_Os02g46600	RING-H2 finger protein ATL5G
TraesCS4B02G109300	black	Germination	AT2G34750		RNA polymerase I specific transcription initiation factor RRN3 protein	LOC_Os06g47350	RNA polymerase I specific transcription initiation factor RRN3 family protein
TraesCS3D02G161300	black	No DEG	AT5G25754		RNA polymerase I-associated factor PAF67	LOC_Os01g12870	eukaryotic translation initiation factor 3 subunit E-interacting protein
TraesCS7B02G266900	black	Seedling	AT5G40490		RNA-binding (RRM/RBD/RNP motifs) family protein	LOC_Os02g12850	RNA recognition motif containing protein
TraesCS6A02G318100	black	Shared	AT1G78260		RNA-binding (RRM/RBD/RNP motifs) family protein	LOC_Os02g51890	RNA recognition motif containing protein
TraesCS7B02G245400	black	Seedling	AT5G53060		RNA-binding KH domain-containing protein	LOC_Os06g23460	KH domain containing protein
TraesCS2A02G319600	black	Seedling	AT4G11130	RDR2	RNA-dependent RNA polymerase 2	LOC_Os04g39160	RNA-dependent RNA polymerase
TraesCS5B02G339200	black	Seedling	AT4G38430	ROPGEF1	Rop guanine nucleotide exchange factor 1	LOC_Os09g37270	ATROPGEF7/ROPGEF7
TraesCS1A02G245500	black	Seedling	AT3G60910		S-adenosyl-L-methionine-dependent methyltransferases superfamily protein	LOC_Os05g32590	methyltransferase
TraesCS7A02G364100	black	Seedling	AT4G33110		S-adenosyl-L-methionine-dependent methyltransferases superfamily protein	LOC_Os06g37610	Cyclopropane-fatty-acyl-phospholipid synthase
TraesCS1B02G256500	black	Seedling	AT3G60910		S-adenosyl-L-methionine-dependent methyltransferases superfamily protein	LOC_Os05g32590	methyltransferase
TraesCS6A02G329100	black	No DEG	AT4G00880		SAUR-like auxin-responsive protein family	LOC_Os02g52990	OsSAUR12 - Auxin-responsive SAUR gene family member
TraesCS4D02G136500	black	Seedling	AT1G07530	SCL14	Scarecrow-like protein 14	LOC_Os11g47870	GRAS family transcription factor domain containing protein
TraesCS7B02G280200	black	Shared	AT5G47730		Sec14p-like phosphatidylinositol transfer family protein	LOC_Os02g10650	CRAL/TRIO domain containing protein
TraesCS3A02G422100	black	Seedling	AT4G14030	SBP1	Selenium-binding protein 1	LOC_Os01g68770	selenium-binding protein
TraesCS3D02G417500	black	Seedling	AT4G14030	SBP1	Selenium-binding protein 1	LOC_Os01g68770	selenium-binding protein
TraesCS5A02G365800	black	Shared	AT5G45890	SAG12	Senescence-specific cysteine protease SAG12	LOC_Os09g38920	thiol protease SEN102 precursor
TraesCS5B02G368300	black	Seedling	AT5G45890	SAG12	Senescence-specific cysteine protease SAG12	LOC_Os09g38920	thiol protease SEN102 precursor
TraesCS2A02G424900	black	Seedling	AT1G43860		sequence-specific DNA binding transcription factors	LOC_Os08g01620	shwachman-Bodian-Diamond syndrome protein
TraesCS5B02G392200	black	Seedling	AT3G53030	SRPK4	ser/arg-rich protein kinase 4	LOC_Os03g53720	SRPK4
TraesCS6D02G032900	black	Seedling	AT5G09640	SCPL19	Serine carboxypeptidase-like 19	LOC_Os11g24510	OsSCP56 - Putative Serine Carboxypeptidase homologue
TraesCS3D02G287800	black	Seedling	AT1G73300	SCPL2	Serine carboxypeptidase-like 2	LOC_Os10g01134	OsSCP46 - Putative Serine Carboxypeptidase homologue
TraesCS2B02G157100	black	Shared	AT3G63470	SCPL40	Serine carboxypeptidase-like 40	LOC_Os07g46350	OsSCP40 - Putative Serine Carboxypeptidase homologue
TraesCS4D02G103600	black	Seedling	AT5G42240	SCPL42	Serine carboxypeptidase-like 42	LOC_Os11g10750	OsSCP48 - Putative Serine Carboxypeptidase homologue
TraesCS7B02G021500	black	Seedling	AT1G73270	SCPL6	Serine carboxypeptidase-like 6	LOC_Os02g46260	OsSCP9 - Putative Serine Carboxypeptidase homologue
TraesCS3B02G580500	black	Seedling	AT1G43710	SDC	Serine decarboxylase	LOC_Os02g33710	decarboxylase
TraesCS2B02G184300	black	Shared	AT2G38900		Serine protease inhibitor%2C potato inhibitor I-type family protein	LOC_Os01g42860	inhibitor I family protein
TraesCS2D02G165600	black	Seedling	AT2G38900		Serine protease inhibitor%2C potato inhibitor I-type family protein	LOC_Os01g42860	inhibitor I family protein
TraesCS2A02G158600	black	Seedling	AT5G43580		Serine protease inhibitor%2C potato inhibitor I-type family protein	LOC_Os01g42860	inhibitor I family protein
TraesCS2D02G165500	black	Shared	AT5G43580		Serine protease inhibitor%2C potato inhibitor I-type family protein	LOC_Os01g42860	inhibitor I family protein
TraesCS2D02G165800	black	Seedling	AT2G38900		Serine protease inhibitor%2C potato inhibitor I-type family protein	LOC_Os01g42860	inhibitor I family protein
TraesCS2B02G184400	black	Seedling	AT2G38900		Serine protease inhibitor%2C potato inhibitor I-type family protein	LOC_Os01g42860	inhibitor I family protein
TraesCS2A02G158800	black	Seedling	AT2G38900		Serine protease inhibitor%2C potato inhibitor I-type family protein	LOC_Os01g42860	inhibitor I family protein
TraesCS3A02G093900	black	Seedling	AT2G38870		Serine protease inhibitor%2C potato inhibitor I-type family protein	LOC_Os12g25090	expressed protein
TraesCS3D02G094200	black	Shared	AT2G38870		Serine protease inhibitor%2C potato inhibitor I-type family protein	LOC_Os12g36240	inhibitor I family protein
TraesCS2A02G158700	black	Seedling	AT2G38900		Serine protease inhibitor%2C potato inhibitor I-type family protein	LOC_Os01g42860	inhibitor I family protein
TraesCS2B02G189600	black	Seedling	AT1G78290	SRK2C	Serine/threonine-protein kinase SRK2C	LOC_Os07g42940	CAMK_CAMK_like.7 - CAMK includes calcium/calmodulin depedent protein kinases
TraesCS2D02G170700	black	Seedling	AT1G78290	SRK2C	Serine/threonine-protein kinase SRK2C	LOC_Os07g42940	CAMK_CAMK_like.7 - CAMK includes calcium/calmodulin depedent protein kinases
TraesCS2D02G093700	black	Seedling	AT1G50240	TIO	Serine/threonine-protein kinase TIO	LOC_Os12g24550	expressed protein
TraesCS2D02G306700	black	Seedling	AT5G47850	CCR4	Serine/threonine-protein kinase-like protein CCR4	LOC_Os04g35890	TKL_IRAK_CR4L.3 - The CR4L subfamily has homology with Crinkly4
TraesCS2D02G032100	black	Seedling	AT1G47710		Serpin-ZX	LOC_Os11g12520	serpin domain containing protein
TraesCS5D02G342700	black	Shared	AT5G48930	HST	Shikimate O-hydroxycinnamoyltransferase	LOC_Os09g37200	transferase family protein
TraesCS6D02G241700	black	Seedling	AT5G48930	HST	Shikimate O-hydroxycinnamoyltransferase	LOC_Os08g43040	transferase family protein
TraesCS1D02G089900	black	Seedling	AT5G48930	HST	Shikimate O-hydroxycinnamoyltransferase	LOC_Os10g23820	transferase family protein
TraesCS6A02G260900	black	Shared	AT5G48930	HST	Shikimate O-hydroxycinnamoyltransferase	LOC_Os08g43040	transferase family protein
TraesCS1A02G088300	black	Seedling	AT5G48930	HST	Shikimate O-hydroxycinnamoyltransferase	LOC_Os10g23820	transferase family protein
TraesCS7A02G537300	black	Shared	AT5G48930	HST	Shikimate O-hydroxycinnamoyltransferase	LOC_Os09g25460	transferase family protein
TraesCS3B02G544700	black	Seedling	AT3G01090	KIN10	SNF1-related protein kinase catalytic subunit alpha KIN10	LOC_Os03g17980	CAMK_KIN1/SNF1/Nim1_like_AMPKh.2 - CAMK includes calcium/calmodulin depedent protein kinases
TraesCS3D02G148000	black	Seedling	AT1G53210		sodium/calcium exchanger family protein / calcium-binding EF hand family protein	LOC_Os01g11414	sodium/calcium exchanger protein
TraesCS7B02G362900	black	Seedling	AT2G34630	SPS3	Solanesyl diphosphate synthase 3%2C chloroplastic/mitochondrial	LOC_Os06g46450	polyprenyl synthetase
TraesCS3B02G100600	black	Seedling	AT1G27980	DPL1	Sphingosine-1-phosphate lyase	LOC_Os01g01080	decarboxylase
TraesCS6B02G252500	black	Seedling	AT4G06536		SPla/RYanodine receptor (SPRY) domain-containing protein	LOC_Os02g40110	expressed protein
TraesCS5D02G012300	black	Seedling	AT1G11680	CYP51G1	Sterol 14-demethylase	LOC_Os05g34325	cytochrome P450 51
TraesCS5D02G012000	black	Seedling	AT1G11680	CYP51G1	Sterol 14-demethylase	LOC_Os05g34325	cytochrome P450 51
TraesCS5A02G004700	black	Seedling	AT1G11680	CYP51G1	Sterol 14-demethylase	LOC_Os05g34325	cytochrome P450 51
TraesCS3A02G225100	black	Shared	AT5G24030	SLAH3	S-type anion channel SLAH3	LOC_Os01g43460	C4-dicarboxylate transporter/malic acid transport protein
TraesCS3B02G254700	black	Shared	AT5G24030	SLAH3	S-type anion channel SLAH3	LOC_Os01g43460	C4-dicarboxylate transporter/malic acid transport protein
TraesCS1A02G127500	black	Seedling	AT5G24030	SLAH3	S-type anion channel SLAH3	LOC_Os01g28840	C4-dicarboxylate transporter/malic acid transport protein
TraesCS3D02G228400	black	Shared	AT5G24030	SLAH3	S-type anion channel SLAH3	LOC_Os01g43460	C4-dicarboxylate transporter/malic acid transport protein
TraesCS1B02G434100	black	Shared	AT4G10550		Subtilase family protein	LOC_Os01g58240	OsSub6 - Putative Subtilisin homologue
TraesCS6B02G041200	black	Shared	AT4G10540		Subtilase family protein	LOC_Os01g58290	OsSub9 - Putative Subtilisin homologue
TraesCS3A02G284000	black	Germination	AT5G45650		subtilase family protein	LOC_Os01g52750	OsSub3 - Putative Subtilisin homologue
TraesCS3B02G356700	black	Shared	AT4G10540		Subtilase family protein	LOC_Os01g58290	OsSub9 - Putative Subtilisin homologue
TraesCS5B02G036600	black	Seedling	AT4G10520		Subtilase family protein	LOC_Os04g03050	OsSub34 - Putative Subtilisin homologue
TraesCS6D02G319900	black	Shared	AT3G14067		Subtilase family protein	LOC_Os02g53860	OsSub22 - Putative Subtilisin homologue
TraesCS2A02G168200	black	Shared	AT3G43190	SUS4	Sucrose synthase 4	LOC_Os07g42490	sucrose synthase
TraesCS6D02G403800	black	Shared	AT1G73370	SUS6	Sucrose synthase 6	LOC_Os03g28330	sucrose synthase
TraesCSU02G082000	black	Seedling	AT1G73370	SUS6	Sucrose synthase 6	LOC_Os07g42490	sucrose synthase
TraesCS4A02G066200	black	Shared	AT5G26340	STP13	Sugar transport protein 13	LOC_Os03g11900	transporter family protein
TraesCS7A02G085900	black	Seedling	AT5G61520	STP3	Sugar transport protein 3	LOC_Os06g04900	transporter family protein
TraesCS2A02G478600	black	Seedling	AT1G34580	STP5	Sugar transport protein 5	LOC_Os02g36490	expressed protein
TraesCS1B02G435900	black	Seedling	AT1G19450		Sugar transporter ERD6-like 4	LOC_Os05g49270	transporter family protein
TraesCS4B02G339800	black	Seedling	AT1G19450		Sugar transporter ERD6-like 4	LOC_Os05g49270	transporter family protein
TraesCS1B02G448300	black	Seedling	AT1G75220		Sugar transporter ERD6-like 6	LOC_Os05g50280	transporter family protein
TraesCS4B02G264100	black	Shared	AT5G10180	SULTR2%3B1	Sulfate transporter 2.1	LOC_Os03g09940	sulfate transporter
TraesCS5B02G163700	black	No DEG	AT5G13550	SULTR4%3B1	Sulfate transporter 4.1%2C chloroplastic	LOC_Os09g06499	sulfate transporter 4.1
TraesCS5D02G191500	black	Seedling	AT2G25737		Sulfite exporter TauE/SafE family protein	LOC_Os09g17600	membrane protein
TraesCS2D02G123300	black	Seedling	AT1G08830	CSD1	Superoxide dismutase	LOC_Os03g22810	copper/zinc superoxide dismutase
TraesCS1D02G216600	black	Seedling	AT1G24510	CCT5	T-complex protein 1 subunit epsilon	LOC_Os06g36700	T-complex protein
TraesCS3D02G533700	black	Seedling	AT3G46590	TRP2	Telomere repeat-binding protein 2	LOC_Os02g57270	MYB family transcription factor
TraesCS3B02G597500	black	Seedling	AT5G13820	TRP4	Telomere repeat-binding protein 4	LOC_Os02g57270	MYB family transcription factor
TraesCS4A02G096700	black	Seedling	AT1G07540	TRP5	Telomere repeat-binding protein 5	LOC_Os03g16700	initiator-binding protein
TraesCS3A02G528500	black	Seedling	AT1G07540	TRP5	Telomere repeat-binding protein 5	LOC_Os02g57270	MYB family transcription factor
TraesCS6B02G287200	black	Seedling	AT2G37400		Tetratricopeptide repeat (TPR)-like superfamily protein	LOC_Os02g45880	expressed protein
TraesCS6A02G005700	black	Seedling	AT5G66170	STR18	Thiosulfate sulfurtransferase 18	LOC_Os12g24020	rhodanese-like domain containing protein
TraesCS7D02G298800	black	Seedling	AT1G33230		TMPIT-like protein	LOC_Os08g05660	expressed protein
TraesCS5B02G262500	black	Seedling	AT5G47560	TDT	Tonoplast dicarboxylate transporter	LOC_Os09g31130	citrate transporter
TraesCS3D02G179800	black	No DEG	AT3G16830	TPR2	Topless-related protein 2	LOC_Os01g15020	lissencephaly type-1-like homology motif
TraesCS4B02G222300	black	Seedling	AT4G12610	RAP74	transcription activators%3BDNA binding%3BRNA polymerase II transcription factors%3Bcatalytics%3Btranscription initiation factors	LOC_Os10g10990	transcription initiation factor IIF
TraesCS3D02G388700	black	Shared	AT1G05805	BHLH128	Transcription factor bHLH128	LOC_Os01g67480	helix-loop-helix DNA-binding domain containing protein
TraesCS3B02G284800	black	Shared	AT4G16430	BHLH3	Transcription factor bHLH3	LOC_Os01g50940	helix-loop-helix DNA-binding domain containing protein
TraesCS2D02G163900	black	Seedling	AT3G47640	BHLH47	Transcription factor bHLH47	LOC_Os07g43530	helix-loop-helix DNA-binding domain containing protein
TraesCS5D02G390700	black	Seedling	AT5G43650	BHLH92	Transcription factor bHLH92	LOC_Os03g53020	helix-loop-helix DNA-binding domain containing protein
TraesCS3B02G117300	black	Seedling	AT5G58470	TAF15B	Transcription initiation factor TFIID subunit 15b	LOC_Os01g07070	transposon protein
TraesCS2B02G099700	black	Seedling	AT5G05570		transducin family protein / WD-40 repeat family protein	LOC_Os07g49300	expressed protein
TraesCS5B02G068600	black	Seedling	AT3G18950		Transducin/WD40 repeat-like superfamily protein	LOC_Os12g40260	WD-40 repeat family protein
TraesCS2D02G168500	black	Seedling	AT1G78070		Transducin/WD40 repeat-like superfamily protein	LOC_Os03g26870	WD-40 repeat family protein
TraesCS2B02G187400	black	Seedling	AT1G78070		Transducin/WD40 repeat-like superfamily protein	LOC_Os03g26870	WD-40 repeat family protein
TraesCS6B02G382000	black	Seedling	AT2G41190		Transmembrane amino acid transporter family protein	LOC_Os02g54730	transmembrane amino acid transporter protein
TraesCS3A02G346700	black	Seedling	AT3G30390		Transmembrane amino acid transporter family protein	LOC_Os01g61044	transmembrane amino acid transporter protein
TraesCS6D02G331400	black	Seedling	AT2G41190		Transmembrane amino acid transporter family protein	LOC_Os02g54730	transmembrane amino acid transporter protein
TraesCS6A02G348400	black	Seedling	AT2G41190		Transmembrane amino acid transporter family protein	LOC_Os02g54730	transmembrane amino acid transporter protein
TraesCS1A02G183000	black	Seedling	AT4G24040	TRE1	Trehalase	LOC_Os10g37660	trehalase precursor
TraesCS1D02G072600	black	Shared	AT5G01380	GT-3A	Trihelix transcription factor GT-3a	LOC_Os05g03740	transcription factor TF2
TraesCS1B02G463100	black	Shared	AT4G02610	TRPA1	Tryptophan synthase alpha chain	LOC_Os07g08430	indole-3-glycerol phosphate lyase
TraesCS7A02G308600	black	Seedling	AT4G27070	TSB2	Tryptophan synthase beta chain 2%2C chloroplastic	LOC_Os08g04180	tryptophan synthase beta chain 1
TraesCS7D02G305300	black	Seedling	AT4G27070	TSB2	Tryptophan synthase beta chain 2%2C chloroplastic	LOC_Os08g04180	tryptophan synthase beta chain 1
TraesCS3B02G135900	black	Seedling	AT2G36960	TKI1	TSL-kinase interacting protein 1	LOC_Os01g08680	myb/SANT domain protein
TraesCS3D02G118700	black	Seedling	AT2G36960	TKI1	TSL-kinase interacting protein 1	LOC_Os01g08680	myb/SANT domain protein
TraesCS2D02G584900	black	Seedling	AT1G76900	TULP1	Tubby-like F-box protein 1	LOC_Os08g01290	OsFBT12 - F-box and tubby domain containing protein
TraesCS2A02G574000	black	Seedling	AT1G25280	TULP10	Tubby-like F-box protein 10	LOC_Os08g01290	OsFBT12 - F-box and tubby domain containing protein
TraesCS2B02G613800	black	Seedling	AT1G25280	TULP10	Tubby-like F-box protein 10	LOC_Os08g01290	OsFBT12 - F-box and tubby domain containing protein
TraesCS3A02G270800	black	Seedling	AT1G53320	TULP7	Tubby-like F-box protein 7	LOC_Os01g48370	OsFBT1 - F-box and tubby domain containing protein
TraesCS1A02G333900	black	Seedling	AT1G53320	TULP7	Tubby-like F-box protein 7	LOC_Os05g43850	OsFBT9 - F-box and tubby domain containing protein
TraesCS3D02G270500	black	Seedling	AT1G53320	TULP7	Tubby-like F-box protein 7	LOC_Os01g48370	OsFBT1 - F-box and tubby domain containing protein
TraesCS6B02G153500	black	Seedling	AT1G72300	PSYR1	Tyrosine-sulfated glycopeptide receptor 1	LOC_Os02g06070	phytosulfokine receptor precursor
TraesCS6A02G124300	black	Shared	AT1G72300	PSYR1	Tyrosine-sulfated glycopeptide receptor 1	LOC_Os02g05910	phytosulfokine receptor precursor
TraesCS6A02G125400	black	Germination	AT1G72300	PSYR1	Tyrosine-sulfated glycopeptide receptor 1	LOC_Os02g05950	phytosulfokine receptor precursor
TraesCS2D02G436200	black	No DEG	AT3G22370	AOX1A	Ubiquinol oxidase 1a%2C mitochondrial	LOC_Os04g51160	transposon protein
TraesCS2D02G436700	black	Shared	AT3G22370	AOX1A	Ubiquinol oxidase 1a%2C mitochondrial	LOC_Os04g51150	transposon protein
TraesCS7D02G510900	black	Seedling	AT5G32440		Ubiquitin system component Cue protein	LOC_Os06g43550	expressed protein
TraesCS4A02G180800	black	Seedling	AT2G30110	UBA1	Ubiquitin-activating enzyme E1 1	LOC_Os11g01510	ubiquitin-activating enzyme
TraesCS3D02G189200	black	Seedling	AT3G56740		Ubiquitin-associated (UBA) protein	LOC_Os01g16330	OsRhmbd2 - Putative Rhomboid homologue
TraesCS3A02G439400	black	Seedling	AT5G50870	UBC27	Ubiquitin-conjugating enzyme E2 27	LOC_Os01g70140	ubiquitin-conjugating enzyme E2-22 kDa
TraesCS7A02G343800	black	Shared	AT1G64230	UBC28	Ubiquitin-conjugating enzyme E2 28	LOC_Os02g16040	ubiquitin-conjugating enzyme
TraesCS7D02G335800	black	Shared	AT1G64230	UBC28	Ubiquitin-conjugating enzyme E2 28	LOC_Os02g16040	ubiquitin-conjugating enzyme
TraesCS7B02G239300	black	Seedling	AT1G64230	UBC28	Ubiquitin-conjugating enzyme E2 28	LOC_Os02g16040	ubiquitin-conjugating enzyme
TraesCS1B02G420600	black	Seedling	AT1G16890	UBC36	Ubiquitin-conjugating enzyme E2 36	LOC_Os01g48280	ubiquitin-conjugating enzyme
TraesCS3B02G250900	black	Seedling	AT5G45900	ATG7	Ubiquitin-like modifier-activating enzyme atg7	LOC_Os01g42850	ThiF family domain containing protein
TraesCS3D02G231900	black	Seedling	AT5G45900	ATG7	Ubiquitin-like modifier-activating enzyme atg7	LOC_Os01g42850	ThiF family domain containing protein
TraesCS5D02G204700	black	Shared	AT1G60190	PUB19	U-box domain-containing protein 19	LOC_Os09g21120	armadillo/beta-catenin repeat family protein
TraesCS5B02G197400	black	Shared	AT1G60190	PUB19	U-box domain-containing protein 19	LOC_Os09g21120	armadillo/beta-catenin repeat family protein
TraesCS7B02G105600	black	Seedling	AT5G37490	PUB21	U-box domain-containing protein 21	LOC_Os06g13870	U-box protein CMPG1
TraesCS7D02G201600	black	Shared	AT5G37490	PUB21	U-box domain-containing protein 21	LOC_Os06g13870	U-box protein CMPG1
TraesCS6A02G245500	black	Shared	AT2G45910	PUB33	U-box domain-containing protein 33	LOC_Os10g40100	protein kinase
TraesCS3B02G426600	black	Seedling	AT1G27910	PUB45	U-box domain-containing protein 45	LOC_Os01g67500	armadillo/beta-catenin repeat family protein
TraesCS7A02G233400	black	Seedling	AT1G67530	PUB7	U-box domain-containing protein 7	LOC_Os06g28590	bg55
TraesCS3A02G220400	black	Seedling	AT3G15010	UBA2C	UBP1-associated protein 2C	LOC_Os01g42820	RNA recognition motif containing protein
TraesCS4B02G271800	black	Shared	AT2G32300	UCC1	uclacyanin 1	LOC_Os09g39940	plastocyanin-like domain containing protein
TraesCS3B02G013100	black	Shared	AT4G01070	UGT72B1	UDP-glycosyltransferase 72B1	LOC_Os11g38650	UDP-glucoronosyl/UDP-glucosyl transferase
TraesCS2B02G428700	black	No DEG	AT2G15490	UGT73B4	UDP-glycosyltransferase 73B4	LOC_Os04g47770	cis-zeatin O-glucosyltransferase
TraesCS2D02G067600	black	Seedling	AT2G15480	UGT73B5	UDP-glycosyltransferase 73B5	LOC_Os05g42020	UDP-glucoronosyl and UDP-glucosyl transferase domain containing protein
TraesCS5B02G436500	black	Seedling	AT2G15480	UGT73B5	UDP-glycosyltransferase 73B5	LOC_Os01g45110	anthocyanin 3-O-beta-glucosyltransferase
TraesCS5A02G433300	black	Seedling	AT2G15480	UGT73B5	UDP-glycosyltransferase 73B5	LOC_Os01g45110	anthocyanin 3-O-beta-glucosyltransferase
TraesCS2A02G073500	black	Seedling	AT1G05675	UGT74E1	UDP-glycosyltransferase 74E1	LOC_Os04g12980	UDP-glucoronosyl/UDP-glucosyl transferase
TraesCS5A02G149600	black	Seedling	AT1G05675	UGT74E1	UDP-glycosyltransferase 74E1	LOC_Os04g12970	UDP-glucoronosyl/UDP-glucosyl transferase
TraesCS7D02G439400	black	Shared	AT4G15550	UGT75D1	UDP-glycosyltransferase 75D1	LOC_Os02g10880	UDP-glucoronosyl and UDP-glucosyl transferase domain containing protein
TraesCS5D02G140900	black	Seedling	AT4G15550	UGT75D1	UDP-glycosyltransferase 75D1	LOC_Os11g04860	anthocyanin 5-O-glucosyltransferase
TraesCS4B02G226700	black	Seedling	AT3G02100	UGT83A1	UDP-glycosyltransferase 83A1	LOC_Os10g17489	UDP-glucoronosyl and UDP-glucosyl transferase domain containing protein
TraesCS4D02G311500	black	Seedling	AT1G22360	UGT85A2	UDP-glycosyltransferase 85A2	LOC_Os02g51930	cytokinin-O-glucosyltransferase 2
TraesCS2A02G028700	black	Shared	AT1G22360	UGT85A2	UDP-glycosyltransferase 85A2	LOC_Os02g36830	cytokinin-O-glucosyltransferase 2
TraesCS4B02G314300	black	Shared	AT1G22360	UGT85A2	UDP-glycosyltransferase 85A2	LOC_Os02g51930	cytokinin-O-glucosyltransferase 2
TraesCS2D02G169200	black	Seedling	AT1G22380	UGT85A3	UDP-glycosyltransferase 85A3	LOC_Os07g42970	UDP-glucoronosyl and UDP-glucosyl transferase domain containing protein
TraesCS7D02G405900	black	Seedling	AT1G22370	UGT85A5	UDP-glycosyltransferase 85A5	LOC_Os07g30620	cytokinin-O-glucosyltransferase 2
TraesCS7B02G312200	black	Seedling	AT1G22370	UGT85A5	UDP-glycosyltransferase 85A5	LOC_Os07g30620	cytokinin-O-glucosyltransferase 2
TraesCS7D02G405800	black	Shared	AT1G22370	UGT85A5	UDP-glycosyltransferase 85A5	LOC_Os07g30620	cytokinin-O-glucosyltransferase 2
TraesCS7A02G216000	black	Shared	AT3G16520	UGT88A1	UDP-glycosyltransferase 88A1	LOC_Os06g18140	UDP-glucoronosyl and UDP-glucosyl transferase domain containing protein
TraesCS7D02G217800	black	Seedling	AT3G16520	UGT88A1	UDP-glycosyltransferase 88A1	LOC_Os06g18140	UDP-glucoronosyl and UDP-glucosyl transferase domain containing protein
TraesCS3A02G279600	black	Shared	AT3G16520	UGT88A1	UDP-glycosyltransferase 88A1	LOC_Os01g53420	anthocyanidin 5
TraesCS1D02G350200	black	Seedling	AT3G16520	UGT88A1	UDP-glycosyltransferase 88A1	LOC_Os05g45100	anthocyanidin 5
TraesCS3B02G313700	black	Shared	AT3G16520	UGT88A1	UDP-glycosyltransferase 88A1	LOC_Os01g53420	anthocyanidin 5
TraesCS6B02G177100	black	Seedling	AT5G13210		Uncharacterised conserved protein UCP015417%2C vWA	LOC_Os02g08330	gp176
TraesCS1B02G382100	black	No DEG	AT1G15400		Uncharacterized protein At1g15400	LOC_Os05g46500	expressed protein
TraesCS4D02G083500	black	Shared	AT1G18480		Uncharacterized protein At1g18480	LOC_Os11g15570	Ser/Thr protein phosphatase family protein
TraesCS4A02G230500	black	Seedling	AT1G18480		Uncharacterized protein At1g18480	LOC_Os11g15570	Ser/Thr protein phosphatase family protein
TraesCS4B02G085400	black	Shared	AT1G18480		Uncharacterized protein At1g18480	LOC_Os11g15570	Ser/Thr protein phosphatase family protein
TraesCS1A02G291800	black	Germination	AT4G08330		Uncharacterized protein At4g08330%2C chloroplastic	LOC_Os05g39060	expressed protein
TraesCS2A02G104600	black	Shared	AT5G05190	Y-1	Uncharacterized protein At5g05190	LOC_Os07g48280	expressed protein
TraesCS4D02G263100	black	Seedling	AT1G11755	LEW1	Undecaprenyl pyrophosphate synthetase family protein	LOC_Os03g10080	expressed protein
TraesCS2D02G429900	black	Seedling	AT4G02880		unknown protein%3B BEST Arabidopsis thaliana protein match is: unknown protein (TAIR:AT1G03290.2)%3B Has 30201 Blast hits to 17322 proteins in 780 species: Archae - 12%3B Bacteria - 1396%3B Metazoa - 17338%3B Fungi - 3422%3B Plants - 5037%3B Viruses - 0%3B Other Eu /.../es - 2996 (source: NCBI BLink).	LOC_Os10g16440	CUE domain containing protein
TraesCS2B02G453400	black	Seedling	AT4G02880		unknown protein%3B BEST Arabidopsis thaliana protein match is: unknown protein (TAIR:AT1G03290.2)%3B Has 30201 Blast hits to 17322 proteins in 780 species: Archae - 12%3B Bacteria - 1396%3B Metazoa - 17338%3B Fungi - 3422%3B Plants - 5037%3B Viruses - 0%3B Other Eu /.../es - 2996 (source: NCBI BLink).	LOC_Os10g16440	CUE domain containing protein
TraesCS3B02G438400	black	Seedling	AT1G70100		unknown protein%3B BEST Arabidopsis thaliana protein match is: unknown protein (TAIR:AT1G24160.2)%3B Has 3037 Blast hits to 2309 proteins in 344 species: Archae - 6%3B Bacteria - 672%3B Metazoa - 1089%3B Fungi - 230%3B Plants - 220%3B Viruses - 37%3B Other Eukaryot /.../83 (source: NCBI BLink).	LOC_Os01g66200	expressed protein
TraesCS3A02G489300	black	Seedling	AT5G12340		unknown protein%3B BEST Arabidopsis thaliana protein match is: unknown protein (TAIR:AT1G28190.1)%3B Has 30201 Blast hits to 17322 proteins in 780 species: Archae - 12%3B Bacteria - 1396%3B Metazoa - 17338%3B Fungi - 3422%3B Plants - 5037%3B Viruses - 0%3B Other Eu /.../es - 2996 (source: NCBI BLink).	LOC_Os01g72360	expressed protein
TraesCS3D02G495200	black	Shared	AT5G12340		unknown protein%3B BEST Arabidopsis thaliana protein match is: unknown protein (TAIR:AT1G28190.1)%3B Has 30201 Blast hits to 17322 proteins in 780 species: Archae - 12%3B Bacteria - 1396%3B Metazoa - 17338%3B Fungi - 3422%3B Plants - 5037%3B Viruses - 0%3B Other Eu /.../es - 2996 (source: NCBI BLink).	LOC_Os01g72360	expressed protein
TraesCS3D02G142600	black	Shared	AT3G16330		unknown protein%3B BEST Arabidopsis thaliana protein match is: unknown protein (TAIR:AT1G52140.1)%3B Has 109 Blast hits to 109 proteins in 16 species: Archae - 0%3B Bacteria - 0%3B Metazoa - 0%3B Fungi - 0%3B Plants - 109%3B Viruses - 0%3B Other Eukaryotes - 0 (sou /.../CBI BLink).	LOC_Os01g10180	avr9/Cf-9 rapidly elicited protein 146
TraesCS3B02G160500	black	Seedling	AT3G16330		unknown protein%3B BEST Arabidopsis thaliana protein match is: unknown protein (TAIR:AT1G52140.1)%3B Has 109 Blast hits to 109 proteins in 16 species: Archae - 0%3B Bacteria - 0%3B Metazoa - 0%3B Fungi - 0%3B Plants - 109%3B Viruses - 0%3B Other Eukaryotes - 0 (sou /.../CBI BLink).	LOC_Os01g10180	avr9/Cf-9 rapidly elicited protein 146
TraesCS4A02G259000	black	Seedling	AT4G39235		unknown protein%3B BEST Arabidopsis thaliana protein match is: unknown protein (TAIR:AT3G05570.1)%3B Has 30201 Blast hits to 17322 proteins in 780 species: Archae - 12%3B Bacteria - 1396%3B Metazoa - 17338%3B Fungi - 3422%3B Plants - 5037%3B Viruses - 0%3B Other Eu /.../es - 2996 (source: NCBI BLink).	LOC_Os08g10400	expressed protein
TraesCS3B02G247700	black	Seedling	AT5G63350		unknown protein%3B BEST Arabidopsis thaliana protein match is: unknown protein (TAIR:AT3G48510.1)%3B Has 103 Blast hits to 102 proteins in 13 species: Archae - 0%3B Bacteria - 0%3B Metazoa - 2%3B Fungi - 0%3B Plants - 101%3B Viruses - 0%3B Other Eukaryotes - 0 (sou /.../CBI BLink).	LOC_Os12g13910	expressed protein
TraesCS3D02G219400	black	Shared	AT5G63350		unknown protein%3B BEST Arabidopsis thaliana protein match is: unknown protein (TAIR:AT3G48510.1)%3B Has 103 Blast hits to 102 proteins in 13 species: Archae - 0%3B Bacteria - 0%3B Metazoa - 2%3B Fungi - 0%3B Plants - 101%3B Viruses - 0%3B Other Eukaryotes - 0 (sou /.../CBI BLink).	LOC_Os12g13910	expressed protein
TraesCS6A02G011600	black	Seedling	AT4G25690		unknown protein%3B BEST Arabidopsis thaliana protein match is: unknown protein (TAIR:AT4G25670.2)%3B Has 73 Blast hits to 60 proteins in 13 species: Archae - 0%3B Bacteria - 2%3B Metazoa - 4%3B Fungi - 0%3B Plants - 67%3B Viruses - 0%3B Other Eukaryotes - 0 (source /.../ BLink).	LOC_Os02g01360	OsMADS60 - MADS-box family gene with MIKCc type-box
TraesCS2B02G299100	black	Shared	AT5G47920		unknown protein%3B BEST Arabidopsis thaliana protein match is: unknown protein (TAIR:AT5G13880.1)%3B Has 1807 Blast hits to 1807 proteins in 277 species: Archae - 0%3B Bacteria - 0%3B Metazoa - 736%3B Fungi - 347%3B Plants - 385%3B Viruses - 0%3B Other Eukaryotes - /.../source: NCBI BLink).	LOC_Os04g31350	expressed protein
TraesCS5A02G456300	black	Shared	AT3G03870		unknown protein%3B BEST Arabidopsis thaliana protein match is: unknown protein (TAIR:AT5G18130.1)%3B Has 47 Blast hits to 47 proteins in 13 species: Archae - 0%3B Bacteria - 0%3B Metazoa - 2%3B Fungi - 0%3B Plants - 45%3B Viruses - 0%3B Other Eukaryotes - 0 (source /.../ BLink).	LOC_Os03g59180	expressed protein
TraesCS3D02G099400	black	Seedling	AT2G40390		unknown protein%3B BEST Arabidopsis thaliana protein match is: unknown protein (TAIR:AT5G64190.1)%3B Has 75 Blast hits to 75 proteins in 11 species: Archae - 0%3B Bacteria - 0%3B Metazoa - 0%3B Fungi - 0%3B Plants - 74%3B Viruses - 0%3B Other Eukaryotes - 1 (source /.../ BLink).	LOC_Os01g07130	expressed protein
TraesCS3B02G115300	black	Seedling	AT2G40390		unknown protein%3B BEST Arabidopsis thaliana protein match is: unknown protein (TAIR:AT5G64190.1)%3B Has 75 Blast hits to 75 proteins in 11 species: Archae - 0%3B Bacteria - 0%3B Metazoa - 0%3B Fungi - 0%3B Plants - 74%3B Viruses - 0%3B Other Eukaryotes - 1 (source /.../ BLink).	LOC_Os01g07130	expressed protein
TraesCS5A02G232500	black	No DEG	AT1G05575		unknown protein%3B FUNCTIONS IN: molecular_function unknown%3B INVOLVED IN: anaerobic respiration%3B LOCATED IN: endomembrane system%3B EXPRESSED IN: 17 plant structures%3B EXPRESSED DURING: 9 growth stages%3B BEST Arabidopsis thaliana protein match is: unknown /.../in (TAIR:AT2G31945.1)%3B Has 63 Blast hits to 63 proteins in 10 species: Archae - 0%3B Bacteria - 0%3B Metazoa - 0%3B Fungi - 0%3B P…	LOC_Os09g27410	expressed protein
TraesCS1A02G281000	black	Shared	AT3G55646		unknown protein%3B FUNCTIONS IN: molecular_function unknown%3B INVOLVED IN: biological_process unknown%3B LOCATED IN: chloroplast%3B BEST Arabidopsis thaliana protein match is: unknown protein (TAIR:AT2G39855.2)%3B Has 35333 Blast hits to 34131 proteins in 24 /.../cies: Archae - 798%3B Bacteria - 22429%3B Metazoa - 974%3B Fungi - 991%3B Plants - 531%3B Viruses - 0%3B Other Eukaryotes - 9610 (sour…	LOC_Os05g38040	expressed protein
TraesCS1B02G290000	black	Shared	AT3G55646		unknown protein%3B FUNCTIONS IN: molecular_function unknown%3B INVOLVED IN: biological_process unknown%3B LOCATED IN: chloroplast%3B BEST Arabidopsis thaliana protein match is: unknown protein (TAIR:AT2G39855.2)%3B Has 35333 Blast hits to 34131 proteins in 24 /.../cies: Archae - 798%3B Bacteria - 22429%3B Metazoa - 974%3B Fungi - 991%3B Plants - 531%3B Viruses - 0%3B Other Eukaryotes - 9610 (sour…	LOC_Os05g38040	expressed protein
TraesCS2D02G407100	black	Shared	AT1G01730		unknown protein%3B FUNCTIONS IN: molecular_function unknown%3B INVOLVED IN: biological_process unknown%3B LOCATED IN: chloroplast%3B EXPRESSED IN: 23 plant structures%3B EXPRESSED DURING: 13 growth stages%3B Has 42 Blast hits to 42 proteins in 17 species: Archa /.../ Bacteria - 2%3B Metazoa - 5%3B Fungi - 1%3B Plants - 34%3B Viruses - 0%3B Other Eukaryotes - 0 (source: NCBI BLink).	LOC_Os04g47010	expressed protein
TraesCS1A02G116900	black	Shared	AT3G15630		unknown protein%3B FUNCTIONS IN: molecular_function unknown%3B INVOLVED IN: biological_process unknown%3B LOCATED IN: chloroplast%3B EXPRESSED IN: 24 plant structures%3B EXPRESSED DURING: 15 growth stages%3B BEST Arabidopsis thaliana protein match is: unknown p /.../ (TAIR:AT1G52720.1)%3B Has 61 Blast hits to 61 proteins in 13 species: Archae - 0%3B Bacteria - 0%3B Metazoa - 0%3B Fungi - 0%3B Pla…	LOC_Os05g08420	expressed protein
TraesCS3B02G146300	black	Shared	AT3G15630		unknown protein%3B FUNCTIONS IN: molecular_function unknown%3B INVOLVED IN: biological_process unknown%3B LOCATED IN: chloroplast%3B EXPRESSED IN: 24 plant structures%3B EXPRESSED DURING: 15 growth stages%3B BEST Arabidopsis thaliana protein match is: unknown p /.../ (TAIR:AT1G52720.1)%3B Has 61 Blast hits to 61 proteins in 13 species: Archae - 0%3B Bacteria - 0%3B Metazoa - 0%3B Fungi - 0%3B Pla…	LOC_Os01g07970	expressed protein
TraesCS5D02G443500	black	Seedling	AT1G55475		unknown protein%3B FUNCTIONS IN: molecular_function unknown%3B INVOLVED IN: biological_process unknown%3B LOCATED IN: endomembrane system%3B BEST Arabidopsis thaliana protein match is: unknown protein (TAIR:AT3G13480.1)%3B Has 35333 Blast hits to 34131 protei /.../2444 species: Archae - 798%3B Bacteria - 22429%3B Metazoa - 974%3B Fungi - 991%3B Plants - 531%3B Viruses - 0%3B Other Eukaryotes - 96…	LOC_Os03g58090	expressed protein
TraesCS5A02G144700	black	No DEG	AT5G01015		unknown protein%3B FUNCTIONS IN: molecular_function unknown%3B INVOLVED IN: biological_process unknown%3B LOCATED IN: endomembrane system%3B EXPRESSED IN: 23 plant structures%3B EXPRESSED DURING: 13 growth stages%3B BEST Arabidopsis thaliana protein match is: u /.../ protein (TAIR:AT1G65295.1)%3B Has 30201 Blast hits to 17322 proteins in 780 species: Archae - 12%3B Bacteria - 1396%3B Metazoa - 17…	LOC_Os12g02800	CRP11 - Cysteine-rich family protein precursor
TraesCS2A02G025300	black	No DEG	AT5G47020		unknown protein%3B FUNCTIONS IN: molecular_function unknown%3B INVOLVED IN: biological_process unknown%3B LOCATED IN: endomembrane system%3B EXPRESSED IN: 23 plant structures%3B EXPRESSED DURING: 13 growth stages%3B BEST Arabidopsis thaliana protein match is: u /.../ protein (TAIR:AT5G11700.2)%3B Has 1807 Blast hits to 1807 proteins in 277 species: Archae - 0%3B Bacteria - 0%3B Metazoa - 736%3B F…	LOC_Os04g10380	glycine-rich protein
TraesCS6B02G353600	black	Shared	AT2G31945		unknown protein%3B FUNCTIONS IN: molecular_function unknown%3B INVOLVED IN: biological_process unknown%3B LOCATED IN: endomembrane system%3B EXPRESSED IN: 8 plant structures%3B EXPRESSED DURING: 4 anthesis%2C petal differentiation and expansion stage%3B BEST Arab /.../s thaliana protein match is: unknown protein (TAIR:AT1G05575.1)%3B Has 61 Blast hits to 61 proteins in 10 species: Archae - 0%3B B…	LOC_Os02g53410	expressed protein
TraesCS6A02G323000	black	Seedling	AT2G31945		unknown protein%3B FUNCTIONS IN: molecular_function unknown%3B INVOLVED IN: biological_process unknown%3B LOCATED IN: endomembrane system%3B EXPRESSED IN: 8 plant structures%3B EXPRESSED DURING: 4 anthesis%2C petal differentiation and expansion stage%3B BEST Arab /.../s thaliana protein match is: unknown protein (TAIR:AT1G05575.1)%3B Has 61 Blast hits to 61 proteins in 10 species: Archae - 0%3B B…	LOC_Os02g53410	expressed protein
TraesCS6D02G302800	black	Shared	AT2G31945		unknown protein%3B FUNCTIONS IN: molecular_function unknown%3B INVOLVED IN: biological_process unknown%3B LOCATED IN: endomembrane system%3B EXPRESSED IN: 8 plant structures%3B EXPRESSED DURING: 4 anthesis%2C petal differentiation and expansion stage%3B BEST Arab /.../s thaliana protein match is: unknown protein (TAIR:AT1G05575.1)%3B Has 61 Blast hits to 61 proteins in 10 species: Archae - 0%3B B…	LOC_Os02g53410	expressed protein
TraesCS7B02G381900	black	Seedling	AT2G18690		unknown protein%3B FUNCTIONS IN: molecular_function unknown%3B INVOLVED IN: biological_process unknown%3B LOCATED IN: membrane%3B EXPRESSED IN: 17 plant structures%3B EXPRESSED DURING: 9 growth stages%3B CONTAINS InterPro DOMAIN/s: Protein of unknown function D /.../(InterPro:IPR010380)%3B BEST Arabidopsis thaliana protein match is: unknown protein (TAIR:AT2G18680.1)%3B Has 213 Blast hits to 211 …	LOC_Os09g04310	expressed protein
TraesCS5D02G410700	black	Seedling	AT5G43150		unknown protein%3B FUNCTIONS IN: molecular_function unknown%3B INVOLVED IN: biological_process unknown%3B LOCATED IN: mitochondrion%3B EXPRESSED IN: 22 plant structures%3B EXPRESSED DURING: 13 growth stages%3B Has 1807 Blast hits to 1807 proteins in 277 species /.../ae - 0%3B Bacteria - 0%3B Metazoa - 736%3B Fungi - 347%3B Plants - 385%3B Viruses - 0%3B Other Eukaryotes - 339 (source: NCBI BLink).	LOC_Os07g02460	expressed protein
TraesCS2A02G318600	black	Seedling	AT2G14095		unknown protein%3B FUNCTIONS IN: molecular_function unknown%3B INVOLVED IN: biological_process unknown%3B LOCATED IN: mitochondrion%3B EXPRESSED IN: 7 plant structures%3B EXPRESSED DURING: 4 anthesis%2C C globular stage%2C petal differentiation and expansion stag /.../ 106 Blast hits to 103 proteins in 21 species: Archae - 0%3B Bacteria - 5%3B Metazoa - 0%3B Fungi - 4%3B Plants - 87%3B Viruses - …	LOC_Os04g37760	expressed protein
TraesCS7D02G357200	black	Shared	AT1G22750		unknown protein%3B FUNCTIONS IN: molecular_function unknown%3B INVOLVED IN: biological_process unknown%3B LOCATED IN: vacuole%3B EXPRESSED IN: 23 plant structures%3B EXPRESSED DURING: 15 growth stages%3B CONTAINS InterPro DOMAIN/s: Protein of unknown function D /.../ (InterPro:IPR009943)%3B Has 185 Blast hits to 155 proteins in 21 species: Archae - 0%3B Bacteria - 8%3B Metazoa - 3%3B Fungi - 0%3B…	LOC_Os06g38320	expressed protein
TraesCS7A02G365200	black	Seedling	AT1G22750		unknown protein%3B FUNCTIONS IN: molecular_function unknown%3B INVOLVED IN: biological_process unknown%3B LOCATED IN: vacuole%3B EXPRESSED IN: 23 plant structures%3B EXPRESSED DURING: 15 growth stages%3B CONTAINS InterPro DOMAIN/s: Protein of unknown function D /.../ (InterPro:IPR009943)%3B Has 185 Blast hits to 155 proteins in 21 species: Archae - 0%3B Bacteria - 8%3B Metazoa - 3%3B Fungi - 0%3B…	LOC_Os06g38320	expressed protein
TraesCS5D02G150600	black	Seedling	AT5G50350		unknown protein%3B FUNCTIONS IN: molecular_function unknown%3B INVOLVED IN: response to oxidative stress%3B LOCATED IN: chloroplast%3B EXPRESSED IN: 22 plant structures%3B EXPRESSED DURING: 13 growth stages%3B Has 1807 Blast hits to 1807 proteins in 277 species /.../ae - 0%3B Bacteria - 0%3B Metazoa - 736%3B Fungi - 347%3B Plants - 385%3B Viruses - 0%3B Other Eukaryotes - 339 (source: NCBI BLink).	LOC_Os11g03550	expressed protein
TraesCS6D02G304900	black	Seedling	AT2G32970		unknown protein%3B Has 158 Blast hits to 154 proteins in 73 species: Archae - 0%3B Bacteria - 61%3B Metazoa - 0%3B Fungi - 0%3B Plants - 55%3B Viruses - 28%3B Other Eukaryotes - 14 (source: NCBI BLink).	LOC_Os02g53210	expressed protein
TraesCS6A02G325200	black	Seedling	AT2G32970		unknown protein%3B Has 158 Blast hits to 154 proteins in 73 species: Archae - 0%3B Bacteria - 61%3B Metazoa - 0%3B Fungi - 0%3B Plants - 55%3B Viruses - 28%3B Other Eukaryotes - 14 (source: NCBI BLink).	LOC_Os02g53210	expressed protein
TraesCS6B02G355500	black	Seedling	AT2G32970		unknown protein%3B Has 158 Blast hits to 154 proteins in 73 species: Archae - 0%3B Bacteria - 61%3B Metazoa - 0%3B Fungi - 0%3B Plants - 55%3B Viruses - 28%3B Other Eukaryotes - 14 (source: NCBI BLink).	LOC_Os02g53210	expressed protein
TraesCS6A02G321700	black	Seedling	AT4G33380		unknown protein%3B Has 194 Blast hits to 189 proteins in 23 species: Archae - 0%3B Bacteria - 0%3B Metazoa - 0%3B Fungi - 0%3B Plants - 184%3B Viruses - 0%3B Other Eukaryotes - 10 (source: NCBI BLink).	LOC_Os02g52410	expressed protein
TraesCS1D02G296700	black	Seedling	AT5G57510		unknown protein%3B Has 27 Blast hits to 27 proteins in 9 species: Archae - 0%3B Bacteria - 0%3B Metazoa - 0%3B Fungi - 0%3B Plants - 27%3B Viruses - 0%3B Other Eukaryotes - 0 (source: NCBI BLink).	LOC_Os08g34800	expressed protein
TraesCS4D02G301000	black	Seedling	AT5G66820		unknown protein%3B Has 35333 Blast hits to 34131 proteins in 2444 species: Archae - 798%3B Bacteria - 22429%3B Metazoa - 974%3B Fungi - 991%3B Plants - 531%3B Viruses - 0%3B Other Eukaryotes - 9610 (source: NCBI BLink).	LOC_Os03g08740	expressed protein
TraesCS2D02G192200	black	Shared	AT5G42330		unknown protein%3B Has 35333 Blast hits to 34131 proteins in 2444 species: Archae - 798%3B Bacteria - 22429%3B Metazoa - 974%3B Fungi - 991%3B Plants - 531%3B Viruses - 0%3B Other Eukaryotes - 9610 (source: NCBI BLink).	LOC_Os07g29190	expressed protein
TraesCS4A02G017000	black	Germination	AT2G35290		unknown protein%3B Has 39 Blast hits to 39 proteins in 10 species: Archae - 0%3B Bacteria - 0%3B Metazoa - 0%3B Fungi - 0%3B Plants - 39%3B Viruses - 0%3B Other Eukaryotes - 0 (source: NCBI BLink).	LOC_Os03g07400	expressed protein
TraesCS6B02G077800	black	Shared	AT1G76250		unknown protein%3B INVOLVED IN: biological_process unknown%3B LOCATED IN: endomembrane system%3B EXPRESSED IN: 6 plant structures%3B EXPRESSED DURING: 4 anthesis%2C petal differentiation and expansion stage%3B Has 74 Blast hits to 74 proteins in 16 species: Arc /.../0%3B Bacteria - 0%3B Metazoa - 1%3B Fungi - 0%3B Plants - 69%3B Viruses - 0%3B Other Eukaryotes - 4 (source: NCBI BLink).	LOC_Os02g02730	expressed protein
TraesCS3A02G376400	black	Seedling	AT2G26230		Uricase	LOC_Os01g64520	uricase
TraesCS3B02G408900	black	Seedling	AT2G26230		Uricase	LOC_Os01g64520	uricase
TraesCS3D02G369200	black	Seedling	AT2G26230		Uricase	LOC_Os01g64520	uricase
TraesCS1D02G057300	black	Shared	AT2G36310	URH1	Uridine nucleosidase 1	LOC_Os09g39440	inosine-uridine preferring nucleoside hydrolase family protein
TraesCS2D02G443700	black	Seedling	AT3G51860	CAX3	Vacuolar cation/proton exchanger 3	LOC_Os05g51610	sodium/calcium exchanger protein
TraesCS3B02G597800	black	Shared	AT4G32940	GAMMA-VPE	Vacuolar-processing enzyme gamma-isozyme	LOC_Os01g37910	vacuolar-processing enzyme precursor
TraesCS3B02G597900	black	Shared	AT4G32940	GAMMA-VPE	Vacuolar-processing enzyme gamma-isozyme	LOC_Os01g37910	vacuolar-processing enzyme precursor
TraesCS3D02G534200	black	Shared	AT4G32940	GAMMA-VPE	Vacuolar-processing enzyme gamma-isozyme	LOC_Os01g37910	vacuolar-processing enzyme precursor
TraesCS3A02G528900	black	Seedling	AT4G32940	GAMMA-VPE	Vacuolar-processing enzyme gamma-isozyme	LOC_Os01g37910	vacuolar-processing enzyme precursor
TraesCS7D02G471300	black	Seedling	AT2G14740	VSR3	Vacuolar-sorting receptor 3	LOC_Os11g02464	vacuolar-sorting receptor precursor
TraesCS2A02G105500	black	Seedling	AT2G14740	VSR3	Vacuolar-sorting receptor 3	LOC_Os07g48229	vacuolar-sorting receptor precursor
TraesCS3D02G074700	black	Seedling	AT3G55360	ECR	Very-long-chain enoyl-CoA reductase	LOC_Os01g05670	3-oxo-5-alpha-steroid 4-dehydrogenase
TraesCS7B02G148800	black	Seedling	AT1G21270	WAK2	Wall-associated receptor kinase 2	LOC_Os09g38840	OsWAK90 - OsWAK receptor-like protein kinase
TraesCS6B02G040700	black	Seedling	AT1G21270	WAK2	Wall-associated receptor kinase 2	LOC_Os02g02120	OsWAK11 - OsWAK receptor-like protein kinase
TraesCS5A02G365300	black	Seedling	AT1G21270	WAK2	Wall-associated receptor kinase 2	LOC_Os09g38850	OsWAK91 - OsWAK receptor-like protein kinase
TraesCS5D02G537200	black	Seedling	AT1G21240	WAK3	Wall-associated receptor kinase 3	LOC_Os10g09620	OsWAK108 - OsWAK receptor-like protein kinase
TraesCS1A02G011900	black	Germination	AT1G21240	WAK3	Wall-associated receptor kinase 3	LOC_Os10g02720	OsWAK99 - OsWAK receptor-like protein kinase
TraesCS7A02G242800	black	Seedling	AT1G21230	WAK5	Wall-associated receptor kinase 5	LOC_Os08g39180	OsWAK73 - OsWAK receptor-like protein kinase
TraesCS5A02G261200	black	Seedling	AT1G21230	WAK5	Wall-associated receptor kinase 5	LOC_Os09g29560	OsWAK83 - OsWAK pseudogene
TraesCS2B02G536500	black	Germination	AT1G16130	WAKL2	Wall-associated receptor kinase-like 2	LOC_Os04g55760	OsWAK55 - OsWAK receptor-like protein kinase
TraesCS5D02G228500	black	Seedling	AT4G28040		WAT1-related protein At4g28040	LOC_Os09g25770	auxin-induced protein 5NG4
TraesCS5D02G228400	black	Shared	AT4G30420		WAT1-related protein At4g30420	LOC_Os09g25810	nodulin
TraesCS5B02G424500	black	No DEG	AT2G34730	WAP	WPP domain-associated protein	LOC_Os03g57110	expressed protein
TraesCS2A02G331000	black	Seedling	AT5G56210	WIP2	WPP domain-interacting protein 2	LOC_Os04g39540	expressed protein
TraesCS2B02G351300	black	Shared	AT5G56210	WIP2	WPP domain-interacting protein 2	LOC_Os04g39540	expressed protein
TraesCS2A02G146800	black	Seedling	AT5G49650	XK-2	xylulose kinase-2	LOC_Os07g44660	FGGY family of carbohydrate kinases
TraesCS5B02G317100	black	Seedling	AT5G41940		Ypt/Rab-GAP domain of gyp1p superfamily protein	LOC_Os09g35960	TBC domain containing protein
TraesCS4D02G215000	black	Germination	AT2G29660		zinc finger (C2H2 type) family protein	LOC_Os03g15790	ZOS3-08 - C2H2 zinc finger protein
TraesCS4B02G344100	black	Shared	AT5G60710		Zinc finger (C3HC4-type RING finger) family protein	LOC_Os03g04890	zinc finger family protein
TraesCS5B02G200000	black	Seedling	AT3G28210	SAP12	Zinc finger AN1 domain-containing stress-associated protein 12	LOC_Os09g21710	AN1-like zinc finger domain containing protein
TraesCS5D02G082700	black	Seedling	AT3G19580	AZF2	Zinc finger protein AZF2	LOC_Os12g39400	ZOS12-09 - C2H2 zinc finger protein
TraesCS5B02G076400	black	Seedling	AT3G19580	AZF2	Zinc finger protein AZF2	LOC_Os12g39400	ZOS12-09 - C2H2 zinc finger protein
TraesCS6D02G267100	black	Shared	AT5G48250	COL10	Zinc finger protein CONSTANS-LIKE 10	LOC_Os02g49230	CCT/B-box zinc finger protein
TraesCS1B02G285900	black	Germination	AT3G20880	WIP4	Zinc finger protein WIP4	LOC_Os05g37190	ZOS5-08 - C2H2 zinc finger protein
TraesCS5A02G070600	black	Seedling	AT1G27730	ZAT10	Zinc finger protein ZAT10	LOC_Os12g39400	ZOS12-09 - C2H2 zinc finger protein
TraesCS6D02G082600	black	Seedling	AT1G55910	ZIP11	Zinc transporter 11	LOC_Os03g29850	metal cation transporter
TraesCS6A02G099800	black	Seedling	AT1G55910	ZIP11	Zinc transporter 11	LOC_Os03g29850	metal cation transporter
TraesCS3D02G312900	black	Seedling	AT2G41790	PXM16	Zinc-metallopeptidase%2C peroxisomal	LOC_Os01g57073	insulin-degrading enzyme
TraesCS3B02G304900	black	No DEG
TraesCS4B02G029200	black	No DEG
TraesCS3D02G508900	black	Seedling
TraesCS5B02G372100	black	Seedling
TraesCS2D02G427700	black	No DEG
TraesCS2D02G529200	black	Seedling
TraesCS1D02G287400	black	No DEG
TraesCS4B02G148500	black	No DEG
TraesCS2D02G181200	black	No DEG
TraesCS3B02G386500	black	No DEG
TraesCS4D02G160000	black	No DEG
TraesCS5A02G085700	black	No DEG
TraesCS6B02G136300	black	No DEG
TraesCS5B02G113300	black	Seedling
TraesCS2A02G274900	black	No DEG
TraesCS3D02G536600	black	Seedling
TraesCS2A02G430100	black	No DEG
TraesCS4D02G012500	black	Shared
TraesCS6D02G032226	black	Shared
TraesCS2B02G450800	black	No DEG
TraesCS2B02G556800	black	Seedling
TraesCS1B02G271700	black	No DEG
TraesCS3A02G531300	black	Shared
TraesCS7D02G357900	black	Seedling
TraesCS4A02G405100	black	Shared
TraesCS6B02G383600	black	Shared
TraesCS2A02G513400	black	Seedling
TraesCS5B02G185200	black	No DEG
TraesCS5A02G495000	black	No DEG
TraesCS4A02G147500	black	No DEG
TraesCS1D02G167000	black	No DEG
TraesCS7A02G364800	black	Seedling
TraesCS7D02G375500	black	No DEG
TraesCS7A02G302200	black	No DEG
TraesCS3B02G189700	black	No DEG
TraesCS2B02G515300	black	Seedling
TraesCS7B02G262800	black	Shared
TraesCS7D02G238300	black	No DEG
TraesCS2A02G476000	black	No DEG
TraesCS6D02G076200	black	No DEG
TraesCS4B02G159900	black	No DEG
TraesCS7B02G262300	black	Shared
TraesCS4D02G157300	black	No DEG
TraesCS3A02G531200	black	Germination
TraesCS2A02G329900	black	No DEG
TraesCS7A02G287300	black	Seedling
TraesCS6D02G309700	black	No DEG
TraesCS2D02G515000	black	Seedling
TraesCS2B02G515200	black	Shared
TraesCS1D02G338400	black	No DEG
TraesCS1D02G447000	black	Seedling
TraesCS2B02G259000	black	Seedling
TraesCS7B02G205000	black	No DEG
TraesCS1B02G030800	black	No DEG
TraesCS5A02G147700	black	Seedling
TraesCS1B02G297800	black	No DEG
TraesCS7B02G259400	black	Seedling
TraesCS4B02G014300	black	Seedling
TraesCS5D02G478200	black	Seedling
TraesCS2D02G229100	black	No DEG
TraesCS1D02G134400	black	No DEG
TraesCS5D02G379200	black	Shared
TraesCS4B02G227200	black	No DEG
TraesCS3D02G474500	black	Shared
TraesCS1A02G288400	black	No DEG
TraesCS3A02G402700	black	Germination
TraesCS3A02G066600	black	Seedling
TraesCS3B02G234400	black	Seedling
TraesCS7B02G262700	black	Shared
TraesCS7B02G262400	black	Seedling
TraesCS5A02G083400	black	Seedling
TraesCS4D02G302800	black	Shared
TraesCS6B02G268200	black	No DEG
TraesCS7B02G017100	blue	Germination	AT4G25840	GPP1	(DL)-glycerol-3-phosphatase 1	LOC_Os08g14580	haloacid dehalogenase-like hydrolase domain-containing protein 1A
TraesCS3A02G495800	blue	Germination	AT4G25840	GPP1	(DL)-glycerol-3-phosphatase 1	LOC_Os08g14580	haloacid dehalogenase-like hydrolase domain-containing protein 1A
TraesCS2D02G290800	blue	No DEG	AT5G03650	SBE2.2	1%2C4-alpha-glucan-branching enzyme 2-2%2C chloroplastic/amyloplastic	LOC_Os06g51084	1
TraesCS2A02G293400	blue	Seedling	AT5G03650	SBE2.2	1%2C4-alpha-glucan-branching enzyme 2-2%2C chloroplastic/amyloplastic	LOC_Os06g51084	1
TraesCS4A02G406300	blue	Germination	AT1G60600	ABC4	1%2C4-dihydroxy-2-naphthoate polyprenyltransferase%2C chloroplastic	LOC_Os03g09060	prenyltransferase
TraesCS4B02G305800	blue	Seedling	AT1G60600	ABC4	1%2C4-dihydroxy-2-naphthoate polyprenyltransferase%2C chloroplastic	LOC_Os03g09060	prenyltransferase
TraesCS4D02G304000	blue	Shared	AT1G60600	ABC4	1%2C4-dihydroxy-2-naphthoate polyprenyltransferase%2C chloroplastic	LOC_Os03g09060	prenyltransferase
TraesCS3D02G241000	blue	Germination	AT1G60550	MENB	1%2C4-dihydroxy-2-naphthoyl-CoA synthase%2C peroxisomal	LOC_Os01g47350	enoyl-CoA hydratase/isomerase family protein
TraesCS3B02G268700	blue	Germination	AT1G60550	MENB	1%2C4-dihydroxy-2-naphthoyl-CoA synthase%2C peroxisomal	LOC_Os01g47350	enoyl-CoA hydratase/isomerase family protein
TraesCS6B02G353200	blue	Seedling	AT1G76690	OPR2	12-oxophytodienoate reductase 2	LOC_Os06g11240	12-oxophytodienoate reductase
TraesCS7B02G455300	blue	Germination	AT1G76690	OPR2	12-oxophytodienoate reductase 2	LOC_Os06g11290	12-oxophytodienoate reductase
TraesCS4A02G004900	blue	No DEG	AT4G14210	PDS	15-cis-phytoene desaturase%2C chloroplastic/chromoplastic	LOC_Os03g08570	amine oxidase
TraesCS4D02G299000	blue	No DEG	AT4G14210	PDS	15-cis-phytoene desaturase%2C chloroplastic/chromoplastic	LOC_Os03g08570	amine oxidase
TraesCS5A02G033700	blue	No DEG	AT1G10830	Z-ISO	15-cis-zeta-carotene isomerase%2C chloroplastic	LOC_Os12g21710	nnrU
TraesCS5D02G042000	blue	Germination	AT1G10830	Z-ISO	15-cis-zeta-carotene isomerase%2C chloroplastic	LOC_Os12g21710	nnrU
TraesCS1D02G409700	blue	Seedling	AT5G46420		16S rRNA processing protein RimM family	LOC_Os05g49130	16S rRNA processing protein RimM containing protein
TraesCS1B02G431200	blue	Germination	AT5G46420		16S rRNA processing protein RimM family	LOC_Os05g49130	16S rRNA processing protein RimM containing protein
TraesCS1A02G402100	blue	Shared	AT5G46420		16S rRNA processing protein RimM family	LOC_Os05g49130	16S rRNA processing protein RimM containing protein
TraesCS2B02G348200	blue	No DEG	AT2G03810		18S pre-ribosomal assembly protein gar2-related	LOC_Os04g39240	expressed protein
TraesCS1D02G168900	blue	Germination	AT4G30580	LPAT1	1-acyl-sn-glycerol-3-phosphate acyltransferase 1%2C chloroplastic	LOC_Os10g35390	acyltransferase
TraesCS1B02G117400	blue	No DEG	AT1G77330		1-aminocyclopropane-1-carboxylate oxidase 5	LOC_Os05g05680	1-aminocyclopropane-1-carboxylate oxidase
TraesCS1D02G098100	blue	No DEG	AT1G77330		1-aminocyclopropane-1-carboxylate oxidase 5	LOC_Os05g05680	1-aminocyclopropane-1-carboxylate oxidase
TraesCS1A02G089500	blue	Seedling	AT1G77330		1-aminocyclopropane-1-carboxylate oxidase 5	LOC_Os05g05680	1-aminocyclopropane-1-carboxylate oxidase
TraesCS1A02G089600	blue	Germination	AT1G77330		1-aminocyclopropane-1-carboxylate oxidase 5	LOC_Os05g05680	1-aminocyclopropane-1-carboxylate oxidase
TraesCS1D02G098000	blue	No DEG	AT1G77330		1-aminocyclopropane-1-carboxylate oxidase 5	LOC_Os05g05680	1-aminocyclopropane-1-carboxylate oxidase
TraesCS2B02G040100	blue	No DEG	AT1G06640		1-aminocyclopropane-1-carboxylate oxidase homolog 2	LOC_Os04g10350	1-aminocyclopropane-1-carboxylate oxidase homolog 2
TraesCS2D02G154300	blue	No DEG	AT1G48130	PER1	1-Cys peroxiredoxin PER1	LOC_Os07g44430	peroxiredoxin
TraesCS1B02G266500	blue	Seedling	AT4G15560	DXS	1-deoxy-D-xylulose-5-phosphate synthase%2C chloroplastic	LOC_Os05g33840	transketolase
TraesCS3D02G378500	blue	Shared	AT4G33240	FAB1A	1-phosphatidylinositol-3-phosphate 5-kinase FAB1A	LOC_Os12g13440	phosphatidylinositol-4-phosphate 5-Kinase
TraesCS7B02G066000	blue	No DEG	AT5G20720	CPN21	20 kDa chaperonin%2C chloroplastic	LOC_Os06g09679	chaperonin
TraesCS7A02G161000	blue	No DEG	AT5G20720	CPN21	20 kDa chaperonin%2C chloroplastic	LOC_Os06g09679	chaperonin
TraesCS5A02G212500	blue	No DEG	AT5G20720	CPN21	20 kDa chaperonin%2C chloroplastic	LOC_Os09g26730	chaperonin
TraesCS5D02G219500	blue	No DEG	AT5G20720	CPN21	20 kDa chaperonin%2C chloroplastic	LOC_Os09g26730	chaperonin
TraesCS6D02G320800	blue	Germination	AT5G20720	CPN21	20 kDa chaperonin%2C chloroplastic	LOC_Os02g54060	chaperonin
TraesCS6B02G371500	blue	Germination	AT5G20720	CPN21	20 kDa chaperonin%2C chloroplastic	LOC_Os02g54060	chaperonin
TraesCS6A02G340300	blue	No DEG	AT5G20720	CPN21	20 kDa chaperonin%2C chloroplastic	LOC_Os02g54060	chaperonin
TraesCS1B02G331900	blue	Germination	AT5G54660	HSP21.7	21.7 kDa class VI heat shock protein	LOC_Os05g42120	heat shock protein
TraesCS2D02G295500	blue	Germination	AT5G06290	2-Cys Prx B	2-Cys peroxiredoxin BAS1-like%2C chloroplastic	LOC_Os02g33450	peroxiredoxin
TraesCS2B02G313700	blue	No DEG	AT5G06290	2-Cys Prx B	2-Cys peroxiredoxin BAS1-like%2C chloroplastic	LOC_Os02g33450	peroxiredoxin
TraesCS2A02G297500	blue	No DEG	AT5G06290	2-Cys Prx B	2-Cys peroxiredoxin BAS1-like%2C chloroplastic	LOC_Os02g33450	peroxiredoxin
TraesCS1B02G409300	blue	Germination	AT4G32590		2Fe-2S ferredoxin-like superfamily protein	LOC_Os05g48160	2Fe-2S iron-sulfur cluster binding domain containing protein
TraesCS4D02G025700	blue	No DEG	AT1G32550	FdC1	2Fe-2S ferredoxin-like superfamily protein	LOC_Os03g48040	2Fe-2S iron-sulfur cluster binding domain containing protein
TraesCS4A02G286700	blue	Germination	AT1G32550	FdC1	2Fe-2S ferredoxin-like superfamily protein	LOC_Os03g48040	2Fe-2S iron-sulfur cluster binding domain containing protein
TraesCS4B02G028100	blue	Germination	AT1G32550	FdC1	2Fe-2S ferredoxin-like superfamily protein	LOC_Os03g48040	2Fe-2S iron-sulfur cluster binding domain containing protein
TraesCS5D02G043300	blue	No DEG	AT3G63410	VTE3	2-methyl-6-phytyl-1%2C4-hydroquinone methyltransferase%2C chloroplastic	LOC_Os12g42090	methyltransferase domain containing protein
TraesCS5B02G035200	blue	No DEG	AT3G63410	VTE3	2-methyl-6-phytyl-1%2C4-hydroquinone methyltransferase%2C chloroplastic	LOC_Os12g42090	methyltransferase domain containing protein
TraesCS5A02G035100	blue	Seedling	AT3G63410	VTE3	2-methyl-6-phytyl-1%2C4-hydroquinone methyltransferase%2C chloroplastic	LOC_Os12g42090	methyltransferase domain containing protein
TraesCS4B02G013100	blue	Seedling	AT3G63410	VTE3	2-methyl-6-phytyl-1%2C4-hydroquinone methyltransferase%2C chloroplastic	LOC_Os12g42090	methyltransferase domain containing protein
TraesCS5B02G224800	blue	Germination	AT5G20400		2-oxoglutarate (2OG) and Fe(II)-dependent oxygenase superfamily protein	LOC_Os02g17940	leucoanthocyanidin dioxygenase
TraesCS1A02G221200	blue	No DEG	AT4G25310		2-oxoglutarate (2OG) and Fe(II)-dependent oxygenase superfamily protein	LOC_Os10g41020	flavonol synthase/flavanone 3-hydroxylase
TraesCS6D02G359300	blue	Germination	AT5G20400		2-oxoglutarate (2OG) and Fe(II)-dependent oxygenase superfamily protein	LOC_Os06g07932	flavonol synthase/flavanone 3-hydroxylase
TraesCS1D02G222800	blue	Shared	AT4G25310		2-oxoglutarate (2OG) and Fe(II)-dependent oxygenase superfamily protein	LOC_Os10g41020	flavonol synthase/flavanone 3-hydroxylase
TraesCS3D02G111000	blue	Seedling	AT1G35190		2-oxoglutarate (2OG) and Fe(II)-dependent oxygenase superfamily protein	LOC_Os01g09300	oxidoreductase
TraesCS7A02G159200	blue	Germination	AT4G10490		2-oxoglutarate (2OG) and Fe(II)-dependent oxygenase superfamily protein	LOC_Os07g07410	oxidoreductase
TraesCS3D02G110900	blue	No DEG	AT3G46500		2-oxoglutarate (2OG) and Fe(II)-dependent oxygenase superfamily protein	LOC_Os02g18720	expressed protein
TraesCS1B02G234500	blue	Germination	AT4G25310		2-oxoglutarate (2OG) and Fe(II)-dependent oxygenase superfamily protein	LOC_Os10g41020	flavonol synthase/flavanone 3-hydroxylase
TraesCS1B02G444600	blue	Shared	AT1G52820		2-oxoglutarate (2OG) and Fe(II)-dependent oxygenase superfamily protein	LOC_Os05g50090	oxidoreductase
TraesCS5D02G233600	blue	Germination	AT5G20400		2-oxoglutarate (2OG) and Fe(II)-dependent oxygenase superfamily protein	LOC_Os02g17940	leucoanthocyanidin dioxygenase
TraesCS4D02G002800	blue	Germination	AT2G36690		2-oxoglutarate (2OG) and Fe(II)-dependent oxygenase superfamily protein	LOC_Os08g44590	gibberellin 20 oxidase 2
TraesCS2A02G079500	blue	No DEG	AT5G65750		2-oxoglutarate dehydrogenase%2C E1 component	LOC_Os07g49520	2-oxoglutarate dehydrogenase E1 component
TraesCS2B02G094300	blue	No DEG	AT5G65750		2-oxoglutarate dehydrogenase%2C E1 component	LOC_Os07g49520	2-oxoglutarate dehydrogenase E1 component
TraesCS2D02G076900	blue	Seedling	AT5G65750		2-oxoglutarate dehydrogenase%2C E1 component	LOC_Os07g49520	2-oxoglutarate dehydrogenase E1 component
TraesCS7B02G210000	blue	No DEG	AT1G30520	AAE14	2-succinylbenzoate--CoA ligase%2C chloroplastic/peroxisomal	LOC_Os08g03630	acyl-activating enzyme 14
TraesCS2D02G324900	blue	Germination	AT1G68590		30S ribosomal protein 3-1%2C chloroplastic	LOC_Os04g38750	plastid-specific 30S ribosomal protein 3
TraesCS2B02G343900	blue	No DEG	AT1G68590		30S ribosomal protein 3-1%2C chloroplastic	LOC_Os04g38750	plastid-specific 30S ribosomal protein 3
TraesCS2A02G338100	blue	No DEG	AT1G68590		30S ribosomal protein 3-1%2C chloroplastic	LOC_Os04g38750	plastid-specific 30S ribosomal protein 3
TraesCS4D02G263300	blue	Germination	AT3G13120	RPS10	30S ribosomal protein S10%2C chloroplastic	LOC_Os03g10060	S10/S20 domain containing ribosomal protein
TraesCS4B02G263100	blue	Germination	AT3G13120	RPS10	30S ribosomal protein S10%2C chloroplastic	LOC_Os03g10060	S10/S20 domain containing ribosomal protein
TraesCS4A02G042500	blue	Germination	AT3G13120	RPS10	30S ribosomal protein S10%2C chloroplastic	LOC_Os03g10060	S10/S20 domain containing ribosomal protein
TraesCS3A02G432000	blue	Seedling	ATCG00750	RPS11	30S ribosomal protein S11%2C chloroplastic	LOC_Os04g16838	chloroplast 30S ribosomal protein S11
TraesCS3B02G187600	blue	Seedling	ATCG00750	RPS11	30S ribosomal protein S11%2C chloroplastic	LOC_Os04g16838	chloroplast 30S ribosomal protein S11
TraesCSU02G259800	blue	Seedling	ATCG00750	RPS11	30S ribosomal protein S11%2C chloroplastic	LOC_Os04g16838	chloroplast 30S ribosomal protein S11
TraesCS4B02G398600	blue	Seedling	ATCG00065	rps12-B	30S ribosomal protein S12%2C chloroplastic	LOC_Os12g34062	mitochondrial ribosomal protein S12
TraesCS4B02G041900	blue	No DEG	AT5G14320	RPS13	30S ribosomal protein S13%2C chloroplastic	LOC_Os03g49710	ribosomal protein S13p/S18e
TraesCS4D02G039100	blue	Germination	AT5G14320	RPS13	30S ribosomal protein S13%2C chloroplastic	LOC_Os03g49710	ribosomal protein S13p/S18e
TraesCS4A02G272100	blue	Germination	AT5G14320	RPS13	30S ribosomal protein S13%2C chloroplastic	LOC_Os03g49710	ribosomal protein S13p/S18e
TraesCS4B02G124900	blue	Seedling	ATCG01120	RPS15	30S ribosomal protein S15%2C chloroplastic	LOC_Os04g16728	chloroplast 30S ribosomal protein S15
TraesCSU02G238800	blue	Shared	ATCG01120	RPS15	30S ribosomal protein S15%2C chloroplastic	LOC_Os04g16728	chloroplast 30S ribosomal protein S15
TraesCS5D02G008200	blue	Shared	ATCG00050	RPS16	30S ribosomal protein S16%2C chloroplastic	LOC_Os10g21196	chloroplast 30S ribosomal protein S16
TraesCS2D02G572300	blue	No DEG	AT1G79850	RPS17	30S ribosomal protein S17%2C chloroplastic	LOC_Os04g59494	transportin-2
TraesCS2A02G563100	blue	Shared	AT1G79850	RPS17	30S ribosomal protein S17%2C chloroplastic	LOC_Os04g59494	transportin-2
TraesCS5D02G377000	blue	Seedling	ATCG00650	RPS18	30S ribosomal protein S18%2C chloroplastic	LOC_Os08g15308	chloroplast 30S ribosomal protein S18
TraesCS3D02G053100	blue	Seedling	ATCG00650	RPS18	30S ribosomal protein S18%2C chloroplastic	LOC_Os08g15308	chloroplast 30S ribosomal protein S18
TraesCS1D02G435200	blue	Seedling	ATCG00650	RPS18	30S ribosomal protein S18%2C chloroplastic	LOC_Os08g15308	chloroplast 30S ribosomal protein S18
TraesCSU02G265900	blue	Shared	ATCG00160	RPS2	30S ribosomal protein S2%2C chloroplastic	LOC_Os02g24612	ribosomal protein S2
TraesCS5D02G458600	blue	Seedling	ATCG00160	RPS2	30S ribosomal protein S2%2C chloroplastic	LOC_Os02g24612	ribosomal protein S2
TraesCSU02G174400	blue	Seedling	ATCG00160	RPS2	30S ribosomal protein S2%2C chloroplastic	LOC_Os02g24612	ribosomal protein S2
TraesCS5D02G011400	blue	Shared	ATCG00160	RPS2	30S ribosomal protein S2%2C chloroplastic	LOC_Os02g24612	ribosomal protein S2
TraesCS4B02G245600	blue	Seedling	ATCG00160	RPS2	30S ribosomal protein S2%2C chloroplastic	LOC_Os02g24612	ribosomal protein S2
TraesCS3D02G268700	blue	No DEG	AT3G15190	RPS20	30S ribosomal protein S20%2C chloroplastic	LOC_Os01g48690	ribosomal protein rpS20
TraesCS3B02G303000	blue	No DEG	AT3G15190	RPS20	30S ribosomal protein S20%2C chloroplastic	LOC_Os01g48690	ribosomal protein rpS20
TraesCS3A02G268600	blue	No DEG	AT3G15190	RPS20	30S ribosomal protein S20%2C chloroplastic	LOC_Os01g48690	ribosomal protein rpS20
TraesCS2D02G566300	blue	Seedling	ATCG00800	RPS3	30S ribosomal protein S3%2C chloroplastic	LOC_Os04g16824	chloroplast 30S ribosomal protein S3
TraesCS5D02G456600	blue	Seedling	ATCG00800	RPS3	30S ribosomal protein S3%2C chloroplastic	LOC_Os04g16824	chloroplast 30S ribosomal protein S3
TraesCS3D02G058000	blue	Shared	ATCG00800	RPS3	30S ribosomal protein S3%2C chloroplastic	LOC_Os04g16824	chloroplast 30S ribosomal protein S3
TraesCS3A02G194700	blue	Seedling	ATCG00380	RPS4	30S ribosomal protein S4%2C chloroplastic	LOC_Os04g16738	chloroplast 30S ribosomal protein S4
TraesCS7B02G395700	blue	Shared	ATCG00380	RPS4	30S ribosomal protein S4%2C chloroplastic	LOC_Os04g16738	chloroplast 30S ribosomal protein S4
TraesCS2D02G557000	blue	Germination	ATCG00380	RPS4	30S ribosomal protein S4%2C chloroplastic	LOC_Os04g16738	chloroplast 30S ribosomal protein S4
TraesCS3D02G057700	blue	Seedling	ATCG00380	RPS4	30S ribosomal protein S4%2C chloroplastic	LOC_Os04g16738	chloroplast 30S ribosomal protein S4
TraesCS4B02G164800	blue	Seedling	AT2G33800	RPS5	30S ribosomal protein S5%2C chloroplastic	LOC_Os03g34040	ribosomal protein
TraesCS4A02G167000	blue	Shared	AT2G33800	RPS5	30S ribosomal protein S5%2C chloroplastic	LOC_Os03g34040	ribosomal protein
TraesCS4D02G151500	blue	No DEG	AT2G33800	RPS5	30S ribosomal protein S5%2C chloroplastic	LOC_Os03g34040	ribosomal protein
TraesCS4A02G342800	blue	Germination	AT1G64510	RPS6	30S ribosomal protein S6 alpha%2C chloroplastic	LOC_Os03g62630	ribosomal protein S6
TraesCS5D02G530200	blue	No DEG	AT1G64510	RPS6	30S ribosomal protein S6 alpha%2C chloroplastic	LOC_Os03g62630	ribosomal protein S6
TraesCS5B02G531900	blue	No DEG	AT1G64510	RPS6	30S ribosomal protein S6 alpha%2C chloroplastic	LOC_Os03g62630	ribosomal protein S6
TraesCSU02G238400	blue	Seedling	ATCG00900	RPS7-A	30S ribosomal protein S7%2C chloroplastic	LOC_Os04g16856	chloroplast 30S ribosomal protein S7
TraesCS5D02G457500	blue	Shared	ATCG00900	RPS7-A	30S ribosomal protein S7%2C chloroplastic	LOC_Os04g16856	chloroplast 30S ribosomal protein S7
TraesCS1D02G179100	blue	Seedling	ATCG00900	RPS7-A	30S ribosomal protein S7%2C chloroplastic	LOC_Os04g16856	chloroplast 30S ribosomal protein S7
TraesCS1A02G157100	blue	Seedling	ATCG00900	RPS7-A	30S ribosomal protein S7%2C chloroplastic	LOC_Os04g16856	chloroplast 30S ribosomal protein S7
TraesCSU02G149800	blue	Shared	ATCG00900	RPS7-A	30S ribosomal protein S7%2C chloroplastic	LOC_Os04g16856	chloroplast 30S ribosomal protein S7
TraesCS3B02G013500	blue	Seedling	ATCG00900	RPS7-A	30S ribosomal protein S7%2C chloroplastic	LOC_Os04g16856	chloroplast 30S ribosomal protein S7
TraesCS6D02G375300	blue	No DEG	ATCG00900	RPS7-A	30S ribosomal protein S7%2C chloroplastic	LOC_Os04g16856	chloroplast 30S ribosomal protein S7
TraesCS1B02G406600	blue	Seedling	ATCG00900	RPS7-A	30S ribosomal protein S7%2C chloroplastic	LOC_Os04g16856	chloroplast 30S ribosomal protein S7
TraesCS5D02G559900	blue	Seedling	ATCG00770	RPS8	30S ribosomal protein S8%2C chloroplastic	LOC_Os04g16832	chloroplast 30S ribosomal protein S8
TraesCS4D02G043600	blue	Shared	ATCG00770	RPS8	30S ribosomal protein S8%2C chloroplastic	LOC_Os04g16832	chloroplast 30S ribosomal protein S8
TraesCS5B02G409400	blue	Germination	AT1G74970	RPS9	30S ribosomal protein S9%2C chloroplastic	LOC_Os03g55930	ribosomal protein
TraesCS5D02G414600	blue	Germination	AT1G74970	RPS9	30S ribosomal protein S9%2C chloroplastic	LOC_Os03g55930	ribosomal protein
TraesCS5A02G404500	blue	No DEG	AT1G74970	RPS9	30S ribosomal protein S9%2C chloroplastic	LOC_Os03g55930	ribosomal protein
TraesCS4A02G320200	blue	Seedling	AT5G24490		30S ribosomal protein%2C putative	LOC_Os03g63950	plastid-specific 30S ribosomal protein 1
TraesCS7A02G278300	blue	No DEG	AT4G24770	CP31A	31 kDa ribonucleoprotein%2C chloroplastic	LOC_Os08g44290	RNA recognition motif containing protein
TraesCS5B02G370700	blue	Seedling	AT4G24770	CP31A	31 kDa ribonucleoprotein%2C chloroplastic	LOC_Os09g39180	RNA recognition motif containing protein
TraesCS5A02G368400	blue	Seedling	AT4G24770	CP31A	31 kDa ribonucleoprotein%2C chloroplastic	LOC_Os09g39180	RNA recognition motif containing protein
TraesCS7B02G176100	blue	Germination	AT4G24770	CP31A	31 kDa ribonucleoprotein%2C chloroplastic	LOC_Os08g44290	RNA recognition motif containing protein
TraesCS7D02G278100	blue	No DEG	AT4G24770	CP31A	31 kDa ribonucleoprotein%2C chloroplastic	LOC_Os08g44290	RNA recognition motif containing protein
TraesCS7B02G335300	blue	Seedling	AT4G24770	CP31A	31 kDa ribonucleoprotein%2C chloroplastic	LOC_Os09g39180	RNA recognition motif containing protein
TraesCS5D02G378000	blue	No DEG	AT4G24770	CP31A	31 kDa ribonucleoprotein%2C chloroplastic	LOC_Os09g39180	RNA recognition motif containing protein
TraesCS5B02G302300	blue	No DEG	AT2G26260	3BETAHSD/D2	3beta-hydroxysteroid-dehydrogenase/decarboxylase isoform 2	LOC_Os09g34090	sterol-4-alpha-carboxylate 3-dehydrogenase
TraesCS1D02G401900	blue	Seedling	AT1G53000	KDSB	3-deoxy-manno-octulosonate cytidylyltransferase%2C mitochondrial	LOC_Os05g48750	3-deoxy-manno-octulosonate cytidylyltransferase
TraesCS7D02G350500	blue	Seedling	AT1G01120	KCS1	3-ketoacyl-CoA synthase 1	LOC_Os05g49290	3-ketoacyl-CoA synthase
TraesCS1A02G413400	blue	Germination	AT5G43760	KCS19	3-ketoacyl-CoA synthase 19	LOC_Os02g11070	3-ketoacyl-CoA synthase
TraesCS1A02G406200	blue	No DEG	AT1G25450	KCS5	3-ketoacyl-CoA synthase 5	LOC_Os06g39750	3-ketoacyl-CoA synthase
TraesCS1B02G161300	blue	Seedling	AT2G33150	PED1	3-ketoacyl-CoA thiolase 2%2C peroxisomal	LOC_Os10g31950	3-ketoacyl-CoA thiolase
TraesCS3D02G158500	blue	No DEG	AT2G46110	KPHMT1	3-methyl-2-oxobutanoate hydroxymethyltransferase 1%2C mitochondrial	LOC_Os01g12560	3-methyl-2-oxobutanoate hydroxymethyltransferase
TraesCS2D02G249800	blue	No DEG	AT5G16010		3-oxo-5-alpha-steroid 4-dehydrogenase family protein	LOC_Os07g06800	3-oxo-5-alpha-steroid 4-dehydrogenase
TraesCS2A02G313500	blue	Germination	AT5G46290	KAS1	3-oxoacyl-	LOC_Os04g36800	3-oxoacyl-synthase
TraesCS2B02G332300	blue	Germination	AT5G46290	KAS1	3-oxoacyl-	LOC_Os04g36800	3-oxoacyl-synthase
TraesCS2B02G194700	blue	Seedling	AT1G74960	KAS2	3-oxoacyl-	LOC_Os07g42420	3-oxoacyl-synthase
TraesCS7B02G065500	blue	Seedling	AT5G46290	KAS1	3-oxoacyl-	LOC_Os06g09630	3-oxoacyl-synthase
TraesCSU02G063500	blue	Seedling	AT2G45300		3-phosphoshikimate 1-carboxyvinyltransferase%2C chloroplastic	LOC_Os06g04280	3-phosphoshikimate 1-carboxyvinyltransferase
TraesCS2B02G318500	blue	No DEG	AT5G52650	RPS10C	40S ribosomal protein S10-3	LOC_Os04g35090	40S ribosomal protein S10
TraesCS2D02G421300	blue	No DEG	AT3G48930	RPS11A	40S ribosomal protein S11-1	LOC_Os04g52361	ribosomal protein S17
TraesCS7A02G316200	blue	No DEG	AT3G60770	RPS13A	40S ribosomal protein S13-1	LOC_Os08g02400	40S ribosomal protein S13
TraesCS2B02G312000	blue	No DEG	AT3G52580	RPS14C	40S ribosomal protein S14-3	LOC_Os02g33140	ribosomal protein
TraesCS2A02G295600	blue	No DEG	AT3G52580	RPS14C	40S ribosomal protein S14-3	LOC_Os02g33140	ribosomal protein
TraesCS7B02G355300	blue	No DEG	AT3G52580	RPS14C	40S ribosomal protein S14-3	LOC_Os02g06700	ribosomal protein
TraesCS5D02G451100	blue	No DEG	AT5G09510	RPS15D	40S ribosomal protein S15-4	LOC_Os07g08660	40S ribosomal protein S15
TraesCS5A02G443700	blue	No DEG	AT5G09510	RPS15D	40S ribosomal protein S15-4	LOC_Os07g08660	40S ribosomal protein S15
TraesCS3B02G388800	blue	No DEG	AT1G07770	RPS15AA	40S ribosomal protein S15a-1	LOC_Os02g27760	40S ribosomal protein S15a
TraesCS3D02G349900	blue	No DEG	AT1G07770	RPS15AA	40S ribosomal protein S15a-1	LOC_Os02g27760	40S ribosomal protein S15a
TraesCS5D02G442100	blue	No DEG	AT1G22780	RPS18A	40S ribosomal protein S18	LOC_Os03g58050	ribosomal protein S13p/S18e
TraesCS5A02G170200	blue	No DEG	AT5G61170	RPS19C	40S ribosomal protein S19-3	LOC_Os03g31090	40S ribosomal protein S19
TraesCS7D02G066800	blue	No DEG	AT3G45030	RPS20A	40S ribosomal protein S20-1	LOC_Os06g04290	S10/S20 domain containing ribosomal protein
TraesCS1A02G288800	blue	No DEG	AT5G02960	RPS23B	40S ribosomal protein S23-2	LOC_Os01g61814	40S ribosomal protein S23
TraesCS3D02G347100	blue	No DEG	AT5G02960	RPS23B	40S ribosomal protein S23-2	LOC_Os01g61814	40S ribosomal protein S23
TraesCS7A02G356300	blue	No DEG	AT3G04920	RPS24A	40S ribosomal protein S24-1	LOC_Os02g13530	40S ribosomal protein S24
TraesCS6D02G177000	blue	No DEG	AT3G04920	RPS24A	40S ribosomal protein S24-1	LOC_Os02g13530	40S ribosomal protein S24
TraesCS7D02G366400	blue	No DEG	AT3G04920	RPS24A	40S ribosomal protein S24-1	LOC_Os01g52490	40S ribosomal protein S24
TraesCS7B02G407300	blue	No DEG	AT2G21580	RPS25B	40S ribosomal protein S25-2	LOC_Os09g39540	40S ribosomal protein S25
TraesCS4B02G008900	blue	No DEG	AT2G21580	RPS25B	40S ribosomal protein S25-2	LOC_Os09g39540	40S ribosomal protein S25
TraesCS4A02G307100	blue	No DEG	AT2G21580	RPS25B	40S ribosomal protein S25-2	LOC_Os09g39540	40S ribosomal protein S25
TraesCS7D02G488700	blue	No DEG	AT3G61110	RPS27B	40S ribosomal protein S27-2	LOC_Os04g27860	40S ribosomal protein S27
TraesCS4B02G082600	blue	No DEG	AT3G61110	RPS27B	40S ribosomal protein S27-2	LOC_Os04g27860	40S ribosomal protein S27
TraesCS4A02G022600	blue	No DEG	AT3G61110	RPS27B	40S ribosomal protein S27-2	LOC_Os04g27860	40S ribosomal protein S27
TraesCS3A02G530400	blue	No DEG	AT3G10090	RPS28A	40S ribosomal protein S28-1	LOC_Os10g27174	40S ribosomal protein S28
TraesCS5D02G417000	blue	No DEG	AT3G43980	RPS29A	40S ribosomal protein S29	LOC_Os03g56241	40S ribosomal protein S29
TraesCS5A02G407100	blue	No DEG	AT3G43980	RPS29A	40S ribosomal protein S29	LOC_Os03g56241	40S ribosomal protein S29
TraesCS5A02G105800	blue	No DEG	AT3G43980	RPS29A	40S ribosomal protein S29	LOC_Os03g56241	40S ribosomal protein S29
TraesCS7B02G198400	blue	No DEG	AT5G35530	RPS3C	40S ribosomal protein S3-3	LOC_Os03g38000	40S ribosomal protein S3-1
TraesCS7D02G291300	blue	No DEG	AT5G35530	RPS3C	40S ribosomal protein S3-3	LOC_Os03g38000	40S ribosomal protein S3-1
TraesCS2B02G198400	blue	No DEG	AT5G35530	RPS3C	40S ribosomal protein S3-3	LOC_Os07g41750	40S ribosomal protein S3-1
TraesCS4B02G260600	blue	No DEG	AT4G34670	RPS3AB	40S ribosomal protein S3a-2	LOC_Os12g21798	40S ribosomal protein S3a
TraesCS4D02G260400	blue	Seedling	AT4G34670	RPS3AB	40S ribosomal protein S3a-2	LOC_Os12g21798	40S ribosomal protein S3a
TraesCS1A02G092900	blue	No DEG	AT5G58420	RPS4D	40S ribosomal protein S4-3	LOC_Os02g01560	40S ribosomal protein S4
TraesCS3D02G085600	blue	No DEG	AT2G37270	RPS5A	40S ribosomal protein S5-1	LOC_Os11g29190	40S ribosomal protein S5
TraesCS2B02G078200	blue	No DEG	AT5G10360	RPS6B	40S ribosomal protein S6-2	LOC_Os03g27260	40S ribosomal protein S6
TraesCS2D02G064600	blue	No DEG	AT5G10360	RPS6B	40S ribosomal protein S6-2	LOC_Os03g27260	40S ribosomal protein S6
TraesCS2D02G064500	blue	No DEG	AT5G10360	RPS6B	40S ribosomal protein S6-2	LOC_Os03g27260	40S ribosomal protein S6
TraesCS4A02G114100	blue	No DEG	AT1G48830	RPS7A	40S ribosomal protein S7-1	LOC_Os03g18570	40S ribosomal protein S7
TraesCS4B02G190000	blue	No DEG	AT1G48830	RPS7A	40S ribosomal protein S7-1	LOC_Os03g18570	40S ribosomal protein S7
TraesCS4D02G191400	blue	No DEG	AT3G02560	RPS7B	40S ribosomal protein S7-2	LOC_Os03g18570	40S ribosomal protein S7
TraesCS5D02G121600	blue	No DEG	AT5G39850	RPS9C	40S ribosomal protein S9-2	LOC_Os03g05980	40S ribosomal protein S9-2
TraesCS5A02G104000	blue	No DEG	AT5G39850	RPS9C	40S ribosomal protein S9-2	LOC_Os03g05980	40S ribosomal protein S9-2
TraesCS5B02G112200	blue	No DEG	AT5G39850	RPS9C	40S ribosomal protein S9-2	LOC_Os03g05980	40S ribosomal protein S9-2
TraesCS2D02G175700	blue	No DEG	AT1G72370	RPSAA	40S ribosomal protein Sa-1	LOC_Os07g42450	ribosomal protein S2
TraesCS4B02G299100	blue	No DEG	AT1G72370	RPSAA	40S ribosomal protein Sa-1	LOC_Os03g08440	ribosomal protein S2
TraesCS4D02G298000	blue	No DEG	AT1G72370	RPSAA	40S ribosomal protein Sa-1	LOC_Os03g08440	ribosomal protein S2
TraesCS4B02G326800	blue	Seedling	AT1G20510	4CLL5	4-coumarate--CoA ligase-like 5	LOC_Os03g04000	AMP-binding domain containing protein
TraesCS4D02G323500	blue	Germination	AT1G20510	4CLL5	4-coumarate--CoA ligase-like 5	LOC_Os03g04000	AMP-binding domain containing protein
TraesCS3B02G426200	blue	No DEG	AT5G63380	4CLL9	4-coumarate--CoA ligase-like 9	LOC_Os01g67540	AMP-binding domain containing protein
TraesCS4D02G074500	blue	Shared	AT5G63380	4CLL9	4-coumarate--CoA ligase-like 9	LOC_Os01g67540	AMP-binding domain containing protein
TraesCS4B02G226100	blue	Germination	AT3G59890	DAPB2	4-hydroxy-tetrahydrodipicolinate reductase 2%2C chloroplastic	LOC_Os03g14120	dihydrodipicolinate reductase
TraesCS4D02G226800	blue	Germination	AT3G59890	DAPB2	4-hydroxy-tetrahydrodipicolinate reductase 2%2C chloroplastic	LOC_Os03g14120	dihydrodipicolinate reductase
TraesCS4A02G069000	blue	No DEG	AT3G59890	DAPB2	4-hydroxy-tetrahydrodipicolinate reductase 2%2C chloroplastic	LOC_Os03g14120	dihydrodipicolinate reductase
TraesCS3A02G191400	blue	No DEG	AT3G56910	PSRP5	50S ribosomal protein 5%2C chloroplastic	LOC_Os01g17150	plastid-specific 50S ribosomal protein 5
TraesCS3D02G194000	blue	Shared	AT3G56910	PSRP5	50S ribosomal protein 5%2C chloroplastic	LOC_Os01g17150	plastid-specific 50S ribosomal protein 5
TraesCS7D02G267000	blue	Seedling	AT5G17870	PSRP6	50S ribosomal protein 6%2C chloroplastic	LOC_Os11g34940	plastid-specific 50S ribosomal protein 6
TraesCS7A02G267900	blue	Germination	AT5G17870	PSRP6	50S ribosomal protein 6%2C chloroplastic	LOC_Os11g34940	plastid-specific 50S ribosomal protein 6
TraesCS1D02G242500	blue	No DEG	AT3G63490	RPL1	50S ribosomal protein L1%2C chloroplastic	LOC_Os05g32220	L1P family of ribosomal proteins domain containing protein
TraesCS4D02G199500	blue	Germination	AT5G13510	RPL10	50S ribosomal protein L10%2C chloroplastic	LOC_Os03g17580	ribosomal protein L10
TraesCS4B02G347000	blue	Shared	AT1G32990	RPL11	50S ribosomal protein L11%2C chloroplastic	LOC_Os03g03020	L11 domain containing ribosomal protein
TraesCS4D02G341900	blue	Germination	AT1G32990	RPL11	50S ribosomal protein L11%2C chloroplastic	LOC_Os03g03020	L11 domain containing ribosomal protein
TraesCS3D02G240800	blue	Shared	AT3G27850	RPL12C	50S ribosomal protein L12-3%2C chloroplastic	LOC_Os01g47330	ribosomal protein L7/L12 C-terminal domain containing protein
TraesCS3B02G306000	blue	Seedling	AT1G78630	RPL13	50S ribosomal protein L13%2C chloroplastic	LOC_Os01g54540	ribosomal protein L13
TraesCS3A02G272200	blue	Germination	AT1G78630	RPL13	50S ribosomal protein L13%2C chloroplastic	LOC_Os01g54540	ribosomal protein L13
TraesCS3D02G271800	blue	Germination	AT1G78630	RPL13	50S ribosomal protein L13%2C chloroplastic	LOC_Os01g54540	ribosomal protein L13
TraesCS1A02G433700	blue	Seedling	ATCG00780	RPL14	50S ribosomal protein L14%2C chloroplastic	LOC_Os01g57956	chloroplast 50S ribosomal protein L14
TraesCS6D02G174900	blue	Seedling	ATCG00780	RPL14	50S ribosomal protein L14%2C chloroplastic	LOC_Os01g57956	chloroplast 50S ribosomal protein L14
TraesCSU02G106800	blue	Seedling	ATCG00780	RPL14	50S ribosomal protein L14%2C chloroplastic	LOC_Os01g57956	chloroplast 50S ribosomal protein L14
TraesCS6A02G194200	blue	Seedling	ATCG00780	RPL14	50S ribosomal protein L14%2C chloroplastic	LOC_Os01g57956	chloroplast 50S ribosomal protein L14
TraesCS3B02G187700	blue	Seedling	ATCG00780	RPL14	50S ribosomal protein L14%2C chloroplastic	LOC_Os01g57956	chloroplast 50S ribosomal protein L14
TraesCS4B02G242800	blue	Seedling	AT3G25920	RPL15	50S ribosomal protein L15%2C chloroplastic	LOC_Os03g12020	50S ribosomal protein L15
TraesCS4A02G065400	blue	Seedling	AT3G25920	RPL15	50S ribosomal protein L15%2C chloroplastic	LOC_Os03g12020	50S ribosomal protein L15
TraesCS4D02G242400	blue	No DEG	AT3G25920	RPL15	50S ribosomal protein L15%2C chloroplastic	LOC_Os03g12020	50S ribosomal protein L15
TraesCS2D02G243100	blue	Germination	ATCG00790	RPL16	50S ribosomal protein L16%2C chloroplastic	LOC_Os05g22724	chloroplast 50S ribosomal protein L16
TraesCS5B02G481100	blue	Shared	AT3G54210	RPL17	50S ribosomal protein L17%2C chloroplastic	LOC_Os03g60100	50S ribosomal protein L17
TraesCS5A02G468600	blue	Germination	AT3G54210	RPL17	50S ribosomal protein L17%2C chloroplastic	LOC_Os03g60100	50S ribosomal protein L17
TraesCS5D02G481500	blue	Germination	AT3G54210	RPL17	50S ribosomal protein L17%2C chloroplastic	LOC_Os03g60100	50S ribosomal protein L17
TraesCS5B02G503800	blue	Germination	AT1G48350	RPL18	50S ribosomal protein L18%2C chloroplastic	LOC_Os03g61260	ribosomal L18p/L5e family protein
TraesCS4A02G368800	blue	Seedling	AT1G48350	RPL18	50S ribosomal protein L18%2C chloroplastic	LOC_Os03g61260	ribosomal L18p/L5e family protein
TraesCS5D02G504600	blue	Seedling	AT1G48350	RPL18	50S ribosomal protein L18%2C chloroplastic	LOC_Os03g61260	ribosomal L18p/L5e family protein
TraesCS6A02G242300	blue	Shared	AT4G17560		50S ribosomal protein L19-1%2C chloroplastic	LOC_Os02g43600	50S ribosomal protein L19
TraesCS6B02G282200	blue	No DEG	AT4G17560		50S ribosomal protein L19-1%2C chloroplastic	LOC_Os02g43600	50S ribosomal protein L19
TraesCS6D02G224200	blue	Shared	AT4G17560		50S ribosomal protein L19-1%2C chloroplastic	LOC_Os02g43600	50S ribosomal protein L19
TraesCS2D02G263900	blue	Germination	ATCG00830	rpl2-B	50S ribosomal protein L2%2C chloroplastic	LOC_Os04g16816	uncharacterized protein ycf72
TraesCS1D02G179700	blue	Seedling	ATCG00830	rpl2-B	50S ribosomal protein L2%2C chloroplastic	LOC_Os04g16816	uncharacterized protein ycf72
TraesCS4A02G154700	blue	Shared	ATCG00830	rpl2-B	50S ribosomal protein L2%2C chloroplastic
TraesCS2B02G316200	blue	Shared	ATCG00660	RPL20	50S ribosomal protein L20%2C chloroplastic	LOC_Os08g15306	chloroplast 50S ribosomal protein L20
TraesCSU02G267600	blue	Seedling	ATCG00660	RPL20	50S ribosomal protein L20%2C chloroplastic	LOC_Os08g15306	chloroplast 50S ribosomal protein L20
TraesCS6A02G191400	blue	No DEG	AT1G35680	RPL21	50S ribosomal protein L21%2C chloroplastic	LOC_Os02g15900	50S ribosomal protein L21
TraesCS6D02G174500	blue	Shared	AT1G35680	RPL21	50S ribosomal protein L21%2C chloroplastic	LOC_Os02g15900	50S ribosomal protein L21
TraesCS6B02G219700	blue	Seedling	AT1G35680	RPL21	50S ribosomal protein L21%2C chloroplastic	LOC_Os02g15900	50S ribosomal protein L21
TraesCS3B02G187800	blue	Shared	ATCG00810	RPL22	50S ribosomal protein L22%2C chloroplastic	LOC_Os04g16822	chloroplast 50S ribosomal protein L22
TraesCSU02G270200	blue	Seedling	ATCG00810	RPL22	50S ribosomal protein L22%2C chloroplastic	LOC_Os04g16822	chloroplast 50S ribosomal protein L22
TraesCS2B02G338000	blue	No DEG	ATCG00810	RPL22	50S ribosomal protein L22%2C chloroplastic	LOC_Os04g16822	chloroplast 50S ribosomal protein L22
TraesCS6D02G175100	blue	Seedling	ATCG00810	RPL22	50S ribosomal protein L22%2C chloroplastic	LOC_Os04g16822	chloroplast 50S ribosomal protein L22
TraesCS2D02G242900	blue	Shared	ATCG00840	rpl23-B	50S ribosomal protein L23%2C chloroplastic	LOC_Os04g16782	chloroplast 50S ribosomal protein L23
TraesCS7D02G123800	blue	Seedling	ATCG00840	rpl23-B	50S ribosomal protein L23%2C chloroplastic	LOC_Os04g16782	chloroplast 50S ribosomal protein L23
TraesCS7B02G350400	blue	No DEG	AT5G54600	RPL24	50S ribosomal protein L24%2C chloroplastic	LOC_Os06g46930	ribosomal protein L24
TraesCS7A02G450600	blue	Seedling	AT5G54600	RPL24	50S ribosomal protein L24%2C chloroplastic	LOC_Os06g46930	ribosomal protein L24
TraesCS7D02G439900	blue	Germination	AT5G54600	RPL24	50S ribosomal protein L24%2C chloroplastic	LOC_Os06g46930	ribosomal protein L24
TraesCS3D02G428300	blue	No DEG	AT5G40950	RPL27	50S ribosomal protein L27%2C chloroplastic	LOC_Os01g69950	ribosomal protein L27
TraesCS3A02G435700	blue	Shared	AT5G40950	RPL27	50S ribosomal protein L27%2C chloroplastic	LOC_Os01g69950	ribosomal protein L27
TraesCS3B02G470400	blue	Germination	AT5G40950	RPL27	50S ribosomal protein L27%2C chloroplastic	LOC_Os01g69950	ribosomal protein L27
TraesCS1A02G001800	blue	Shared	AT2G33450	RPL28	50S ribosomal protein L28%2C chloroplastic	LOC_Os05g01110	ribosomal protein L28 protein
TraesCS6B02G349300	blue	No DEG	AT5G65220	RPL29	50S ribosomal protein L29%2C chloroplastic	LOC_Os02g51790	ribosomal protein L29
TraesCS6D02G298300	blue	Germination	AT5G65220	RPL29	50S ribosomal protein L29%2C chloroplastic	LOC_Os02g51790	ribosomal protein L29
TraesCS3A02G226800	blue	Germination	AT1G75350	RPL31	50S ribosomal protein L31%2C chloroplastic	LOC_Os01g44210	50S ribosomal protein L31
TraesCS3D02G224800	blue	Germination	AT1G75350	RPL31	50S ribosomal protein L31%2C chloroplastic	LOC_Os01g44210	50S ribosomal protein L31
TraesCS3B02G257700	blue	No DEG	AT1G75350	RPL31	50S ribosomal protein L31%2C chloroplastic	LOC_Os01g44210	50S ribosomal protein L31
TraesCS6D02G094200	blue	No DEG	AT2G43030	RPL3A	50S ribosomal protein L3-1%2C chloroplastic	LOC_Os02g04460	ribosomal protein L3
TraesCS6B02G134800	blue	Germination	AT2G43030	RPL3A	50S ribosomal protein L3-1%2C chloroplastic	LOC_Os02g04460	ribosomal protein L3
TraesCS6A02G105400	blue	Shared	AT2G43030	RPL3A	50S ribosomal protein L3-1%2C chloroplastic	LOC_Os02g04460	ribosomal protein L3
TraesCS3D02G176800	blue	No DEG	AT3G17465	RPL3B	50S ribosomal protein L3-2%2C chloroplastic	LOC_Os01g14830	ribosomal protein L3
TraesCS3A02G164700	blue	No DEG	AT3G17465	RPL3B	50S ribosomal protein L3-2%2C chloroplastic	LOC_Os01g14830	ribosomal protein L3
TraesCS3B02G201400	blue	No DEG	AT3G17465	RPL3B	50S ribosomal protein L3-2%2C chloroplastic	LOC_Os01g14830	ribosomal protein L3
TraesCS3D02G053000	blue	Germination	ATCG00640	RPL33	50S ribosomal protein L33%2C chloroplastic	LOC_Os06g39718	chloroplast 50S ribosomal protein L33
TraesCSU02G268900	blue	Seedling	ATCG00640	RPL33	50S ribosomal protein L33%2C chloroplastic	LOC_Os06g39718	chloroplast 50S ribosomal protein L33
TraesCS3D02G325800	blue	Shared	AT1G29070	RPL34	50S ribosomal protein L34%2C chloroplastic	LOC_Os01g59060	50S ribosomal protein
TraesCS3B02G362100	blue	Shared	AT1G29070	RPL34	50S ribosomal protein L34%2C chloroplastic	LOC_Os01g59060	50S ribosomal protein
TraesCS3A02G332300	blue	Shared	AT1G29070	RPL34	50S ribosomal protein L34%2C chloroplastic	LOC_Os01g59060	50S ribosomal protein
TraesCS4B02G213600	blue	Germination	AT1G07320	RPL4	50S ribosomal protein L4%2C chloroplastic	LOC_Os03g15870	ribosomal protein L4
TraesCS4D02G214300	blue	No DEG	AT1G07320	RPL4	50S ribosomal protein L4%2C chloroplastic	LOC_Os03g15870	ribosomal protein L4
TraesCS4A02G091100	blue	Shared	AT1G07320	RPL4	50S ribosomal protein L4%2C chloroplastic	LOC_Os03g15870	ribosomal protein L4
TraesCS4B02G344600	blue	No DEG	AT4G01310	RPL5	50S ribosomal protein L5%2C chloroplastic	LOC_Os03g03360	ribosomal protein L5
TraesCS5A02G513500	blue	No DEG	AT4G01310	RPL5	50S ribosomal protein L5%2C chloroplastic	LOC_Os03g03360	ribosomal protein L5
TraesCS4D02G339700	blue	Germination	AT4G01310	RPL5	50S ribosomal protein L5%2C chloroplastic	LOC_Os03g03360	ribosomal protein L5
TraesCS4A02G144500	blue	Seedling	AT1G05190	RPL6	50S ribosomal protein L6%2C chloroplastic	LOC_Os03g24020	ribosomal protein L6
TraesCS5A02G279700	blue	Shared	AT1G05190	RPL6	50S ribosomal protein L6%2C chloroplastic	LOC_Os03g24020	ribosomal protein L6
TraesCS4B02G157100	blue	No DEG	AT1G05190	RPL6	50S ribosomal protein L6%2C chloroplastic	LOC_Os03g24020	ribosomal protein L6
TraesCS6A02G406500	blue	Seedling	AT3G44890	RPL9	50S ribosomal protein L9%2C chloroplastic	LOC_Os02g57670	ribosomal L9
TraesCS6B02G450500	blue	Germination	AT3G44890	RPL9	50S ribosomal protein L9%2C chloroplastic	LOC_Os02g57670	ribosomal L9
TraesCS6D02G390000	blue	Germination	AT3G44890	RPL9	50S ribosomal protein L9%2C chloroplastic	LOC_Os02g57670	ribosomal L9
TraesCS5A02G327200	blue	No DEG	AT5G42540	XRN2	5'-3' exoribonuclease 2	LOC_Os02g28074	XRN 5-3 exonuclease N-terminus family protein
TraesCS5B02G118300	blue	No DEG	AT1G76730	COG0212	5-formyltetrahydrofolate cyclo-ligase-like protein COG0212	LOC_Os12g07020	5-formyltetrahydrofolate cyclo-ligase
TraesCS7D02G313800	blue	No DEG	AT5G24510		60S acidic ribosomal protein family	LOC_Os08g02340	60S acidic ribosomal protein
TraesCS7B02G217900	blue	No DEG	AT5G24510		60S acidic ribosomal protein family	LOC_Os08g02340	60S acidic ribosomal protein
TraesCS7B02G209900	blue	No DEG	AT2G40010	RPP0A	60S acidic ribosomal protein P0-1	LOC_Os11g04070	60S acidic ribosomal protein P0
TraesCS7D02G306600	blue	No DEG	AT3G09200	RPP0B	60S acidic ribosomal protein P0-2	LOC_Os11g04070	60S acidic ribosomal protein P0
TraesCS4D02G105600	blue	No DEG	AT1G26910	RPL10B	60S ribosomal protein L10-2	LOC_Os11g11390	ribosomal protein
TraesCS7A02G278700	blue	No DEG	AT2G27530	RPL10AB	60S ribosomal protein L10a-2	LOC_Os08g44450	L1P family of ribosomal proteins domain containing protein
TraesCS3D02G137600	blue	No DEG	AT2G42740	RPL11A	60S ribosomal protein L11-1	LOC_Os01g10820	ribosomal protein L5
TraesCS3A02G136800	blue	No DEG	AT2G42740	RPL11A	60S ribosomal protein L11-1	LOC_Os01g10820	ribosomal protein L5
TraesCS3B02G154600	blue	No DEG	AT2G42740	RPL11A	60S ribosomal protein L11-1	LOC_Os01g10820	ribosomal protein L5
TraesCS6D02G055400	blue	No DEG	AT3G49010	RPL13B	60S ribosomal protein L13-1	LOC_Os06g02510	ribosomal protein L13
TraesCS6A02G047900	blue	No DEG	AT3G49010	RPL13B	60S ribosomal protein L13-1	LOC_Os06g02510	ribosomal protein L13
TraesCS7A02G296800	blue	No DEG	AT3G49010	RPL13B	60S ribosomal protein L13-1	LOC_Os06g02510	ribosomal protein L13
TraesCS7B02G189800	blue	No DEG	AT3G49010	RPL13B	60S ribosomal protein L13-1	LOC_Os06g02510	ribosomal protein L13
TraesCS2A02G383600	blue	No DEG	AT2G20450	RPL14A	60S ribosomal protein L14-1	LOC_Os02g40880	ribosomal protein L14
TraesCS5D02G161400	blue	No DEG	AT4G16720	RPL15A	60S ribosomal protein L15-1	LOC_Os03g40180	60S ribosomal protein L15
TraesCS5B02G154300	blue	No DEG	AT4G17390	RPL15B	60S ribosomal protein L15-2	LOC_Os03g40180	60S ribosomal protein L15
TraesCS5A02G156100	blue	No DEG	AT4G17390	RPL15B	60S ribosomal protein L15-2	LOC_Os03g40180	60S ribosomal protein L15
TraesCS7D02G260500	blue	No DEG	AT1G27400	RPL17A	60S ribosomal protein L17-1	LOC_Os09g08430	ribosomal protein L22
TraesCS7B02G157300	blue	No DEG	AT1G27400	RPL17A	60S ribosomal protein L17-1	LOC_Os09g08430	ribosomal protein L22
TraesCS7A02G259500	blue	No DEG	AT1G27400	RPL17A	60S ribosomal protein L17-1	LOC_Os09g08430	ribosomal protein L22
TraesCS5A02G170300	blue	No DEG	AT1G27400	RPL17A	60S ribosomal protein L17-1	LOC_Os09g08430	ribosomal protein L22
TraesCS5D02G174700	blue	No DEG	AT1G27400	RPL17A	60S ribosomal protein L17-1	LOC_Os09g08430	ribosomal protein L22
TraesCS5B02G167100	blue	No DEG	AT1G27400	RPL17A	60S ribosomal protein L17-1	LOC_Os09g08430	ribosomal protein L22
TraesCS1D02G105500	blue	No DEG	AT3G05590	RPL18B	60S ribosomal protein L18-2	LOC_Os05g06310	60S ribosomal protein L18-3
TraesCS2B02G127900	blue	No DEG	AT3G05590	RPL18B	60S ribosomal protein L18-2	LOC_Os07g47780	60S ribosomal protein L18-3
TraesCS3A02G247600	blue	No DEG	AT2G34480	RPL18AB	60S ribosomal protein L18a-2	LOC_Os01g47660	60S ribosomal protein L18a
TraesCS3D02G243800	blue	No DEG	AT2G34480	RPL18AB	60S ribosomal protein L18a-2	LOC_Os01g47660	60S ribosomal protein L18a
TraesCS1A02G399800	blue	No DEG	AT2G34480	RPL18AB	60S ribosomal protein L18a-2	LOC_Os05g49030	60S ribosomal protein L18a
TraesCS1B02G427900	blue	No DEG	AT2G34480	RPL18AB	60S ribosomal protein L18a-2	LOC_Os05g49030	60S ribosomal protein L18a
TraesCS1D02G407500	blue	No DEG	AT2G34480	RPL18AB	60S ribosomal protein L18a-2	LOC_Os05g49030	60S ribosomal protein L18a
TraesCS2D02G109000	blue	No DEG	AT3G16780	RPL19B	60S ribosomal protein L19-2	LOC_Os03g38260	60S ribosomal protein L19-3
TraesCS2B02G109000	blue	No DEG	AT3G16780	RPL19B	60S ribosomal protein L19-2	LOC_Os03g38260	60S ribosomal protein L19-3
TraesCS4D02G170100	blue	Germination	AT3G16780	RPL19B	60S ribosomal protein L19-2	LOC_Os03g38260	60S ribosomal protein L19-3
TraesCS6A02G385700	blue	No DEG	AT1G04480	RPL23C	60S ribosomal protein L23	LOC_Os02g56960	ribosomal protein
TraesCS1B02G166100	blue	Seedling	AT1G04480	RPL23C	60S ribosomal protein L23	LOC_Os02g56960	ribosomal protein
TraesCS6B02G424800	blue	No DEG	AT1G04480	RPL23C	60S ribosomal protein L23	LOC_Os02g56960	ribosomal protein
TraesCS3D02G332800	blue	No DEG	AT2G36620	RPL24A	60S ribosomal protein L24-1	LOC_Os01g59990	ribosomal protein L24
TraesCS3B02G370900	blue	No DEG	AT2G36620	RPL24A	60S ribosomal protein L24-1	LOC_Os01g59990	ribosomal protein L24
TraesCS5D02G481100	blue	No DEG	AT3G53020	RPL24B	60S ribosomal protein L24-2	LOC_Os07g12250	ribosomal protein L24
TraesCS3D02G253300	blue	No DEG	AT2G19730	RPL28A	60S ribosomal protein L28-1	LOC_Os01g51020	60S ribosomal protein L28-1
TraesCS3A02G252700	blue	No DEG	AT2G19730	RPL28A	60S ribosomal protein L28-1	LOC_Os01g51020	60S ribosomal protein L28-1
TraesCS3B02G284300	blue	No DEG	AT2G19730	RPL28A	60S ribosomal protein L28-1	LOC_Os01g51020	60S ribosomal protein L28-1
TraesCS1D02G368700	blue	No DEG	AT2G19730	RPL28A	60S ribosomal protein L28-1	LOC_Os02g57540	60S ribosomal protein L28-1
TraesCS1B02G240000	blue	No DEG	AT3G06680	RPL29B	60S ribosomal protein L29-2	LOC_Os01g19840	60S ribosomal protein L29-2
TraesCS1D02G227300	blue	No DEG	AT3G06680	RPL29B	60S ribosomal protein L29-2	LOC_Os01g19840	60S ribosomal protein L29-2
TraesCS5B02G118400	blue	No DEG	AT1G43170	ARP1	60S ribosomal protein L3-1	LOC_Os12g07010	ribosomal protein L3
TraesCS5D02G129200	blue	No DEG	AT1G43170	ARP1	60S ribosomal protein L3-1	LOC_Os12g07010	ribosomal protein L3
TraesCS5A02G112400	blue	No DEG	AT1G43170	ARP1	60S ribosomal protein L3-1	LOC_Os12g07010	ribosomal protein L3
TraesCS7A02G244800	blue	No DEG	AT5G56710	RPL31C	60S ribosomal protein L31-3	LOC_Os08g39500	60S ribosomal protein L31
TraesCS6B02G310100	blue	No DEG	AT5G56710	RPL31C	60S ribosomal protein L31-3	LOC_Os06g21480	60S ribosomal protein L31
TraesCS7D02G296300	blue	No DEG	AT1G26880	RPL34A	60S ribosomal protein L34-1	LOC_Os08g06040	60S ribosomal protein L34
TraesCS7A02G300500	blue	No DEG	AT1G26880	RPL34A	60S ribosomal protein L34-1	LOC_Os09g24690	60S ribosomal protein L34
TraesCS2D02G277700	blue	No DEG	AT2G39390	RPL35B	60S ribosomal protein L35-2	LOC_Os02g30050	ribosomal protein L29
TraesCS2B02G296200	blue	No DEG	AT2G39390	RPL35B	60S ribosomal protein L35-2	LOC_Os02g30050	ribosomal protein L29
TraesCSU02G081000	blue	No DEG	AT1G74270	RPL35AC	60S ribosomal protein L35a-3	LOC_Os02g54470	60S ribosomal protein L35a-3
TraesCS5B02G039700	blue	No DEG	AT3G53740	RPL36B	60S ribosomal protein L36-2	LOC_Os05g38520	60S ribosomal protein L36-2
TraesCS5D02G045600	blue	No DEG	AT3G53740	RPL36B	60S ribosomal protein L36-2	LOC_Os05g38520	60S ribosomal protein L36-2
TraesCS1D02G283800	blue	No DEG	AT3G53740	RPL36B	60S ribosomal protein L36-2	LOC_Os05g38520	60S ribosomal protein L36-2
TraesCS3D02G352800	blue	No DEG	AT3G53740	RPL36B	60S ribosomal protein L36-2	LOC_Os05g38520	60S ribosomal protein L36-2
TraesCS2B02G246000	blue	No DEG	AT3G23390	RPL36AB	60S ribosomal protein L36a	LOC_Os07g26740	60S ribosomal protein L44
TraesCS2D02G226100	blue	No DEG	AT3G23390	RPL36AB	60S ribosomal protein L36a	LOC_Os07g26740	60S ribosomal protein L44
TraesCS6B02G041500	blue	No DEG	AT1G52300	RPL37B	60S ribosomal protein L37-2	LOC_Os02g02130	ribosomal protein L37
TraesCS6D02G033200	blue	No DEG	AT1G52300	RPL37B	60S ribosomal protein L37-2	LOC_Os02g02130	ribosomal protein L37
TraesCS3B02G578700	blue	No DEG	AT2G43460	RPL38B	60S ribosomal protein L38	LOC_Os11g24610	60S ribosomal protein L38
TraesCS1D02G264200	blue	No DEG	AT3G09630	RPL4A	60S ribosomal protein L4-1	LOC_Os03g58204	ribosomal protein L4
TraesCS5B02G442100	blue	No DEG	AT3G09630	RPL4A	60S ribosomal protein L4-1	LOC_Os03g58204	ribosomal protein L4
TraesCS5D02G446300	blue	No DEG	AT3G09630	RPL4A	60S ribosomal protein L4-1	LOC_Os03g58204	ribosomal protein L4
TraesCS2D02G293900	blue	No DEG	AT3G25520	ATL5	60S ribosomal protein L5-1	LOC_Os01g67134	ribosomal L18p/L5e family protein
TraesCS2A02G296000	blue	No DEG	AT3G25520	ATL5	60S ribosomal protein L5-1	LOC_Os01g67134	ribosomal L18p/L5e family protein
TraesCS5A02G372700	blue	No DEG	AT3G25520	ATL5	60S ribosomal protein L5-1	LOC_Os01g67134	ribosomal L18p/L5e family protein
TraesCS2B02G312400	blue	No DEG	AT3G25520	ATL5	60S ribosomal protein L5-1	LOC_Os01g67134	ribosomal L18p/L5e family protein
TraesCS6B02G225600	blue	No DEG	AT1G18540	RPL6A	60S ribosomal protein L6-1	LOC_Os02g37862	60S ribosomal protein L6
TraesCS2D02G430500	blue	No DEG	AT2G01250	RPL7B	60S ribosomal protein L7-2	LOC_Os04g51630	60S ribosomal protein L7
TraesCS5B02G461300	blue	No DEG	AT3G13580	RPL7D	60S ribosomal protein L7-4	LOC_Os04g51630	60S ribosomal protein L7
TraesCS5A02G288400	blue	No DEG	AT2G47610	RPL7AA	60S ribosomal protein L7a-1	LOC_Os08g23710	ribosomal protein L7Ae
TraesCS7B02G159700	blue	No DEG	AT3G62870	RPL7AB	60S ribosomal protein L7a-2	LOC_Os08g23710	ribosomal protein L7Ae
TraesCS7D02G262800	blue	No DEG	AT3G62870	RPL7AB	60S ribosomal protein L7a-2	LOC_Os08g23710	ribosomal protein L7Ae
TraesCS1D02G256000	blue	Germination	AT5G55230	MAP65-1	65-kDa microtubule-associated protein 1	LOC_Os05g33890	microtubule associated protein
TraesCS1A02G378900	blue	No DEG	AT5G51600	MAP65-3	65-kDa microtubule-associated protein 3	LOC_Os01g49200	microtubule associated protein
TraesCS1A02G110900	blue	No DEG	AT1G07110	FKFBP	6-phosphofructo-2-kinase/fructose-2%2C6-bisphosphatase	LOC_Os05g07130	6PF-2-K/Fru-2
TraesCS1D02G112300	blue	No DEG	AT1G07110	FKFBP	6-phosphofructo-2-kinase/fructose-2%2C6-bisphosphatase	LOC_Os05g07130	6PF-2-K/Fru-2
TraesCS1B02G129000	blue	No DEG	AT1G07110	FKFBP	6-phosphofructo-2-kinase/fructose-2%2C6-bisphosphatase	LOC_Os05g07130	6PF-2-K/Fru-2
TraesCS3B02G565200	blue	No DEG	AT3G02360		6-phosphogluconate dehydrogenase%2C decarboxylating 3	LOC_Os06g02144	6-phosphogluconate dehydrogenase
TraesCS7A02G092300	blue	No DEG	AT3G02360		6-phosphogluconate dehydrogenase%2C decarboxylating 3	LOC_Os06g02144	6-phosphogluconate dehydrogenase
TraesCS1D02G241000	blue	Germination	AT1G04620	HCAR	7-hydroxymethyl chlorophyll a reductase%2C chloroplastic	LOC_Os04g25400	uncharacterized protein all1601
TraesCS1B02G252900	blue	Germination	AT1G04620	HCAR	7-hydroxymethyl chlorophyll a reductase%2C chloroplastic	LOC_Os04g25400	uncharacterized protein all1601
TraesCS1A02G241000	blue	Germination	AT1G04620	HCAR	7-hydroxymethyl chlorophyll a reductase%2C chloroplastic	LOC_Os04g25400	uncharacterized protein all1601
TraesCS1A02G342900	blue	Seedling	AT3G47730	ABCA2	ABC transporter A family member 2	LOC_Os08g30740	ABC transporter
TraesCS1D02G345100	blue	No DEG	AT3G47730	ABCA2	ABC transporter A family member 2	LOC_Os08g30740	ABC transporter
TraesCS1B02G356100	blue	Shared	AT3G47730	ABCA2	ABC transporter A family member 2	LOC_Os08g30740	ABC transporter
TraesCS6D02G170100	blue	Germination	AT3G47740	ABCA3	ABC transporter A family member 3	LOC_Os02g11960	ABC transporter
TraesCS6A02G183200	blue	Shared	AT3G47740	ABCA3	ABC transporter A family member 3	LOC_Os02g11960	ABC transporter
TraesCS1B02G356200	blue	Shared	AT3G47780	ABCA7	ABC transporter A family member 7	LOC_Os08g30770	ABC transporter
TraesCS1D02G345200	blue	Germination	AT3G47780	ABCA7	ABC transporter A family member 7	LOC_Os08g30770	ABC transporter
TraesCS6B02G199700	blue	No DEG	AT3G28345	ABCB15	ABC transporter B family member 15	LOC_Os02g09720	multidrug resistance protein
TraesCS6A02G171800	blue	Seedling	AT3G28345	ABCB15	ABC transporter B family member 15	LOC_Os02g09720	multidrug resistance protein
TraesCS1D02G082900	blue	No DEG	AT3G62150	ABCB21	ABC transporter B family member 21	LOC_Os01g18670	MDR-like ABC transporter
TraesCS4A02G132700	blue	No DEG	AT5G58270	ABCB25	ABC transporter B family member 25%2C mitochondrial	LOC_Os06g03770	ABC transporter
TraesCS3A02G417100	blue	Germination	AT1G70610	ABCB26	ABC transporter B family member 26%2C chloroplastic	LOC_Os01g68330	antigen peptide transporter-like 1
TraesCS5D02G402400	blue	No DEG	AT5G39040	ABCB27	ABC transporter B family member 27	LOC_Os03g54790	ABC transporter
TraesCS7B02G282800	blue	No DEG	AT4G25450	ABCB28	ABC transporter B family member 28	LOC_Os07g28090	ABC transporter
TraesCS7D02G377200	blue	No DEG	AT4G25450	ABCB28	ABC transporter B family member 28	LOC_Os07g28090	ABC transporter
TraesCS3A02G258300	blue	Seedling	AT2G47000	ABCB4	ABC transporter B family member 4	LOC_Os01g50080	MDR-like ABC transporter
TraesCS7D02G115100	blue	Seedling	AT3G59140	ABCC10	ABC transporter C family member 10	LOC_Os04g13210	multidrug resistance-associated protein
TraesCS7B02G015400	blue	No DEG	AT3G59140	ABCC10	ABC transporter C family member 10	LOC_Os06g06440	ABC transporter
TraesCS7A02G119000	blue	No DEG	AT3G59140	ABCC10	ABC transporter C family member 10	LOC_Os06g06440	ABC transporter
TraesCS1B02G433800	blue	No DEG	AT2G34660	ABCC2	ABC transporter C family member 2	LOC_Os04g52900	ABC transporter family protein
TraesCS4A02G051100	blue	No DEG	AT3G13080	ABCC3	ABC transporter C family member 3	LOC_Os01g07870	ABC transporter family protein
TraesCS5D02G480600	blue	No DEG	AT2G47800	ABCC4	ABC transporter C family member 4	LOC_Os01g25386	multidrug resistance-associated protein
TraesCS3B02G142200	blue	Seedling	AT3G21250	ABCC8	ABC transporter C family member 8	LOC_Os05g10730	ABC transporter
TraesCS3D02G124700	blue	Seedling	AT3G21250	ABCC8	ABC transporter C family member 8	LOC_Os05g10730	ABC transporter
TraesCS3A02G123000	blue	Seedling	AT3G60160	ABCC9	ABC transporter C family member 9	LOC_Os01g25386	multidrug resistance-associated protein
TraesCS3A02G143200	blue	No DEG	AT1G54350	ABCC2	ABC transporter D family member 2%2C chloroplastic	LOC_Os01g11946	ABC transporter
TraesCS6A02G140300	blue	No DEG	AT1G17840	ABCG11	ABC transporter G family member 11	LOC_Os09g03939	white-brown complex homolog protein 11
TraesCS5D02G257000	blue	Seedling	AT1G17840	ABCG11	ABC transporter G family member 11	LOC_Os09g07670	white-brown complex homolog protein 11
TraesCSU02G020100	blue	No DEG	AT1G17840	ABCG11	ABC transporter G family member 11	LOC_Os04g44610	white-brown complex homolog protein 11
TraesCS2A02G374100	blue	Shared	AT1G17840	ABCG11	ABC transporter G family member 11	LOC_Os04g44610	white-brown complex homolog protein 11
TraesCS6B02G168800	blue	Germination	AT1G17840	ABCG11	ABC transporter G family member 11	LOC_Os09g03939	white-brown complex homolog protein 11
TraesCS5A02G249900	blue	Seedling	AT1G17840	ABCG11	ABC transporter G family member 11	LOC_Os09g07670	white-brown complex homolog protein 11
TraesCS2D02G370400	blue	No DEG	AT1G17840	ABCG11	ABC transporter G family member 11	LOC_Os04g44610	white-brown complex homolog protein 11
TraesCS1D02G126600	blue	No DEG	AT1G51500	ABCG12	ABC transporter G family member 12	LOC_Os05g13520	white-brown complex homolog protein 12
TraesCS1A02G126900	blue	No DEG	AT1G51500	ABCG12	ABC transporter G family member 12	LOC_Os05g13520	white-brown complex homolog protein 12
TraesCS4A02G032900	blue	Germination	AT5G06530	ABCG22	ABC transporter G family member 22	LOC_Os03g06139	ABC-2 type transporter domain containing protein
TraesCS4B02G272400	blue	Germination	AT5G06530	ABCG22	ABC transporter G family member 22	LOC_Os03g06139	ABC-2 type transporter domain containing protein
TraesCS7B02G280300	blue	No DEG	AT3G13220	ABCG26	ABC transporter G family member 26	LOC_Os06g40550	ABC-2 type transporter domain containing protein
TraesCS1D02G140400	blue	Seedling	AT5G60740	ABCG28	ABC transporter G family member 28	LOC_Os10g30610	white-brown complex homolog protein
TraesCS6A02G243200	blue	Seedling	AT3G16340	ABCG29	ABC transporter G family member 29	LOC_Os06g36090	ABC-2 type transporter
TraesCS5D02G551400	blue	No DEG	AT2G28070	ABCG3	ABC transporter G family member 3	LOC_Os03g64200	ABC-2 type transporter
TraesCS5D02G452500	blue	Seedling	AT2G36380	ABCG34	ABC transporter G family member 34	LOC_Os11g37700	pleiotropic drug resistance protein
TraesCS7B02G271600	blue	Seedling	AT1G59870	ABCG36	ABC transporter G family member 36	LOC_Os06g36090	ABC-2 type transporter
TraesCS5D02G163500	blue	No DEG	AT3G53480	ABCG37	ABC transporter G family member 37	LOC_Os12g32820	pleiotropic drug resistance protein 3
TraesCS5A02G158100	blue	No DEG	AT3G53480	ABCG37	ABC transporter G family member 37	LOC_Os12g32820	pleiotropic drug resistance protein 3
TraesCS5B02G572600	blue	Germination	AT1G66950	ABCG39	ABC transporter G family member 39	LOC_Os11g37700	pleiotropic drug resistance protein
TraesCS5A02G447200	blue	Seedling	AT1G66950	ABCG39	ABC transporter G family member 39	LOC_Os11g37700	pleiotropic drug resistance protein
TraesCS5B02G449500	blue	Seedling	AT1G66950	ABCG39	ABC transporter G family member 39	LOC_Os02g21340	ABC-2 type transporter family protein
TraesCS5A02G016200	blue	Seedling	AT1G66950	ABCG39	ABC transporter G family member 39	LOC_Os07g33780	pleiotropic drug resistance protein 5
TraesCS7B02G000200	blue	No DEG	AT1G66950	ABCG39	ABC transporter G family member 39	LOC_Os01g42380	pleiotropic drug resistance protein
TraesCS4A02G331100	blue	Shared	AT1G66950	ABCG39	ABC transporter G family member 39	LOC_Os07g33780	pleiotropic drug resistance protein 5
TraesCS5D02G564000	blue	Seedling	AT1G66950	ABCG39	ABC transporter G family member 39	LOC_Os01g42380	pleiotropic drug resistance protein
TraesCS7A02G391000	blue	Shared	AT1G15520	ABCG40	ABC transporter G family member 40	LOC_Os12g32820	pleiotropic drug resistance protein 3
TraesCS4A02G103400	blue	Germination	AT5G13580	ABCG6	ABC transporter G family member 6	LOC_Os03g17350	white-brown complex homolog protein
TraesCS3A02G026500	blue	No DEG	AT2G01320	ABCG7	ABC transporter G family member 7	LOC_Os01g03144	white-brown complex homolog protein 7
TraesCS3A02G399500	blue	No DEG	AT5G14100	ABCI11	ABC transporter I family member 11%2C chloroplastic	LOC_Os11g29850	ABC transporter
TraesCS3D02G393600	blue	No DEG	AT5G14100	ABCI11	ABC transporter I family member 11%2C chloroplastic	LOC_Os11g29850	ABC transporter
TraesCS6D02G186800	blue	No DEG	AT5G64940	ATATH13	ABC2 homolog 13	LOC_Os02g36570	ABC1 family domain containing protein
TraesCS6B02G223600	blue	No DEG	AT5G64940	ATATH13	ABC2 homolog 13	LOC_Os02g36570	ABC1 family domain containing protein
TraesCS6A02G203700	blue	No DEG	AT5G64940	ATATH13	ABC2 homolog 13	LOC_Os02g36570	ABC1 family domain containing protein
TraesCS7D02G171300	blue	No DEG	AT4G34000	ABF3	ABSCISIC ACID-INSENSITIVE 5-like protein 6	LOC_Os06g10880	bZIP transcription factor
TraesCS7A02G170600	blue	Germination	AT4G34000	ABF3	ABSCISIC ACID-INSENSITIVE 5-like protein 6	LOC_Os06g10880	bZIP transcription factor
TraesCS7D02G290500	blue	No DEG	AT5G38660	APE1	acclimation of photosynthesis to environment	LOC_Os08g27010	APE1
TraesCS7A02G291000	blue	No DEG	AT5G38660	APE1	acclimation of photosynthesis to environment	LOC_Os08g27010	APE1
TraesCS3D02G300700	blue	Seedling	AT4G37550		Acetamidase/Formamidase family protein	LOC_Os01g55950	acetamidase
TraesCS3B02G335400	blue	Seedling	AT4G37550		Acetamidase/Formamidase family protein	LOC_Os01g55950	acetamidase
TraesCS3A02G301100	blue	Seedling	AT4G37550		Acetamidase/Formamidase family protein	LOC_Os01g55950	acetamidase
TraesCS4D02G083900	blue	Seedling	AT2G31810		Acetolactate synthase small subunit 2%2C chloroplastic	LOC_Os11g14950	ACT domain containing protein
TraesCS5B02G166200	blue	No DEG	AT5G48230	AAT1	Acetyl-CoA acetyltransferase%2C cytosolic 1	LOC_Os09g07830	acetyl-CoA acetyltransferase
TraesCS6D02G376900	blue	No DEG	AT5G36880	ACS	Acetyl-coenzyme A synthetase%2C chloroplastic/glyoxysomal	LOC_Os02g32490	AMP-binding enzyme
TraesCS6A02G390600	blue	Seedling	AT5G36880	ACS	Acetyl-coenzyme A synthetase%2C chloroplastic/glyoxysomal	LOC_Os02g32490	AMP-binding enzyme
TraesCS1B02G312700	blue	No DEG	AT1G32070	NSI	Acetyltransferase NSI	LOC_Os05g40260	acetyltransferase
TraesCS1A02G302500	blue	No DEG	AT1G32070	NSI	Acetyltransferase NSI	LOC_Os05g40260	acetyltransferase
TraesCS1D02G301900	blue	No DEG	AT1G32070	NSI	Acetyltransferase NSI	LOC_Os05g40260	acetyltransferase
TraesCS1A02G352500	blue	Germination	AT3G61770		Acid phosphatase/vanadium-dependent haloperoxidase-related protein	LOC_Os05g45770	Divergent PAP2 family domain containing protein
TraesCS1D02G211600	blue	Germination	AT1G63680	ATMURE	acid-amino acid ligases%3Bligases%3BATP binding%3BATP binding%3Bligases	LOC_Os10g40130	Mur ligase family protein
TraesCSU02G026200	blue	No DEG	AT5G24090	CHIB1	Acidic endochitinase	LOC_Os06g25010	glycosyl hydrolase
TraesCS4A02G173800	blue	Shared	AT5G24090	CHIB1	Acidic endochitinase	LOC_Os11g47580	glycosyl hydrolase
TraesCS3D02G188200	blue	Germination	AT2G05710	ACO2	Aconitate hydratase 2%2C mitochondrial	LOC_Os08g09200	aconitate hydratase protein
TraesCS3B02G213900	blue	No DEG	AT2G05710	ACO2	Aconitate hydratase 2%2C mitochondrial	LOC_Os08g09200	aconitate hydratase protein
TraesCS7A02G294200	blue	Seedling	AT1G16880	ACR11	ACT domain-containing protein ACR11	LOC_Os08g14440	uridylyltransferase-related
TraesCS7D02G289900	blue	Seedling	AT1G16880	ACR11	ACT domain-containing protein ACR11	LOC_Os08g14440	uridylyltransferase-related
TraesCS7B02G186500	blue	Seedling	AT1G16880	ACR11	ACT domain-containing protein ACR11	LOC_Os08g14440	uridylyltransferase-related
TraesCS2D02G588200	blue	Germination	AT2G17700		ACT-like protein tyrosine kinase family protein	LOC_Os04g59000	protein kinase family protein
TraesCS6B02G096400	blue	Shared	AT4G38470		ACT-like protein tyrosine kinase family protein	LOC_Os02g02780	protein kinase family protein
TraesCS2A02G577000	blue	Seedling	AT2G17700		ACT-like protein tyrosine kinase family protein	LOC_Os04g59000	protein kinase family protein
TraesCS2A02G280700	blue	No DEG	AT2G43710	FAB2	Acyl-	LOC_Os04g31070	acyl-desaturase
TraesCS3B02G463000	blue	Seedling	AT2G43710	FAB2	Acyl-	LOC_Os01g69080	acyl-desaturase
TraesCS3A02G426800	blue	No DEG	AT2G43710	FAB2	Acyl-	LOC_Os01g69080	acyl-desaturase
TraesCS5B02G102000	blue	Seedling	AT4G25050	ACP4	Acyl carrier protein 4%2C chloroplastic	LOC_Os12g34890	acyl carrier protein
TraesCS2B02G394200	blue	Shared	AT1G33270		Acyl transferase/acyl hydrolase/lysophospholipase superfamily protein	LOC_Os11g34370	phospholipase
TraesCS1D02G086600	blue	Germination	AT4G28030		Acyl-CoA N-acyltransferases (NAT) superfamily protein	LOC_Os08g16010	acetyltransferase
TraesCS3B02G248900	blue	No DEG	AT5G11340		Acyl-CoA N-acyltransferases (NAT) superfamily protein	LOC_Os01g42470	acetyltransferase
TraesCS2D02G328000	blue	Germination	AT1G24040		Acyl-CoA N-acyltransferases (NAT) superfamily protein	LOC_Os04g39140	acetyltransferase
TraesCS2A02G319700	blue	Germination	AT1G24040		Acyl-CoA N-acyltransferases (NAT) superfamily protein	LOC_Os04g39140	acetyltransferase
TraesCS1A02G085500	blue	No DEG	AT4G28030		Acyl-CoA N-acyltransferases (NAT) superfamily protein	LOC_Os08g16010	acetyltransferase
TraesCS5A02G145900	blue	Germination	AT4G19985		Acyl-CoA N-acyltransferases (NAT) superfamily protein	LOC_Os05g44020	acetyltransferase
TraesCS2A02G409200	blue	Seedling	AT1G01710		Acyl-CoA thioesterase family protein	LOC_Os04g47120	acyl-CoA thioesterase 2
TraesCS6D02G082200	blue	Shared	AT1G54570		Acyltransferase-like protein At1g54570%2C chloroplastic	LOC_Os01g26039	expressed protein
TraesCS6A02G100300	blue	Shared	AT1G54570		Acyltransferase-like protein At1g54570%2C chloroplastic	LOC_Os01g26039	expressed protein
TraesCS1D02G147000	blue	Seedling	AT1G54570		Acyltransferase-like protein At1g54570%2C chloroplastic	LOC_Os01g26039	expressed protein
TraesCS4A02G164000	blue	No DEG	AT1G68050	ADO3	Adagio protein 3	LOC_Os11g34460	OsFBO10 - F-box and other domain containing protein
TraesCS2D02G112900	blue	No DEG	AT2G47710		Adenine nucleotide alpha hydrolases-like superfamily protein	LOC_Os07g47620	universal stress protein domain containing protein
TraesCS1A02G280700	blue	No DEG	AT3G53990		Adenine nucleotide alpha hydrolases-like superfamily protein	LOC_Os05g37970	universal stress protein domain containing protein
TraesCS1B02G289700	blue	Seedling	AT3G53990		Adenine nucleotide alpha hydrolases-like superfamily protein	LOC_Os05g37970	universal stress protein domain containing protein
TraesCS2B02G607100	blue	No DEG	AT1G01760		adenosine deaminases%3BRNA binding%3BRNA binding%3Badenosine deaminases	LOC_Os04g58690	tRNA-specific adenosine deaminase 1
TraesCS7A02G382500	blue	Seedling	AT5G63400	ADK1	Adenylate kinase 4	LOC_Os12g13380	adenylate kinase
TraesCS5A02G121000	blue	No DEG	AT5G63400	ADK1	Adenylate kinase 4	LOC_Os12g13380	adenylate kinase
TraesCS5D02G118800	blue	No DEG	AT5G63400	ADK1	Adenylate kinase 4	LOC_Os12g13380	adenylate kinase
TraesCS5B02G111400	blue	No DEG	AT5G63400	ADK1	Adenylate kinase 4	LOC_Os12g13380	adenylate kinase
TraesCS6D02G077500	blue	Germination	AT5G35170		Adenylate kinase 5%2C chloroplastic	LOC_Os08g19140	adenylate kinase family protein
TraesCS4A02G276300	blue	No DEG	AT3G57610	PURA	Adenylosuccinate synthetase%2C chloroplastic	LOC_Os03g49220	adenylosuccinate synthetase
TraesCS4D02G034700	blue	No DEG	AT3G57610	PURA	Adenylosuccinate synthetase%2C chloroplastic	LOC_Os03g49220	adenylosuccinate synthetase
TraesCS3A02G233300	blue	No DEG	AT1G80300	AATP1	ADP%2CATP carrier protein 1%2C chloroplastic	LOC_Os01g45910	plastidic ATP/ADP-transporter
TraesCS3D02G219900	blue	No DEG	AT1G80300	AATP1	ADP%2CATP carrier protein 1%2C chloroplastic	LOC_Os01g45910	plastidic ATP/ADP-transporter
TraesCS6B02G190600	blue	No DEG	AT4G21160	AGD12	ADP-ribosylation factor GTPase-activating protein AGD12	LOC_Os02g10480	stromal membrane-associated protein
TraesCS6A02G160700	blue	Germination	AT4G21160	AGD12	ADP-ribosylation factor GTPase-activating protein AGD12	LOC_Os02g10480	stromal membrane-associated protein
TraesCS1D02G045700	blue	No DEG	AT3G57230	AGL16	Agamous-like MADS-box protein AGL16	LOC_Os02g36924	OsMADS27 - MADS-box family gene with MIKCc type-box
TraesCS2A02G337900	blue	Seedling	AT3G57230	AGL16	Agamous-like MADS-box protein AGL16	LOC_Os02g36924	OsMADS27 - MADS-box family gene with MIKCc type-box
TraesCS6D02G273500	blue	Shared	AT3G57230	AGL16	Agamous-like MADS-box protein AGL16	LOC_Os02g49840	OsMADS57 - MADS-box family gene with MIKCc type-box
TraesCS2B02G344000	blue	No DEG	AT3G57230	AGL16	Agamous-like MADS-box protein AGL16	LOC_Os02g36924	OsMADS27 - MADS-box family gene with MIKCc type-box
TraesCS6B02G322700	blue	Seedling	AT3G57230	AGL16	Agamous-like MADS-box protein AGL16	LOC_Os02g49840	OsMADS57 - MADS-box family gene with MIKCc type-box
TraesCS2D02G325000	blue	No DEG	AT3G57230	AGL16	Agamous-like MADS-box protein AGL16	LOC_Os02g36924	OsMADS27 - MADS-box family gene with MIKCc type-box
TraesCS4B02G351500	blue	Seedling	AT4G22950	AGL19	Agamous-like MADS-box protein AGL19	LOC_Os01g69850	OsMADS65 - MADS-box family gene with MIKC* type-box
TraesCS4D02G346300	blue	No DEG	AT4G22950	AGL19	Agamous-like MADS-box protein AGL19	LOC_Os01g69850	OsMADS65 - MADS-box family gene with MIKC* type-box
TraesCS3D02G427900	blue	Seedling	AT4G22950	AGL19	Agamous-like MADS-box protein AGL19	LOC_Os01g69850	OsMADS65 - MADS-box family gene with MIKC* type-box
TraesCS5A02G520200	blue	Germination	AT4G22950	AGL19	Agamous-like MADS-box protein AGL19	LOC_Os01g69850	OsMADS65 - MADS-box family gene with MIKC* type-box
TraesCS5B02G115100	blue	Seedling	AT2G42830	AGL5	Agamous-like MADS-box protein AGL5	LOC_Os12g10540	OsMADS13 - MADS-box family gene with MIKCc type-box
TraesCS5D02G118200	blue	Seedling	AT2G42830	AGL5	Agamous-like MADS-box protein AGL5	LOC_Os12g10540	OsMADS13 - MADS-box family gene with MIKCc type-box
TraesCS5A02G519200	blue	No DEG	AT3G12740	ALIS1	ALA-interacting subunit 1	LOC_Os03g02830	cell cycle control protein
TraesCS4D02G345100	blue	No DEG	AT3G12740	ALIS1	ALA-interacting subunit 1	LOC_Os03g02830	cell cycle control protein
TraesCS6B02G183800	blue	No DEG	AT1G54320	ALIS3	ALA-interacting subunit 3	LOC_Os02g07750	cell cycle control protein
TraesCS4D02G286900	blue	No DEG	AT4G39660	AGT2	Alanine--glyoxylate aminotransferase 2 homolog 1%2C mitochondrial	LOC_Os03g07570	aminotransferase
TraesCS4B02G106300	blue	Seedling	AT1G77120	ADH1	Alcohol dehydrogenase class-P	LOC_Os11g10510	dehydrogenase
TraesCS4D02G303900	blue	No DEG	AT1G22440		Alcohol dehydrogenase-like 2	LOC_Os03g09020	dehydrogenase
TraesCS6D02G217000	blue	Germination	AT5G24760		Alcohol dehydrogenase-like 6	LOC_Os02g42520	dehydrogenase
TraesCS2D02G094400	blue	No DEG	AT3G66658	ALDH22A1	Aldehyde dehydrogenase 22A1	LOC_Os07g48920	aldehyde dehydrogenase
TraesCS3A02G212300	blue	Shared	AT3G24503	ALDH2C4	Aldehyde dehydrogenase family 2 member C4	LOC_Os01g40870	aldehyde dehydrogenase
TraesCS4A02G219900	blue	No DEG	AT4G34240	ALDH3I1	Aldehyde dehydrogenase family 3 member I1%2C chloroplastic	LOC_Os11g08300	aldehyde dehydrogenase
TraesCS2A02G587900	blue	Germination	AT4G04955	ALN	Allantoinase	LOC_Os04g58390	allantoinase
TraesCS7D02G523900	blue	No DEG	AT1G08065	ACA5	Alpha carbonic anhydrase 5	LOC_Os08g36630	bifunctional monodehydroascorbate reductase and carbonic anhydrasenectarin-3 precursor
TraesCS5D02G234900	blue	Seedling	AT1G74640		alpha/beta-Hydrolases superfamily protein	LOC_Os09g24710	alpha/beta hydrolase fold
TraesCS6B02G191100	blue	No DEG	AT4G17150		alpha/beta-Hydrolases superfamily protein	LOC_Os02g10440	protein with a conserved N-terminal region
TraesCS2D02G185300	blue	No DEG	AT1G13820		alpha/beta-Hydrolases superfamily protein	LOC_Os07g41080	hydrolase
TraesCS3A02G355100	blue	No DEG	AT2G39420		alpha/beta-Hydrolases superfamily protein	LOC_Os01g62010	hydrolase
TraesCS1A02G170600	blue	No DEG	AT3G51000		alpha/beta-Hydrolases superfamily protein	LOC_Os10g35520	hydrolase
TraesCS2D02G519500	blue	No DEG	AT1G52510		alpha/beta-Hydrolases superfamily protein	LOC_Os04g55180	hydrolase
TraesCS3A02G426600	blue	Shared	AT4G12830		alpha/beta-Hydrolases superfamily protein	LOC_Os01g69060	hydrolase
TraesCS1D02G269000	blue	Seedling	AT2G36290		alpha/beta-Hydrolases superfamily protein	LOC_Os04g33590	hydrolase
TraesCS7D02G499500	blue	Germination	AT2G24280		alpha/beta-Hydrolases superfamily protein	LOC_Os06g43930	OsProCP2 - Putative Lysosomal Pro-x Carboxypeptidase homologue
TraesCS3D02G421500	blue	No DEG	AT4G12830		alpha/beta-Hydrolases superfamily protein	LOC_Os01g69060	hydrolase
TraesCS5D02G146200	blue	Shared	AT3G10840		alpha/beta-Hydrolases superfamily protein	LOC_Os12g02589	hydrolase
TraesCS1D02G249100	blue	Germination	AT3G23600		alpha/beta-Hydrolases superfamily protein	LOC_Os05g33100	endo-1
TraesCS3B02G235200	blue	Germination	AT3G47590		alpha/beta-Hydrolases superfamily protein	LOC_Os01g39790	esterase/lipase/thioesterase
TraesCS1B02G243700	blue	Shared	AT2G47630		alpha/beta-Hydrolases superfamily protein	LOC_Os05g29974	lipase
TraesCS7B02G022300	blue	No DEG	AT5G25770		alpha/beta-Hydrolases superfamily protein	LOC_Os06g06770	OsPOP11 - Putative Prolyl Oligopeptidase homologue
TraesCS7A02G298400	blue	No DEG	AT1G32190		alpha/beta-Hydrolases superfamily protein	LOC_Os08g06420	abhydrolase domain-containing protein FAM108C1
TraesCS7B02G188600	blue	No DEG	AT1G32190		alpha/beta-Hydrolases superfamily protein	LOC_Os08g06420	abhydrolase domain-containing protein FAM108C1
TraesCS1B02G260500	blue	Seedling	AT3G23600		alpha/beta-Hydrolases superfamily protein	LOC_Os05g33100	endo-1
TraesCS1D02G262100	blue	Germination	AT5G38520		alpha/beta-Hydrolases superfamily protein	LOC_Os05g34630	hydrolase
TraesCS3B02G462800	blue	Germination	AT4G12830		alpha/beta-Hydrolases superfamily protein	LOC_Os01g69060	hydrolase
TraesCS7D02G294200	blue	Seedling	AT1G32190		alpha/beta-Hydrolases superfamily protein	LOC_Os08g06420	abhydrolase domain-containing protein FAM108C1
TraesCS7A02G510200	blue	Germination	AT2G24280		alpha/beta-Hydrolases superfamily protein	LOC_Os06g43930	OsProCP2 - Putative Lysosomal Pro-x Carboxypeptidase homologue
TraesCS1B02G196900	blue	Shared	AT2G36290		alpha/beta-Hydrolases superfamily protein	LOC_Os10g37720	hydrolase
TraesCS2A02G186600	blue	Germination	AT5G19850		alpha/beta-Hydrolases superfamily protein	LOC_Os07g38830	hydrolase
TraesCS3D02G028200	blue	Shared	AT5G36210		alpha/beta-Hydrolases superfamily protein	LOC_Os06g11180	OsPOP12 - Putative Prolyl Oligopeptidase homologue
TraesCS3A02G233700	blue	Seedling	AT1G15490		alpha/beta-Hydrolases superfamily protein	LOC_Os01g45960	hydrolase
TraesCS1A02G230500	blue	Seedling	AT3G62860		alpha/beta-Hydrolases superfamily protein	LOC_Os05g29974	lipase
TraesCS7A02G523600	blue	No DEG	AT3G23570		alpha/beta-Hydrolases superfamily protein	LOC_Os08g14000	retrotransposon protein
TraesCS1B02G260800	blue	No DEG	AT3G23600		alpha/beta-Hydrolases superfamily protein	LOC_Os05g33200	endo-1
TraesCS1D02G187100	blue	Shared	AT2G36290		alpha/beta-Hydrolases superfamily protein	LOC_Os10g37710	hydrolase
TraesCS6A02G084900	blue	No DEG	AT5G17670		alpha/beta-Hydrolases superfamily protein	LOC_Os02g03720	expressed protein
TraesCS6B02G191000	blue	Seedling	AT2G36290		alpha/beta-Hydrolases superfamily protein	LOC_Os02g32970	hydrolase
TraesCS2A02G517900	blue	No DEG	AT1G52510		alpha/beta-Hydrolases superfamily protein	LOC_Os04g55180	hydrolase
TraesCS5D02G065000	blue	No DEG	AT3G51000		alpha/beta-Hydrolases superfamily protein	LOC_Os12g43970	hydrolase
TraesCS5A02G526300	blue	No DEG	AT2G36290		alpha/beta-Hydrolases superfamily protein	LOC_Os03g02514	hydrolase
TraesCS6D02G152300	blue	Seedling	AT2G36290		alpha/beta-Hydrolases superfamily protein	LOC_Os02g32970	hydrolase
TraesCS6B02G117000	blue	No DEG	AT5G17670		alpha/beta-Hydrolases superfamily protein	LOC_Os02g03720	expressed protein
TraesCS5A02G146000	blue	Shared	AT3G10840		alpha/beta-Hydrolases superfamily protein	LOC_Os12g02589	hydrolase
TraesCS1D02G249700	blue	Germination	AT3G23570		alpha/beta-Hydrolases superfamily protein	LOC_Os05g33200	endo-1
TraesCS1B02G260400	blue	Seedling	AT3G23600		alpha/beta-Hydrolases superfamily protein	LOC_Os05g33100	endo-1
TraesCS1A02G249600	blue	No DEG	AT3G23600		alpha/beta-Hydrolases superfamily protein	LOC_Os05g33100	endo-1
TraesCS2B02G546500	blue	Germination	AT1G52510		alpha/beta-Hydrolases superfamily protein	LOC_Os04g55180	hydrolase
TraesCS5A02G227500	blue	No DEG	AT1G74640		alpha/beta-Hydrolases superfamily protein	LOC_Os09g24710	alpha/beta hydrolase fold
TraesCS3D02G248000	blue	Seedling	AT1G69830	AMY3	Alpha-amylase 3%2C chloroplastic	LOC_Os01g51754	alpha-amylase precursor
TraesCS3B02G276700	blue	Seedling	AT1G69830	AMY3	Alpha-amylase 3%2C chloroplastic	LOC_Os01g51754	alpha-amylase precursor
TraesCS3A02G248000	blue	Seedling	AT1G69830	AMY3	Alpha-amylase 3%2C chloroplastic	LOC_Os01g51754	alpha-amylase precursor
TraesCS5D02G183700	blue	Seedling	AT3G01420	DOX1	Alpha-dioxygenase 1	LOC_Os12g26290	alpha-DOX2
TraesCS5A02G395200	blue	No DEG	AT3G29320	PHS1	Alpha-glucan phosphorylase 1	LOC_Os03g55090	alpha-glucan phosphorylast isozyme
TraesCS5D02G404500	blue	No DEG	AT3G29320	PHS1	Alpha-glucan phosphorylase 1	LOC_Os03g55090	alpha-glucan phosphorylast isozyme
TraesCS5B02G400000	blue	Seedling	AT3G29320	PHS1	Alpha-glucan phosphorylase 1	LOC_Os03g55090	alpha-glucan phosphorylast isozyme
TraesCS3B02G398000	blue	No DEG	AT3G46970	PHS2	Alpha-glucan phosphorylase 2%2C cytosolic	LOC_Os01g63270	alpha-glucan phosphorylast isozyme
TraesCS7D02G235200	blue	No DEG	AT1G10760	GWD1	Alpha-glucan water dikinase 1%2C chloroplastic	LOC_Os06g30310	alpha-glucan water dikinase
TraesCS7B02G133400	blue	No DEG	AT1G10760	GWD1	Alpha-glucan water dikinase 1%2C chloroplastic	LOC_Os06g30310	alpha-glucan water dikinase
TraesCS7A02G235200	blue	Seedling	AT1G10760	GWD1	Alpha-glucan water dikinase 1%2C chloroplastic	LOC_Os06g30310	alpha-glucan water dikinase
TraesCS2D02G573300	blue	Germination	AT1G08980	AMI1	Amidase 1	LOC_Os04g02780	amidase family protein
TraesCS3B02G581900	blue	No DEG	AT3G18680		Amino acid kinase family protein	LOC_Os01g73450	amino acid kinase
TraesCS7D02G189000	blue	Seedling	AT5G49630	AAP6	Amino acid permease 6	LOC_Os01g66010	amino acid transporter
TraesCS3A02G484900	blue	Germination	AT2G01170	BAT1	Amino-acid permease BAT1	LOC_Os01g71760	amino acid permease family protein
TraesCS3B02G531700	blue	Germination	AT2G01170	BAT1	Amino-acid permease BAT1	LOC_Os01g71740	amino acid permease family protein
TraesCS3D02G480100	blue	Germination	AT2G01170	BAT1	Amino-acid permease BAT1	LOC_Os01g71740	amino acid permease family protein
TraesCS2D02G304300	blue	Seedling	AT2G01170	BAT1	Amino-acid permease BAT1	LOC_Os04g35540	amino acid permease family protein
TraesCS2D02G467900	blue	Seedling	AT1G11860	GDCST	Aminomethyltransferase%2C mitochondrial	LOC_Os04g53230	aminomethyltransferase
TraesCS2B02G490900	blue	Seedling	AT1G11860	GDCST	Aminomethyltransferase%2C mitochondrial	LOC_Os04g53230	aminomethyltransferase
TraesCS2A02G467900	blue	Seedling	AT1G11860	GDCST	Aminomethyltransferase%2C mitochondrial	LOC_Os04g53230	aminomethyltransferase
TraesCS5B02G189600	blue	No DEG	AT4G33090	APM1	Aminopeptidase M1	LOC_Os09g19790	puromycin-sensitive aminopeptidase
TraesCS5A02G194100	blue	No DEG	AT4G33090	APM1	Aminopeptidase M1	LOC_Os09g19790	puromycin-sensitive aminopeptidase
TraesCS5D02G196600	blue	No DEG	AT4G33090	APM1	Aminopeptidase M1	LOC_Os09g19790	puromycin-sensitive aminopeptidase
[truncated: 51,940 more rows]

## Sheet: Sheet2
	The annotation of 432 hub genes in turquoise module.
Gene ID	Annotation
	The homologous genes and corresponding descriptions in Arabidopsis thaliana			The homologous genes and corresponding descriptions in Oryza sativa
TraesCS1A02G023300	AT3G19430		late embryogenesis abundant protein-related / LEA protein-related	LOC_Os05g01680	RCLEA7 - Root cap and Late embryogenesis related family protein precursor
TraesCS1A02G078100	AT5G05340	PER52	Peroxidase 52	LOC_Os05g04470	peroxidase precursor
TraesCS1A02G111500	AT1G06980		unknown protein%3B FUNCTIONS IN: molecular_function unknown%3B INVOLVED IN: biological_process unknown%3B LOCATED IN: endomembrane system%3B EXPRESSED IN: sepal%2C male gametophyte%2C carpel%3B EXPRESSED DURING: 4 anthesis%3B BEST Arabidopsis thaliana protein match /.../nknown protein (TAIR:AT2G30230.1)%3B Has 159 Blast hits to 159 proteins in 13 species: Archae - 0%3B Bacteria - 0%3B Metazoa - 0…	LOC_Os05g07240	expressed protein
TraesCS1A02G113800	AT5G56040		Leucine-rich receptor-like protein kinase family protein	LOC_Os05g07740	receptor-like protein kinase 2 precursor
TraesCS1A02G124600	AT5G19760	DTC	Mitochondrial dicarboxylate/tricarboxylate transporter DTC	LOC_Os05g11780	mitochondrial carrier protein
TraesCS1A02G144500	AT2G20370	KAM1	Xyloglucan galactosyltransferase KATAMARI1	LOC_Os10g32110	exostosin family domain containing protein
TraesCS1A02G160700	AT4G33630	EX1	Protein EXECUTER 1%2C chloroplastic	LOC_Os10g34400	expressed protein
TraesCS1A02G176000	AT4G12420	SKU5	Monocopper oxidase-like protein SKU5	LOC_Os10g36390	monocopper oxidase
TraesCS1A02G177000	AT1G33260		Probable receptor-like protein kinase At1g33260	LOC_Os10g37190	protein kinase domain containing protein
TraesCS1A02G194200	AT4G17940		Tetratricopeptide repeat (TPR)-like superfamily protein	LOC_Os10g42610	expressed protein
TraesCS1A02G209800	AT4G12470	AZI1	pEARLI1-like lipid transfer protein 1	LOC_Os10g40440	LTPL140 - Protease inhibitor/seed storage/LTP family protein precursor
TraesCS1A02G212600	AT1G65680	EXPB2	Putative expansin-B2	LOC_Os10g40730	expansin precursor
TraesCS1A02G244300	AT5G26230	MAKR1	Probable membrane-associated kinase regulator 1	LOC_Os05g32440	expressed protein
TraesCS1A02G264000	AT1G44900	MCM2	DNA replication licensing factor MCM2	LOC_Os11g29380	MCM2 - Putative minichromosome maintenance MCM complex subunit 2
TraesCS1A02G299500	AT5G46280	MCM3	DNA replication licensing factor MCM3	LOC_Os05g39850	MCM3 - Putative minichromosome maintenance MCM complex subunit 3
TraesCS1A02G311000	AT2G25520		Probable sugar phosphate/phosphate translocator At2g25520	LOC_Os05g41480	domain of unknown function
TraesCS1A02G378000	AT1G18080	RACK1A	Receptor for activated C kinase 1A	LOC_Os01g49290	WD repeat-containing protein
TraesCS1A02G379000	AT5G08670		ATP synthase alpha/beta family protein	LOC_Os01g49190	ATP synthase
TraesCS1A02G396800	AT5G60490	FLA12	Fasciclin-like arabinogalactan protein 12	LOC_Os05g48900	fasciclin domain containing protein
TraesCS1B02G042200
TraesCS1B02G104600	AT4G02920		unknown protein%3B BEST Arabidopsis thaliana protein match is: unknown protein (TAIR:AT1G03340.1)%3B Has 41 Blast hits to 41 proteins in 12 species: Archae - 0%3B Bacteria - 0%3B Metazoa - 0%3B Fungi - 0%3B Plants - 41%3B Viruses - 0%3B Other Eukaryotes - 0 (source /.../ BLink).	LOC_Os05g05140	expressed protein
TraesCS1B02G218300	AT1G20330	SMT2	24-methylenesterol C-methyltransferase 2	LOC_Os03g04340	C-methyltransferase
TraesCS1B02G226100	AT1G65680	EXPB2	Putative expansin-B2	LOC_Os10g40730	expansin precursor
TraesCS1B02G228900	AT4G17140		pleckstrin homology (PH) domain-containing protein	LOC_Os10g41560	expressed protein
TraesCS1B02G274600	AT1G44900	MCM2	DNA replication licensing factor MCM2	LOC_Os11g29380	MCM2 - Putative minichromosome maintenance MCM complex subunit 2
TraesCS1B02G309300	AT5G46280	MCM3	DNA replication licensing factor MCM3	LOC_Os05g39850	MCM3 - Putative minichromosome maintenance MCM complex subunit 3
TraesCS1B02G320800	AT2G29550	TUBB7	Tubulin beta-7 chain	LOC_Os03g56810	tubulin/FtsZ domain containing protein
TraesCS1B02G398800	AT1G18080	RACK1A	Receptor for activated C kinase 1A	LOC_Os01g49290	WD repeat-containing protein
TraesCS1B02G416600	AT5G22880	H2B	Histone H2B.10	LOC_Os01g05610	Core histone H2A/H2B/H3/H4 domain containing protein
TraesCS1B02G424900	AT5G03170	FLA11	Fasciclin-like arabinogalactan protein 11	LOC_Os05g48890	fasciclin domain containing protein
TraesCS1B02G425000	AT5G03170	FLA11	Fasciclin-like arabinogalactan protein 11	LOC_Os05g48900	fasciclin domain containing protein
TraesCS1D02G022800	AT3G19430		late embryogenesis abundant protein-related / LEA protein-related	LOC_Os05g01680	RCLEA7 - Root cap and Late embryogenesis related family protein precursor
TraesCS1D02G034800
TraesCS1D02G067200	AT3G53380	LECRK81	L-type lectin-domain containing receptor kinase VIII.1	LOC_Os05g03450	lectin protein kinase family protein
TraesCS1D02G112900	AT2G30230		unknown protein%3B FUNCTIONS IN: molecular_function unknown%3B INVOLVED IN: biological_process unknown%3B LOCATED IN: endomembrane system%3B BEST Arabidopsis thaliana protein match is: unknown protein (TAIR:AT1G06980.1)%3B Has 167 Blast hits to 167 proteins i /.../pecies: Archae - 0%3B Bacteria - 0%3B Metazoa - 0%3B Fungi - 0%3B Plants - 167%3B Viruses - 0%3B Other Eukaryotes - 0 (source: NCBI BL…	LOC_Os05g07240	expressed protein
TraesCS1D02G115400	AT5G56040		Leucine-rich receptor-like protein kinase family protein	LOC_Os05g07740	receptor-like protein kinase 2 precursor
TraesCS1D02G115500	AT1G23340		Protein of Unknown Function (DUF239)	LOC_Os05g07764	carboxyl-terminal proteinase
TraesCS1D02G127800	AT1G17620		Late embryogenesis abundant (LEA) hydroxyproline-rich glycoprotein family	LOC_Os05g11010	harpin-induced protein 1 domain containing protein
TraesCS1D02G143300
TraesCS1D02G162800	AT4G12420	SKU5	Monocopper oxidase-like protein SKU5	LOC_Os10g36390	monocopper oxidase
TraesCS1D02G208000	AT1G20330	SMT2	24-methylenesterol C-methyltransferase 2	LOC_Os03g04340	C-methyltransferase
TraesCS1D02G215500	AT1G65680	EXPB2	Putative expansin-B2	LOC_Os10g40730	expansin precursor
TraesCS1D02G223200	AT2G45050	GATA2	GATA transcription factor 2	LOC_Os10g40810	GATA zinc finger domain containing protein
TraesCS1D02G226900	AT1G02610		RING/FYVE/PHD zinc finger superfamily protein	LOC_Os05g28730	zinc finger
TraesCS1D02G229400	AT5G41880	POLA3	DNA primases%3BDNA primases	LOC_Os05g29010	POLA4 - Putative DNA polymerase alpha complex subunit
TraesCS1D02G264100	AT1G44900	MCM2	DNA replication licensing factor MCM2	LOC_Os11g29380	MCM2 - Putative minichromosome maintenance MCM complex subunit 2
TraesCS1D02G309200	AT2G29550	TUBB7	Tubulin beta-7 chain	LOC_Os03g56810	tubulin/FtsZ domain containing protein
TraesCS1D02G334400	AT4G07960	CSLC12	Probable xyloglucan glycosyltransferase 12	LOC_Os05g43530	CSLC7 - cellulose synthase-like family C
TraesCS1D02G404700	AT5G03170	FLA11	Fasciclin-like arabinogalactan protein 11	LOC_Os05g48900	fasciclin domain containing protein
TraesCS2A02G004900	AT3G14460		Putative disease resistance protein At3g14460	LOC_Os06g49380	NBS-LRR disease resistance protein
TraesCS2A02G012900	AT3G24240	RCH2	Receptor-like protein kinase 2	LOC_Os04g04330	receptor-like protein kinase 2 precursor
TraesCS2A02G026600	AT1G76680	OPR1	12-oxophytodienoate reductase 1	LOC_Os06g11240	12-oxophytodienoate reductase
TraesCS2A02G051600	AT5G54160	OMT1	Flavone 3'-O-methyltransferase 1	LOC_Os08g06100	O-methyltransferase
TraesCS2A02G065700	AT2G16850	PIP2-8	Probable aquaporin PIP2-8	LOC_Os04g16450	aquaporin protein
TraesCS2A02G095200	AT4G02100		Heat shock protein DnaJ with tetratricopeptide repeat	LOC_Os07g49000	DNAJ heat shock N-terminal domain-containing protein
TraesCS2A02G167400	AT4G33160	FBX13	F-box only protein 13	LOC_Os07g42590	OsFBX258 - F-box domain containing protein
TraesCS2A02G192600	AT4G37650	SHR	Protein SHORT-ROOT	LOC_Os07g39820	SHR
TraesCS2A02G194900	AT3G19540		Protein of unknown function (DUF620)	LOC_Os07g40150	expressed protein
TraesCS2A02G199600	AT5G06870	PGIP2	Polygalacturonase inhibitor 2	LOC_Os07g38130	polygalacturonase inhibitor 1 precursor
TraesCS2A02G205700	AT4G27350		Protein of unknown function (DUF1223)	LOC_Os07g37310	uncharacterized secreted protein
TraesCS2A02G214700	AT1G54690	HTA3	Probable histone H2AXb	LOC_Os07g36130	core histone H2A/H2B/H3/H4
TraesCS2A02G235900	AT5G49160	DMT1	DNA (cytosine-5)-methyltransferase 1	LOC_Os07g08500	C-5 cytosine-specific DNA methylase
TraesCS2A02G248800	AT2G35860	FLA16	Fasciclin-like arabinogalactan protein 16	LOC_Os07g06680	fasciclin domain containing protein
TraesCS2A02G253500	AT4G20940		Leucine-rich receptor-like protein kinase family protein	LOC_Os07g05190	leucine-rich repeat family protein
TraesCS2A02G258600	AT2G32300	UCC1	uclacyanin 1	LOC_Os07g01440	plastocyanin-like domain containing protein
TraesCS2A02G259900	AT5G42510	DIR1	Dirigent protein 1	LOC_Os07g01660	dirigent
TraesCS2A02G262400	AT2G27035	ENODL20	early nodulin-like protein 20	LOC_Os07g02200	plastocyanin-like domain containing protein
TraesCS2A02G264900	AT5G66920	sks17	SKU5 similar 17	LOC_Os07g02810	L-ascorbate oxidase homolog precursor
TraesCS2A02G291400	AT3G06868		unknown protein%3B FUNCTIONS IN: molecular_function unknown%3B INVOLVED IN: biological_process unknown%3B LOCATED IN: cellular_component unknown%3B BEST Arabidopsis thaliana protein match is: unknown protein (TAIR:AT5G49100.1)%3B Has 30201 Blast hits to 17322 /.../ins in 780 species: Archae - 12%3B Bacteria - 1396%3B Metazoa - 17338%3B Fungi - 3422%3B Plants - 5037%3B Viruses - 0%3B Other Eukaryo…	LOC_Os04g33260	expressed protein
TraesCS2A02G297700	AT5G22200		Late embryogenesis abundant (LEA) hydroxyproline-rich glycoprotein family	LOC_Os04g33990	harpin-induced protein 1 domain containing protein
TraesCS2A02G324000	AT1G24530		Transducin/WD40 repeat-like superfamily protein	LOC_Os04g40560	WD domain
TraesCS2A02G344300	AT3G28860	ABCB19	ABC transporter B family member 19	LOC_Os04g38570	multidrug resistance protein
TraesCS2A02G379900	AT3G53420	PIP2-1	Aquaporin PIP2-1	LOC_Os04g44060	aquaporin protein
TraesCS2A02G397200	AT4G36180		Probable LRR receptor-like serine/threonine-protein kinase At4g36180	LOC_Os04g48760	leucine-rich repeat family protein
TraesCS2A02G484100	AT4G03210	XTH9	Xyloglucan endotransglucosylase/hydrolase protein 9	LOC_Os04g53950	glycosyl hydrolases family 16 protein
TraesCS2A02G489600	AT4G13940	SAHH1	Adenosylhomocysteinase 1	LOC_Os11g26850	erythronate-4-phosphate dehydrogenase
TraesCS2A02G502100	AT4G30170	PER45	Peroxidase 45	LOC_Os04g56180	peroxidase precursor
TraesCS2A02G523300	AT3G19620	BXL5	Probable beta-D-xylosidase 5	LOC_Os11g19210	beta-D-xylosidase
TraesCS2A02G571500	AT1G71695	PER12	Peroxidase 12	LOC_Os04g59260	peroxidase precursor
TraesCS2A02G574400	AT1G71695	PER12	Peroxidase 12	LOC_Os04g59150	peroxidase precursor
TraesCS2B02G005000	AT3G24240	RCH2	Receptor-like protein kinase 2	LOC_Os04g04330	receptor-like protein kinase 2 precursor
TraesCS2B02G119700	AT5G05170	CESA3	Cellulose synthase A catalytic subunit 3	LOC_Os07g10770	CESA8 - cellulose synthase
TraesCS2B02G170800	AT1G31550		GDSL esterase/lipase At1g31550	LOC_Os07g44780	GDSL-like lipase/acylhydrolase
TraesCS2B02G175000
TraesCS2B02G175100
TraesCS2B02G226900	AT5G06870	PGIP2	Polygalacturonase inhibitor 2	LOC_Os07g38130	polygalacturonase inhibitor 1 precursor
TraesCS2B02G260800	AT5G49160	DMT1	DNA (cytosine-5)-methyltransferase 1	LOC_Os07g08500	C-5 cytosine-specific DNA methylase
TraesCS2B02G273100	AT4G20940		Leucine-rich receptor-like protein kinase family protein	LOC_Os07g05190	leucine-rich repeat family protein
TraesCS2B02G277200	AT5G66920	sks17	SKU5 similar 17	LOC_Os07g02810	L-ascorbate oxidase homolog precursor
TraesCS2B02G279700	AT2G27035	ENODL20	early nodulin-like protein 20	LOC_Os07g02200	plastocyanin-like domain containing protein
TraesCS2B02G284700	AT2G32300	UCC1	uclacyanin 1	LOC_Os07g01440	plastocyanin-like domain containing protein
TraesCS2B02G313900	AT5G22200		Late embryogenesis abundant (LEA) hydroxyproline-rich glycoprotein family	LOC_Os04g33990	harpin-induced protein 1 domain containing protein
TraesCS2B02G341800	AT3G28860	ABCB19	ABC transporter B family member 19	LOC_Os04g38570	multidrug resistance protein
TraesCS2B02G370200	AT3G07570		Cytochrome b561 and DOMON domain-containing protein At3g07570	LOC_Os04g41810	expressed protein
TraesCS2B02G382000	AT2G29570	PCNA2	Proliferating cell nuclear antigen 2	LOC_Os02g56130	PCNA - Putative DNA replicative polymerase clamp
TraesCS2B02G416400	AT3G60900	FLA10	Fasciclin-like arabinogalactan protein 10	LOC_Os04g48490	fasciclin-like arabinogalactan protein
TraesCS2B02G418900	AT4G23060	IQD22	IQ-domain 22	LOC_Os04g48160	IQ calmodulin-binding motif family protein
TraesCS2B02G470600	AT4G17800	AHL23	AT-hook motif nuclear-localized protein 23	LOC_Os04g50030	DNA binding protein
TraesCS2B02G490200	AT5G67150		HXXXD-type acyl-transferase family protein	LOC_Os08g01980	transferase family protein
TraesCS2B02G510200	AT4G03210	XTH9	Xyloglucan endotransglucosylase/hydrolase protein 9	LOC_Os04g53950	glycosyl hydrolases family 16 protein
TraesCS2B02G551700
TraesCS2B02G553100	AT1G02640	BXL2	Probable beta-D-xylosidase 2	LOC_Os11g19210	beta-D-xylosidase
TraesCS2B02G593500	AT2G20780	PLT4	Probable polyol transporter 4	LOC_Os04g58220	transporter family protein
TraesCS2B02G613500	AT1G71695	PER12	Peroxidase 12	LOC_Os04g59150	peroxidase precursor
TraesCS2B02G615800	AT1G71695	PER12	Peroxidase 12	LOC_Os04g59260	peroxidase precursor
TraesCS2D02G012100	AT1G04180	YUC9	Probable indole-3-pyruvate monooxygenase YUCCA9	LOC_Os04g03980	flavin monooxygenase
TraesCS2D02G013700	AT3G24240	RCH2	Receptor-like protein kinase 2	LOC_Os04g04330	receptor-like protein kinase 2 precursor
TraesCS2D02G028600	AT1G76680	OPR1	12-oxophytodienoate reductase 1	LOC_Os06g11290	12-oxophytodienoate reductase
TraesCS2D02G059400	AT3G56870		unknown protein%3B Has 204 Blast hits to 201 proteins in 58 species: Archae - 0%3B Bacteria - 10%3B Metazoa - 72%3B Fungi - 8%3B Plants - 41%3B Viruses - 0%3B Other Eukaryotes - 73 (source: NCBI BLink).	LOC_Os03g39740	expressed protein
TraesCS2D02G063900	AT2G16850	PIP2-8	Probable aquaporin PIP2-8	LOC_Os04g16450	aquaporin protein
TraesCS2D02G111400	AT3G62830	UXS2	UDP-glucuronic acid decarboxylase 2	LOC_Os07g47700	NAD dependent epimerase/dehydratase family domain containing protein
TraesCS2D02G154900
TraesCS2D02G155000
TraesCS2D02G198800	AT3G18830	PLT5	Polyol transporter 5	LOC_Os07g39360	transporter family protein
TraesCS2D02G203000	AT3G13510		Protein of Unknown Function (DUF239)	LOC_Os07g38590	carboxyl-terminal peptidase
TraesCS2D02G207200	AT5G06870	PGIP2	Polygalacturonase inhibitor 2	LOC_Os07g38130	polygalacturonase inhibitor 1 precursor
TraesCS2D02G241800	AT5G49160	DMT1	DNA (cytosine-5)-methyltransferase 1	LOC_Os07g08500	C-5 cytosine-specific DNA methylase
TraesCS2D02G261600	AT2G27035	ENODL20	early nodulin-like protein 20	LOC_Os07g02200	plastocyanin-like domain containing protein
TraesCS2D02G264900	AT2G32300	UCC1	uclacyanin 1	LOC_Os07g01440	plastocyanin-like domain containing protein
TraesCS2D02G291400	AT3G19430		late embryogenesis abundant protein-related / LEA protein-related	LOC_Os04g33520	RCLEA6 - Root cap and Late embryogenesis related family protein precursor
TraesCS2D02G295700	AT5G22200		Late embryogenesis abundant (LEA) hydroxyproline-rich glycoprotein family	LOC_Os04g33990	harpin-induced protein 1 domain containing protein
TraesCS2D02G314900	AT5G67030	ZEP	Zeaxanthin epoxidase%2C chloroplastic	LOC_Os04g37619	zeaxanthin epoxidase
TraesCS2D02G322600	AT3G28860	ABCB19	ABC transporter B family member 19	LOC_Os04g38570	multidrug resistance protein
TraesCS2D02G350200	AT3G07570		Cytochrome b561 and DOMON domain-containing protein At3g07570	LOC_Os04g41810	expressed protein
TraesCS2D02G395000	AT4G36180		Probable LRR receptor-like serine/threonine-protein kinase At4g36180	LOC_Os04g48760	leucine-rich repeat family protein
TraesCS2D02G398300	AT4G23060	IQD22	IQ-domain 22	LOC_Os04g48160	IQ calmodulin-binding motif family protein
TraesCS2D02G467400	AT5G67150		HXXXD-type acyl-transferase family protein	LOC_Os08g01980	transferase family protein
TraesCS2D02G484000	AT4G03210	XTH9	Xyloglucan endotransglucosylase/hydrolase protein 9	LOC_Os04g53950	glycosyl hydrolases family 16 protein
TraesCS2D02G521300	AT3G19010		2-oxoglutarate (2OG) and Fe(II)-dependent oxygenase superfamily protein	LOC_Os04g55070	gibberellin 20 oxidase 2
TraesCS2D02G525300	AT1G02640	BXL2	Probable beta-D-xylosidase 2	LOC_Os11g19210	beta-D-xylosidase
TraesCS2D02G546500	AT1G56340	CRT1	Calreticulin-1	LOC_Os07g14270	calreticulin precursor protein
TraesCS2D02G582200	AT1G45688		unknown protein%3B FUNCTIONS IN: molecular_function unknown%3B INVOLVED IN: biological_process unknown%3B LOCATED IN: plasma membrane%3B EXPRESSED IN: 22 plant structures%3B EXPRESSED DURING: 13 growth stages%3B BEST Arabidopsis thaliana protein match is: unkno /.../tein (TAIR:AT5G42860.1)%3B Has 35333 Blast hits to 34131 proteins in 2444 species: Archae - 798%3B Bacteria - 22429%3B Metazoa - 974…	LOC_Os04g59330	expressed protein
TraesCS2D02G582900	AT1G71695	PER12	Peroxidase 12	LOC_Os04g59260	peroxidase precursor
TraesCS2D02G583100	AT1G71695	PER12	Peroxidase 12	LOC_Os04g59260	peroxidase precursor
TraesCS3A02G048400	AT4G01070	UGT72B1	UDP-glycosyltransferase 72B1	LOC_Os11g38650	UDP-glucoronosyl/UDP-glucosyl transferase
TraesCS3A02G092300	AT5G56040		Leucine-rich receptor-like protein kinase family protein	LOC_Os01g07560	receptor-like protein kinase 2 precursor
TraesCS3A02G097200	AT2G40550	ETG1	Mini-chromosome maintenance complex-binding protein	LOC_Os01g07260	expressed protein
TraesCS3A02G123600	AT1G52780		Protein of unknown function (DUF2921)	LOC_Os01g08170	expressed protein
TraesCS3A02G151200	AT4G23630	RTNLB1	Reticulon-like protein B1	LOC_Os01g12650	reticulon domain containing protein
TraesCS3A02G193600	AT2G01110	TATC	Sec-independent protein translocase protein TATC%2C chloroplastic	LOC_Os01g31680	uncharacterized protein sll0194
TraesCS3A02G200400	AT2G16440	MCM4	DNA replication licensing factor MCM4	LOC_Os01g36390	MCM4 - Putative minichromosome maintenance MCM complex subunit 4
TraesCS3A02G214100	AT1G01300		Eukaryotic aspartyl protease family protein	LOC_Os01g41550	aspartic proteinase
TraesCS3A02G232200				LOC_Os01g45700	expressed protein
TraesCS3A02G274200	AT2G20680	MAN2	Mannan endo-1%2C4-beta-mannosidase 2	LOC_Os01g54300	OsMan02 - Endo-Beta-Mannanase
TraesCS3A02G293700	AT3G58120	BZIP61	Basic leucine zipper 61	LOC_Os01g55150	bZIP transcription factor domain containing protein
TraesCS3A02G294300	AT1G29980		Protein of unknown function%2C DUF642	LOC_Os01g55190	expressed protein
TraesCS3A02G324100	AT2G23170	GH3.3	Indole-3-acetic acid-amido synthetase GH3.3	LOC_Os07g40290	OsGH3.8 - Probable indole-3-acetic acid-amido synthetase
TraesCS3A02G357400	AT5G22880	H2B	Histone H2B.10	LOC_Os08g38300	Core histone H2A/H2B/H3/H4 domain containing protein
TraesCS3A02G367900	AT2G39980		HXXXD-type acyl-transferase family protein	LOC_Os01g63480	transferase family protein
TraesCS3A02G368400	AT2G38110	GPAT6	Glycerol-3-phosphate 2-O-acyltransferase 6	LOC_Os01g63580	glycerol-3-phosphate acyltransferase
TraesCS3A02G386300	AT4G26140	BGAL12	Beta-galactosidase 12	LOC_Os03g15020	beta-galactosidase precursor
TraesCS3A02G406100	AT1G29470		Probable methyltransferase PMT24	LOC_Os04g59590	methyltransferase
TraesCS3A02G411700	AT1G03230		Eukaryotic aspartyl protease family protein	LOC_Os01g71090	xylanase inhibitor
TraesCS3A02G415300	AT1G52910		Protein of unknown function (DUF1218)	LOC_Os07g27810	fiber protein Fb34
TraesCS3A02G468500	AT1G03230		Eukaryotic aspartyl protease family protein	LOC_Os01g71060	xylanase inhibitor
TraesCS3A02G497200
TraesCS3A02G520600	AT1G08200	AXS2	UDP-D-apiose/UDP-D-xylose synthase 2	LOC_Os01g73790	NAD dependent epimerase/dehydratase family protein
TraesCS3B02G033400	AT4G01070	UGT72B1	UDP-glycosyltransferase 72B1	LOC_Os11g38650	UDP-glucoronosyl/UDP-glucosyl transferase
TraesCS3B02G107600	AT4G26540		Probable LRR receptor-like serine/threonine-protein kinase At4g26540	LOC_Os01g07560	receptor-like protein kinase 2 precursor
TraesCS3B02G108700	AT5G57550	XTH25	Probable xyloglucan endotransglucosylase/hydrolase protein 25	LOC_Os08g13920	glycosyl hydrolases family 16
TraesCS3B02G112900	AT2G40550	ETG1	Mini-chromosome maintenance complex-binding protein	LOC_Os01g07260	expressed protein
TraesCS3B02G120900	AT3G14880		BEST Arabidopsis thaliana protein match is: transcription factor-related (TAIR:AT4G18650.1)%3B Has 560 Blast hits to 560 proteins in 40 species: Archae - 0%3B Bacteria - 0%3B Metazoa - 2%3B Fungi - 0%3B Plants - 558%3B Viruses - 0%3B Other Eukaryotes - 0 (source: /.../BLink).	LOC_Os01g06560	transcription factor HBP-1b
TraesCS3B02G161600	AT5G53440		unknown protein%3B FUNCTIONS IN: molecular_function unknown%3B INVOLVED IN: biological_process unknown%3B LOCATED IN: cytosol%3B EXPRESSED IN: 25 plant structures%3B EXPRESSED DURING: 15 growth stages%3B Has 1807 Blast hits to 1807 proteins in 277 species: Arch /.../%3B Bacteria - 0%3B Metazoa - 736%3B Fungi - 347%3B Plants - 385%3B Viruses - 0%3B Other Eukaryotes - 339 (source: NCBI BLink).	LOC_Os01g46710	transposon protein
TraesCS3B02G199900	AT1G69530	EXPA1	Expansin-A1	LOC_Os01g14650	expansin precursor
TraesCS3B02G211400	AT1G74470	CHLP	Geranylgeranyl diphosphate reductase%2C chloroplastic	LOC_Os01g16020	FAD binding domain containing protein
TraesCS3B02G224600	AT2G16440	MCM4	DNA replication licensing factor MCM4	LOC_Os01g36390	MCM4 - Putative minichromosome maintenance MCM complex subunit 4
TraesCS3B02G233000	AT4G32940	GAMMA-VPE	Vacuolar-processing enzyme gamma-isozyme	LOC_Os01g37910	vacuolar-processing enzyme precursor
TraesCS3B02G263300	AT4G19460		UDP-Glycosyltransferase superfamily protein	LOC_Os01g46430	glycosyl transferase
TraesCS3B02G400000	AT2G38110	GPAT6	Glycerol-3-phosphate 2-O-acyltransferase 6	LOC_Os01g63580	glycerol-3-phosphate acyltransferase
TraesCS3B02G421200	AT4G15093	LIGB	Extradiol ring-cleavage dioxygenase	LOC_Os01g65680	4
TraesCS3B02G445200	AT1G03230		Eukaryotic aspartyl protease family protein	LOC_Os01g71090	xylanase inhibitor
TraesCS3B02G450500	AT1G52910		Protein of unknown function (DUF1218)	LOC_Os07g27810	fiber protein Fb34
TraesCS3B02G454900	AT5G55450		Bifunctional inhibitor/lipid-transfer protein/seed storage 2S albumin superfamily protein	LOC_Os01g68580	LTPL38 - Protease inhibitor/seed storage/LTP family protein precursor
TraesCS3B02G510300	AT1G03230		Eukaryotic aspartyl protease family protein	LOC_Os01g71060	xylanase inhibitor
TraesCS3B02G515500	AT1G03230		Eukaryotic aspartyl protease family protein	LOC_Os01g71090	xylanase inhibitor
TraesCS3D02G026100	AT2G20370	KAM1	Xyloglucan galactosyltransferase KATAMARI1	LOC_Os10g32080	xyloglucan galactosyltransferase KATAMARI1
TraesCS3D02G031800	AT1G71695	PER12	Peroxidase 12	LOC_Os04g59150	peroxidase precursor
TraesCS3D02G038300	AT1G68560	XYL1	Alpha-xylosidase 1	LOC_Os01g03950	glycosyl hydrolase
TraesCS3D02G092600	AT4G26540		Probable LRR receptor-like serine/threonine-protein kinase At4g26540	LOC_Os01g07560	receptor-like protein kinase 2 precursor
TraesCS3D02G097700	AT2G40550	ETG1	Mini-chromosome maintenance complex-binding protein	LOC_Os01g07260	expressed protein
TraesCS3D02G117300	AT1G71710		DNAse I-like superfamily protein	LOC_Os01g08780	endonuclease/exonuclease/phosphatase family domain containing protein
TraesCS3D02G159100	AT4G23630	RTNLB1	Reticulon-like protein B1	LOC_Os01g12650	reticulon domain containing protein
TraesCS3D02G185100	AT2G18150	PER15	Peroxidase 15	LOC_Os01g15830	peroxidase precursor
TraesCS3D02G186200	AT1G74470	CHLP	Geranylgeranyl diphosphate reductase%2C chloroplastic	LOC_Os01g16020	FAD binding domain containing protein
TraesCS3D02G189900	AT2G39040	PER24	Peroxidase 24	LOC_Os01g16450	peroxidase precursor
TraesCS3D02G203400	AT2G16440	MCM4	DNA replication licensing factor MCM4	LOC_Os01g36390	MCM4 - Putative minichromosome maintenance MCM complex subunit 4
TraesCS3D02G234500	AT1G48480	RKL1	Probable inactive receptor kinase At1g48480	LOC_Os01g42294	inactive receptor kinase At2g26730 precursor
TraesCS3D02G236900	AT4G19460		UDP-Glycosyltransferase superfamily protein	LOC_Os01g46430	glycosyl transferase
TraesCS3D02G294100	AT1G29980		Protein of unknown function%2C DUF642	LOC_Os01g55190	expressed protein
TraesCS3D02G343800	AT4G04770	ABCI8	UPF0051 protein ABCI8%2C chloroplastic	LOC_Os01g61400	sufB/sufD domain containing protein
TraesCS3D02G361300	AT2G38110	GPAT6	Glycerol-3-phosphate 2-O-acyltransferase 6	LOC_Os01g63580	glycerol-3-phosphate acyltransferase
TraesCS3D02G405900	AT1G03230		Eukaryotic aspartyl protease family protein	LOC_Os01g71090	xylanase inhibitor
TraesCS3D02G461400	AT1G03230		Eukaryotic aspartyl protease family protein	LOC_Os01g71060	xylanase inhibitor
TraesCS3D02G467200	AT1G03230		Eukaryotic aspartyl protease family protein	LOC_Os01g71080	xylanase inhibitor
TraesCS3D02G519100	AT1G67230	CRWN1	Protein CROWDED NUCLEI 1	LOC_Os08g08020	expressed protein
TraesCS3D02G528600	AT1G08200	AXS2	UDP-D-apiose/UDP-D-xylose synthase 2	LOC_Os01g73790	NAD dependent epimerase/dehydratase family protein
TraesCS4A02G016600	AT1G69780	ATHB-13	Homeobox-leucine zipper protein ATHB-13	LOC_Os03g07450	homeobox associated leucine zipper
TraesCS4A02G022500	AT4G26140	BGAL12	Beta-galactosidase 12	LOC_Os01g65460	beta-galactosidase precursor
TraesCS4A02G058000	AT5G61000	RPA1D	Replication protein A 70 kDa DNA-binding subunit D	LOC_Os03g11540	RPA1B - Putative single-stranded DNA binding complex subunit 1
TraesCS4A02G064200	AT3G17840	RLK902	Probable inactive receptor kinase RLK902	LOC_Os03g12250	atypical receptor-like kinase MARK
TraesCS4A02G071100	AT4G38650		Glycosyl hydrolase family 10 protein	LOC_Os03g14010	glycosyl hydrolase family 10 protein
TraesCS4A02G099100	AT2G28760	UXS6	UDP-glucuronic acid decarboxylase 6	LOC_Os03g16980	NAD dependent epimerase/dehydratase family domain containing protein
TraesCS4A02G100100	AT5G02560	HTA12	Probable histone H2A.4	LOC_Os05g02300	Core histone H2A/H2B/H3/H4 domain containing protein
TraesCS4A02G100300	AT5G02560	HTA12	Probable histone H2A.4	LOC_Os05g02300	Core histone H2A/H2B/H3/H4 domain containing protein
TraesCS4A02G106800	AT3G54770	ARP1	Probable RNA-binding protein ARP1	LOC_Os03g17760	RNA recognition motif containing protein
TraesCS4A02G107400	AT2G37090	IRX9	Probable beta-1%2C4-xylosyltransferase IRX9	LOC_Os03g17850	glycosyltransferase family 43 protein
TraesCS4A02G118900	AT2G47440		Tetratricopeptide repeat (TPR)-like superfamily protein	LOC_Os03g19200	DNAJ heat shock N-terminal domain-containing protein
TraesCS4A02G166900	AT5G15650	RGP2	UDP-arabinopyranose mutase 2	LOC_Os03g40270	alpha-1
TraesCS4A02G199700	AT3G44220		Late embryogenesis abundant (LEA) hydroxyproline-rich glycoprotein family	LOC_Os12g06260	harpin-induced protein 1 domain containing protein
TraesCS4A02G235800	AT4G33420	PER47	Peroxidase 47	LOC_Os07g44550	peroxidase precursor
TraesCS4A02G264400	AT3G18780	ACT2	Actin-2	LOC_Os01g64630	actin
TraesCS4A02G283900	AT5G62680	NPF2.11	Protein NRT1/ PTR FAMILY 2.11	LOC_Os03g48180	peptide transporter PTR2
TraesCS4A02G293900	AT3G46940	DUT	Deoxyuridine 5'-triphosphate nucleotidohydrolase	LOC_Os03g46640	deoxyuridine 5-triphosphate nucleotidohydrolase
TraesCS4A02G297700	AT5G47430		DWNN domain%2C a CCHC-type zinc finger	LOC_Os03g45730	DNA-binding protein-like
TraesCS4A02G370500	AT1G31770	ABCG14	ABC transporter G family member 14	LOC_Os08g07010	ABC-2 type transporter domain containing protein
TraesCS4A02G408200	AT2G20370	KAM1	Xyloglucan galactosyltransferase KATAMARI1	LOC_Os03g05060	exostosin family domain containing protein
TraesCS4A02G442600	AT5G62790	DXR	1-deoxy-D-xylulose 5-phosphate reductoisomerase%2C chloroplastic	LOC_Os01g01710	1-deoxy-D-xylulose 5-phosphate reductoisomerase
TraesCS4A02G442700	AT1G22360	UGT85A2	UDP-glycosyltransferase 85A2	LOC_Os04g25380	cytokinin-O-glucosyltransferase 2
TraesCS4A02G485400	AT1G62660	BFRUCT3	Acid beta-fructofuranosidase 3%2C vacuolar	LOC_Os02g01590	glycosyl hydrolases
TraesCS4A02G486000	AT1G62660	BFRUCT3	Acid beta-fructofuranosidase 3%2C vacuolar	LOC_Os02g01590	glycosyl hydrolases
TraesCS4B02G013400	AT3G03680		C2 calcium/lipid-binding plant phosphoribosyltransferase family protein	LOC_Os05g30750	anthranilate phosphoribosyltransferase
TraesCS4B02G014700	AT5G17920	MS1	5-methyltetrahydropteroyltriglutamate--homocysteine methyltransferase 1	LOC_Os12g42876	5-methyltetrahydropteroyltriglutamate--homocysteine methyltransferase
TraesCS4B02G019800	AT3G46940	DUT	Deoxyuridine 5'-triphosphate nucleotidohydrolase	LOC_Os03g46640	deoxyuridine 5-triphosphate nucleotidohydrolase
TraesCS4B02G029600	AT5G62680	NPF2.11	Protein NRT1/ PTR FAMILY 2.11	LOC_Os03g48180	peptide transporter PTR2
TraesCS4B02G205200	AT2G28760	UXS6	UDP-glucuronic acid decarboxylase 6	LOC_Os03g16980	NAD dependent epimerase/dehydratase family domain containing protein
TraesCS4B02G241500	AT1G48480	RKL1	Probable inactive receptor kinase At1g48480	LOC_Os03g12250	atypical receptor-like kinase MARK
TraesCS4B02G246900	AT5G08020	RPA1B	Replication protein A 70 kDa DNA-binding subunit B	LOC_Os03g11540	RPA1B - Putative single-stranded DNA binding complex subunit 1
TraesCS4B02G257700	AT1G27752		Ubiquitin system component Cue protein	LOC_Os03g10750	CUE domain containing protein
TraesCS4B02G271000	AT1G20190	EXPA11	Expansin-A11	LOC_Os03g06000	expansin precursor
TraesCS4B02G287600	AT1G69780	ATHB-13	Homeobox-leucine zipper protein ATHB-13	LOC_Os03g07450	homeobox associated leucine zipper
TraesCS4B02G310900	AT2G36830	TIP1-1	Aquaporin TIP1-1	LOC_Os03g05290	aquaporin protein
TraesCS4B02G324000	AT2G02130	PDF2.3	Defensin-like protein 1	LOC_Os03g03810	DEF8 - Defensin and Defensin-like DEFL family
TraesCS4B02G347700	AT1G05260	PER3	Peroxidase 3	LOC_Os03g02920	peroxidase precursor
TraesCS4B02G368400	AT4G00165		Putative lipid-binding protein At4g00165	LOC_Os03g01300	LTPL114 - Protease inhibitor/seed storage/LTP family protein precursor
TraesCS4B02G374400	AT3G60530	GATA4	GATA transcription factor 4	LOC_Os10g40810	GATA zinc finger domain containing protein
TraesCS4B02G375200	AT1G65680	EXPB2	Putative expansin-B2	LOC_Os10g40730	expansin precursor
TraesCS4D02G012900	AT5G17920	MS1	5-methyltetrahydropteroyltriglutamate--homocysteine methyltransferase 1	LOC_Os12g42876	5-methyltetrahydropteroyltriglutamate--homocysteine methyltransferase
TraesCS4D02G050600	AT5G15490	UGD3	UDP-glucose 6-dehydrogenase 3	LOC_Os12g25690	UDP-glucose 6-dehydrogenase
TraesCS4D02G050800	AT3G18780	ACT2	Actin-2	LOC_Os01g64630	actin
TraesCS4D02G056900	AT2G22750	BHLH18	Transcription factor bHLH18	LOC_Os03g51580	helix-loop-helix DNA-binding domain containing protein
TraesCS4D02G143900	AT5G64570	BXL4	Beta-D-xylosidase 4	LOC_Os11g18730	glycosyl hydrolase family 3 protein
TraesCS4D02G189800	AT5G01740		Nuclear transport factor 2 (NTF2) family protein	LOC_Os03g18770	wound-induced protein WI12
TraesCS4D02G198000	AT3G54770	ARP1	Probable RNA-binding protein ARP1	LOC_Os03g17760	RNA recognition motif containing protein
TraesCS4D02G206100	AT2G28760	UXS6	UDP-glucuronic acid decarboxylase 6	LOC_Os03g16980	NAD dependent epimerase/dehydratase family domain containing protein
TraesCS4D02G241100	AT3G17840	RLK902	Probable inactive receptor kinase RLK902	LOC_Os03g12250	atypical receptor-like kinase MARK
TraesCS4D02G246300	AT5G61000	RPA1D	Replication protein A 70 kDa DNA-binding subunit D	LOC_Os03g11540	RPA1B - Putative single-stranded DNA binding complex subunit 1
TraesCS4D02G286400	AT1G69780	ATHB-13	Homeobox-leucine zipper protein ATHB-13	LOC_Os03g07450	homeobox associated leucine zipper
TraesCS4D02G313900	AT1G69340		appr-1-p processing enzyme family protein	LOC_Os10g30750	appr-1-p processing enzyme family protein
TraesCS4D02G327700	AT2G30870	GSTF10	Glutathione S-transferase F10	LOC_Os03g04220	glutathione S-transferase
TraesCS4D02G328400	AT3G48660		Protein of unknown function (DUF 3339)	LOC_Os11g30360	expressed protein
TraesCS4D02G350300	AT1G63120	ATRBL2	RHOMBOID-like 2	LOC_Os03g02530	OsRhmbd7 - Putative Rhomboid homologue
TraesCS4D02G352200	AT5G07390	RBOHA	Respiratory burst oxidase homolog protein A	LOC_Os12g35610	respiratory burst oxidase
TraesCS4D02G361900	AT1G65680	EXPB2	Putative expansin-B2	LOC_Os10g40730	expansin precursor
TraesCS4D02G362800	AT2G45050	GATA2	GATA transcription factor 2	LOC_Os10g40810	GATA zinc finger domain containing protein
TraesCS5A02G088400	AT4G02060	MCM7	DNA replication licensing factor MCM7	LOC_Os12g37400	MCM7 - Putative minichromosome maintenance MCM complex subunit 7
TraesCS5A02G163000	AT5G13460	IQD11	IQ-domain 11	LOC_Os03g23960	IQ calmodulin-binding motif family protein
TraesCS5A02G242300	AT1G47480	CXE2	Probable carboxylesterase 2	LOC_Os09g28690	gibberellin receptor GID1L2
TraesCS5A02G248500	AT1G72230		Cupredoxin superfamily protein	LOC_Os02g52180	plastocyanin-like domain containing protein
TraesCS5A02G254600	AT5G56040		Leucine-rich receptor-like protein kinase family protein	LOC_Os09g30190	receptor-like protein kinase 2 precursor
TraesCS5A02G272600	AT4G33260	CDC20-2	Cell division cycle 20.2%2C cofactor of APC complex	LOC_Os02g47180	WD repeat-containing protein
TraesCS5A02G302400	AT5G28840	GME	GDP-mannose 3%2C5-epimerase	LOC_Os11g37890	NAD dependent epimerase/dehydratase family protein
TraesCS5A02G349300	AT1G19250	FMO1	Probable flavin-containing monooxygenase 1	LOC_Os09g37690	flavin-containing monooxygenase family protein
TraesCS5A02G352100	AT3G51880	HMGB1	High mobility group B protein 1	LOC_Os09g37910	HMG1/2
TraesCS5A02G375200	AT2G34650	PID	Protein kinase PINOID	LOC_Os03g44020	AGC_PVPK_like_kin82y.9 - ACG kinases include homologs to PKA
TraesCS5A02G378700	AT3G22400	LOX5	Linoleate 9S-lipoxygenase 5%2C chloroplastic	LOC_Os03g52860	lipoxygenase
TraesCS5A02G388300	AT3G62710		Glycosyl hydrolase family protein	LOC_Os01g56510	periplasmic beta-glucosidase precursor
TraesCS5A02G394900	AT5G15490	UGD3	UDP-glucose 6-dehydrogenase 3	LOC_Os12g25690	UDP-glucose 6-dehydrogenase
TraesCS5A02G400600	AT3G49960	PER35	Peroxidase 35	LOC_Os03g55420	peroxidase precursor
TraesCS5A02G403400	AT5G66560		BTB/POZ domain-containing protein At5g66560	LOC_Os03g55830	BTBN10 - Bric-a-Brac
TraesCS5A02G426600	AT2G35860	FLA16	Fasciclin-like arabinogalactan protein 16	LOC_Os03g57460	fasciclin domain containing protein
TraesCS5A02G458900	AT3G57490	RPS2D	40S ribosomal protein S2-4	LOC_Os03g59310	ribosomal protein
TraesCS5A02G526000	AT1G63120	ATRBL2	RHOMBOID-like 2	LOC_Os03g02530	OsRhmbd7 - Putative Rhomboid homologue
TraesCS5A02G538000	AT1G65680	EXPB2	Putative expansin-B2	LOC_Os10g40730	expansin precursor
TraesCS5A02G538600	AT2G45050	GATA2	GATA transcription factor 2	LOC_Os10g40810	GATA zinc finger domain containing protein
TraesCS5B02G058200	AT5G59910	HTB4	Histone H2B.11	LOC_Os01g05900	Core histone H2A/H2B/H3/H4 domain containing protein
TraesCS5B02G091200	AT3G62270	BOR2	Probable boron transporter 2	LOC_Os12g37840	boron transporter protein
TraesCS5B02G094600	AT4G02060	MCM7	DNA replication licensing factor MCM7	LOC_Os12g37400	MCM7 - Putative minichromosome maintenance MCM complex subunit 7
TraesCS5B02G097900	AT3G03080		Zinc-binding dehydrogenase family protein	LOC_Os12g12590	NADP-dependent oxidoreductase
TraesCS5B02G130800	AT2G36570	PXC1	Leucine-rich repeat receptor-like protein kinase PXC1	LOC_Os12g05120	receptor kinase
TraesCS5B02G135400	AT5G11230		Probable sugar phosphate/phosphate translocator At5g11230	LOC_Os12g04170	domain of unknown function
TraesCS5B02G194100	AT5G10190		Major facilitator superfamily protein	LOC_Os09g20490	transporter
TraesCS5B02G199100	AT1G70210	CYCD1-1	Cyclin-D1-1	LOC_Os08g32540	cyclin
TraesCS5B02G202000	AT1G14720	XTH28	Probable xyloglucan endotransglucosylase/hydrolase protein 28	LOC_Os09g23220	glycosyl hydrolases family 16
TraesCS5B02G240200	AT1G47480	CXE2	Probable carboxylesterase 2	LOC_Os09g28690	gibberellin receptor GID1L2
TraesCS5B02G335500	AT1G65470	FAS1	Chromatin assembly factor 1 subunit FAS1	LOC_Os01g67100	expressed protein
TraesCS5B02G335800	AT5G03470	B'ALPHA	Serine/threonine protein phosphatase 2A 57 kDa regulatory subunit B' alpha isoform	LOC_Os09g37060	transposon protein
TraesCS5B02G350700	AT1G19250	FMO1	Probable flavin-containing monooxygenase 1	LOC_Os09g37690	flavin-containing monooxygenase family protein
TraesCS5B02G377300	AT2G34650	PID	Protein kinase PINOID	LOC_Os03g44020	AGC_PVPK_like_kin82y.9 - ACG kinases include homologs to PKA
TraesCS5B02G382300	AT3G22400	LOX5	Linoleate 9S-lipoxygenase 5%2C chloroplastic	LOC_Os03g52860	lipoxygenase
TraesCS5B02G393900	AT3G47000		Glycosyl hydrolase family protein	LOC_Os01g56510	periplasmic beta-glucosidase precursor
TraesCS5B02G396900	AT5G60920	COB	Protein COBRA	LOC_Os05g32110	COBRA
TraesCS5B02G400400	AT2G27035	ENODL20	early nodulin-like protein 20	LOC_Os03g55120	plastocyanin-like domain containing protein
TraesCS5B02G409100	AT5G66600		Protein of unknown function%2C DUF547	LOC_Os03g55890	ternary complex factor MIP1
TraesCS5B02G517500	AT4G39350	CESA2	Cellulose synthase A catalytic subunit 2	LOC_Os03g62090	CESA5 - cellulose synthase
TraesCS5D02G029400	AT3G18170		Glycosyltransferase family 61 protein	LOC_Os06g28124	glycosyltransferase
TraesCS5D02G063200	AT5G59910	HTB4	Histone H2B.11	LOC_Os01g05900	Core histone H2A/H2B/H3/H4 domain containing protein
TraesCS5D02G100800	AT4G02060	MCM7	DNA replication licensing factor MCM7	LOC_Os12g37400	MCM7 - Putative minichromosome maintenance MCM complex subunit 7
TraesCS5D02G110600	AT1G08880	HTA5	Probable histone H2AXa	LOC_Os12g34510	Core histone H2A/H2B/H3/H4 domain containing protein
TraesCS5D02G137300	AT5G07720	GT3	Putative glycosyltransferase 3	LOC_Os12g05380	glycosyltransferase
TraesCS5D02G138400	AT2G36570	PXC1	Leucine-rich repeat receptor-like protein kinase PXC1	LOC_Os12g05120	receptor kinase
TraesCS5D02G165400	AT2G23300		Leucine-rich repeat protein kinase family protein	LOC_Os09g02250	transposon protein
TraesCS5D02G172400	AT3G07720		Galactose oxidase/kelch repeat superfamily protein	LOC_Os09g07460	kelch repeat protein
TraesCS5D02G211400	AT1G14900	HMGA	high mobility group A	LOC_Os08g33190	linker histone H1 and H5 family protein
TraesCS5D02G248700	AT1G47480	CXE2	Probable carboxylesterase 2	LOC_Os09g28690	gibberellin receptor GID1L2
TraesCS5D02G252700	AT5G02560	HTA12	Probable histone H2A.4	LOC_Os05g02300	Core histone H2A/H2B/H3/H4 domain containing protein
TraesCS5D02G262400	AT5G56040		Leucine-rich receptor-like protein kinase family protein	LOC_Os09g30190	receptor-like protein kinase 2 precursor
TraesCS5D02G341200	AT1G65470	FAS1	Chromatin assembly factor 1 subunit FAS1	LOC_Os01g67100	expressed protein
TraesCS5D02G359600	AT3G51880	HMGB1	High mobility group B protein 1	LOC_Os09g37910	HMG1/2
TraesCS5D02G388700	AT3G22400	LOX5	Linoleate 9S-lipoxygenase 5%2C chloroplastic	LOC_Os03g52860	lipoxygenase
TraesCS5D02G392000	AT3G04730	IAA16	Auxin-responsive protein IAA16	LOC_Os03g53150	OsIAA13 - Auxin-responsive Aux/IAA gene family member
TraesCS5D02G404300	AT5G15490	UGD3	UDP-glucose 6-dehydrogenase 3	LOC_Os12g25690	UDP-glucose 6-dehydrogenase
TraesCS5D02G404900	AT2G27035	ENODL20	early nodulin-like protein 20	LOC_Os03g55120	plastocyanin-like domain containing protein
TraesCS6A02G001500	AT4G22880	LDOX	Leucoanthocyanidin dioxygenase	LOC_Os01g27490	leucoanthocyanidin dioxygenase
TraesCS6A02G002800				LOC_Os09g26999	keratin-associated protein 5-4
TraesCS6A02G029100	AT4G28650	PXL2	Leucine-rich repeat receptor-like protein kinase PXL2	LOC_Os02g02140	receptor protein kinase CLAVATA1 precursor
TraesCS6A02G108000	AT1G12040	LRX1	Leucine-rich repeat extensin-like protein 1	LOC_Os02g04540	retrotransposon protein
TraesCS6A02G169200	AT2G35650	CSLA7	Probable mannan synthase 7	LOC_Os06g42020	CSLA9 - cellulose synthase-like family A
TraesCS6A02G185400	AT2G32810	BGAL9	Beta-galactosidase 9	LOC_Os01g65460	beta-galactosidase precursor
TraesCS6A02G239900	AT5G66330		Leucine-rich repeat (LRR) family protein	LOC_Os02g43250	receptor-like protein kinase precursor
TraesCS6A02G244900	AT1G01600	CYP86A4	Cytochrome P450 86A4	LOC_Os02g44654	cytochrome P450
TraesCS6A02G316800	AT4G08950	EXO	Protein EXORDIUM	LOC_Os02g52000	phosphate-induced protein 1 conserved region domain containing protein
TraesCS6A02G316900	AT4G08950	EXO	Protein EXORDIUM	LOC_Os02g51970	phosphate-induced protein 1 conserved region domain containing protein
TraesCS6A02G317700	AT1G22400	UGT85A1	UDP-glycosyltransferase 85A1	LOC_Os02g51910	cytokinin-O-glucosyltransferase 2
TraesCS6A02G320300	AT2G03220	FUT1	Galactoside 2-alpha-L-fucosyltransferase	LOC_Os02g52630	xyloglucan fucosyltransferase
TraesCS6A02G325300	AT5G55180		O-Glycosyl hydrolases family 17 protein	LOC_Os02g53200	glucan endo-1
TraesCS6A02G375000	AT5G60700		glycosyltransferase family protein 2	LOC_Os02g56260	expressed protein
TraesCS6A02G408300	AT5G57530	XTH12	Probable xyloglucan endotransglucosylase/hydrolase protein 12	LOC_Os08g13920	glycosyl hydrolases family 16
TraesCS6A02G413400	AT2G24490	RPA2A	Replication protein A 32 kDa subunit A	LOC_Os02g58220	RPA2A - Putative single-stranded DNA binding complex subunit 2
TraesCS6B02G042000	AT4G28650	PXL2	Leucine-rich repeat receptor-like protein kinase PXL2	LOC_Os02g02140	receptor protein kinase CLAVATA1 precursor
TraesCS6B02G078800	AT2G22900	GT7	Putative glycosyltransferase 7	LOC_Os11g34390	glycosyltransferase
TraesCS6B02G197200	AT2G35650	CSLA7	Probable mannan synthase 7	LOC_Os03g07350	CSLA4 - cellulose synthase-like family A; mannan synthase
TraesCS6B02G213300	AT5G42650	CYP74A	Allene oxide synthase%2C chloroplastic	LOC_Os02g12690	cytochrome P450
TraesCS6B02G230300	AT1G18540	RPL6A	60S ribosomal protein L6-1	LOC_Os02g37862	60S ribosomal protein L6
TraesCS6B02G279400	AT1G01600	CYP86A4	Cytochrome P450 86A4	LOC_Os02g44654	cytochrome P450
TraesCS6B02G283200	AT5G61670		Encodes a close homolog of the Cauliflower OR (Orange) protein. The function of OR is to induce the differentiation of proplastids or other noncolored plastids into chromoplasts for carotenoid accumulation. Both proteins contain a Cysteine-rich zi /.../ger domain that is highly specific to DnaJ-like molecular chaperons.	LOC_Os02g43500	OR
TraesCS6B02G296200	AT4G33260	CDC20-2	Cell division cycle 20.2%2C cofactor of APC complex	LOC_Os02g47180	WD repeat-containing protein
TraesCS6B02G330700	AT4G39730		Lipase/lipooxygenase%2C PLAT/LH2 family protein	LOC_Os02g51710	wound/stress protein
TraesCS6B02G334000	AT5G39865		Uncharacterized protein At5g39865	LOC_Os02g51370	glutaredoxin
TraesCS6B02G336500	AT2G03090	EXPA15	Expansin-A15	LOC_Os02g51040	expansin precursor
TraesCS6B02G355600	AT5G55180		O-Glycosyl hydrolases family 17 protein	LOC_Os02g53200	glucan endo-1
TraesCS6B02G379800	AT4G31470		CAP (Cysteine-rich secretory proteins%2C Antigen 5%2C and Pathogenesis-related 1 protein) superfamily protein	LOC_Os02g54570	SCP-like extracellular protein
TraesCS6B02G393500	AT2G07690	MCM5	DNA replication licensing factor MCM5	LOC_Os02g55410	MCM5 - Putative minichromosome maintenance MCM complex subunit 5
TraesCS6B02G408000				LOC_Os10g08780	expressed protein
TraesCS6B02G419000	AT1G69770	CMT3	DNA (cytosine-5)-methyltransferase CMT3	LOC_Os03g12570	expressed protein
TraesCS6D02G004300	AT4G22880	LDOX	Leucoanthocyanidin dioxygenase	LOC_Os01g27490	leucoanthocyanidin dioxygenase
TraesCS6D02G033300	AT4G28650	PXL2	Leucine-rich repeat receptor-like protein kinase PXL2	LOC_Os02g02140	receptor protein kinase CLAVATA1 precursor
TraesCS6D02G062300	AT5G02560	HTA12	Probable histone H2A.4	LOC_Os01g31800	Core histone H2A/H2B/H3/H4 domain containing protein
TraesCS6D02G158600	AT2G35650	CSLA7	Probable mannan synthase 7	LOC_Os03g07350	CSLA4 - cellulose synthase-like family A; mannan synthase
TraesCS6D02G167600	AT4G22810	AHL24	AT-hook motif nuclear-localized protein 24	LOC_Os02g25020	DNA binding protein
TraesCS6D02G222100	AT5G66330		Leucine-rich repeat (LRR) family protein	LOC_Os02g43250	receptor-like protein kinase precursor
TraesCS6D02G227200	AT1G01600	CYP86A4	Cytochrome P450 86A4	LOC_Os02g44654	cytochrome P450
TraesCS6D02G281600	AT1G78060	BXL7	Probable beta-D-xylosidase 7	LOC_Os02g51620	glycosyl hydrolase family 3 protein
TraesCS6D02G287100	AT2G03090	EXPA15	Expansin-A15	LOC_Os02g51040	expansin precursor
TraesCS6D02G296100	AT4G08950	EXO	Protein EXORDIUM	LOC_Os02g52040	phosphate-induced protein 1 conserved region domain containing protein
TraesCS6D02G296300	AT4G08950	EXO	Protein EXORDIUM	LOC_Os02g52000	phosphate-induced protein 1 conserved region domain containing protein
TraesCS6D02G296400	AT4G08950	EXO	Protein EXORDIUM	LOC_Os02g51970	phosphate-induced protein 1 conserved region domain containing protein
TraesCS6D02G305000	AT5G55180		O-Glycosyl hydrolases family 17 protein	LOC_Os02g53200	glucan endo-1
TraesCS6D02G329200	AT4G31470		CAP (Cysteine-rich secretory proteins%2C Antigen 5%2C and Pathogenesis-related 1 protein) superfamily protein	LOC_Os02g54570	SCP-like extracellular protein
TraesCS6D02G344100	AT2G07690	MCM5	DNA replication licensing factor MCM5	LOC_Os02g55410	MCM5 - Putative minichromosome maintenance MCM complex subunit 5
TraesCS6D02G347500	AT1G22360	UGT85A2	UDP-glycosyltransferase 85A2	LOC_Os04g25440	cytokinin-O-glucosyltransferase 2
TraesCS6D02G364900	AT1G69770	CMT3	DNA (cytosine-5)-methyltransferase CMT3	LOC_Os03g12570	expressed protein
TraesCS6D02G367700	AT1G09560	GLP4	Germin-like protein subfamily 2 member 1	LOC_Os01g18170	Cupin domain containing protein
TraesCS6D02G392100	AT5G57530	XTH12	Probable xyloglucan endotransglucosylase/hydrolase protein 12	LOC_Os08g13920	glycosyl hydrolases family 16
TraesCS7A02G009100	AT1G62660	BFRUCT3	Acid beta-fructofuranosidase 3%2C vacuolar	LOC_Os02g01590	glycosyl hydrolases
TraesCS7A02G063300	AT5G57550	XTH25	Probable xyloglucan endotransglucosylase/hydrolase protein 25	LOC_Os08g13920	glycosyl hydrolases family 16
TraesCS7A02G131200	AT2G21790	RNR1	Ribonucleoside-diphosphate reductase large subunit	LOC_Os06g07210	ribonucleoside-diphosphate reductase large subunit
TraesCS7A02G131287
TraesCS7A02G218600	AT3G07650	COL9	Zinc finger protein CONSTANS-LIKE 9	LOC_Os06g19444	CCT/B-box zinc finger protein
TraesCS7A02G234800	AT4G26540		Probable LRR receptor-like serine/threonine-protein kinase At4g26540	LOC_Os08g38560	receptor-like protein kinase 2 precursor
TraesCS7A02G245400	AT3G57830		Leucine-rich repeat protein kinase family protein	LOC_Os08g39590	inactive receptor kinase At2g26730 precursor
TraesCS7A02G256000	AT2G43130	RABA5C	Ras-related protein RABA5c	LOC_Os08g41340	ras-related protein
TraesCS7A02G329300	AT5G23420	HMGB7	High mobility group B protein 7	LOC_Os08g01100	HMG1/2
TraesCS7A02G331300	AT3G16240	TIP2-1	Aquaporin TIP2-1	LOC_Os06g22960	aquaporin protein
TraesCS7A02G353900	AT4G20840		FAD-binding Berberine family protein	LOC_Os06g35630	reticuline oxidase-like protein precursor
TraesCS7A02G361600	AT5G21105		Plant L-ascorbate oxidase	LOC_Os06g37080	L-ascorbate oxidase precursor
TraesCS7A02G363000	AT2G36870	XTH32	Probable xyloglucan endotransglucosylase/hydrolase protein 32	LOC_Os07g29750	glycosyl hydrolases family 16
TraesCS7A02G438400	AT5G02560	HTA12	Probable histone H2A.4	LOC_Os05g02300	Core histone H2A/H2B/H3/H4 domain containing protein
TraesCS7A02G455400	AT3G63430		unknown protein%3B BEST Arabidopsis thaliana protein match is: unknown protein (TAIR:AT1G74160.1)%3B Has 135 Blast hits to 119 proteins in 22 species: Archae - 0%3B Bacteria - 2%3B Metazoa - 3%3B Fungi - 3%3B Plants - 119%3B Viruses - 0%3B Other Eukaryotes - 8 (sou /.../CBI BLink).	LOC_Os11g37670	expressed protein
TraesCS7A02G523900	AT2G23300		Leucine-rich repeat protein kinase family protein	LOC_Os06g43170	transposon protein
TraesCS7A02G526500	AT5G67300	MYB44	Transcription factor MYB44	LOC_Os06g43090	MYB transcription factor TaMYB1
TraesCS7B02G031500	AT2G21790	RNR1	Ribonucleoside-diphosphate reductase large subunit	LOC_Os06g07210	ribonucleoside-diphosphate reductase large subunit
TraesCS7B02G104600	AT2G32990	AtGH9B8	Endoglucanase 11	LOC_Os02g50490	endoglucanase
TraesCS7B02G112000	AT3G27060	TSO2	Ribonucleoside-diphosphate reductase small chain C	LOC_Os06g14620	ribonucleoside-diphosphate reductase small chain
TraesCS7B02G125500	AT3G07650	COL9	Zinc finger protein CONSTANS-LIKE 9	LOC_Os06g19444	CCT/B-box zinc finger protein
TraesCS7B02G146500	AT3G20830	UCNL	Serine/threonine-protein kinase UCNL	LOC_Os08g39460	AGC_PVPK_like_CDK8.2 - ACG kinases include homologs to PKA
TraesCS7B02G167800	AT5G52060	BAG1	BAG family molecular chaperone regulator 1	LOC_Os08g43270	BAG domain-containing protein
TraesCS7B02G188400	AT3G03050	CSLD3	Cellulose synthase-like protein D3	LOC_Os08g06380	CSLF6 - cellulose synthase-like family F; beta1
TraesCS7B02G215700	AT1G12420	ACR8	ACT domain-containing protein ACR8	LOC_Os03g14370	ACT domain containing protein
TraesCS7B02G254700	AT3G57450		unknown protein%3B Has 65 Blast hits to 65 proteins in 11 species: Archae - 0%3B Bacteria - 0%3B Metazoa - 0%3B Fungi - 0%3B Plants - 65%3B Viruses - 0%3B Other Eukaryotes - 0 (source: NCBI BLink).	LOC_Os03g52410	expressed protein
TraesCS7B02G310700	AT3G18180		Glycosyltransferase family 61 protein	LOC_Os06g49320	glycosyltransferase
TraesCS7B02G314900	AT1G12040	LRX1	Leucine-rich repeat extensin-like protein 1	LOC_Os06g49100	retrotransposon protein
TraesCS7B02G319200	AT4G25890	RPP3A	60S acidic ribosomal protein P3-1	LOC_Os01g13080	60S acidic ribosomal protein
TraesCS7B02G325800	AT5G06730	PER54	Peroxidase 54	LOC_Os10g02040	peroxidase precursor
TraesCS7B02G336900	AT5G02560	HTA12	Probable histone H2A.4	LOC_Os05g02300	Core histone H2A/H2B/H3/H4 domain containing protein
TraesCS7B02G337400	AT5G02560	HTA12	Probable histone H2A.4	LOC_Os05g02300	Core histone H2A/H2B/H3/H4 domain containing protein
TraesCS7B02G355800	AT3G63430		unknown protein%3B BEST Arabidopsis thaliana protein match is: unknown protein (TAIR:AT1G74160.1)%3B Has 135 Blast hits to 119 proteins in 22 species: Archae - 0%3B Bacteria - 2%3B Metazoa - 3%3B Fungi - 3%3B Plants - 119%3B Viruses - 0%3B Other Eukaryotes - 8 (sou /.../CBI BLink).	LOC_Os11g37670	expressed protein
TraesCS7B02G436700	AT2G10940		Bifunctional inhibitor/lipid-transfer protein/seed storage 2S albumin superfamily protein	LOC_Os06g43600	LTPL129 - Protease inhibitor/seed storage/LTP family protein precursor
TraesCS7D02G010300	AT5G62390	BAG7	BAG family molecular chaperone regulator 7	LOC_Os06g01500	IQ calmodulin-binding motif family protein
TraesCS7D02G018600	AT4G34215		Probable carbohydrate esterase At4g34215	LOC_Os03g64050	receptor protein kinase
TraesCS7D02G043600	AT4G28310		unknown protein%3B BEST Arabidopsis thaliana protein match is: unknown protein (TAIR:AT1G52270.1)%3B Has 30201 Blast hits to 17322 proteins in 780 species: Archae - 12%3B Bacteria - 1396%3B Metazoa - 17338%3B Fungi - 3422%3B Plants - 5037%3B Viruses - 0%3B Other Eu /.../es - 2996 (source: NCBI BLink).	LOC_Os06g02530	expressed protein
TraesCS7D02G051000	AT1G22360	UGT85A2	UDP-glycosyltransferase 85A2	LOC_Os04g25970	cytokinin-O-glucosyltransferase 2
TraesCS7D02G057300	AT5G42830		HXXXD-type acyl-transferase family protein	LOC_Os06g01350	transferase family protein
TraesCS7D02G116700	AT3G55700	UGT76F1	UDP-glycosyltransferase 76F1	LOC_Os11g25454	cytokinin-N-glucosyltransferase 1
TraesCS7D02G130605
TraesCS7D02G171800	AT2G03220	FUT1	Galactoside 2-alpha-L-fucosyltransferase	LOC_Os06g10950	xyloglucan fucosyltransferase
TraesCS7D02G191600	AT2G01420	PIN4	Auxin efflux carrier component 4	LOC_Os02g50960	auxin efflux carrier component
TraesCS7D02G207800	AT3G27060	TSO2	Ribonucleoside-diphosphate reductase small chain C	LOC_Os06g14620	ribonucleoside-diphosphate reductase small chain
TraesCS7D02G213300	AT2G05920		Subtilase family protein	LOC_Os10g25450	OsSub60 - Putative Subtilisin homologue
TraesCS7D02G220300	AT3G07650	COL9	Zinc finger protein CONSTANS-LIKE 9	LOC_Os06g19444	CCT/B-box zinc finger protein
TraesCS7D02G262400	AT5G14130	PER55	Peroxidase 55	LOC_Os08g42030	peroxidase precursor
TraesCS7D02G272700	AT1G54580	ACP2	Acyl carrier protein 2%2C chloroplastic	LOC_Os08g43580	acyl carrier protein
TraesCS7D02G284100	AT2G36910	ABCB1	ABC transporter B family member 1	LOC_Os08g45030	multidrug resistance protein
TraesCS7D02G294300	AT3G03050	CSLD3	Cellulose synthase-like protein D3	LOC_Os07g36630	CSLF8 - cellulose synthase-like family F; beta1
TraesCS7D02G302400	AT5G61480	TDR	Leucine-rich repeat receptor-like protein kinase TDR	LOC_Os08g05290	receptor-like protein kinase 5 precursor
TraesCS7D02G312200	AT1G12420	ACR8	ACT domain-containing protein ACR8	LOC_Os03g14370	ACT domain containing protein
TraesCS7D02G342800	AT2G42880	MPK20	Mitogen-activated protein kinase 20	LOC_Os01g47530	CGMC_MAPKCMGC_2.6 - CGMC includes CDA
TraesCS7D02G359500	AT4G26140	BGAL12	Beta-galactosidase 12	LOC_Os03g15020	beta-galactosidase precursor
TraesCS7D02G382200	AT5G54540		Uncharacterised conserved protein (UCP012943)	LOC_Os08g08190	expressed protein
TraesCS7D02G428300	AT5G02560	HTA12	Probable histone H2A.4	LOC_Os05g02300	Core histone H2A/H2B/H3/H4 domain containing protein
TraesCS7D02G442100	AT1G67630	POLA2	DNA polymerase alpha 2	LOC_Os12g13950	POLA2 - Putative DNA polymerase alpha complex subunit
TraesCS7D02G444300	AT3G63430		unknown protein%3B BEST Arabidopsis thaliana protein match is: unknown protein (TAIR:AT1G74160.1)%3B Has 135 Blast hits to 119 proteins in 22 species: Archae - 0%3B Bacteria - 2%3B Metazoa - 3%3B Fungi - 3%3B Plants - 119%3B Viruses - 0%3B Other Eukaryotes - 8 (sou /.../CBI BLink).	LOC_Os11g37670	expressed protein
TraesCS7D02G478800	AT5G57090	PIN2	Auxin efflux carrier component 2	LOC_Os06g44970	auxin efflux carrier component
TraesCS7D02G509800	AT2G10940		Bifunctional inhibitor/lipid-transfer protein/seed storage 2S albumin superfamily protein	LOC_Os06g43600	LTPL129 - Protease inhibitor/seed storage/LTP family protein precursor
TraesCSU02G005100	AT3G55710	UGT76F2	UDP-glycosyltransferase 76F2	LOC_Os11g25454	cytokinin-N-glucosyltransferase 1
TraesCSU02G024900	AT1G12380		unknown protein%3B BEST Arabidopsis thaliana protein match is: unknown protein (TAIR:AT1G62870.1)%3B Has 173 Blast hits to 170 proteins in 34 species: Archae - 0%3B Bacteria - 4%3B Metazoa - 25%3B Fungi - 8%3B Plants - 123%3B Viruses - 7%3B Other Eukaryotes - 6 (so /.../NCBI BLink).	LOC_Os04g19140	expressed protein
TraesCSU02G038400	AT1G45688		unknown protein%3B FUNCTIONS IN: molecular_function unknown%3B INVOLVED IN: biological_process unknown%3B LOCATED IN: plasma membrane%3B EXPRESSED IN: 22 plant structures%3B EXPRESSED DURING: 13 growth stages%3B BEST Arabidopsis thaliana protein match is: unkno /.../tein (TAIR:AT5G42860.1)%3B Has 35333 Blast hits to 34131 proteins in 2444 species: Archae - 798%3B Bacteria - 22429%3B Metazoa - 974…	LOC_Os04g59330	expressed protein
TraesCSU02G038900	AT4G31590	CSLC5	Probable xyloglucan glycosyltransferase 5	LOC_Os09g25900	CSLC2 - cellulose synthase-like family C
TraesCSU02G042400
TraesCSU02G057800
TraesCSU02G093300	AT3G55700	UGT76F1	UDP-glycosyltransferase 76F1	LOC_Os11g25454	cytokinin-N-glucosyltransferase 1
TraesCSU02G114400	AT2G34500	CYP710A1	Cytochrome P450 710A1	LOC_Os01g11340	cytochrome P450
TraesCSU02G142500	AT4G32410	CESA1	Cellulose synthase A catalytic subunit 1	LOC_Os05g08370	CESA1 - cellulose synthase
